# Supplementary material for: Highly twisted carbazole-borane derivatives: B–N stereodynamic analysis and consequences on their emission properties
Source: Royal Society of Chemistry journal article supplement (doi:10.1039/d1qo00715g), 2021-01-01
Supplement: d1qo00715g1.pdf [file d1qo00715g1.pdf]

## Highly twisted carbazole-borane derivatives. B-N Stereodynamic analysis and consequences on their emission properties.

Daniel Pecorari, Andrea Mazzanti, Stefano Gianvittorio, Simone Foschi, Stefano Stagni, Valentina Fiorini, Michele Mancinelli.

e-mail: [michele.mancinelli@unibo.it](mailto:michele.mancinelli@unibo.it)

Supporting information

### Table of contents

|                                                                                                             |            |
|-------------------------------------------------------------------------------------------------------------|------------|
| <b>Figure S1: <sup>1</sup>H-NMR variable temperature spectra of compound 1 .....</b>                        | <b>2</b>   |
| <b>Figure S2-S3: NOESY experiments of compound 2b.....</b>                                                  | <b>3</b>   |
| <b>Figures S4: Kinetic analysis of compound 2b .....</b>                                                    | <b>5</b>   |
| <b>Figure S5-S14: <sup>1</sup>H-NMR variable temperature spectra and kinetic analysis of compounds.....</b> | <b>6</b>   |
| <b>Table S1-S2: Photophysical data summary for compounds 2 –8 .....</b>                                     | <b>16</b>  |
| <b>Figures S15-S84 Photophysical spectra for compounds 2-8.....</b>                                         | <b>18</b>  |
| <b>Figure S85: Calculated orbitals HOMO and LUMO for compound 2a.....</b>                                   | <b>41</b>  |
| <b>Synthesis Details .....</b>                                                                              | <b>42</b>  |
| <b>Crystal Data for compounds.....</b>                                                                      | <b>58</b>  |
| <b>NMR Spectra .....</b>                                                                                    | <b>109</b> |
| <b>XYZ Coordinates.....</b>                                                                                 | <b>125</b> |
| <b>Fluorescencecalculations.....</b>                                                                        | <b>269</b> |

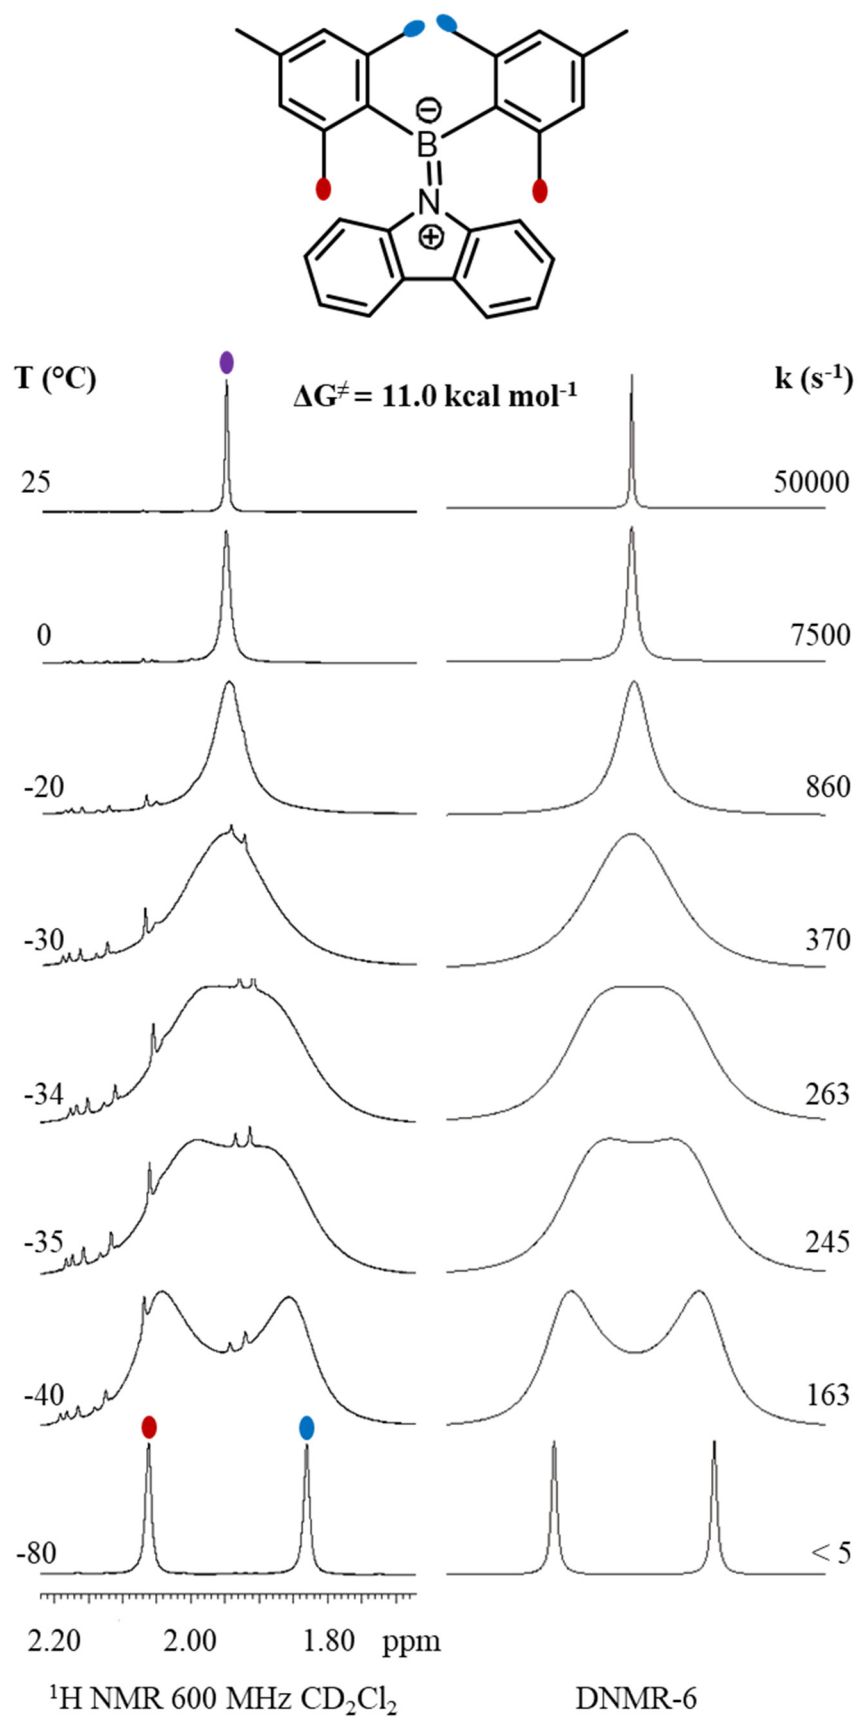

Figure S1. Left: <sup>1</sup>H-NMR variable temperature spectra of the *ortho* methyls of compound **1** (600 MHz in CD<sub>2</sub>Cl<sub>2</sub>). Right: line shape simulation with the corresponding rate constants.

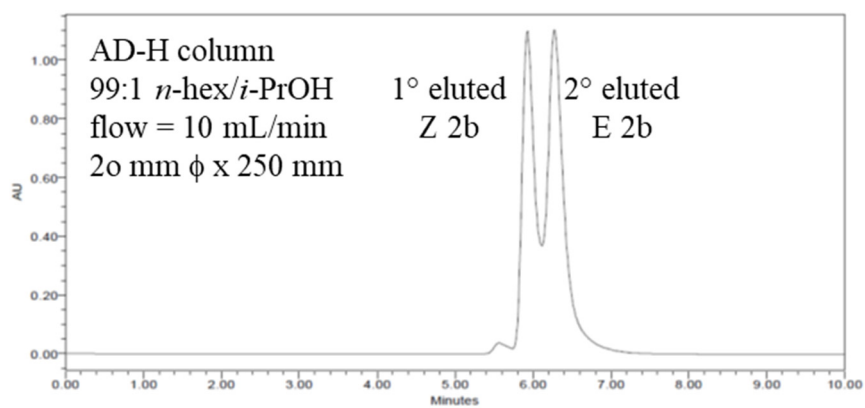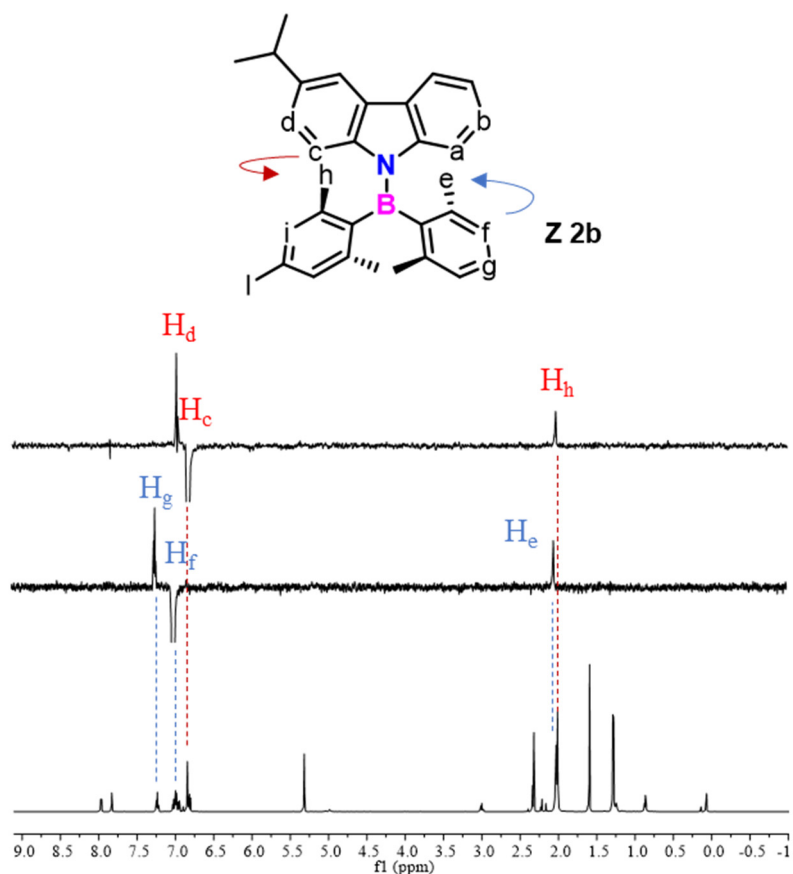

Figure S2. Top: CSP-HPLC separations of two stereoisomer **2b**. Bottom: Characterization of first eluted HPLC by NOESY experiments gives Z configuration (**Z 2b**).

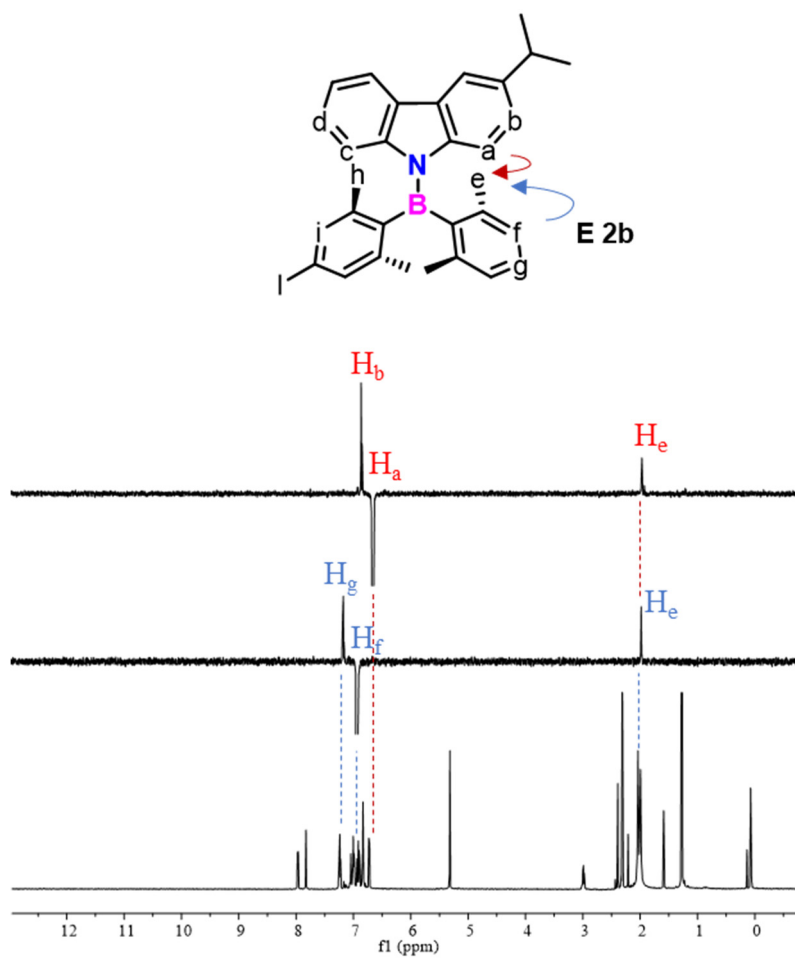

Figure S3. Characterization of second eluted HPLC by NOESY experiments gives E configuration (**E 2b**).

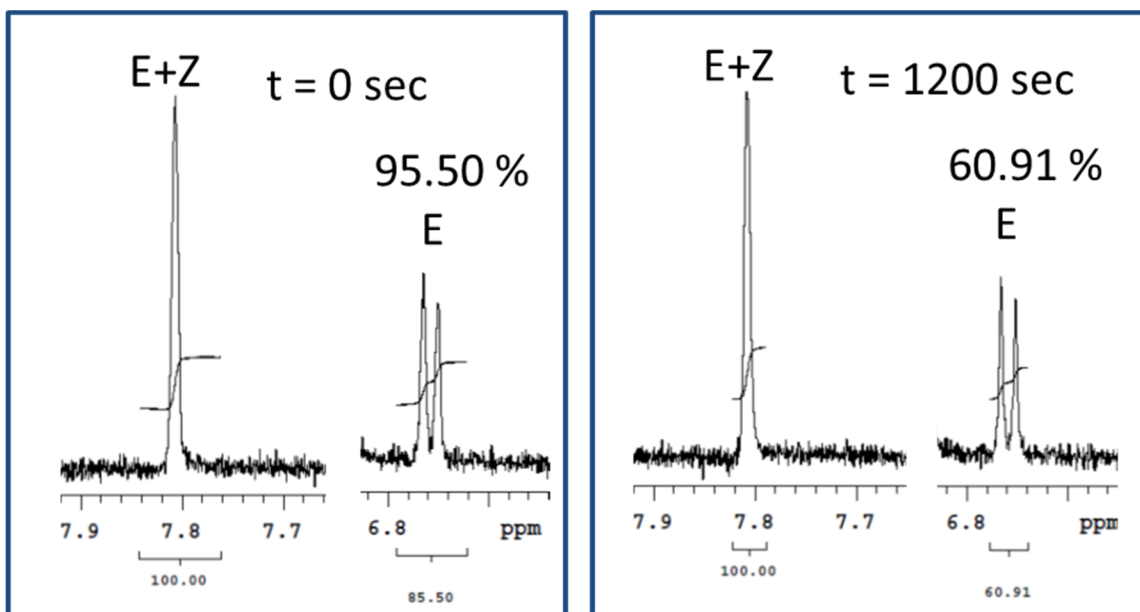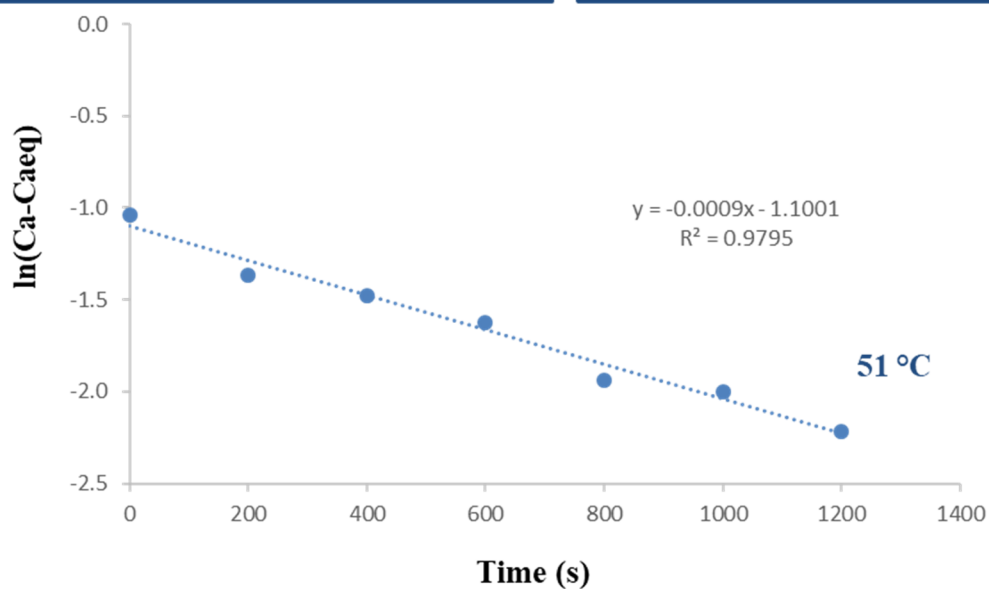

| t (s)                          | T (°C) |                |
|--------------------------------|--------|----------------|
|                                | 51     |                |
|                                | % E    | ln (Ca - Caeq) |
| 0                              | 85.5   | -1.0356        |
| 200                            | 75.56  | -1.3641        |
| 400                            | 72.82  | -1.4775        |
| 600                            | 69.73  | -1.6230        |
| 800                            | 64.41  | -1.9372        |
| 1000                           | 63.55  | -1.9988        |
| 1200                           | 60.91  | -2.2155        |
| $\Delta G^\ddagger$ (kcal/mol) | 24.0   |                |

Figure S4. Kinetic analysis starting from the **E-2b** isomer.

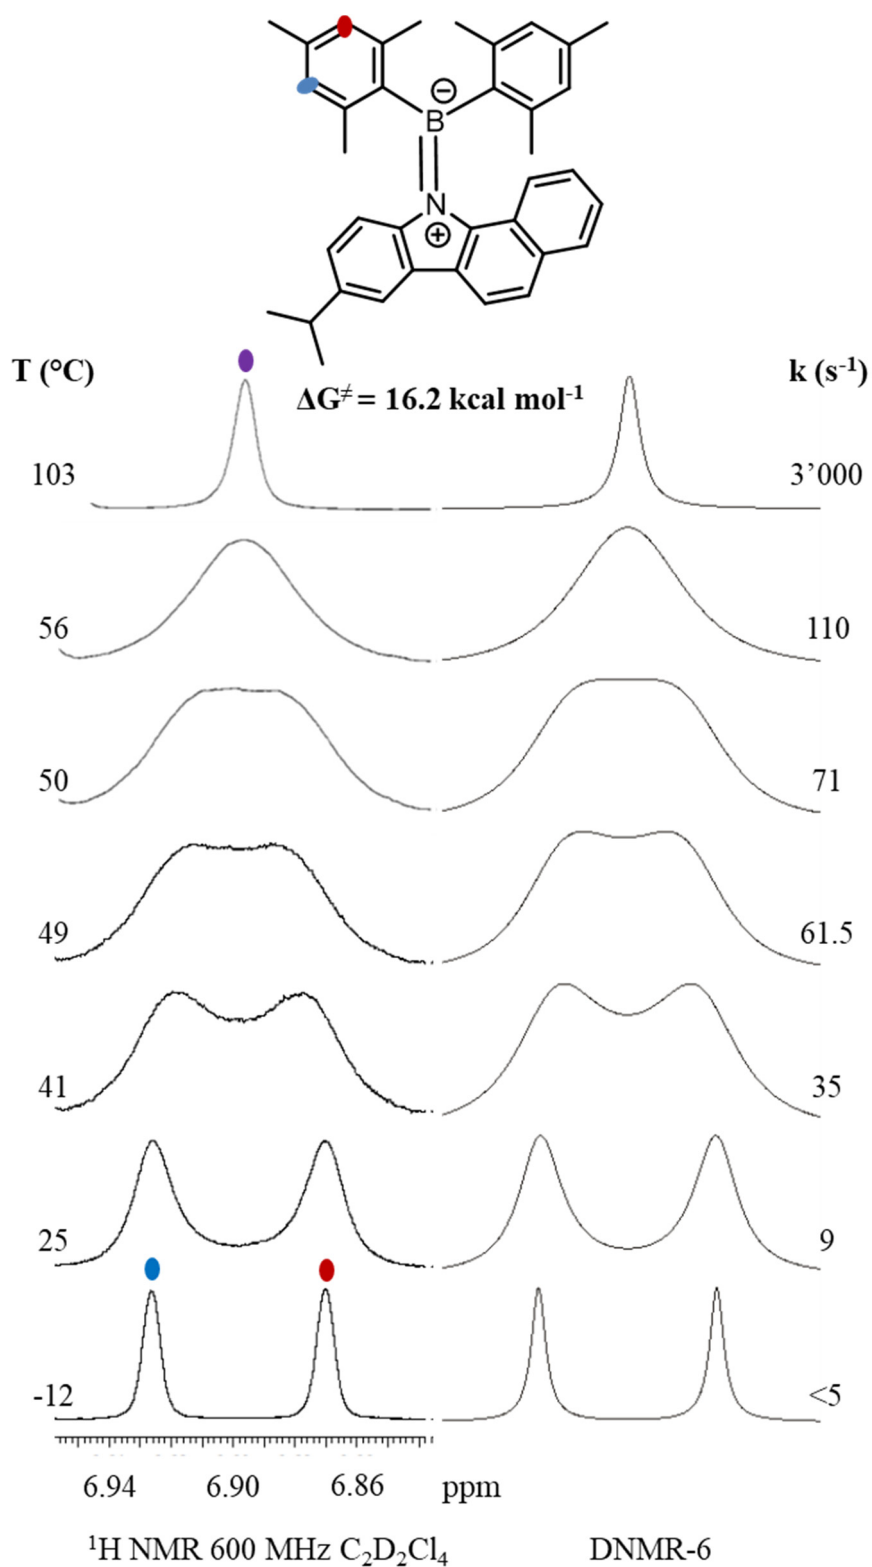

Figure S5. Left:  $^1\text{H-NMR}$  variable temperature spectra of the *ortho* methyls of compound **6** (600 MHz in  $\text{C}_2\text{D}_2\text{Cl}_4$ ). Right: line shape simulation with the corresponding rate constants.

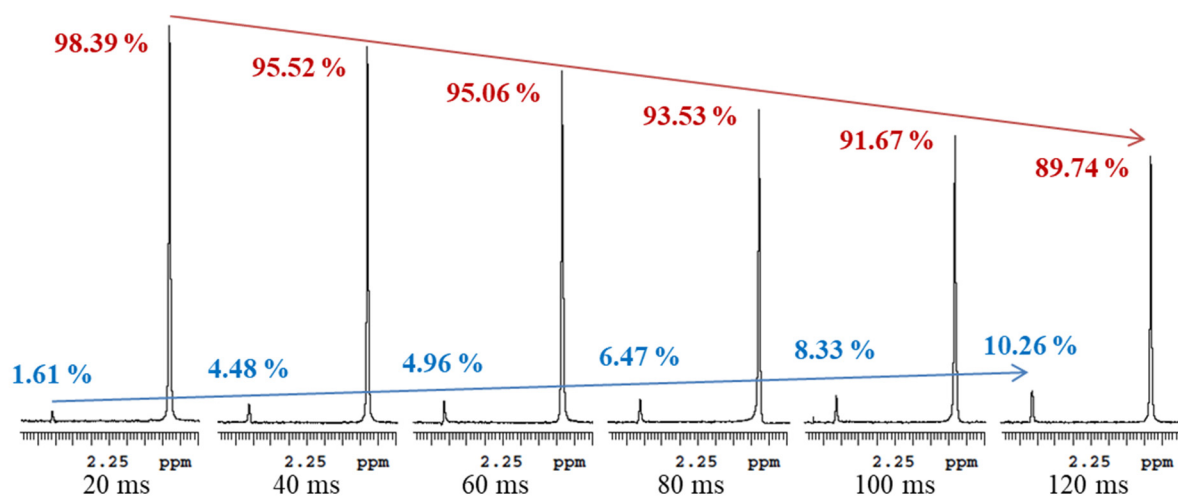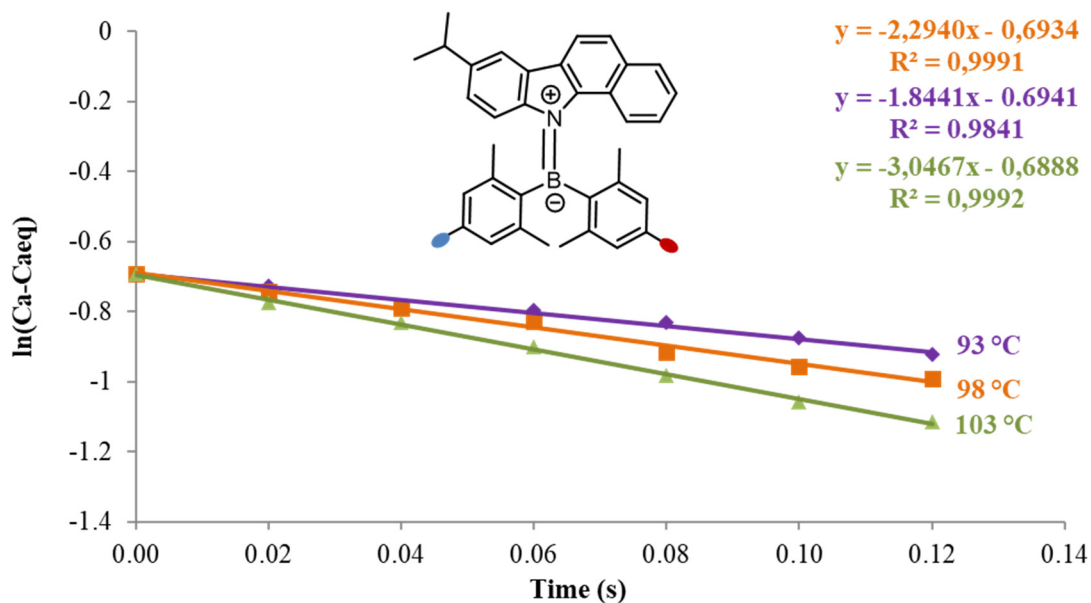

| t (s)                          | T (°C)         |        |        |
|--------------------------------|----------------|--------|--------|
|                                | 93             | 98     | 103    |
|                                | ln (Ca - Caeq) |        |        |
| 0                              | -0.693         | -0.693 | -0.693 |
| 0.02                           | -0.733         | -0.743 | -0.780 |
| 0.04                           | -0.779         | -0.789 | -0.844 |
| 0.06                           | -0.809         | -0.828 | -0.909 |
| 0.08                           | -0.839         | -0.915 | -1.002 |
| 0.1                            | -0.876         | -0.957 | -1.061 |
| 0.12                           | -0.924         | -0.991 | -1.141 |
| $\Delta G^\ddagger$ (kcal/mol) | 21.63          | 21.69  | 21.73  |
|                                | 21.7           |        |        |

Figure S6. 1D-EXSY spectra were acquired at three different temperatures (+93, +98 and +103 °C) to derive three rate constants useful for the determination of the energy barrier of compound **6**.

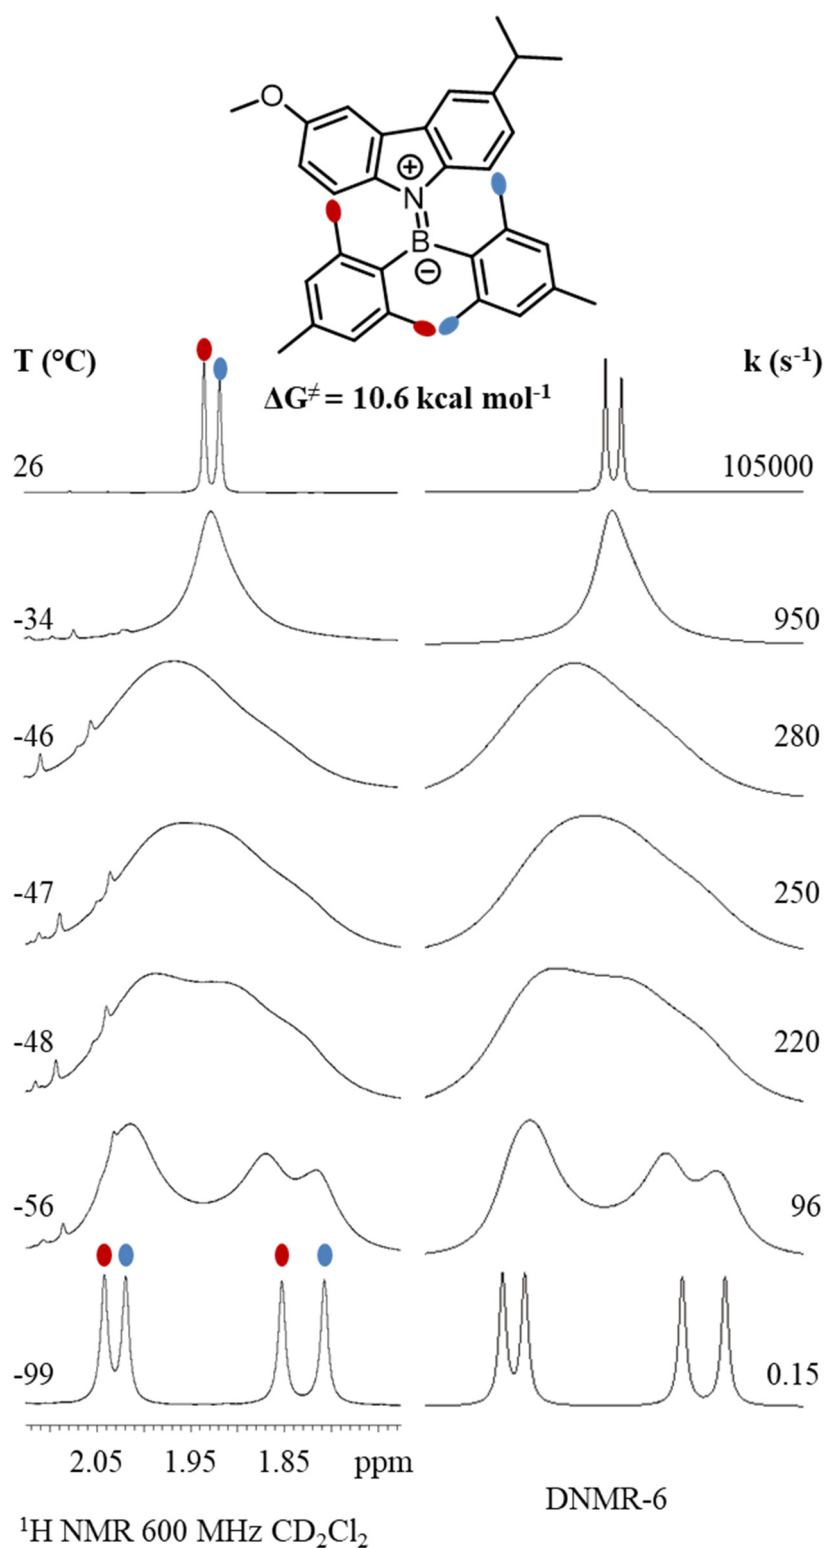

Figure S7. Left:  $^1\text{H-NMR}$  variable temperature spectra of the *ortho* methyls of compound **3** (600 MHz in  $\text{CD}_2\text{Cl}_2$ ). Right: line shape simulation with the corresponding rate constants.



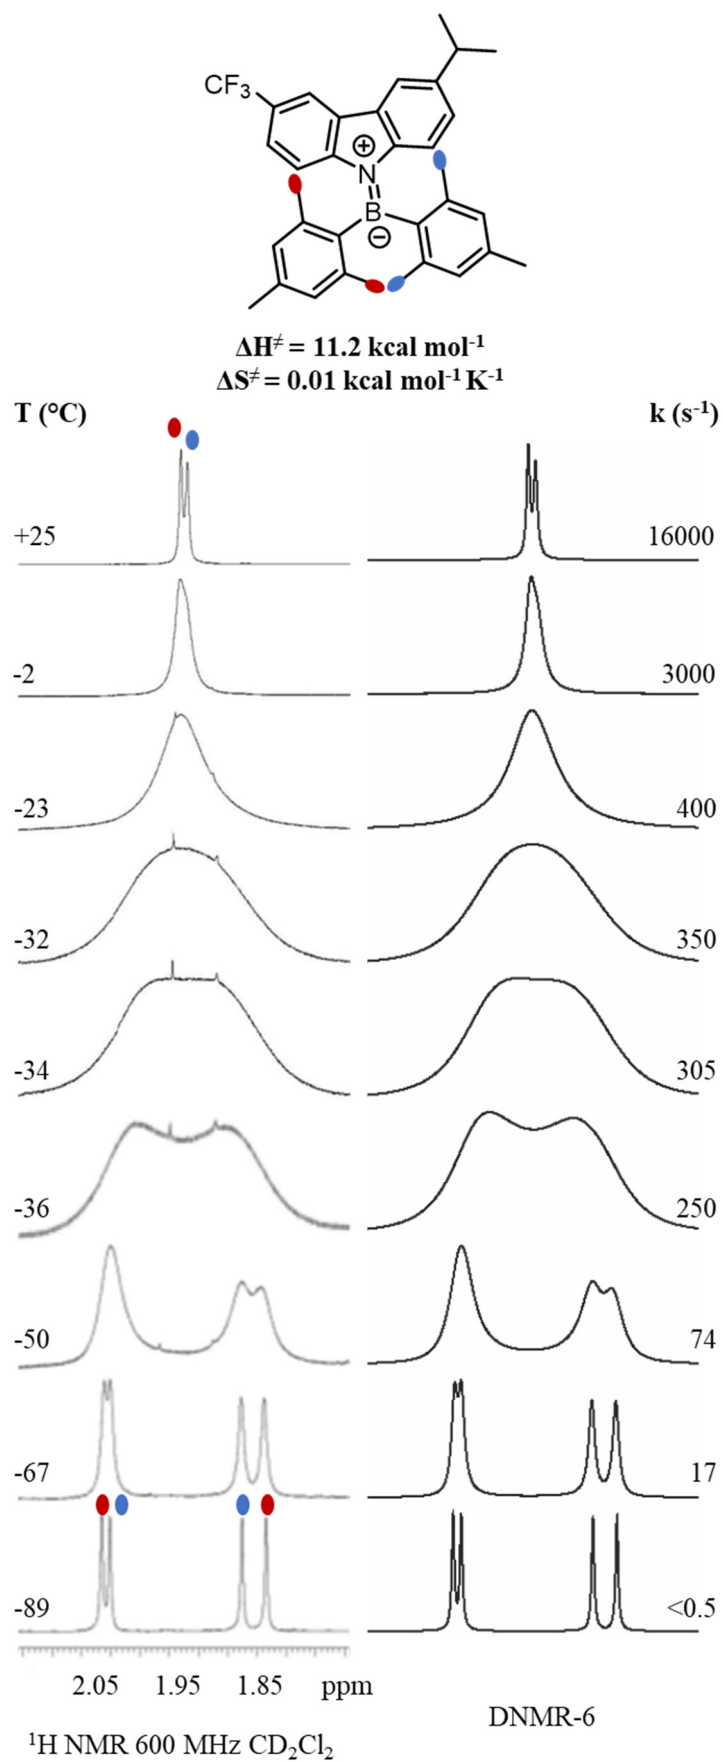

Figure S8. Left: <sup>1</sup>H-NMR variable temperature spectra of the *ortho* methyls of compound **4** (600 MHz in CD<sub>2</sub>Cl<sub>2</sub>). Right: line shape simulation with the corresponding rate constants.

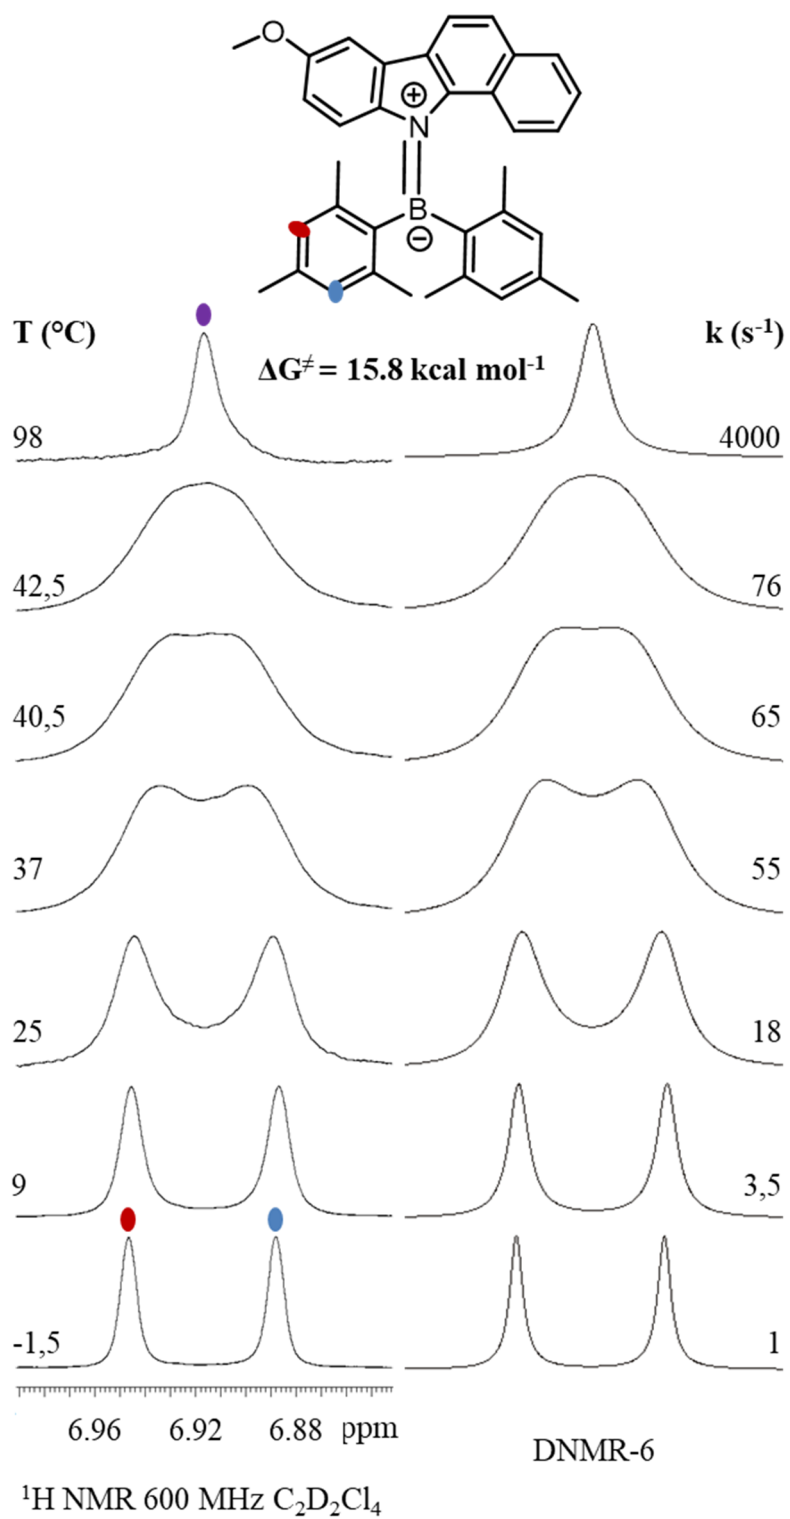

Figure S9. Left: <sup>1</sup>H-NMR variable temperature spectra of the *ortho* methyls of compound **7** (600 MHz in C<sub>2</sub>D<sub>2</sub>Cl<sub>4</sub>). Right: line shape simulation with the corresponding rate constants.

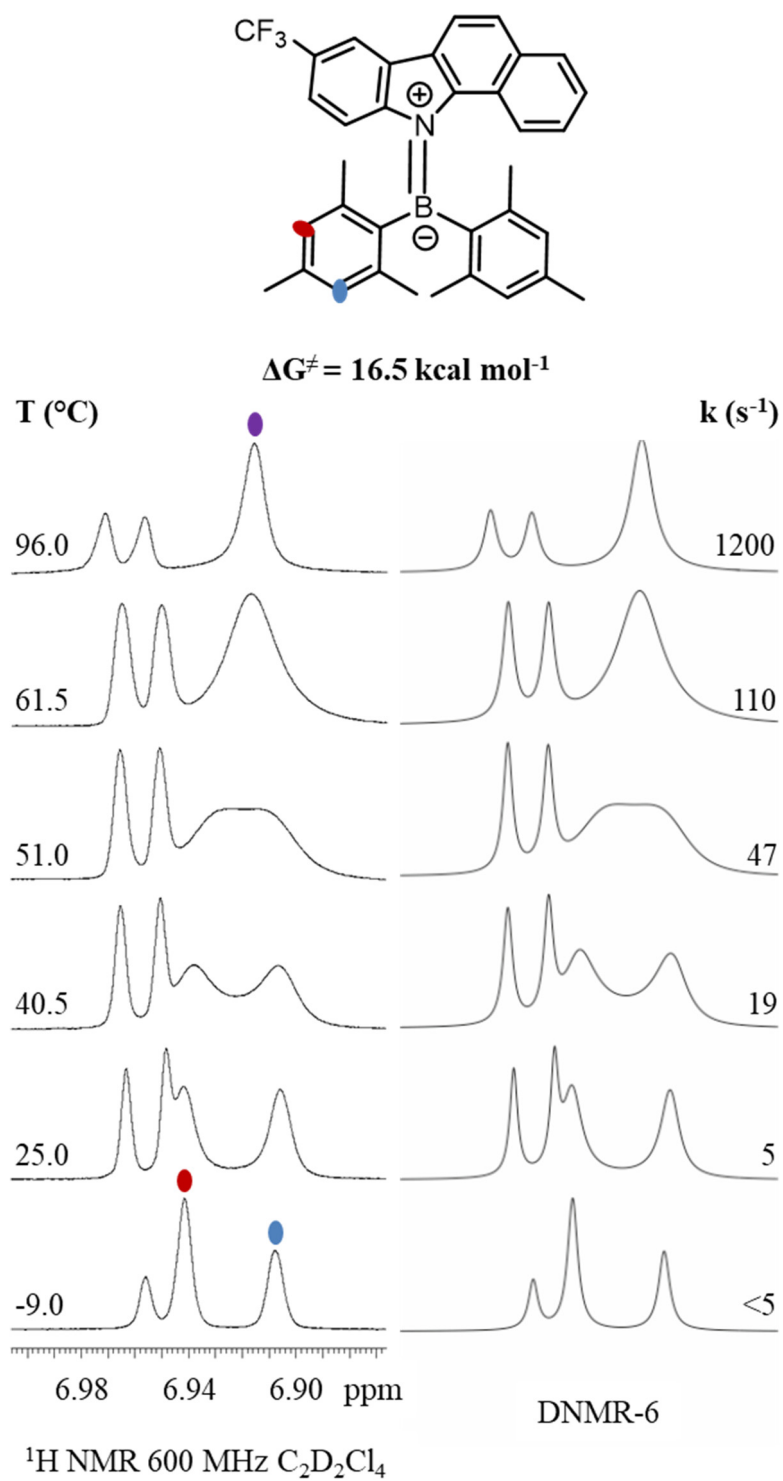

Figure S10. Left:  $^1\text{H-NMR}$  variable temperature spectra of the *ortho* methyls of compound **8** (600 MHz in  $\text{C}_2\text{D}_2\text{Cl}_4$ ). Right: line shape simulation with the corresponding rate constants.

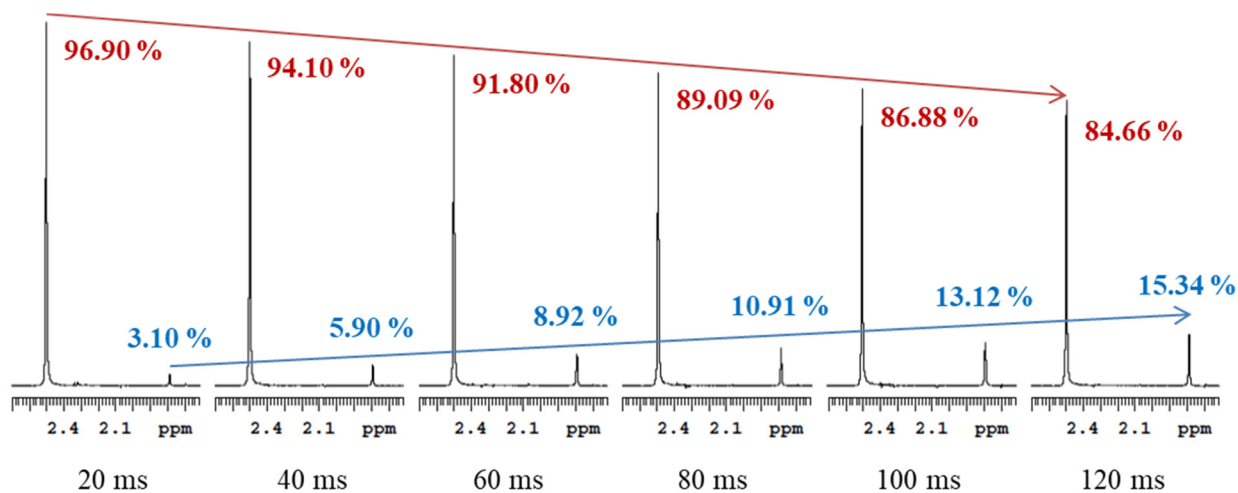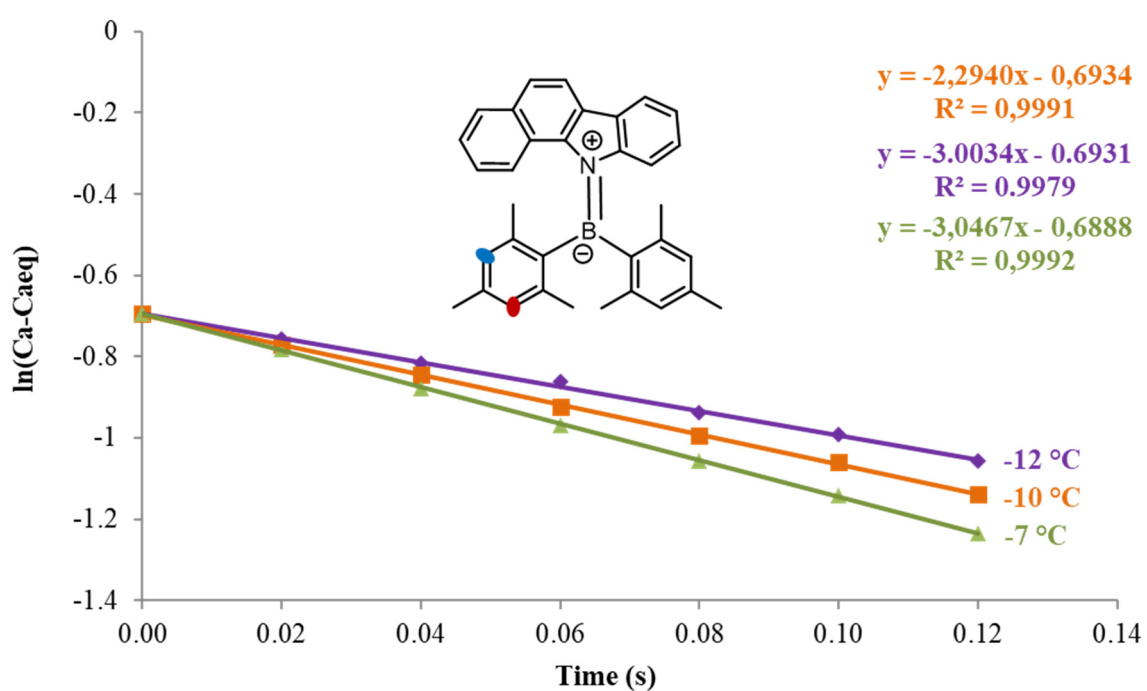

| t (s)                          | T (°C)                           |              |              |
|--------------------------------|----------------------------------|--------------|--------------|
|                                | -12                              | -10          | -7           |
|                                | <b>ln (Ca - Ca<sub>eq</sub>)</b> |              |              |
| 0.0                            | -0.693147181                     | -0.693147181 | -0.693147181 |
| 0.02                           | -0.757152511                     | -0.772190388 | -0.783071888 |
| 0.04                           | -0.818710404                     | -0.84304027  | -0.87803202  |
| 0.06                           | -0.872273846                     | -0.922560345 | -0.968110481 |
| 0.08                           | -0.939303506                     | -0.99479296  | -1.056127677 |
| 0.10                           | -0.997500787                     | -1.060161102 | -1.141624179 |
| 0.12                           | -1.059583902                     | -1.140059479 | -1.233744963 |
| $\Delta G^\ddagger$ (kcal/mol) | 15.00                            | 15.01        | 15.08        |
|                                | <b>15.0</b>                      |              |              |

Figure S11. 1D-EXSY spectra were acquired at three different temperatures (-12, -10 and -7 °C) to derive three rate constants useful for the determination of the energy barrier of compound **5**.

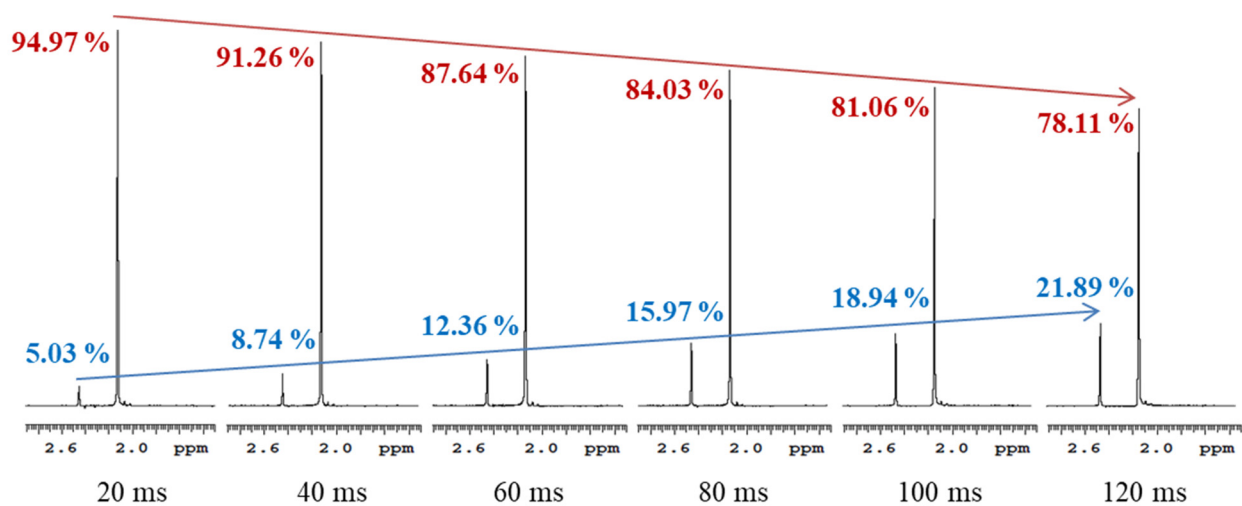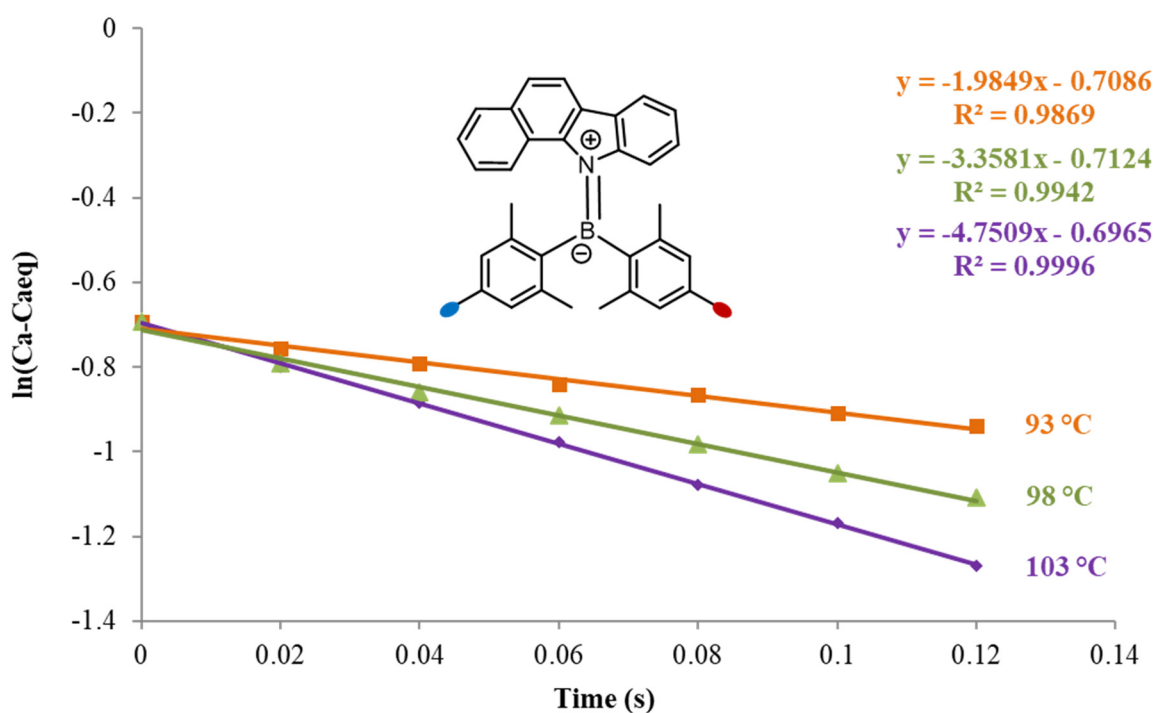

| t (s)                          | T (°C)                |              |              |
|--------------------------------|-----------------------|--------------|--------------|
|                                | 93                    | 98           | 103          |
|                                | <b>ln (Ca - Caeq)</b> |              |              |
| 0                              | -0.693147181          | -0.693147181 | -0.693147181 |
| 0.02                           | -0.756299996          | -0.792083928 | -0.799174585 |
| 0.04                           | -0.792304752          | -0.858257701 | -0.885276678 |
| 0.06                           | -0.841183259          | -0.915041512 | -0.977102871 |
| 0.08                           | -0.86441011           | -0.981896489 | -1.077927697 |
| 0.1                            | -0.908322562          | -1.049536451 | -1.169249368 |
| 0.12                           | -0.93828075           | -1.10714862  | -1.269044801 |
| $\Delta G^\ddagger$ (kcal/mol) | 21.58                 | 21.50        | 21.54        |
|                                | <b>21.5</b>           |              |              |

Figure S12. 1D-EXSY spectra were acquired at three different temperatures (93, 98 and 103 °C) to derive three rate constants useful for the determination of the energy barrier of compound **5**.

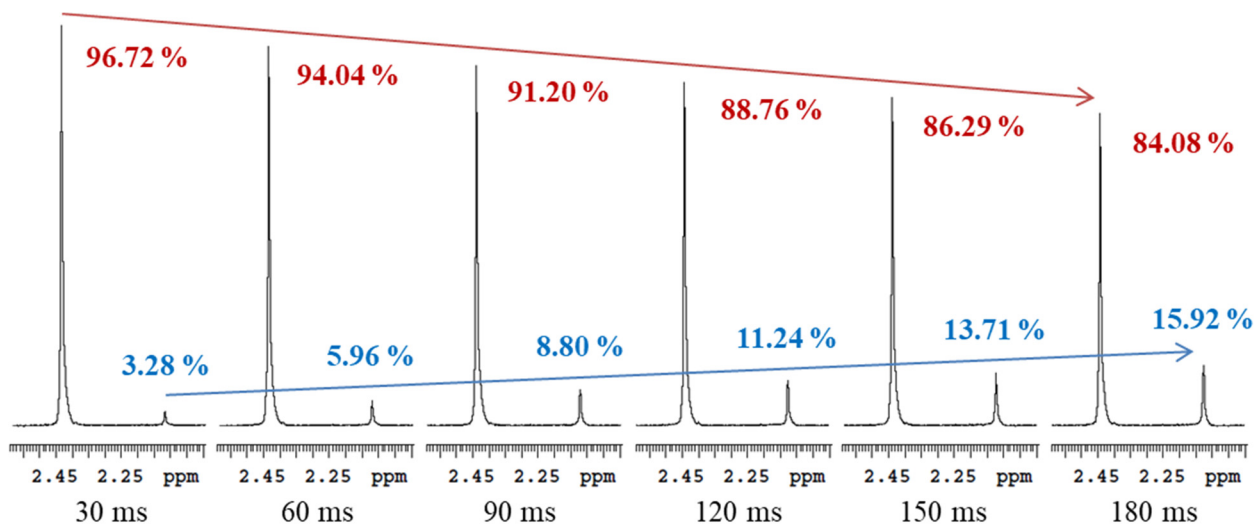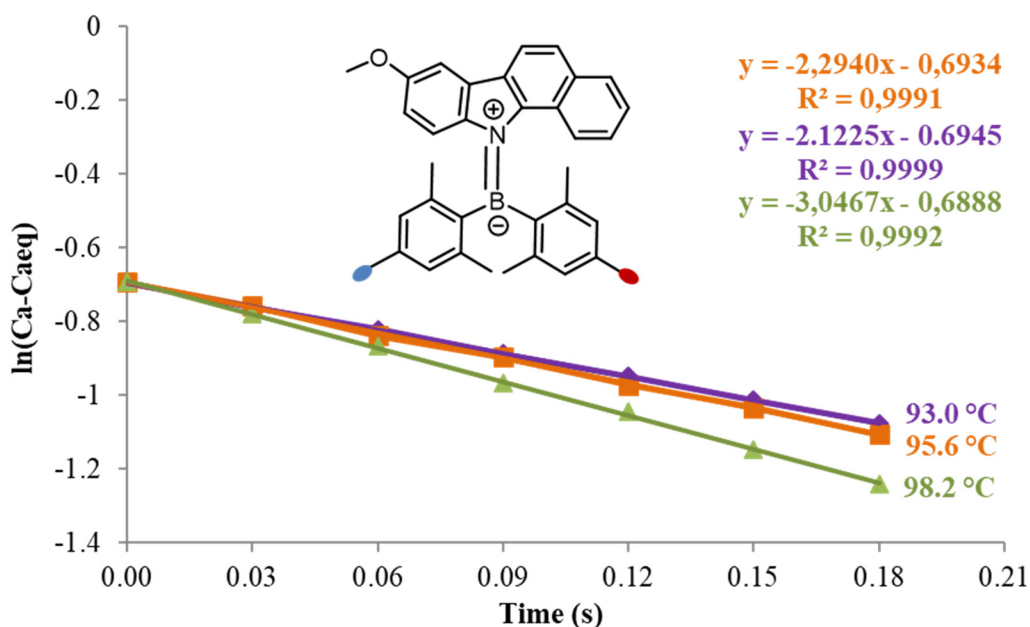

| t (s)                          | T (°C)                      |              |              |
|--------------------------------|-----------------------------|--------------|--------------|
|                                | 93                          | 95.6         | 98.2         |
|                                | ln (Ca - Ca <sub>eq</sub> ) |              |              |
| 0                              | -0.693147181                | -0.693147181 | -0.693147181 |
| 0.03                           | -0.760997847                | -0.757152511 | -0.780013114 |
| 0.06                           | -0.820071874                | -0.838635487 | -0.867500568 |
| 0.09                           | -0.88673193                 | -0.897468978 | -0.966531948 |
| 0.12                           | -0.947781399                | -0.972067747 | -1.044124103 |
| 0.15                           | -1.013627965                | -1.033386504 | -1.14696255  |
| 0.18                           | -1.076459484                | -1.106846094 | -1.242713633 |
| $\Delta G^\ddagger$ (kcal/mol) | 21.53                       | 21.63        | 21.58        |
|                                | <b>21.6</b>                 |              |              |

Figure S13. 1D-EXSY spectra were acquired at three different temperatures (93, 95.6 and 98.2 °C) to derive three rate constants useful for the determination of the energy barrier of compound **7**.

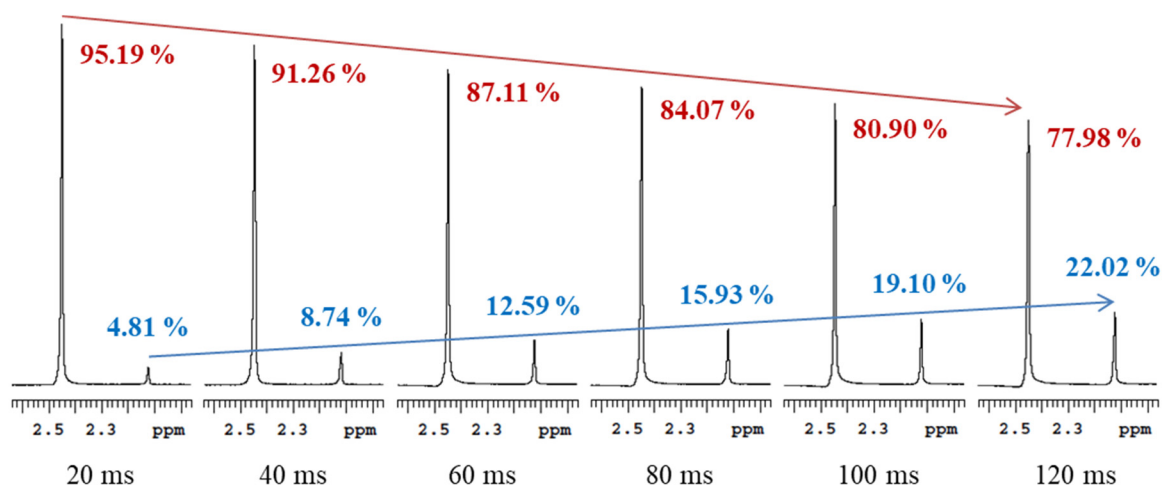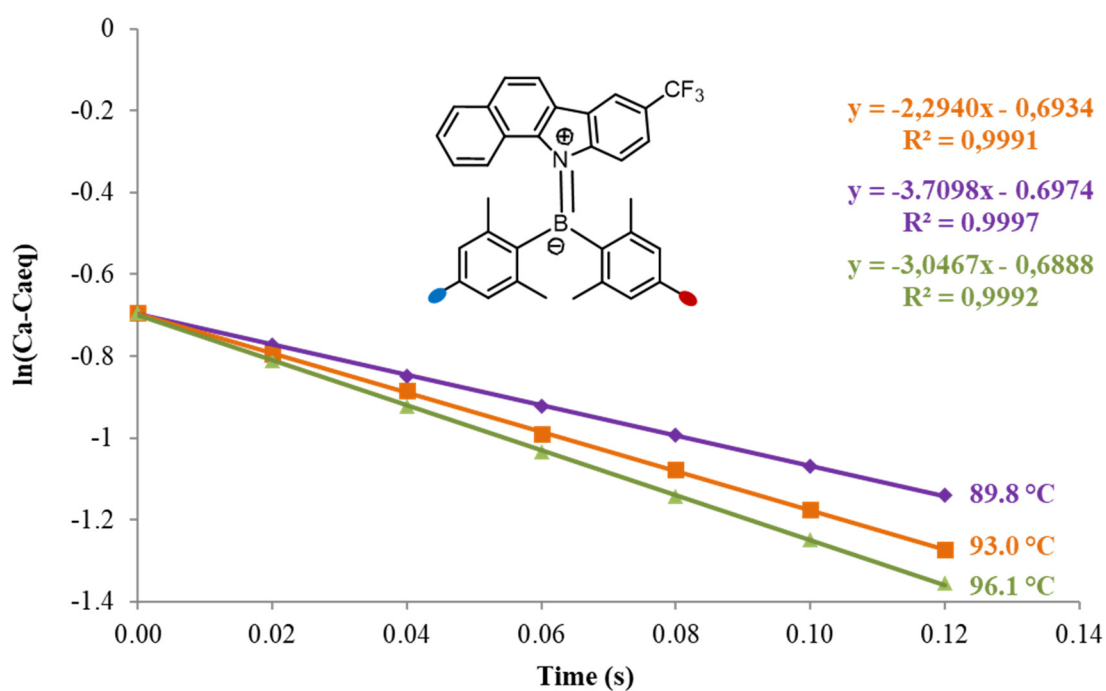

| t (s)                          | T (°C)       |              |              |
|--------------------------------|--------------|--------------|--------------|
|                                | 89.8         | 93           | 96.1         |
| ln (Ca - Caeq)                 |              |              |              |
| 0                              | -0.693147181 | -0.693147181 | -0.693147181 |
| 0.02                           | -0.773489933 | -0.794294363 | -0.809680997 |
| 0.04                           | -0.849333264 | -0.885276678 | -0.923063616 |
| 0.06                           | -0.921303274 | -0.991283711 | -1.033105486 |
| 0.08                           | -0.993711879 | -1.076752954 | -1.141937413 |
| 0.1                            | -1.068277089 | -1.174414002 | -1.248621556 |
| 0.12                           | -1.140998005 | -1.273680217 | -1.355183366 |
| $\Delta G^\ddagger$ (kcal/mol) | 20.93        | 20.94        | 21.02        |
|                                | <b>21.0</b>  |              |              |

Figure S14. 1D-EXSY spectra were acquired at three different temperatures (89.9, 93.0 and 96.1 °C) to derive three rate constants useful for the determination of the energy barrier of compound **8**.

Table S1. Photophysical data summary for compounds **2–8**

| Compd       | Solvent | $\Delta\theta_{s1}^{q-GSeq}$<br>calc. (°) | Stokes Shift<br>calc. (eV) | Stokes Shift<br>sper. (eV) | $\Delta E_{\text{abs}}$<br>$E_4-E_3$ | $\Delta E_{\text{emi}}$<br>$E_6-E_7$ | $\Delta E-S^1$<br>$E_4-E_6$ (eV) | $\Delta E-S^0$<br>$E_7-E_3$ (eV) |
|-------------|---------|-------------------------------------------|----------------------------|----------------------------|--------------------------------------|--------------------------------------|----------------------------------|----------------------------------|
| <b>2a</b>   | HEX     | 33.3                                      | 1.39                       | 1.07                       | 4.27                                 | 2.88                                 | 0.89                             | 0.50                             |
|             | THF     | 32.4                                      | 1.66                       | 1.23                       | 4.30                                 | 2.64                                 | 1.11                             | 0.55                             |
|             | ACN     | 31.9                                      | 1.77                       | 1.32                       | 4.32                                 | 2.54                                 | 1.20                             | 0.58                             |
| <b>2a-E</b> | HEX     | 32.9                                      | 1.44                       | /                          | 4.28                                 | 2.83                                 | 0.92                             | 0.52                             |
|             | THF     | 31.9                                      | 1.71                       | /                          | 4.29                                 | 2.58                                 | 1.15                             | 0.57                             |
|             | ACN     | 31.8                                      | 1.84                       | /                          | 4.31                                 | 2.47                                 | 1.24                             | 0.60                             |
| <b>2a-Z</b> | HEX     | 33.2                                      | 1.44                       | /                          | 4.26                                 | 2.83                                 | 0.91                             | 0.52                             |
|             | THF     | 32.4                                      | 1.72                       | /                          | 4.29                                 | 2.57                                 | 1.15                             | 0.57                             |
|             | ACN     | 31.9                                      | 1.83                       | /                          | 4.31                                 | 2.47                                 | 1.24                             | 0.60                             |
| <b>3</b>    | HEX     | 34.8                                      | 1.52                       | 1.11                       | 4.16                                 | 2.64                                 | 0.94                             | 0.58                             |
|             | THF     | 33.7                                      | 1.86                       | 1.31                       | 4.19                                 | 2.33                                 | 1.22                             | 0.65                             |
|             | ACN     | 33.4                                      | 2.00                       | 1.41                       | 4.22                                 | 2.21                                 | 1.32                             | 0.68                             |
| <b>4</b>    | HEX     | 29.1                                      | 1.21                       | 0.95                       | 4.25                                 | 3.04                                 | 0.74                             | 0.47                             |
|             | THF     | 28.1                                      | 1.47                       | 1.12                       | 4.26                                 | 2.79                                 | 0.96                             | 0.51                             |
|             | ACN     | 28.1                                      | 1.60                       | 1.22                       | 4.29                                 | 2.69                                 | 1.07                             | 0.54                             |
| <b>5</b>    | HEX     | 27.0                                      | 1.10                       | 0.96                       | 3.89                                 | 2.80                                 | 0.68                             | 0.40                             |
|             | THF     | 25.6                                      | 1.38                       | 1.01                       | 3.91                                 | 2.52                                 | 0.92                             | 0.46                             |
|             | ACN     | 24.2                                      | 1.52                       | 1.17                       | 3.92                                 | 2.40                                 | 1.02                             | 0.50                             |
| <b>6</b>    | HEX     | 27.3                                      | 1.09                       | 0.96                       | 3.89                                 | 2.79                                 | 0.69                             | 0.40                             |
|             | THF     | 25.4                                      | 1.36                       | 1.02                       | 3.90                                 | 2.53                                 | 0.91                             | 0.46                             |
|             | ACN     | 24.9                                      | 1.50                       | 1.23                       | 3.91                                 | 2.41                                 | 1.01                             | 0.49                             |
| <b>7</b>    | HEX     | 27.6                                      | 1.13                       | 1.01                       | 3.87                                 | 2.76                                 | 0.71                             | 0.41                             |
|             | THF     | 26.4                                      | 1.42                       | 1.04                       | 3.89                                 | 2.46                                 | 0.95                             | 0.47                             |
|             | ACN     | 25.8                                      | 1.55                       | 1.24                       | 3.90                                 | 2.34                                 | 1.05                             | 0.51                             |
| <b>8</b>    | HEX     | 24.9                                      | 1.02                       | 0.78                       | 3.91                                 | 2.90                                 | 0.62                             | 0.40                             |
|             | THF     | 23.3                                      | 1.34                       | 0.97                       | 3.94                                 | 2.59                                 | 0.88                             | 0.46                             |
|             | ACN     | 22.5                                      | 1.49                       | 1.05                       | 3.95                                 | 2.46                                 | 0.99                             | 0.50                             |



Table S2. Photophysical data summary for compound **2–8**

| Compd       | Solvent | $\Delta E\text{-abs}$<br>E <sub>4</sub> -E <sub>3</sub> | $\Delta E\text{-emi}$<br>E <sub>6</sub> -E <sub>7</sub> | $\Delta E\text{-S}^1$<br>E <sub>4</sub> -E <sub>6</sub> (eV) | $\Delta E\text{-S}^0$<br>E <sub>7</sub> -E <sub>3</sub> (eV) |
|-------------|---------|---------------------------------------------------------|---------------------------------------------------------|--------------------------------------------------------------|--------------------------------------------------------------|
| <b>2a</b>   | HEX     | 4.27                                                    | 2.88                                                    | 0.89                                                         | 0.50                                                         |
|             | THF     | 4.30                                                    | 2.64                                                    | 1.11                                                         | 0.55                                                         |
|             | ACN     | 4.32                                                    | 2.54                                                    | 1.20                                                         | 0.58                                                         |
| <b>2b-E</b> | HEX     | 4.28                                                    | 2.83                                                    | 0.92                                                         | 0.52                                                         |
|             | THF     | 4.29                                                    | 2.58                                                    | 1.15                                                         | 0.57                                                         |
|             | ACN     | 4.31                                                    | 2.47                                                    | 1.24                                                         | 0.60                                                         |
| <b>2b-Z</b> | HEX     | 4.26                                                    | 2.83                                                    | 0.91                                                         | 0.52                                                         |
|             | THF     | 4.29                                                    | 2.57                                                    | 1.15                                                         | 0.57                                                         |
|             | ACN     | 4.31                                                    | 2.47                                                    | 1.24                                                         | 0.60                                                         |
| <b>3</b>    | HEX     | 4.16                                                    | 2.64                                                    | 0.94                                                         | 0.58                                                         |
|             | THF     | 4.19                                                    | 2.33                                                    | 1.22                                                         | 0.65                                                         |
|             | ACN     | 4.22                                                    | 2.21                                                    | 1.32                                                         | 0.68                                                         |
| <b>4</b>    | HEX     | 4.25                                                    | 3.04                                                    | 0.74                                                         | 0.47                                                         |
|             | THF     | 4.26                                                    | 2.79                                                    | 0.96                                                         | 0.51                                                         |
|             | ACN     | 4.29                                                    | 2.69                                                    | 1.07                                                         | 0.54                                                         |
| <b>5</b>    | HEX     | 3.89                                                    | 2.80                                                    | 0.68                                                         | 0.40                                                         |
|             | THF     | 3.91                                                    | 2.52                                                    | 0.92                                                         | 0.46                                                         |
|             | ACN     | 3.92                                                    | 2.40                                                    | 1.02                                                         | 0.50                                                         |
| <b>6</b>    | HEX     | 3.89                                                    | 2.79                                                    | 0.69                                                         | 0.40                                                         |
|             | THF     | 3.90                                                    | 2.53                                                    | 0.91                                                         | 0.46                                                         |
|             | ACN     | 3.91                                                    | 2.41                                                    | 1.01                                                         | 0.49                                                         |
| <b>7</b>    | HEX     | 3.87                                                    | 2.76                                                    | 0.71                                                         | 0.41                                                         |
|             | THF     | 3.89                                                    | 2.46                                                    | 0.95                                                         | 0.47                                                         |
|             | ACN     | 3.90                                                    | 2.34                                                    | 1.05                                                         | 0.51                                                         |
| <b>8</b>    | HEX     | 3.91                                                    | 2.90                                                    | 0.62                                                         | 0.40                                                         |
|             | THF     | 3.94                                                    | 2.59                                                    | 0.88                                                         | 0.46                                                         |
|             | ACN     | 3.95                                                    | 2.46                                                    | 0.99                                                         | 0.50                                                         |

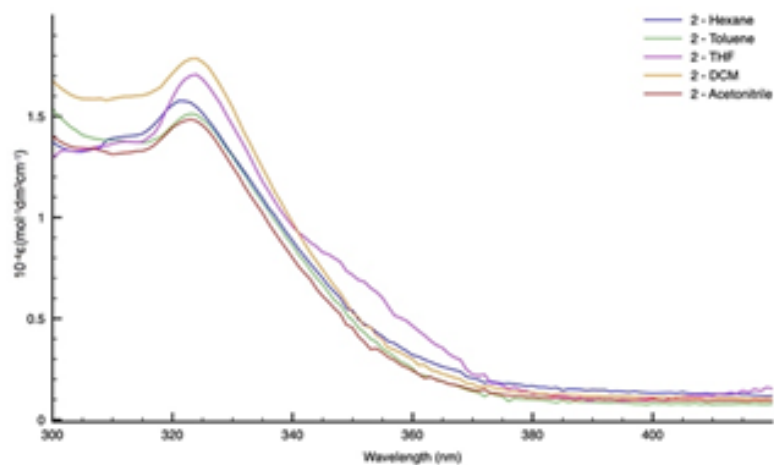

Figure S15: Absorption Profiles of compound **2a**, 298K,  $10^{-5}$  M.

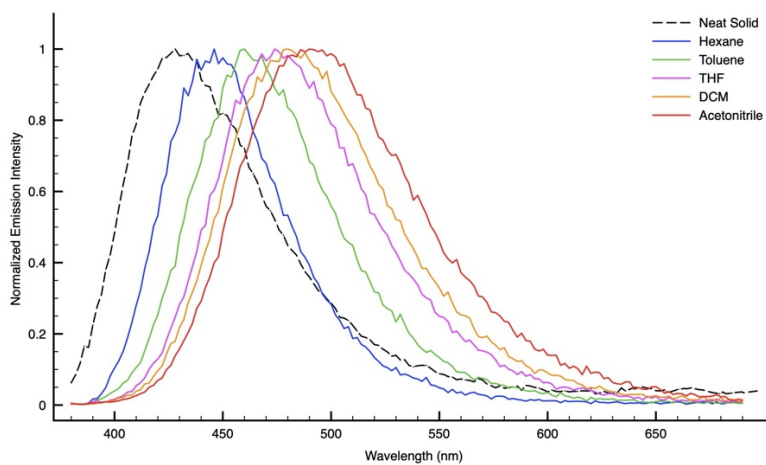

Figure S16: Normalized Emission Profiles of compound **2a**, 298K.

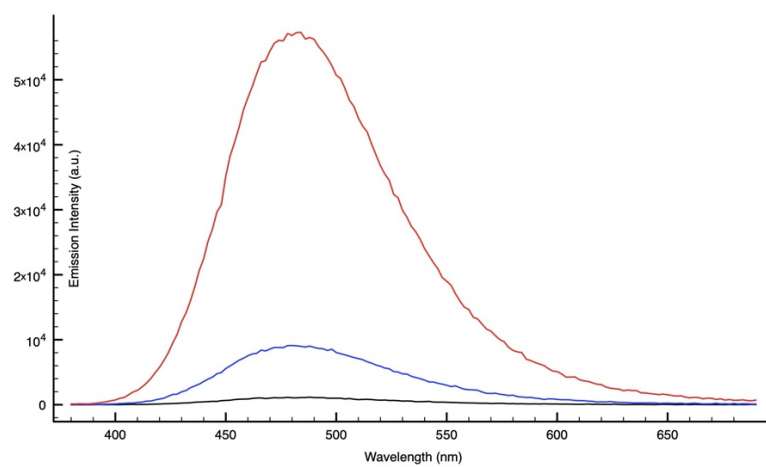

Figure S17: Emission Profiles of compound **2a**,  $10^{-6}$  M (black line),  $10^{-5}$  M (blue line) and  $10^{-4}$  M (red line),  $\text{CH}_2\text{Cl}_2$ ,  $\lambda_{\text{exc}} = 350$  nm, 298K.

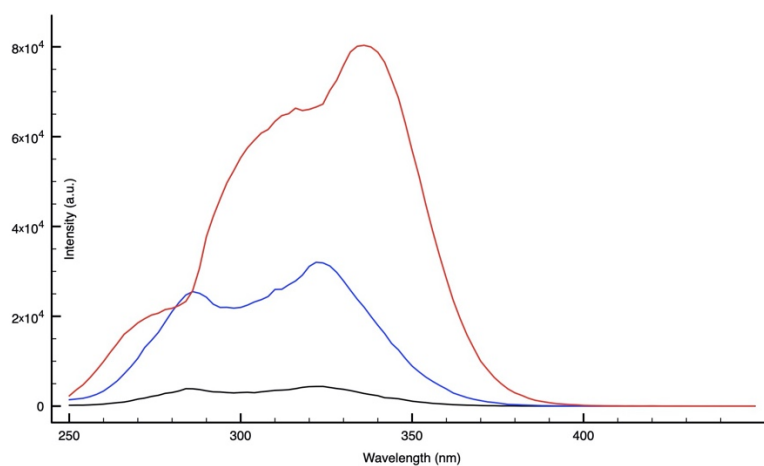

Figure S18: Excitation profiles of compound **2a**,  $10^{-6}$  M (black line),  $10^{-5}$  M (blue line) and  $10^{-4}$  M (red line),  $\text{CH}_2\text{Cl}_2$ ,  $\lambda_{\text{emi}} = 482$  nm, 298K.

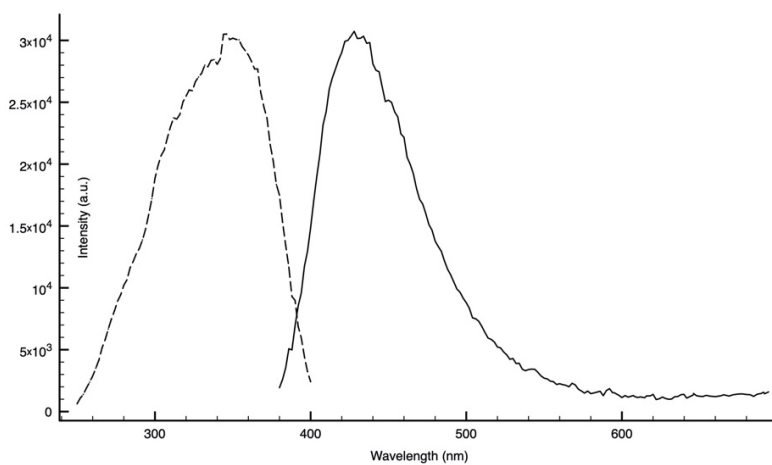

Figure S19: Emission (solid line) and Excitation (dashed line) profiles of compound **2a**, Neat solid Matrix, 298K.

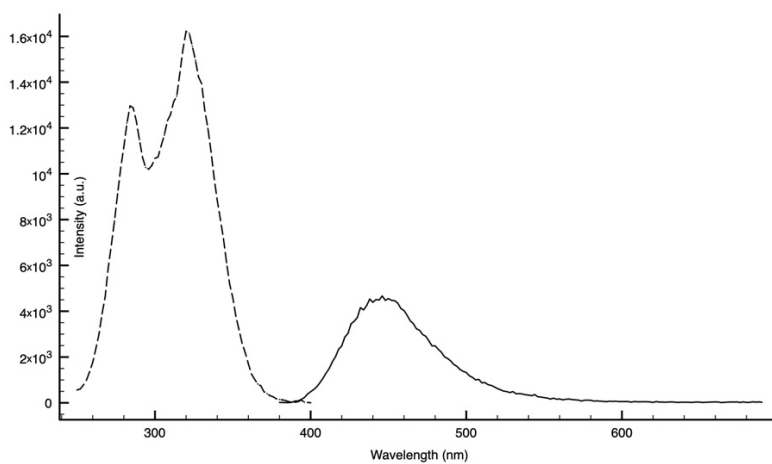

Figure S20: Emission (solid line) and Excitation (dashed line) profiles of compound **2a**,  $10^{-5}$  M Hexane, 298K.

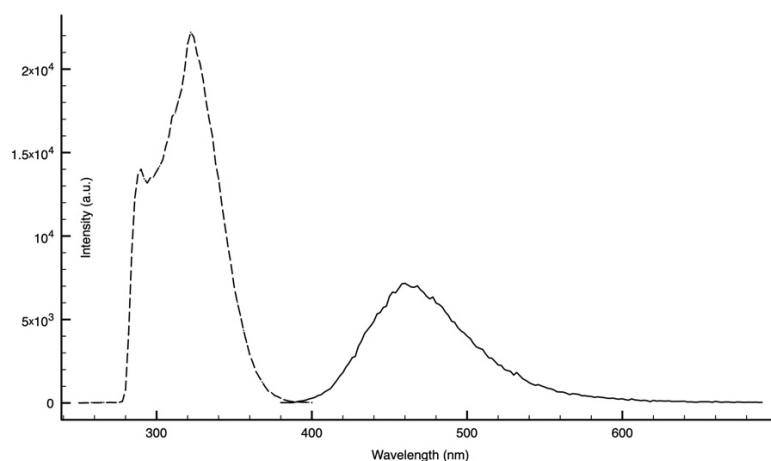

Figure S21: Emission (solid line) and Excitation (dashed line) profiles of compound **2a**, 10<sup>-5</sup> M Toluene, 298K.

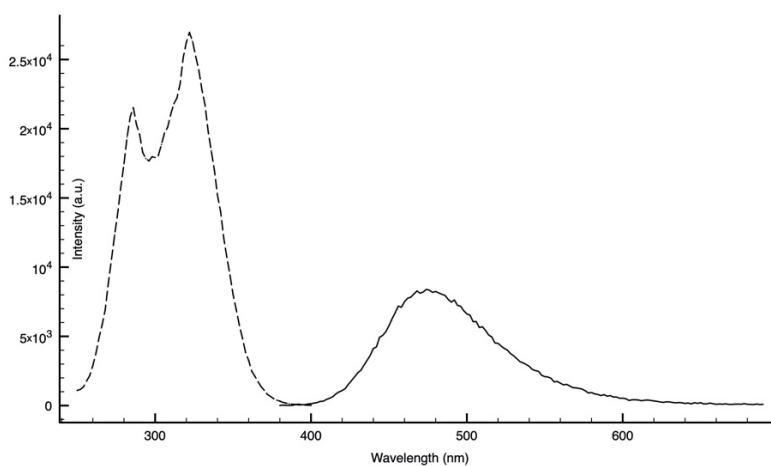

Figure S22: Emission (solid line) and Excitation (dashed line) profiles of compound **2a**, 10<sup>-5</sup> M THF, 298K.

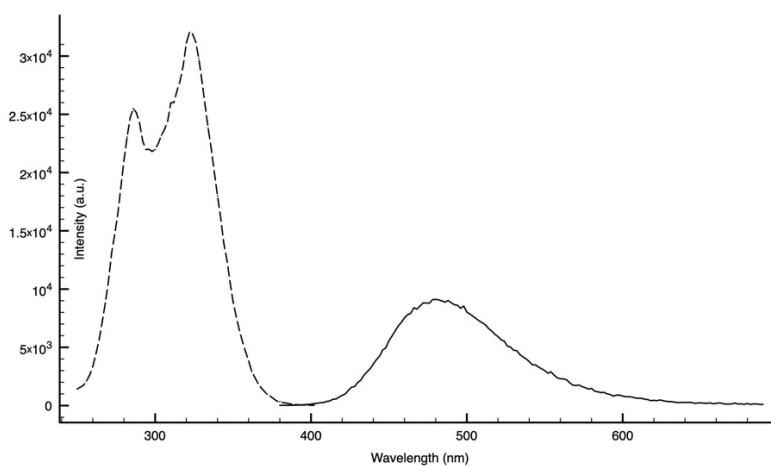

Figure S23: Emission (solid line) and Excitation (dashed line) profiles of compound **2a**, 10<sup>-5</sup> M DCM, 298K.

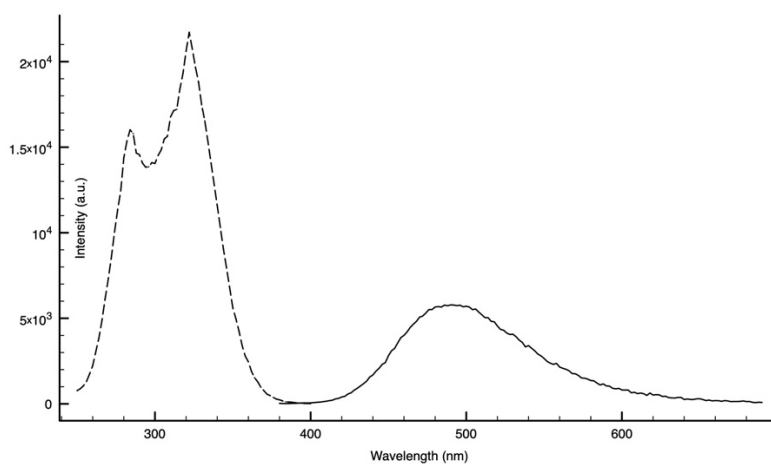

Figure S24: Emission (solid line) and Excitation (dashed line) profiles of compound **2a**,  $10^{-5}$  M Acetonitrile, 298K.

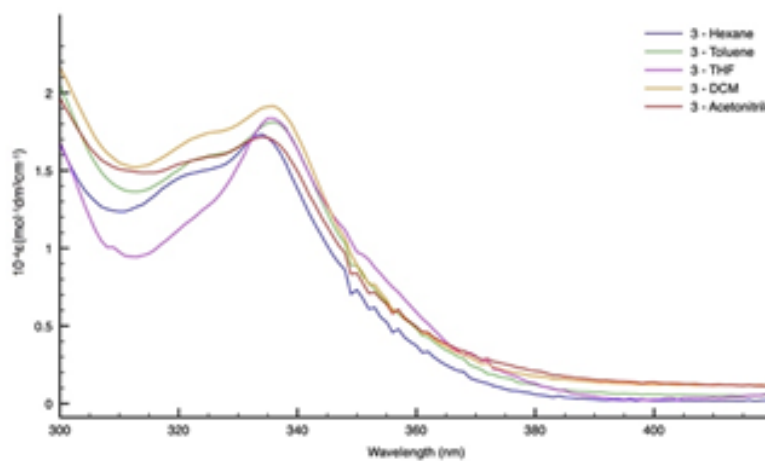

Figure S25: Absorption Profiles of compound **3**, 298 K,  $10^{-5}$  M .

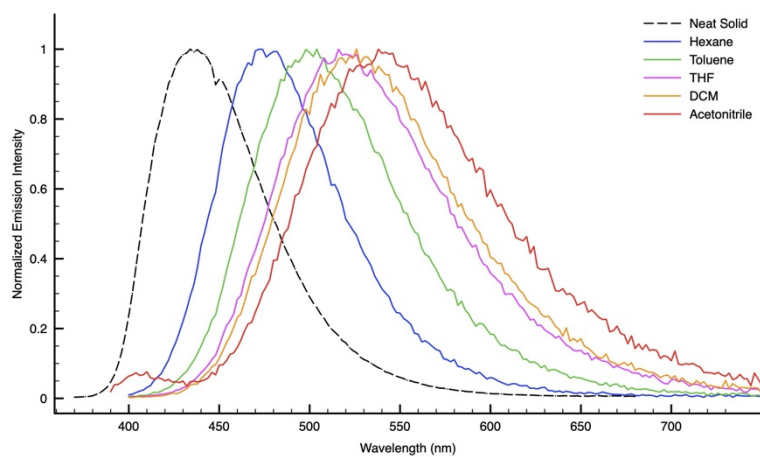

Figure S26: Normalized Emission Profiles of compound **3**, 298K.

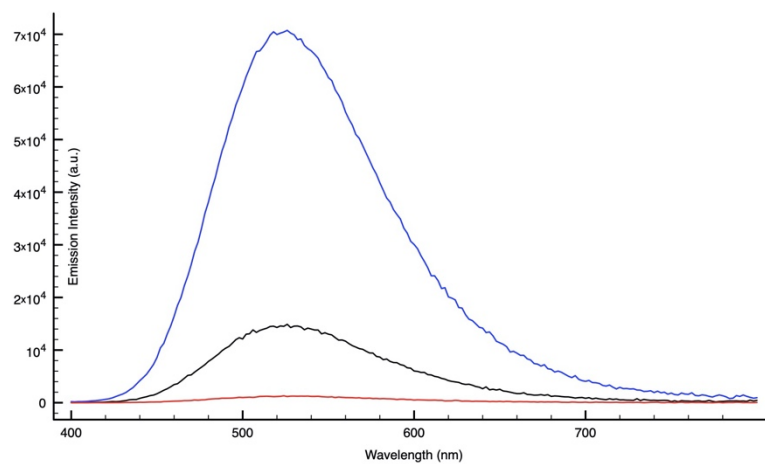

Figure S27: Emission Profiles of compound **3**,  $1.29 \times 10^{-5}$  M (black line),  $1.29 \times 10^{-4}$  M (blue line) and  $12.9 \times 10^{-4}$  M (red line),  $\text{CH}_2\text{Cl}_2$ ,  $\lambda_{\text{exc}} = 350$  nm, 298K.

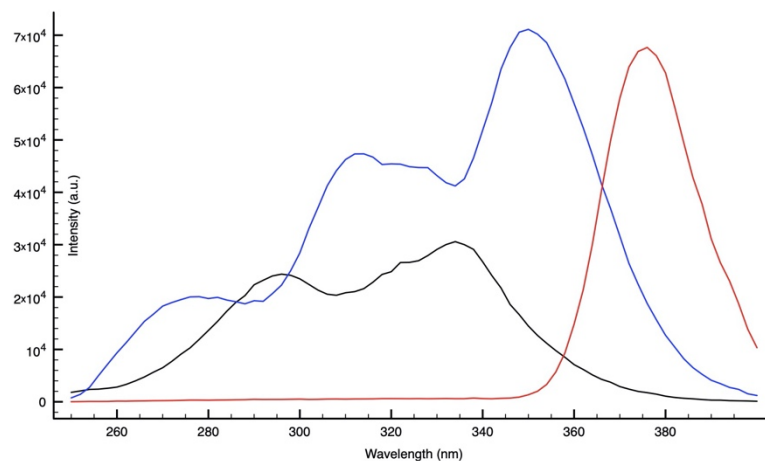

Figure S28: Excitation profiles of compound **3**,  $1.29 \times 10^{-5}$  M (black line),  $1.29 \times 10^{-4}$  M (blue line) and  $12.9 \times 10^{-4}$  M (red line),  $\text{CH}_2\text{Cl}_2$ ,  $\lambda_{\text{emi}} = 524$  nm, 298K.

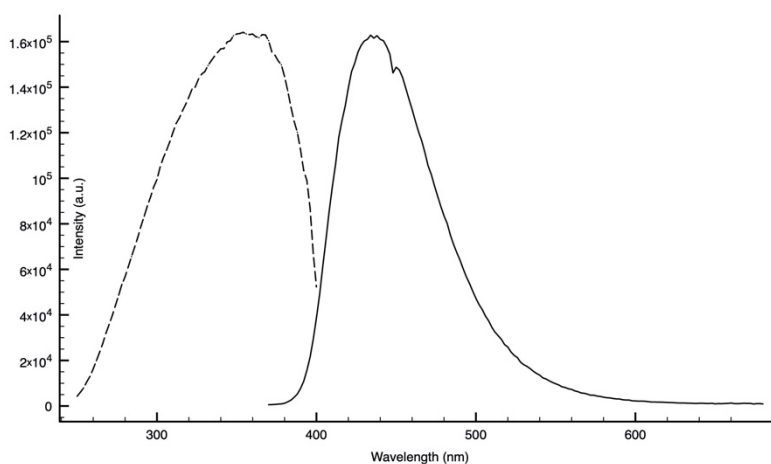

Figure S29: Emission (solid line) and Excitation (dashed line) profiles of compound **3**, Neat solid Matrix, 298K.

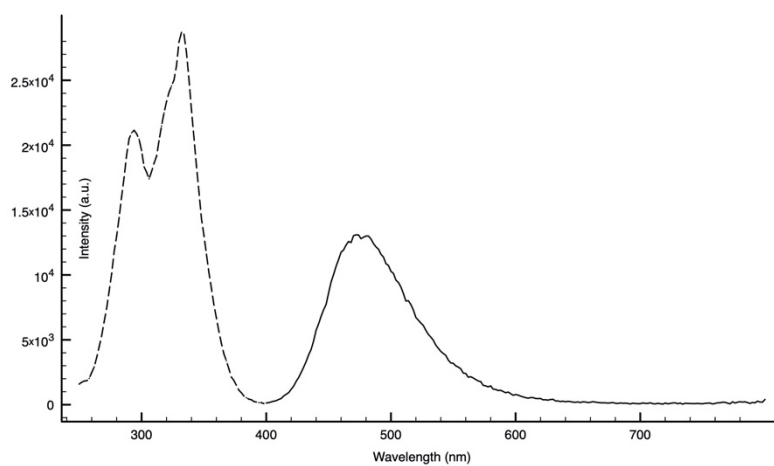

Figure S30: Emission (solid line) and Excitation (dashed line) profiles of compound **3** 10<sup>-5</sup>M, Hexane, 298K.

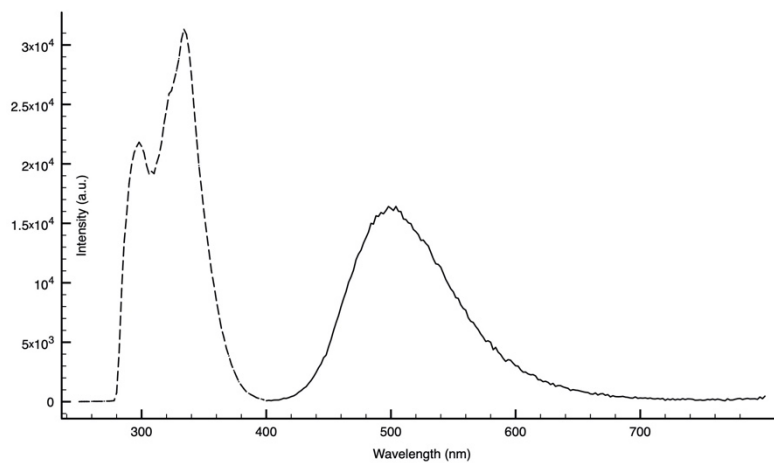

Figure S31: Emission (solid line) and Excitation (dashed line) profiles of compound **3** 10<sup>-5</sup>M, Toluene, 298K.

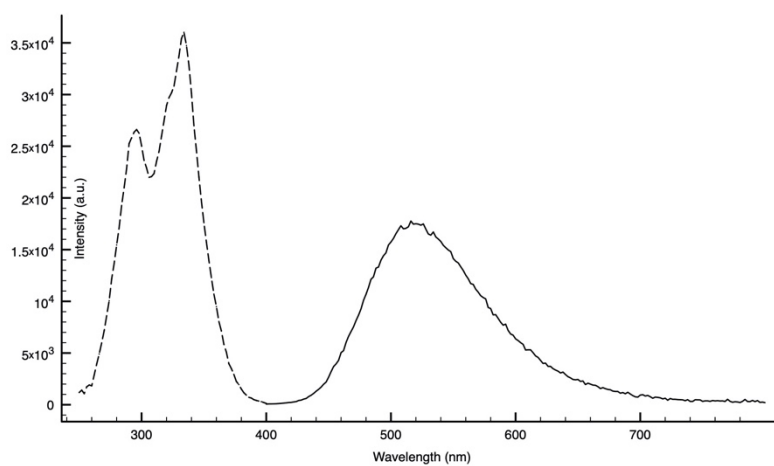

Figure S32: Emission (solid line) and Excitation (dashed line) profiles of compound **3** 10<sup>-5</sup>M, THF, 298K.

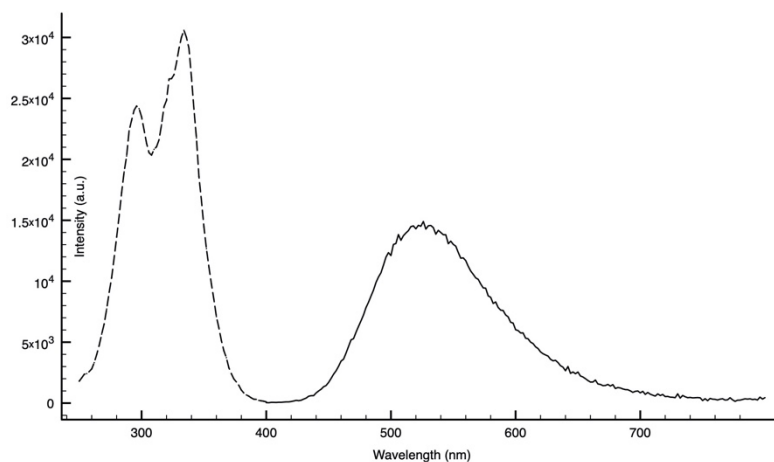

Figure S33: Emission (solid line) and Excitation (dashed line) profiles of compound **3**  $1.29 \times 10^{-4} \text{M}$ , DCM, 298K.

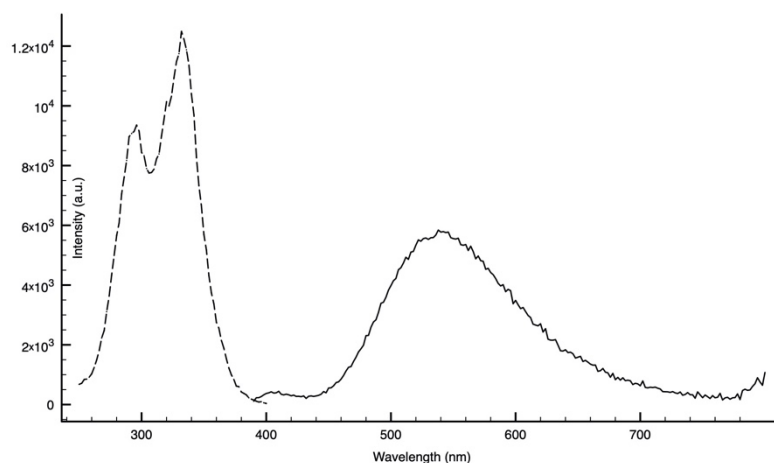

Figure S34: Emission (solid line) and Excitation (dashed line) profiles of compound **3**  $10^{-5} \text{M}$ ,  $\text{CH}_3\text{CN}$ , 298K.

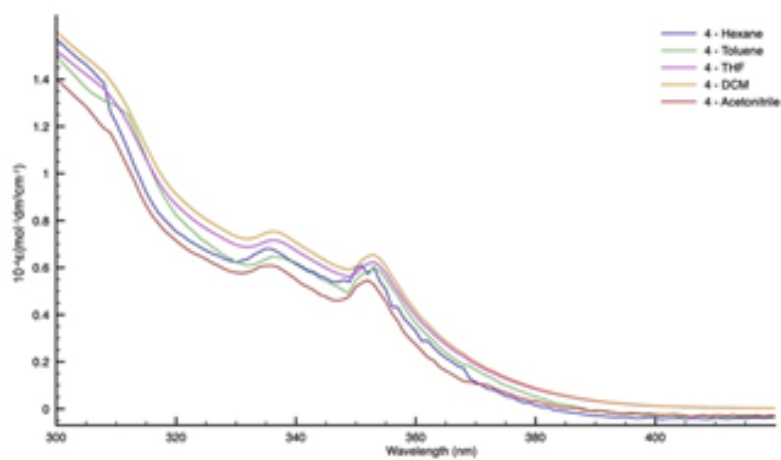

Figure S35: Absorption Profiles of compound **4**, 298 K,  $10^{-5} \text{M}$ .



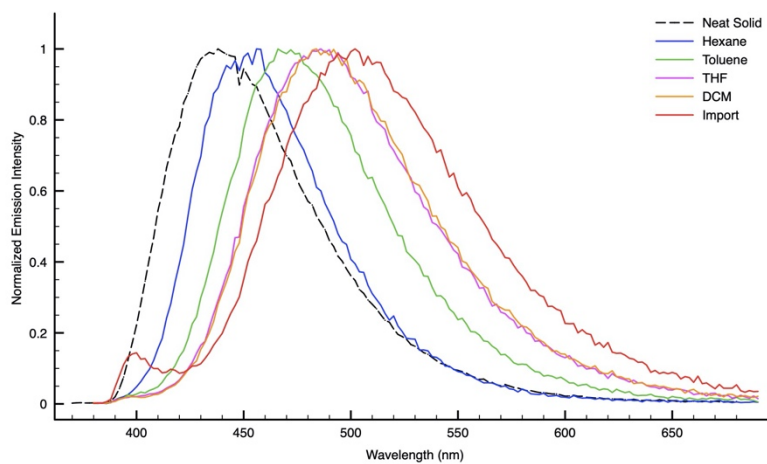

Figure S36: Normalized Emission Profiles of compound **4**, 298K.

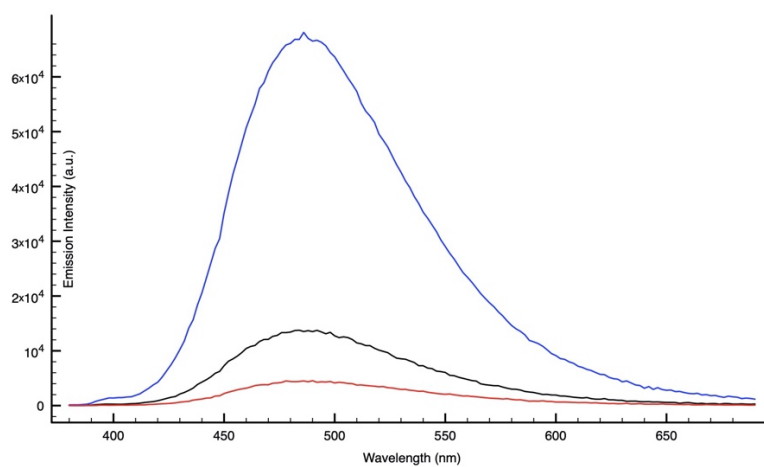

Figure S37: Emission Profiles of compound **4**,  $10^{-6}$  M (black line),  $10^{-5}$  M (blue line) and  $10^{-4}$  M (red line),  $\text{CH}_2\text{Cl}_2$ ,  $\lambda_{\text{exc}} = 350$  nm, 298K.

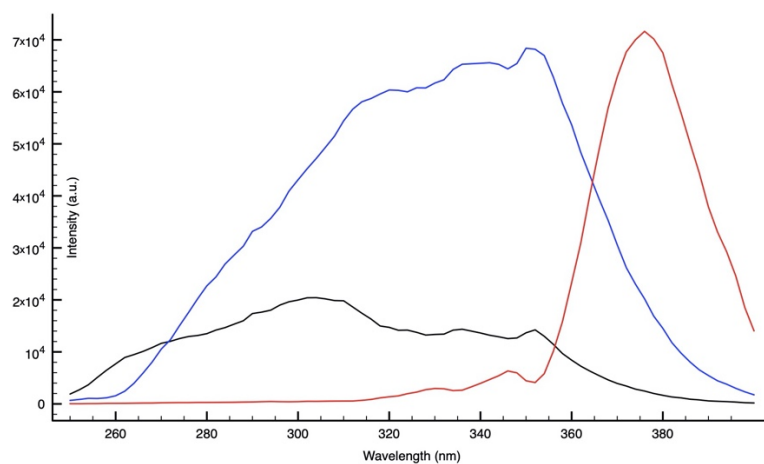

Figure S38: Excitation profiles of compound **4**,  $10^{-6}$  M (black line),  $10^{-5}$  M (blue line) and  $10^{-4}$  M (red line),  $\text{CH}_2\text{Cl}_2$ ,  $\lambda_{\text{emi}} = 438$  nm, 298K.

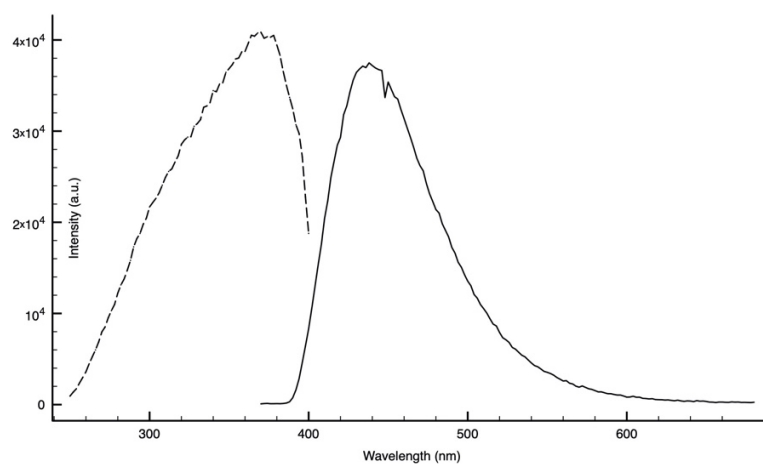

Figure S39: Emission (solid line) and Excitation (dashed line) profiles of compound **4**, Neat solid Matrix, 298K.

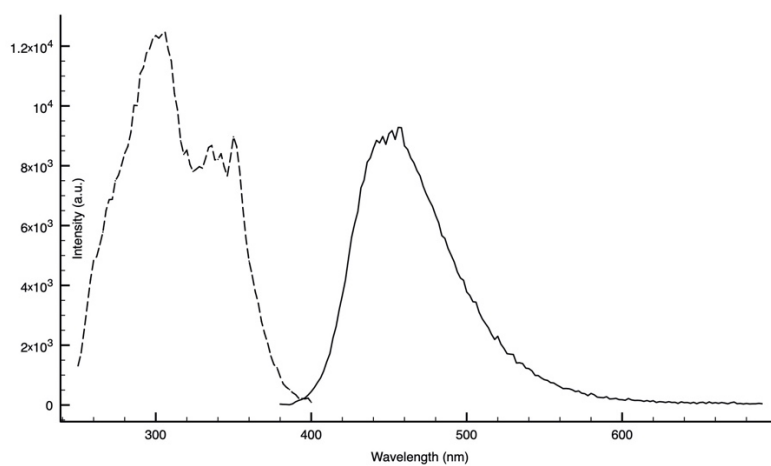

Figure S40: Emission (solid line) and Excitation (dashed line) profiles of compound **4**,  $10^{-5}$  M Hexane, 298K.

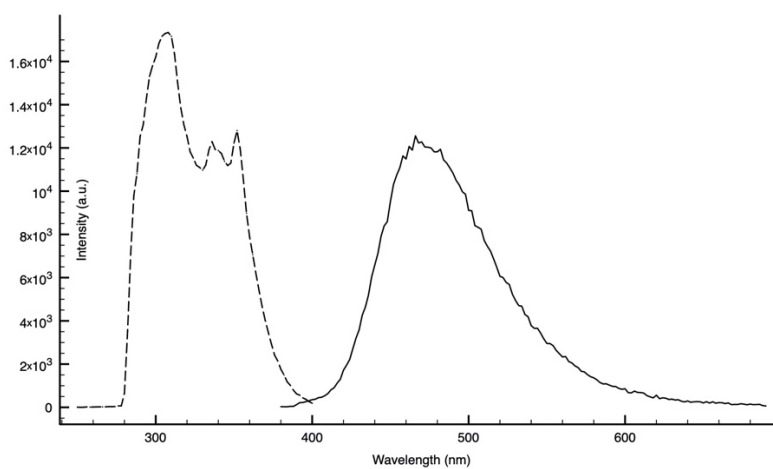

Figure 41: Emission (solid line) and Excitation (dashed line) profiles of compound **4**,  $10^{-5}$  M Toluene, 298K.

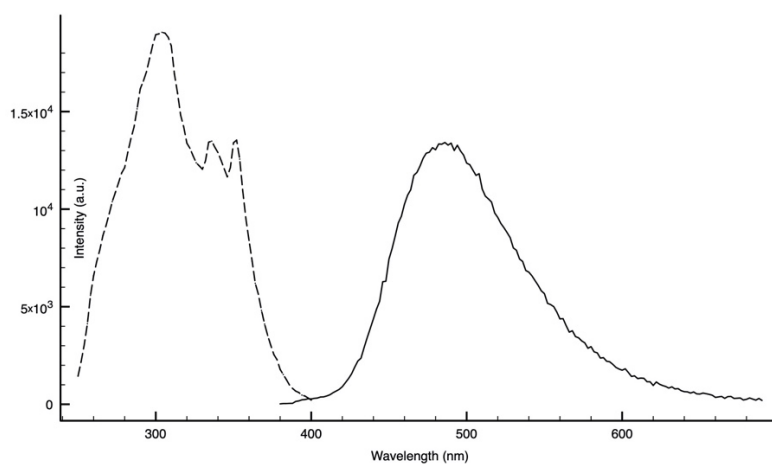

Figure S42: Emission (solid line) and Excitation (dashed line) profiles of compound **4**, 10<sup>-5</sup> M THF, 298K.

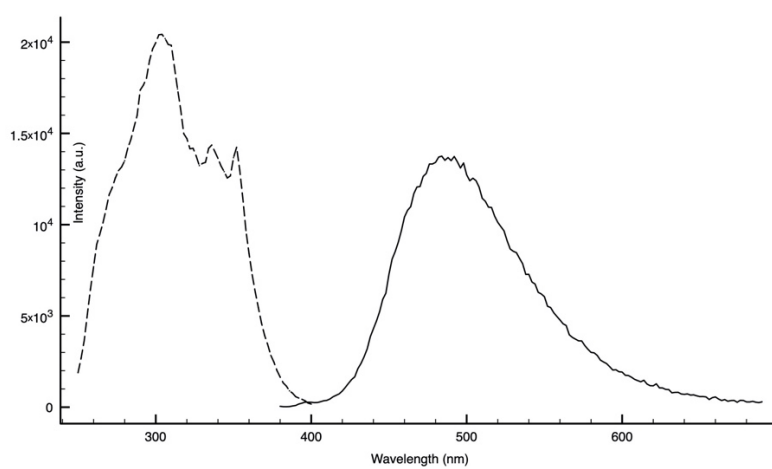

Figure S43: Emission (solid line) and Excitation (dashed line) profiles of compound **4** 10<sup>-5</sup> M DCM, 298K.

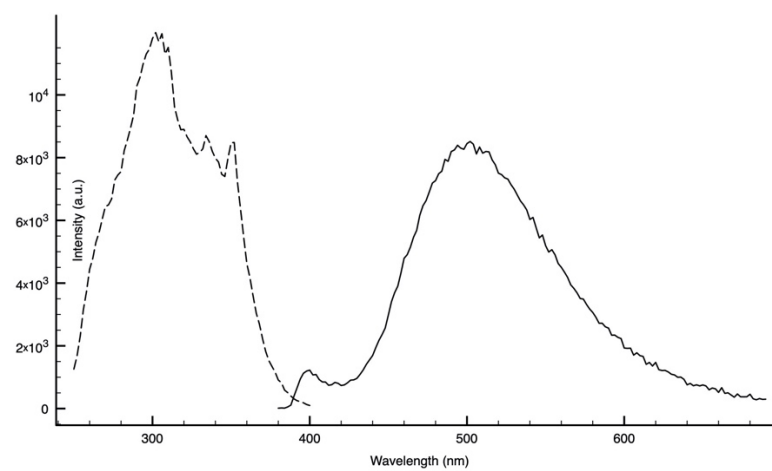

Figure S44: Emission (solid line) and Excitation (dashed line) profiles of compound **4**, 10<sup>-5</sup> M Acetonitrile, 298K.

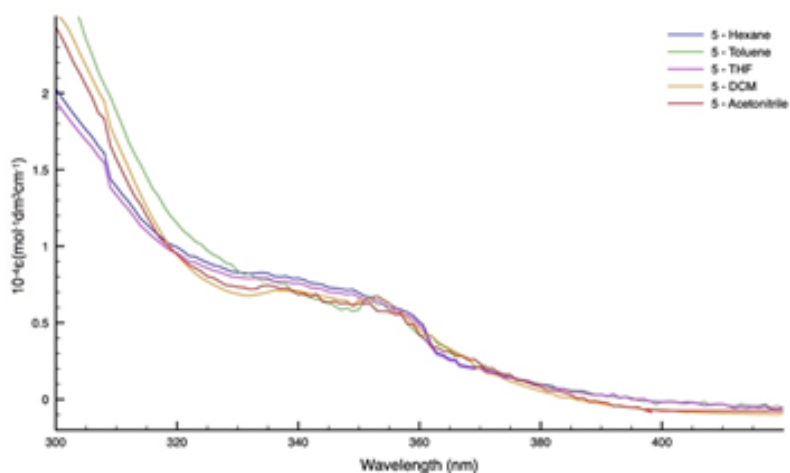

Figure S45: Absorption Profiles of compound **5**, 298 K,  $10^{-5}$  M.

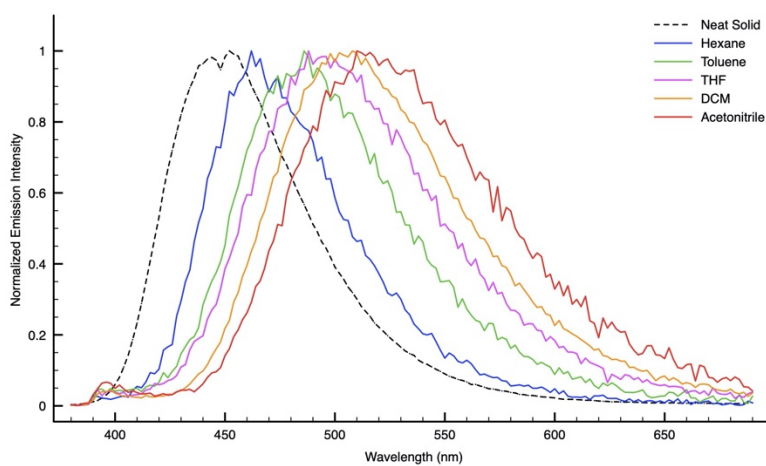

Figure S46: Normalized Emission Profiles of compound **5**, 298K.

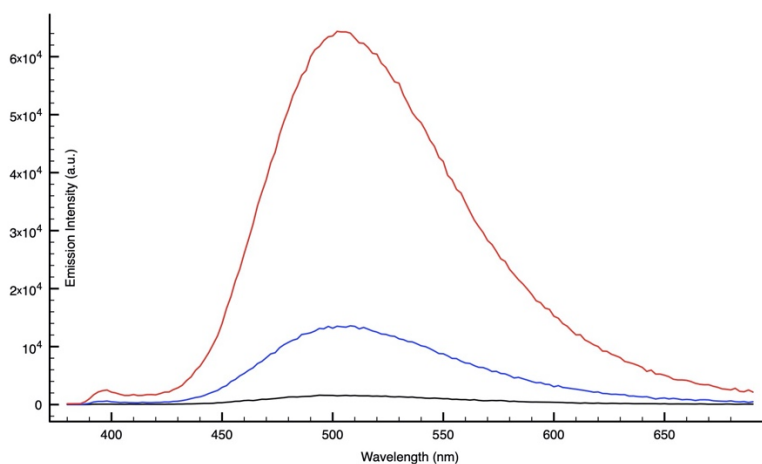

Figure S47: Emission Profiles of compound **5**,  $10^{-6}$  M (black line),  $10^{-5}$  M (blue line) and  $10^{-4}$  M (red line),  $\text{CH}_2\text{Cl}_2$ ,  $\lambda_{\text{exc}} = 350$  nm, 298K.

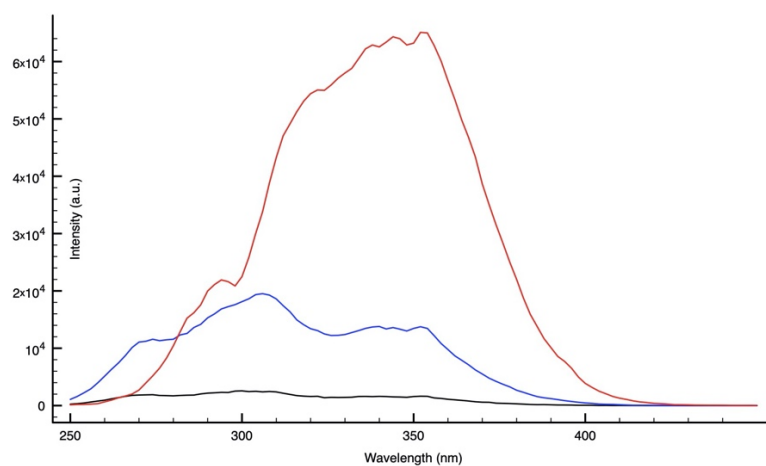

Figure S48: Excitation profiles of compound **5**,  $10^{-6}$  M (black line),  $10^{-5}$  M (blue line) and  $10^{-4}$  M (red line),  $\text{CH}_2\text{Cl}_2$ ,  $\lambda_{\text{emi}} = 504$  nm, 298K.

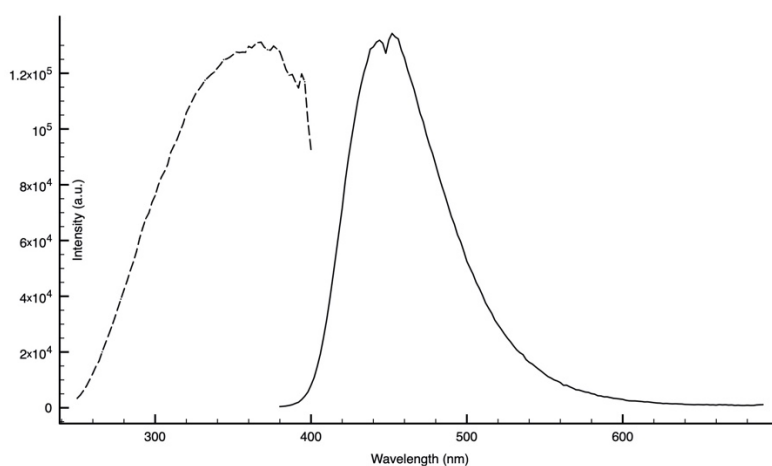

Figure S49: Emission (solid line) and Excitation (dashed line) profiles of compound **5**, Neat solid Matrix, 298K.

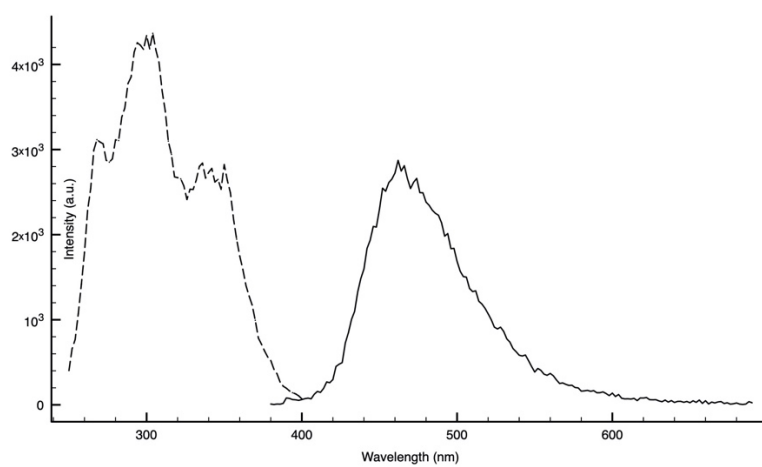

Figure S50: Emission (solid line) and Excitation (dashed line) profiles of compound **5**,  $10^{-5}$  M Hexane, 298K.

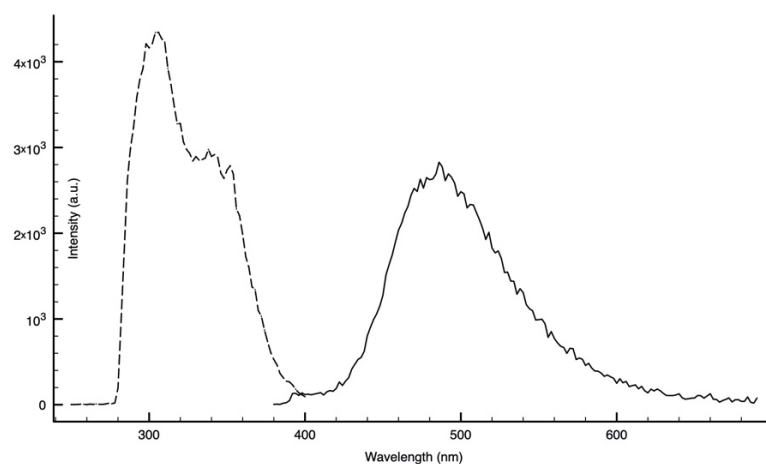

Figure S51: Emission (solid line) and Excitation (dashed line) profiles of compound **5**, 10<sup>-5</sup> M Toluene, 298K.

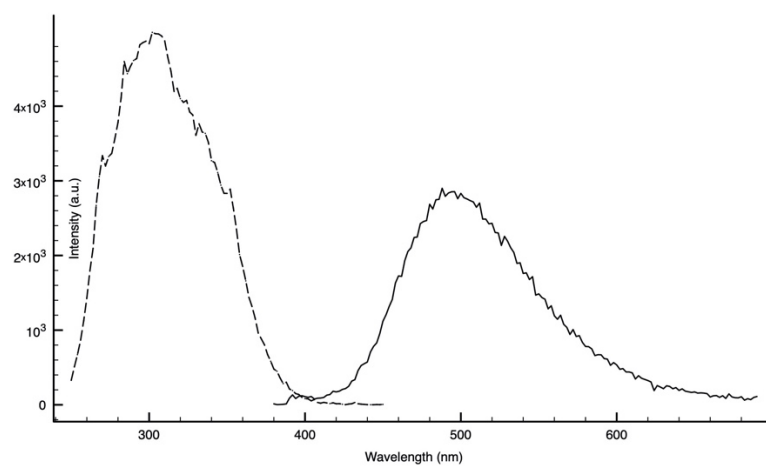

Figure S52: Emission (solid line) and Excitation (dashed line) profiles of compound **5**, 10<sup>-5</sup> M THF, 298K.

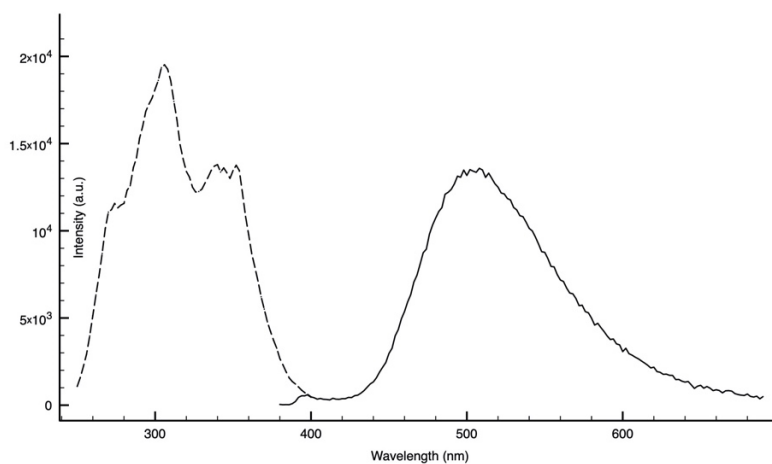

Figure S53: Emission (solid line) and Excitation (dashed line) profiles of compound **5**, 10<sup>-5</sup> M DCM, 298K.

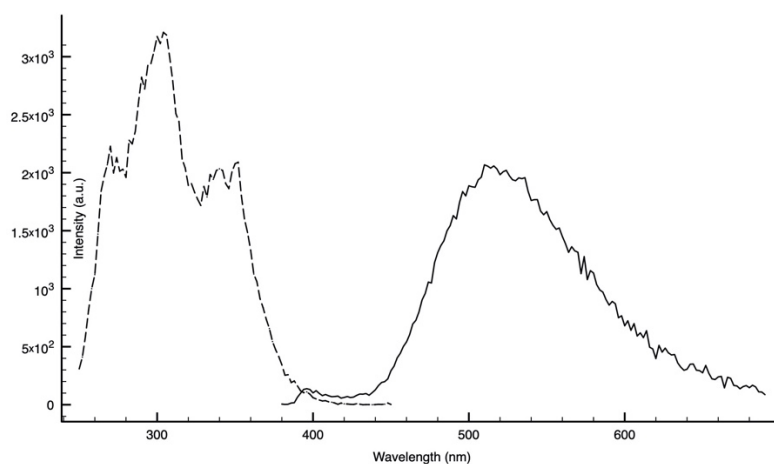

Figure S54: Emission (solid line) and Excitation (dashed line) profiles of compound **5**,  $10^{-5}$  M Acetonitrile, 298K.

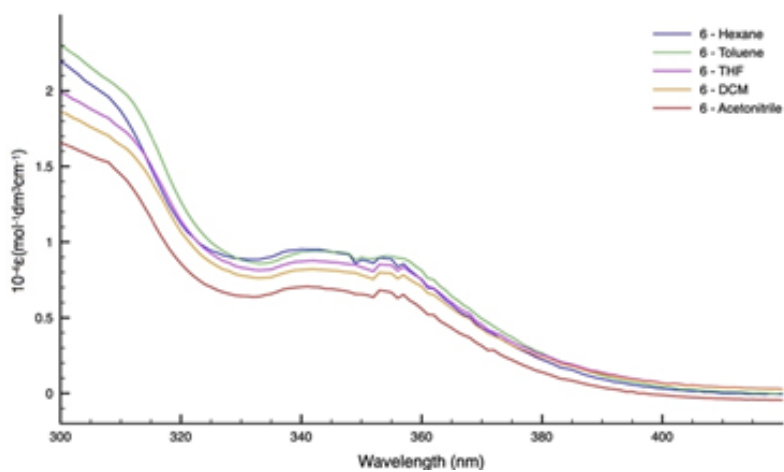

Figure S55: Absorption Profiles of compound **6**, 298 K,  $10^{-5}$  M.

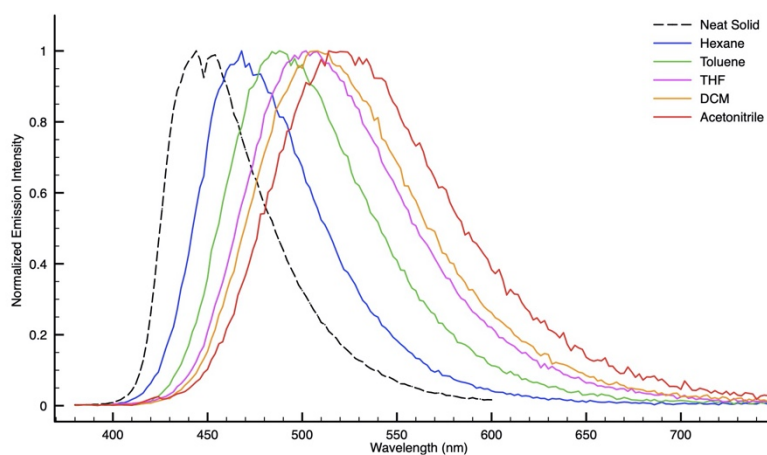

Figure S56: Normalized Emission Profiles of compound **6**, 298K.

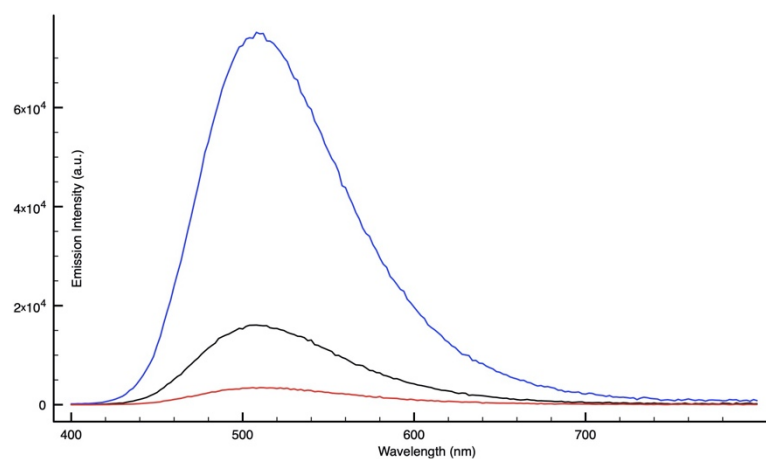

Figure S57: Emission Profiles of compound **6**,  $7.02 \cdot 10^{-6}$  M (black line),  $7.02 \cdot 10^{-5}$  M (blue line) and  $7.02 \cdot 10^{-4}$  M (red line),  $\text{CH}_2\text{Cl}_2$ ,  $\lambda_{\text{exc}} = 350$  nm, 298K.

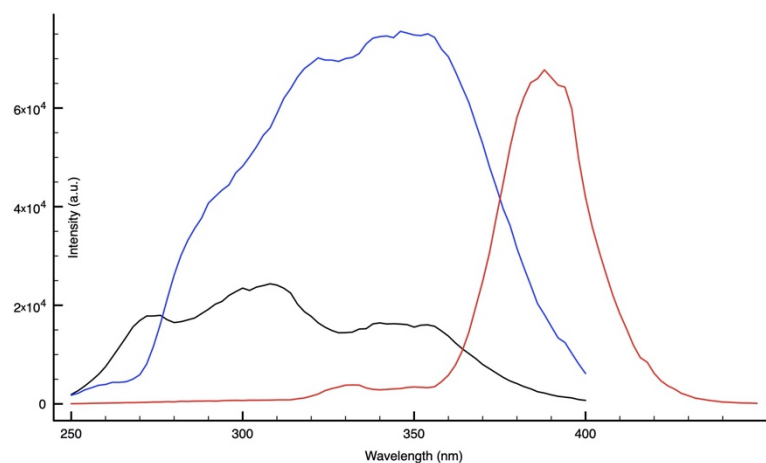

Figure S58: Excitation Profiles of compound **6**,  $7.02 \cdot 10^{-6}$  M (black line),  $7.02 \cdot 10^{-5}$  M (blue line) and  $7.02 \cdot 10^{-4}$  M (red line),  $\text{CH}_2\text{Cl}_2$ ,  $\lambda_{\text{emi}} = 510$  nm, 298K.

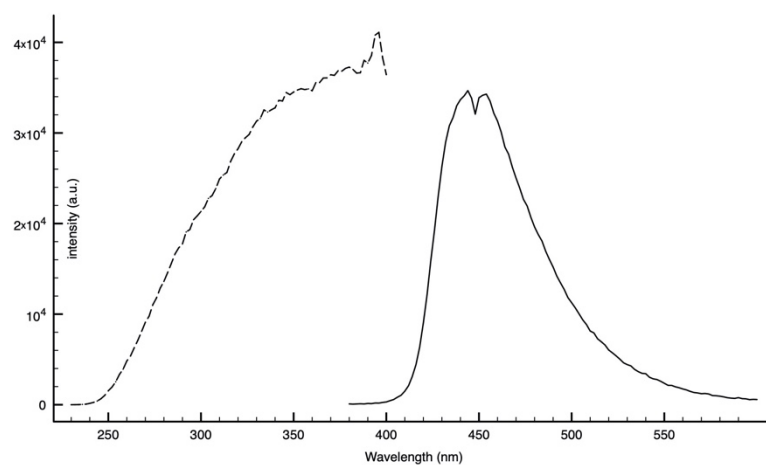

Figure S59: Emission (solid line) and Excitation (dashed line) profiles of compound **6**, Neat solid Matrix, 298K.



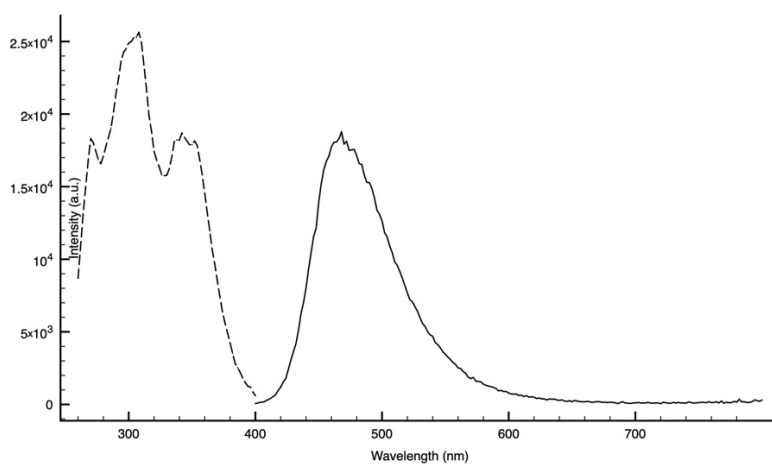

Figure S60: Emission (solid line) and Excitation (dashed line) profiles of compound **6**  $10^{-5}$  M, Hexane, 298K.

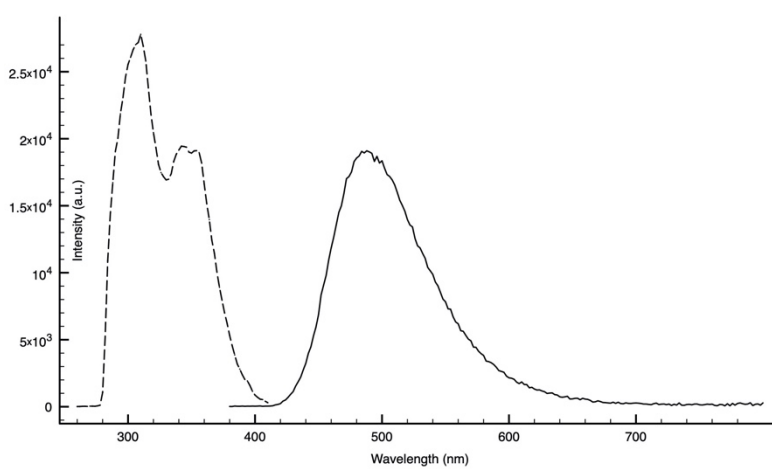

Figure S61: Emission (solid line) and Excitation (dashed line) profiles of compound **6**  $10^{-5}$  M, Toluene, 298K.

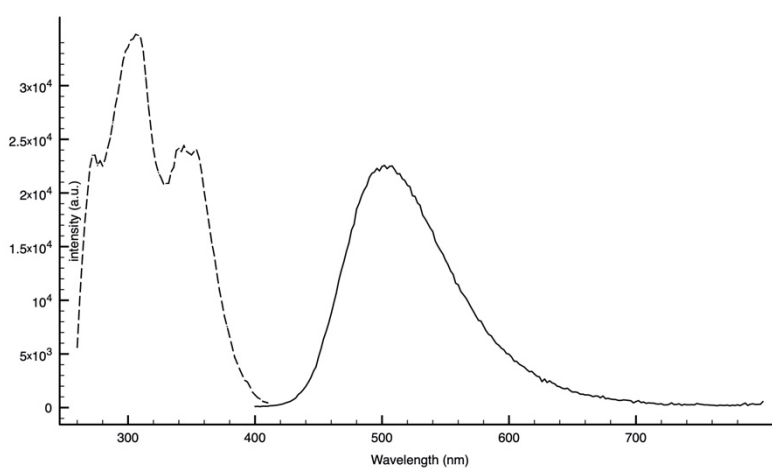

Figure S62: Emission (solid line) and Excitation (dashed line) profiles of compound **6**  $10^{-5}$  M, THF, 298K.

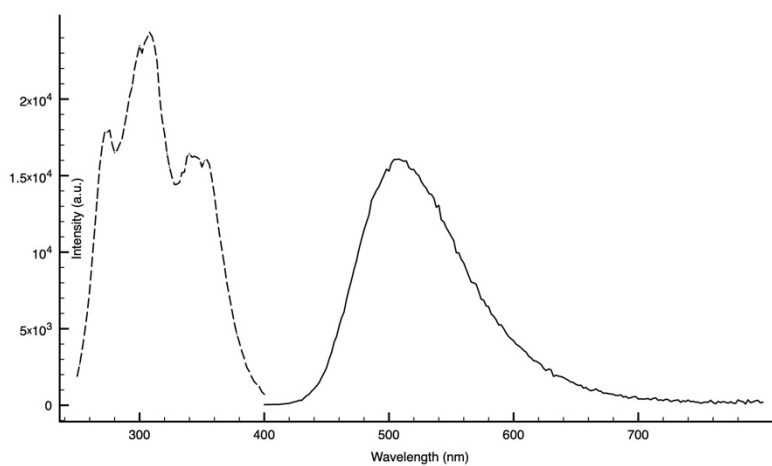

Figure S63: Emission (solid line) and Excitation (dashed line) profiles of compound **6**  $7.02 \times 10^{-5}$  M, DCM, 298K.

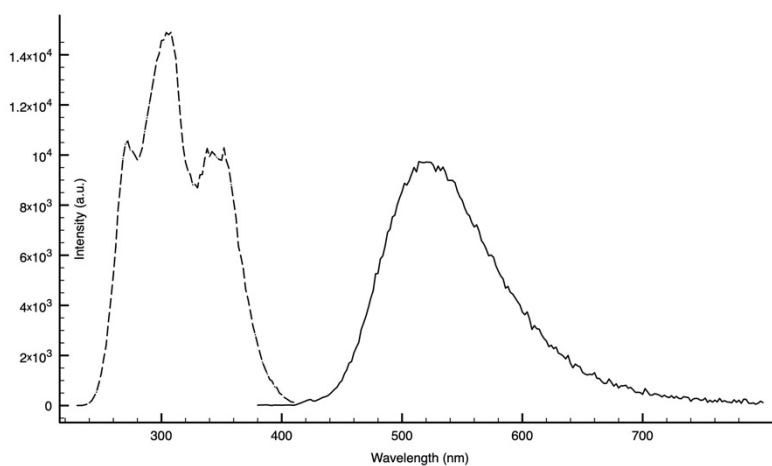

Figure S64: Emission (solid line) and Excitation (dashed line) profiles of compound **6**  $10^{-5}$  M,  $\text{CH}_3\text{CN}$ , 298K.

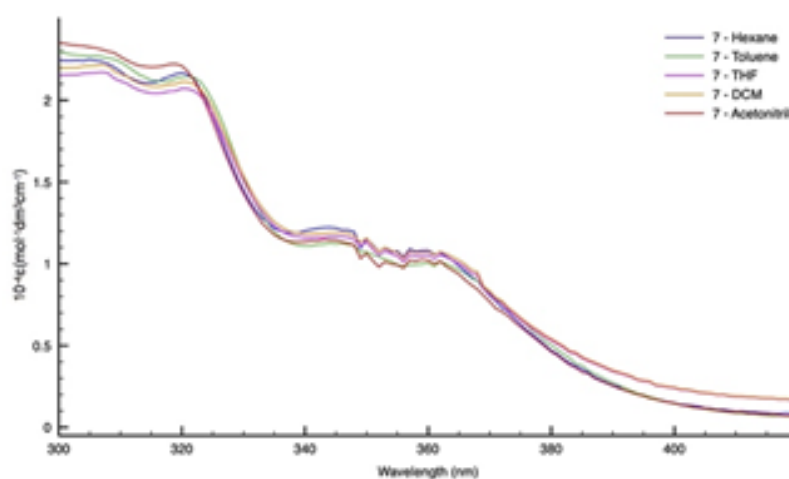

Figure S65: Absorption Profiles of compound **7**, 298 K,  $10^{-5}$  M.

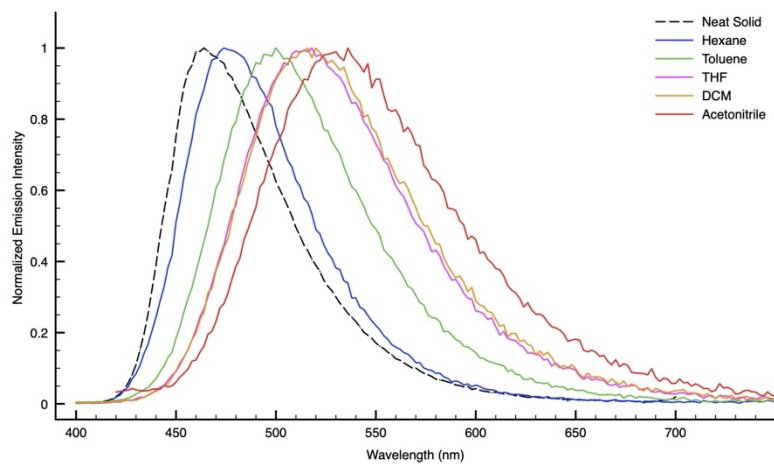

Figure S66: Normalized Emission Profiles of compound **7**, 298K.

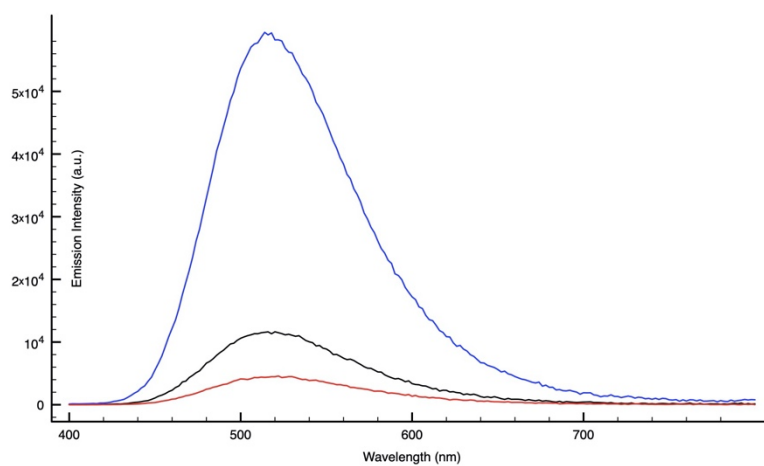

Figure S67: Emission Profiles of compound **7**,  $4.9 \times 10^{-6}$  M (black line),  $4.9 \times 10^{-5}$  M (blue line) and  $4.9 \times 10^{-4}$  M (red line),  $\text{CH}_2\text{Cl}_2$ ,  $\lambda_{\text{exc}} = 350$  nm, 298K.

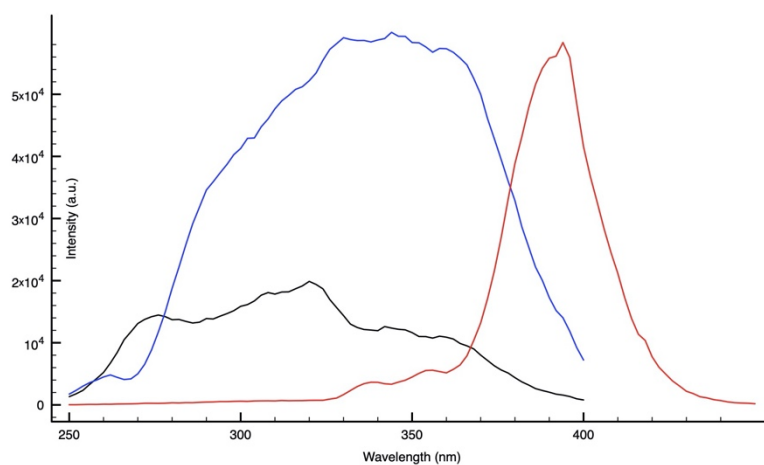

Figure S68: Excitation Profiles of compound **7**,  $4.9 \times 10^{-6}$  M (black line),  $4.9 \times 10^{-5}$  M (blue line) and  $4.9 \times 10^{-4}$  M (red line),  $\text{CH}_2\text{Cl}_2$ ,  $\lambda_{\text{emi}} = 520$  nm, 298K.

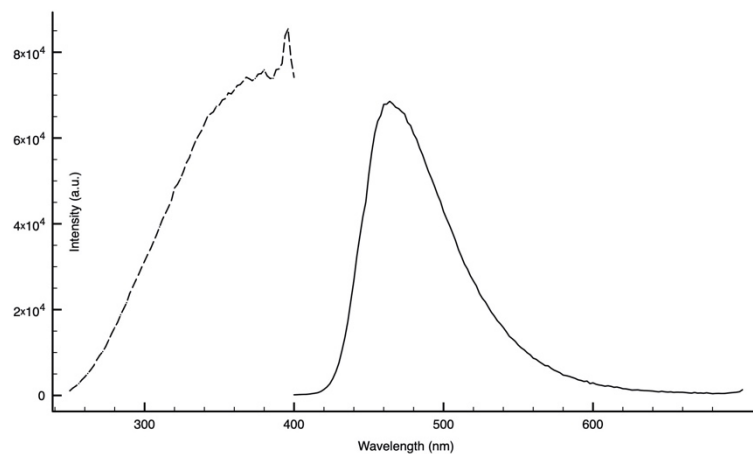

Figure S69: Emission (solid line) and Excitation (dashed line) profiles of compound **7**, Neat solid Matrix, 298K.

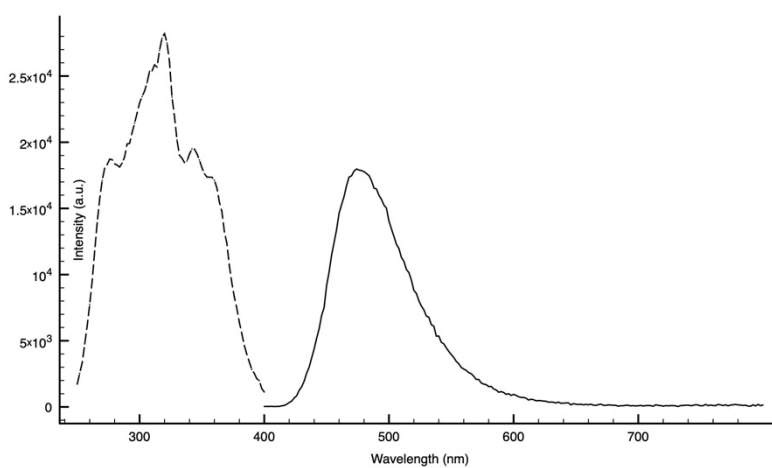

Figure S70: Emission (solid line) and Excitation (dashed line) profiles of compound **7**  $10^{-5}$  M, Hexane, 298K.

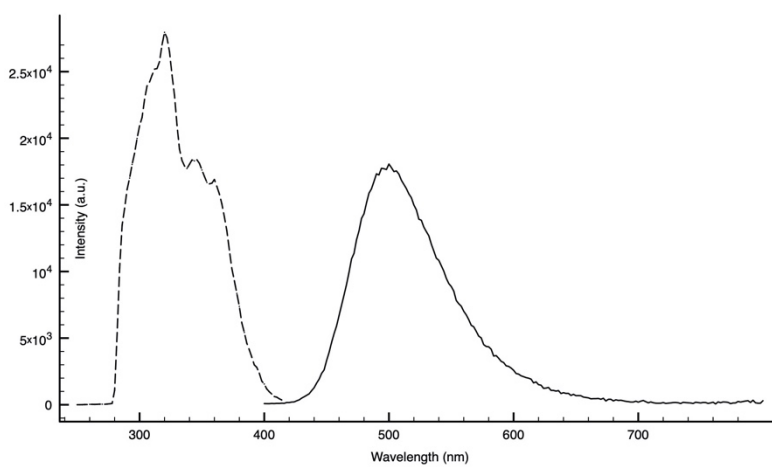

Figure S71: Emission (solid line) and Excitation (dashed line) profiles of compound **7**  $10^{-5}$  M, Toluene, 298K.

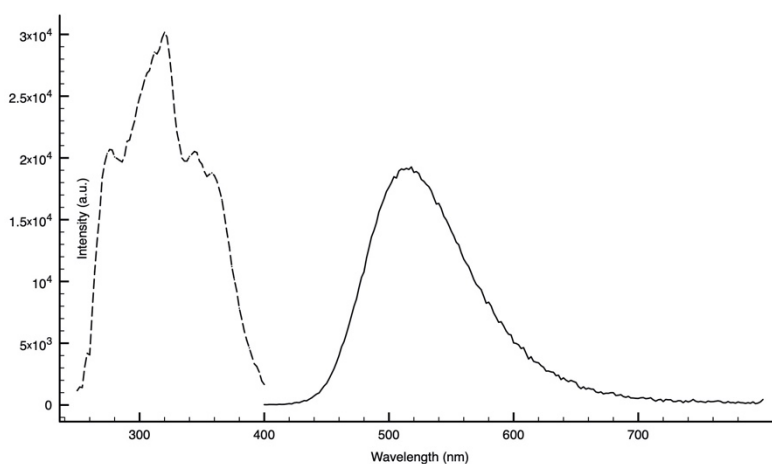

Figure S72: Emission (solid line) and Excitation (dashed line) profiles of compound **7** 10<sup>-5</sup> M, THF, 298K.

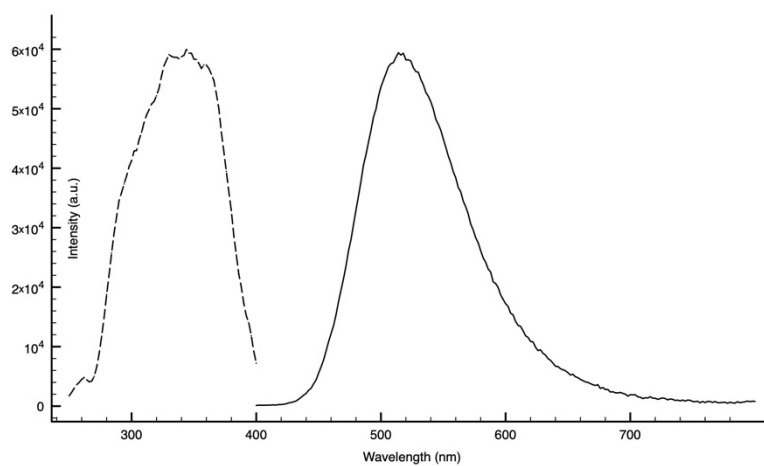

Figure S73: Emission (solid line) and Excitation (dashed line) profiles of compound **7** 4.9\*10<sup>-5</sup> M, DCM, 298K.

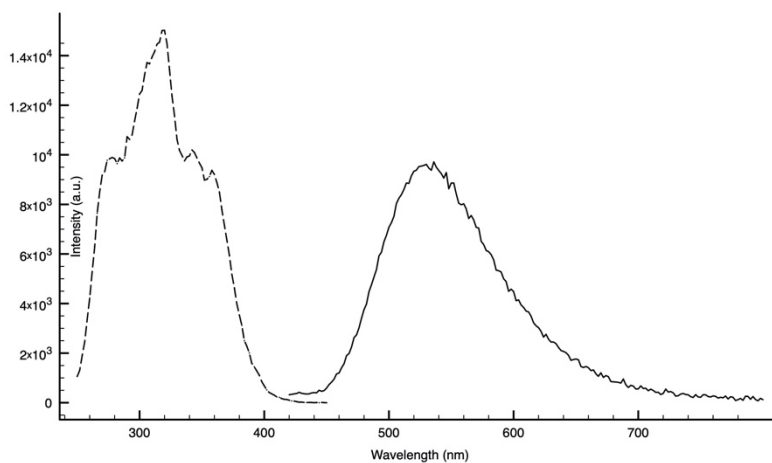

Figure S74: Emission (solid line) and Excitation (dashed line) profiles of compound **7** 10<sup>-5</sup> M, CH<sub>3</sub>CN, 298K.

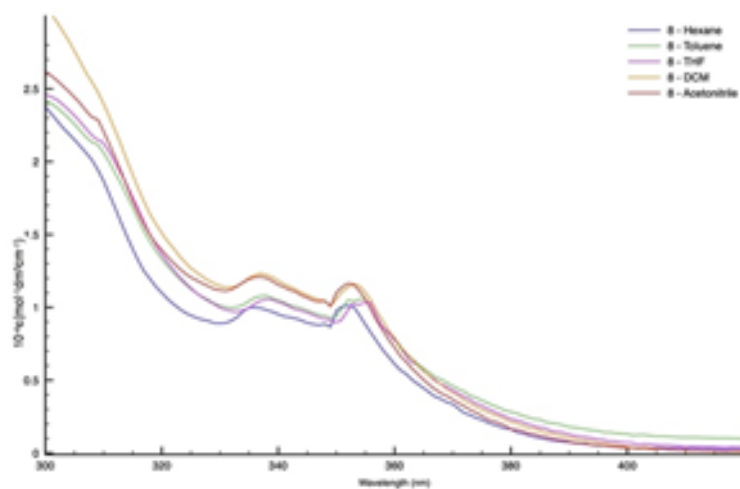

Figure S75: Absorption Profiles of compound **8**, 298 K,  $10^{-5}$  M.

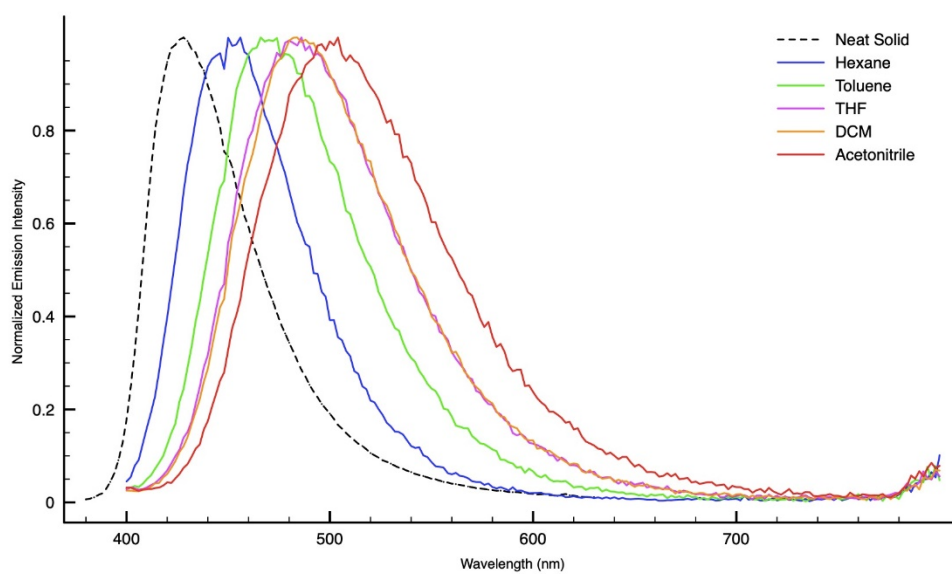

Figure S76: Normalized Emission Profiles of compound **8**, 298K.

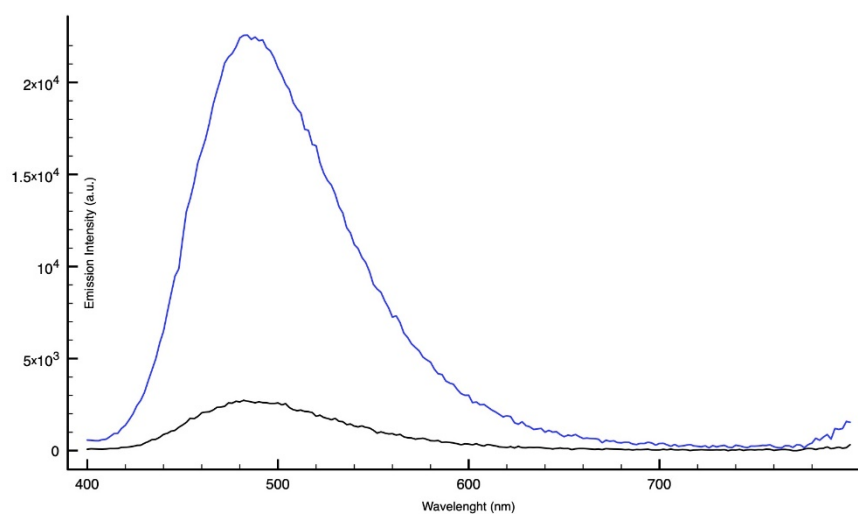

Figure S77: Emission Profiles of compound **8**,  $10^{-6}$  M (black line),  $10^{-5}$  M (blue line)  $\text{CH}_2\text{Cl}_2$ ,  $\lambda_{\text{exc}} = 350$  nm, 298K.

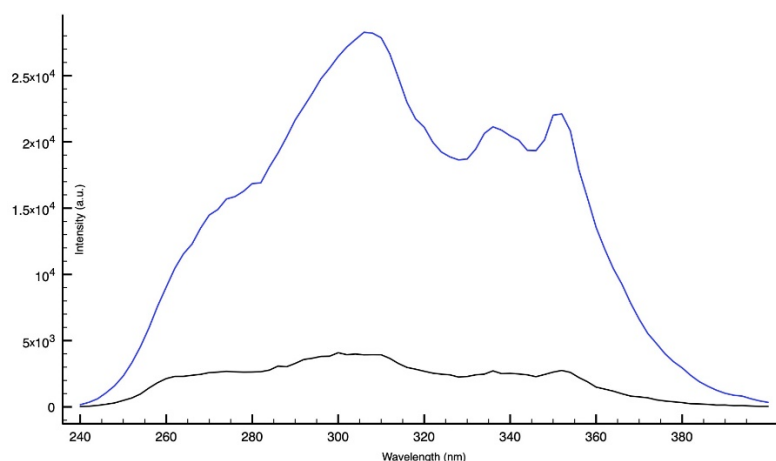

Figure S78: Excitation profiles of compound **8**,  $10^{-6}$  M (black line),  $10^{-5}$  M (blue line),  $\text{CH}_2\text{Cl}_2$ ,  $\lambda_{\text{emi}} = 484$  nm, 298K.

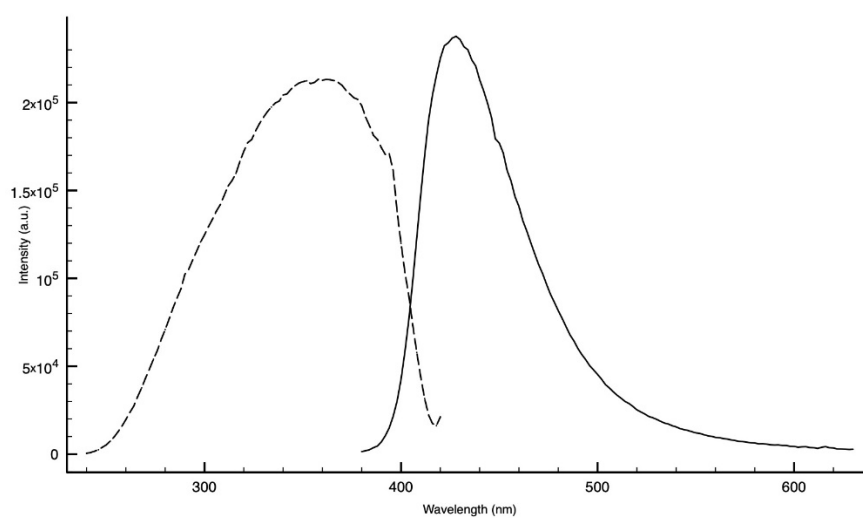

Figure S79: Emission (solid line) and Excitation (dashed line) profiles of compound **8**, Neat solid Matrix, 298K.

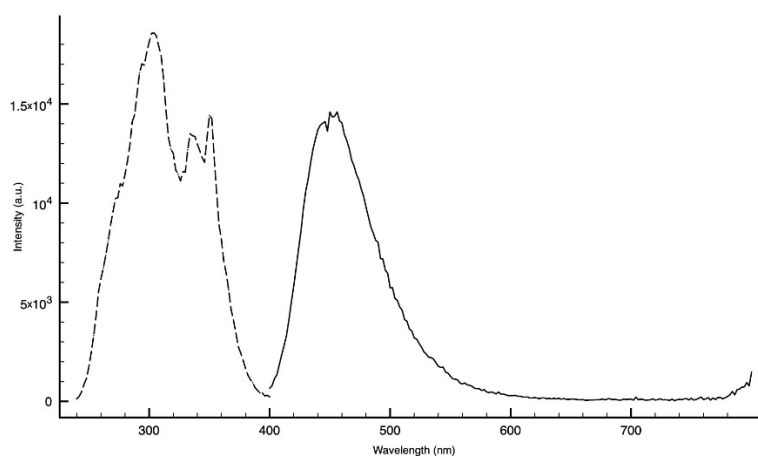

Figure S80: Emission (solid line) and Excitation (dashed line) profiles of compound **8**,  $10^{-5}$  M Hexane, 298K.

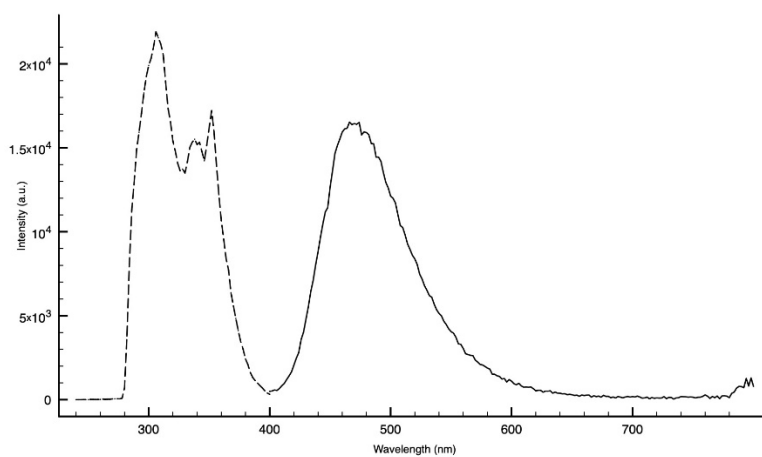

Figure S81: Emission (solid line) and Excitation (dashed line) profiles of compound **8**,  $10^{-5}$  M Toluene, 298K.

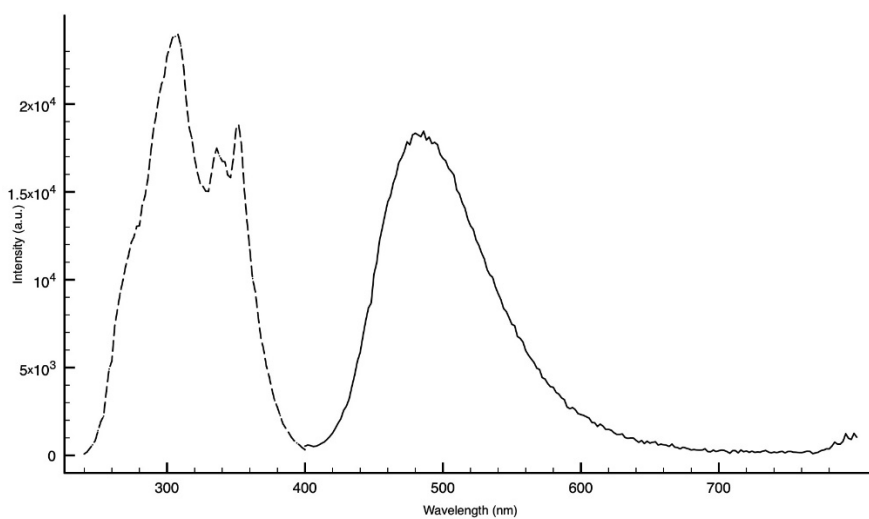

Figure S82: Emission (solid line) and Excitation (dashed line) profiles of compound **8**,  $10^{-5}$  M THF, 298K.

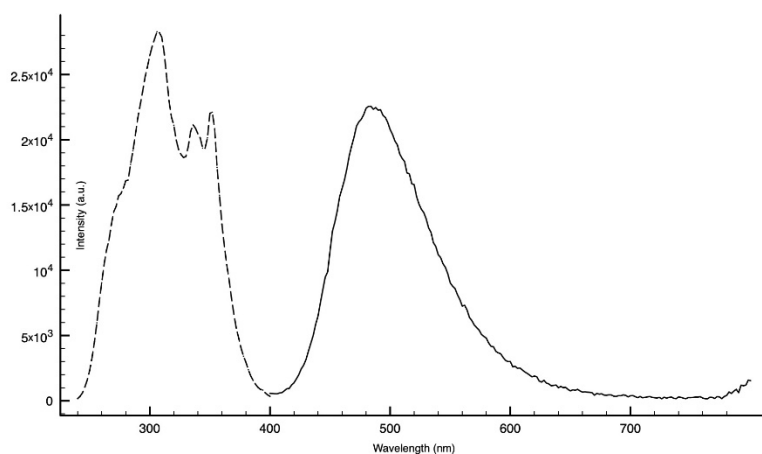

Figure S83: Emission (solid line) and Excitation (dashed line) profiles of compound **8**  $10^{-5}$  M DCM, 298K.



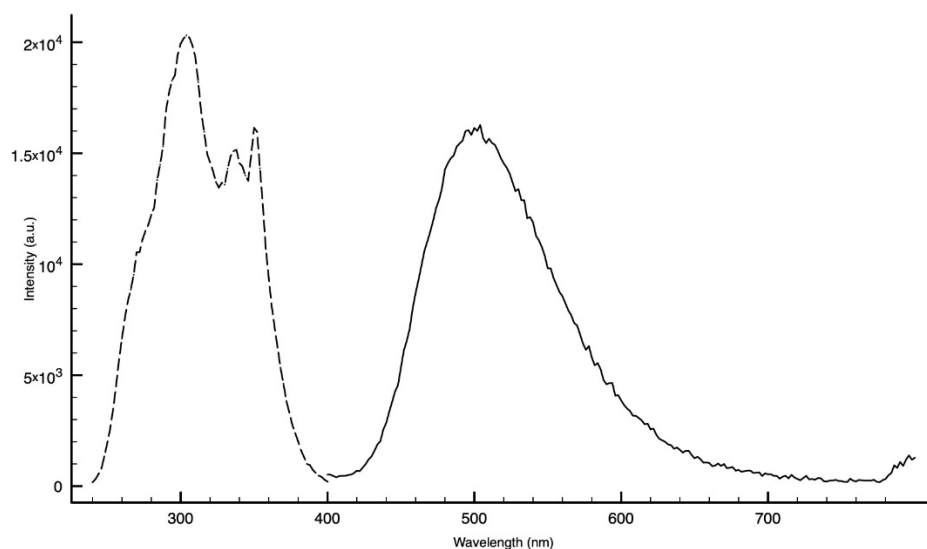

Figure S84: Emission (solid line) and Excitation (dashed line) profiles of compound **8**,  $10^{-5}$  M Acetonitrile, 298K.

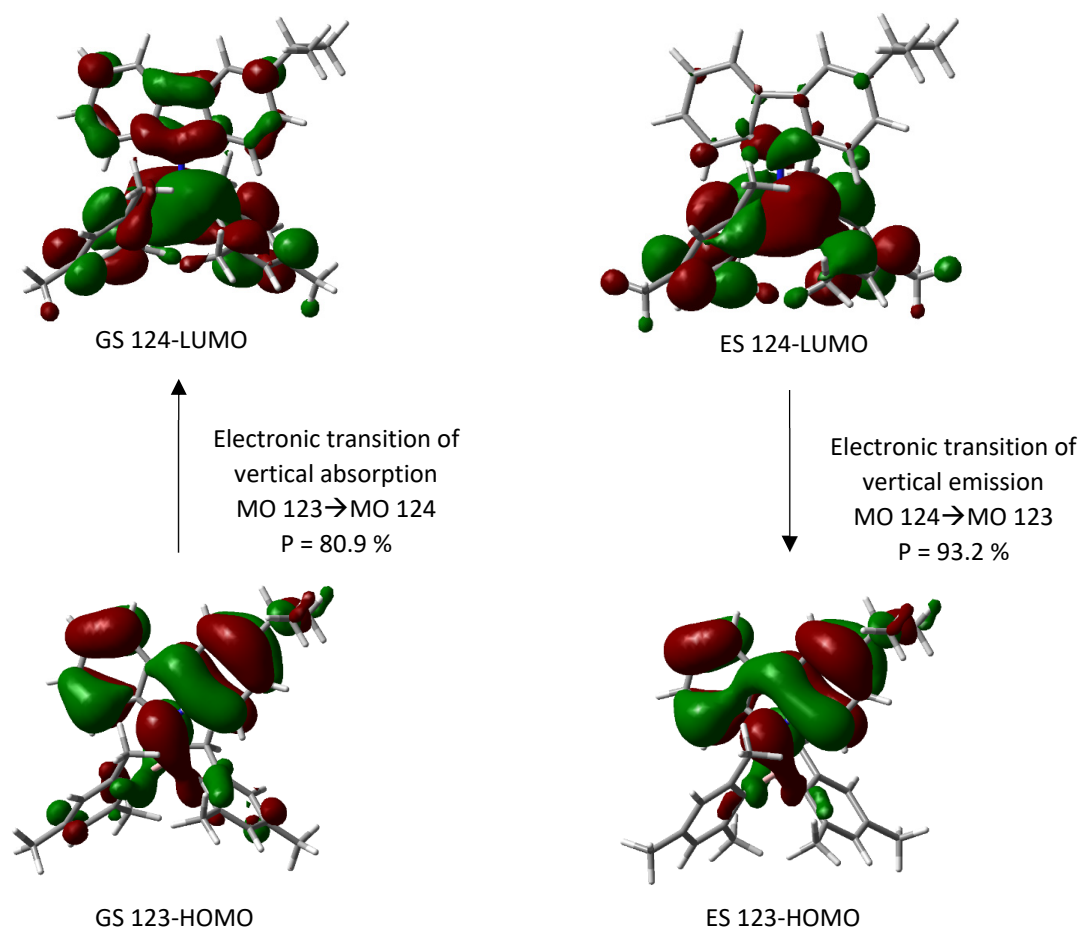

Figure S85: representation of the calculated orbitals HOMO and LUMO of GS and ES most likely involved in the vertical transitions of absorption and emission for compound **2a** in THF.

## Synthesis of substituted carbazole

Carbazole is commercially available (CAS: 86-74-8). The asymmetric carbazole **2c-4c** were prepared in accordance to the literature.<sup>1</sup>

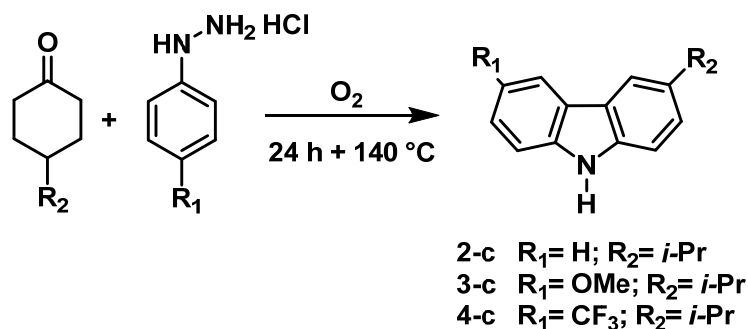

Scheme S1.

In a 25 mL oven-dried reaction flask cyclohexanone (5 mmol), the appropriate substituted phenylhydrazine hydrochloride (7.5 mmol) and the solvent *N*-methyl-2-pyrrolidone (NMP, 10 mL) were added and the resulting solution was stirred under oxygen (1atm) at +140 °C for 24 h. After cooling to room temperature, the NMP was distilled in high vacuum at +100 °C. The residue was diluted in DCM and filtered on Celite<sup>®</sup>, then evaporated the solvent. The carbazole product was purified by chromatography separation on silica gel, with eluent *n*-hexane/DCM in 7:3 ratio.

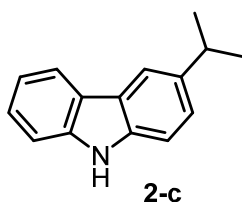

For compound **2-c** was used cyclohexanone (5 mmol) and (4-*i*-propyl-phenyl)-hydrazine hydrochloride (7.5 mmol). Yield: 38%.

**<sup>1</sup>H-NMR (600 MHz, Chloroform-d, 7.26 ppm +25°C)** δ 8.07 (dt, *J* = 7.8, 0.9 Hz, 1H), 7.95 (bs, 1H, NH), 7.93 (bs, 1H), 7.43 – 7.36 (m, 2H), 7.36 (dd, *J* = 8.3, 0.7 Hz, 1H), 7.31 (dd, *J* = 8.3, 1.7 Hz, 1H), 7.22 (dddd, *J* = 8.0, 6.1, 2.2, 0.9 Hz, 1H), 3.11 (dq, *J* = 13.8, 6.9 Hz, 1H), 1.37 (d, *J* = 6.9 Hz, 3H).

**<sup>13</sup>C-NMR (151 MHz, Chloroform-d, 77.0 ppm, +25°C)** δ: 140.22 (Cq), 139.85 (Cq), 137.95 (Cq), 125.57 (CH), 124.81 (CH), 123.39 (Cq), 123.35 (Cq), 120.18 (CH), 119.18 (CH), 117.45 (CH), 110.52 (CH), 110.30 (CH), 34.18 (CH), 24.70 (2CH<sub>3</sub>).

**HRMS(ESI-QTOF).** Calcd. for C<sub>15</sub>H<sub>16</sub>N<sup>+</sup> [M+H]<sup>+</sup> 210.12773. Found C<sub>15</sub>H<sub>16</sub>N<sup>+</sup> [M+H]<sup>+</sup>: 210.1277.

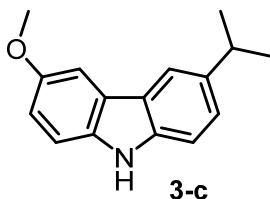

For compound **3-c** was used (4-*iso*-propyl)-cyclohexanone (5 mmol) and (4-methoxy-phenyl)-hydrazine hydrochloride (7.5 mmol). Yield: 30%.

**<sup>1</sup>H-NMR (600 MHz, Chloroform-d, 7.26 ppm +25 °C)** δ 7.89 – 7.86 (m, 1H), 7.81 (s, 1H), 7.55 (d, *J* = 2.5 Hz, 1H), 7.35 – 7.27 (m, 3H), 7.04 (dd, *J* = 8.7, 2.5 Hz, 1H), 3.94 (s, 3H), 3.09 (hept, *J* = 7.0 Hz, 1H), 1.37 (d, *J* = 6.9 Hz, 6H).

**<sup>13</sup>C NMR (151 MHz, Chloroform-d, 77.0 ppm, +25 °C)** δ 153.75 (Cq), 139.84 (Cq), 138.80 (Cq), 134.79 (Cq), 124.85 (CH), 123.84 (Cq), 123.40 (Cq), 117.30 (CH), 114.90 (CH), 111.25 (CH), 110.48 (CH), 102.99 (CH), 56.06 (CH<sub>3</sub>), 34.17 (CH), 24.70 (2 CH<sub>3</sub>).

**HRMS(ESI-QTOF).** Calcd. for C<sub>16</sub>H<sub>18</sub>NO<sup>+</sup> [M+H]<sup>+</sup> 240.13829. Found C<sub>16</sub>H<sub>18</sub>NO<sup>+</sup> [M+H]<sup>+</sup>: 240.1385.

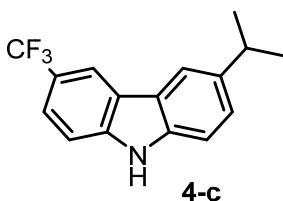

For compound **4-c**: In a 25 mL oven-dried reaction flask (4-trifluoromethyl)-phenylhydrazine hydrochloride (7.5 mmol) was dissolved in 10 mL of NMP. After 10 minutes (4-*i*-propyl)-cyclohexanone (5 mmol) was added and the resulting solution was stirred under oxygen (1 atm) at +140 °C for 24 h. Since the aromatization was not complete, a catalytic amount of iodine was added and the solution was stirred for one hour. After cooling to room temperature, the NMP was distilled in high vacuum at +100 °C. The resulting residue was diluted in DCM and filtered on Celite<sup>®</sup>, then the mixture was washed with sodium sulphite and extracted with DCM. The combined organic layers were dried with sodium sulphate and then evaporated the solvent. The carbazole product was purified by chromatography separation on silica gel, with eluent *n*-hexane/DCM in 7:3 ratio. Yield: 36%

**<sup>1</sup>H-NMR (600 MHz, Chloroform-d, 7.26 ppm +25°C)** δ 8.37 – 8.33 (m, 1H), 8.17 (s, 1H, NH), 7.97 (d, *J* = 1.6 Hz, 1H), 7.63 (dd, *J* = 8.6, 1.8 Hz, 1H), 7.46 (d, *J* = 8.4 Hz, 1H), 7.42 – 7.35 (m, 2H), 3.12 (hept, *J* = 7.0 Hz, 1H), 1.37 (d, *J* = 6.9 Hz, 6H).

**<sup>13</sup>C-NMR (151 MHz, Chloroform-d, 77.0 ppm, +25°C)** δ 141.25 (Cq), 141.18 (Cq), 138.40 (Cq), 125.93 (CH), 125.28 (CF<sub>3</sub>, q, *J* = 271.2 Hz), 123.03 (Cq), 122.93 (Cq), 122.42 (CH, q, *J* = 3.6 Hz),

121.51 (Cq, q,  $J = 32.2$  Hz), 117.82 (CH, q,  $J = 4.1$  Hz), 117.67 (CH), 110.68 (CH), 110.55 (CH), 34.17 (CH), 24.61 (2CH<sub>3</sub>).

<sup>19</sup>F NMR (376 MHz, Chloroform-d, rif. BF<sub>3</sub>-Et<sub>2</sub>O +25 °C)  $\delta$  -60.16.

HRMS(ESI-QTOF). Calcd. for C<sub>16</sub>H<sub>15</sub>F<sub>3</sub>N<sup>+</sup> [M+H]<sup>+</sup> 278.11511. Found C<sub>16</sub>H<sub>15</sub>F<sub>3</sub>N<sup>+</sup> [M+H]<sup>+</sup>: 278.1149.

### Synthesis of substituted benzocarbazole

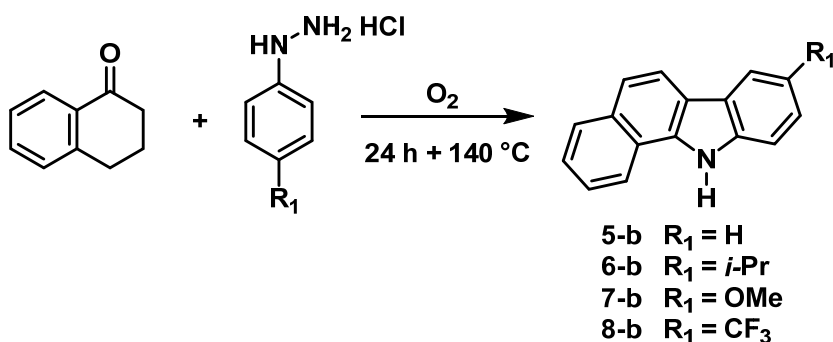

Scheme S2.

In a 25 mL oven-dried reaction flask  $\alpha$ -tetralone (5 mmol), the appropriate substituted phenylhydrazine hydrochloride (7.5 mmol) and the solvent *N*-methyl-2-pyrrolidone (NMP, 10 mL) were added and the resulting solution was stirred under oxygen (1 atm) at +140 °C for 24 h. After cooling to room temperature, the NMP was distilled in high vacuum at +100 °C. The residue was diluted in DCM and filtered on Celite<sup>®</sup>, then evaporated the solvent. The products were purified by chromatography separation on silica gel, with eluent *n*-hexane/DCM in 7:3 ratio.

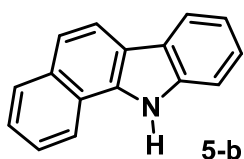

For compound **5-b** was used  $\alpha$ -tetralone (5 mmol) and phenylhydrazine hydrochloride (7.5 mmol). Yield: 59%.

<sup>1</sup>H-NMR (600 MHz, Chloroform-d, 7.26 ppm, +25 °C)  $\delta$  8.78 (s, 1 N-H), 8.17 – 8.11 (m, 3H), 8.02 (d,  $J = 8.1$  Hz, 1H), 7.67 (d,  $J = 8.5$  Hz, 1H), 7.63 – 7.57 (m, 2H), 7.55 (ddd,  $J = 8.1, 6.9, 1.3$  Hz, 1H), 7.45 (ddd,  $J = 8.2, 7.0, 1.2$  Hz, 1H), 7.32 (td,  $J = 7.5, 1.0$  Hz, 1H).

**<sup>13</sup>C-NMR (151 MHz, Chloroform-d, 77 ppm, +25 °C)** δ 138.45 (Cq), 134.85 (Cq), 132.42 (Cq), 129.04 (CH), 125.54 (CH), 125.20 (CH), 124.86 (CH), 124.18 (Cq), 121.07 (Cq), 120.44 (CH), 120.21 (CH), 119.97 (CH), 119.90 (CH), 119.31 (CH), 118.43 (Cq), 111.02 (CH).

**HRMS(ESI-QTOF).** Calcd. for C<sub>16</sub>H<sub>12</sub>N<sup>+</sup> [M+H]<sup>+</sup> 218.09643. Found C<sub>16</sub>H<sub>12</sub>N<sup>+</sup> [M+H]<sup>+</sup>: 218.0958.

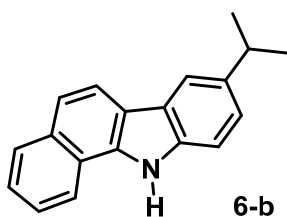

For compound **6-b** was used  $\alpha$ -tetralone (5 mmol) and (4-*i*-propyl-phenyl)-hydrazine hydrochloride (7.5 mmol). Yield: 62%

**<sup>1</sup>H-NMR (600 MHz, Chloroform-d, 7.26 ppm +25°C)** δ 8.13 (t, *J* = 8.0 Hz, 2H), 8.03 – 7.96 (m, 2H), 7.65 (d, *J* = 8.5 Hz, 1H), 7.59 (ddd, *J* = 8.1, 6.8, 1.2 Hz, 1H), 7.55 – 7.50 (m, 2H), 7.34 (dd, *J* = 8.3, 1.7 Hz, 1H), 3.14 (hept, *J* = 6.9 Hz, 1H), 1.39 (d, *J* = 7.0 Hz, 6H).

**<sup>13</sup>C-NMR (151 MHz, Chloroform-d, 77.0 ppm, +25°C)** δ 140.79 (Cq), 137.00 (Cq), 135.18 (Cq), 132.36 (Cq), 129.03 (CH), 125.42 (CH), 125.05 (CH), 124.24 (Cq), 123.99 (CH), 121.16 (Cq), 120.44 (CH), 119.95 (CH), 119.34 (CH), 118.48 (Cq), 116.96 (CH), 110.77 (CH), 34.29 (CH), 24.72 (2CH<sub>3</sub>).

**HRMS(ESI-QTOF).** Calcd. for C<sub>19</sub>H<sub>18</sub>N<sup>+</sup> [M+H]<sup>+</sup> 260.14338. Found C<sub>19</sub>H<sub>18</sub>N<sup>+</sup> [M+H]<sup>+</sup>: 260.1430.

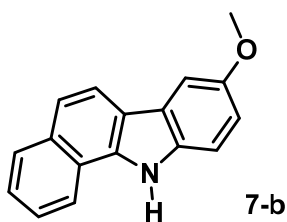

For compound **7-b** was used  $\alpha$ -tetralone (5 mmol) and (4-methoxy-phenyl)-hydrazine hydrochloride (7.5 mmol). Yield: 43%.

**<sup>1</sup>H-NMR (600 MHz, Chloroform-d, TMS +25 °C)** δ 8.67 (s, 1H), 8.11 (d, *J* = 8.1 Hz, 1H), 8.09 (d, *J* = 8.5 Hz, 1H), 8.00 (d, *J* = 8.1 Hz, 1H), 7.63 (d, *J* = 8.5 Hz, 1H), 7.62 – 7.56 (m, 2H), 7.53 (ddd, *J* = 8.1, 6.9, 1.3 Hz, 1H), 7.49 (d, *J* = 8.7 Hz, 1H), 7.09 (dd, *J* = 8.7, 2.4 Hz, 1H), 3.97 (s, 3H).

**<sup>13</sup>C-NMR (151 MHz, Chloroform-d, TMS, +25 °C)** δ 154.31 (Cq), 135.64 (Cq), 133.39 (Cq), 132.39 (Cq), 129.02 (CH), 125.50 (CH), 125.20 (CH), 124.61 (Cq), 121.23 (Cq), 120.43 (CH), 119.83 (CH), 119.25 (CH), 118.39 (Cq), 114.43 (CH), 111.75 (CH), 102.31 (CH), 56.03 (CH<sub>3</sub>).

**HRMS(ESI-QTOF).** Calcd. for C<sub>17</sub>H<sub>14</sub>NO<sup>+</sup> [M+H]<sup>+</sup> 248.10699. Found C<sub>17</sub>H<sub>14</sub>NO<sup>+</sup> [M+H]<sup>+</sup>: 248.1067.

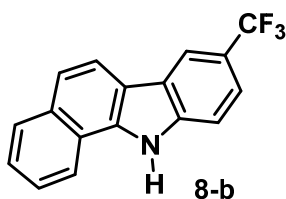

For compound **8-b**: (4-trifluoromethyl)-phenylhydrazine hydrochloride (7.5 mmol) was dissolved in 10 mL of NMP. The  $\alpha$ -tetralone (5 mmol) was added and the resulting solution was stirred under oxygen (1 atm) at +140 °C for 24 h. Since the aromatization was not complete, a catalytic amount of iodine was added and the solution was stirred one hour. After cooling to room temperature, the NMP was distilled in high vacuum at +100 °C. The residue was diluted in DCM and filtered on Celite®, then the mixture was washed with sodium sulphite and extracted with DCM. The combined organic layer was dried with sodium sulphate and then evaporated the solvent. The benzocarbazole product was purified by chromatography separation on silica gel, with eluent *n*-hexane/DCM in 7:3 ratio. Yield: 28%.

**<sup>1</sup>H NMR (600 MHz, Chloroform-d, 7.26 ppm +25 °C)**  $\delta$  8.97 (s, 1H), 8.40 (s, 1H), 8.15 (d,  $J$  = 8.4 Hz, 2H), 8.04 (d,  $J$  = 8.1 Hz, 1H), 7.72 (d,  $J$  = 8.6 Hz, 1H), 7.66 (p,  $J$  = 8.5 Hz, 3H), 7.61 – 7.56 (m, 1H).

**<sup>13</sup>C NMR (151 MHz, Chloroform-d, TMS, 77.0 ppm, +25 °C)**  $\delta$  139.80 (Cq), 135.71 (Cq), 132.78 (Cq), 129.18 (CH), 125.97 (CH), 125.84 (CH), 125.23 (Cq, q,  $J_{1-CF}$  = 271.8 Hz), 123.75 (Cq), 122.38 (Cq, q,  $J_{2-CF}$  = 31.7 Hz), 121.6 (CH, q,  $J_{4-CF}$  = 3.0 Hz), 121.19 (CH), 120.98 (Cq), 120.42 (CH), 119.03 (CH), 118.20 (Cq), 117.58 (CH, q,  $J_{4-CF}$  = 3.0 Hz), 111.15 (CH).

**<sup>19</sup>F NMR (376 MHz, Chloroform-d, rif. BF<sub>3</sub>-Et<sub>2</sub>O +25 °C)**  $\delta$  -62.13.

**HRMS(ESI-QTOF).** Calcd. for C<sub>17</sub>H<sub>11</sub>F<sub>3</sub>N<sup>+</sup> [M+H]<sup>+</sup> 286.08381. Found C<sub>17</sub>H<sub>11</sub>F<sub>3</sub>N<sup>+</sup> [M+H]<sup>+</sup>: 286.0832.

## Synthesis of compounds 1-4

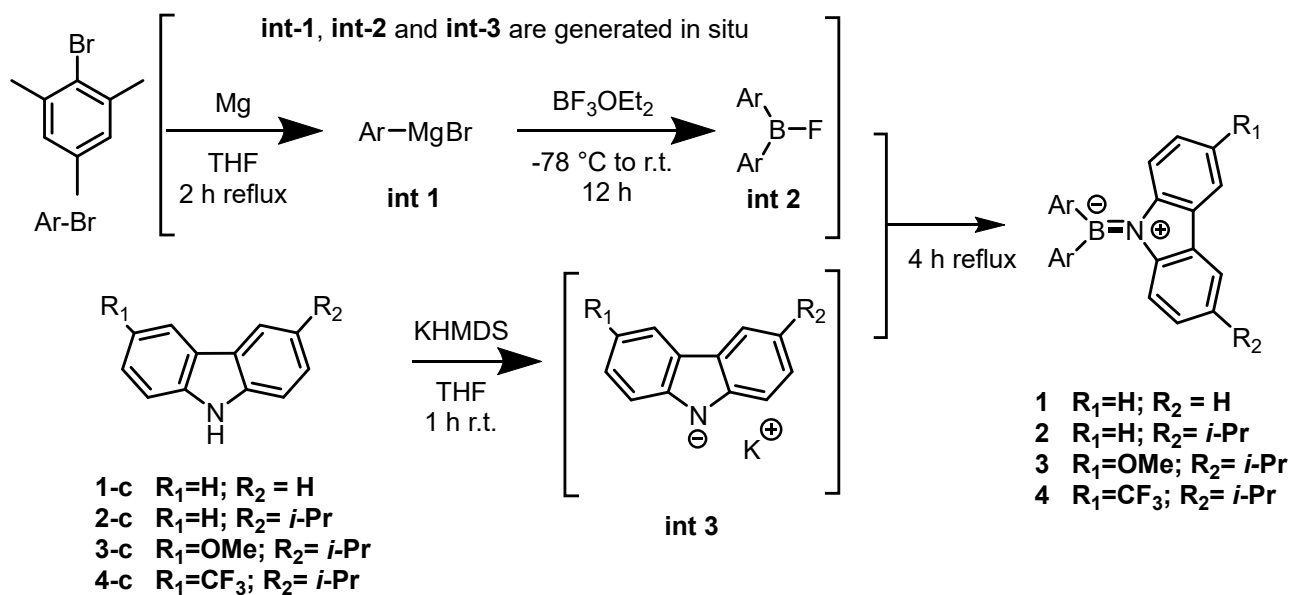

Scheme S3.

In a 25 mL oven-dried reaction flask was added 2-bromomesitylene (0.45 mL, 6 mmol, 2 eq), magnesium (0.2 g) in dry THF (6 mL) and a tip of iodine under nitrogen flow. The mixture was stirred and left to reflux for 2 hours obtaining the Grignard reagent **int-1**. The solution was brought to  $-78\text{ }^\circ\text{C}$  and boron trifluoride diethyl etherate ( $\text{BF}_3\text{OEt}_2$ , 0.41 mL, 3 mmol, 1 eq) was added dropwise. The temperature was slowly increased to room temperature in 12 h obtaining a solution 0.5 M of **int-2**.

In another 25 mL oven-dried reaction flask was added carbazole (1 eq) in dry THF (6 mL). The potassium bis(trimethylsilyl)amide (KHMDS) (1 eq, 0.5 M) was therefore added dropwise and the mixture was stirred at room temperature for 1 h, obtaining **int-3**.

The **int-2** (1 eq) was added dropwise to the **int-3** (1 eq) and the mixture was refluxed 4 hours. After cooling to room temperature, the solvent was removed and the residue was dissolved in DCM, then filtered on Celite<sup>®</sup>. The product was purified by chromatography separation on silica gel column with *n*-hexane and DCM (7:3) as eluent. Evaporated the solvents, a white solid was obtained. The product was crystallized in acetonitrile/DCM (6:1).

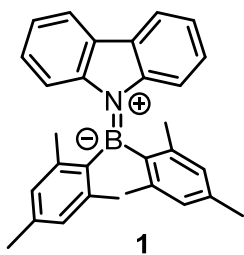

Compound **1** was synthesized starting with carbazole **1-c**. Yield: 49%. Spectroscopic data is consistent with previously reported results.<sup>2</sup>

**<sup>1</sup>H NMR (600 MHz, Methylene Chloride-*d*<sub>2</sub>, 5.33 ppm, +25 °C)** δ 8.01 (dt, *J* = 7.7, 0.9 Hz, 2H), 7.27 (td, *J* = 7.4, 0.9 Hz, 2H), 7.09 (ddd, *J* = 8.5, 7.2, 1.3 Hz, 2H), 6.95 (dd, *J* = 8.5, 0.9 Hz, 2H), 6.86 (s, 4H), 2.35 (s, 6H), 2.03 (s, 12H).

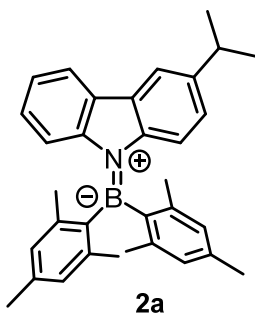

Compound **2a** was synthesized starting with carbazole **2-c**. Yield: 55%.

**<sup>1</sup>H NMR (600 MHz, Methylene Chloride-*d*<sub>2</sub>, 5.33 ppm, +25 °C)** δ 7.99 (ddd, *J* = 7.7, 1.4, 0.7 Hz, 1H), 7.85 (d, *J* = 1.8 Hz, 1H), 7.25 (ddd, *J* = 7.8, 7.3, 0.9 Hz, 1H), 7.06 (ddd, *J* = 8.5, 7.2, 1.3 Hz, 1H), 6.97 (dd, *J* = 8.6, 1.9 Hz, 1H), 6.92 (dt, *J* = 8.5, 0.9 Hz, 1H), 6.85 (d, *J* = 4.0 Hz, 4H), 6.82 (dd, *J* = 8.7, 0.6 Hz, 1H), 3.03 (hept, *J* = 6.9 Hz, 1H), 2.34 (d, *J* = 3.2 Hz, 6H), 2.03 (d, *J* = 7.3 Hz, 12H), 1.32 (d, *J* = 6.9 Hz, 6H).

**<sup>13</sup>C NMR (151 MHz, Methylene Chloride-*d*<sub>2</sub>, 53.52 ppm, +25 °C)** δ 143.67 (Cq), 143.64 (Cq), 141.64 (Cq), 141.06 (Cq), 139.40 (Cq), 139.37 (Cq), 138.36 (Cq-B, broad), 128.76 (CH), 128.73 (CH), 128.39 (Cq), 128.16 (Cq), 126.02 (CH), 125.20 (CH), 122.66 (CH), 119.41 (CH), 116.85 (CH), 115.54 (CH), 115.19 (CH), 34.04 (CH), 24.21 (CH<sub>3</sub>), 21.71 (CH<sub>3</sub>), 21.11 (CH<sub>3</sub>).

**<sup>11</sup>B NMR (192 MHz, Methylene Chloride-*d*<sub>2</sub>, ref. BF<sub>3</sub>Et<sub>2</sub>O, +25 °C)** δ 51.97.

**HRMS(ESI-QTOF).** Calcd. for C<sub>33</sub>H<sub>37</sub>BN<sup>+</sup> [M+H]<sup>+</sup> 458.30136. Found C<sub>33</sub>H<sub>37</sub>BN<sup>+</sup> [M+H]<sup>+</sup>: 458.3019.



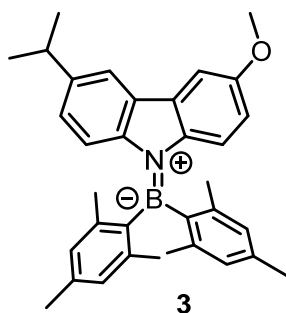

Compound **3** was synthesized starting with carbazole **3-c**. Yield: 88%

**<sup>1</sup>H NMR (600 MHz, Methylene Chloride-*d*<sub>2</sub>, 5.33 ppm, +25 °C)** δ 7.81 (d, *J* = 1.8 Hz, 1H), 7.45 (d, *J* = 2.6 Hz, 1H), 6.97 (dd, *J* = 8.6, 1.8 Hz, 1H), 6.86 (s, 2H), 6.85 (s, 2H), 6.81 (d, *J* = 8.6 Hz, 1H), 6.79 (d, *J* = 9.0 Hz, 1H), 6.66 (dd, *J* = 9.0, 2.6 Hz, 1H), 3.88 (s, 3H), 3.03 (hept, *J* = 6.9 Hz, 1H), 2.35 (s, 3H), 2.34 (s, 3H), 2.04 (s, 6H), 2.03 (s, 6H), 1.32 (d, *J* = 6.9 Hz, 6H).

**<sup>13</sup>C NMR (151 MHz, Methylene Chloride-*d*<sub>2</sub>, 53.52 ppm, +25 °C)** δ 156.12 (Cq), 143.51 (Cq), 142.30 (Cq), 141.08 (Cq), 141.05 (Cq), 139.27 (Cq), 139.24 (Cq), 138.38 (Cq-B. broad), 137.94 (Cq), 129.28 (Cq), 128.73 (CH), 128.70 (CH), 128.23 (Cq), 125.30 (CH), 116.73 (Cq), 116.41 (CH), 115.35 (CH), 114.16 (CH), 102.29 (CH), 55.69 (CH<sub>3</sub>), 34.04 (CH), 24.22 (CH<sub>3</sub>), 21.73 (CH<sub>3</sub>), 21.71 (CH<sub>3</sub>), 21.11 (CH<sub>3</sub>), 21.10 (CH<sub>3</sub>).

**<sup>11</sup>B NMR (192 MHz, Methylene Chloride-*d*<sub>2</sub>, ref. BF<sub>3</sub>Et<sub>2</sub>O, +25 °C)** δ 51.51.

**HRMS(ESI-QTOF).** Calcd. for C<sub>34</sub>H<sub>39</sub>BNO<sup>+</sup> [M+H]<sup>+</sup> 488.31192. Found C<sub>34</sub>H<sub>39</sub>BNO<sup>+</sup> [M+H]<sup>+</sup>: 488.3115.

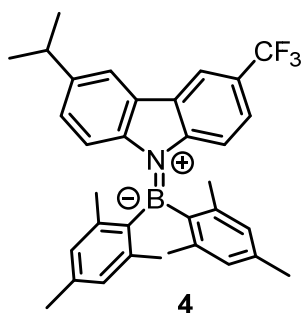

Compound **4** was synthesized starting with carbazole **4-c**. Yield: 54%

**<sup>1</sup>H NMR (600 MHz, Methylene Chloride-*d*<sub>2</sub>, 5.33 ppm, +25 °C)** 8.29 – 8.26 (m, 1H), 7.90 (d, *J* = 1.9 Hz, 1H), 7.31 (dd, *J* = 8.9, 2.0 Hz, 1H), 7.04 (dd, *J* = 8.7, 1.9 Hz, 1H), 7.00 (d, *J* = 8.7 Hz, 1H), 6.87 (s, 4H), 6.85 (d, *J* = 8.6 Hz, 1H), 3.04 (p, *J* = 6.9 Hz, 1H), 2.34 (d, *J* = 2.7 Hz, 6H), 2.01 (d, *J* = 6.5 Hz, 12H), 1.32 (d, *J* = 6.9 Hz, 6H).

**<sup>13</sup>C NMR (151 MHz, Methylene Chloride-*d*<sub>2</sub>, 53.52 ppm, +25 °C)** δ 145.54 (Cq), 144.18 (Cq), 142.23 (Cq), 141.10 (Cq), 141.09 (Cq), 139.93 (Cq), 139.81 (Cq), 137.83 (Cq-B, broad), 128.96 (CH), 128.86 (CH), 128.40 (Cq), 127.20 (Cq), 126.30 (CH), 125.08 (Cq, q, *J*<sub>1-CF</sub> = 271.8 Hz), 124.41 (Cq, q, *J*<sub>2-CF</sub> = 31.7 Hz), 122.64 (CH, q, *J*<sub>3-CF</sub> = 3.0 Hz), 117.12 (CH), 116.87 (CH, q, *J*<sub>3-CF</sub> = 3.0 Hz), 115.72 (CH), 115.34 (CH), 34.03 (CH), 24.14 (CH<sub>3</sub>), 21.71 (CH<sub>3</sub>), 21.69 (CH<sub>3</sub>), 21.13 (CH<sub>3</sub>), 21.12 (CH<sub>3</sub>).

**<sup>11</sup>B NMR (192 MHz, Methylene Chloride-*d*<sub>2</sub>, ref. BF<sub>3</sub>Et<sub>2</sub>O, +25 °C)** δ 53.19

**<sup>19</sup>F NMR (376 MHz, Methylene Chloride-*d*<sub>2</sub>, ref. BF<sub>3</sub>Et<sub>2</sub>O, +25 °C)** δ -61.35

**HRMS(ESI-QTOF).** Calcd. for C<sub>34</sub>H<sub>36</sub>BF<sub>3</sub>N<sup>+</sup> [M+H]<sup>+</sup> 526.28874. Found C<sub>34</sub>H<sub>36</sub>BF<sub>3</sub>N [M+H]<sup>+</sup>: 526.2881.

## Synthesis of compounds **2b**

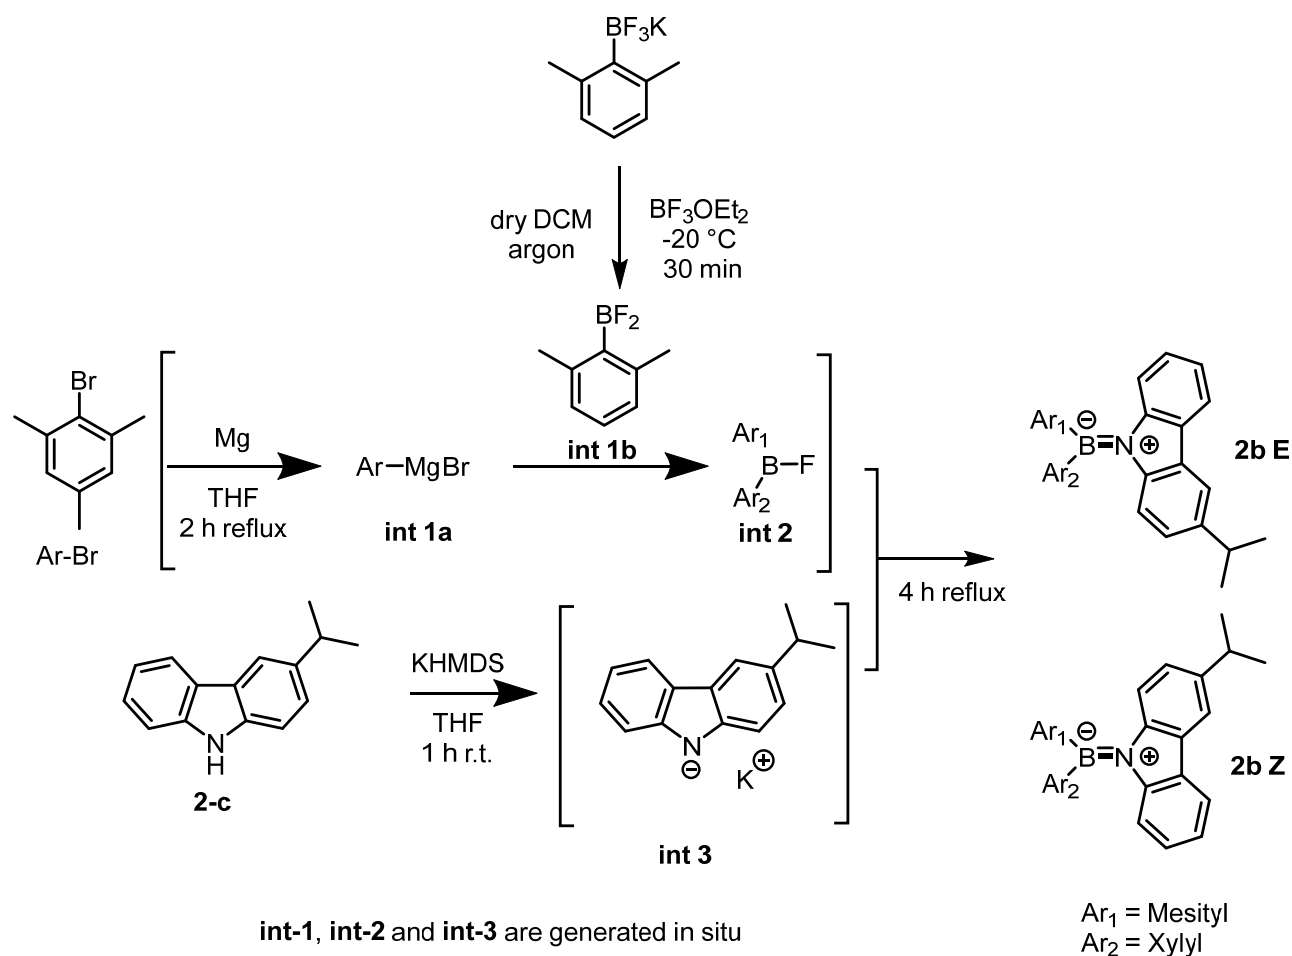

Scheme S4.

In a 25 mL oven-dried reaction flask was added potassium 2,6-dimethylphenyltrifluoroborate (1.27 g, 6 mmol, 2 eq) in 6 mL of dry DCM under argon flow. Boron trifluoride diethyl etherate ( $\text{BF}_3\text{OEt}_2$ , 0.82 mL, 6 mmol, 1 eq) was added dropwise at  $-20\text{ }^\circ\text{C}$  and the mixture was stirred for 30 minutes. The solution was brought to  $-78\text{ }^\circ\text{C}$  and the excess of boron trifluoride diethyl etherate was removed by vacuum. Thereafter the solution was filtered in a dropping funnel under argon flow and was used in the second step (**int-1b**).

In a 25 mL oven-dried reaction flask was added 2-bromomesitylene (0.45 mL, 6 mmol, 2 eq), magnesium (0.2 g), dry THF (6 mL) and a tip of iodine under argon flow. The mixture was stirred and left to reflux for 2 hours obtaining the Grignard reagent **int-1a**. The temperature was then decreased to  $-78\text{ }^\circ\text{C}$  and the solution of **int-1b** in dry DCM (6 mL, 6 mmol, 1 eq) was added dropwise. The temperature was slowly increased to room temperature in 12 h, obtaining a solution 0.5 M of **int-2**.

In another 25 mL oven-dried reaction flask was added carbazole **2-c** (1.25 g, 6 mmol, 2 eq) in dry THF (6 mL) under argon flow. The potassium bis(trimethylsilyl)amide (KHMDs) (2 eq, 0.5 M) was therefore added dropwise and the mixture was stirred at room temperature for 1 h, obtaining **int-3**. The **int-2** (1 eq) was added dropwise to the **int-3** (1 eq) and the mixture was refluxed 4 hours under argon flow. After cooling to room temperature, the solvent was removed and the residue was dissolved in DCM, then was filtered on Celite<sup>®</sup>. The product was purified by chromatography separation on silica gel column with *n*-hexane and DCM (7:3) as eluent. Evaporated the solvents, a white solid was obtained. The two diastereoisomers E/Z have been purified by CSP-HPLC with AD-H column and 99:1 *n*-hexane/*i*-propanol (flow = 10 mL/min).

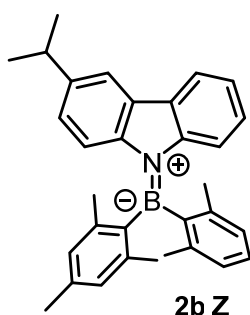

First eluted HPLC AD-H, Compound **2b Z** Yield: 25%

**<sup>1</sup>H NMR (600 MHz, Methylene Chloride-*d*<sub>2</sub>, 5.33 ppm, -10 °C)** δ 7.98 (dd, *J* = 7.6, 1.3 Hz, 1H), 7.84 (d, *J* = 1.9 Hz, 1H), 7.25 (td, *J* = 7.5, 3.0 Hz, 2H), 7.03 (ddd, *J* = 8.4, 7.1, 1.4 Hz, 1H), 7.00 (d, *J* = 7.6 Hz, 2H), 6.96 (dd, *J* = 8.6, 1.9 Hz, 1H), 6.87 – 6.82 (m, 3H), 6.81 (d, *J* = 8.5 Hz, 1H), 3.01 (hept, *J* = 7.0 Hz, 1H), 2.33 (s, 3H), 2.02 (d, *J* = 11.4 Hz, 11H), 1.29 (d, *J* = 6.9 Hz, 6H).

**<sup>13</sup>C NMR (151 MHz, Methylene Chloride-*d*<sub>2</sub>, 53.52 ppm, -10 °C)** 143.47 (Cq), 143.16 (Cq), 141.19 (Cq), 140.77 (Cq), 140.61 (Cq), 139.22 (Cq), 137.61 (Cq-B), 129.16 (CH), 128.50 (CH), 128.05 (Cq), 127.80 (Cq), 127.51 (CH), 125.83 (CH), 125.04 (CH), 122.56 (CH), 119.25 (CH), 116.67 (CH), 115.17 (CH), 114.85 (CH), 33.77 (CH), 24.02 (CH<sub>3</sub>), 21.62 (CH<sub>3</sub>), 21.52 (CH<sub>3</sub>), 20.95 (CH<sub>3</sub>).

**<sup>11</sup>B NMR (192 MHz, Methylene Chloride-*d*<sub>2</sub>, ref. BF<sub>3</sub>Et<sub>2</sub>O, -10 °C)** δ 51.72.

**HRMS(ESI-QTOF).** Calcd. for C<sub>32</sub>H<sub>35</sub>BN<sup>+</sup> [M+H]<sup>+</sup> 444.28571. Found C<sub>32</sub>H<sub>35</sub>BN<sup>+</sup> [M+H]<sup>+</sup>: 444.2862.

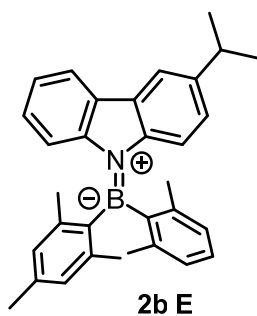

Second eluted HPLC AD-H, Compound **2b E** Yield: 25%.

**<sup>1</sup>H NMR (600 MHz, Methylene Chloride-*d*<sub>2</sub>, 5.33 ppm, -10 °C)** 7.98 (dd, *J* = 7.9, 1.2 Hz, 1H), 7.84 (d, *J* = 1.9 Hz, 1H), 7.25 (td, *J* = 7.5, 4.5 Hz, 2H), 7.09 – 7.03 (m, 1H), 7.01 (d, *J* = 7.7 Hz, 3H), 6.96 – 6.88 (m, 3H), 6.84 (s, 2H), 6.73 (d, *J* = 8.6 Hz, 1H), 2.99 (h, *J* = 6.9 Hz, 1H), 2.32 (s, 3H), 2.05 (s, 7H), 2.00 (s, 6H), 1.28 (d, *J* = 6.9 Hz, 6H).

**<sup>13</sup>C NMR (151 MHz, Methylene Chloride-*d*<sub>2</sub>, 53.52 ppm, -10 °C)** δ 143.46 (Cq), 143.22 (Cq), 141.14 (Cq), 140.78 (Cq), 140.61 (Cq), 139.25 (Cq), 137.54 (Cq-B), 129.15 (CH), 128.53 (CH), 128.04 (Cq), 127.83 (Cq), 127.50 (CH), 125.85 (CH), 125.03 (CH), 122.57 (CH), 119.24 (CH), 116.69 (CH), 115.23 (CH), 114.81 (CH), 33.77 (CH), 24.02 (CH<sub>3</sub>), 21.63 (CH<sub>3</sub>), 21.53 (CH<sub>3</sub>), 20.95 (CH<sub>3</sub>).

**<sup>11</sup>B NMR (192 MHz, Methylene Chloride-*d*<sub>2</sub>, ref. BF<sub>3</sub>Et<sub>2</sub>O, -10 °C)** δ 51.83.

**HRMS(ESI-QTOF).** Calcd. for C<sub>32</sub>H<sub>35</sub>BN<sup>+</sup> [M+H]<sup>+</sup> 444.28571. Found C<sub>32</sub>H<sub>35</sub>BN<sup>+</sup> [M+H]<sup>+</sup>: 444.2853.

## Synthesis of compounds 5-8

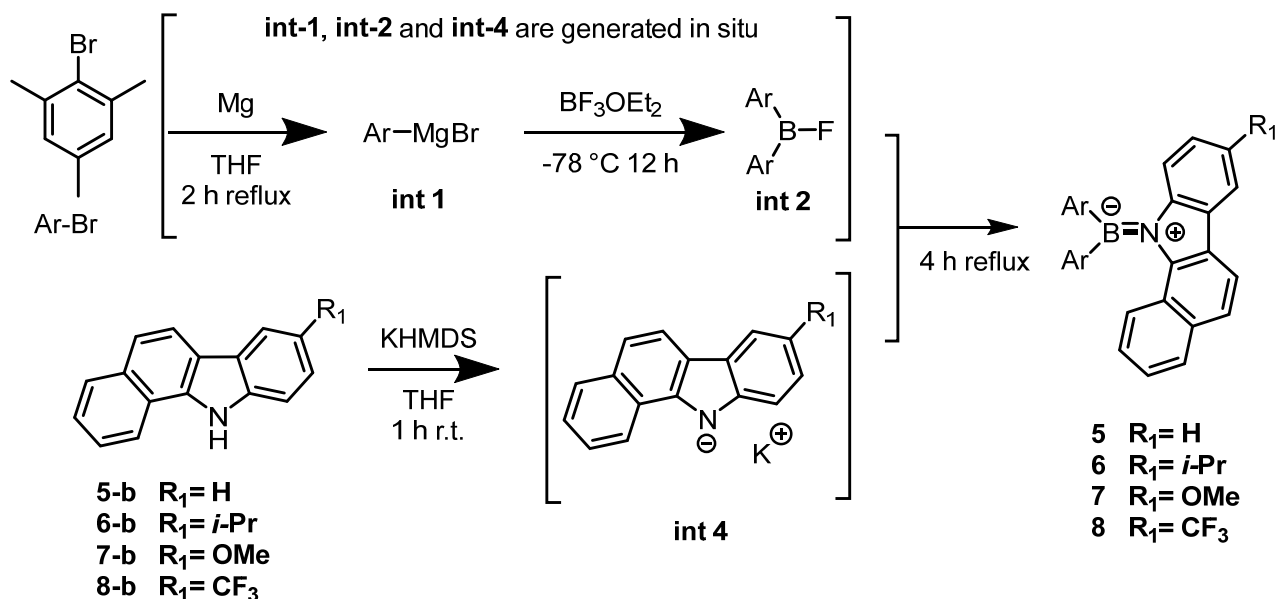

Scheme S5.

The compounds **5-8** were prepared with the same general procedure to synthesize compounds **1-4** using benzo[*a*]carbazole instead of carbazole.

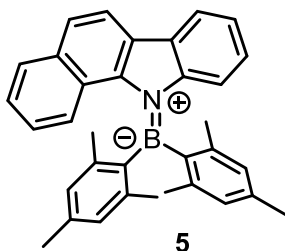

Compound **5** was synthesized starting with benzo[*a*]carbazole **5-b**. Yield: 51%.

**<sup>1</sup>H NMR (600 MHz, Methylene Chloride-*d*<sub>2</sub>, 5.33 ppm, 0 °C)** δ 8.14 (d, *J* = 8.4 Hz, 1H), 8.09 (dt, *J* = 7.8, 1.1 Hz, 1H), 8.03 (dd, *J* = 8.5, 1.1 Hz, 1H), 7.87 (dd, *J* = 8.2, 1.3 Hz, 1H), 7.80 (d, *J* = 8.3 Hz, 1H), 7.33 – 7.26 (m, 2H), 7.13 (dddd, *J* = 20.4, 8.5, 6.9, 1.4 Hz, 2H), 6.99 (s, 1H), 6.95 – 6.89 (m, 2H), 6.79 (s, 1H), 6.29 (s, 1H), 2.52 (s, 3H), 2.40 (s, 3H), 2.34 (s, 3H), 2.09 (s, 3H), 1.79 (s, 3H), 0.94 (s, 3H).

**<sup>13</sup>C NMR (151 MHz, Methylene Chloride-*d*<sub>2</sub>, 53.52 ppm, 0 °C)** δ 142.86 (Cq), 142.66 (Cq), 141.29 (Cq), 141.14 (Cq), 140.84 (Cq), 140.03 (Cq), 139.85 (Cq), 139.82 (Cq-B, broad), 139.35 (Cq), 139.00 (Cq-B, broad), 133.06 (Cq), 129.17 (CH), 129.00 (CH), 128.69 (CH), 128.22 (CH), 128.04 (CH), 127.91 (Cq), 125.81 (CH), 125.52 (CH), 125.27 (Cq), 124.28 (CH), 124.13 (CH), 123.71 (Cq),

123.70 (CH), 122.22 (CH), 119.19 (CH), 118.09 (CH), 114.50 (CH), 22.83 (CH<sub>3</sub>), 22.71 (CH<sub>3</sub>), 21.99 (CH<sub>3</sub>), 21.16 (CH<sub>3</sub>), 20.77 (CH<sub>3</sub>), 19.88 (CH<sub>3</sub>).

**<sup>11</sup>B NMR (192 MHz, Methylene Chloride-*d*<sub>2</sub>, ref. BF<sub>3</sub>Et<sub>2</sub>O, +25 °C)** δ 54.67.

**HRMS(ESI-QTOF).** Calcd. for C<sub>34</sub>H<sub>32</sub>BNNa<sup>+</sup> [M+Na]<sup>+</sup> 488.25200. Found C<sub>34</sub>H<sub>32</sub>BNNa<sup>+</sup> [M+Na]<sup>+</sup>: 488.2524.

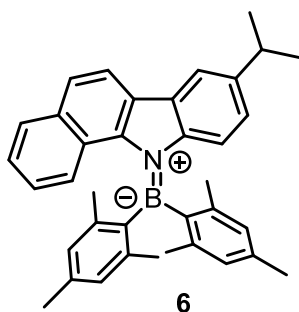

Compound **6** was synthesized starting with carbazole **6-b**. Yield: 54%.

**<sup>1</sup>H NMR (600 MHz, Methylene Chloride-*d*<sub>2</sub>, 5.33 ppm, +25 °C)** δ 8.13 (d, *J* = 8.4 Hz, 1H), 8.02 (dd, *J* = 8.6, 1.0 Hz, 1H), 7.92 (d, *J* = 1.9 Hz, 1H), 7.88 – 7.83 (m, 1H), 7.78 (d, *J* = 8.3 Hz, 1H), 7.27 (ddd, *J* = 8.0, 6.8, 1.1 Hz, 1H), 7.12 (ddd, *J* = 8.3, 6.8, 1.3 Hz, 1H), 7.03 – 6.98 (m, 2H), 6.93 (s, 1H), 6.81 – 6.77 (m, 2H), 6.29 (s, 1H), 3.06 (hept, *J* = 6.9 Hz, 1H), 2.53 (s, 3H), 2.41 (s, 3H), 2.35 (s, 3H), 2.10 (s, 3H), 1.82 (s, 3H), 1.34 (d, *J* = 6.9, 3H), 1.33 (d, *J* = 6.9, 3H), 0.98 (s, 3H).

**<sup>13</sup>C NMR (151 MHz, Methylene Chloride-*d*<sub>2</sub>, 53.52 ppm, +25 °C)** δ 143.15 (Cq), 143.00 (Cq), 141.45 (Cq), 141.37 (Cq), 141.35 (Cq), 141.09 (Cq), 140.90 (Cq), 140.30 (Cq), 140.20 (Cq-B, broad), 140.04 (Cq), 139.43 (Cq), 139.32 (Cq-B, broad), 133.24 (Cq), 129.26 (CH), 129.17 (CH), 128.80 (CH), 128.32 (CH), 128.22 (CH), 128.18 (Cq), 125.71 (Cq), 125.63 (CH), 124.93 (CH), 124.27 (CH), 124.20 (CH), 124.08, 123.73 (CH), 118.16 (CH), 116.54 (CH), 114.51 (CH), 34.02 (CH), 24.29 (CH<sub>3</sub>), 24.18 (CH<sub>3</sub>), 22.90 (CH<sub>3</sub>), 22.80 (CH<sub>3</sub>), 22.09 (CH<sub>3</sub>), 21.24 (CH<sub>3</sub>), 20.85 (CH<sub>3</sub>), 20.12 (CH<sub>3</sub>).

**<sup>11</sup>B NMR (192 MHz, Methylene Chloride-*d*<sub>2</sub>, ref. BF<sub>3</sub>Et<sub>2</sub>O, +25 °C)** δ 54.64.

**HRMS(ESI-QTOF).** Calcd. for C<sub>37</sub>H<sub>38</sub>BNNa<sup>+</sup> [M+Na]<sup>+</sup> 530.29895. Found C<sub>37</sub>H<sub>38</sub>BNNa<sup>+</sup> [M+H]<sup>+</sup>: 530.2996.

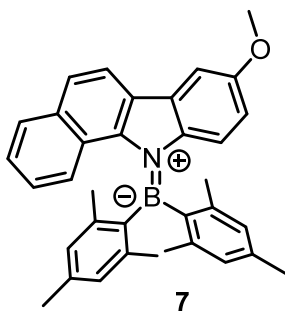

Compound **7** was prepared starting with carbazole **7-b**. Yield: 65%.

**<sup>1</sup>H NMR (600 MHz, Tetrachloroethane-*d*<sub>2</sub>, 6 ppm, +25 °C)** δ 8.09 (d, *J* = 8.4 Hz, 1H), 8.00 (d, *J* = 8.5 Hz, 1H), 7.85 (dd, *J* = 8.3, 1.2 Hz, 1H), 7.77 (d, *J* = 8.5 Hz, 1H), 7.51 (d, *J* = 2.6 Hz, 1H), 7.28 (ddd, *J* = 8.0, 6.7, 1.1 Hz, 1H), 7.14 (ddd, *J* = 8.2, 6.8, 1.3 Hz, 1H), 6.95 (s, 1H), 6.89 (s, 1H), 6.77 (d, *J* = 9.2 Hz, 1H), 6.74 (s, 1H), 6.72 (dd, *J* = 9.2, 2.6 Hz, 1H), 6.24 (s, 1H), 3.91 (s, 3H), 2.51 (s, 3H), 2.39 (s, 3H), 2.32 (s, 3H), 2.08 (s, 3H), 1.79 (s, 3H), 0.96 (s, 3H).

**<sup>13</sup>C NMR (151 MHz, Tetrachloroethane-*d*<sub>2</sub>, 73.78 ppm, +25 °C)** δ 154.92 (Cq), 142.54 (Cq), 141.11 (Cq), 140.85 (Cq), 140.70 (Cq), 140.53 (Cq), 139.62 (Cq), 139.52 (Cq-B, broad), 138.99 (Cq), 138.65 (Cq-B, broad), 137.08 (Cq), 132.72 (Cq), 129.07 (CH), 128.92 (CH), 128.56 (CH), 128.01 (Cq), 128.00 (2 CH), 125.34 (CH), 125.03 (Cq), 124.36 (CH), 123.88 (CH), 123.80 (CH), 123.69 (Cq), 118.12 (CH), 115.51 (CH), 113.80 (CH), 101.76 (CH), 53.89 (CH<sub>3</sub>), 23.11 (CH<sub>3</sub>), 23.01 (CH<sub>3</sub>), 22.34 (CH<sub>3</sub>), 21.54 (CH<sub>3</sub>), 21.13 (CH<sub>3</sub>), 20.22 (CH<sub>3</sub>).

**<sup>11</sup>B NMR (192 MHz, Tetrachloroethane-*d*<sub>2</sub>, ref. BF<sub>3</sub>Et<sub>2</sub>O, +25 °C)** δ 54.57.

**HRMS(ESI-QTOF).** Calcd. for C<sub>35</sub>H<sub>34</sub>BNONa<sup>+</sup> [M+Na]<sup>+</sup> 518.26257. Found C<sub>35</sub>H<sub>34</sub>BNONa<sup>+</sup> [M+Na]<sup>+</sup>: 518.2629.



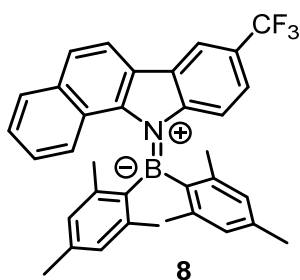

Compound **8** was synthesized starting with carbazole **8-b**. Yield: 31%

**<sup>1</sup>H NMR (600 MHz, Methylene Chloride-*d*<sub>2</sub>, 5.33 ppm, +25 °C)** δ 8.39 – 8.36 (m, 1H), 8.17 (d, *J* = 8.5 Hz, 1H), 8.06 (d, *J* = 8.5 Hz, 1H), 7.90 (dd, *J* = 8.2, 1.3 Hz, 1H), 7.85 (d, *J* = 8.4 Hz, 1H), 7.40 – 7.31 (m, 2H), 7.19 (ddd, *J* = 8.3, 6.8, 1.3 Hz, 1H), 7.05 – 6.99 (m, 2H), 6.97 (s, 1H), 6.82 (s, 1H), 6.30 (s, 1H), 2.50 (s, 3H), 2.41 (s, 3H), 2.37 (s, 3H), 2.10 (s, 3H), 1.84 (s, 3H), 0.95 (s, 3H).

**<sup>13</sup>C NMR (151 MHz, Methylene Chloride-*d*<sub>2</sub>, 53.52 ppm, +25 °C)** δ 144.58 (Cq), 143.26 (Cq), 141.77 (Cq), 141.40 (Cq), 141.05 (Cq), 140.77 (Cq), 140.00 (Cq), 139.64 (Cq-B, broad), 138.79 (Cq-B, broad), 133.71 (Cq), 129.55 (CH), 129.32 (CH), 129.13 (CH), 128.51 (CH), 128.44 (CH), 128.06 (Cq), 125.62 (CH), 125.12 (Cq, q, *J*<sub>1-CF</sub> = 271.8 Hz), 125.01 (CH), 124.91 (CH), 124.67 (Cq), 124.21 (Cq, q, *J*<sub>2-CF</sub> = 31.7 Hz), 124.19 (CH), 123.81, 122.48 (CH, q, *J*<sub>3-CF</sub> = 3.0 Hz), 118.02 (CH), 116.78 (CH, q, *J*<sub>3-CF</sub> = 3.0 Hz), 115.08 (CH), 22.90 (CH<sub>3</sub>), 22.87 (CH<sub>3</sub>), 22.16 (CH<sub>3</sub>), 21.26 (CH<sub>3</sub>), 20.87 (CH<sub>3</sub>), 20.02 (CH<sub>3</sub>).

**<sup>11</sup>B NMR (192 MHz, Methylene Chloride-*d*<sub>2</sub>, ref. BF<sub>3</sub>Et<sub>2</sub>O, +25 °C)** δ 55.95

**<sup>19</sup>F NMR (376 MHz, Methylene Chloride-*d*<sub>2</sub>, ref. BF<sub>3</sub>Et<sub>2</sub>O, +25 °C)** δ -61.27.

**HRMS(ESI-QTOF).** Calcd. for C<sub>35</sub>H<sub>31</sub>BF<sub>3</sub>NNa<sup>+</sup> [M+Na]<sup>+</sup> 556.23939. Found C<sub>35</sub>H<sub>31</sub>BF<sub>3</sub>NNa<sup>+</sup> [M+Na]<sup>+</sup>: 556.2389.

<sup>1</sup> F. Xiao, Y. Liao, M. Wu, G.-J. Deng *Green Chem.* **2012**, *14*, 3277–3280.

<sup>2</sup> T. Taniguchi, J. Wang, S. Irle, S. Yamaguchi *Dalton Trans.*, **2013**, *42*, 620.

## Crystal data for 2

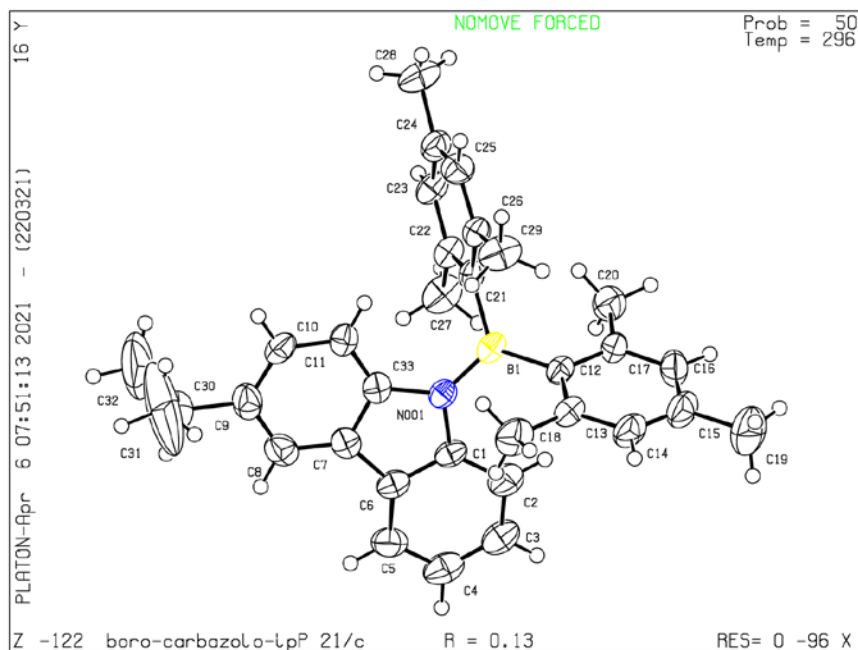

A specimen of  $C_{33}H_{36}BN$ , approximate dimensions 0.150 mm x 0.220 mm x 0.250 mm, was used for the X-ray crystallographic analysis. The X-ray intensity data were measured. The total exposure time was 24.67 hours. The frames were integrated with the Bruker SAINT software package using a narrow-frame algorithm. The integration of the data using a monoclinic unit cell yielded a total of 22831 reflections to a maximum  $\theta$  angle of 24.92 (0.84 Å resolution), of which 4495 were independent (average redundancy 5.079, completeness = 96.6%,  $R_{int} = 11.53\%$ ,  $R_{sig} = 9.95\%$ ) and 3004 (66.83%) were greater than  $2\sigma(F^2)$ . The final cell constants of  $a = 9.81(5)$  Å,  $b = 11.79(5)$  Å,  $c = 23.06(10)$  Å,  $\beta = 92.61(10)$ , volume = 2660.(20) Å<sup>3</sup>, are based upon the refinement of the XYZ-centroids of 6219 reflections above  $20 \sigma(I)$  with  $4.94 < 2\theta < 49.62$ . Data were corrected for absorption effects using the Multi-Scan method (SADABS). The ratio of minimum to maximum apparent transmission was 0.945. The calculated minimum and maximum transmission coefficients (based on crystal size) are 0.9840 and 0.9900. The structure was solved and refined using the Bruker SHELXTL Software Package, using the space group  $P 1 21/c 1$ , with  $Z = 4$  for the formula unit,  $C_{33}H_{36}BN$ . The final anisotropic full-matrix least-squares refinement on  $F^2$  with 324 variables converged at  $R1 = 13.19\%$ , for the observed data and  $wR2 = 28.58\%$  for all data. The goodness-of-fit was 1.184. The largest peak in the final difference electron density synthesis was 0.337 e/Å<sup>3</sup> and the largest hole was -0.284 e/Å<sup>3</sup> with an RMS deviation of 0.059 e/Å<sup>3</sup>. On the basis of the final model, the calculated density was 1.140 g/cm<sup>3</sup> and  $F(000)$ , 984 e<sup>-</sup>. CCDC deposition number: 2080360.

## Table 1. Sample and crystal data

|                        |                                    |                           |
|------------------------|------------------------------------|---------------------------|
| Identification code    | mazza1907                          |                           |
| Chemical formula       | C <sub>33</sub> H <sub>36</sub> BN |                           |
| Formula weight         | 457.44 g/mol                       |                           |
| Temperature            | 296(2) K                           |                           |
| Wavelength             | 0.71073 Å                          |                           |
| Crystal size           | 0.150 x 0.220 x 0.250 mm           |                           |
| Crystal system         | monoclinic                         |                           |
| Space group            | P 1 21/c 1                         |                           |
| Unit cell dimensions   | a = 9.81(5) Å                      | $\alpha = 90^\circ$       |
|                        | b = 11.79(5) Å                     | $\beta = 92.61(10)^\circ$ |
|                        | c = 23.06(10) Å                    | $\gamma = 90^\circ$       |
| Volume                 | 2660.(20) Å <sup>3</sup>           |                           |
| Z                      | 4                                  |                           |
| Density (calculated)   | 1.140 g/cm <sup>3</sup>            |                           |
| Absorption coefficient | 0.064 mm <sup>-1</sup>             |                           |
| F(000)                 | 984                                |                           |

## Table 2. Data collection and structure refinement

|                                     |                                             |
|-------------------------------------|---------------------------------------------|
| Theta range for data collection     | 1.94 to 24.92°                              |
| Index ranges                        | -11<=h<=11, -13<=k<=13, -27<=l<=27          |
| Reflections collected               | 22831                                       |
| Independent reflections             | 4495 [R(int) = 0.1153]                      |
| Coverage of independent reflections | 96.6%                                       |
| Absorption correction               | Multi-Scan                                  |
| Max. and min. transmission          | 0.9900 and 0.9840                           |
| Structure solution technique        | direct methods                              |
| Structure solution program          | XT, VERSION 2014/5                          |
| Refinement method                   | Full-matrix least-squares on F <sup>2</sup> |
| Refinement program                  | SHELXL-2014/7 (Sheldrick, 2014)             |

|                                         |                                                                                                                                                               |                    |        |
|-----------------------------------------|---------------------------------------------------------------------------------------------------------------------------------------------------------------|--------------------|--------|
| <b>Function minimized</b>               | $\Sigma w(F_o^2 - F_c^2)^2$                                                                                                                                   |                    |        |
| <b>Data / restraints / parameters</b>   | 4495 / 0 / 324                                                                                                                                                |                    |        |
| <b>Goodness-of-fit on F<sup>2</sup></b> | 1.184                                                                                                                                                         |                    |        |
| <b>Final R indices</b>                  | 3004 data;<br>I>2σ(I)                                                                                                                                         | R1 = 0.1319, wR2 = | 0.2645 |
|                                         | all data                                                                                                                                                      | R1 = 0.1913, wR2 = | 0.2858 |
| <b>Weighting scheme</b>                 | w=1/[σ <sup>2</sup> (F <sub>o</sub> <sup>2</sup> )+(0.0499P) <sup>2</sup> +9.5587P]<br>where P=(F <sub>o</sub> <sup>2</sup> +2F <sub>c</sub> <sup>2</sup> )/3 |                    |        |
| <b>Largest diff. peak and hole</b>      | 0.337 and -0.284 eÅ <sup>-3</sup>                                                                                                                             |                    |        |
| <b>R.M.S. deviation from mean</b>       | 0.059 eÅ <sup>-3</sup>                                                                                                                                        |                    |        |

### Table 3. Atomic coordinates and equivalent isotropic atomic displacement parameters (Å<sup>2</sup>)

U(eq) is defined as one third of the trace of the orthogonalized U<sub>ij</sub> tensor.

|      | x/a       | y/b       | z/c         | U(eq)      |
|------|-----------|-----------|-------------|------------|
| N001 | 0.2761(4) | 0.2575(4) | 0.49871(19) | 0.0351(11) |
| C1   | 0.1436(5) | 0.2281(5) | 0.4773(2)   | 0.0367(13) |
| C33  | 0.3608(6) | 0.2497(4) | 0.4513(2)   | 0.0355(13) |
| C21  | 0.4636(5) | 0.2446(4) | 0.5795(2)   | 0.0335(13) |
| C6   | 0.1444(6) | 0.2059(4) | 0.4190(3)   | 0.0394(14) |
| C13  | 0.1629(5) | 0.4539(5) | 0.5778(3)   | 0.0408(14) |
| C26  | 0.5648(5) | 0.3197(5) | 0.6005(2)   | 0.0357(13) |
| C12  | 0.2162(5) | 0.3479(5) | 0.5963(2)   | 0.0355(13) |
| C7   | 0.2830(6) | 0.2229(4) | 0.4018(2)   | 0.0388(14) |
| C22  | 0.4932(5) | 0.1286(4) | 0.5789(2)   | 0.0368(13) |
| C17  | 0.1836(6) | 0.3099(5) | 0.6508(3)   | 0.0436(15) |
| C11  | 0.4985(6) | 0.2745(5) | 0.4479(2)   | 0.0395(14) |
| C23  | 0.6215(6) | 0.0910(5) | 0.5993(3)   | 0.0430(15) |
| C14  | 0.0779(6) | 0.5138(6) | 0.6122(3)   | 0.0537(17) |
| C5   | 0.0263(6) | 0.1688(5) | 0.3896(3)   | 0.0531(17) |
| C24  | 0.7215(6) | 0.1640(5) | 0.6190(3)   | 0.0448(15) |

|     | <b>x/a</b> | <b>y/b</b> | <b>z/c</b> | <b>U(eq)</b> |
|-----|------------|------------|------------|--------------|
| C25 | 0.6919(6)  | 0.2779(5)  | 0.6190(3)  | 0.0455(15)   |
| C10 | 0.5535(6)  | 0.2690(5)  | 0.3951(3)  | 0.0451(15)   |
| C9  | 0.4811(7)  | 0.2404(6)  | 0.3449(3)  | 0.0529(17)   |
| C8  | 0.3425(7)  | 0.2173(5)  | 0.3489(3)  | 0.0502(16)   |
| C27 | 0.3922(6)  | 0.0413(5)  | 0.5577(3)  | 0.0562(18)   |
| C16 | 0.0967(6)  | 0.3727(6)  | 0.6837(3)  | 0.0565(18)   |
| C2  | 0.0260(6)  | 0.2151(6)  | 0.5074(3)  | 0.0537(17)   |
| C15 | 0.0440(7)  | 0.4758(6)  | 0.6648(3)  | 0.0576(18)   |
| C4  | 0.9099(7)  | 0.1557(6)  | 0.4193(3)  | 0.0580(18)   |
| C29 | 0.5399(7)  | 0.4445(5)  | 0.6021(3)  | 0.0589(19)   |
| B1  | 0.3162(6)  | 0.2828(5)  | 0.5574(3)  | 0.0338(15)   |
| C20 | 0.2338(7)  | 0.1967(6)  | 0.6741(3)  | 0.0563(18)   |
| C3  | 0.9105(6)  | 0.1777(6)  | 0.4773(3)  | 0.0583(18)   |
| C18 | 0.1955(7)  | 0.5044(6)  | 0.5205(3)  | 0.0624(19)   |
| C28 | 0.8565(7)  | 0.1193(7)  | 0.6421(3)  | 0.076(2)     |
| C30 | 0.5433(8)  | 0.2355(7)  | 0.2867(3)  | 0.073(2)     |
| C19 | 0.9498(9)  | 0.5415(8)  | 0.7021(4)  | 0.094(3)     |
| C31 | 0.5997(17) | 0.3458(12) | 0.2714(5)  | 0.206(8)     |
| C32 | 0.6425(16) | 0.1431(14) | 0.2825(5)  | 0.209(9)     |

#### **Table 4. Bond lengths (Å)**

|          |           |         |           |
|----------|-----------|---------|-----------|
| N001-C33 | 1.407(8)  | N001-C1 | 1.412(9)  |
| N001-B1  | 1.423(10) | C1-C6   | 1.371(10) |
| C1-C2    | 1.381(9)  | C33-C7  | 1.381(9)  |
| C33-C11  | 1.388(10) | C21-C22 | 1.398(9)  |
| C21-C26  | 1.401(8)  | C21-B1  | 1.577(10) |
| C6-C5    | 1.386(9)  | C6-C7   | 1.447(10) |
| C13-C14  | 1.373(9)  | C13-C12 | 1.414(9)  |
| C13-C18  | 1.496(10) | C26-C25 | 1.390(9)  |
| C26-C29  | 1.493(10) | C12-C17 | 1.384(9)  |
| C12-B1   | 1.562(9)  | C7-C8   | 1.377(10) |
| C22-C23  | 1.396(9)  | C22-C27 | 1.496(9)  |
| C17-C16  | 1.384(9)  | C17-C20 | 1.513(10) |
| C11-C10  | 1.355(9)  | C11-H11 | 0.93      |
| C23-C24  | 1.368(9)  | C23-H23 | 0.93      |
| C14-C15  | 1.348(10) | C14-H14 | 0.93      |

|          |           |          |           |
|----------|-----------|----------|-----------|
| C5-C4    | 1.368(10) | C5-H5    | 0.93      |
| C24-C25  | 1.375(10) | C24-C28  | 1.501(10) |
| C25-H25  | 0.93      | C10-C9   | 1.372(10) |
| C10-H10  | 0.93      | C9-C8    | 1.393(11) |
| C9-C30   | 1.502(11) | C8-H8    | 0.93      |
| C27-H27A | 0.96      | C27-H27B | 0.96      |
| C27-H27C | 0.96      | C16-C15  | 1.384(11) |
| C16-H16  | 0.93      | C2-C3    | 1.374(10) |
| C2-H2    | 0.93      | C15-C19  | 1.505(10) |
| C4-C3    | 1.362(11) | C4-H4    | 0.93      |
| C29-H29A | 0.96      | C29-H29B | 0.96      |
| C29-H29C | 0.96      | C20-H20A | 0.96      |
| C20-H20B | 0.96      | C20-H20C | 0.96      |
| C3-H3    | 0.93      | C18-H18A | 0.96      |
| C18-H18B | 0.96      | C18-H18C | 0.96      |
| C28-H28A | 0.96      | C28-H28B | 0.96      |
| C28-H28C | 0.96      | C30-C31  | 1.462(14) |
| C30-C32  | 1.467(13) | C30-H30  | 0.98      |
| C19-H19A | 0.96      | C19-H19B | 0.96      |
| C19-H19C | 0.96      | C31-H31A | 0.96      |
| C31-H31B | 0.96      | C31-H31C | 0.96      |
| C32-H32A | 0.96      | C32-H32B | 0.96      |
| C32-H32C | 0.96      |          |           |

### Table 5. Bond angles (°)

|              |          |             |          |
|--------------|----------|-------------|----------|
| C33-N001-C1  | 106.2(5) | C33-N001-B1 | 127.2(5) |
| C1-N001-B1   | 126.4(5) | C6-C1-C2    | 120.9(5) |
| C6-C1-N001   | 110.1(5) | C2-C1-N001  | 129.0(6) |
| C7-C33-C11   | 120.3(6) | C7-C33-N001 | 109.5(6) |
| C11-C33-N001 | 129.9(5) | C22-C21-C26 | 118.5(5) |
| C22-C21-B1   | 117.7(5) | C26-C21-B1  | 123.8(5) |
| C1-C6-C5     | 119.8(6) | C1-C6-C7    | 106.9(5) |
| C5-C6-C7     | 133.2(6) | C14-C13-C12 | 120.4(6) |
| C14-C13-C18  | 117.8(6) | C12-C13-C18 | 121.9(5) |
| C25-C26-C21  | 119.6(6) | C25-C26-C29 | 119.2(5) |
| C21-C26-C29  | 121.2(6) | C17-C12-C13 | 117.6(5) |
| C17-C12-B1   | 122.6(5) | C13-C12-B1  | 119.6(5) |

|                   |          |                   |          |
|-------------------|----------|-------------------|----------|
| C8-C7-C33         | 120.1(6) | C8-C7-C6          | 132.7(6) |
| C33-C7-C6         | 107.2(6) | C23-C22-C21       | 119.5(5) |
| C23-C22-C27       | 117.7(6) | C21-C22-C27       | 122.8(6) |
| C16-C17-C12       | 119.9(6) | C16-C17-C20       | 118.4(6) |
| C12-C17-C20       | 121.6(5) | C10-C11-C33       | 118.0(6) |
| C10-C11-H11       | 121.0    | C33-C11-H11       | 121.0    |
| C24-C23-C22       | 122.3(6) | C24-C23-H23       | 118.9    |
| C22-C23-H23       | 118.9    | C15-C14-C13       | 122.0(7) |
| C15-C14-H14       | 119.0    | C13-C14-H14       | 119.0    |
| C4-C5-C6          | 119.3(7) | C4-C5-H5          | 120.3    |
| C6-C5-H5          | 120.3    | C23-C24-C25       | 117.8(6) |
| C23-C24-C28       | 120.4(7) | C25-C24-C28       | 121.7(6) |
| C24-C25-C26       | 122.2(6) | C24-C25-H25       | 118.9    |
| C26-C25-H25       | 118.9    | C11-C10-C9        | 123.9(7) |
| C11-C10-H10       | 118.1    | C9-C10-H10        | 118.1    |
| C10-C9-C8         | 117.5(6) | C10-C9-C30        | 123.2(7) |
| C8-C9-C30         | 119.3(6) | C7-C8-C9          | 120.2(6) |
| C7-C8-H8          | 119.9    | C9-C8-H8          | 119.9    |
| C22-C27-H27A      | 109.5    | C22-C27-H27B      | 109.5    |
| H27A-C27-<br>H27B | 109.5    | C22-C27-H27C      | 109.5    |
| H27A-C27-<br>H27C | 109.5    | H27B-C27-<br>H27C | 109.5    |
| C17-C16-C15       | 121.9(7) | C17-C16-H16       | 119.1    |
| C15-C16-H16       | 119.1    | C3-C2-C1          | 118.2(7) |
| C3-C2-H2          | 120.9    | C1-C2-H2          | 120.9    |
| C14-C15-C16       | 118.1(6) | C14-C15-C19       | 121.7(7) |
| C16-C15-C19       | 120.1(7) | C3-C4-C5          | 120.3(6) |
| C3-C4-H4          | 119.9    | C5-C4-H4          | 119.9    |
| C26-C29-H29A      | 109.5    | C26-C29-H29B      | 109.5    |
| H29A-C29-<br>H29B | 109.5    | C26-C29-H29C      | 109.5    |
| H29A-C29-<br>H29C | 109.5    | H29B-C29-<br>H29C | 109.5    |
| N001-B1-C12       | 119.7(5) | N001-B1-C21       | 117.2(5) |
| C12-B1-C21        | 123.1(6) | C17-C20-H20A      | 109.5    |
| C17-C20-H20B      | 109.5    | H20A-C20-<br>H20B | 109.5    |

|                   |           |                   |          |
|-------------------|-----------|-------------------|----------|
| C17-C20-H20C      | 109.5     | H20A-C20-<br>H20C | 109.5    |
| H20B-C20-<br>H20C | 109.5     | C4-C3-C2          | 121.5(6) |
| C4-C3-H3          | 119.2     | C2-C3-H3          | 119.2    |
| C13-C18-H18A      | 109.5     | C13-C18-H18B      | 109.5    |
| H18A-C18-<br>H18B | 109.5     | C13-C18-H18C      | 109.5    |
| H18A-C18-<br>H18C | 109.5     | H18B-C18-<br>H18C | 109.5    |
| C24-C28-H28A      | 109.5     | C24-C28-H28B      | 109.5    |
| H28A-C28-<br>H28B | 109.5     | C24-C28-H28C      | 109.5    |
| H28A-C28-<br>H28C | 109.5     | H28B-C28-<br>H28C | 109.5    |
| C31-C30-C32       | 112.7(11) | C31-C30-C9        | 110.9(7) |
| C32-C30-C9        | 112.6(7)  | C31-C30-H30       | 106.8    |
| C32-C30-H30       | 106.8     | C9-C30-H30        | 106.8    |
| C15-C19-H19A      | 109.5     | C15-C19-H19B      | 109.5    |
| H19A-C19-<br>H19B | 109.5     | C15-C19-H19C      | 109.5    |
| H19A-C19-<br>H19C | 109.5     | H19B-C19-<br>H19C | 109.5    |
| C30-C31-H31A      | 109.5     | C30-C31-H31B      | 109.5    |
| H31A-C31-<br>H31B | 109.5     | C30-C31-H31C      | 109.5    |
| H31A-C31-<br>H31C | 109.5     | H31B-C31-<br>H31C | 109.5    |
| C30-C32-H32A      | 109.5     | C30-C32-H32B      | 109.5    |
| H32A-C32-<br>H32B | 109.5     | C30-C32-H32C      | 109.5    |
| H32A-C32-<br>H32C | 109.5     | H32B-C32-<br>H32C | 109.5    |

**Table 6. Torsion angles (°)**

|                    |          |                   |           |
|--------------------|----------|-------------------|-----------|
| C33-N001-C1-<br>C6 | -1.6(6)  | B1-N001-C1-<br>C6 | -177.9(5) |
| C33-N001-C1-<br>C2 | 175.0(6) | B1-N001-C1-<br>C2 | -1.4(9)   |



|                 |          |                  |           |
|-----------------|----------|------------------|-----------|
| C1-N001-C33-C7  | 3.3(6)   | B1-N001-C33-C7   | 179.7(5)  |
| C1-N001-C33-C11 | 176.7(5) | B1-N001-C33-C11  | -7.0(9)   |
| C2-C1-C6-C5     | -0.6(9)  | N001-C1-C6-C5    | 176.2(5)  |
| C2-C1-C6-C7     | -        | N001-C1-C6-C7    | -0.7(6)   |
| C22-C21-C26-C25 | 1.3(8)   | B1-C21-C26-C25   | 180.0(5)  |
| C22-C21-C26-C29 | 179.8(5) | B1-C21-C26-C29   | -1.5(8)   |
| C14-C13-C12-C17 | -2.3(8)  | C18-C13-C12-C17  | 178.0(6)  |
| C14-C13-C12-B1  | -        | C18-C13-C12-B1   | 2.2(8)    |
| C11-C33-C7-C8   | 2.0(8)   | N001-C33-C7-C8   | 176.1(5)  |
| C11-C33-C7-C6   | -        | N001-C33-C7-C6   | -3.8(6)   |
| C1-C6-C7-C8     | -        | C5-C6-C7-C8      | 6.6(11)   |
| C1-C6-C7-C33    | 2.7(6)   | C5-C6-C7-C33     | -173.6(6) |
| C26-C21-C22-C23 | 0.2(8)   | B1-C21-C22-C23   | -178.5(5) |
| C26-C21-C22-C27 | 179.6(5) | B1-C21-C22-C27   | 0.8(8)    |
| C13-C12-C17-C16 | 2.8(8)   | B1-C12-C17-C16   | 178.6(5)  |
| C13-C12-C17-C20 | 178.9(5) | B1-C12-C17-C20   | -5.3(9)   |
| C7-C33-C11-C10  | -1.5(8)  | N001-C33-C11-C10 | -174.2(5) |
| C21-C22-C23-C24 | -1.3(9)  | C27-C22-C23-C24  | 179.3(6)  |
| C12-C13-C14-C15 | 1.1(10)  | C18-C13-C14-C15  | -179.2(6) |
| C1-C6-C5-C4     | 0.6(9)   | C7-C6-C5-C4      | 176.5(6)  |
| C22-C23-C24-C25 | 0.8(9)   | C22-C23-C24-C28  | 178.3(6)  |

|                     |               |                     |                |
|---------------------|---------------|---------------------|----------------|
| C23-C24-C25-<br>C26 | 0.8(9)        | C28-C24-C25-<br>C26 | -176.6(6)      |
| C21-C26-C25-<br>C24 | -1.9(9)       | C29-C26-C25-<br>C24 | 179.6(6)       |
| C33-C11-C10-<br>C9  | 0.0(9)        | C11-C10-C9-<br>C8   | 0.9(9)         |
| C11-C10-C9-<br>C30  | 179.5(6)      | C33-C7-C8-C9        | -1.1(9)        |
| C6-C7-C8-C9         | 178.8(6)      | C10-C9-C8-C7        | -0.4(9)        |
| C30-C9-C8-<br>C7    | -<br>179.0(6) | C12-C17-C16-<br>C15 | -2.3(9)        |
| C20-C17-C16-<br>C15 | -<br>178.5(6) | C6-C1-C2-C3         | 1.0(9)         |
| N001-C1-C2-<br>C3   | -<br>175.3(6) | C13-C14-C15-<br>C16 | -0.4(10)       |
| C13-C14-C15-<br>C19 | -<br>179.4(7) | C17-C16-C15-<br>C14 | 1.0(10)        |
| C17-C16-C15-<br>C19 | -<br>180.0(7) | C6-C5-C4-C3         | -0.8(10)       |
| C33-N001-B1-<br>C12 | 148.3(5)      | C1-N001-B1-<br>C12  | -36.1(8)       |
| C33-N001-B1-<br>C21 | -30.5(8)      | C1-N001-B1-<br>C21  | 145.1(5)       |
| C17-C12-B1-<br>N001 | 129.1(6)      | C13-C12-B1-<br>N001 | -55.2(7)       |
| C17-C12-B1-<br>C21  | -52.2(8)      | C13-C12-B1-<br>C21  | 123.5(6)       |
| C22-C21-B1-<br>N001 | -61.4(7)      | C26-C21-B1-<br>N001 | 119.9(6)       |
| C22-C21-B1-<br>C12  | 119.9(6)      | C26-C21-B1-<br>C12  | -58.8(8)       |
| C5-C4-C3-C2         | 1.2(11)       | C1-C2-C3-C4         | -1.2(10)       |
| C10-C9-C30-<br>C31  | -<br>59.5(12) | C8-C9-C30-<br>C31   | 119.1(10)      |
| C10-C9-C30-<br>C32  | 67.8(13)      | C8-C9-C30-<br>C32   | -<br>113.7(11) |

**Table 7. Anisotropic atomic displacement parameters ( $\text{\AA}^2$ ).**

The anisotropic atomic displacement factor exponent takes the form:

$$-2\pi^2 [ h^2 a^{*2} U_{11} + \dots + 2 h k a^* b^* U_{12} ]$$

|      | $U_{11}$ | $U_{22}$ | $U_{33}$ | $U_{23}$                 | $U_{13}$  | $U_{12}$  |
|------|----------|----------|----------|--------------------------|-----------|-----------|
| N001 | 0.033(2) | 0.031(3) | 0.041(3) | 0.001(2)                 | 0.005(2)  | 0.001(2)  |
| C1   | 0.028(3) | 0.032(3) | 0.050(4) | 0.005(3)                 | 0.001(3)  | -0.002(2) |
| C33  | 0.048(3) | 0.019(3) | 0.040(3) | 0.003(2)                 | 0.005(3)  | 0.008(2)  |
| C21  | 0.037(3) | 0.030(3) | 0.035(3) | 0.002(2)                 | 0.010(2)  | -0.001(2) |
| C6   | 0.037(3) | 0.028(3) | 0.053(4) | 0.002(3)                 | -0.001(3) | 0.005(2)  |
| C13  | 0.032(3) | 0.037(3) | 0.054(4) | <sup>-</sup><br>0.004(3) | 0.005(3)  | 0.001(3)  |
| C26  | 0.035(3) | 0.033(3) | 0.040(3) | 0.001(2)                 | 0.006(3)  | -0.001(2) |
| C12  | 0.030(3) | 0.033(3) | 0.043(3) | <sup>-</sup><br>0.006(2) | 0.004(2)  | 0.001(2)  |
| C7   | 0.050(4) | 0.028(3) | 0.039(3) | 0.003(2)                 | 0.002(3)  | 0.005(3)  |
| C22  | 0.036(3) | 0.027(3) | 0.048(4) | 0.000(2)                 | 0.008(3)  | -0.002(2) |
| C17  | 0.035(3) | 0.056(4) | 0.040(4) | <sup>-</sup><br>0.008(3) | 0.007(3)  | 0.003(3)  |
| C11  | 0.044(3) | 0.033(3) | 0.043(4) | 0.002(2)                 | 0.009(3)  | 0.003(3)  |
| C23  | 0.039(3) | 0.029(3) | 0.062(4) | 0.004(3)                 | 0.010(3)  | 0.008(3)  |
| C14  | 0.047(4) | 0.048(4) | 0.066(5) | <sup>-</sup><br>0.012(3) | 0.005(3)  | 0.014(3)  |
| C5   | 0.048(4) | 0.054(4) | 0.056(4) | <sup>-</sup><br>0.007(3) | -0.011(3) | 0.006(3)  |
| C24  | 0.042(3) | 0.046(4) | 0.047(4) | 0.005(3)                 | 0.007(3)  | 0.011(3)  |
| C25  | 0.038(3) | 0.050(4) | 0.049(4) | 0.001(3)                 | 0.001(3)  | -0.011(3) |
| C10  | 0.036(3) | 0.043(4) | 0.056(4) | 0.008(3)                 | 0.010(3)  | 0.010(3)  |
| C9   | 0.068(5) | 0.050(4) | 0.041(4) | 0.008(3)                 | 0.010(3)  | 0.015(3)  |
| C8   | 0.063(4) | 0.043(4) | 0.044(4) | 0.002(3)                 | -0.005(3) | 0.013(3)  |
| C27  | 0.056(4) | 0.027(3) | 0.087(5) | <sup>-</sup><br>0.002(3) | 0.008(4)  | -0.001(3) |
| C16  | 0.050(4) | 0.078(5) | 0.042(4) | <sup>-</sup><br>0.010(3) | 0.013(3)  | -0.005(4) |
| C2   | 0.038(4) | 0.059(4) | 0.065(4) | <sup>-</sup><br>0.001(3) | 0.003(3)  | -0.007(3) |
| C15  | 0.048(4) | 0.060(5) | 0.066(5) | <sup>-</sup><br>0.021(4) | 0.010(3)  | 0.009(3)  |
| C4   | 0.039(4) | 0.051(4) | 0.084(5) | <sup>-</sup><br>0.004(4) | -0.005(4) | -0.002(3) |
| C29  | 0.051(4) | 0.037(4) | 0.088(5) | <sup>-</sup><br>0.003(3) | -0.006(4) | -0.006(3) |

|     | U <sub>11</sub> | U <sub>22</sub> | U <sub>33</sub> | U <sub>23</sub>          | U <sub>13</sub>           | U <sub>12</sub>           |
|-----|-----------------|-----------------|-----------------|--------------------------|---------------------------|---------------------------|
| B1  | 0.034(3)        | 0.020(3)        | 0.048(4)        | 0.006(3)                 | 0.009(3)                  | 0.003(3)                  |
| C20 | 0.055(4)        | 0.064(5)        | 0.051(4)        | 0.011(3)                 | 0.009(3)                  | 0.004(3)                  |
| C3  | 0.035(4)        | 0.061(5)        | 0.079(5)        | 0.003(4)                 | 0.008(3)                  | -0.008(3)                 |
| C18 | 0.069(5)        | 0.043(4)        | 0.075(5)        | 0.008(3)                 | 0.007(4)                  | 0.022(3)                  |
| C28 | 0.048(4)        | 0.090(6)        | 0.091(6)        | 0.005(5)                 | -0.004(4)                 | 0.029(4)                  |
| C30 | 0.069(5)        | 0.097(6)        | 0.053(5)        | 0.001(4)                 | 0.014(4)                  | 0.014(5)                  |
| C19 | 0.096(7)        | 0.095(7)        | 0.093(6)        | <sup>-</sup><br>0.031(5) | 0.025(5)                  | 0.026(5)                  |
| C31 | 0.34(2)         | 0.196(15)       | 0.088(8)        | <sup>-</sup><br>0.029(9) | <sup>-</sup><br>0.127(11) | <sup>-</sup><br>0.126(15) |
| C32 | 0.275(18)       | 0.280(19)       | 0.076(7)        | 0.006(9)                 | 0.062(9)                  | 0.193(16)                 |

**Table 8. Hydrogen atomic coordinates and isotropic atomic displacement parameters (Å<sup>2</sup>)**

|      | x/a     | y/b     | z/c    | U(eq) |
|------|---------|---------|--------|-------|
| H11  | 0.5514  | 0.2943  | 0.4808 | 0.047 |
| H23  | 0.6395  | 0.0136  | 0.5995 | 0.052 |
| H14  | 0.0428  | 0.5828  | 0.5989 | 0.064 |
| H5   | 0.0263  | 0.1529  | 0.3501 | 0.064 |
| H25  | 0.7591  | 0.3287  | 0.6319 | 0.055 |
| H10  | 0.6457  | 0.2855  | 0.3928 | 0.054 |
| H8   | 0.2901  | 0.1981  | 0.3158 | 0.06  |
| H27A | 0.3902  | 0.0385  | 0.5160 | 0.084 |
| H27B | 0.3032  | 0.0609  | 0.5702 | 0.084 |
| H27C | 0.4182  | -0.0315 | 0.5731 | 0.084 |
| H16  | 0.0730  | 0.3449  | 0.7196 | 0.068 |
| H2   | 0.0250  | 0.2312  | 0.5468 | 0.064 |
| H4   | -0.1701 | 0.1318  | 0.3999 | 0.07  |
| H29A | 0.6192  | 0.4820  | 0.6189 | 0.088 |
| H29B | 0.4630  | 0.4599  | 0.6252 | 0.088 |
| H29C | 0.5216  | 0.4720  | 0.5634 | 0.088 |
| H20A | 0.2209  | 0.1932  | 0.7151 | 0.084 |
| H20B | 0.3289  | 0.1884  | 0.6671 | 0.084 |
| H20C | 0.1832  | 0.1367  | 0.6549 | 0.084 |

|      | <b>x/a</b> | <b>y/b</b> | <b>z/c</b> | <b>U(eq)</b> |
|------|------------|------------|------------|--------------|
| H3   | -0.1691    | 0.1671     | 0.4971     | 0.07         |
| H18A | 0.1379     | 0.4710     | 0.4904     | 0.094        |
| H18B | 0.2893     | 0.4898     | 0.5130     | 0.094        |
| H18C | 0.1802     | 0.5847     | 0.5215     | 0.094        |
| H28A | 0.9165     | 0.1817     | 0.6514     | 0.114        |
| H28B | 0.8960     | 0.0725     | 0.6133     | 0.114        |
| H28C | 0.8434     | 0.0753     | 0.6764     | 0.114        |
| H30  | 0.4689     | 0.2195     | 0.2581     | 0.087        |
| H19A | -0.0156    | 0.6170     | 0.7078     | 0.141        |
| H19B | -0.0556    | 0.5045     | 0.7390     | 0.141        |
| H19C | -0.1394    | 0.5448     | 0.6833     | 0.141        |
| H31A | 0.6837     | 0.3582     | 0.2934     | 0.309        |
| H31B | 0.5358     | 0.4044     | 0.2800     | 0.309        |
| H31C | 0.6165     | 0.3470     | 0.2307     | 0.309        |
| H32A | 0.6721     | 0.1385     | 0.2435     | 0.313        |
| H32B | 0.6006     | 0.0728     | 0.2928     | 0.313        |
| H32C | 0.7197     | 0.1576     | 0.3086     | 0.313        |

## Crystal data for 5

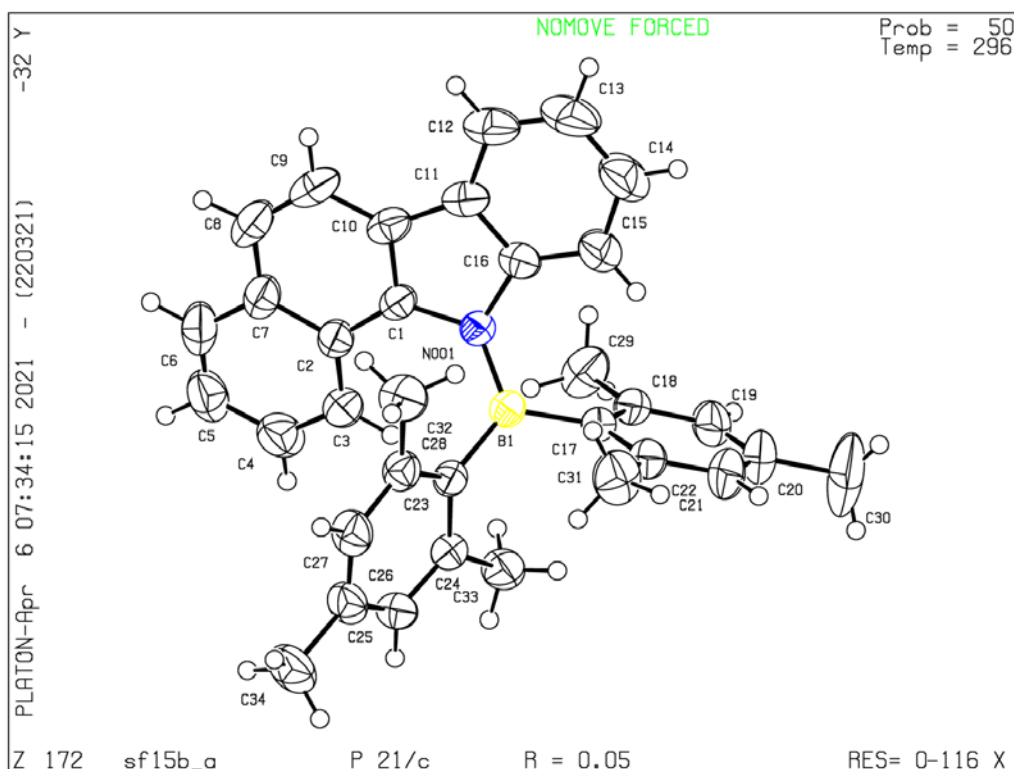

A specimen of  $C_{34}H_{32}BN$ , approximate dimensions 0.350 mm x 0.400 mm x 0.500 mm, was used for the X-ray crystallographic analysis. The X-ray intensity data were measured. The total exposure time was 6.67 hours. The frames were integrated with the Bruker SAINT software package using a narrow-frame algorithm. The integration of the data using a monoclinic unit cell yielded a total of 36617 reflections to a maximum  $\theta$  angle of  $26.00^\circ$  (0.81 Å resolution), of which 5218 were independent (average redundancy 7.017, completeness = 99.0%,  $R_{int} = 2.63\%$ ,  $R_{sig} = 1.49\%$ ) and 4720 (90.46%) were greater than  $2\sigma(F^2)$ . The final cell constants of  $a = 11.5407(6)$  Å,  $b = 8.4893(5)$  Å,  $c = 27.6625(15)$  Å,  $\beta = 98.960(2)^\circ$ , volume =  $2677.1(3)$  Å<sup>3</sup>, are based upon the refinement of the XYZ-centroids of 9963 reflections above  $20\sigma(I)$  with  $5.024^\circ < 2\theta < 61.09^\circ$ . Data were corrected for absorption effects using the Multi-Scan method (SADABS). The ratio of minimum to maximum apparent transmission was 0.940. The calculated minimum and maximum transmission coefficients (based on crystal size) are 0.9680 and 0.9770. The structure was solved and refined using the Bruker SHELXTL Software Package, using the space group  $P 1 21/c 1$ , with  $Z = 4$  for the formula unit,  $C_{34}H_{32}BN$ . The final anisotropic full-matrix least-squares refinement on  $F^2$  with 331 variables converged at  $R1 = 5.09\%$ , for the observed data and  $wR2 = 13.44\%$  for all data. The goodness-of-fit was 1.037. The largest peak in the final difference electron density synthesis was  $0.245 e^-/\text{Å}^3$  and the largest hole was  $-0.178 e^-/\text{Å}^3$  with an RMS deviation of  $0.029 e^-/\text{Å}^3$ . On the basis of the final model, the calculated density was  $1.155 \text{ g/cm}^3$  and  $F(000)$ , 992  $e^-$ . CCDC number: 208357

## Table 1. Sample and crystal data

|                        |                                    |                           |
|------------------------|------------------------------------|---------------------------|
| Identification code    | mazza1906                          |                           |
| Chemical formula       | C <sub>34</sub> H <sub>32</sub> BN |                           |
| Formula weight         | 465.41 g/mol                       |                           |
| Temperature            | 296(2) K                           |                           |
| Wavelength             | 0.71073 Å                          |                           |
| Crystal size           | 0.350 x 0.400 x 0.500 mm           |                           |
| Crystal system         | monoclinic                         |                           |
| Space group            | P 1 21/c 1                         |                           |
| Unit cell dimensions   | a = 11.5407(6) Å                   | $\alpha = 90^\circ$       |
|                        | b = 8.4893(5) Å                    | $\beta = 98.960(2)^\circ$ |
|                        | c = 27.6625(15) Å                  | $\gamma = 90^\circ$       |
| Volume                 | 2677.1(3) Å <sup>3</sup>           |                           |
| Z                      | 4                                  |                           |
| Density (calculated)   | 1.155 g/cm <sup>3</sup>            |                           |
| Absorption coefficient | 0.065 mm <sup>-1</sup>             |                           |
| F(000)                 | 992                                |                           |

## Table 2. Data collection and structure refinement

|                                     |                                             |
|-------------------------------------|---------------------------------------------|
| Theta range for data collection     | 2.51 to 26.00°                              |
| Index ranges                        | -14<=h<=14, -10<=k<=10, -34<=l<=34          |
| Reflections collected               | 36617                                       |
| Independent reflections             | 5218 [R(int) = 0.0263]                      |
| Coverage of independent reflections | 99.0%                                       |
| Absorption correction               | Multi-Scan                                  |
| Max. and min. transmission          | 0.9770 and 0.9680                           |
| Structure solution technique        | direct methods                              |
| Structure solution program          | XT, VERSION 2014/5                          |
| Refinement method                   | Full-matrix least-squares on F <sup>2</sup> |
| Refinement program                  | SHELXL-2014/7 (Sheldrick, 2014)             |

|                                         |                                                                                                                         |                              |
|-----------------------------------------|-------------------------------------------------------------------------------------------------------------------------|------------------------------|
| <b>Function minimized</b>               | $\Sigma w(F_o^2 - F_c^2)^2$                                                                                             |                              |
| <b>Data / restraints / parameters</b>   | 5218 / 0 / 331                                                                                                          |                              |
| <b>Goodness-of-fit on F<sup>2</sup></b> | 1.037                                                                                                                   |                              |
| $\Delta/\sigma_{\max}$                  | 0.001                                                                                                                   |                              |
| <b>Final R indices</b>                  | 4720 data;<br>I>2 $\sigma$ (I)                                                                                          | R1 = 0.0509, wR2 =<br>0.1312 |
|                                         | all data                                                                                                                | R1 = 0.0553, wR2 =<br>0.1344 |
| <b>Weighting scheme</b>                 | w=1/[ $\sigma^2(F_o^2)+(0.0634P)^2+0.7797P$ ]<br>where P=(F <sub>o</sub> <sup>2</sup> +2F <sub>c</sub> <sup>2</sup> )/3 |                              |
| <b>Largest diff. peak and hole</b>      | 0.245 and -0.178 eÅ <sup>-3</sup>                                                                                       |                              |
| <b>R.M.S. deviation from mean</b>       | 0.029 eÅ <sup>-3</sup>                                                                                                  |                              |

### Table 3. Atomic coordinates and equivalent isotropic atomic displacement parameters (Å<sup>2</sup>)

U(eq) is defined as one third of the trace of the orthogonalized U<sub>ij</sub> tensor.

|      | x/a         | y/b         | z/c        | U(eq)     |
|------|-------------|-------------|------------|-----------|
| N001 | 0.29918(10) | 0.74757(13) | 0.65886(4) | 0.0399(3) |
| C17  | 0.15636(12) | 0.54080(16) | 0.61290(5) | 0.0406(3) |
| C23  | 0.29780(11) | 0.72064(16) | 0.56406(5) | 0.0387(3) |
| C1   | 0.40510(12) | 0.83377(15) | 0.67153(5) | 0.0403(3) |
| C18  | 0.18030(13) | 0.40544(17) | 0.64187(5) | 0.0456(3) |
| C2   | 0.51720(12) | 0.80668(17) | 0.65725(5) | 0.0432(3) |
| C24  | 0.33173(12) | 0.60807(17) | 0.53147(5) | 0.0425(3) |
| C16  | 0.22485(13) | 0.79629(17) | 0.69299(5) | 0.0458(3) |
| C11  | 0.27955(15) | 0.91896(17) | 0.72165(5) | 0.0503(4) |
| C25  | 0.37283(13) | 0.6563(2)   | 0.48940(5) | 0.0506(4) |
| C10  | 0.39278(14) | 0.94275(16) | 0.70761(5) | 0.0473(3) |
| C28  | 0.29841(13) | 0.88018(17) | 0.55008(5) | 0.0458(3) |
| C22  | 0.04618(13) | 0.5525(2)   | 0.58269(6) | 0.0508(4) |
| C7   | 0.60903(14) | 0.91157(19) | 0.67726(5) | 0.0524(4) |
| C3   | 0.54678(13) | 0.6788(2)   | 0.62927(5) | 0.0524(4) |



|     | x/a         | y/b         | z/c         | U(eq)      |
|-----|-------------|-------------|-------------|------------|
| C27 | 0.33656(14) | 0.92188(19) | 0.50661(6)  | 0.0552(4)  |
| C19 | 0.09673(16) | 0.2878(2)   | 0.64017(7)  | 0.0606(4)  |
| C26 | 0.37642(14) | 0.8129(2)   | 0.47622(5)  | 0.0543(4)  |
| C33 | 0.32651(16) | 0.43325(18) | 0.54074(6)  | 0.0567(4)  |
| C8  | 0.58822(17) | 0.0346(2)   | 0.70917(6)  | 0.0629(5)  |
| C32 | 0.25329(17) | 0.00982(19) | 0.57938(7)  | 0.0623(4)  |
| C9  | 0.48430(17) | 0.04791(19) | 0.72549(6)  | 0.0609(5)  |
| B1  | 0.25342(13) | 0.67088(17) | 0.61285(6)  | 0.0376(3)  |
| C15 | 0.11466(16) | 0.7433(2)   | 0.69979(7)  | 0.0639(5)  |
| C29 | 0.29603(17) | 0.3785(2)   | 0.67423(7)  | 0.0682(5)  |
| C5  | 0.74741(16) | 0.7638(3)   | 0.63811(7)  | 0.0726(6)  |
| C31 | 0.01198(16) | 0.6956(3)   | 0.55167(8)  | 0.0730(5)  |
| C6  | 0.72316(15) | 0.8856(3)   | 0.66610(7)  | 0.0673(5)  |
| C12 | 0.22521(19) | 0.9881(2)   | 0.75778(6)  | 0.0691(5)  |
| C21 | 0.96555(15) | 0.4316(3)   | 0.58291(7)  | 0.0700(5)  |
| C4  | 0.65874(15) | 0.6584(3)   | 0.61994(6)  | 0.0674(5)  |
| C20 | 0.98935(17) | 0.2986(3)   | 0.61103(8)  | 0.0749(6)  |
| C34 | 0.41929(18) | 0.8623(3)   | 0.42966(7)  | 0.0747(6)  |
| C14 | 0.0633(2)   | 0.8134(3)   | 0.73633(8)  | 0.0832(6)  |
| C13 | 0.1178(2)   | 0.9341(3)   | 0.76504(8)  | 0.0841(6)  |
| C30 | 0.9011(3)   | 0.1662(4)   | 0.61051(14) | 0.1426(13) |

**Table 4. Bond lengths (Å)**

|         |            |          |            |
|---------|------------|----------|------------|
| N001-C1 | 1.4209(17) | N001-C16 | 1.4320(17) |
| N001-B1 | 1.4538(18) | C17-C18  | 1.404(2)   |
| C17-C22 | 1.412(2)   | C17-B1   | 1.5731(19) |
| C23-C28 | 1.4088(19) | C23-C24  | 1.4105(19) |
| C23-B1  | 1.5740(19) | C1-C10   | 1.3844(19) |
| C1-C2   | 1.429(2)   | C18-C19  | 1.384(2)   |
| C18-C29 | 1.505(2)   | C2-C3    | 1.406(2)   |
| C2-C7   | 1.428(2)   | C24-C25  | 1.385(2)   |
| C24-C33 | 1.509(2)   | C16-C15  | 1.389(2)   |
| C16-C11 | 1.398(2)   | C11-C12  | 1.390(2)   |
| C11-C10 | 1.434(2)   | C25-C26  | 1.381(2)   |
| C25-H25 | 0.93       | C10-C9   | 1.412(2)   |

|              |          |              |          |
|--------------|----------|--------------|----------|
| C28-C27      | 1.389(2) | C28-C32      | 1.507(2) |
| C22-C21      | 1.386(2) | C22-C31      | 1.504(3) |
| C7-C8        | 1.412(3) | C7-C6        | 1.416(3) |
| C3-C4        | 1.368(2) | C3-H3        | 0.93     |
| C27-C26      | 1.376(2) | C27-H27      | 0.93     |
| C19-C20      | 1.372(3) | C19-H19      | 0.93     |
| C26-C34      | 1.509(2) | C33-<br>H33A | 0.96     |
| C33-<br>H33B | 0.96     | C33-<br>H33C | 0.96     |
| C8-C9        | 1.350(3) | C8-H8        | 0.93     |
| C32-<br>H32A | 0.96     | C32-<br>H32B | 0.96     |
| C32-<br>H32C | 0.96     | C9-H9        | 0.93     |
| C15-C14      | 1.384(2) | C15-H15      | 0.93     |
| C29-<br>H29A | 0.96     | C29-<br>H29B | 0.96     |
| C29-<br>H29C | 0.96     | C5-C6        | 1.347(3) |
| C5-C4        | 1.393(3) | C5-H5        | 0.93     |
| C31-<br>H31A | 0.96     | C31-<br>H31B | 0.96     |
| C31-<br>H31C | 0.96     | C6-H6        | 0.93     |
| C12-C13      | 1.366(3) | C12-H12      | 0.93     |
| C21-C20      | 1.374(3) | C21-H21      | 0.93     |
| C4-H4        | 0.93     | C20-C30      | 1.516(3) |
| C34-<br>H34A | 0.96     | C34-<br>H34B | 0.96     |
| C34-<br>H34C | 0.96     | C14-C13      | 1.386(3) |
| C14-H14      | 0.93     | C13-H13      | 0.93     |
| C30-<br>H30A | 0.96     | C30-<br>H30B | 0.96     |
| C30-<br>H30C | 0.96     |              |          |

**Table 5. Bond angles (°)**

|               |            |               |            |
|---------------|------------|---------------|------------|
| C1-N001-C16   | 105.63(11) | C1-N001-B1    | 128.88(11) |
| C16-N001-B1   | 122.23(12) | C18-C17-C22   | 118.32(13) |
| C18-C17-B1    | 119.89(12) | C22-C17-B1    | 121.73(13) |
| C28-C23-C24   | 117.52(12) | C28-C23-B1    | 120.64(12) |
| C24-C23-B1    | 121.74(12) | C10-C1-N001   | 109.93(12) |
| C10-C1-C2     | 120.38(13) | N001-C1-C2    | 129.06(12) |
| C19-C18-C17   | 119.81(15) | C19-C18-C29   | 117.37(15) |
| C17-C18-C29   | 122.79(13) | C3-C2-C7      | 117.75(14) |
| C3-C2-C1      | 125.76(13) | C7-C2-C1      | 116.22(14) |
| C25-C24-C23   | 120.13(13) | C25-C24-C33   | 117.50(13) |
| C23-C24-C33   | 122.37(13) | C15-C16-C11   | 120.42(14) |
| C15-C16-N001  | 130.61(14) | C11-C16-N001  | 108.96(13) |
| C12-C11-C16   | 120.51(16) | C12-C11-C10   | 131.86(16) |
| C16-C11-C10   | 107.53(13) | C26-C25-C24   | 122.33(15) |
| C26-C25-H25   | 118.8      | C24-C25-H25   | 118.8      |
| C1-C10-C9     | 121.32(15) | C1-C10-C11    | 107.53(13) |
| C9-C10-C11    | 131.10(15) | C27-C28-C23   | 119.89(14) |
| C27-C28-C32   | 117.53(14) | C23-C28-C32   | 122.51(13) |
| C21-C22-C17   | 119.25(16) | C21-C22-C31   | 118.94(16) |
| C17-C22-C31   | 121.76(14) | C8-C7-C6      | 120.39(15) |
| C8-C7-C2      | 121.02(15) | C6-C7-C2      | 118.53(16) |
| C4-C3-C2      | 121.31(16) | C4-C3-H3      | 119.3      |
| C2-C3-H3      | 119.3      | C26-C27-C28   | 122.59(15) |
| C26-C27-H27   | 118.7      | C28-C27-H27   | 118.7      |
| C20-C19-C18   | 122.17(17) | C20-C19-H19   | 118.9      |
| C18-C19-H19   | 118.9      | C27-C26-C25   | 117.33(14) |
| C27-C26-C34   | 121.34(17) | C25-C26-C34   | 121.31(17) |
| C24-C33-H33A  | 109.5      | C24-C33-H33B  | 109.5      |
| H33A-C33-H33B | 109.5      | C24-C33-H33C  | 109.5      |
| H33A-C33-H33C | 109.5      | H33B-C33-H33C | 109.5      |
| C9-C8-C7      | 121.14(15) | C9-C8-H8      | 119.4      |
| C7-C8-H8      | 119.4      | C28-C32-H32A  | 109.5      |
| C28-C32-H32B  | 109.5      | H32A-C32-H32B | 109.5      |

|                   |            |                   |            |
|-------------------|------------|-------------------|------------|
| C28-C32-<br>H32C  | 109.5      | H32A-C32-<br>H32C | 109.5      |
| H32B-C32-<br>H32C | 109.5      | C8-C9-C10         | 119.00(15) |
| C8-C9-H9          | 120.5      | C10-C9-H9         | 120.5      |
| N001-B1-C17       | 118.37(12) | N001-B1-C23       | 120.54(12) |
| C17-B1-C23        | 121.06(12) | C14-C15-C16       | 117.75(18) |
| C14-C15-H15       | 121.1      | C16-C15-H15       | 121.1      |
| C18-C29-<br>H29A  | 109.5      | C18-C29-<br>H29B  | 109.5      |
| H29A-C29-<br>H29B | 109.5      | C18-C29-<br>H29C  | 109.5      |
| H29A-C29-<br>H29C | 109.5      | H29B-C29-<br>H29C | 109.5      |
| C6-C5-C4          | 119.60(18) | C6-C5-H5          | 120.2      |
| C4-C5-H5          | 120.2      | C22-C31-<br>H31A  | 109.5      |
| C22-C31-<br>H31B  | 109.5      | H31A-C31-<br>H31B | 109.5      |
| C22-C31-<br>H31C  | 109.5      | H31A-C31-<br>H31C | 109.5      |
| H31B-C31-<br>H31C | 109.5      | C5-C6-C7          | 121.90(16) |
| C5-C6-H6          | 119.1      | C7-C6-H6          | 119.1      |
| C13-C12-C11       | 119.05(18) | C13-C12-H12       | 120.5      |
| C11-C12-H12       | 120.5      | C20-C21-C22       | 122.39(17) |
| C20-C21-H21       | 118.8      | C22-C21-H21       | 118.8      |
| C3-C4-C5          | 120.84(19) | C3-C4-H4          | 119.6      |
| C5-C4-H4          | 119.6      | C19-C20-C21       | 118.03(16) |
| C19-C20-C30       | 120.0(2)   | C21-C20-C30       | 121.9(2)   |
| C26-C34-<br>H34A  | 109.5      | C26-C34-<br>H34B  | 109.5      |
| H34A-C34-<br>H34B | 109.5      | C26-C34-<br>H34C  | 109.5      |
| H34A-C34-<br>H34C | 109.5      | H34B-C34-<br>H34C | 109.5      |
| C15-C14-C13       | 121.9(2)   | C15-C14-H14       | 119.1      |
| C13-C14-H14       | 119.1      | C12-C13-C14       | 120.37(17) |
| C12-C13-H13       | 119.8      | C14-C13-H13       | 119.8      |

|                   |       |                   |       |
|-------------------|-------|-------------------|-------|
| C20-C30-<br>H30A  | 109.5 | C20-C30-<br>H30B  | 109.5 |
| H30A-C30-<br>H30B | 109.5 | C20-C30-<br>H30C  | 109.5 |
| H30A-C30-<br>H30C | 109.5 | H30B-C30-<br>H30C | 109.5 |

**Table 6. Torsion angles (°)**

|                     |                 |                      |                 |
|---------------------|-----------------|----------------------|-----------------|
| C16-N001-<br>C1-C10 | -6.50(15)       | B1-N001-C1-<br>C10   | 153.06(13)      |
| C16-N001-<br>C1-C2  | 164.36(13)      | B1-N001-C1-<br>C2    | -36.1(2)        |
| C22-C17-<br>C18-C19 | 0.1(2)          | B1-C17-C18-<br>C19   | -<br>177.07(13) |
| C22-C17-<br>C18-C29 | 178.13(15)      | B1-C17-C18-<br>C29   | 0.9(2)          |
| C10-C1-C2-<br>C3    | 165.74(14)      | N001-C1-C2-<br>C3    | -4.3(2)         |
| C10-C1-C2-<br>C7    | -8.10(19)       | N001-C1-C2-<br>C7    | -<br>178.12(12) |
| C28-C23-<br>C24-C25 | 5.1(2)          | B1-C23-C24-<br>C25   | -<br>178.56(13) |
| C28-C23-<br>C24-C33 | -<br>175.63(14) | B1-C23-C24-<br>C33   | 0.7(2)          |
| C1-N001-<br>C16-C15 | -<br>175.27(17) | B1-N001-<br>C16-C15  | 23.5(2)         |
| C1-N001-<br>C16-C11 | 5.94(15)        | B1-N001-<br>C16-C11  | -<br>155.31(13) |
| C15-C16-<br>C11-C12 | 0.9(2)          | N001-C16-<br>C11-C12 | 179.85(14)      |
| C15-C16-<br>C11-C10 | 177.78(15)      | N001-C16-<br>C11-C10 | -3.28(16)       |
| C23-C24-<br>C25-C26 | -3.6(2)         | C33-C24-<br>C25-C26  | 177.08(15)      |
| N001-C1-<br>C10-C9  | -<br>177.62(13) | C2-C1-C10-<br>C9     | 10.6(2)         |
| N001-C1-<br>C10-C11 | 4.59(15)        | C2-C1-C10-<br>C11    | -<br>167.18(12) |
| C12-C11-<br>C10-C1  | 175.60(17)      | C16-C11-<br>C10-C1   | -0.77(16)       |

|                     |                 |                     |                 |
|---------------------|-----------------|---------------------|-----------------|
| C12-C11-<br>C10-C9  | -1.9(3)         | C16-C11-<br>C10-C9  | -<br>178.26(15) |
| C24-C23-<br>C28-C27 | -2.8(2)         | B1-C23-C28-<br>C27  | -<br>179.23(13) |
| C24-C23-<br>C28-C32 | 174.09(14)      | B1-C23-C28-<br>C32  | -2.3(2)         |
| C18-C17-<br>C22-C21 | 0.5(2)          | B1-C17-C22-<br>C21  | 177.67(15)      |
| C18-C17-<br>C22-C31 | 178.10(15)      | B1-C17-C22-<br>C31  | -4.8(2)         |
| C3-C2-C7-<br>C8     | -<br>174.53(14) | C1-C2-C7-<br>C8     | -0.2(2)         |
| C3-C2-C7-<br>C6     | 2.8(2)          | C1-C2-C7-<br>C6     | 177.16(13)      |
| C7-C2-C3-<br>C4     | -2.3(2)         | C1-C2-C3-<br>C4     | -<br>176.07(15) |
| C23-C28-<br>C27-C26 | -1.1(2)         | C32-C28-<br>C27-C26 | -<br>178.15(15) |
| C17-C18-<br>C19-C20 | -0.4(3)         | C29-C18-<br>C19-C20 | -<br>178.47(18) |
| C28-C27-<br>C26-C25 | 2.7(2)          | C28-C27-<br>C26-C34 | -<br>178.91(15) |
| C24-C25-<br>C26-C27 | -0.3(2)         | C24-C25-<br>C26-C34 | -<br>178.73(15) |
| C6-C7-C8-<br>C9     | -<br>170.85(15) | C2-C7-C8-<br>C9     | 6.4(2)          |
| C7-C8-C9-<br>C10    | -4.2(2)         | C1-C10-C9-<br>C8    | -4.3(2)         |
| C11-C10-C9-<br>C8   | 172.94(16)      | C1-N001-B1-<br>C17  | 161.19(13)      |
| C16-N001-<br>B1-C17 | -42.24(18)      | C1-N001-B1-<br>C23  | -20.5(2)        |
| C16-N001-<br>B1-C23 | 136.11(13)      | C18-C17-B1-<br>N001 | -59.91(17)      |
| C22-C17-B1-<br>N001 | 123.00(15)      | C18-C17-B1-<br>C23  | 121.75(14)      |
| C22-C17-B1-<br>C23  | -55.35(19)      | C28-C23-B1-<br>N001 | -51.06(19)      |
| C24-C23-B1-<br>N001 | 132.69(14)      | C28-C23-B1-<br>C17  | 127.25(14)      |

|                      |            |                     |                 |
|----------------------|------------|---------------------|-----------------|
| C24-C23-B1-<br>C17   | -49.00(19) | C11-C16-<br>C15-C14 | -1.5(3)         |
| N001-C16-<br>C15-C14 | 179.82(17) | C4-C5-C6-<br>C7     | -0.9(3)         |
| C8-C7-C6-<br>C5      | 176.08(16) | C2-C7-C6-<br>C5     | -1.3(2)         |
| C16-C11-<br>C12-C13  | 0.3(3)     | C10-C11-<br>C12-C13 | -<br>175.72(18) |
| C17-C22-<br>C21-C20  | -1.0(3)    | C31-C22-<br>C21-C20 | -<br>178.66(19) |
| C2-C3-C4-<br>C5      | 0.2(3)     | C6-C5-C4-<br>C3     | 1.4(3)          |
| C18-C19-<br>C20-C21  | -0.1(3)    | C18-C19-<br>C20-C30 | 179.9(2)        |
| C22-C21-<br>C20-C19  | 0.8(3)     | C22-C21-<br>C20-C30 | -179.2(2)       |
| C16-C15-<br>C14-C13  | 1.0(3)     | C11-C12-<br>C13-C14 | -0.8(3)         |
| C15-C14-<br>C13-C12  | 0.2(4)     |                     |                 |

### Table 7. Anisotropic atomic displacement parameters ( $\text{\AA}^2$ )

The anisotropic atomic displacement factor exponent takes the form:  
 $-2\pi^2 [ h^2 a^{*2} U_{11} + \dots + 2 h k a^* b^* U_{12} ]$

|      | $U_{11}$   | $U_{22}$  | $U_{33}$  | $U_{23}$   | $U_{13}$   | $U_{12}$   |
|------|------------|-----------|-----------|------------|------------|------------|
| N001 | 0.0456(6)  | 0.0374(6) | 0.0375(6) | -0.0034(5) | 0.0092(5)  | -0.0062(5) |
| C17  | 0.0430(7)  | 0.0433(7) | 0.0367(6) | -0.0047(5) | 0.0095(5)  | -0.0073(6) |
| C23  | 0.0393(7)  | 0.0385(7) | 0.0379(7) | -0.0005(5) | 0.0041(5)  | -0.0058(5) |
| C1   | 0.0510(8)  | 0.0346(6) | 0.0332(6) | 0.0026(5)  | 0.0003(5)  | -0.0073(6) |
| C18  | 0.0544(8)  | 0.0425(7) | 0.0411(7) | -0.0029(6) | 0.0114(6)  | -0.0099(6) |
| C2   | 0.0467(8)  | 0.0466(7) | 0.0345(6) | 0.0084(6)  | 0.0005(5)  | -0.0093(6) |
| C24  | 0.0435(7)  | 0.0436(7) | 0.0400(7) | -0.0028(6) | 0.0053(5)  | -0.0048(6) |
| C16  | 0.0567(8)  | 0.0429(7) | 0.0396(7) | 0.0000(6)  | 0.0129(6)  | 0.0028(6)  |
| C11  | 0.0704(10) | 0.0420(8) | 0.0379(7) | -0.0024(6) | 0.0063(7)  | 0.0054(7)  |
| C25  | 0.0517(8)  | 0.0609(9) | 0.0400(7) | -0.0051(7) | 0.0095(6)  | -0.0033(7) |
| C10  | 0.0644(9)  | 0.0376(7) | 0.0368(7) | 0.0000(6)  | -0.0022(6) | -0.0020(6) |
| C28  | 0.0497(8)  | 0.0407(7) | 0.0463(8) | 0.0041(6)  | 0.0050(6)  | -0.0048(6) |
| C22  | 0.0409(7)  | 0.0631(9) | 0.0489(8) | -0.0044(7) | 0.0080(6)  | -0.0048(7) |

|     | U <sub>11</sub> | U <sub>22</sub> | U <sub>33</sub> | U <sub>23</sub>         | U <sub>13</sub> | U <sub>12</sub>         |
|-----|-----------------|-----------------|-----------------|-------------------------|-----------------|-------------------------|
| C7  | 0.0567(9)       | 0.0549(9)       | 0.0414(7)       | 0.0146(7)               | -0.0054(6)      | -0.0185(7)              |
| C3  | 0.0458(8)       | 0.0645(10)      | 0.0454(8)       | -0.0036(7)              | 0.0029(6)       | -0.0060(7)              |
| C27 | 0.0617(9)       | 0.0498(9)       | 0.0534(9)       | 0.0154(7)               | 0.0070(7)       | -0.0060(7)              |
| C19 | 0.0706(11)      | 0.0503(9)       | 0.0651(10)      | 0.0014(8)               | 0.0237(8)       | -0.0168(8)              |
| C26 | 0.0508(8)       | 0.0710(10)      | 0.0410(8)       | 0.0109(7)               | 0.0065(6)       | -0.0064(7)              |
| C33 | 0.0704(10)      | 0.0424(8)       | 0.0612(9)       | -0.0088(7)              | 0.0227(8)       | -0.0035(7)              |
| C8  | 0.0730(11)      | 0.0527(9)       | 0.0549(9)       | 0.0040(8)               | -0.0153(8)      | -0.0240(8)              |
| C32 | 0.0845(12)      | 0.0374(8)       | 0.0669(10)      | 0.0046(7)               | 0.0174(9)       | 0.0037(8)               |
| C9  | 0.0854(12)      | 0.0430(8)       | 0.0471(8)       | -0.0071(7)              | -0.0124(8)      | -0.0079(8)              |
| B1  | 0.0388(7)       | 0.0329(7)       | 0.0406(8)       | -0.0004(6)              | 0.0049(6)       | 0.0006(6)               |
| C15 | 0.0648(10)      | 0.0667(11)      | 0.0660(10)      | -0.0124(9)              | 0.0278(8)       | -0.0065(8)              |
| C29 | 0.0814(12)      | 0.0513(9)       | 0.0647(10)      | 0.0135(8)               | -0.0113(9)      | -0.0101(9)              |
| C5  | 0.0472(9)       | 0.1076(16)      | 0.0632(11)      | 0.0174(11)              | 0.0092(8)       | <sup>-</sup> 0.0102(10) |
| C31 | 0.0513(10)      | 0.0882(14)      | 0.0758(12)      | 0.0142(10)              | -0.0020(8)      | 0.0050(9)               |
| C6  | 0.0527(9)       | 0.0845(13)      | 0.0609(10)      | 0.0241(10)              | -0.0034(8)      | -0.0270(9)              |
| C12 | 0.0982(14)      | 0.0598(10)      | 0.0514(9)       | -0.0128(8)              | 0.0183(9)       | 0.0107(10)              |
| C21 | 0.0404(8)       | 0.0912(14)      | 0.0775(12)      | <sup>-</sup> 0.0061(11) | 0.0063(8)       | -0.0193(9)              |
| C4  | 0.0531(9)       | 0.0944(14)      | 0.0550(9)       | -0.0021(9)              | 0.0099(7)       | 0.0026(9)               |
| C20 | 0.0579(10)      | 0.0769(13)      | 0.0925(14)      | <sup>-</sup> 0.0049(11) | 0.0202(10)      | <sup>-</sup> 0.0315(10) |
| C34 | 0.0756(12)      | 0.0999(15)      | 0.0510(10)      | 0.0217(10)              | 0.0177(8)       | <sup>-</sup> 0.0061(11) |
| C14 | 0.0831(14)      | 0.0906(15)      | 0.0870(14)      | <sup>-</sup> 0.0135(12) | 0.0477(12)      | 0.0006(12)              |
| C13 | 0.1078(17)      | 0.0854(14)      | 0.0680(12)      | <sup>-</sup> 0.0180(11) | 0.0413(12)      | 0.0162(12)              |
| C30 | 0.099(2)        | 0.127(2)        | 0.198(4)        | 0.021(2)                | 0.011(2)        | <sup>-</sup> 0.0743(19) |

**Table 8. Hydrogen atomic coordinates and isotropic atomic displacement parameters (Å<sup>2</sup>)**

|     | x/a    | y/b    | z/c    | U(eq) |
|-----|--------|--------|--------|-------|
| H25 | 0.3989 | 0.5806 | 0.4693 | 0.061 |



|      | <b>x/a</b> | <b>y/b</b> | <b>z/c</b> | <b>U(eq)</b> |
|------|------------|------------|------------|--------------|
| H3   | 0.4891     | 0.6068     | 0.6168     | 0.063        |
| H27  | 0.3351     | 1.0276     | 0.4977     | 0.066        |
| H19  | 0.1139     | 0.1985     | 0.6594     | 0.073        |
| H33A | 0.2462     | 0.4014     | 0.5391     | 0.085        |
| H33B | 0.3689     | 0.4096     | 0.5726     | 0.085        |
| H33C | 0.3612     | 0.3775     | 0.5164     | 0.085        |
| H8   | 0.6471     | 1.1078     | 0.7191     | 0.075        |
| H32A | 0.3168     | 1.0514     | 0.6024     | 0.093        |
| H32B | 0.1940     | 0.9684     | 0.5967     | 0.093        |
| H32C | 0.2203     | 1.0922     | 0.5577     | 0.093        |
| H9   | 0.4732     | 1.1251     | 0.7482     | 0.073        |
| H15  | 0.0767     | 0.6635     | 0.6804     | 0.077        |
| H29A | 0.2922     | 0.4184     | 0.7064     | 0.102        |
| H29B | 0.3570     | 0.4322     | 0.6608     | 0.102        |
| H29C | 0.3128     | 0.2677     | 0.6761     | 0.102        |
| H5   | 0.8229     | 0.7502     | 0.6310     | 0.087        |
| H31A | -0.0689    | 0.6875     | 0.5371     | 0.11         |
| H31B | 0.0600     | 0.7022     | 0.5264     | 0.11         |
| H31C | 0.0230     | 0.7883     | 0.5717     | 0.11         |
| H6   | 0.7831     | 0.9546     | 0.6784     | 0.081        |
| H12  | 0.2615     | 1.0700     | 0.7767     | 0.083        |
| H21  | -0.1073    | 0.4408     | 0.5633     | 0.084        |
| H4   | 0.6759     | 0.5730     | 0.6012     | 0.081        |
| H34A | 0.3950     | 0.9685     | 0.4217     | 0.112        |
| H34B | 0.3868     | 0.7934     | 0.4035     | 0.112        |
| H34C | 0.5033     | 0.8562     | 0.4342     | 0.112        |
| H14  | -0.0100    | 0.7784     | 0.7418     | 0.1          |
| H13  | 0.0810     | 0.9785     | 0.7894     | 0.101        |
| H30A | -0.0656    | 0.0833     | 0.6319     | 0.214        |
| H30B | -0.1188    | 0.1261     | 0.5778     | 0.214        |
| H30C | -0.1684    | 0.2053     | 0.6215     | 0.214        |

## Crystal data for 6

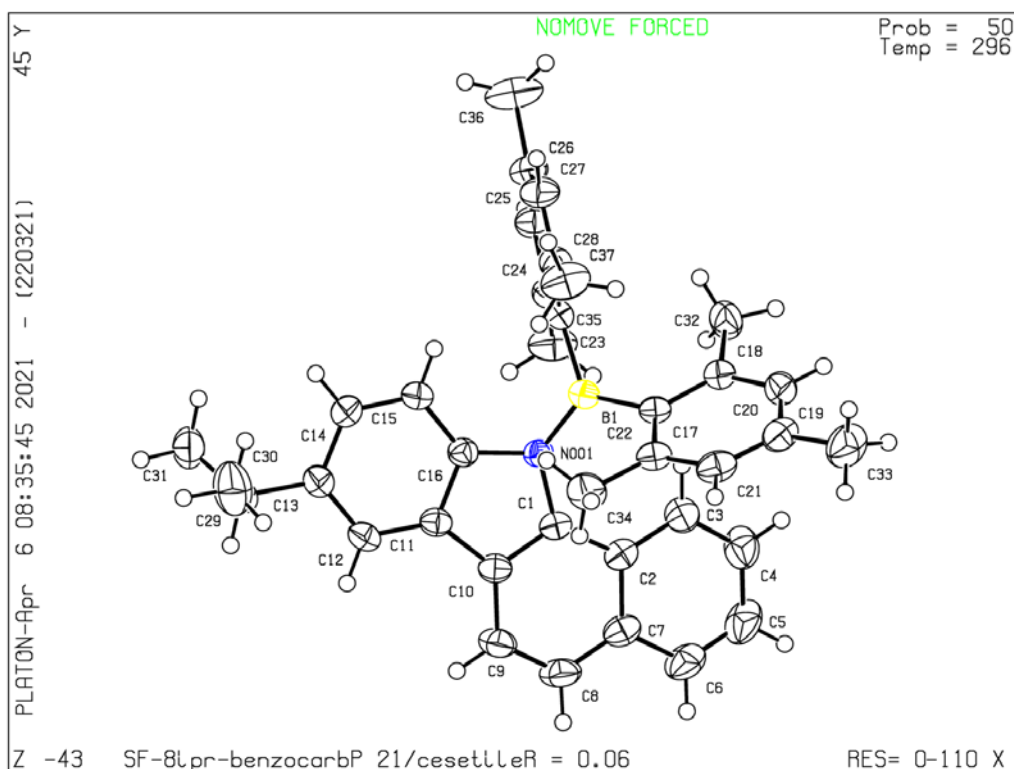

A specimen of  $C_{37}H_{38}BN$ , approximate dimensions 0.300 mm x 0.400 mm x 0.500 mm, was used for the X-ray crystallographic analysis. The X-ray intensity data were measured. The total exposure time was 20.33 hours. The frames were integrated with the Bruker SAINT software package using a narrow-frame algorithm. The integration of the data using a monoclinic unit cell yielded a total of 37031 reflections to a maximum  $\theta$  angle of  $25.00^\circ$  (0.84 Å resolution), of which 5136 were independent (average redundancy 7.210, completeness = 99.7%,  $R_{\text{int}} = 4.28\%$ ,  $R_{\text{sig}} = 2.65\%$ ) and 4716 (91.82%) were greater than  $2\sigma(F^2)$ . The final cell constants of  $a = 15.957(3)$  Å,  $b = 8.378(2)$  Å,  $c = 22.580(5)$  Å,  $\alpha = 90.00(3)^\circ$ ,  $\beta = 104.29(3)^\circ$ ,  $\gamma = 90.00(3)^\circ$ , volume =  $2925.3(12)$  Å<sup>3</sup>, are based upon the refinement of the XYZ-centroids of 9970 reflections above  $20\sigma(I)$  with  $5.049^\circ < 2\theta < 56.54^\circ$ . Data were corrected for absorption effects using the Multi-Scan method (SADABS). The ratio of minimum to maximum apparent transmission was 0.936. The calculated minimum and maximum transmission coefficients (based on crystal size) are 0.9680 and 0.9810. The structure was solved and refined using the Bruker SHELXTL Software Package, using the space group  $P 1 21/c 1$ , with  $Z = 1$  for the formula unit,  $C_{148}H_{152}B_4N_4$ . The final anisotropic full-matrix least-squares refinement on  $F^2$  with 360 variables converged at  $R1 = 6.24\%$ , for the observed data and  $wR2 = 15.29\%$  for all data. The goodness-of-fit was 1.094. The largest peak in the final difference electron density synthesis was  $0.270$  e<sup>-</sup>/Å<sup>3</sup> and the largest hole was  $-0.255$  e<sup>-</sup>/Å<sup>3</sup> with an RMS deviation of  $0.046$  e<sup>-</sup>/Å<sup>3</sup>. On the basis of the final model, the calculated density was  $1.152$  g/cm<sup>3</sup> and  $F(000)$ , 1088 e<sup>-</sup>. CCDC number: 208359

## Table 1. Sample and crystal data

|                        |                                                               |                           |
|------------------------|---------------------------------------------------------------|---------------------------|
| Identification code    | mazza1913                                                     |                           |
| Chemical formula       | C <sub>37</sub> H <sub>38</sub> B <sub>4</sub> N <sub>4</sub> |                           |
| Formula weight         | 2029.97 g/mol                                                 |                           |
| Temperature            | 296(2) K                                                      |                           |
| Wavelength             | 0.71073 Å                                                     |                           |
| Crystal size           | 0.300 x 0.400 x 0.500 mm                                      |                           |
| Crystal system         | monoclinic                                                    |                           |
| Space group            | P 1 21/c 1                                                    |                           |
| Unit cell dimensions   | a = 15.957(3) Å                                               | $\alpha = 90.00(3)^\circ$ |
|                        | b = 8.378(2) Å                                                | $\beta = 104.29(3)^\circ$ |
|                        | c = 22.580(5) Å                                               | $\gamma = 90.00(3)^\circ$ |
| Volume                 | 2925.3(12) Å <sup>3</sup>                                     |                           |
| Z                      | 4                                                             |                           |
| Density (calculated)   | 1.152 g/cm <sup>3</sup>                                       |                           |
| Absorption coefficient | 0.065 mm <sup>-1</sup>                                        |                           |
| F(000)                 | 1088                                                          |                           |

## Table 2. Data collection and structure refinement

|                                     |                                             |
|-------------------------------------|---------------------------------------------|
| Theta range for data collection     | 2.53 to 25.00°                              |
| Index ranges                        | -18<=h<=18, -9<=k<=9, -26<=l<=26            |
| Reflections collected               | 37031                                       |
| Independent reflections             | 5136 [R(int) = 0.0428]                      |
| Coverage of independent reflections | 99.7%                                       |
| Absorption correction               | Multi-Scan                                  |
| Max. and min. transmission          | 0.9810 and 0.9680                           |
| Structure solution technique        | direct methods                              |
| Structure solution program          | XT, VERSION 2014/5                          |
| Refinement method                   | Full-matrix least-squares on F <sup>2</sup> |
| Refinement program                  | SHELXL-2014/7 (Sheldrick, 2014)             |

|                                         |                                                                                                                         |                              |
|-----------------------------------------|-------------------------------------------------------------------------------------------------------------------------|------------------------------|
| <b>Function minimized</b>               | $\Sigma w(F_o^2 - F_c^2)^2$                                                                                             |                              |
| <b>Data / restraints / parameters</b>   | 5136 / 0 / 360                                                                                                          |                              |
| <b>Goodness-of-fit on F<sup>2</sup></b> | 1.094                                                                                                                   |                              |
| $\Delta/\sigma_{\max}$                  | 0.021                                                                                                                   |                              |
| <b>Final R indices</b>                  | 4716 data;<br>I>2 $\sigma$ (I)                                                                                          | R1 = 0.0624, wR2 =<br>0.1498 |
|                                         | all data                                                                                                                | R1 = 0.0667, wR2 =<br>0.1529 |
| <b>Weighting scheme</b>                 | w=1/[ $\sigma^2(F_o^2)+(0.0651P)^2+1.7643P$ ]<br>where P=(F <sub>o</sub> <sup>2</sup> +2F <sub>c</sub> <sup>2</sup> )/3 |                              |
| <b>Largest diff. peak and hole</b>      | 0.270 and -0.255 eÅ <sup>-3</sup>                                                                                       |                              |
| <b>R.M.S. deviation from mean</b>       | 0.046 eÅ <sup>-3</sup>                                                                                                  |                              |

### Table 3. Atomic coordinates and equivalent isotropic atomic displacement parameters (Å<sup>2</sup>)

U(eq) is defined as one third of the trace of the orthogonalized U<sub>ij</sub> tensor.

|      | x/a         | y/b         | z/c        | U(eq)     |
|------|-------------|-------------|------------|-----------|
| N001 | 0.21911(10) | 0.76631(18) | 0.31913(7) | 0.0305(4) |
| C16  | 0.16401(11) | 0.8239(2)   | 0.26380(8) | 0.0316(4) |
| C1   | 0.19210(12) | 0.8466(2)   | 0.36656(8) | 0.0309(4) |
| C17  | 0.38634(12) | 0.7330(2)   | 0.36734(8) | 0.0318(4) |
| C23  | 0.30047(11) | 0.5514(2)   | 0.27096(8) | 0.0306(4) |
| C24  | 0.24541(12) | 0.4186(2)   | 0.26737(9) | 0.0338(4) |
| C11  | 0.11026(11) | 0.9440(2)   | 0.27663(8) | 0.0320(4) |
| C12  | 0.05466(12) | 0.0278(2)   | 0.22993(9) | 0.0366(4) |
| C10  | 0.12792(12) | 0.9559(2)   | 0.34202(9) | 0.0337(4) |
| C28  | 0.35945(12) | 0.5530(2)   | 0.23345(9) | 0.0363(4) |
| C22  | 0.41159(13) | 0.8944(2)   | 0.37488(9) | 0.0358(4) |
| C2   | 0.21552(12) | 0.8148(2)   | 0.43071(9) | 0.0347(4) |
| C25  | 0.25105(13) | 0.2935(2)   | 0.22835(9) | 0.0398(5) |
| C18  | 0.44351(12) | 0.6174(2)   | 0.40008(9) | 0.0360(4) |
| C13  | 0.05231(13) | 0.9938(3)   | 0.16987(9) | 0.0388(5) |

|     | <b>x/a</b>  | <b>y/b</b> | <b>z/c</b>  | <b>U(eq)</b> |
|-----|-------------|------------|-------------|--------------|
| C19 | 0.51939(13) | 0.6642(3)  | 0.44062(9)  | 0.0429(5)    |
| C15 | 0.16143(13) | 0.7862(3)  | 0.20325(9)  | 0.0414(5)    |
| C21 | 0.48969(14) | 0.9347(3)  | 0.41502(10) | 0.0435(5)    |
| C9  | 0.08989(14) | 0.0520(3)  | 0.37953(10) | 0.0442(5)    |
| C27 | 0.36198(14) | 0.4260(3)  | 0.19480(10) | 0.0447(5)    |
| C7  | 0.17553(14) | 0.9144(3)  | 0.46768(9)  | 0.0419(5)    |
| C3  | 0.26864(13) | 0.6900(3)  | 0.45956(9)  | 0.0432(5)    |
| C20 | 0.54393(13) | 0.8231(3)  | 0.44879(9)  | 0.0444(5)    |
| C14 | 0.10564(14) | 0.8708(3)  | 0.15797(9)  | 0.0455(5)    |
| C8  | 0.11525(16) | 0.0334(3)  | 0.44093(10) | 0.0506(6)    |
| C26 | 0.30892(15) | 0.2943(3)  | 0.19190(10) | 0.0447(5)    |
| C34 | 0.35972(15) | 0.0264(3)  | 0.33825(11) | 0.0493(6)    |
| C35 | 0.18165(15) | 0.4017(3)  | 0.30649(11) | 0.0533(6)    |
| C32 | 0.42624(16) | 0.4405(3)  | 0.39261(11) | 0.0520(6)    |
| C29 | 0.99699(14) | 0.0908(3)  | 0.11818(10) | 0.0479(5)    |
| C31 | 0.94268(16) | 0.9887(3)  | 0.06791(10) | 0.0563(6)    |
| C4  | 0.28530(16) | 0.6673(3)  | 0.52121(10) | 0.0565(6)    |
| C5  | 0.24941(17) | 0.7686(4)  | 0.55742(11) | 0.0620(7)    |
| C6  | 0.19584(16) | 0.8876(3)  | 0.53126(10) | 0.0551(6)    |
| B1  | 0.30041(14) | 0.6849(2)  | 0.31983(9)  | 0.0301(4)    |
| C37 | 0.41916(17) | 0.6923(3)  | 0.23251(12) | 0.0586(7)    |
| C33 | 0.62924(16) | 0.8696(4)  | 0.49072(12) | 0.0658(7)    |
| C36 | 0.3143(2)   | 0.1547(3)  | 0.15096(14) | 0.0769(9)    |
| C30 | 0.0531(2)   | 0.2050(4)  | 0.09200(14) | 0.0758(9)    |

**Table 4. Bond lengths (Å)**

|         |          |          |          |
|---------|----------|----------|----------|
| N001-C1 | 1.419(2) | N001-C16 | 1.423(2) |
| N001-B1 | 1.462(3) | C16-C15  | 1.394(3) |
| C16-C11 | 1.398(3) | C1-C10   | 1.383(3) |
| C1-C2   | 1.429(3) | C17-C18  | 1.409(3) |
| C17-C22 | 1.409(3) | C17-B1   | 1.571(3) |
| C23-C28 | 1.413(3) | C23-C24  | 1.408(3) |
| C23-B1  | 1.571(3) | C24-C25  | 1.386(3) |
| C24-C35 | 1.510(3) | C11-C12  | 1.389(3) |
| C11-C10 | 1.437(3) | C12-C13  | 1.377(3) |
| C12-H12 | 0.93     | C10-C9   | 1.410(3) |

|          |          |          |          |
|----------|----------|----------|----------|
| C28-C27  | 1.383(3) | C28-C37  | 1.510(3) |
| C22-C21  | 1.390(3) | C22-C34  | 1.502(3) |
| C2-C3    | 1.401(3) | C2-C7    | 1.437(3) |
| C25-C26  | 1.380(3) | C25-H25  | 0.93     |
| C18-C19  | 1.382(3) | C18-C32  | 1.509(3) |
| C13-C14  | 1.404(3) | C13-C29  | 1.514(3) |
| C19-C20  | 1.387(3) | C19-H19  | 0.93     |
| C15-C14  | 1.375(3) | C15-H15  | 0.93     |
| C21-C20  | 1.371(3) | C21-H21  | 0.93     |
| C9-C8    | 1.354(3) | C9-H9    | 0.93     |
| C27-C26  | 1.383(3) | C27-H27  | 0.93     |
| C7-C6    | 1.410(3) | C7-C8    | 1.413(3) |
| C3-C4    | 1.364(3) | C3-H3    | 0.93     |
| C20-C33  | 1.505(3) | C14-H14  | 0.93     |
| C8-H8    | 0.93     | C26-C36  | 1.506(3) |
| C34-H34A | 0.96     | C34-H34B | 0.96     |
| C34-H34C | 0.96     | C35-H35A | 0.96     |
| C35-H35B | 0.96     | C35-H35C | 0.96     |
| C32-H32A | 0.96     | C32-H32B | 0.96     |
| C32-H32C | 0.96     | C29-C31  | 1.512(3) |
| C29-C30  | 1.526(4) | C29-H29  | 0.98     |
| C31-H31A | 0.96     | C31-H31B | 0.96     |
| C31-H31C | 0.96     | C4-C5    | 1.395(4) |
| C4-H4    | 0.93     | C5-C6    | 1.351(4) |
| C5-H5    | 0.93     | C6-H6    | 0.93     |
| C37-H37A | 0.96     | C37-H37B | 0.96     |
| C37-H37C | 0.96     | C33-H33A | 0.96     |
| C33-H33B | 0.96     | C33-H33C | 0.96     |
| C36-H36A | 0.96     | C36-H36B | 0.96     |
| C36-H36C | 0.96     | C30-H30A | 0.96     |
| C30-H30B | 0.96     | C30-H30C | 0.96     |

**Table 5. Bond angles (°)**

|              |            |              |            |
|--------------|------------|--------------|------------|
| C1-N001-C16  | 105.35(15) | C1-N001-B1   | 130.32(16) |
| C16-N001-B1  | 121.46(15) | C15-C16-C11  | 119.69(18) |
| C15-C16-N001 | 130.28(17) | C11-C16-N001 | 109.88(16) |

|              |            |              |            |
|--------------|------------|--------------|------------|
| C10-C1-N001  | 110.14(16) | C10-C1-C2    | 120.81(17) |
| N001-C1-C2   | 128.63(17) | C18-C17-C22  | 117.88(18) |
| C18-C17-B1   | 121.68(17) | C22-C17-B1   | 120.26(17) |
| C28-C23-C24  | 118.13(17) | C28-C23-B1   | 122.01(17) |
| C24-C23-B1   | 119.64(16) | C25-C24-C23  | 119.79(18) |
| C25-C24-C35  | 117.36(18) | C23-C24-C35  | 122.80(17) |
| C12-C11-C16  | 121.05(17) | C12-C11-C10  | 132.20(17) |
| C16-C11-C10  | 106.74(16) | C13-C12-C11  | 120.01(18) |
| C13-C12-H12  | 120.0      | C11-C12-H12  | 120.0      |
| C1-C10-C9    | 121.55(18) | C1-C10-C11   | 107.69(16) |
| C9-C10-C11   | 130.74(18) | C27-C28-C23  | 119.89(19) |
| C27-C28-C37  | 117.96(19) | C23-C28-C37  | 122.13(18) |
| C21-C22-C17  | 119.71(19) | C21-C22-C34  | 117.64(19) |
| C17-C22-C34  | 122.55(18) | C3-C2-C1     | 125.98(18) |
| C3-C2-C7     | 117.89(18) | C1-C2-C7     | 115.99(18) |
| C26-C25-C24  | 122.22(19) | C26-C25-H25  | 118.9      |
| C24-C25-H25  | 118.9      | C19-C18-C17  | 120.03(19) |
| C19-C18-C32  | 117.30(19) | C17-C18-C32  | 122.67(18) |
| C12-C13-C14  | 118.02(18) | C12-C13-C29  | 121.12(18) |
| C14-C13-C29  | 120.80(18) | C18-C19-C20  | 122.2(2)   |
| C18-C19-H19  | 118.9      | C20-C19-H19  | 118.9      |
| C14-C15-C16  | 118.00(18) | C14-C15-H15  | 121.0      |
| C16-C15-H15  | 121.0      | C20-C21-C22  | 122.6(2)   |
| C20-C21-H21  | 118.7      | C22-C21-H21  | 118.7      |
| C8-C9-C10    | 119.0(2)   | C8-C9-H9     | 120.5      |
| C10-C9-H9    | 120.5      | C28-C27-C26  | 122.08(19) |
| C28-C27-H27  | 119.0      | C26-C27-H27  | 119.0      |
| C6-C7-C8     | 120.6(2)   | C6-C7-C2     | 118.4(2)   |
| C8-C7-C2     | 120.96(19) | C4-C3-C2     | 121.4(2)   |
| C4-C3-H3     | 119.3      | C2-C3-H3     | 119.3      |
| C21-C20-C19  | 117.52(19) | C21-C20-C33  | 121.5(2)   |
| C19-C20-C33  | 120.9(2)   | C15-C14-C13  | 123.21(19) |
| C15-C14-H14  | 118.4      | C13-C14-H14  | 118.4      |
| C9-C8-C7     | 121.3(2)   | C9-C8-H8     | 119.4      |
| C7-C8-H8     | 119.4      | C25-C26-C27  | 117.87(19) |
| C25-C26-C36  | 120.7(2)   | C27-C26-C36  | 121.5(2)   |
| C22-C34-H34A | 109.5      | C22-C34-H34B | 109.5      |

|                   |            |                   |            |
|-------------------|------------|-------------------|------------|
| H34A-C34-<br>H34B | 109.5      | C22-C34-<br>H34C  | 109.5      |
| H34A-C34-<br>H34C | 109.5      | H34B-C34-<br>H34C | 109.5      |
| C24-C35-<br>H35A  | 109.5      | C24-C35-<br>H35B  | 109.5      |
| H35A-C35-<br>H35B | 109.5      | C24-C35-<br>H35C  | 109.5      |
| H35A-C35-<br>H35C | 109.5      | H35B-C35-<br>H35C | 109.5      |
| C18-C32-<br>H32A  | 109.5      | C18-C32-<br>H32B  | 109.5      |
| H32A-C32-<br>H32B | 109.5      | C18-C32-<br>H32C  | 109.5      |
| H32A-C32-<br>H32C | 109.5      | H32B-C32-<br>H32C | 109.5      |
| C13-C29-C31       | 113.09(19) | C13-C29-C30       | 110.44(19) |
| C31-C29-C30       | 110.3(2)   | C13-C29-H29       | 107.6      |
| C31-C29-H29       | 107.6      | C30-C29-H29       | 107.6      |
| C29-C31-<br>H31A  | 109.5      | C29-C31-<br>H31B  | 109.5      |
| H31A-C31-<br>H31B | 109.5      | C29-C31-<br>H31C  | 109.5      |
| H31A-C31-<br>H31C | 109.5      | H31B-C31-<br>H31C | 109.5      |
| C3-C4-C5          | 120.5(2)   | C3-C4-H4          | 119.7      |
| C5-C4-H4          | 119.7      | C6-C5-C4          | 120.0(2)   |
| C6-C5-H5          | 120.0      | C4-C5-H5          | 120.0      |
| C5-C6-C7          | 121.6(2)   | C5-C6-H6          | 119.2      |
| C7-C6-H6          | 119.2      | N001-B1-C17       | 120.68(16) |
| N001-B1-C23       | 118.60(17) | C17-B1-C23        | 120.70(16) |
| C28-C37-<br>H37A  | 109.5      | C28-C37-<br>H37B  | 109.5      |
| H37A-C37-<br>H37B | 109.5      | C28-C37-<br>H37C  | 109.5      |
| H37A-C37-<br>H37C | 109.5      | H37B-C37-<br>H37C | 109.5      |
| C20-C33-<br>H33A  | 109.5      | C20-C33-<br>H33B  | 109.5      |
| H33A-C33-<br>H33B | 109.5      | C20-C33-<br>H33C  | 109.5      |



|                   |       |                   |       |
|-------------------|-------|-------------------|-------|
| H33A-C33-<br>H33C | 109.5 | H33B-C33-<br>H33C | 109.5 |
| C26-C36-<br>H36A  | 109.5 | C26-C36-<br>H36B  | 109.5 |
| H36A-C36-<br>H36B | 109.5 | C26-C36-<br>H36C  | 109.5 |
| H36A-C36-<br>H36C | 109.5 | H36B-C36-<br>H36C | 109.5 |
| C29-C30-<br>H30A  | 109.5 | C29-C30-<br>H30B  | 109.5 |
| H30A-C30-<br>H30B | 109.5 | C29-C30-<br>H30C  | 109.5 |
| H30A-C30-<br>H30C | 109.5 | H30B-C30-<br>H30C | 109.5 |

**Table 6. Torsion angles (°)**

|                     |                 |                      |                 |
|---------------------|-----------------|----------------------|-----------------|
| C1-N001-<br>C16-C15 | 180.0(2)        | B1-N001-<br>C16-C15  | 17.3(3)         |
| C1-N001-<br>C16-C11 | 4.6(2)          | B1-N001-<br>C16-C11  | -<br>158.04(16) |
| C16-N001-<br>C1-C10 | -3.9(2)         | B1-N001-C1-<br>C10   | 156.66(18)      |
| C16-N001-<br>C1-C2  | 168.61(18)      | B1-N001-C1-<br>C2    | -30.8(3)        |
| C28-C23-<br>C24-C25 | 0.8(3)          | B1-C23-C24-<br>C25   | -<br>173.94(18) |
| C28-C23-<br>C24-C35 | 178.23(19)      | B1-C23-C24-<br>C35   | 3.4(3)          |
| C15-C16-<br>C11-C12 | -0.6(3)         | N001-C16-<br>C11-C12 | 175.32(17)      |
| C15-C16-<br>C11-C10 | -<br>179.57(18) | N001-C16-<br>C11-C10 | -3.7(2)         |
| C16-C11-<br>C12-C13 | -0.4(3)         | C10-C11-<br>C12-C13  | 178.2(2)        |
| N001-C1-<br>C10-C9  | -<br>179.88(18) | C2-C1-C10-<br>C9     | 6.9(3)          |
| N001-C1-<br>C10-C11 | 1.7(2)          | C2-C1-C10-<br>C11    | -<br>171.44(16) |
| C12-C11-<br>C10-C1  | -177.6(2)       | C16-C11-<br>C10-C1   | 1.2(2)          |

|                     |                 |                      |                 |
|---------------------|-----------------|----------------------|-----------------|
| C12-C11-<br>C10-C9  | 4.2(4)          | C16-C11-<br>C10-C9   | -177.0(2)       |
| C24-C23-<br>C28-C27 | -0.2(3)         | B1-C23-C28-<br>C27   | 174.47(18)      |
| C24-C23-<br>C28-C37 | 178.0(2)        | B1-C23-C28-<br>C37   | -7.3(3)         |
| C18-C17-<br>C22-C21 | -1.8(3)         | B1-C17-C22-<br>C21   | -<br>177.05(17) |
| C18-C17-<br>C22-C34 | 174.45(18)      | B1-C17-C22-<br>C34   | -0.8(3)         |
| C10-C1-C2-<br>C3    | 168.94(19)      | N001-C1-C2-<br>C3    | -2.9(3)         |
| C10-C1-C2-<br>C7    | -6.5(3)         | N001-C1-C2-<br>C7    | -<br>178.28(18) |
| C23-C24-<br>C25-C26 | -0.5(3)         | C35-C24-<br>C25-C26  | -178.0(2)       |
| C22-C17-<br>C18-C19 | 3.5(3)          | B1-C17-C18-<br>C19   | 178.69(17)      |
| C22-C17-<br>C18-C32 | -<br>175.91(19) | B1-C17-C18-<br>C32   | -0.7(3)         |
| C11-C12-<br>C13-C14 | 1.6(3)          | C11-C12-<br>C13-C29  | -<br>175.70(19) |
| C17-C18-<br>C19-C20 | -2.8(3)         | C32-C18-<br>C19-C20  | 176.7(2)        |
| C11-C16-<br>C15-C14 | 0.4(3)          | N001-C16-<br>C15-C14 | -174.5(2)       |
| C17-C22-<br>C21-C20 | -0.8(3)         | C34-C22-<br>C21-C20  | -<br>177.21(19) |
| C1-C10-C9-<br>C8    | -1.9(3)         | C11-C10-C9-<br>C8    | 176.1(2)        |
| C23-C28-<br>C27-C26 | -0.9(3)         | C37-C28-<br>C27-C26  | -179.1(2)       |
| C3-C2-C7-<br>C6     | 3.8(3)          | C1-C2-C7-C6          | 179.57(19)      |
| C3-C2-C7-<br>C8     | -174.3(2)       | C1-C2-C7-C8          | 1.5(3)          |
| C1-C2-C3-<br>C4     | -178.2(2)       | C7-C2-C3-C4          | -2.9(3)         |
| C22-C21-<br>C20-C19 | 1.6(3)          | C22-C21-<br>C20-C33  | 178.4(2)        |

|                     |            |                     |            |
|---------------------|------------|---------------------|------------|
| C18-C19-<br>C20-C21 | 0.2(3)     | C18-C19-<br>C20-C33 | -176.6(2)  |
| C16-C15-<br>C14-C13 | 0.8(3)     | C12-C13-<br>C14-C15 | -1.8(3)    |
| C29-C13-<br>C14-C15 | 175.5(2)   | C10-C9-C8-<br>C7    | -3.3(4)    |
| C6-C7-C8-<br>C9     | -174.7(2)  | C2-C7-C8-C9         | 3.4(3)     |
| C24-C25-<br>C26-C27 | -0.5(3)    | C24-C25-<br>C26-C36 | 178.8(2)   |
| C28-C27-<br>C26-C25 | 1.2(3)     | C28-C27-<br>C26-C36 | -178.1(2)  |
| C12-C13-<br>C29-C31 | -131.8(2)  | C14-C13-<br>C29-C31 | 51.0(3)    |
| C12-C13-<br>C29-C30 | 104.1(3)   | C14-C13-<br>C29-C30 | -73.1(3)   |
| C2-C3-C4-<br>C5     | 0.1(4)     | C3-C4-C5-C6         | 1.8(4)     |
| C4-C5-C6-<br>C7     | -0.8(4)    | C8-C7-C6-C5         | 176.1(2)   |
| C2-C7-C6-<br>C5     | -2.0(4)    | C1-N001-B1-<br>C17  | -25.7(3)   |
| C16-N001-<br>B1-C17 | 132.17(18) | C1-N001-B1-<br>C23  | 155.85(18) |
| C16-N001-<br>B1-C23 | -46.3(2)   | C18-C17-B1-<br>N001 | 134.87(19) |
| C22-C17-<br>B1-N001 | -50.1(3)   | C18-C17-B1-<br>C23  | -46.7(3)   |
| C22-C17-<br>B1-C23  | 128.35(19) | C28-C23-B1-<br>N001 | 127.75(19) |
| C24-C23-<br>B1-N001 | -57.7(2)   | C28-C23-B1-<br>C17  | -50.7(3)   |
| C24-C23-<br>B1-C17  | 123.89(19) |                     |            |

### Table 7. Anisotropic atomic displacement parameters ( $\text{\AA}^2$ )

The anisotropic atomic displacement factor exponent takes the form:  
 $-2\pi^2 [ h^2 a^{*2} U_{11} + \dots + 2 h k a^* b^* U_{12} ]$

|      | U <sub>11</sub> | U <sub>22</sub> | U <sub>33</sub> | U <sub>23</sub>         | U <sub>13</sub>         | U <sub>12</sub>         |
|------|-----------------|-----------------|-----------------|-------------------------|-------------------------|-------------------------|
| N001 | 0.0310(8)       | 0.0322(8)       | 0.0294(8)       | -0.0031(6)              | 0.0092(6)               | 0.0010(6)               |
| C16  | 0.0295(9)       | 0.0331(10)      | 0.0332(9)       | -0.0013(8)              | 0.0093(7)               | 0.0001(8)               |
| C1   | 0.0325(9)       | 0.0299(9)       | 0.0326(9)       | -0.0038(8)              | 0.0124(8)               | -0.0043(8)              |
| C17  | 0.0330(9)       | 0.0324(10)      | 0.0325(9)       | -0.0030(8)              | 0.0130(8)               | 0.0006(8)               |
| C23  | 0.0288(9)       | 0.0307(9)       | 0.0314(9)       | 0.0009(7)               | 0.0059(7)               | 0.0032(7)               |
| C24  | 0.0317(9)       | 0.0337(10)      | 0.0362(10)      | -0.0017(8)              | 0.0088(8)               | 0.0008(8)               |
| C11  | 0.0302(9)       | 0.0313(10)      | 0.0365(10)      | -0.0026(8)              | 0.0123(8)               | -0.0013(8)              |
| C12  | 0.0316(10)      | 0.0355(10)      | 0.0438(11)      | -0.0008(9)              | 0.0114(8)               | 0.0060(8)               |
| C10  | 0.0347(10)      | 0.0320(10)      | 0.0375(10)      | -0.0016(8)              | 0.0148(8)               | -0.0013(8)              |
| C28  | 0.0359(10)      | 0.0387(11)      | 0.0364(10)      | 0.0005(8)               | 0.0128(8)               | 0.0009(8)               |
| C22  | 0.0390(10)      | 0.0338(10)      | 0.0380(10)      | -0.0048(8)              | 0.0161(8)               | -0.0031(8)              |
| C2   | 0.0338(10)      | 0.0381(11)      | 0.0344(10)      | -0.0033(8)              | 0.0128(8)               | -0.0079(8)              |
| C25  | 0.0433(11)      | 0.0326(10)      | 0.0438(11)      | -0.0052(9)              | 0.0112(9)               | -0.0038(9)              |
| C18  | 0.0367(10)      | 0.0375(11)      | 0.0343(10)      | -0.0028(8)              | 0.0096(8)               | 0.0024(8)               |
| C13  | 0.0345(10)      | 0.0423(11)      | 0.0389(11)      | 0.0009(9)               | 0.0078(8)               | 0.0055(9)               |
| C19  | 0.0351(10)      | 0.0529(13)      | 0.0400(11)      | <sup>-</sup> 0.0016(10) | 0.0079(9)               | 0.0058(9)               |
| C15  | 0.0441(11)      | 0.0456(12)      | 0.0350(10)      | -0.0036(9)              | 0.0105(9)               | 0.0146(9)               |
| C21  | 0.0448(12)      | 0.0413(12)      | 0.0479(12)      | -0.0119(9)              | 0.0185(10)              | <sup>-</sup> 0.0125(10) |
| C9   | 0.0481(12)      | 0.0405(12)      | 0.0488(12)      | -0.0014(9)              | 0.0211(10)              | 0.0102(10)              |
| C27  | 0.0483(12)      | 0.0495(13)      | 0.0435(12)      | <sup>-</sup> 0.0040(10) | 0.0250(10)              | 0.0018(10)              |
| C7   | 0.0460(11)      | 0.0460(12)      | 0.0382(11)      | -0.0053(9)              | 0.0191(9)               | <sup>-</sup> 0.0061(10) |
| C3   | 0.0422(11)      | 0.0518(13)      | 0.0397(11)      | 0.0073(10)              | 0.0178(9)               | 0.0037(10)              |
| C20  | 0.0337(10)      | 0.0607(14)      | 0.0401(11)      | <sup>-</sup> 0.0112(10) | 0.0118(9)               | <sup>-</sup> 0.0069(10) |
| C14  | 0.0482(12)      | 0.0564(14)      | 0.0310(10)      | -0.0024(9)              | 0.0083(9)               | 0.0124(10)              |
| C8   | 0.0638(14)      | 0.0486(13)      | 0.0465(12)      | <sup>-</sup> 0.0088(10) | 0.0271(11)              | 0.0075(11)              |
| C26  | 0.0551(13)      | 0.0397(12)      | 0.0419(11)      | -0.0083(9)              | 0.0172(10)              | 0.0013(10)              |
| C34  | 0.0559(13)      | 0.0319(11)      | 0.0591(14)      | 0.0008(10)              | 0.0125(11)              | <sup>-</sup> 0.0054(10) |
| C35  | 0.0528(13)      | 0.0472(13)      | 0.0709(16)      | <sup>-</sup> 0.0139(12) | 0.0365(12)              | <sup>-</sup> 0.0150(11) |
| C32  | 0.0569(14)      | 0.0378(12)      | 0.0531(13)      | 0.0026(10)              | <sup>-</sup> 0.0020(11) | 0.0076(10)              |

|     | U <sub>11</sub> | U <sub>22</sub> | U <sub>33</sub> | U <sub>23</sub>         | U <sub>13</sub> | U <sub>12</sub>         |
|-----|-----------------|-----------------|-----------------|-------------------------|-----------------|-------------------------|
| C29 | 0.0461(12)      | 0.0535(13)      | 0.0432(12)      | 0.0057(10)              | 0.0091(10)      | 0.0167(10)              |
| C31 | 0.0499(13)      | 0.0716(16)      | 0.0431(12)      | 0.0082(12)              | 0.0032(10)      | 0.0100(12)              |
| C4  | 0.0521(13)      | 0.0758(17)      | 0.0441(12)      | 0.0181(12)              | 0.0168(11)      | 0.0092(12)              |
| C5  | 0.0627(15)      | 0.094(2)        | 0.0330(11)      | 0.0082(12)              | 0.0179(11)      | <sup>-</sup> 0.0007(15) |
| C6  | 0.0607(14)      | 0.0714(16)      | 0.0392(12)      | <sup>-</sup> 0.0067(11) | 0.0235(11)      | <sup>-</sup> 0.0027(13) |
| B1  | 0.0340(11)      | 0.0261(10)      | 0.0328(10)      | 0.0035(8)               | 0.0130(9)       | -0.0002(8)              |
| C37 | 0.0653(15)      | 0.0586(15)      | 0.0637(15)      | <sup>-</sup> 0.0094(12) | 0.0382(13)      | <sup>-</sup> 0.0191(12) |
| C33 | 0.0448(13)      | 0.086(2)        | 0.0616(16)      | <sup>-</sup> 0.0186(14) | 0.0039(12)      | <sup>-</sup> 0.0144(13) |
| C36 | 0.102(2)        | 0.0606(17)      | 0.0821(19)      | <sup>-</sup> 0.0319(15) | 0.0504(18)      | <sup>-</sup> 0.0119(16) |
| C30 | 0.0756(19)      | 0.0666(18)      | 0.0763(19)      | 0.0270(15)              | 0.0018(15)      | <sup>-</sup> 0.0014(15) |

**Table 8. Hydrogen atomic coordinates and isotropic atomic displacement parameters (Å<sup>2</sup>)**

|      | x/a    | y/b    | z/c    | U(eq) |
|------|--------|--------|--------|-------|
| H12  | 0.0190 | 1.1068 | 0.2392 | 0.044 |
| H25  | 0.2146 | 0.2061 | 0.2267 | 0.048 |
| H19  | 0.5552 | 0.5866 | 0.4632 | 0.052 |
| H15  | 0.1964 | 0.7062 | 0.1938 | 0.05  |
| H21  | 0.5058 | 1.0416 | 0.4191 | 0.052 |
| H9   | 0.0480 | 1.1271 | 0.3624 | 0.053 |
| H27  | 0.4006 | 0.4293 | 0.1700 | 0.054 |
| H3   | 0.2931 | 0.6211 | 0.4362 | 0.052 |
| H14  | 0.1031 | 0.8453 | 0.1175 | 0.055 |
| H8   | 0.0926 | 1.1001 | 0.4660 | 0.061 |
| H34A | 0.3163 | 1.0619 | 0.3581 | 0.074 |
| H34B | 0.3324 | 0.9880 | 0.2981 | 0.074 |
| H34C | 0.3973 | 1.1139 | 0.3352 | 0.074 |
| H35A | 0.1310 | 0.4639 | 0.2893 | 0.08  |
| H35B | 0.2077 | 0.4388 | 0.3471 | 0.08  |

|      | <b>x/a</b> | <b>y/b</b> | <b>z/c</b> | <b>U(eq)</b> |
|------|------------|------------|------------|--------------|
| H35C | 0.1658     | 0.2915     | 0.3080     | 0.08         |
| H32A | 0.4313     | 0.4073     | 0.3529     | 0.078        |
| H32B | 0.3689     | 0.4181     | 0.3966     | 0.078        |
| H32C | 0.4675     | 0.3835     | 0.4235     | 0.078        |
| H29  | -0.0426    | 1.1553     | 0.1353     | 0.058        |
| H31A | -0.0202    | 0.9230     | 0.0506     | 0.085        |
| H31B | -0.0914    | 1.0561     | 0.0367     | 0.085        |
| H31C | -0.0949    | 0.9220     | 0.0845     | 0.085        |
| H4   | 0.3209     | 0.5837     | 0.5392     | 0.068        |
| H5   | 0.2624     | 0.7541     | 0.5995     | 0.074        |
| H6   | 0.1718     | 0.9535     | 0.5558     | 0.066        |
| H37A | 0.4424     | 0.6846     | 0.1972     | 0.088        |
| H37B | 0.4656     | 0.6906     | 0.2688     | 0.088        |
| H37C | 0.3875     | 0.7903     | 0.2309     | 0.088        |
| H33A | 0.6735     | 0.8663     | 0.4687     | 0.099        |
| H33B | 0.6434     | 0.7965     | 0.5245     | 0.099        |
| H33C | 0.6252     | 0.9757     | 0.5058     | 0.099        |
| H36A | 0.2863     | 0.0639     | 0.1635     | 0.115        |
| H36B | 0.3739     | 0.1298     | 0.1538     | 0.115        |
| H36C | 0.2861     | 0.1815     | 0.1095     | 0.115        |
| H30A | 0.0829     | 1.2762     | 0.1235     | 0.114        |
| H30B | 0.0171     | 1.2657     | 0.0594     | 0.114        |
| H30C | 0.0944     | 1.1451     | 0.0766     | 0.114        |

## Crystal data for 7

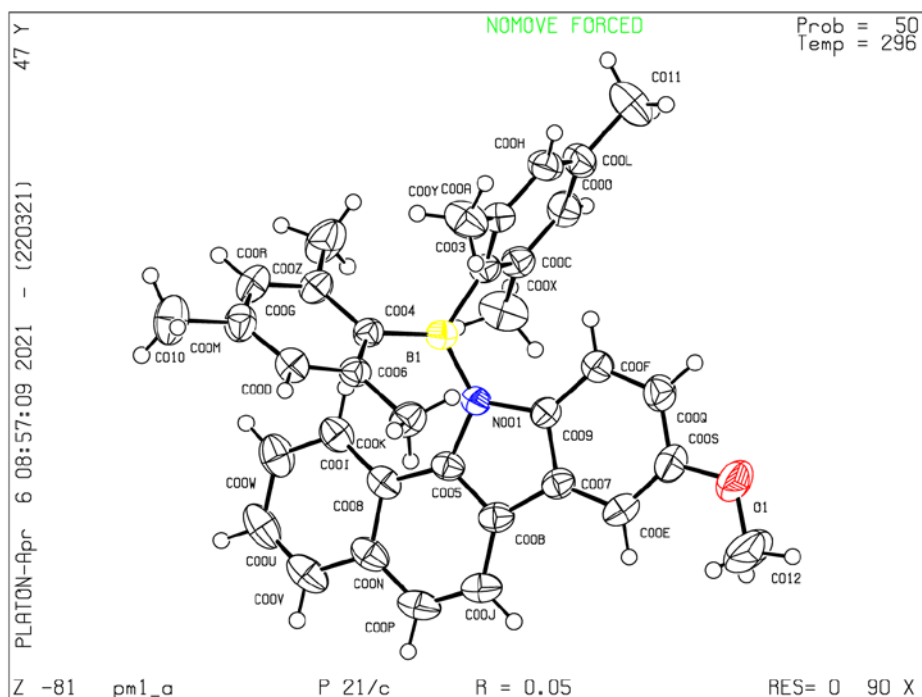

A specimen of  $C_{35}H_{34}BNO$ , approximate dimensions 0.350 mm x 0.350 mm x 0.450 mm, was used for the X-ray crystallographic analysis. The X-ray intensity data were measured. The total exposure time was 13.56 hours. The frames were integrated with the Bruker SAINT software package using a narrow-frame algorithm. The integration of the data using a monoclinic unit cell yielded a total of 39480 reflections to a maximum  $\theta$  angle of  $26.00^\circ$  (0.81 Å resolution), of which 5507 were independent (average redundancy 7.169, completeness = 99.0%,  $R_{int} = 2.45\%$ ,  $R_{sig} = 1.31\%$ ) and 5051 (91.72%) were greater than  $2\sigma(F^2)$ . The final cell constants of  $a = 13.0781(10)$  Å,  $b = 8.4879(6)$  Å,  $c = 25.5536(19)$  Å,  $\beta = 93.325(2)^\circ$ , volume =  $2831.8(4)$  Å<sup>3</sup>, are based upon the refinement of the XYZ-centroids of 9935 reflections above  $20\sigma(I)$  with  $5.057^\circ < 2\theta < 56.70^\circ$ . Data were corrected for absorption effects using the Multi-Scan method (SADABS). The ratio of minimum to maximum apparent transmission was 0.938. The calculated minimum and maximum transmission coefficients (based on crystal size) are 0.9700 and 0.9770. The structure was solved and refined using the Bruker SHELXTL Software Package, using the space group  $P 1 21/c 1$ , with  $Z = 4$  for the formula unit,  $C_{35}H_{34}BNO$ . The final anisotropic full-matrix least-squares refinement on  $F^2$  with 350 variables converged at  $R1 = 4.89\%$ , for the observed data and  $wR2 = 13.39\%$  for all data. The goodness-of-fit was 1.030. The largest peak in the final difference electron density synthesis was  $0.214 e/\text{Å}^3$  and the largest hole was  $-0.180 e/\text{Å}^3$  with an RMS deviation of  $0.034 e/\text{Å}^3$ . On the basis of the final model, the calculated density was  $1.162 \text{ g/cm}^3$  and  $F(000)$ , 1056  $e^-$ . CCDC number: 208358.

## Table 1. Sample and crystal data

|                        |                                                                                                                             |
|------------------------|-----------------------------------------------------------------------------------------------------------------------------|
| Identification code    | mazza2002                                                                                                                   |
| Chemical formula       | C <sub>35</sub> H <sub>34</sub> BNO                                                                                         |
| Formula weight         | 495.44 g/mol                                                                                                                |
| Temperature            | 296(2) K                                                                                                                    |
| Wavelength             | 0.71073 Å                                                                                                                   |
| Crystal size           | 0.350 x 0.350 x 0.450 mm                                                                                                    |
| Crystal system         | monoclinic                                                                                                                  |
| Space group            | P 1 21/c 1                                                                                                                  |
| Unit cell dimensions   | a = 13.0781(10) Å $\alpha = 90^\circ$<br>b = 8.4879(6) Å $\beta = 93.325(2)^\circ$<br>c = 25.5536(19) Å $\gamma = 90^\circ$ |
| Volume                 | 2831.8(4) Å <sup>3</sup>                                                                                                    |
| Z                      | 4                                                                                                                           |
| Density (calculated)   | 1.162 g/cm <sup>3</sup>                                                                                                     |
| Absorption coefficient | 0.068 mm <sup>-1</sup>                                                                                                      |
| F(000)                 | 1056                                                                                                                        |

## Table 2. Data collection and structure refinement

|                                     |                                             |
|-------------------------------------|---------------------------------------------|
| Theta range for data collection     | 1.60 to 26.00°                              |
| Index ranges                        | -16 ≤ h ≤ 16, -10 ≤ k ≤ 10, -31 ≤ l ≤ 31    |
| Reflections collected               | 39480                                       |
| Independent reflections             | 5507 [R(int) = 0.0245]                      |
| Coverage of independent reflections | 99.0%                                       |
| Absorption correction               | Multi-Scan                                  |
| Max. and min. transmission          | 0.9770 and 0.9700                           |
| Structure solution technique        | direct methods                              |
| Structure solution program          | XT, VERSION 2014/5                          |
| Refinement method                   | Full-matrix least-squares on F <sup>2</sup> |
| Refinement program                  | SHELXL-2014/7 (Sheldrick, 2014)             |



|                                         |                                                                                                                         |                              |
|-----------------------------------------|-------------------------------------------------------------------------------------------------------------------------|------------------------------|
| <b>Function minimized</b>               | $\Sigma w(F_o^2 - F_c^2)^2$                                                                                             |                              |
| <b>Data / restraints / parameters</b>   | 5507 / 0 / 350                                                                                                          |                              |
| <b>Goodness-of-fit on F<sup>2</sup></b> | 1.030                                                                                                                   |                              |
| $\Delta/\sigma_{\max}$                  | 0.001                                                                                                                   |                              |
| <b>Final R indices</b>                  | 5051 data;<br>I>2 $\sigma$ (I)                                                                                          | R1 = 0.0489, wR2 =<br>0.1306 |
|                                         | all data                                                                                                                | R1 = 0.0522, wR2 =<br>0.1339 |
| <b>Weighting scheme</b>                 | w=1/[ $\sigma^2(F_o^2)+(0.0678P)^2+0.9105P$ ]<br>where P=(F <sub>o</sub> <sup>2</sup> +2F <sub>c</sub> <sup>2</sup> )/3 |                              |
| <b>Largest diff. peak and hole</b>      | 0.214 and -0.180 eÅ <sup>-3</sup>                                                                                       |                              |
| <b>R.M.S. deviation from mean</b>       | 0.034 eÅ <sup>-3</sup>                                                                                                  |                              |

### Table 3. Atomic coordinates and equivalent isotropic atomic displacement parameters (Å<sup>2</sup>)

U(eq) is defined as one third of the trace of the orthogonalized U<sub>ij</sub> tensor.

|      | <b>x/a</b>  | <b>y/b</b>  | <b>z/c</b> | <b>U(eq)</b> |
|------|-------------|-------------|------------|--------------|
| N001 | 0.67643(8)  | 0.25163(13) | 0.35235(4) | 0.0345(2)    |
| O1   | 0.71456(11) | 0.03754(19) | 0.14897(5) | 0.0759(4)    |
| C003 | 0.80821(10) | 0.47518(15) | 0.36076(5) | 0.0356(3)    |
| C004 | 0.79069(10) | 0.25938(15) | 0.44099(5) | 0.0355(3)    |
| C005 | 0.59152(9)  | 0.16083(15) | 0.36572(5) | 0.0357(3)    |
| C006 | 0.81409(10) | 0.09747(15) | 0.44634(5) | 0.0363(3)    |
| C007 | 0.62290(10) | 0.09947(16) | 0.28098(5) | 0.0383(3)    |
| C008 | 0.53518(10) | 0.16846(16) | 0.41188(5) | 0.0388(3)    |
| C009 | 0.69104(10) | 0.21738(16) | 0.29847(5) | 0.0362(3)    |
| C00A | 0.91536(10) | 0.48313(16) | 0.35666(5) | 0.0394(3)    |
| C00B | 0.55835(10) | 0.06651(16) | 0.32341(6) | 0.0398(3)    |
| C00C | 0.74756(11) | 0.59556(16) | 0.33698(5) | 0.0407(3)    |
| C00D | 0.85282(11) | 0.03902(17) | 0.49423(6) | 0.0431(3)    |
| C00E | 0.62687(11) | 0.03443(18) | 0.23068(6) | 0.0468(3)    |
| C00F | 0.76317(11) | 0.27496(18) | 0.26489(5) | 0.0437(3)    |

|      | <b>x/a</b>  | <b>y/b</b>  | <b>z/c</b>  | <b>U(eq)</b> |
|------|-------------|-------------|-------------|--------------|
| C00G | 0.80933(11) | 0.35629(17) | 0.48564(6)  | 0.0449(3)    |
| C00H | 0.95695(11) | 0.60223(18) | 0.32744(6)  | 0.0456(3)    |
| C00I | 0.55222(11) | 0.27715(18) | 0.45318(6)  | 0.0446(3)    |
| C00J | 0.47385(11) | 0.96428(19) | 0.32648(7)  | 0.0499(4)    |
| C00K | 0.80309(12) | 0.98332(17) | 0.40126(6)  | 0.0466(3)    |
| C00L | 0.89728(13) | 0.71706(18) | 0.30256(6)  | 0.0484(4)    |
| C00M | 0.86713(11) | 0.1326(2)   | 0.53819(6)  | 0.0479(4)    |
| C00N | 0.45065(10) | 0.06239(18) | 0.41413(6)  | 0.0464(3)    |
| C00O | 0.79263(12) | 0.71251(17) | 0.30842(6)  | 0.0464(3)    |
| C00P | 0.42377(11) | 0.96047(19) | 0.37129(7)  | 0.0541(4)    |
| C00Q | 0.76488(12) | 0.2118(2)   | 0.21540(6)  | 0.0480(4)    |
| C00R | 0.84496(12) | 0.2908(2)   | 0.53302(6)  | 0.0514(4)    |
| C00S | 0.69917(12) | 0.0912(2)   | 0.19864(6)  | 0.0491(4)    |
| B1   | 0.75576(11) | 0.32901(17) | 0.38589(6)  | 0.0344(3)    |
| C00U | 0.41224(13) | 0.1681(2)   | 0.49827(7)  | 0.0592(5)    |
| C00V | 0.39227(12) | 0.0651(2)   | 0.45881(7)  | 0.0565(4)    |
| C00W | 0.49234(14) | 0.2773(2)   | 0.49548(7)  | 0.0547(4)    |
| C00X | 0.63295(13) | 0.6044(2)   | 0.34201(9)  | 0.0652(5)    |
| C00Y | 0.98713(12) | 0.3606(2)   | 0.38061(8)  | 0.0598(4)    |
| C00Z | 0.78992(18) | 0.5312(2)   | 0.48394(7)  | 0.0695(5)    |
| C010 | 0.90409(17) | 0.0630(3)   | 0.59030(7)  | 0.0727(5)    |
| C011 | 0.94383(17) | 0.8444(3)   | 0.27056(9)  | 0.0772(6)    |
| C012 | 0.6546(3)   | 0.9100(4)   | 0.13088(10) | 0.1276(13)   |

**Table 4. Bond lengths (Å)**

|               |            |               |            |
|---------------|------------|---------------|------------|
| N001-<br>C005 | 1.4100(16) | N001-<br>C009 | 1.4307(16) |
| N001-B1       | 1.4627(18) | O1-C00S       | 1.3743(18) |
| O1-C012       | 1.400(3)   | C003-<br>C00C | 1.4094(19) |
| C003-<br>C00A | 1.4129(18) | C003-B1       | 1.5727(19) |
| C004-<br>C006 | 1.4129(19) | C004-<br>C00G | 1.4161(19) |
| C004-B1       | 1.570(2)   | C005-<br>C00B | 1.3942(19) |

|               |            |               |            |
|---------------|------------|---------------|------------|
| C005-<br>C008 | 1.4281(19) | C006-<br>C00D | 1.3887(19) |
| C006-<br>C00K | 1.5057(19) | C007-<br>C009 | 1.3961(19) |
| C007-<br>C00E | 1.403(2)   | C007-<br>C00B | 1.440(2)   |
| C008-<br>C00I | 1.410(2)   | C008-<br>C00N | 1.4294(19) |
| C009-<br>C00F | 1.3996(19) | C00A-<br>C00H | 1.387(2)   |
| C00A-<br>C00Y | 1.507(2)   | C00B-<br>C00J | 1.4108(19) |
| C00C-<br>C00O | 1.384(2)   | C00C-<br>C00X | 1.514(2)   |
| C00D-<br>C00M | 1.380(2)   | C00D-<br>H00D | 0.93       |
| C00E-<br>C00S | 1.373(2)   | C00E-<br>H00E | 0.93       |
| C00F-<br>C00Q | 1.375(2)   | C00F-<br>H00F | 0.93       |
| C00G-<br>C00R | 1.388(2)   | C00G-<br>C00Z | 1.507(2)   |
| C00H-<br>C00L | 1.380(2)   | C00H-<br>H00H | 0.93       |
| C00I-<br>C00W | 1.371(2)   | C00I-<br>H00I | 0.93       |
| C00J-<br>C00P | 1.352(2)   | C00J-<br>H00J | 0.93       |
| C00K-<br>H00A | 0.96       | C00K-<br>H00B | 0.96       |
| C00K-<br>H00C | 0.96       | C00L-<br>C00O | 1.386(2)   |
| C00L-<br>C011 | 1.505(2)   | C00M-<br>C00R | 1.378(2)   |
| C00M-<br>C010 | 1.510(2)   | C00N-<br>C00V | 1.410(2)   |
| C00N-<br>C00P | 1.423(2)   | C00O-<br>H00O | 0.93       |
| C00P-<br>H00P | 0.93       | C00Q-<br>C00S | 1.388(2)   |

|                |          |               |          |
|----------------|----------|---------------|----------|
| C00Q-<br>H00Q  | 0.93     | C00R-<br>H00R | 0.93     |
| C00U-<br>C00V  | 1.349(3) | C00U-<br>C00W | 1.403(3) |
| C00U-<br>H00U  | 0.93     | C00V-<br>H00V | 0.93     |
| C00W-<br>H00W  | 0.93     | C00X-<br>H00G | 0.96     |
| C00X-<br>H00K  | 0.96     | C00X-<br>H00L | 0.96     |
| C00Y-<br>H00M  | 0.96     | C00Y-<br>H00N | 0.96     |
| C00Y-<br>H00S  | 0.96     | C00Z-<br>H00T | 0.96     |
| C00Z-<br>H00\$ | 0.96     | C00Z-<br>H00  | 0.96     |
| C010-<br>H01A  | 0.96     | C010-<br>H01B | 0.96     |
| C010-<br>H01C  | 0.96     | C011-<br>H01D | 0.96     |
| C011-<br>H01E  | 0.96     | C011-<br>H01F | 0.96     |
| C012-<br>H01G  | 0.96     | C012-<br>H01H | 0.96     |
| C012-<br>H01I  | 0.96     |               |          |

**Table 5. Bond angles (°)**

|                    |            |                    |            |
|--------------------|------------|--------------------|------------|
| C005-N001-<br>C009 | 105.86(10) | C005-N001-<br>B1   | 130.18(11) |
| C009-N001-<br>B1   | 121.70(11) | C00S-O1-<br>C012   | 116.91(16) |
| C00C-C003-<br>C00A | 117.98(12) | C00C-C003-<br>B1   | 120.01(12) |
| C00A-C003-<br>B1   | 121.73(12) | C006-C004-<br>C00G | 117.44(12) |
| C006-C004-<br>B1   | 120.20(11) | C00G-C004-<br>B1   | 122.09(12) |
| C00B-C005-<br>N001 | 109.87(11) | C00B-C005-<br>C008 | 120.96(12) |

|                |            |                |            |
|----------------|------------|----------------|------------|
| N001-C005-C008 | 128.82(12) | C00D-C006-C004 | 119.91(12) |
| C00D-C006-C00K | 117.26(12) | C004-C006-C00K | 122.78(12) |
| C009-C007-C00E | 121.24(13) | C009-C007-C00B | 106.83(12) |
| C00E-C007-C00B | 131.92(13) | C00I-C008-C005 | 125.54(12) |
| C00I-C008-C00N | 118.11(13) | C005-C008-C00N | 116.23(13) |
| C007-C009-C00F | 119.64(12) | C007-C009-N001 | 109.59(11) |
| C00F-C009-N001 | 130.64(12) | C00H-C00A-C003 | 119.77(13) |
| C00H-C00A-C00Y | 117.86(13) | C003-C00A-C00Y | 122.28(13) |
| C005-C00B-C00J | 121.30(14) | C005-C00B-C007 | 107.62(12) |
| C00J-C00B-C007 | 131.06(13) | C00O-C00C-C003 | 120.08(13) |
| C00O-C00C-C00X | 117.62(13) | C003-C00C-C00X | 122.30(13) |
| C00M-C00D-C006 | 122.49(14) | C00M-C00D-H00D | 118.8      |
| C006-C00D-H00D | 118.8      | C00S-C00E-C007 | 118.12(14) |
| C00S-C00E-H00E | 120.9      | C007-C00E-H00E | 120.9      |
| C00Q-C00F-C009 | 118.37(14) | C00Q-C00F-H00F | 120.8      |
| C009-C00F-H00F | 120.8      | C00R-C00G-C004 | 120.22(14) |
| C00R-C00G-C00Z | 117.86(14) | C004-C00G-C00Z | 121.90(14) |
| C00L-C00H-C00A | 122.26(14) | C00L-C00H-H00H | 118.9      |
| C00A-C00H-H00H | 118.9      | C00W-C00I-C008 | 121.19(15) |
| C00W-C00I-H00I | 119.4      | C008-C00I-H00I | 119.4      |

|                    |            |                    |            |
|--------------------|------------|--------------------|------------|
| C00P-C00J-<br>C00B | 118.77(15) | C00P-C00J-<br>H00J | 120.6      |
| C00B-C00J-<br>H00J | 120.6      | C006-C00K-<br>H00A | 109.5      |
| C006-C00K-<br>H00B | 109.5      | H00A-C00K-<br>H00B | 109.5      |
| C006-C00K-<br>H00C | 109.5      | H00A-C00K-<br>H00C | 109.5      |
| H00B-C00K-<br>H00C | 109.5      | C00H-C00L-<br>C00O | 117.78(13) |
| C00H-C00L-<br>C011 | 121.43(16) | C00O-C00L-<br>C011 | 120.79(16) |
| C00R-C00M-<br>C00D | 117.70(14) | C00R-C00M-<br>C010 | 121.35(15) |
| C00D-C00M-<br>C010 | 120.94(16) | C00V-C00N-<br>C00P | 120.77(14) |
| C00V-C00N-<br>C008 | 118.59(15) | C00P-C00N-<br>C008 | 120.59(14) |
| C00C-C00O-<br>C00L | 122.03(14) | C00C-C00O-<br>H00O | 119.0      |
| C00L-C00O-<br>H00O | 119.0      | C00J-C00P-<br>C00N | 121.78(14) |
| C00J-C00P-<br>H00P | 119.1      | C00N-C00P-<br>H00P | 119.1      |
| C00F-C00Q-<br>C00S | 121.90(14) | C00F-C00Q-<br>H00Q | 119.0      |
| C00S-C00Q-<br>H00Q | 119.0      | C00M-C00R-<br>C00G | 122.14(14) |
| C00M-C00R-<br>H00R | 118.9      | C00G-C00R-<br>H00R | 118.9      |
| C00E-C00S-<br>O1   | 125.22(15) | C00E-C00S-<br>C00Q | 120.68(13) |
| O1-C00S-<br>C00Q   | 114.10(14) | N001-B1-<br>C004   | 121.07(11) |
| N001-B1-<br>C003   | 115.23(11) | C004-B1-<br>C003   | 123.50(11) |
| C00V-C00U-<br>C00W | 120.18(15) | C00V-C00U-<br>H00U | 119.9      |
| C00W-C00U-<br>H00U | 119.9      | C00U-C00V-<br>C00N | 121.70(15) |

|                     |            |                     |       |
|---------------------|------------|---------------------|-------|
| C00U-C00V-<br>H00V  | 119.1      | C00N-C00V-<br>H00V  | 119.1 |
| C00I-C00W-<br>C00U  | 120.12(17) | C00I-C00W-<br>H00W  | 119.9 |
| C00U-C00W-<br>H00W  | 119.9      | C00C-C00X-<br>H00G  | 109.5 |
| C00C-C00X-<br>H00K  | 109.5      | H00G-C00X-<br>H00K  | 109.5 |
| C00C-C00X-<br>H00L  | 109.5      | H00G-C00X-<br>H00L  | 109.5 |
| H00K-C00X-<br>H00L  | 109.5      | C00A-C00Y-<br>H00M  | 109.5 |
| C00A-C00Y-<br>H00N  | 109.5      | H00M-C00Y-<br>H00N  | 109.5 |
| C00A-C00Y-<br>H00S  | 109.5      | H00M-C00Y-<br>H00S  | 109.5 |
| H00N-C00Y-<br>H00S  | 109.5      | C00G-C00Z-<br>H00T  | 109.5 |
| C00G-C00Z-<br>H00\$ | 109.5      | H00T-C00Z-<br>H00\$ | 109.5 |
| C00G-C00Z-<br>H00   | 109.5      | H00T-C00Z-<br>H00   | 109.5 |
| H00\$-C00Z-<br>H00  | 109.5      | C00M-C010-<br>H01A  | 109.5 |
| C00M-C010-<br>H01B  | 109.5      | H01A-C010-<br>H01B  | 109.5 |
| C00M-C010-<br>H01C  | 109.5      | H01A-C010-<br>H01C  | 109.5 |
| H01B-C010-<br>H01C  | 109.5      | C00L-C011-<br>H01D  | 109.5 |
| C00L-C011-<br>H01E  | 109.5      | H01D-C011-<br>H01E  | 109.5 |
| C00L-C011-<br>H01F  | 109.5      | H01D-C011-<br>H01F  | 109.5 |
| H01E-C011-<br>H01F  | 109.5      | O1-C012-<br>H01G    | 109.5 |
| O1-C012-<br>H01H    | 109.5      | H01G-C012-<br>H01H  | 109.5 |
| O1-C012-<br>H01I    | 109.5      | H01G-C012-<br>H01I  | 109.5 |

H01H-C012-  
H01I 109.5

**Table 6. Torsion angles (°)**

|                         |                 |                         |                 |
|-------------------------|-----------------|-------------------------|-----------------|
| C009-N001-<br>C005-C00B | 3.60(14)        | B1-N001-<br>C005-C00B   | -<br>159.11(13) |
| C009-N001-<br>C005-C008 | -<br>169.46(13) | B1-N001-<br>C005-C008   | -<br>27.8(2)    |
| C00G-C004-<br>C006-C00D | 0.63(19)        | B1-C004-<br>C006-C00D   | 174.80(12)      |
| C00G-C004-<br>C006-C00K | -<br>176.74(13) | B1-C004-<br>C006-C00K   | -<br>-2.56(19)  |
| C00B-C005-<br>C008-C00I | -<br>169.42(13) | N001-C005-<br>C008-C00I | -<br>3.0(2)     |
| C00B-C005-<br>C008-C00N | 6.47(19)        | N001-C005-<br>C008-C00N | 178.86(12)      |
| C00E-C007-<br>C009-C00F | 1.6(2)          | C00B-C007-<br>C009-C00F | -<br>179.36(12) |
| C00E-C007-<br>C009-N001 | -<br>174.66(12) | C00B-C007-<br>C009-N001 | -<br>4.38(14)   |
| C005-N001-<br>C009-C007 | -4.95(14)       | B1-N001-<br>C009-C007   | 159.57(12)      |
| C005-N001-<br>C009-C00F | 179.34(14)      | B1-N001-<br>C009-C00F   | -16.1(2)        |
| C00C-C003-<br>C00A-C00H | -3.47(19)       | B1-C003-<br>C00A-C00H   | 170.41(13)      |
| C00C-C003-<br>C00A-C00Y | -<br>179.95(14) | B1-C003-<br>C00A-C00Y   | -<br>-6.1(2)    |
| N001-C005-<br>C00B-C00J | -<br>179.76(12) | C008-C005-<br>C00B-C00J | -<br>-6.1(2)    |
| N001-C005-<br>C00B-C007 | -0.99(15)       | C008-C005-<br>C00B-C007 | 172.70(11)      |
| C009-C007-<br>C00B-C005 | -2.10(15)       | C00E-C007-<br>C00B-C005 | 176.80(14)      |
| C009-C007-<br>C00B-C00J | 176.51(14)      | C00E-C007-<br>C00B-C00J | -4.6(3)         |
| C00A-C003-<br>C00C-C00O | 3.17(19)        | B1-C003-<br>C00C-C00O   | -<br>170.81(12) |
| C00A-C003-<br>C00C-C00X | -<br>175.88(14) | B1-C003-<br>C00C-C00X   | -<br>10.1(2)    |



|                         |            |                         |                 |
|-------------------------|------------|-------------------------|-----------------|
| C004-C006-<br>C00D-C00M | 1.9(2)     | C00K-C006-<br>C00D-C00M | 179.44(13)      |
| C009-C007-<br>C00E-C00S | -0.7(2)    | C00B-C007-<br>C00E-C00S | -<br>179.49(14) |
| C007-C009-<br>C00F-C00Q | -0.5(2)    | N001-C009-<br>C00F-C00Q | 174.90(13)      |
| C006-C004-<br>C00G-C00R | -2.8(2)    | B1-C004-<br>C00G-C00R   | -<br>176.82(13) |
| C006-C004-<br>C00G-C00Z | 178.29(15) | B1-C004-<br>C00G-C00Z   | 4.2(2)          |
| C003-C00A-<br>C00H-C00L | 1.3(2)     | C00Y-C00A-<br>C00H-C00L | 177.91(15)      |
| C005-C008-<br>C00I-C00W | 178.53(14) | C00N-C008-<br>C00I-C00W | 2.7(2)          |
| C005-C00B-<br>C00J-C00P | 1.0(2)     | C007-C00B-<br>C00J-C00P | -<br>177.47(15) |
| C00A-C00H-<br>C00L-C00O | 1.3(2)     | C00A-C00H-<br>C00L-C011 | -<br>179.36(16) |
| C006-C00D-<br>C00M-C00R | -2.3(2)    | C006-C00D-<br>C00M-C010 | 176.69(15)      |
| C00I-C008-<br>C00N-C00V | -3.7(2)    | C005-C008-<br>C00N-C00V | -<br>179.91(13) |
| C00I-C008-<br>C00N-C00P | 173.97(13) | C005-C008-<br>C00N-C00P | -2.2(2)         |
| C003-C00C-<br>C00O-C00L | -0.6(2)    | C00X-C00C-<br>C00O-C00L | 178.45(15)      |
| C00H-C00L-<br>C00O-C00C | -1.6(2)    | C011-C00L-<br>C00O-C00C | 179.03(16)      |
| C00B-C00J-<br>C00P-C00N | 3.4(2)     | C00V-C00N-<br>C00P-C00J | 174.93(15)      |
| C008-C00N-<br>C00P-C00J | -2.7(2)    | C009-C00F-<br>C00Q-C00S | -1.5(2)         |
| C00D-C00M-<br>C00R-C00G | 0.0(2)     | C010-C00M-<br>C00R-C00G | -<br>178.93(16) |
| C004-C00G-<br>C00R-C00M | 2.5(2)     | C00Z-C00G-<br>C00R-C00M | -<br>178.51(17) |
| C007-C00E-<br>C00S-O1   | 178.32(15) | C007-C00E-<br>C00S-C00Q | -1.3(2)         |
| C012-O1-<br>C00S-C00E   | -3.1(3)    | C012-O1-<br>C00S-C00Q   | 176.5(2)        |

|                         |                 |                         |                 |
|-------------------------|-----------------|-------------------------|-----------------|
| C00F-C00Q-<br>C00S-C00E | 2.5(2)          | C00F-C00Q-<br>C00S-O1   | -<br>177.17(15) |
| C005-N001-<br>B1-C004   | 30.5(2)         | C009-N001-<br>B1-C004   | -<br>129.85(13) |
| C005-N001-<br>B1-C003   | -<br>154.44(12) | C009-N001-<br>B1-C003   | -<br>45.19(16)  |
| C006-C004-<br>B1-N001   | 47.79(18)       | C00G-C004-<br>B1-N001   | -<br>138.32(13) |
| C006-C004-<br>B1-C003   | -<br>126.84(14) | C00G-C004-<br>B1-C003   | -<br>47.06(19)  |
| C00C-C003-<br>B1-N001   | 50.08(17)       | C00A-C003-<br>B1-N001   | -<br>123.67(13) |
| C00C-C003-<br>B1-C004   | -<br>135.01(13) | C00A-C003-<br>B1-C004   | -<br>51.24(18)  |
| C00W-C00U-<br>C00V-C00N | 0.5(2)          | C00P-C00N-<br>C00V-C00U | -<br>175.48(15) |
| C008-C00N-<br>C00V-C00U | 2.2(2)          | C008-C00I-<br>C00W-C00U | -0.1(2)         |
| C00V-C00U-<br>C00W-C00I | -1.6(2)         |                         |                 |

## Table 7. Anisotropic atomic displacement parameters ( $\text{\AA}^2$ )

The anisotropic displacement factor exponent takes the form:

$$-2\pi^2 [ h^2 a^{*2} U_{11} + \dots + 2 h k a^* b^* U_{12} ]$$

|      | $U_{11}$  | $U_{22}$   | $U_{33}$  | $U_{23}$   | $U_{13}$   | $U_{12}$   |
|------|-----------|------------|-----------|------------|------------|------------|
| N001 | 0.0337(5) | 0.0350(5)  | 0.0350(5) | -0.0005(4) | 0.0042(4)  | -0.0034(4) |
| O1   | 0.0775(9) | 0.1025(11) | 0.0486(7) | -0.0303(7) | 0.0113(6)  | -0.0202(8) |
| C003 | 0.0376(7) | 0.0314(6)  | 0.0374(6) | -0.0028(5) | 0.0005(5)  | -0.0023(5) |
| C004 | 0.0352(6) | 0.0348(6)  | 0.0366(7) | -0.0035(5) | 0.0031(5)  | -0.0013(5) |
| C005 | 0.0296(6) | 0.0334(6)  | 0.0441(7) | 0.0034(5)  | 0.0008(5)  | 0.0000(5)  |
| C006 | 0.0337(6) | 0.0359(7)  | 0.0397(7) | -0.0019(5) | 0.0048(5)  | -0.0013(5) |
| C007 | 0.0342(6) | 0.0385(7)  | 0.0415(7) | -0.0006(5) | -0.0042(5) | 0.0015(5)  |
| C008 | 0.0334(6) | 0.0365(7)  | 0.0467(7) | 0.0082(6)  | 0.0051(5)  | 0.0046(5)  |
| C009 | 0.0355(6) | 0.0372(7)  | 0.0356(6) | -0.0016(5) | -0.0002(5) | 0.0014(5)  |
| C00A | 0.0381(7) | 0.0369(7)  | 0.0430(7) | -0.0018(6) | 0.0005(5)  | -0.0039(5) |
| C00B | 0.0331(6) | 0.0371(7)  | 0.0486(8) | 0.0000(6)  | -0.0029(5) | -0.0002(5) |
| C00C | 0.0430(7) | 0.0341(7)  | 0.0446(7) | -0.0031(6) | -0.0001(6) | 0.0015(5)  |
| C00D | 0.0410(7) | 0.0415(7)  | 0.0468(8) | 0.0039(6)  | 0.0038(6)  | 0.0042(6)  |

|      | U <sub>11</sub> | U <sub>22</sub> | U <sub>33</sub> | U <sub>23</sub>         | U <sub>13</sub>         | U <sub>12</sub>         |
|------|-----------------|-----------------|-----------------|-------------------------|-------------------------|-------------------------|
| C00E | 0.0430(7)       | 0.0487(8)       | 0.0473(8)       | -0.0095(6)              | -0.0083(6)              | -0.0024(6)              |
| C00F | 0.0430(7)       | 0.0476(8)       | 0.0408(7)       | -0.0033(6)              | 0.0054(6)               | -0.0067(6)              |
| C00G | 0.0497(8)       | 0.0418(7)       | 0.0430(7)       | -0.0085(6)              | 0.0006(6)               | 0.0007(6)               |
| C00H | 0.0427(7)       | 0.0447(8)       | 0.0499(8)       | -0.0015(6)              | 0.0078(6)               | -0.0076(6)              |
| C00I | 0.0431(7)       | 0.0429(7)       | 0.0487(8)       | 0.0042(6)               | 0.0105(6)               | 0.0045(6)               |
| C00J | 0.0393(7)       | 0.0461(8)       | 0.0636(9)       | -0.0022(7)              | -0.0033(7)              | -0.0087(6)              |
| C00K | 0.0540(8)       | 0.0351(7)       | 0.0503(8)       | -0.0070(6)              | -0.0001(6)              | 0.0050(6)               |
| C00L | 0.0616(9)       | 0.0399(7)       | 0.0446(8)       | 0.0019(6)               | 0.0100(7)               | -0.0068(7)              |
| C00M | 0.0433(7)       | 0.0602(9)       | 0.0399(7)       | 0.0019(7)               | -0.0005(6)              | 0.0033(7)               |
| C00N | 0.0339(7)       | 0.0437(8)       | 0.0621(9)       | 0.0144(7)               | 0.0077(6)               | 0.0020(6)               |
| C00O | 0.0598(9)       | 0.0341(7)       | 0.0451(8)       | 0.0026(6)               | 0.0006(6)               | 0.0048(6)               |
| C00P | 0.0371(7)       | 0.0480(8)       | 0.0771(11)      | 0.0059(8)               | 0.0032(7)               | -0.0114(6)              |
| C00Q | 0.0455(8)       | 0.0576(9)       | 0.0415(8)       | -0.0022(7)              | 0.0073(6)               | -0.0008(7)              |
| C00R | 0.0569(9)       | 0.0579(9)       | 0.0388(7)       | -0.0123(7)              | -0.0031(6)              | 0.0021(7)               |
| C00S | 0.0472(8)       | 0.0608(9)       | 0.0389(7)       | -0.0087(7)              | -0.0006(6)              | 0.0034(7)               |
| B1   | 0.0327(7)       | 0.0307(7)       | 0.0401(7)       | -0.0048(6)              | 0.0053(6)               | 0.0019(5)               |
| C00U | 0.0537(9)       | 0.0615(10)      | 0.0653(10)      | 0.0208(9)               | 0.0277(8)               | 0.0150(8)               |
| C00V | 0.0421(8)       | 0.0547(9)       | 0.0743(11)      | 0.0201(8)               | 0.0180(7)               | 0.0038(7)               |
| C00W | 0.0605(9)       | 0.0534(9)       | 0.0519(9)       | 0.0062(7)               | 0.0180(7)               | 0.0133(7)               |
| C00X | 0.0460(9)       | 0.0521(9)       | 0.0971(14)      | 0.0128(9)               | 0.0020(9)               | 0.0106(7)               |
| C00Y | 0.0383(8)       | 0.0615(10)      | 0.0796(12)      | 0.0190(9)               | 0.0034(7)               | 0.0029(7)               |
| C00Z | 0.1039(15)      | 0.0446(9)       | 0.0587(10)      | -0.0176(8)              | <sup>-</sup> 0.0070(10) | 0.0085(9)               |
| C010 | 0.0793(13)      | 0.0898(14)      | 0.0474(9)       | 0.0087(9)               | -0.0094(8)              | 0.0140(11)              |
| C011 | 0.0866(14)      | 0.0669(12)      | 0.0801(13)      | 0.0276(10)              | 0.0212(11)              | <sup>-</sup> 0.0074(10) |
| C012 | 0.133(2)        | 0.171(3)        | 0.0822(16)      | <sup>-</sup> 0.0773(19) | 0.0305(15)              | -0.071(2)               |

**Table 8. Hydrogen atomic coordinates and isotropic atomic displacement parameters (Å<sup>2</sup>)**

|      | x/a    | y/b     | z/c    | U(eq) |
|------|--------|---------|--------|-------|
| H00D | 0.8698 | -0.0672 | 0.4968 | 0.052 |
| H00E | 0.5818 | -0.0449 | 0.2193 | 0.056 |

|       | <b>x/a</b> | <b>y/b</b> | <b>z/c</b> | <b>U(eq)</b> |
|-------|------------|------------|------------|--------------|
| H00F  | 0.8088     | 0.3540     | 0.2758     | 0.052        |
| H00H  | 1.0275     | 0.6048     | 0.3245     | 0.055        |
| H00I  | 0.6050     | 0.3501     | 0.4517     | 0.054        |
| H00J  | 0.4530     | -0.0993    | 0.2982     | 0.06         |
| H00A  | 0.8408     | -0.1110    | 0.4100     | 0.07         |
| H00B  | 0.8294     | 0.0304     | 0.3706     | 0.07         |
| H00C  | 0.7321     | -0.0422    | 0.3944     | 0.07         |
| H00O  | 0.7514     | 0.7905     | 0.2927     | 0.056        |
| H00P  | 0.3703     | -0.1107    | 0.3742     | 0.065        |
| H00Q  | 0.8114     | 0.2510     | 0.1925     | 0.058        |
| H00R  | 0.8542     | 0.3557     | 0.5622     | 0.062        |
| H00U  | 0.3728     | 0.1668     | 0.5274     | 0.071        |
| H00V  | 0.3386     | -0.0060    | 0.4611     | 0.068        |
| H00W  | 0.5048     | 0.3498     | 0.5224     | 0.066        |
| H00G  | 0.6113     | 0.7124     | 0.3401     | 0.098        |
| H00K  | 0.6162     | 0.5605     | 0.3751     | 0.098        |
| H00L  | 0.5987     | 0.5458     | 0.3140     | 0.098        |
| H00M  | 1.0555     | 0.3811     | 0.3706     | 0.09         |
| H00N  | 0.9660     | 0.2580     | 0.3684     | 0.09         |
| H00S  | 0.9857     | 0.3645     | 0.4181     | 0.09         |
| H00T  | 0.7859     | 0.5705     | 0.5190     | 0.104        |
| H00\$ | 0.7266     | 0.5518     | 0.4643     | 0.104        |
| H00   | 0.8449     | 0.5829     | 0.4675     | 0.104        |
| H01A  | 0.8464     | 0.0264     | 0.6085     | 0.109        |
| H01B  | 0.9401     | 0.1421     | 0.6110     | 0.109        |
| H01C  | 0.9493     | -0.0236    | 0.5846     | 0.109        |
| H01D  | 0.9875     | 0.9094     | 0.2930     | 0.116        |
| H01E  | 0.8904     | 0.9077     | 0.2541     | 0.116        |
| H01F  | 0.9833     | 0.7972     | 0.2442     | 0.116        |
| H01G  | 0.6651     | -0.1774    | 0.1544     | 0.191        |
| H01H  | 0.6740     | -0.1199    | 0.0966     | 0.191        |
| H01I  | 0.5837     | -0.0604    | 0.1292     | 0.191        |

Zoom aromatic region

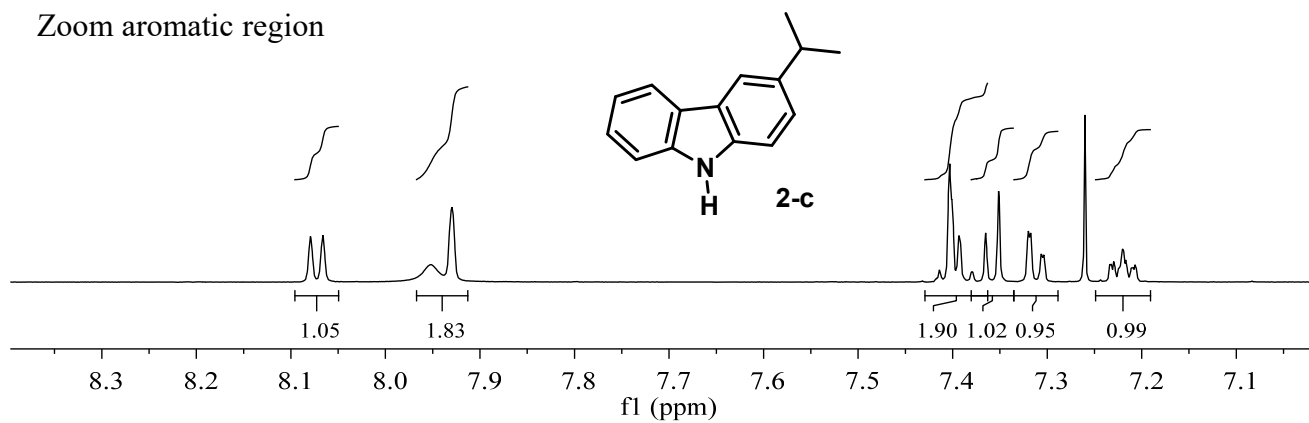

$^1\text{H}$  NMR 600 MHz in  $\text{CDCl}_3$

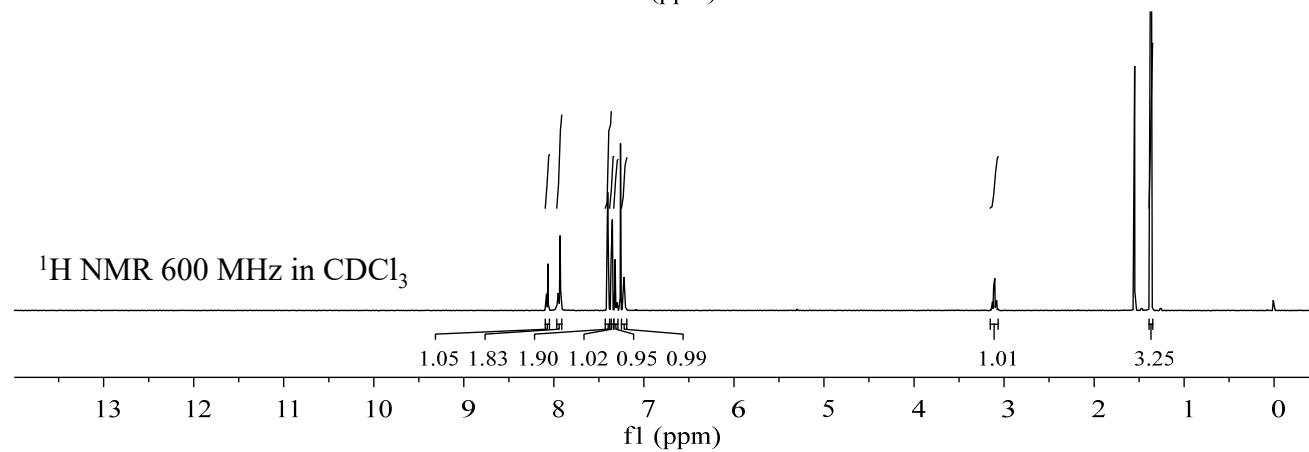

$^{13}\text{C}$  NMR 151 MHz in  $\text{CDCl}_3$

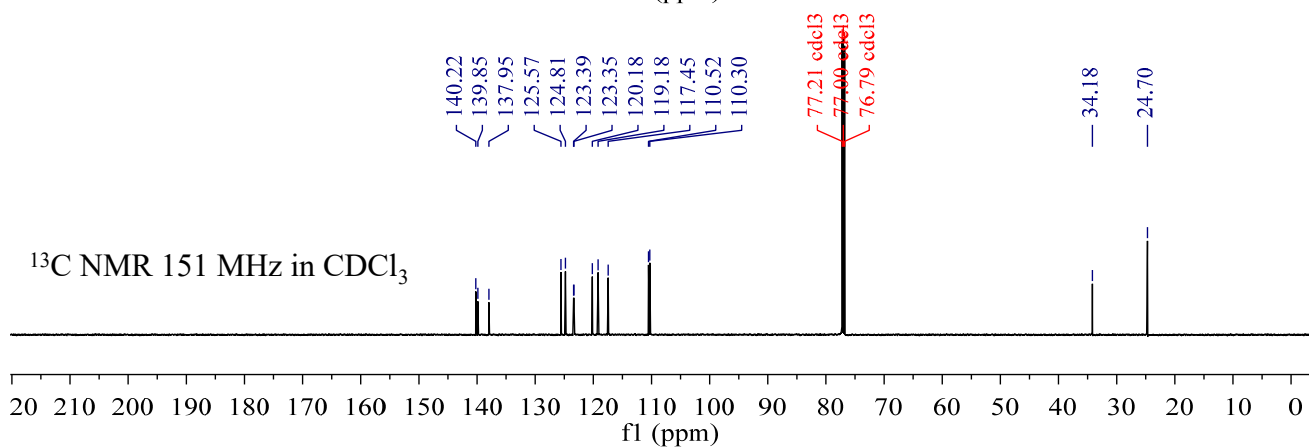

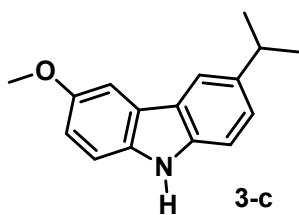

Zoom aromatic region

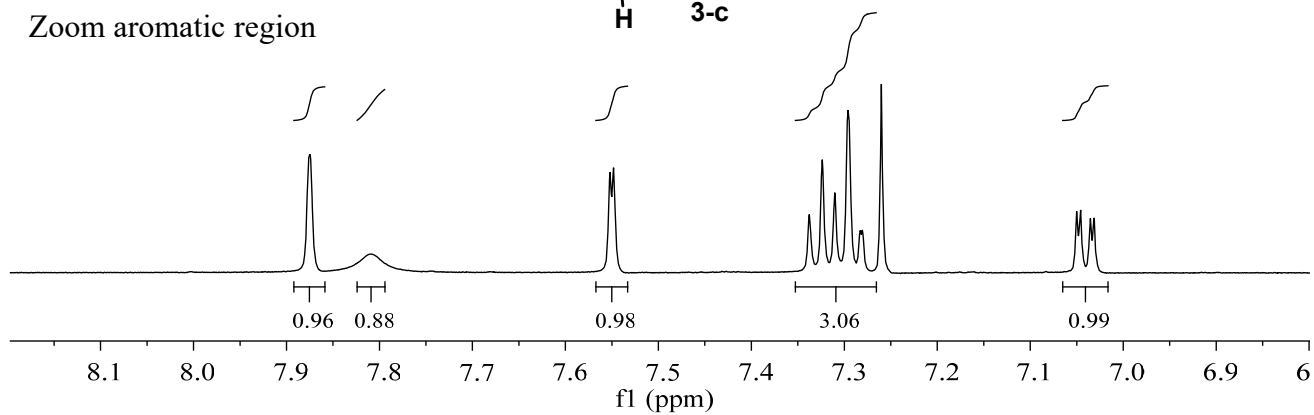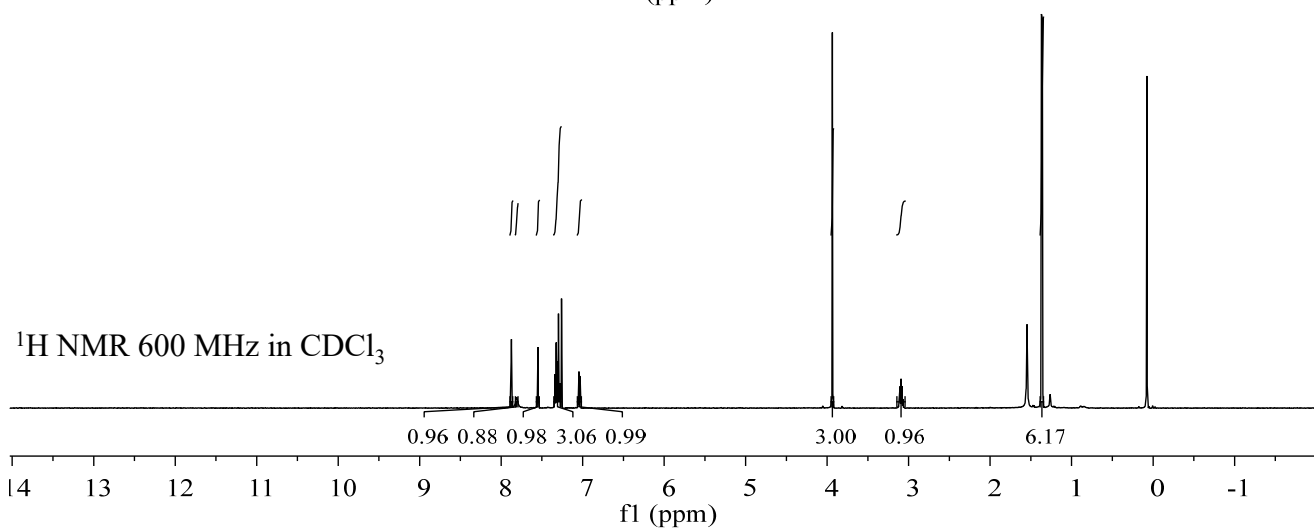

<sup>13</sup>C NMR 151 MHz in CDCl<sub>3</sub>

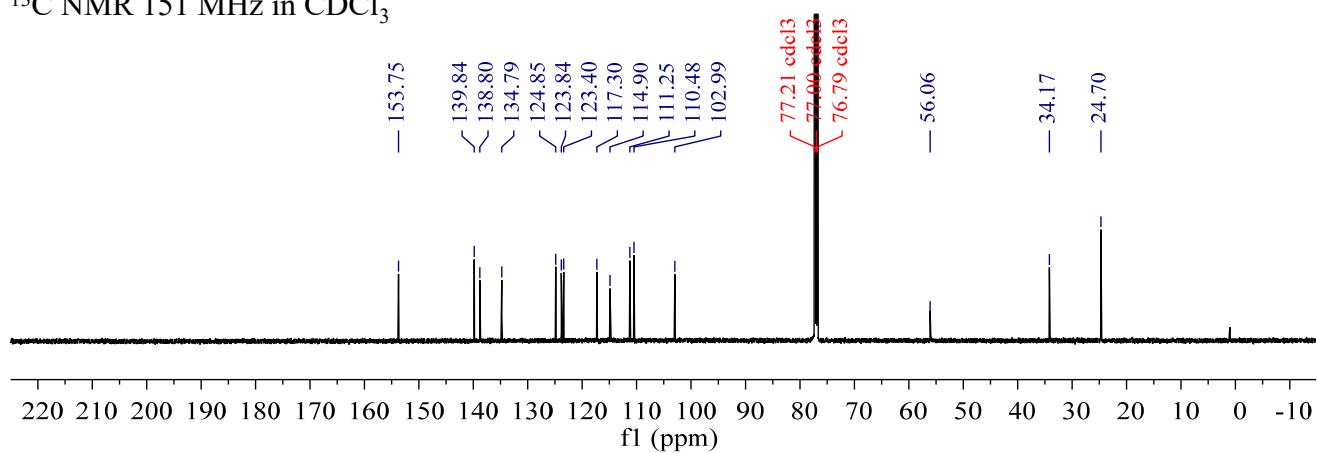

Zoom aromatic region

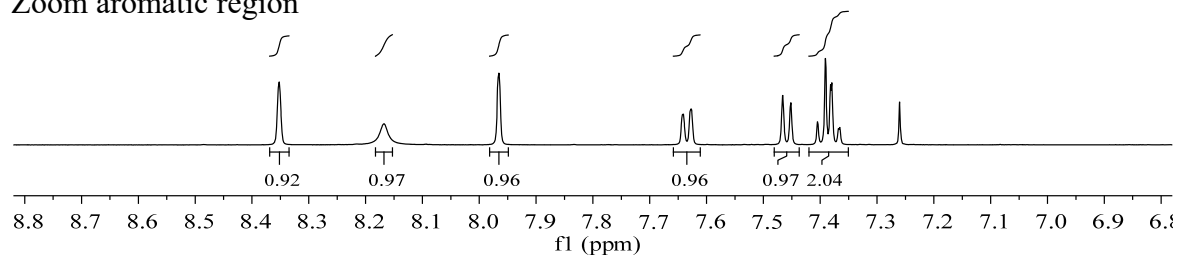

$^1\text{H}$  NMR 600 MHz in  $\text{CDCl}_3$

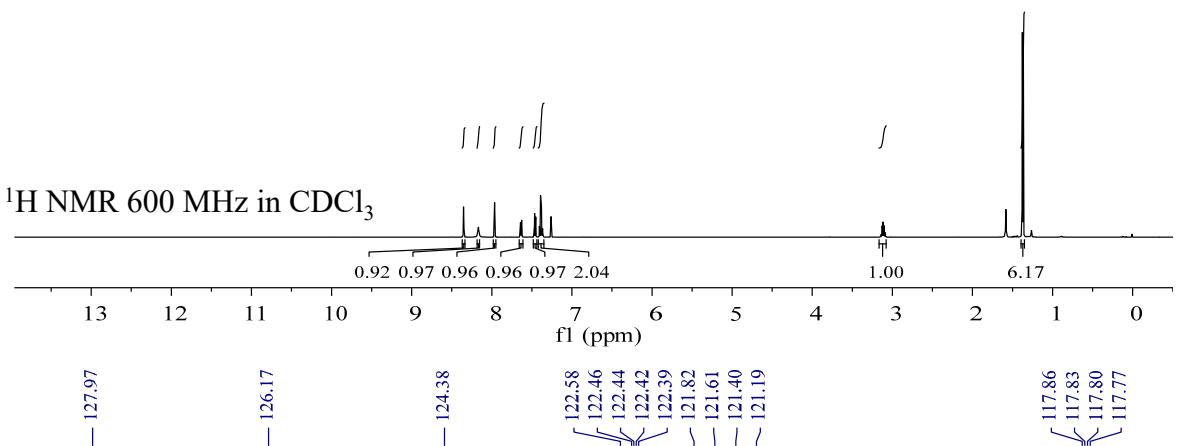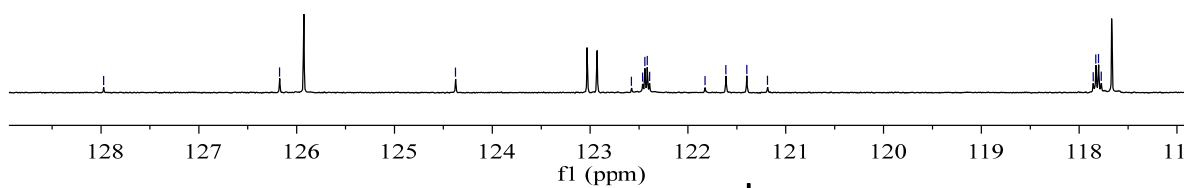

$^{13}\text{C}$  NMR 151 MHz in  $\text{CDCl}_3$

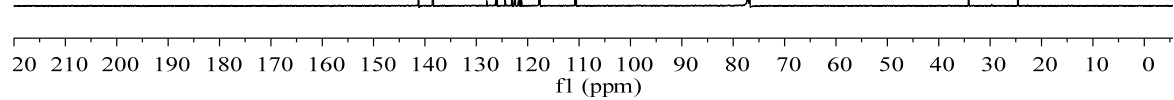

$^{19}\text{F}$  NMR 376 MHz in  $\text{CDCl}_3$

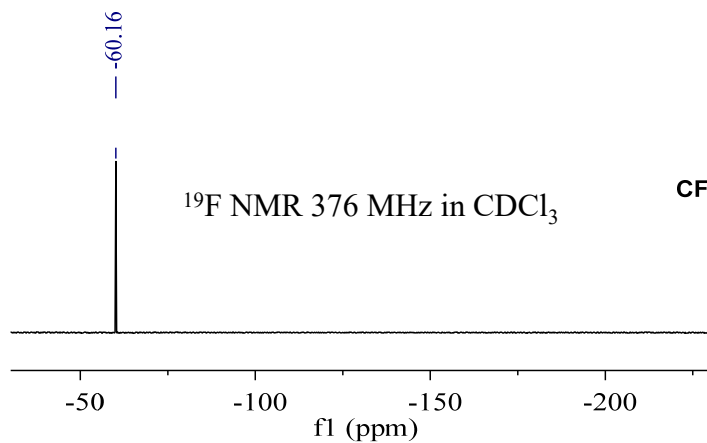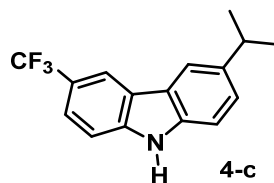

Zoom aromatic region

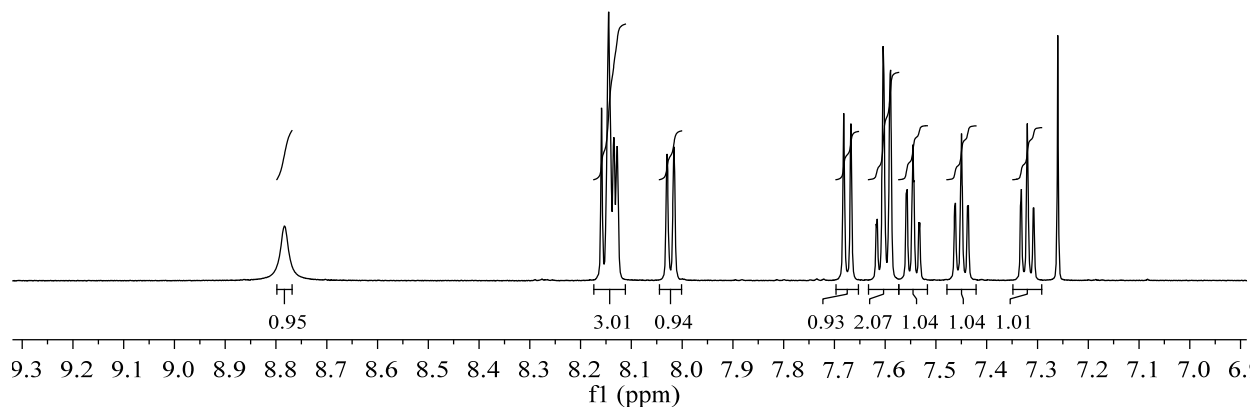

$^1\text{H}$  NMR 600 MHz in  $\text{CDCl}_3$

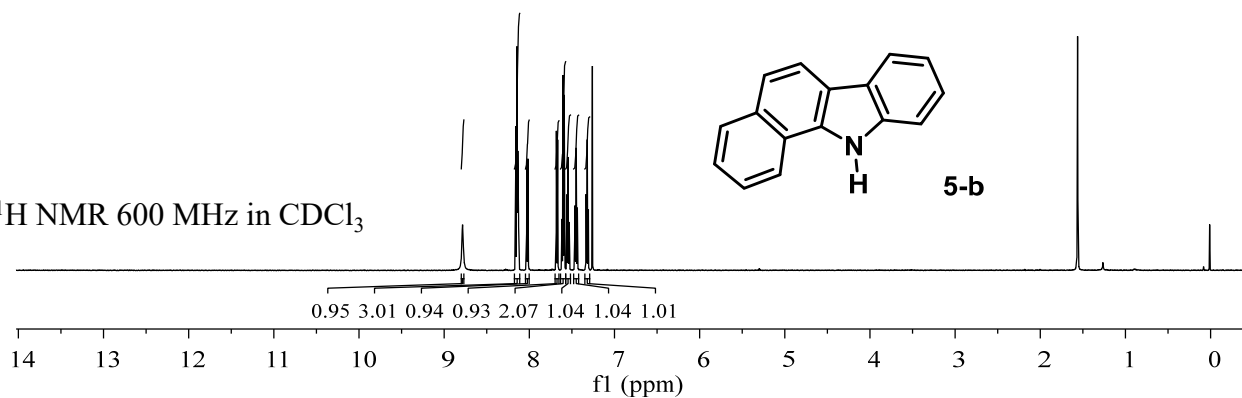

$^{13}\text{C}$  NMR 151 MHz in  $\text{CDCl}_3$

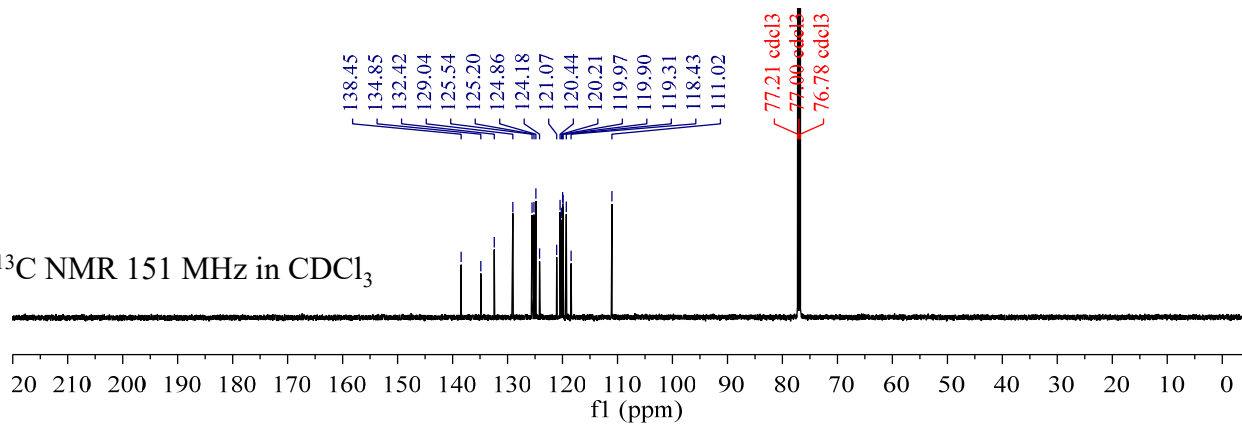



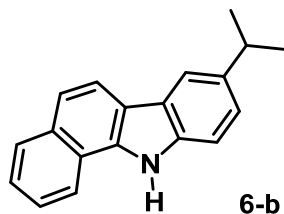

Zoom aromatic region

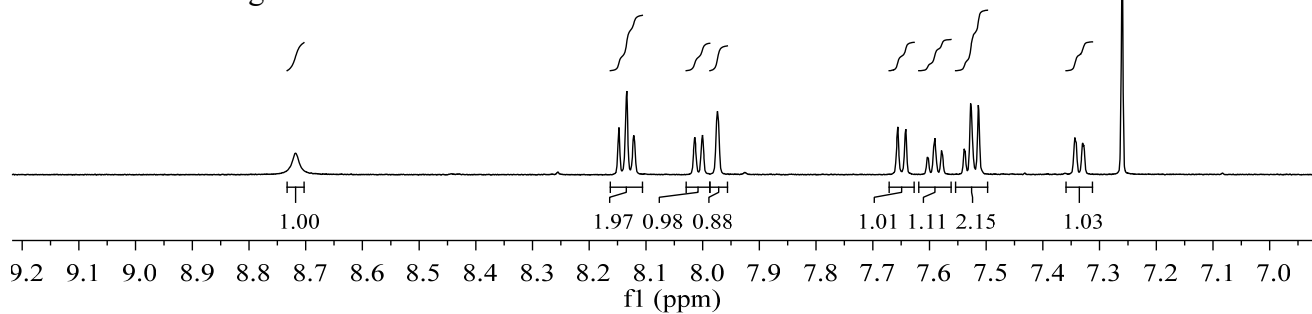

$^1\text{H}$  NMR 600 MHz in  $\text{CDCl}_3$

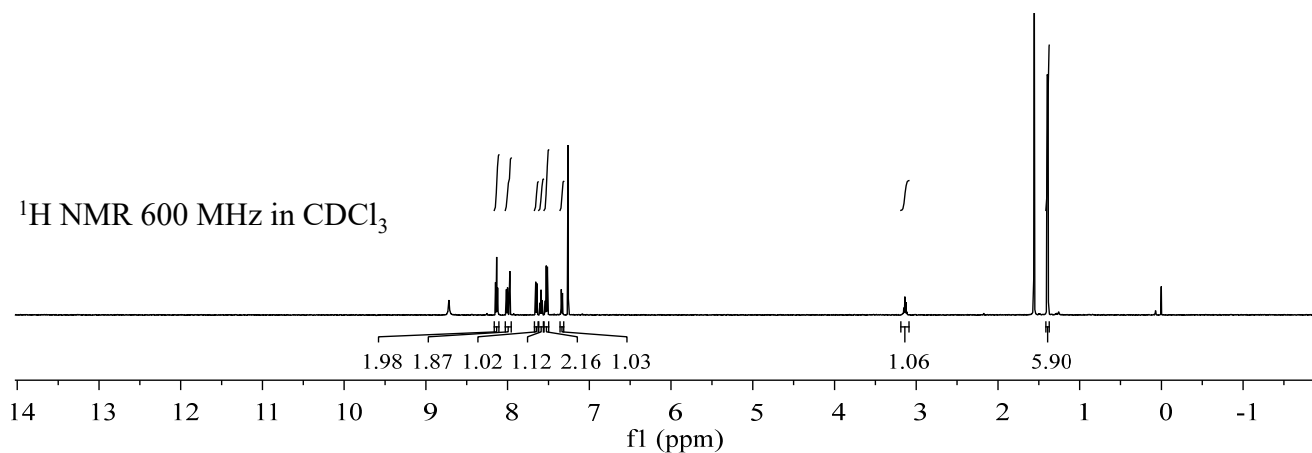

$^{13}\text{C}$  NMR 151 MHz in  $\text{CDCl}_3$

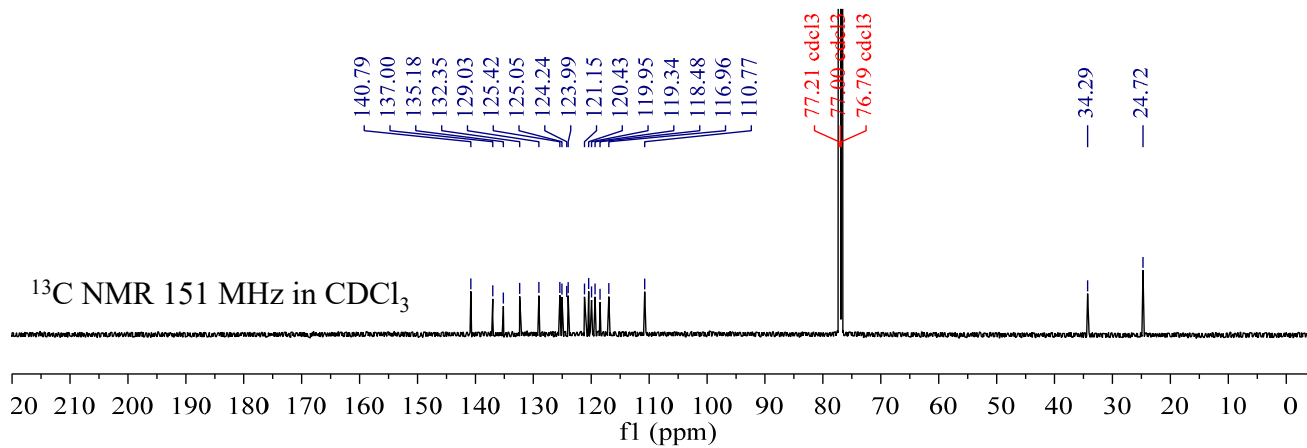

Zoom aromatic region

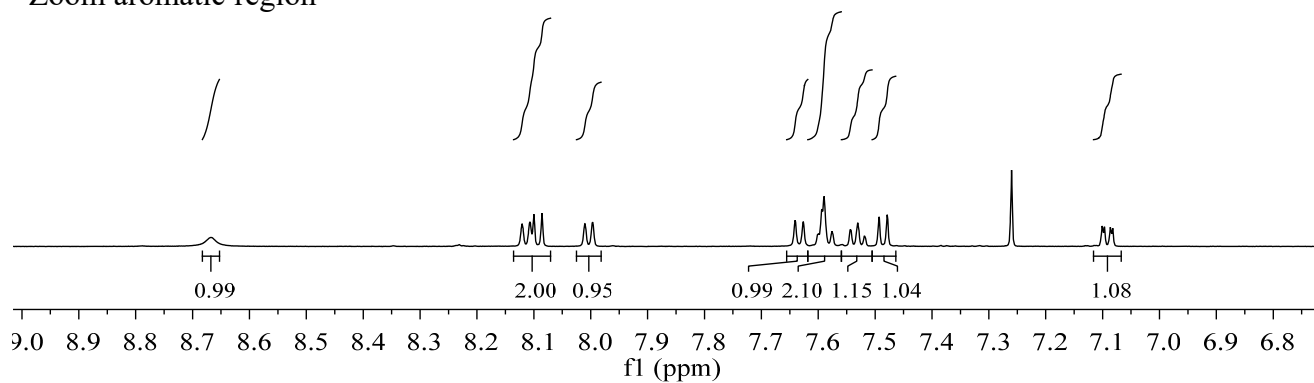

<sup>1</sup>H NMR 600 MHz in CDCl<sub>3</sub>

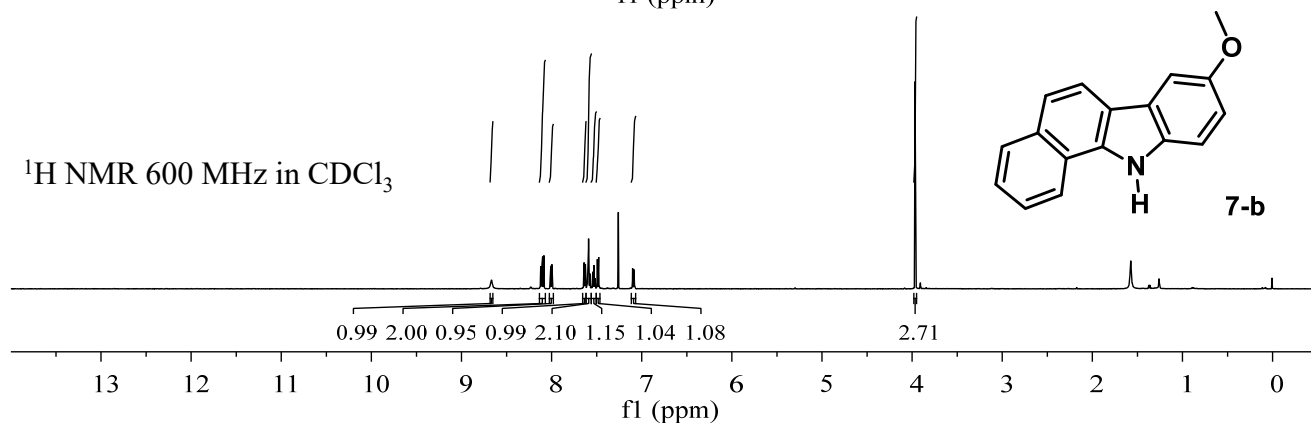

<sup>13</sup>C NMR 151 MHz in CDCl<sub>3</sub>

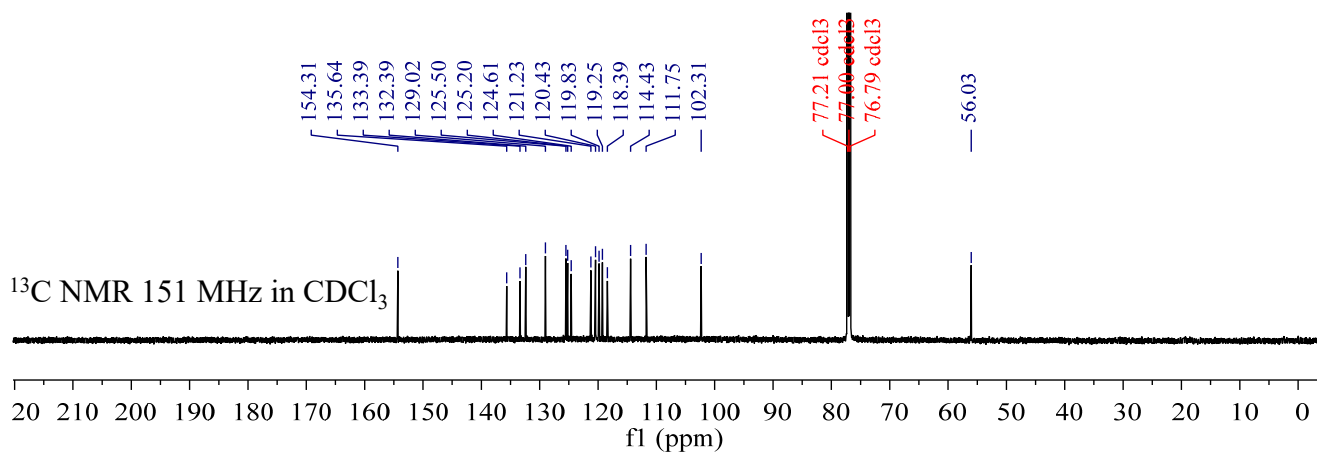

Zoom aromatic region

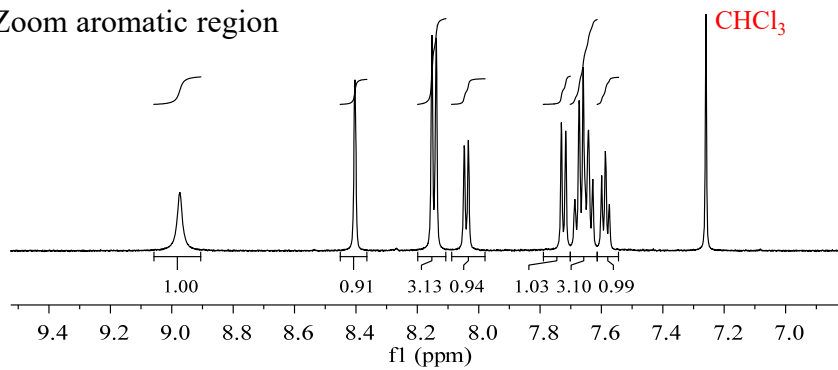

<sup>1</sup>H NMR 600 MHz in CDCl<sub>3</sub>

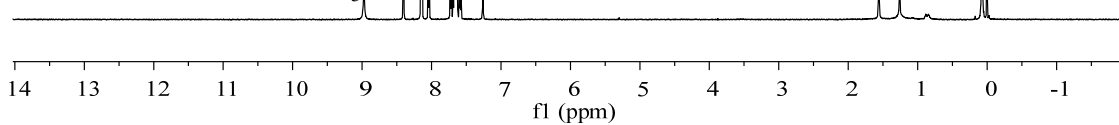

Zoom aromatic region

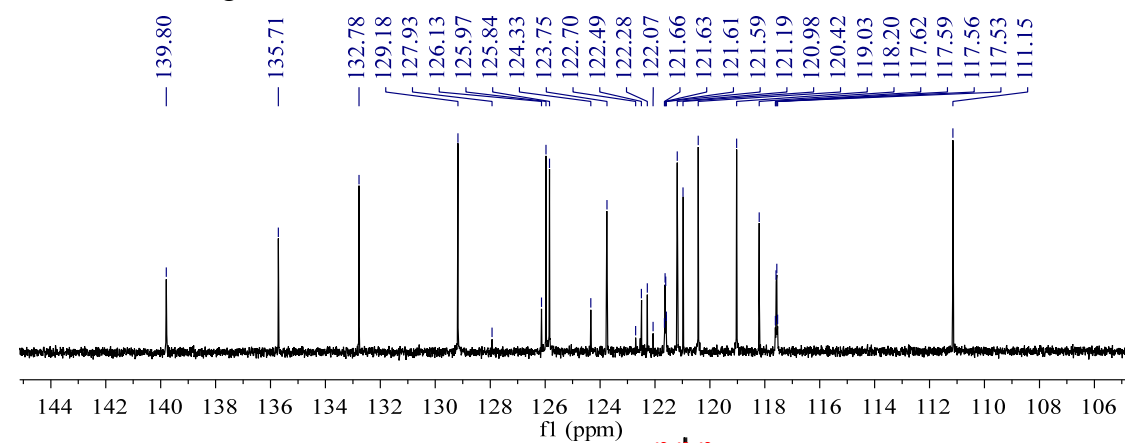

<sup>13</sup>C NMR 151 MHz in CDCl<sub>3</sub>

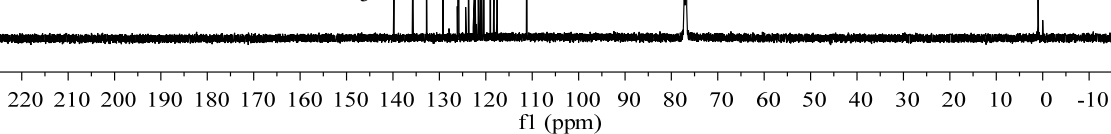

-62.13

<sup>19</sup>F NMR 376 MHz in CDCl<sub>3</sub>

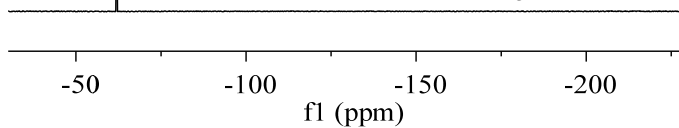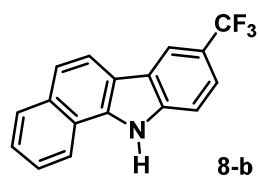

Zoom aromatic region

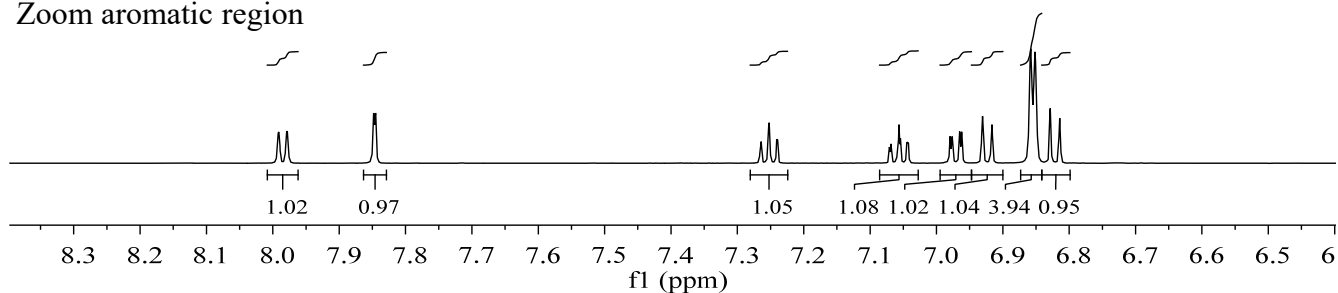

Zoom aliphatic region

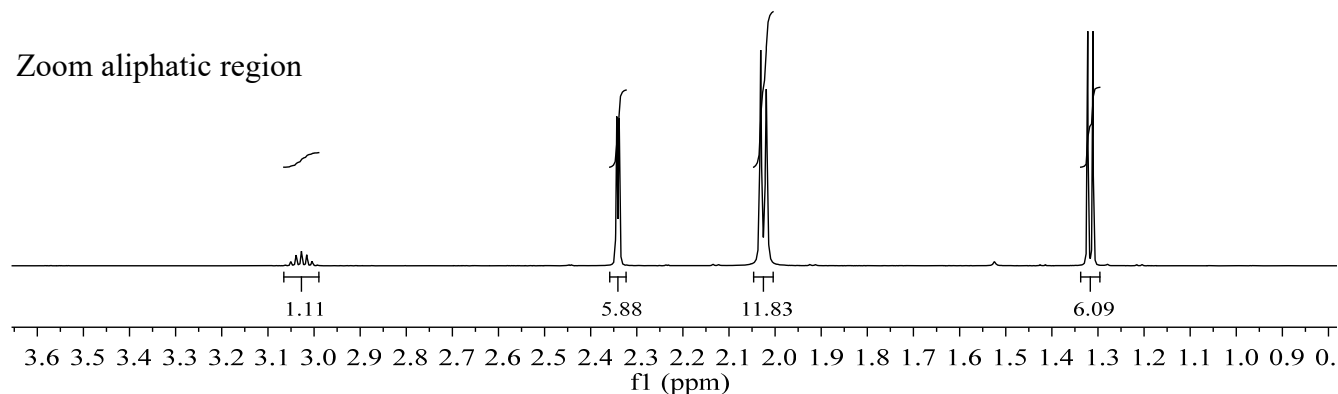

$^1\text{H}$  NMR 600 MHz in  $\text{CD}_2\text{Cl}_2$

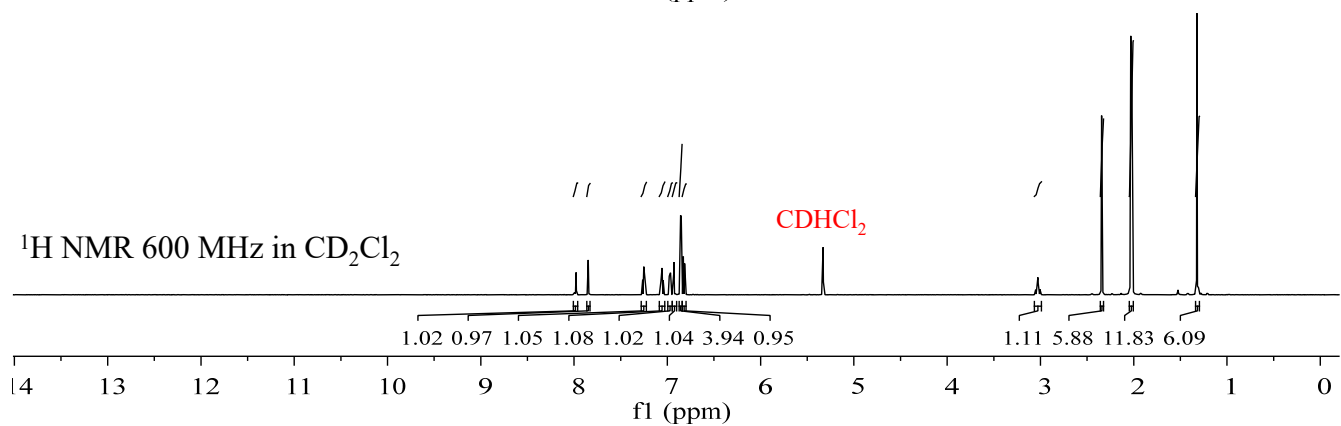

$^{13}\text{C}$  NMR 151 MHz in  $\text{CD}_2\text{Cl}_2$

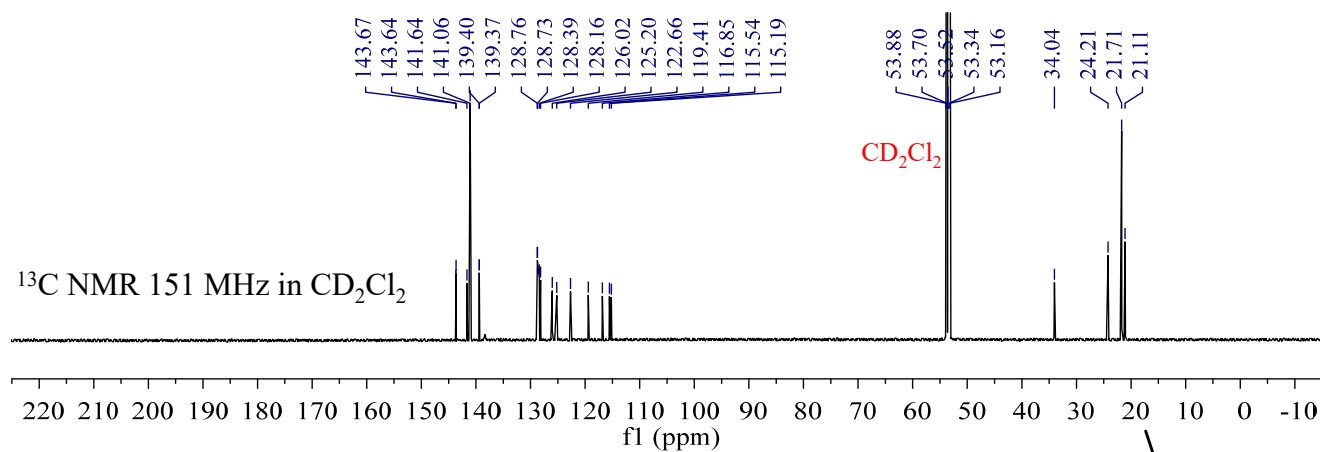

$^{11}\text{B}$  NMR 192 MHz in  $\text{CD}_2\text{Cl}_2$

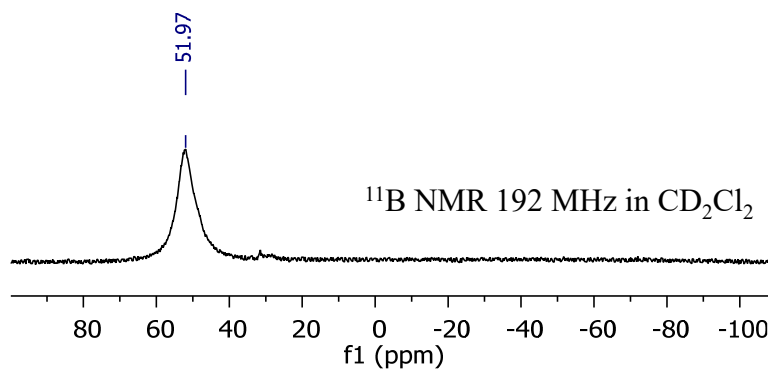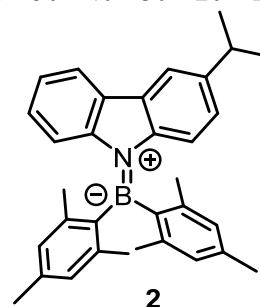

# 1° eluted HPLC

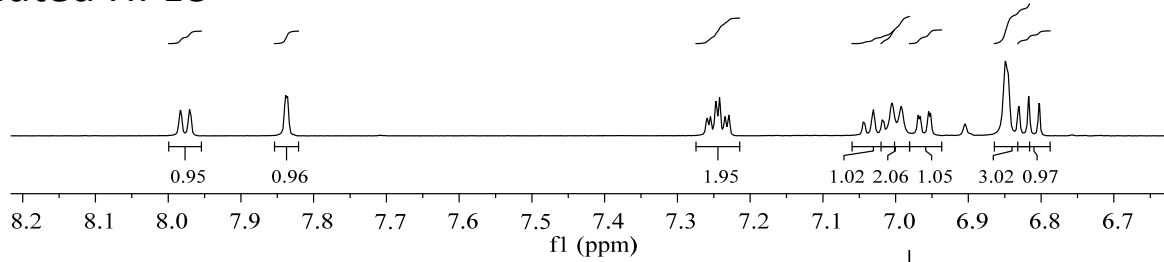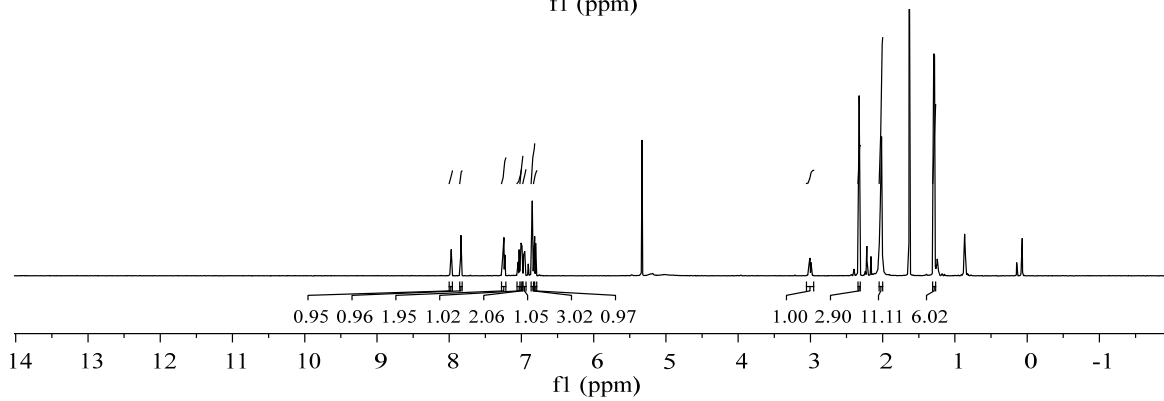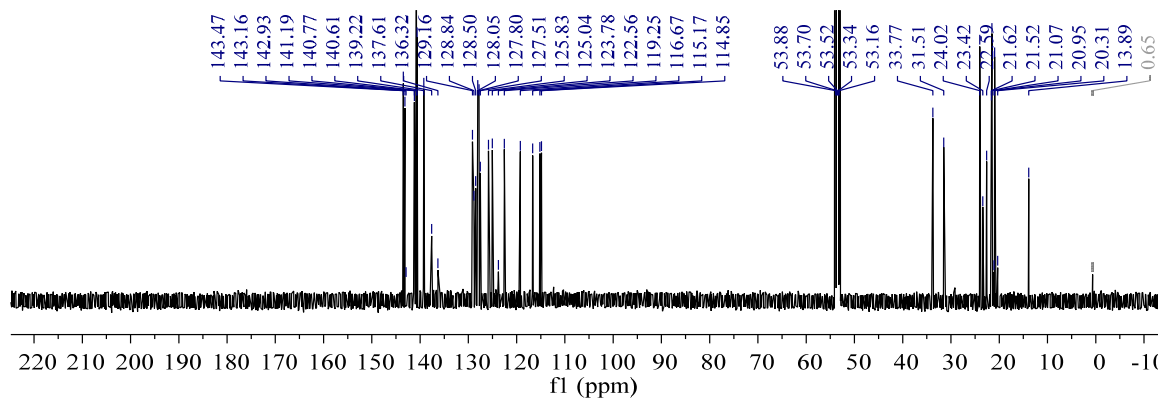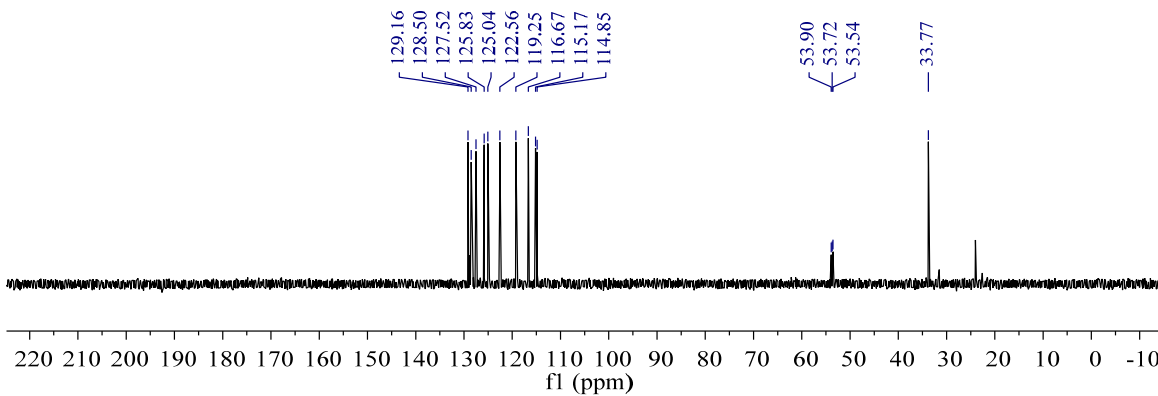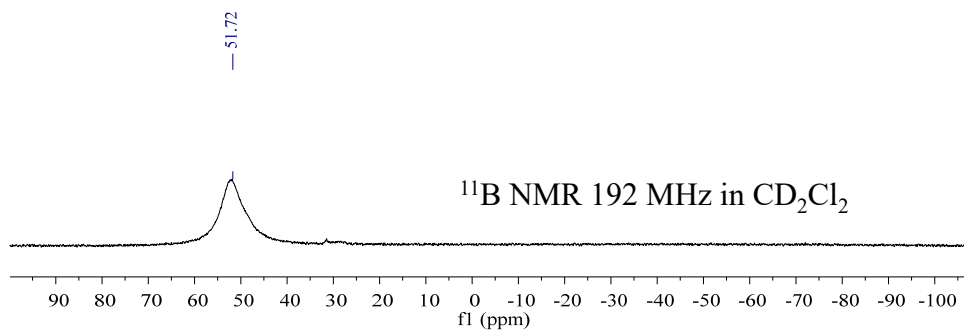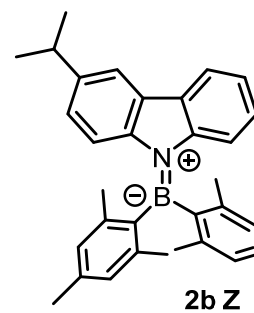

## 2° eluted HPLC

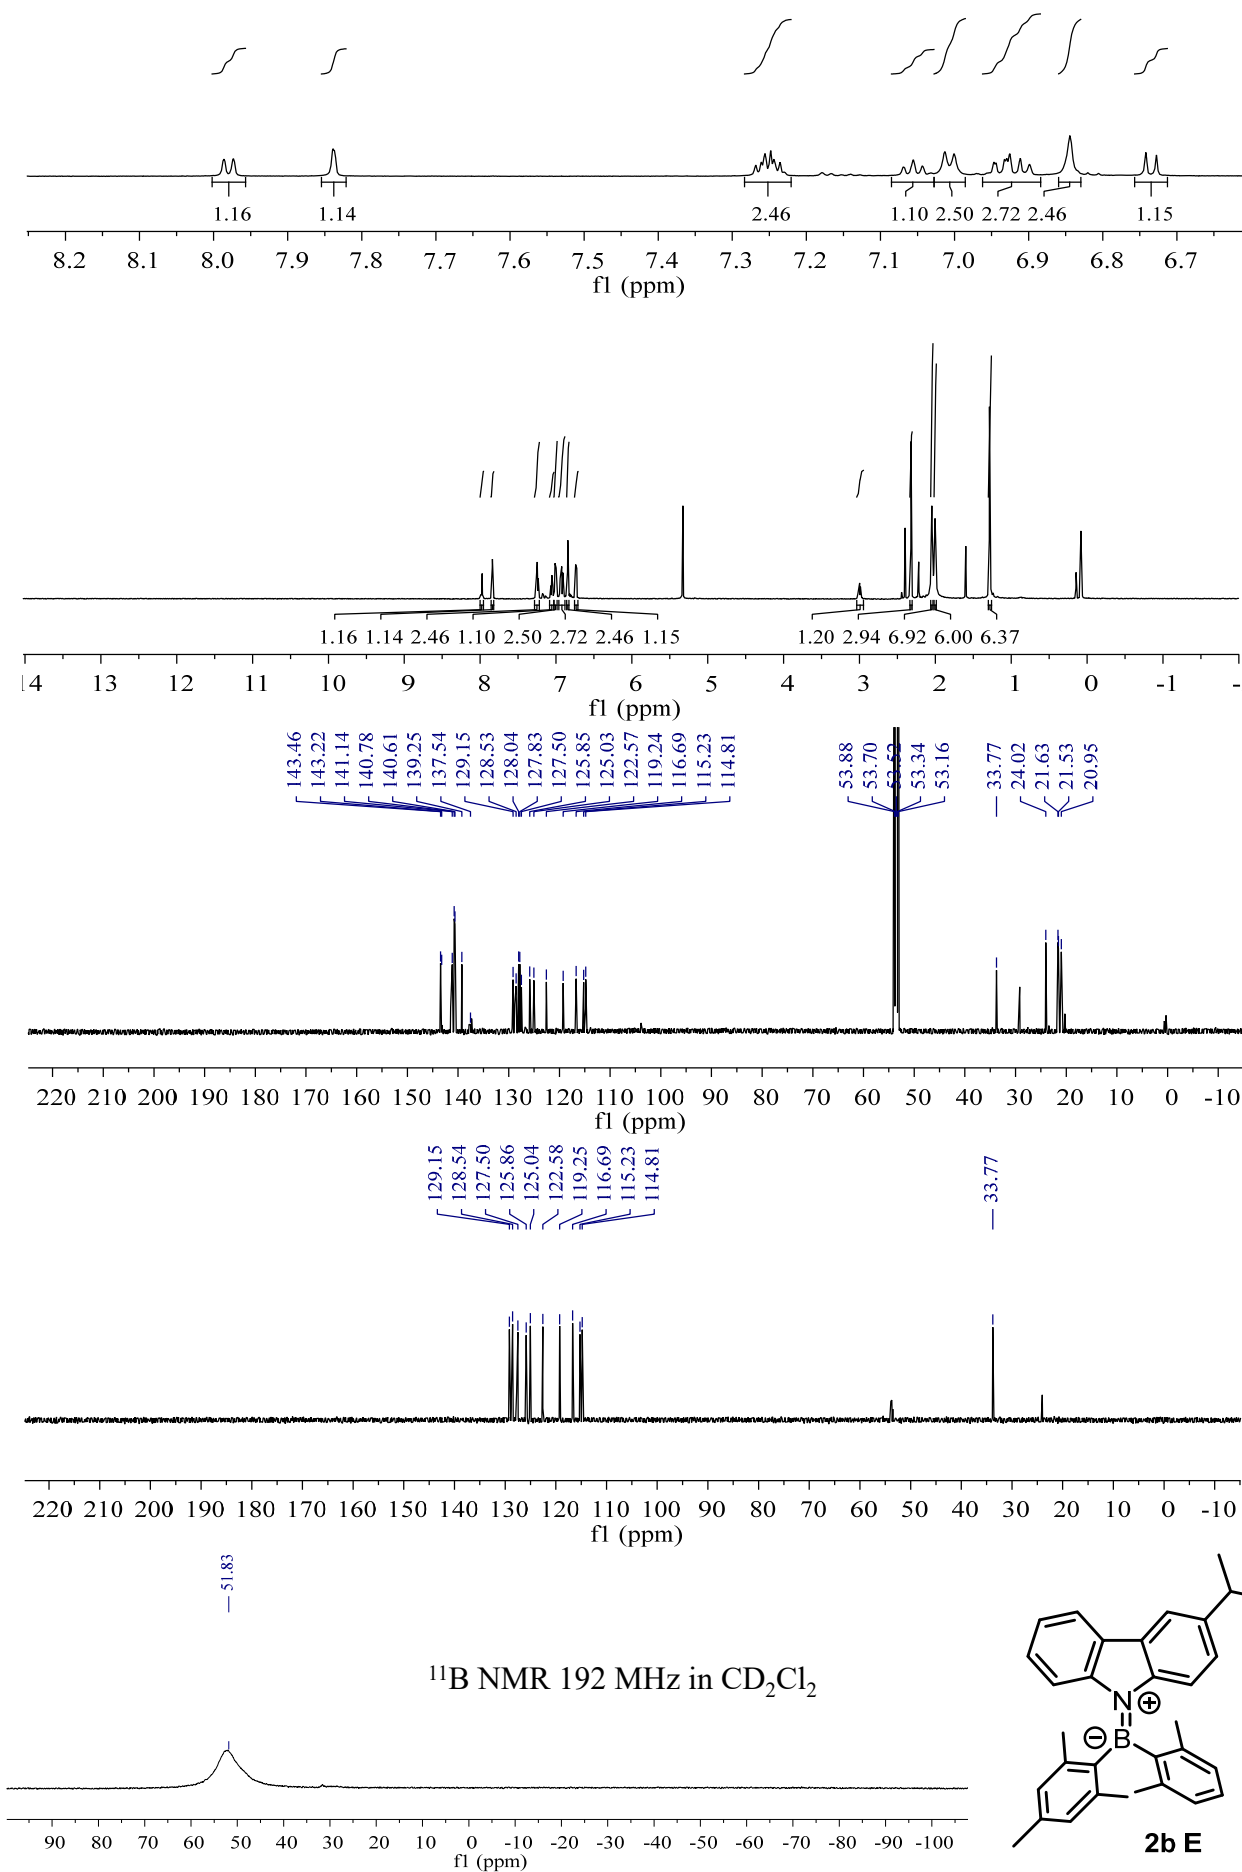

Zoom aromatic region

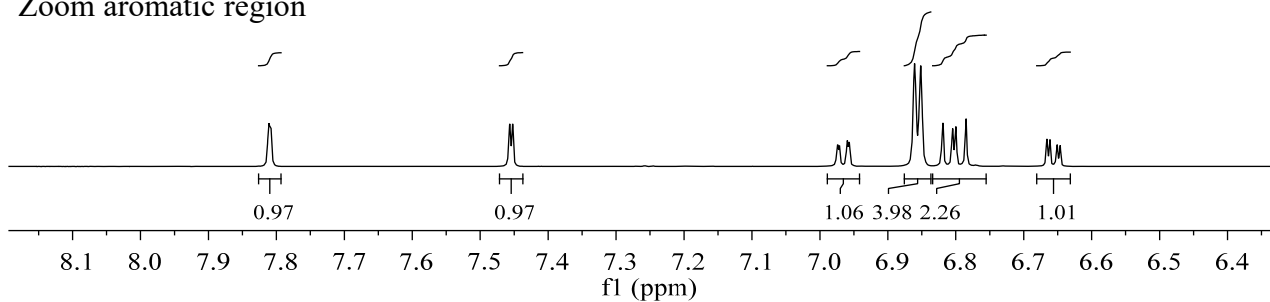

Zoom aliphatic region

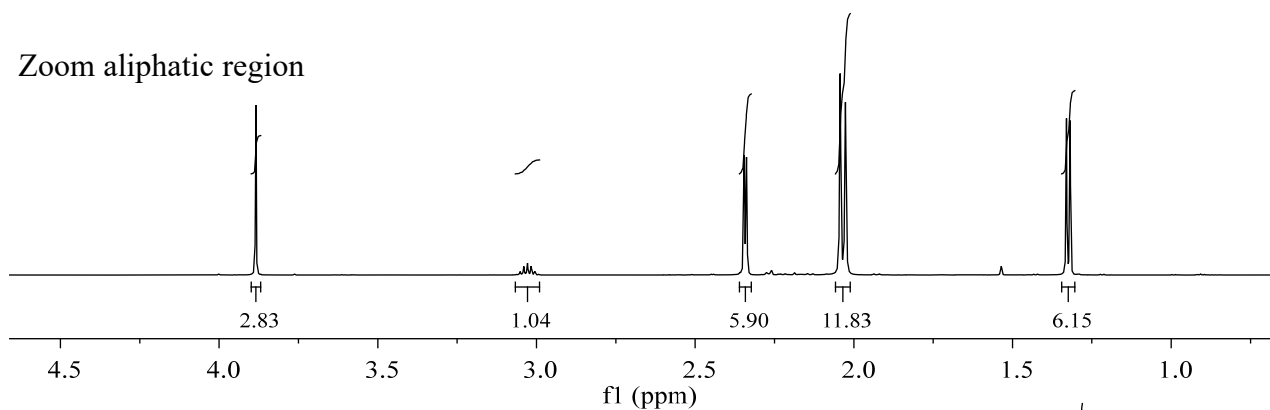

$^1\text{H}$  NMR 600 MHz in  $\text{CD}_2\text{Cl}_2$

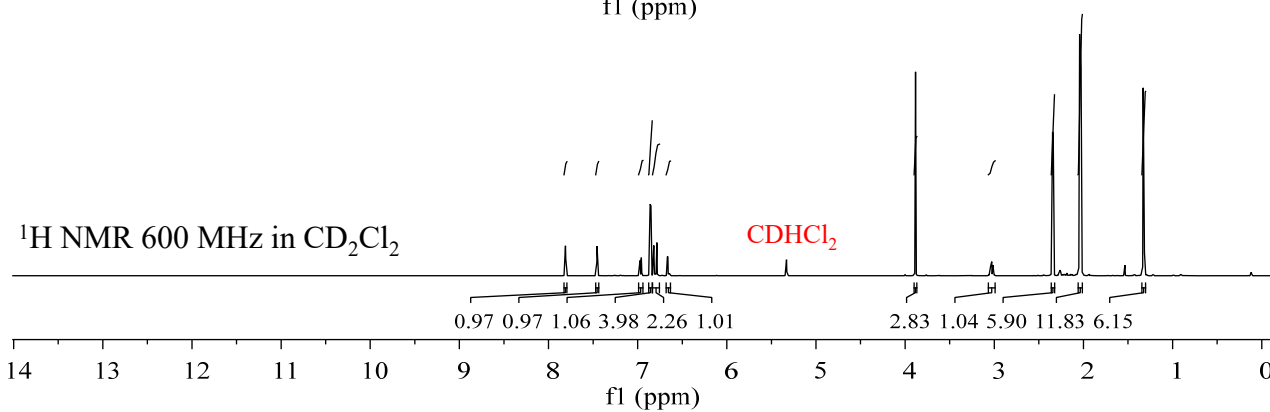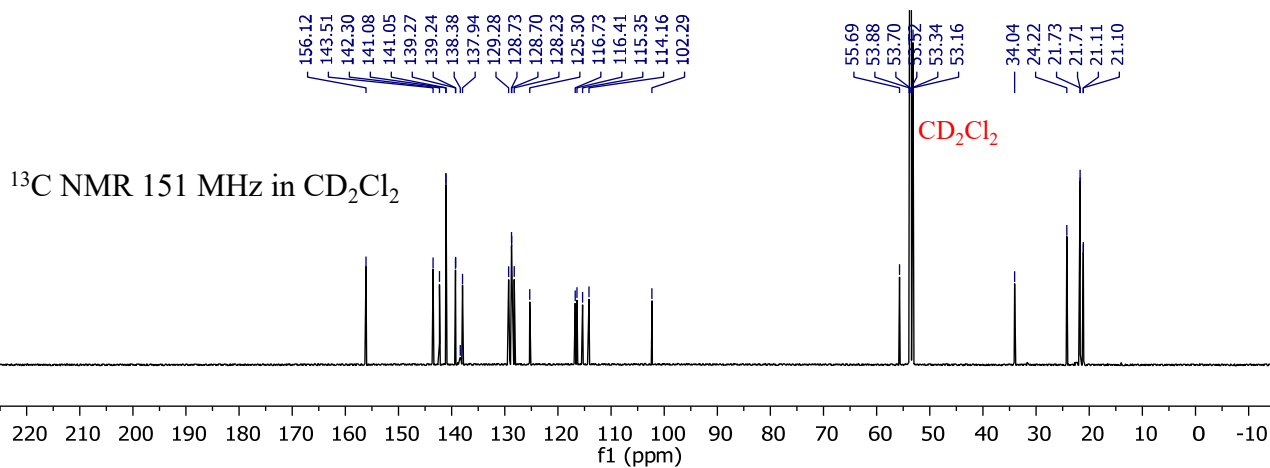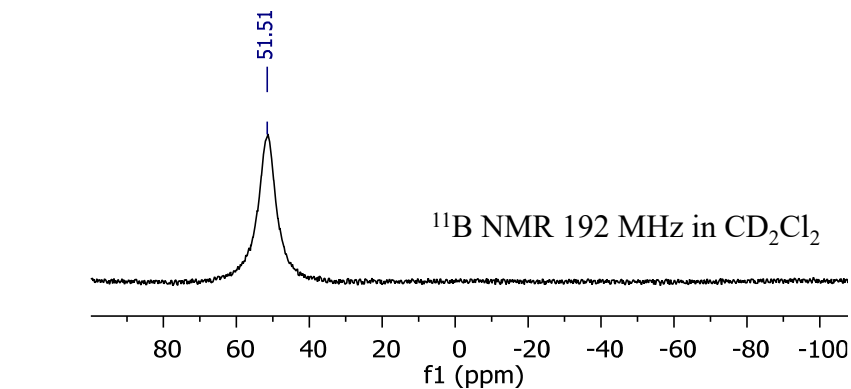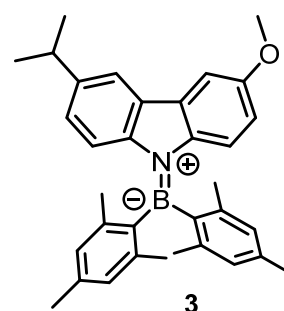

Zoom aromatic region

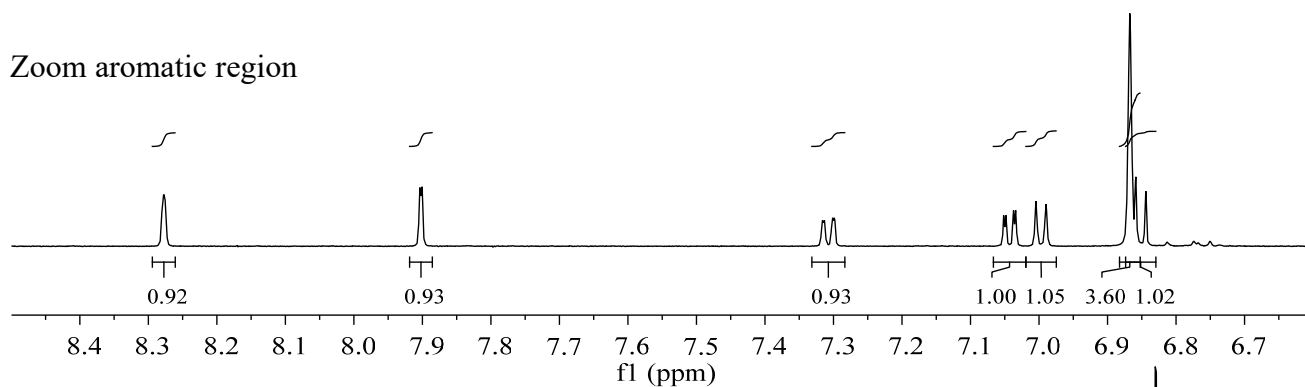

$^1\text{H}$  NMR 600 MHz in  $\text{CD}_2\text{Cl}_2$

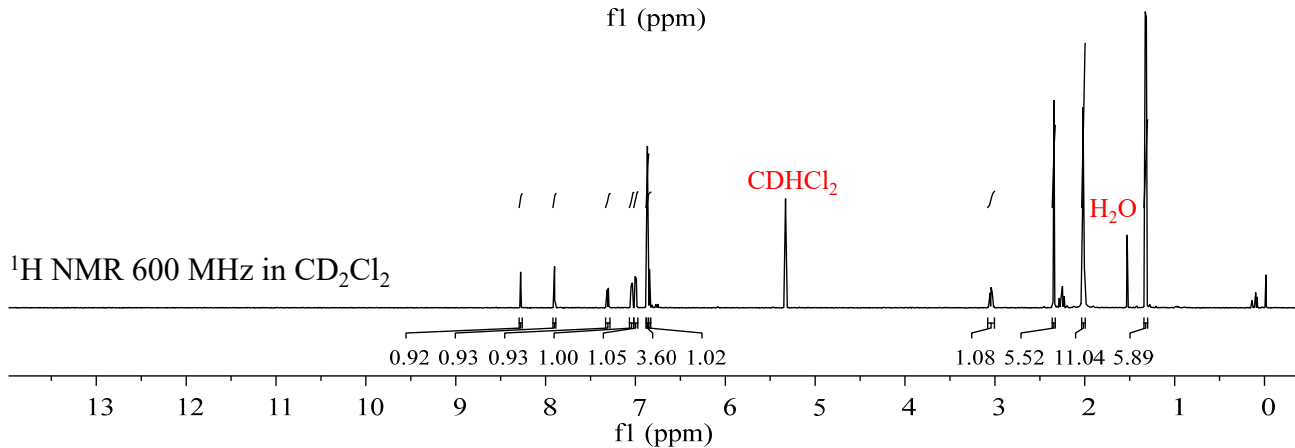

$^{13}\text{C}$  NMR 151 MHz in  $\text{CD}_2\text{Cl}_2$

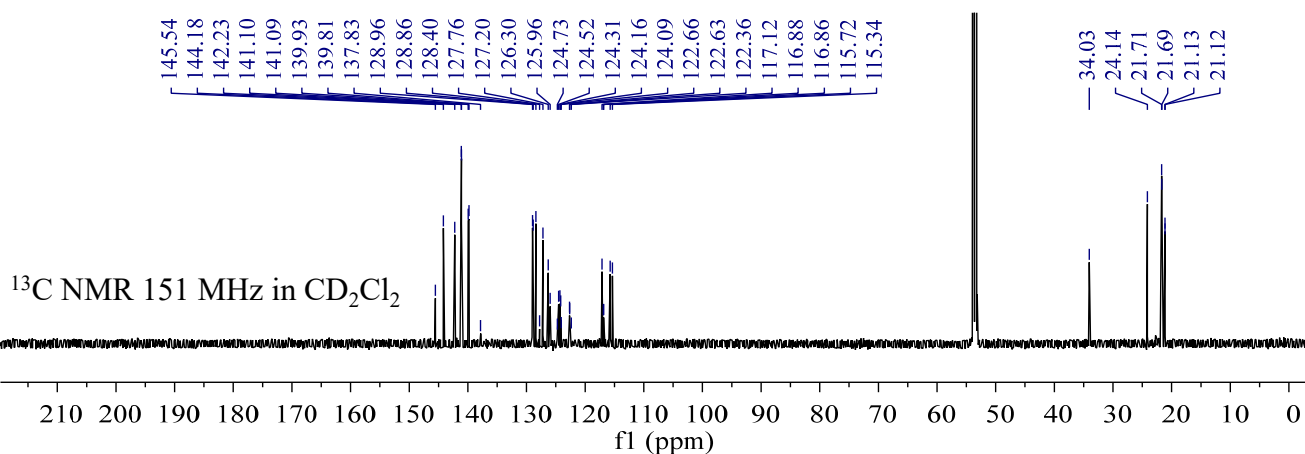

$^{11}\text{B}$  NMR 192 MHz in  $\text{CD}_2\text{Cl}_2$

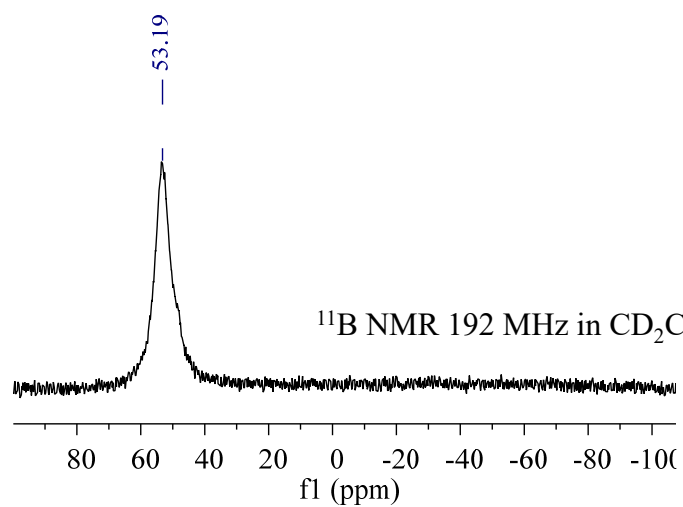

$^{19}\text{F}$  NMR 376 MHz in  $\text{CDCl}_3$

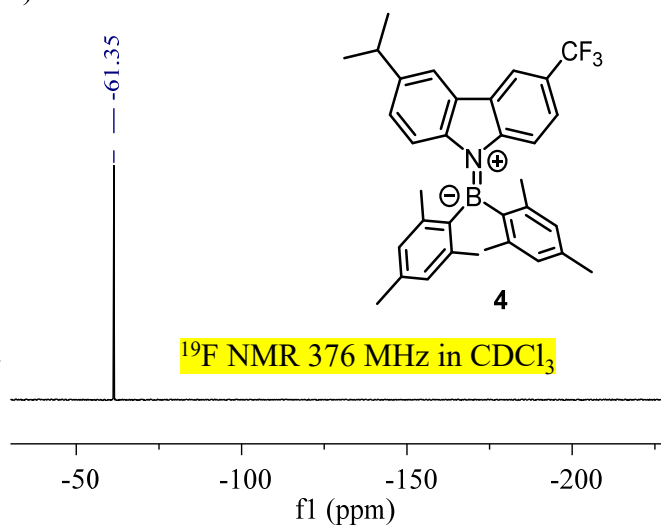



Zoom aromatic region

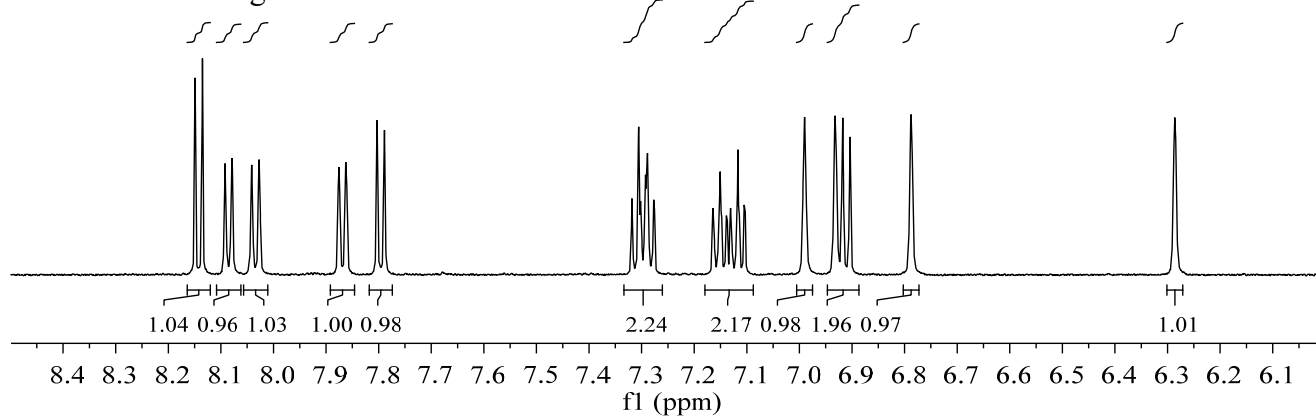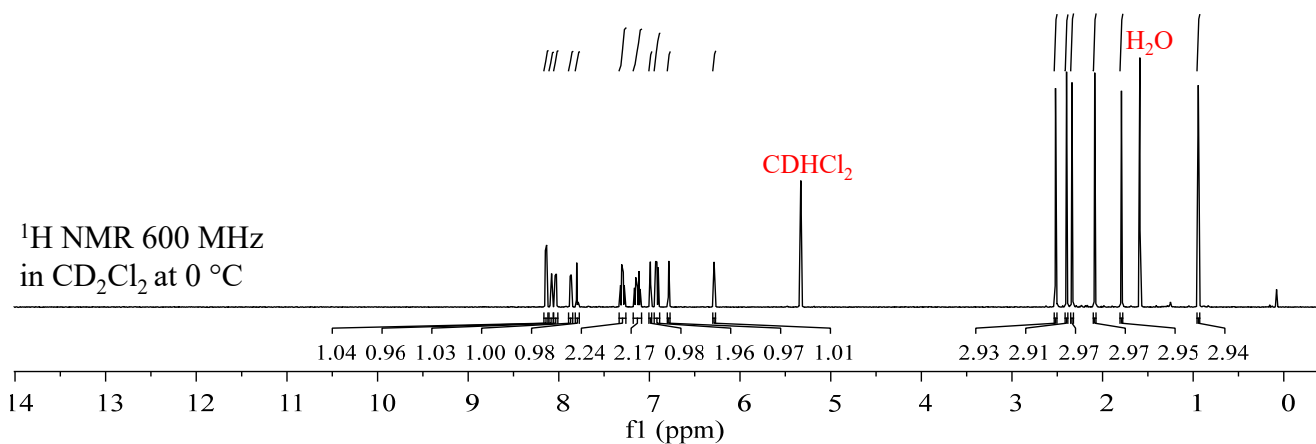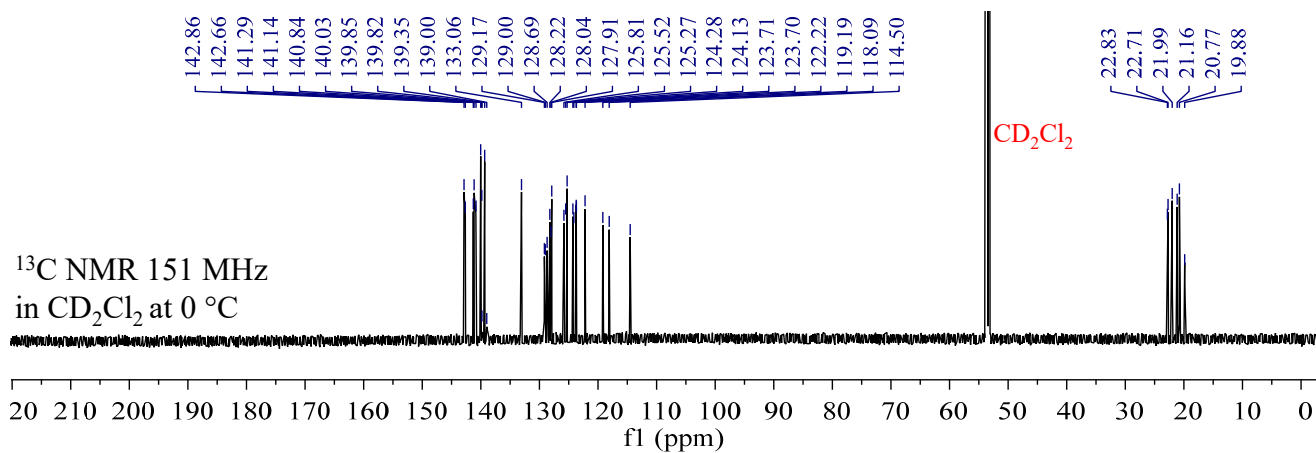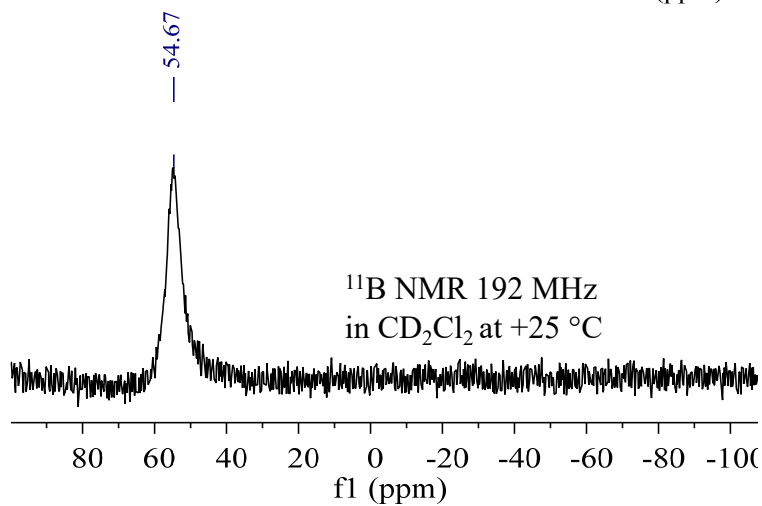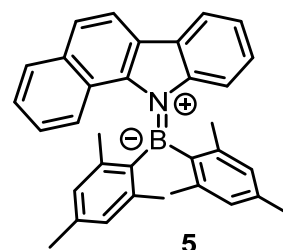

### Zoom aromatic region

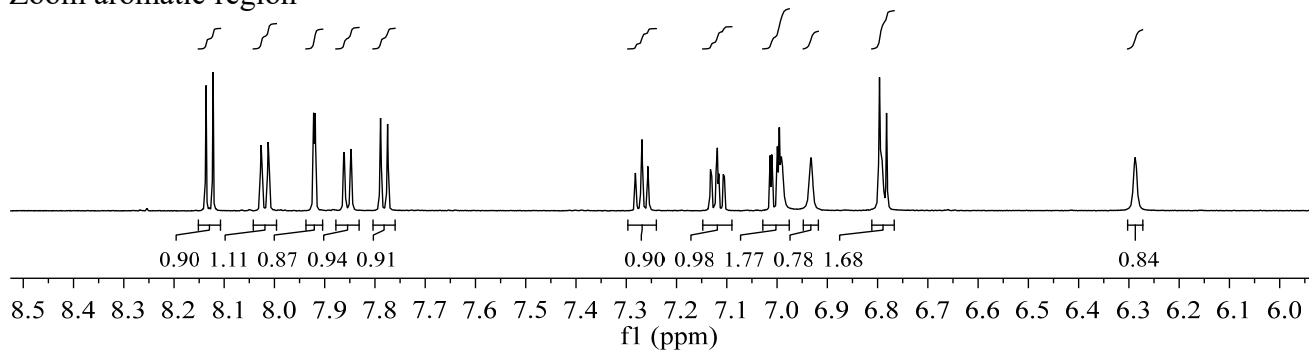

### Zoom aliphatic region

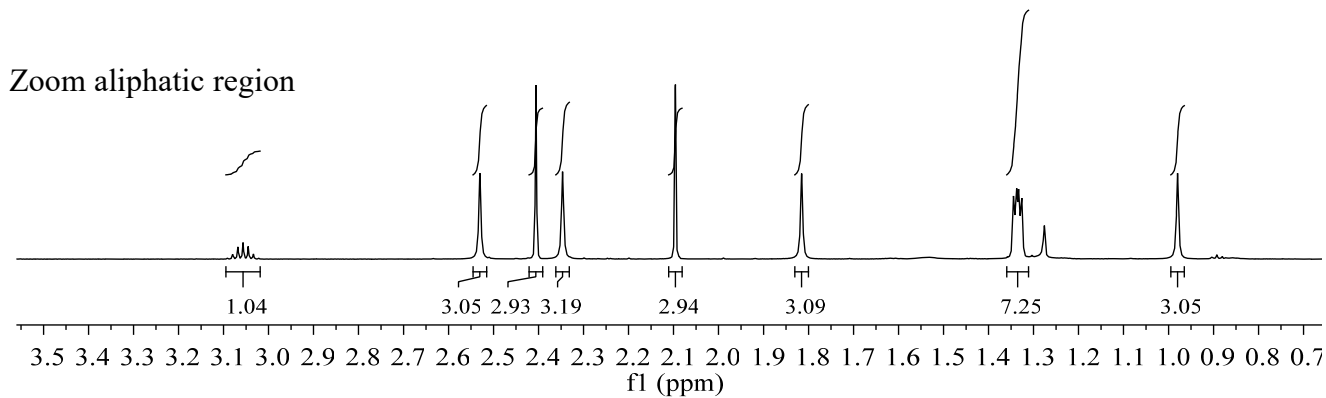

### <sup>1</sup>H NMR 600 MHz in CD<sub>2</sub>Cl<sub>2</sub>

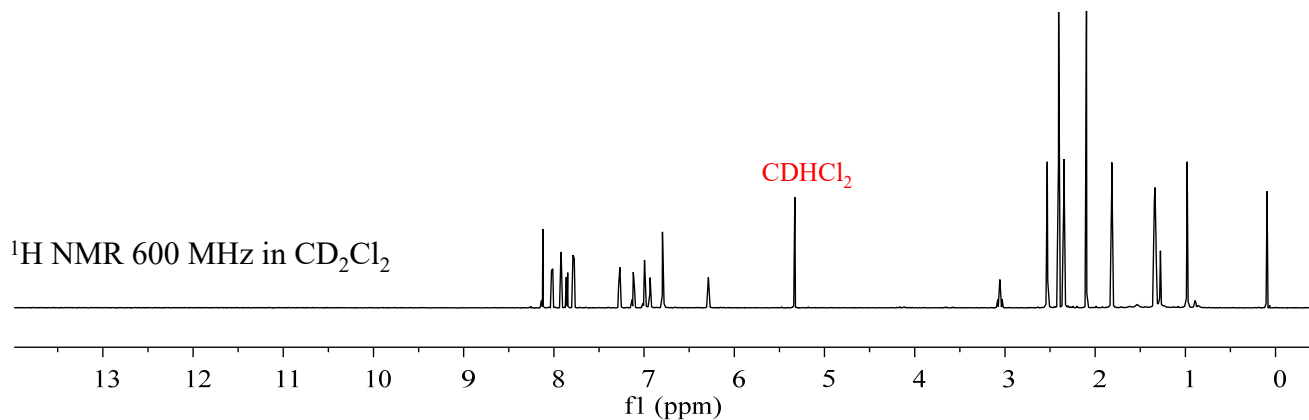

### <sup>13</sup>C NMR 151 MHz in CD<sub>2</sub>Cl<sub>2</sub>

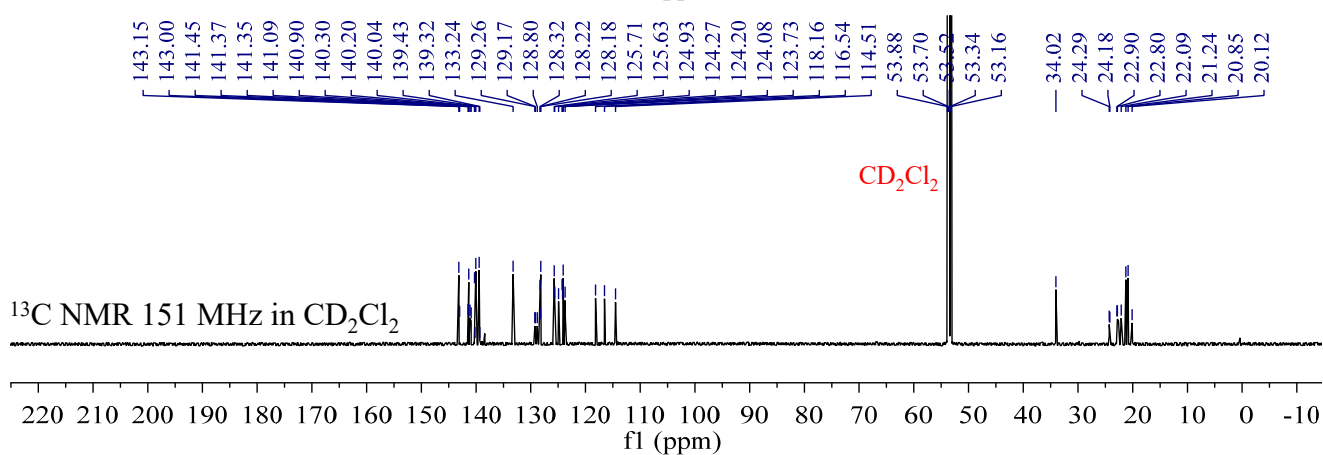

### <sup>11</sup>B NMR 192 MHz in CD<sub>2</sub>Cl<sub>2</sub>

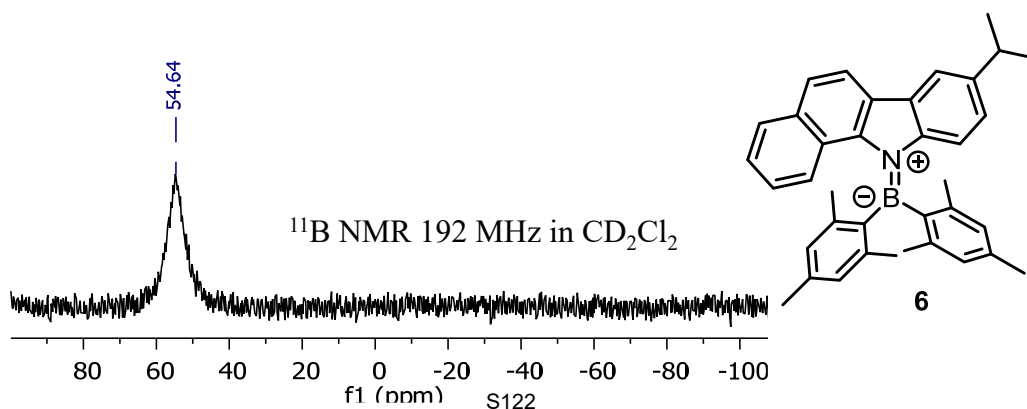

Zoom aromatic region

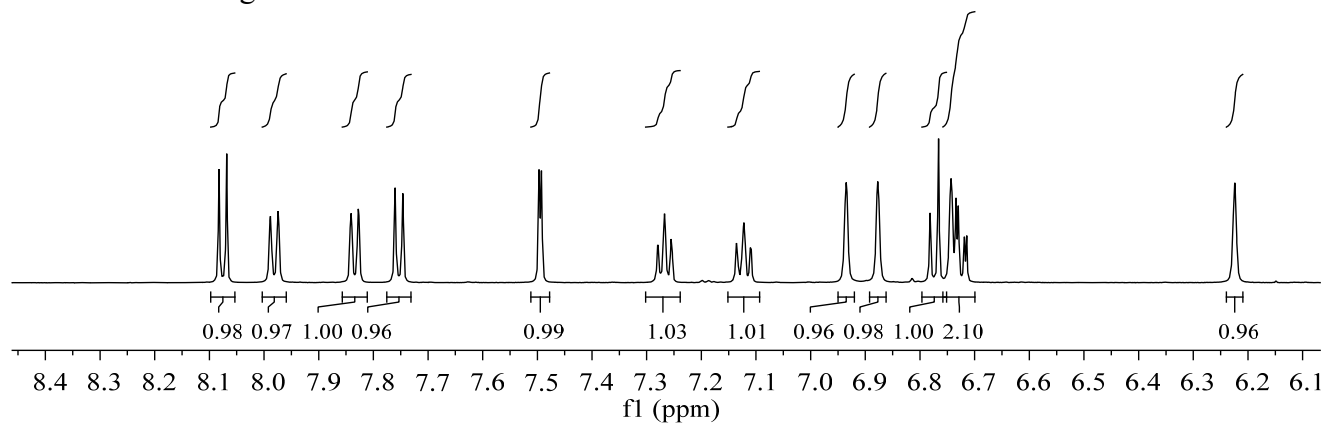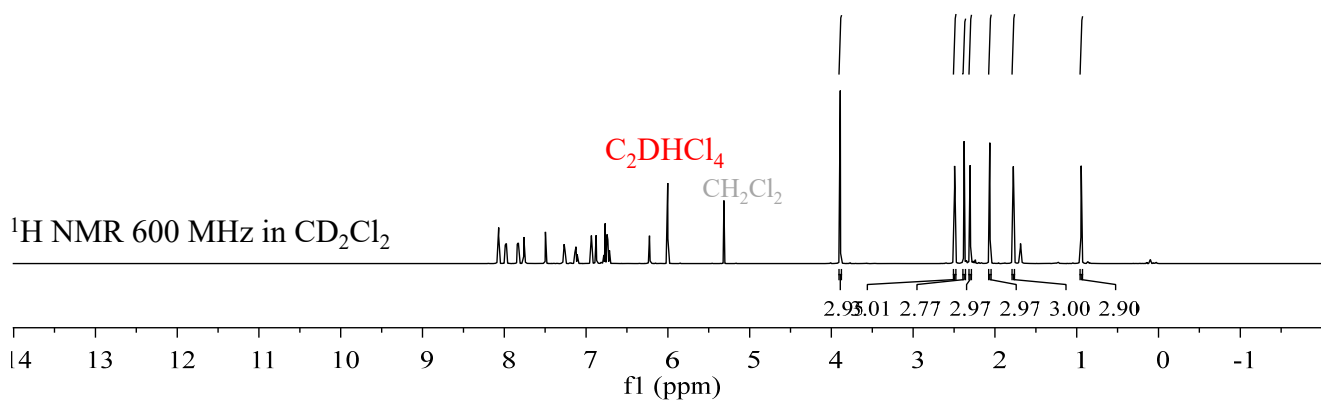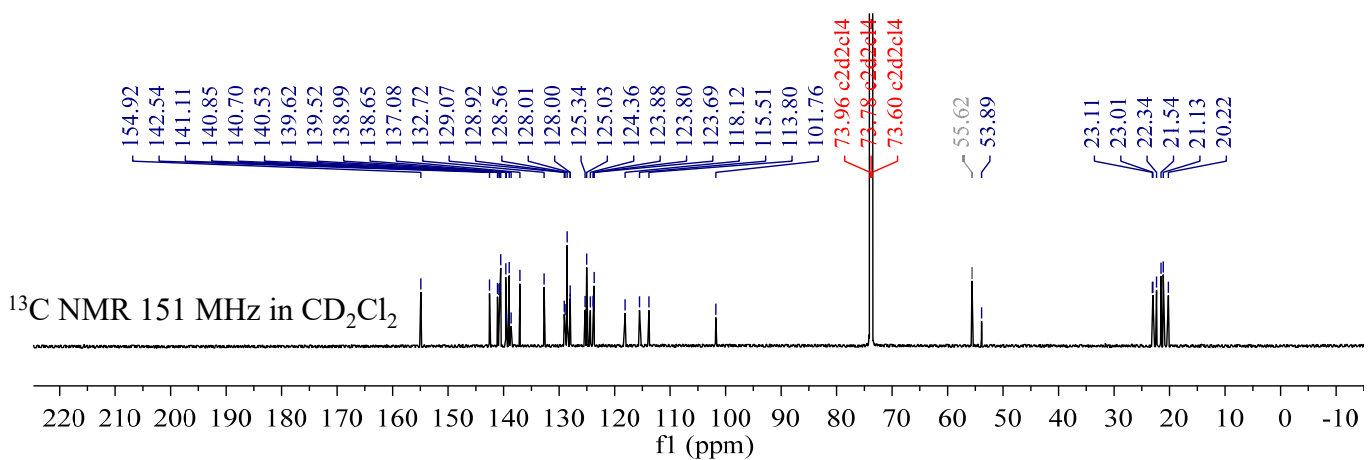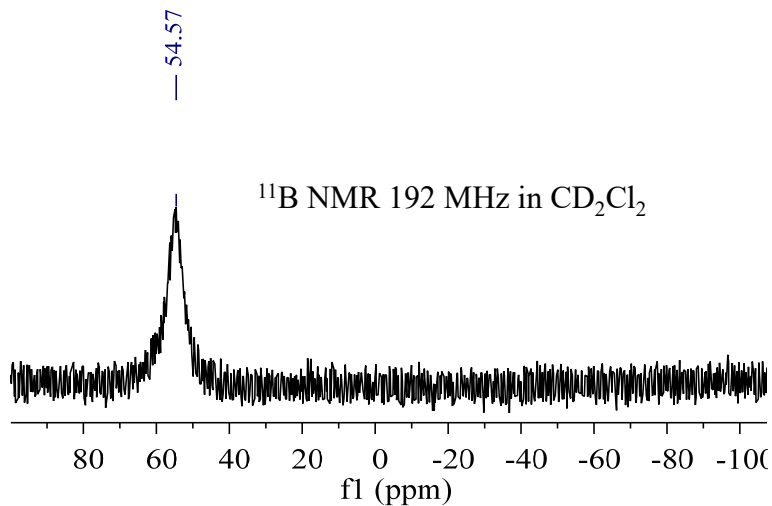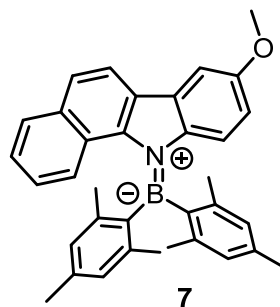

Zoom aromatic region

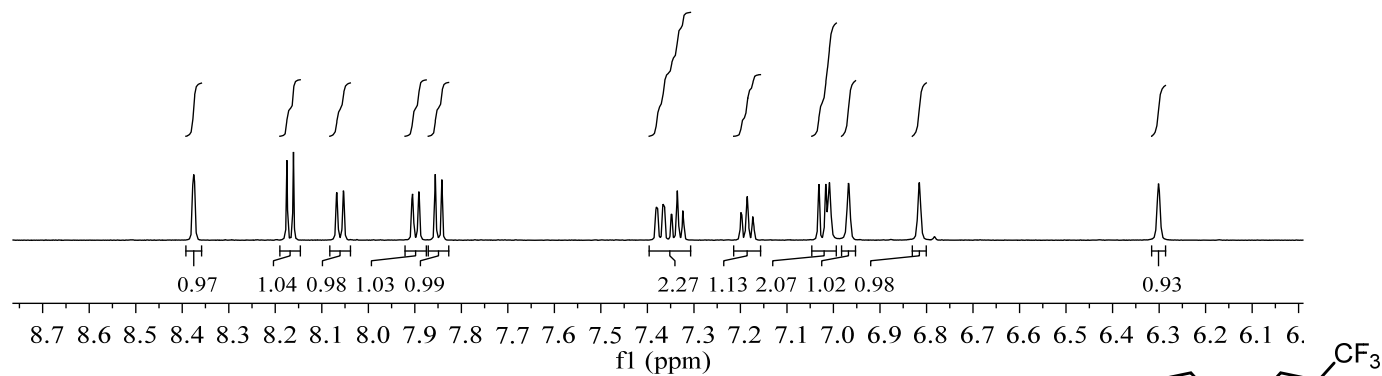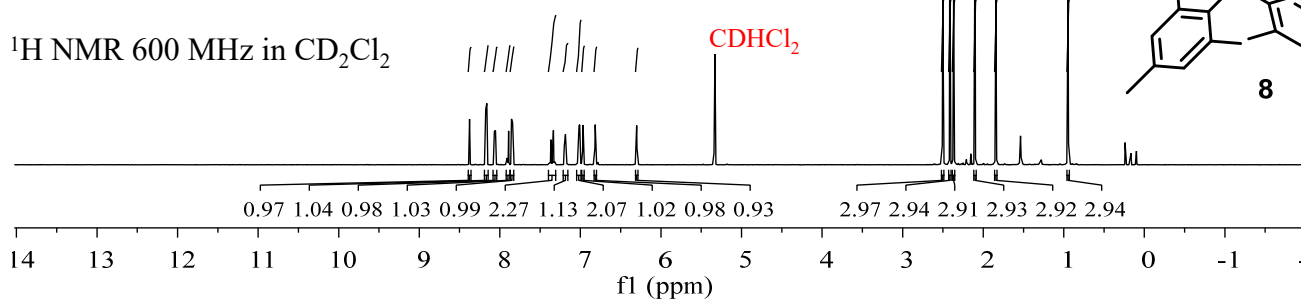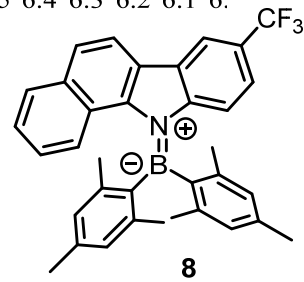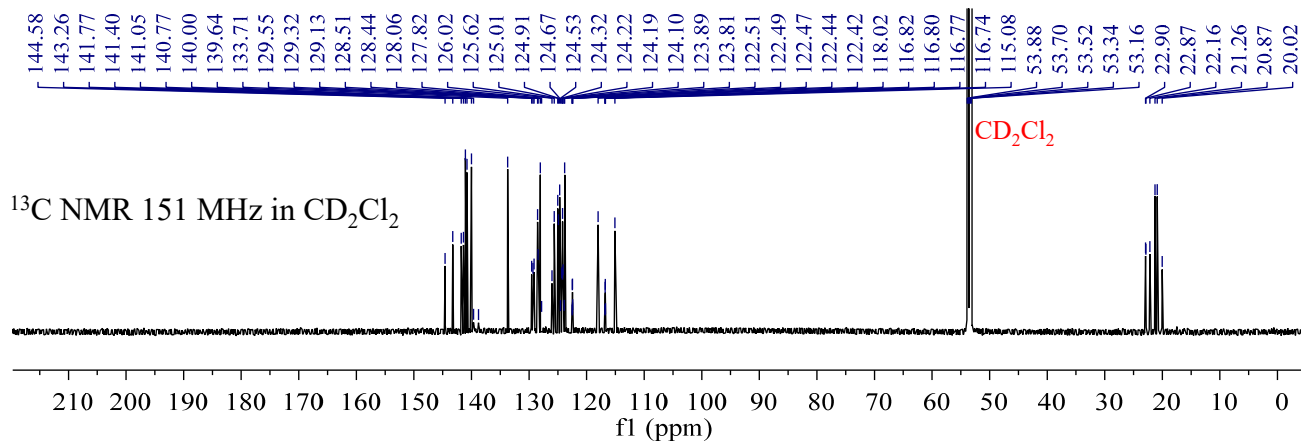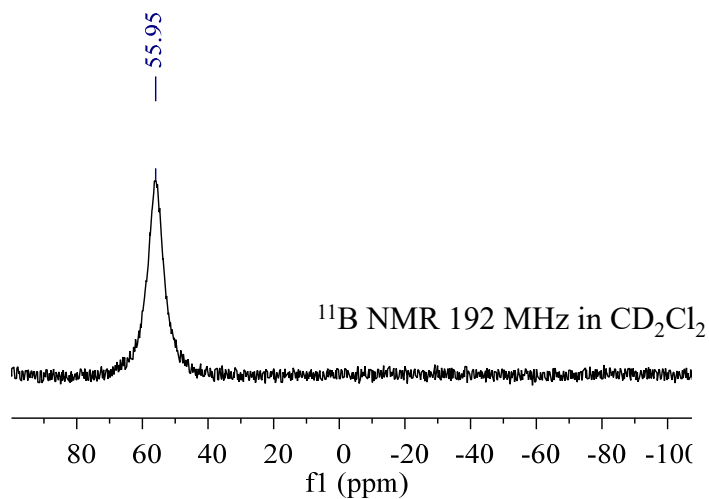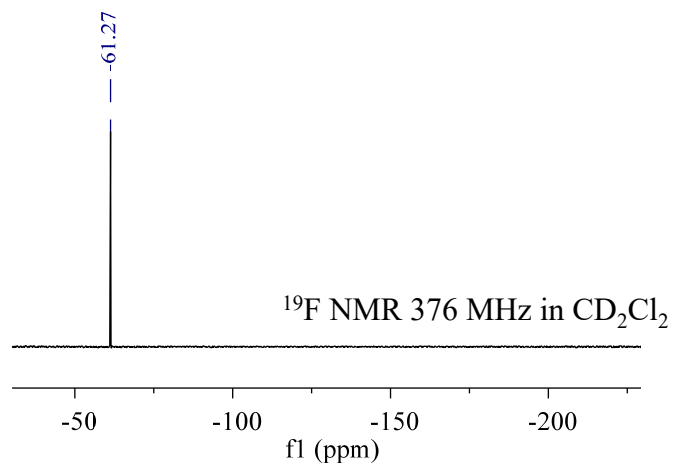

Compound 1 GS1

Method: b3lyp/6-311g(d,p)

SCF Done: E(RB3LYP) = -1241.25757084 A.U. after 1 cycles

Lowest frequency = 27.6254

Zero-point correction= 0.515838  
(Hartree/Particle)  
Thermal correction to Energy= 0.546101  
Thermal correction to Enthalpy= 0.547045  
Thermal correction to Gibbs Free Energy= 0.453089  
Sum of electronic and zero-point Energies= -1240.741733  
Sum of electronic and thermal Energies= -1240.711470  
Sum of electronic and thermal Enthalpies= -1240.710526  
Sum of electronic and thermal Free Energies= -1240.804482

Standard orientation:

| Center<br>Number | Atomic<br>Number | Atomic<br>Type | Coordinates (Angstroms) |           |           |
|------------------|------------------|----------------|-------------------------|-----------|-----------|
|                  |                  |                | X                       | Y         | Z         |
| 1                | 5                | 0              | 0.000056                | -0.346726 | 0.000005  |
| 2                | 6                | 0              | -0.929597               | -2.390363 | -2.084873 |
| 3                | 1                | 0              | -0.793081               | -1.492298 | -2.694729 |
| 4                | 1                | 0              | 0.065465                | -2.761524 | -1.831419 |
| 5                | 1                | 0              | -1.419597               | -3.137539 | -2.712131 |
| 6                | 6                | 0              | 0.930319                | -2.390014 | 2.084950  |
| 7                | 1                | 0              | 1.420503                | -3.137082 | 2.712192  |
| 8                | 1                | 0              | 0.793642                | -1.491973 | 2.694805  |
| 9                | 1                | 0              | -0.064675               | -2.761386 | 1.831540  |
| 10               | 6                | 0              | 1.926674                | 0.117525  | -2.287144 |
| 11               | 1                | 0              | 0.868748                | 0.165053  | -2.549784 |
| 12               | 1                | 0              | 2.219767                | 1.119525  | -1.958873 |
| 13               | 1                | 0              | 2.485039                | -0.105437 | -3.198781 |
| 14               | 6                | 0              | 5.038902                | -3.430241 | -0.599630 |
| 15               | 1                | 0              | 5.488241                | -3.690041 | 0.361898  |
| 16               | 1                | 0              | 4.827068                | -4.368475 | -1.124541 |
| 17               | 1                | 0              | 5.782715                | -2.887793 | -1.187764 |
| 18               | 6                | 0              | 3.780268                | -2.617677 | -0.417902 |
| 19               | 6                | 0              | 2.947837                | -2.815602 | 0.683281  |
| 20               | 1                | 0              | 3.231299                | -3.545893 | 1.435845  |
| 21               | 6                | 0              | 1.756007                | -2.107704 | 0.847581  |
| 22               | 6                | 0              | 1.372322                | -1.131222 | -0.105476 |
| 23               | 6                | 0              | 2.224247                | -0.915098 | -1.218439 |
| 24               | 6                | 0              | 3.394807                | -1.664141 | -1.357795 |
| 25               | 1                | 0              | 4.025564                | -1.492018 | -2.225446 |
| 26               | 6                | 0              | -2.223988               | -0.915687 | 1.218439  |
| 27               | 6                | 0              | -3.394359               | -1.665038 | 1.357791  |
| 28               | 1                | 0              | -4.025170               | -1.493065 | 2.225430  |
| 29               | 6                | 0              | -3.779552               | -2.618688 | 0.417913  |
| 30               | 6                | 0              | -2.947040               | -2.816426 | -0.683248 |
| 31               | 1                | 0              | -3.230293               | -3.546819 | -1.435794 |
| 32               | 6                | 0              | -1.755395               | -2.108226 | -0.847539 |
| 33               | 6                | 0              | -1.371992               | -1.131604 | 0.105497  |
| 34               | 6                | 0              | -1.926710               | 0.117026  | 2.287141  |
| 35               | 1                | 0              | -2.220013               | 1.118953  | 1.958840  |
| 36               | 1                | 0              | -2.485073               | -0.106050 | 3.198752  |
| 37               | 1                | 0              | -0.868809               | 0.164796  | 2.549840  |
| 38               | 6                | 0              | -5.037986               | -3.431573 | 0.599603  |
| 39               | 1                | 0              | -5.487559               | -3.690964 | -0.361930 |

|    |   |   |           |           |           |
|----|---|---|-----------|-----------|-----------|
| 40 | 1 | 0 | -4.825836 | -4.370038 | 1.123969  |
| 41 | 1 | 0 | -5.781726 | -2.889551 | 1.188220  |
| 42 | 7 | 0 | -0.000153 | 1.103615  | -0.000003 |
| 43 | 6 | 0 | -1.044553 | 1.959517  | -0.453543 |
| 44 | 6 | 0 | 1.044009  | 1.959820  | 0.453519  |
| 45 | 6 | 0 | -2.264702 | 1.639140  | -1.052680 |
| 46 | 6 | 0 | -0.661425 | 3.308494  | -0.294513 |
| 47 | 6 | 0 | 2.264256  | 1.639795  | 1.052647  |
| 48 | 6 | 0 | 0.660487  | 3.308685  | 0.294497  |
| 49 | 6 | 0 | -3.099148 | 2.680464  | -1.449265 |
| 50 | 1 | 0 | -2.567882 | 0.614117  | -1.203699 |
| 51 | 6 | 0 | -1.509351 | 4.340929  | -0.701825 |
| 52 | 6 | 0 | 3.098402  | 2.681360  | 1.449229  |
| 53 | 1 | 0 | 2.567731  | 0.614860  | 1.203663  |
| 54 | 6 | 0 | 1.508116  | 4.341366  | 0.701808  |
| 55 | 6 | 0 | -2.733186 | 4.020794  | -1.274156 |
| 56 | 1 | 0 | -4.052100 | 2.441837  | -1.907887 |
| 57 | 1 | 0 | -1.211897 | 5.376269  | -0.577942 |
| 58 | 6 | 0 | 2.732048  | 4.021584  | 1.274128  |
| 59 | 1 | 0 | 4.051426  | 2.443009  | 1.907845  |
| 60 | 1 | 0 | 1.210362  | 5.376619  | 0.577929  |
| 61 | 1 | 0 | -3.404694 | 4.808542  | -1.595727 |
| 62 | 1 | 0 | 3.403329  | 4.809526  | 1.595698  |

-----

Compound 1 1RF-C-TS

Method: b3lyp/6-311g(d,p)

SCF Done: E(RB3LYP) = -1241.18493043 A.U. after 1 cycles

Lowest frequency = -44.2678

Zero-point correction= 0.515645  
(Hartree/Particle)  
Thermal correction to Energy= 0.544452  
Thermal correction to Enthalpy= 0.545397  
Thermal correction to Gibbs Free Energy= 0.456369  
Sum of electronic and zero-point Energies= -1240.669285  
Sum of electronic and thermal Energies= -1240.640478  
Sum of electronic and thermal Enthalpies= -1240.639534  
Sum of electronic and thermal Free Energies= -1240.728561

Standard orientation:

| Center<br>Number | Atomic<br>Number | Atomic<br>Type | Coordinates (Angstroms) |           |           |
|------------------|------------------|----------------|-------------------------|-----------|-----------|
|                  |                  |                | X                       | Y         | Z         |
| 1                | 6                | 0              | 2.466840                | -2.109991 | -0.243714 |
| 2                | 6                | 0              | 1.317798                | -2.595524 | -0.980619 |
| 3                | 6                | 0              | 0.174606                | -1.989754 | -0.409128 |
| 4                | 7                | 0              | 0.586823                | -0.928252 | 0.489609  |
| 5                | 6                | 0              | 1.968879                | -1.209491 | 0.722021  |
| 6                | 6                | 0              | 2.722439                | -0.953110 | 1.860439  |
| 7                | 6                | 0              | 4.036591                | -1.415889 | 1.922517  |
| 8                | 6                | 0              | 3.788035                | -2.553253 | -0.192764 |
| 9                | 6                | 0              | 1.199449                | -3.615942 | -1.923606 |
| 10               | 6                | 0              | -1.187609               | -3.563823 | -1.606357 |
| 11               | 6                | 0              | -1.083107               | -2.528173 | -0.677172 |
| 12               | 1                | 0              | 2.287947                | -0.449319 | 2.708695  |
| 13               | 1                | 0              | 4.628109                | -1.211695 | 2.807952  |
| 14               | 1                | 0              | 4.168192                | -3.237100 | -0.943346 |

|    |   |   |           |           |           |
|----|---|---|-----------|-----------|-----------|
| 15 | 1 | 0 | 2.086322  | -4.061968 | -2.359904 |
| 16 | 1 | 0 | -2.167271 | -3.982529 | -1.808127 |
| 17 | 1 | 0 | -1.966204 | -2.183040 | -0.167702 |
| 18 | 5 | 0 | -0.151032 | 0.361653  | 0.535429  |
| 19 | 6 | 0 | -1.732761 | 0.172610  | 0.470951  |
| 20 | 6 | 0 | -2.495942 | 0.157759  | -0.713671 |
| 21 | 6 | 0 | -2.401314 | -0.017792 | 1.703121  |
| 22 | 6 | 0 | -3.880841 | -0.024963 | -0.647890 |
| 23 | 6 | 0 | -3.784254 | -0.197111 | 1.731576  |
| 24 | 6 | 0 | -4.548080 | -0.200306 | 0.561897  |
| 25 | 1 | 0 | -4.452185 | -0.033576 | -1.572659 |
| 26 | 1 | 0 | -4.278029 | -0.337886 | 2.689319  |
| 27 | 6 | 0 | 0.475797  | 1.834164  | 0.391290  |
| 28 | 6 | 0 | 1.840591  | 2.248797  | 0.563438  |
| 29 | 6 | 0 | -0.310630 | 2.784282  | -0.352277 |
| 30 | 6 | 0 | 2.425783  | 3.166690  | -0.302861 |
| 31 | 6 | 0 | 0.312820  | 3.701074  | -1.208145 |
| 32 | 6 | 0 | 1.692839  | 3.838240  | -1.281682 |
| 33 | 1 | 0 | 3.472839  | 3.419059  | -0.157928 |
| 34 | 1 | 0 | -0.317296 | 4.359893  | -1.799122 |
| 35 | 6 | 0 | -1.630740 | -0.025979 | 3.007061  |
| 36 | 1 | 0 | -0.908871 | -0.848059 | 3.038761  |
| 37 | 1 | 0 | -1.069179 | 0.903970  | 3.147023  |
| 38 | 1 | 0 | -2.302035 | -0.138783 | 3.860704  |
| 39 | 6 | 0 | -1.870835 | 0.292610  | -2.087201 |
| 40 | 1 | 0 | -0.843629 | 0.655308  | -2.047979 |
| 41 | 1 | 0 | -1.856565 | -0.673369 | -2.600262 |
| 42 | 1 | 0 | -2.445103 | 0.982613  | -2.712572 |
| 43 | 6 | 0 | -6.048052 | -0.364995 | 0.615872  |
| 44 | 1 | 0 | -6.451152 | -0.665747 | -0.353640 |
| 45 | 1 | 0 | -6.340544 | -1.117790 | 1.352809  |
| 46 | 1 | 0 | -6.537499 | 0.573287  | 0.899416  |
| 47 | 6 | 0 | -1.800909 | 3.030178  | -0.173408 |
| 48 | 1 | 0 | -2.402293 | 2.726277  | -1.031077 |
| 49 | 1 | 0 | -2.211303 | 2.554720  | 0.710854  |
| 50 | 1 | 0 | -1.930039 | 4.111243  | -0.060217 |
| 51 | 6 | 0 | 2.638003  | 1.973827  | 1.821957  |
| 52 | 1 | 0 | 2.045355  | 1.468143  | 2.578328  |
| 53 | 1 | 0 | 3.557800  | 1.416603  | 1.648636  |
| 54 | 1 | 0 | 2.916586  | 2.944957  | 2.244265  |
| 55 | 6 | 0 | 2.353178  | 4.750185  | -2.281038 |
| 56 | 1 | 0 | 1.666607  | 5.522728  | -2.634674 |
| 57 | 1 | 0 | 3.233844  | 5.239689  | -1.857440 |
| 58 | 1 | 0 | 2.687616  | 4.182209  | -3.156503 |
| 59 | 6 | 0 | 4.584699  | -2.170696 | 0.881680  |
| 60 | 1 | 0 | 5.609220  | -2.518363 | 0.948481  |
| 61 | 6 | 0 | -0.065741 | -4.084858 | -2.255342 |
| 62 | 1 | 0 | -0.179023 | -4.884567 | -2.978161 |

-----

Compound 1 1RF-N-TS

Method: b3lyp/6-311g(d,p)

SCF Done: E(RB3LYP) = -1241.15830093 A.U. after 1 cycles

Lowest frequency = -68.8685

Zero-point correction= 0.516310  
(Hartree/Particle)  
Thermal correction to Energy= 0.544409  
Thermal correction to Enthalpy= 0.545353

Thermal correction to Gibbs Free Energy= 0.459050  
 Sum of electronic and zero-point Energies= -1240.641991  
 Sum of electronic and thermal Energies= -1240.613892  
 Sum of electronic and thermal Enthalpies= -1240.612948  
 Sum of electronic and thermal Free Energies= -1240.699251

Standard orientation:

| Center<br>Number | Atomic<br>Number | Atomic<br>Type | Coordinates (Angstroms) |           |           |
|------------------|------------------|----------------|-------------------------|-----------|-----------|
|                  |                  |                | X                       | Y         | Z         |
| 1                | 5                | 0              | 0.000001                | 0.820932  | 0.000000  |
| 2                | 6                | 0              | -5.729280               | 1.740767  | -0.122326 |
| 3                | 1                | 0              | -6.309329               | 1.141662  | -0.828287 |
| 4                | 1                | 0              | -5.950304               | 1.363031  | 0.882421  |
| 5                | 1                | 0              | -6.086161               | 2.772276  | -0.168968 |
| 6                | 6                | 0              | -4.253719               | 1.650944  | -0.403804 |
| 7                | 6                | 0              | -3.683660               | 0.520632  | -0.985066 |
| 8                | 1                | 0              | -4.330442               | -0.266277 | -1.361723 |
| 9                | 6                | 0              | -1.392155               | 1.357665  | -0.599977 |
| 10               | 6                | 0              | -3.398405               | 2.731789  | -0.205189 |
| 11               | 1                | 0              | -3.821112               | 3.709107  | 0.012216  |
| 12               | 6                | 0              | 3.398407                | 2.731787  | 0.205189  |
| 13               | 1                | 0              | 3.821114                | 3.709105  | -0.012216 |
| 14               | 6                | 0              | 4.253721                | 1.650942  | 0.403804  |
| 15               | 6                | 0              | 3.683661                | 0.520630  | 0.985066  |
| 16               | 1                | 0              | 4.330443                | -0.266279 | 1.361722  |
| 17               | 6                | 0              | 1.392156                | 1.357664  | 0.599977  |
| 18               | 6                | 0              | 5.729282                | 1.740764  | 0.122325  |
| 19               | 1                | 0              | 6.309332                | 1.141670  | 0.828295  |
| 20               | 1                | 0              | 5.950308                | 1.363015  | -0.882416 |
| 21               | 1                | 0              | 6.086161                | 2.772275  | 0.168954  |
| 22               | 6                | 0              | 2.020217                | 2.635146  | 0.396993  |
| 23               | 6                | 0              | -2.306034               | 0.374695  | -1.138051 |
| 24               | 6                | 0              | -1.890181               | -0.777568 | -2.033423 |
| 25               | 1                | 0              | -0.888977               | -0.658832 | -2.437668 |
| 26               | 1                | 0              | -1.952870               | -1.752242 | -1.544739 |
| 27               | 1                | 0              | -2.582681               | -0.800141 | -2.880296 |
| 28               | 6                | 0              | 1.335049                | 3.955631  | 0.662237  |
| 29               | 1                | 0              | 1.915594                | 4.458750  | 1.442096  |
| 30               | 1                | 0              | 1.308922                | 4.632731  | -0.194063 |
| 31               | 1                | 0              | 0.335421                | 3.820802  | 1.055553  |
| 32               | 6                | 0              | 2.306036                | 0.374694  | 1.138050  |
| 33               | 6                | 0              | 1.890182                | -0.777569 | 2.033422  |
| 34               | 1                | 0              | 0.888978                | -0.658833 | 2.437667  |
| 35               | 1                | 0              | 1.952871                | -1.752244 | 1.544737  |
| 36               | 1                | 0              | 2.582682                | -0.800143 | 2.880295  |
| 37               | 6                | 0              | -2.020215               | 2.635147  | -0.396993 |
| 38               | 6                | 0              | -1.335046               | 3.955632  | -0.662237 |
| 39               | 1                | 0              | -1.308919               | 4.632732  | 0.194063  |
| 40               | 1                | 0              | -0.335418               | 3.820803  | -1.055553 |
| 41               | 1                | 0              | -1.915592               | 4.458752  | -1.442096 |
| 42               | 7                | 0              | 0.000000                | -0.702440 | 0.000000  |
| 43               | 6                | 0              | 0.838490                | -1.533935 | -0.748334 |
| 44               | 6                | 0              | -0.838491               | -1.533934 | 0.748334  |
| 45               | 6                | 0              | 0.533822                | -2.893913 | -0.487261 |
| 46               | 6                | 0              | 1.816036                | -1.186947 | -1.686693 |
| 47               | 6                | 0              | -0.533825               | -2.893912 | 0.487261  |
| 48               | 6                | 0              | 1.229282                | -3.906796 | -1.155989 |
| 49               | 6                | 0              | 2.493993                | -2.210886 | -2.337493 |



|    |   |   |           |           |           |
|----|---|---|-----------|-----------|-----------|
| 50 | 1 | 0 | 2.047154  | -0.150638 | -1.899663 |
| 51 | 6 | 0 | -1.229286 | -3.906794 | 1.155990  |
| 52 | 1 | 0 | 1.001852  | -4.949344 | -0.961117 |
| 53 | 1 | 0 | 3.257555  | -1.958889 | -3.065128 |
| 54 | 6 | 0 | -2.209662 | -3.560708 | 2.076042  |
| 55 | 1 | 0 | -1.001858 | -4.949342 | 0.961118  |
| 56 | 1 | 0 | -2.755577 | -4.334879 | 2.602870  |
| 57 | 6 | 0 | 2.209658  | -3.560711 | -2.076041 |
| 58 | 1 | 0 | 2.755572  | -4.334883 | -2.602869 |
| 59 | 6 | 0 | -2.493995 | -2.210882 | 2.337494  |
| 60 | 1 | 0 | -3.257557 | -1.958884 | 3.065128  |
| 61 | 6 | 0 | -1.816037 | -1.186944 | 1.686693  |
| 62 | 1 | 0 | -2.047153 | -0.150635 | 1.899663  |

-----

Compound 1 2RF-CC-TS

Method: b3lyp/6-311g(d,p)

SCF Done: E(RB3LYP) = -1241.23979905 A.U. after 1 cycles

Lowest frequency = -60.0680

Zero-point correction= 0.516215  
(Hartree/Particle)  
Thermal correction to Energy= 0.545376  
Thermal correction to Enthalpy= 0.546320  
Thermal correction to Gibbs Free Energy= 0.455472  
Sum of electronic and zero-point Energies= -1240.723584  
Sum of electronic and thermal Energies= -1240.694423  
Sum of electronic and thermal Enthalpies= -1240.693479  
Sum of electronic and thermal Free Energies= -1240.784327

Standard orientation:

| Center<br>Number | Atomic<br>Number | Atomic<br>Type | Coordinates (Angstroms) |           |           |
|------------------|------------------|----------------|-------------------------|-----------|-----------|
|                  |                  |                | X                       | Y         | Z         |
| 1                | 5                | 0              | 0.232261                | -0.000826 | 0.000015  |
| 2                | 6                | 0              | 3.840116                | 4.752182  | 0.000356  |
| 3                | 1                | 0              | 4.865484                | 4.365919  | 0.000440  |
| 4                | 1                | 0              | 3.730346                | 5.383860  | -0.884542 |
| 5                | 1                | 0              | 3.730197                | 5.383848  | 0.885245  |
| 6                | 6                | 0              | 2.839925                | 3.622759  | 0.000263  |
| 7                | 6                | 0              | 2.346138                | 3.087960  | -1.185620 |
| 8                | 1                | 0              | 2.636239                | 3.538586  | -2.131189 |
| 9                | 6                | 0              | 1.050692                | 1.386883  | 0.000096  |
| 10               | 6                | 0              | 2.345945                | 3.087936  | 1.186056  |
| 11               | 1                | 0              | 2.635892                | 3.538544  | 2.131681  |
| 12               | 6                | 0              | 2.531891                | -2.947206 | 1.186374  |
| 13               | 1                | 0              | 2.853092                | -3.377073 | 2.131750  |
| 14               | 6                | 0              | 3.070244                | -3.437286 | 0.000210  |
| 15               | 6                | 0              | 2.532084                | -2.947182 | -1.186031 |
| 16               | 1                | 0              | 2.853439                | -3.377029 | -2.131364 |
| 17               | 6                | 0              | 1.115354                | -1.347083 | 0.000072  |
| 18               | 6                | 0              | 4.161820                | -4.478658 | 0.000289  |
| 19               | 1                | 0              | 4.105710                | -5.117346 | -0.884617 |
| 20               | 1                | 0              | 5.150998                | -4.007367 | 0.000376  |
| 21               | 1                | 0              | 4.105564                | -5.117365 | 0.885171  |
| 22               | 7                | 0              | -1.206216               | -0.032335 | -0.000100 |
| 23               | 6                | 0              | -2.048008               | -1.196839 | -0.000177 |
| 24               | 6                | 0              | -2.101258               | 1.091980  | -0.000157 |

|    |   |   |           |           |           |
|----|---|---|-----------|-----------|-----------|
| 25 | 6 | 0 | -3.402174 | -0.806930 | -0.000275 |
| 26 | 6 | 0 | -1.713004 | -2.551815 | -0.000167 |
| 27 | 6 | 0 | -3.435855 | 0.639219  | -0.000263 |
| 28 | 6 | 0 | -4.423068 | -1.758651 | -0.000363 |
| 29 | 6 | 0 | -2.742668 | -3.490585 | -0.000256 |
| 30 | 1 | 0 | -0.687417 | -2.881567 | -0.000094 |
| 31 | 6 | 0 | -4.500123 | 1.542123  | -0.000335 |
| 32 | 6 | 0 | -4.087046 | -3.105838 | -0.000353 |
| 33 | 1 | 0 | -5.461786 | -1.447888 | -0.000439 |
| 34 | 1 | 0 | -2.486799 | -4.544089 | -0.000249 |
| 35 | 1 | 0 | -5.523170 | 1.183123  | -0.000416 |
| 36 | 1 | 0 | -4.865084 | -3.860515 | -0.000421 |
| 37 | 6 | 0 | -2.902499 | 3.350666  | -0.000196 |
| 38 | 1 | 0 | -2.696094 | 4.414954  | -0.000170 |
| 39 | 6 | 0 | -1.829905 | 2.461214  | -0.000123 |
| 40 | 1 | 0 | -0.821108 | 2.838970  | -0.000043 |
| 41 | 6 | 0 | 1.561739  | -1.942107 | 1.206721  |
| 42 | 6 | 0 | 1.459266  | 2.008497  | -1.206653 |
| 43 | 6 | 0 | 0.901949  | 1.631009  | -2.563310 |
| 44 | 1 | 0 | 1.601123  | 1.021911  | -3.140683 |
| 45 | 1 | 0 | -0.040507 | 1.089666  | -2.491243 |
| 46 | 1 | 0 | 0.708599  | 2.535778  | -3.145309 |
| 47 | 6 | 0 | 0.946027  | -1.637501 | 2.557159  |
| 48 | 1 | 0 | 0.663462  | -2.574418 | 3.045782  |
| 49 | 1 | 0 | 1.644404  | -1.127349 | 3.225277  |
| 50 | 1 | 0 | 0.043664  | -1.034252 | 2.481864  |
| 51 | 6 | 0 | 1.561936  | -1.942083 | -1.206515 |
| 52 | 6 | 0 | 0.946443  | -1.637448 | -2.557048 |
| 53 | 1 | 0 | 0.044064  | -1.034208 | -2.481886 |
| 54 | 1 | 0 | 1.644926  | -1.127273 | -3.225038 |
| 55 | 1 | 0 | 0.663967  | -2.574355 | -3.045741 |
| 56 | 6 | 0 | 1.459070  | 2.008473  | 1.206923  |
| 57 | 6 | 0 | 0.901533  | 1.630958  | 2.563483  |
| 58 | 1 | 0 | -0.040918 | 1.089628  | 2.491253  |
| 59 | 1 | 0 | 1.600608  | 1.021835  | 3.140950  |
| 60 | 1 | 0 | 0.708103  | 2.535714  | 3.145475  |
| 61 | 6 | 0 | -4.227388 | 2.903548  | -0.000301 |
| 62 | 1 | 0 | -5.039845 | 3.621045  | -0.000355 |

-----

Compound 1 2RF-CN-TS

Method: b3lyp/6-311g(d,p)

SCF Done: E(RB3LYP) = -1241.22183830 A.U. after 1 cycles

Lowest frequency = -41.9425

Zero-point correction= 0.516219  
(Hartree/Particle)  
Thermal correction to Energy= 0.545036  
Thermal correction to Enthalpy= 0.545980  
Thermal correction to Gibbs Free Energy= 0.456573  
Sum of electronic and zero-point Energies= -1240.705619  
Sum of electronic and thermal Energies= -1240.676802  
Sum of electronic and thermal Enthalpies= -1240.675858  
Sum of electronic and thermal Free Energies= -1240.765265

Standard orientation:

-----

| Center<br>Number | Atomic<br>Number | Atomic<br>Type | Coordinates (Angstroms) |   |   |
|------------------|------------------|----------------|-------------------------|---|---|
|                  |                  |                | X                       | Y | Z |

|    |   |   |           |           |           |
|----|---|---|-----------|-----------|-----------|
| 1  | 5 | 0 | 0.500299  | 0.129800  | -0.010954 |
| 2  | 6 | 0 | 5.972960  | -2.176056 | 0.013135  |
| 3  | 1 | 0 | 6.004819  | -3.162000 | -0.455352 |
| 4  | 1 | 0 | 6.689717  | -1.527649 | -0.495644 |
| 5  | 1 | 0 | 6.315139  | -2.293392 | 1.047490  |
| 6  | 6 | 0 | 4.583867  | -1.594615 | -0.020231 |
| 7  | 6 | 0 | 3.459199  | -2.413588 | -0.024542 |
| 8  | 1 | 0 | 3.597916  | -3.489852 | -0.030200 |
| 9  | 6 | 0 | 1.933455  | -0.486283 | -0.021295 |
| 10 | 6 | 0 | 4.378856  | -0.217828 | -0.024302 |
| 11 | 1 | 0 | 5.242337  | 0.439579  | -0.029829 |
| 12 | 6 | 0 | -0.570986 | 3.712169  | -1.171862 |
| 13 | 1 | 0 | -0.721988 | 4.233087  | -2.113730 |
| 14 | 6 | 0 | -0.838547 | 4.376442  | 0.021809  |
| 15 | 6 | 0 | -0.546487 | 3.701227  | 1.203532  |
| 16 | 1 | 0 | -0.678100 | 4.213415  | 2.153065  |
| 17 | 6 | 0 | 0.127559  | 1.688258  | -0.000554 |
| 18 | 6 | 0 | -1.405766 | 5.774616  | 0.034107  |
| 19 | 1 | 0 | -1.082725 | 6.329499  | 0.918329  |
| 20 | 1 | 0 | -1.100574 | 6.337834  | -0.851185 |
| 21 | 1 | 0 | -2.501128 | 5.751878  | 0.045046  |
| 22 | 7 | 0 | -0.725156 | -0.776772 | -0.004121 |
| 23 | 6 | 0 | -1.477452 | -1.124801 | 1.124623  |
| 24 | 6 | 0 | -1.499371 | -1.114165 | -1.121159 |
| 25 | 6 | 0 | -2.754733 | -1.603251 | 0.732631  |
| 26 | 6 | 0 | -1.096683 | -1.157165 | 2.470184  |
| 27 | 6 | 0 | -2.768786 | -1.596473 | -0.708866 |
| 28 | 6 | 0 | -3.670851 | -2.032574 | 1.696651  |
| 29 | 6 | 0 | -2.021927 | -1.594258 | 3.412191  |
| 30 | 1 | 0 | -0.099822 | -0.877780 | 2.780202  |
| 31 | 6 | 0 | -3.703491 | -2.017016 | -1.658811 |
| 32 | 6 | 0 | -3.306309 | -2.013404 | 3.036280  |
| 33 | 1 | 0 | -4.649635 | -2.392574 | 1.398683  |
| 34 | 1 | 0 | -1.734992 | -1.624369 | 4.457529  |
| 35 | 1 | 0 | -4.676287 | -2.379945 | -1.345203 |
| 36 | 1 | 0 | -4.005490 | -2.347370 | 3.794047  |
| 37 | 6 | 0 | -2.088204 | -1.562745 | -3.401956 |
| 38 | 1 | 0 | -1.821597 | -1.583253 | -4.452893 |
| 39 | 6 | 0 | -1.144822 | -1.134228 | -2.474111 |
| 40 | 1 | 0 | -0.154193 | -0.851876 | -2.800948 |
| 41 | 6 | 0 | -0.088690 | 2.401801  | -1.203431 |
| 42 | 6 | 0 | 2.158566  | -1.909337 | -0.024708 |
| 43 | 6 | 0 | 1.073879  | -2.968434 | -0.032425 |
| 44 | 1 | 0 | 0.433059  | -2.914681 | 0.848020  |
| 45 | 1 | 0 | 0.427440  | -2.896951 | -0.907342 |
| 46 | 1 | 0 | 1.535896  | -3.957181 | -0.043692 |
| 47 | 6 | 0 | 0.249601  | 1.833972  | -2.566851 |
| 48 | 1 | 0 | 0.672924  | 2.614709  | -3.204585 |
| 49 | 1 | 0 | 0.986110  | 1.029370  | -2.508843 |
| 50 | 1 | 0 | -0.634969 | 1.442026  | -3.073961 |
| 51 | 6 | 0 | -0.063705 | 2.390661  | 1.213137  |
| 52 | 6 | 0 | 0.302206  | 1.810407  | 2.564166  |
| 53 | 1 | 0 | -0.571880 | 1.413232  | 3.085216  |
| 54 | 1 | 0 | 1.037808  | 1.006939  | 2.483926  |
| 55 | 1 | 0 | 0.737728  | 2.585551  | 3.200495  |
| 56 | 6 | 0 | 3.106060  | 0.349705  | -0.024344 |
| 57 | 6 | 0 | 3.087606  | 1.864331  | -0.031664 |
| 58 | 1 | 0 | 2.573285  | 2.270834  | -0.902341 |
| 59 | 1 | 0 | 2.589176  | 2.279285  | 0.844374  |

|    |   |   |           |           |           |
|----|---|---|-----------|-----------|-----------|
| 60 | 1 | 0 | 4.111901  | 2.241024  | -0.042666 |
| 61 | 6 | 0 | -3.365075 | -1.985444 | -3.005044 |
| 62 | 1 | 0 | -4.078858 | -2.312524 | -3.752123 |

-----

Compound 1 3RF-TS

Method: b3lyp/6-311g(d,p)

SCF Done: E(RB3LYP) = -1241.17771446 A.U. after 1 cycles

Lowest frequency = -62.3403

|                                              |              |
|----------------------------------------------|--------------|
| Zero-point correction=                       | 0.516372     |
| (Hartree/Particle)                           |              |
| Thermal correction to Energy=                | 0.545387     |
| Thermal correction to Enthalpy=              | 0.546331     |
| Thermal correction to Gibbs Free Energy=     | 0.455417     |
| Sum of electronic and zero-point Energies=   | -1240.661342 |
| Sum of electronic and thermal Energies=      | -1240.632328 |
| Sum of electronic and thermal Enthalpies=    | -1240.631384 |
| Sum of electronic and thermal Free Energies= | -1240.722297 |

Standard orientation:

| Center<br>Number | Atomic<br>Number | Atomic<br>Type | Coordinates (Angstroms) |           |           |
|------------------|------------------|----------------|-------------------------|-----------|-----------|
|                  |                  |                | X                       | Y         | Z         |
| 1                | 6                | 0              | 3.041736                | -1.406796 | -0.551981 |
| 2                | 6                | 0              | 3.249879                | -0.757706 | 0.715435  |
| 3                | 6                | 0              | 1.967210                | -0.471884 | 1.238794  |
| 4                | 7                | 0              | 0.952386                | -0.832850 | 0.312585  |
| 5                | 6                | 0              | 1.641311                | -1.511618 | -0.735152 |
| 6                | 6                | 0              | 1.151736                | -2.253759 | -1.809011 |
| 7                | 6                | 0              | 2.048798                | -2.818880 | -2.711232 |
| 8                | 6                | 0              | 3.930946                | -1.971455 | -1.468792 |
| 9                | 6                | 0              | 4.402675                | -0.530951 | 1.470692  |
| 10               | 6                | 0              | 3.006820                | 0.120920  | 3.325972  |
| 11               | 6                | 0              | 1.851663                | -0.095768 | 2.580275  |
| 12               | 1                | 0              | 0.102245                | -2.440522 | -1.924880 |
| 13               | 1                | 0              | 1.659857                | -3.404023 | -3.537237 |
| 14               | 1                | 0              | 5.000579                | -1.879034 | -1.315859 |
| 15               | 1                | 0              | 5.379703                | -0.749283 | 1.054054  |
| 16               | 1                | 0              | 2.912369                | 0.414737  | 4.365365  |
| 17               | 1                | 0              | 0.892325                | -0.023922 | 3.065492  |
| 18               | 5                | 0              | -0.361717               | -0.087510 | 0.093378  |
| 19               | 6                | 0              | -1.811316               | -0.834127 | 0.232628  |
| 20               | 6                | 0              | -2.606217               | -1.620147 | -0.657108 |
| 21               | 6                | 0              | -2.410350               | -0.578486 | 1.500742  |
| 22               | 6                | 0              | -3.911324               | -1.989876 | -0.300202 |
| 23               | 6                | 0              | -3.706280               | -0.981894 | 1.817528  |
| 24               | 6                | 0              | -4.500127               | -1.674293 | 0.915627  |
| 25               | 1                | 0              | -4.486338               | -2.566670 | -1.018437 |
| 26               | 1                | 0              | -4.094712               | -0.741075 | 2.803463  |
| 27               | 6                | 0              | -0.325128               | 1.504597  | -0.295389 |
| 28               | 6                | 0              | -0.563426               | 1.759260  | -1.680388 |
| 29               | 6                | 0              | -0.096178               | 2.666663  | 0.501782  |
| 30               | 6                | 0              | -0.606459               | 3.051826  | -2.200838 |
| 31               | 6                | 0              | -0.169523               | 3.946450  | -0.067630 |
| 32               | 6                | 0              | -0.433412               | 4.177597  | -1.407817 |
| 33               | 1                | 0              | -0.774768               | 3.171031  | -3.267286 |
| 34               | 1                | 0              | 0.006286                | 4.799115  | 0.581097  |

|    |   |   |           |           |           |
|----|---|---|-----------|-----------|-----------|
| 35 | 6 | 0 | -1.653457 | 0.075680  | 2.627228  |
| 36 | 1 | 0 | -1.267040 | -0.682856 | 3.316609  |
| 37 | 1 | 0 | -0.812631 | 0.662451  | 2.280815  |
| 38 | 1 | 0 | -2.294728 | 0.748362  | 3.202021  |
| 39 | 6 | 0 | -2.192202 | -2.231862 | -1.984677 |
| 40 | 1 | 0 | -1.468035 | -1.664463 | -2.550280 |
| 41 | 1 | 0 | -1.786928 | -3.236289 | -1.819117 |
| 42 | 1 | 0 | -3.069523 | -2.352658 | -2.623715 |
| 43 | 6 | 0 | -5.924507 | -2.053592 | 1.232863  |
| 44 | 1 | 0 | -6.611487 | -1.236958 | 0.984884  |
| 45 | 1 | 0 | -6.240054 | -2.931072 | 0.663824  |
| 46 | 1 | 0 | -6.050999 | -2.273912 | 2.295739  |
| 47 | 6 | 0 | 0.229426  | 2.713476  | 1.982893  |
| 48 | 1 | 0 | -0.674680 | 2.726364  | 2.598878  |
| 49 | 1 | 0 | 0.863915  | 1.899936  | 2.312497  |
| 50 | 1 | 0 | 0.771042  | 3.635391  | 2.202010  |
| 51 | 6 | 0 | -0.781082 | 0.663149  | -2.694229 |
| 52 | 1 | 0 | -0.114165 | -0.186022 | -2.545984 |
| 53 | 1 | 0 | -1.815406 | 0.314599  | -2.671339 |
| 54 | 1 | 0 | -0.585353 | 1.035331  | -3.701714 |
| 55 | 6 | 0 | -0.525096 | 5.571313  | -1.975799 |
| 56 | 1 | 0 | -0.062610 | 5.629884  | -2.964597 |
| 57 | 1 | 0 | -1.569959 | 5.881426  | -2.086898 |
| 58 | 1 | 0 | -0.033092 | 6.299314  | -1.327089 |
| 59 | 6 | 0 | 3.431355  | -2.666418 | -2.560969 |
| 60 | 1 | 0 | 4.107659  | -3.114503 | -3.279407 |
| 61 | 6 | 0 | 4.278635  | -0.064339 | 2.771612  |
| 62 | 1 | 0 | 5.161791  | 0.110333  | 3.374971  |

-----

Compound 2a GS1

Method: b3lyp/6-311g(d,p)

SCF Done: E(RB3LYP) = -1359.23226478 A.U. after 1 cycles

Lowest frequency = 20.3061

Zero-point correction= 0.599596  
(Hartree/Particle)  
Thermal correction to Energy= 0.634376  
Thermal correction to Enthalpy= 0.635320  
Thermal correction to Gibbs Free Energy= 0.530947  
Sum of electronic and zero-point Energies= -1358.632668  
Sum of electronic and thermal Energies= -1358.597889  
Sum of electronic and thermal Enthalpies= -1358.596945  
Sum of electronic and thermal Free Energies= -1358.701318

Standard orientation:

| Center<br>Number | Atomic<br>Number | Atomic<br>Type | Coordinates (Angstroms) |          |           |
|------------------|------------------|----------------|-------------------------|----------|-----------|
|                  |                  |                | X                       | Y        | Z         |
| 1                | 5                | 0              | 0.941061                | 0.239899 | -0.066015 |
| 2                | 6                | 0              | 3.354360                | 0.898133 | -1.835695 |
| 3                | 1                | 0              | 2.677123                | 0.418903 | -2.548960 |
| 4                | 1                | 0              | 2.949466                | 1.889799 | -1.623885 |
| 5                | 1                | 0              | 4.316205                | 1.025411 | -2.336194 |
| 6                | 6                | 0              | 1.578389                | 2.250838 | 2.156275  |
| 7                | 1                | 0              | 1.730460                | 3.101015 | 2.824052  |
| 8                | 1                | 0              | 0.913398                | 1.549171 | 2.668601  |
| 9                | 1                | 0              | 2.538419                | 1.747339 | 2.025809  |

|    |   |   |           |           |           |
|----|---|---|-----------|-----------|-----------|
| 10 | 6 | 0 | -0.344429 | 1.426067  | -2.535716 |
| 11 | 1 | 0 | 0.342282  | 0.597755  | -2.716470 |
| 12 | 1 | 0 | -1.329554 | 0.988549  | -2.346729 |
| 13 | 1 | 0 | -0.414352 | 2.006572  | -3.458072 |
| 14 | 6 | 0 | 0.055474  | 6.076557  | -0.709846 |
| 15 | 1 | 0 | -0.175378 | 6.572545  | 0.236032  |
| 16 | 1 | 0 | 0.967154  | 6.537928  | -1.105673 |
| 17 | 1 | 0 | -0.751735 | 6.292539  | -1.413554 |
| 18 | 6 | 0 | 0.240362  | 4.590593  | -0.522045 |
| 19 | 6 | 0 | 0.777793  | 4.074842  | 0.656873  |
| 20 | 1 | 0 | 1.036456  | 4.756211  | 1.462412  |
| 21 | 6 | 0 | 1.000273  | 2.708110  | 0.833736  |
| 22 | 6 | 0 | 0.650489  | 1.792748  | -0.190353 |
| 23 | 6 | 0 | 0.088280  | 2.311545  | -1.384411 |
| 24 | 6 | 0 | -0.093051 | 3.688738  | -1.530321 |
| 25 | 1 | 0 | -0.512399 | 4.065464  | -2.459065 |
| 26 | 6 | 0 | 2.649362  | -1.081489 | 1.380435  |
| 27 | 6 | 0 | 3.952082  | -1.475884 | 1.693912  |
| 28 | 1 | 0 | 4.116966  | -2.074355 | 2.585532  |
| 29 | 6 | 0 | 5.042026  | -1.131794 | 0.897282  |
| 30 | 6 | 0 | 4.796441  | -0.361660 | -0.239083 |
| 31 | 1 | 0 | 5.627983  | -0.088771 | -0.882602 |
| 32 | 6 | 0 | 3.513998  | 0.075981  | -0.574358 |
| 33 | 6 | 0 | 2.406146  | -0.284621 | 0.232961  |
| 34 | 6 | 0 | 1.540362  | -1.546667 | 2.302777  |
| 35 | 1 | 0 | 1.034034  | -2.427359 | 1.895693  |
| 36 | 1 | 0 | 1.946374  | -1.823274 | 3.278125  |
| 37 | 1 | 0 | 0.775101  | -0.786338 | 2.465550  |
| 38 | 6 | 0 | 6.443817  | -1.551302 | 1.266734  |
| 39 | 1 | 0 | 7.059406  | -1.711743 | 0.378313  |
| 40 | 1 | 0 | 6.937104  | -0.781129 | 1.870231  |
| 41 | 1 | 0 | 6.443185  | -2.473872 | 1.851793  |
| 42 | 7 | 0 | -0.143670 | -0.707723 | -0.226048 |
| 43 | 6 | 0 | -0.046794 | -2.053582 | -0.682402 |
| 44 | 6 | 0 | -1.525203 | -0.481181 | 0.039597  |
| 45 | 6 | 0 | -1.328691 | -2.644573 | -0.706614 |
| 46 | 6 | 0 | 1.065832  | -2.764287 | -1.137362 |
| 47 | 6 | 0 | -2.265560 | -1.647553 | -0.234166 |
| 48 | 6 | 0 | -1.497338 | -3.957190 | -1.153268 |
| 49 | 6 | 0 | 0.880087  | -4.072623 | -1.575490 |
| 50 | 1 | 0 | 2.051497  | -2.324064 | -1.147567 |
| 51 | 6 | 0 | -3.645043 | -1.683307 | -0.015883 |
| 52 | 6 | 0 | -0.385991 | -4.670968 | -1.581649 |
| 53 | 1 | 0 | -2.483245 | -4.408294 | -1.170533 |
| 54 | 1 | 0 | 1.739262  | -4.635255 | -1.922880 |
| 55 | 6 | 0 | -4.303691 | -0.563751 | 0.484869  |
| 56 | 1 | 0 | -4.204810 | -2.588143 | -0.230973 |
| 57 | 1 | 0 | -0.497572 | -5.690982 | -1.931023 |
| 58 | 6 | 0 | -3.541081 | 0.584046  | 0.772037  |
| 59 | 1 | 0 | -4.033364 | 1.462925  | 1.174003  |
| 60 | 6 | 0 | -2.167099 | 0.641378  | 0.566507  |
| 61 | 1 | 0 | -1.623449 | 1.542656  | 0.807166  |
| 62 | 6 | 0 | -5.807171 | -0.589737 | 0.722044  |
| 63 | 1 | 0 | -6.155639 | -1.587532 | 0.431391  |
| 64 | 6 | 0 | -6.161813 | -0.394659 | 2.207329  |
| 65 | 1 | 0 | -7.241450 | -0.483879 | 2.361419  |
| 66 | 1 | 0 | -5.665244 | -1.141037 | 2.832344  |
| 67 | 1 | 0 | -5.856644 | 0.594099  | 2.562451  |
| 68 | 6 | 0 | -6.546911 | 0.430400  | -0.162412 |
| 69 | 1 | 0 | -6.255980 | 1.455431  | 0.085712  |

|    |   |   |           |          |           |
|----|---|---|-----------|----------|-----------|
| 70 | 1 | 0 | -6.325665 | 0.268236 | -1.220284 |
| 71 | 1 | 0 | -7.629256 | 0.349165 | -0.023540 |

-----

Compound 2a GS2

Method: b3lyp/6-311g(d,p)

SCF Done: E(RB3LYP) = -1359.23206247 A.U. after 1 cycles

Lowest frequency = 18.8925

|                                              |              |
|----------------------------------------------|--------------|
| Zero-point correction=                       | 0.599560     |
| (Hartree/Particle)                           |              |
| Thermal correction to Energy=                | 0.634349     |
| Thermal correction to Enthalpy=              | 0.635293     |
| Thermal correction to Gibbs Free Energy=     | 0.530756     |
| Sum of electronic and zero-point Energies=   | -1358.632502 |
| Sum of electronic and thermal Energies=      | -1358.597713 |
| Sum of electronic and thermal Enthalpies=    | -1358.596769 |
| Sum of electronic and thermal Free Energies= | -1358.701306 |

Standard orientation:

| Center<br>Number | Atomic<br>Number | Atomic<br>Type | Coordinates (Angstroms) |           |           |
|------------------|------------------|----------------|-------------------------|-----------|-----------|
|                  |                  |                | X                       | Y         | Z         |
| 1                | 5                | 0              | 0.979303                | 0.201280  | -0.052237 |
| 2                | 6                | 0              | 3.421566                | 0.564886  | -1.867463 |
| 3                | 1                | 0              | 2.676677                | 0.188291  | -2.574923 |
| 4                | 1                | 0              | 3.150052                | 1.596019  | -1.632679 |
| 5                | 1                | 0              | 4.383043                | 0.577612  | -2.384404 |
| 6                | 6                | 0              | 1.914546                | 2.069734  | 2.189835  |
| 7                | 1                | 0              | 2.200441                | 2.879887  | 2.863460  |
| 8                | 1                | 0              | 1.166958                | 1.462873  | 2.709488  |
| 9                | 1                | 0              | 2.789858                | 1.436566  | 2.031670  |
| 10               | 6                | 0              | -0.181532               | 1.592180  | -2.475937 |
| 11               | 1                | 0              | 0.381113                | 0.679655  | -2.678245 |
| 12               | 1                | 0              | -1.215392               | 1.292720  | -2.277879 |
| 13               | 1                | 0              | -0.182438               | 2.191063  | -3.389178 |
| 14               | 6                | 0              | 0.859662                | 6.114939  | -0.583776 |
| 15               | 1                | 0              | 0.710749                | 6.619155  | 0.374129  |
| 16               | 1                | 0              | 1.817819                | 6.460035  | -0.988175 |
| 17               | 1                | 0              | 0.076960                | 6.447990  | -1.269262 |
| 18               | 6                | 0              | 0.850456                | 4.614313  | -0.423742 |
| 19               | 6                | 0              | 1.335887                | 4.010582  | 0.735806  |
| 20               | 1                | 0              | 1.696334                | 4.636971  | 1.546853  |
| 21               | 6                | 0              | 1.379342                | 2.623448  | 0.886271  |
| 22               | 6                | 0              | 0.894181                | 1.781032  | -0.145148 |
| 23               | 6                | 0              | 0.384593                | 2.391337  | -1.319327 |
| 24               | 6                | 0              | 0.383631                | 3.782909  | -1.439552 |
| 25               | 1                | 0              | 0.001543                | 4.228543  | -2.353766 |
| 26               | 6                | 0              | 2.526830                | -1.360238 | 1.334653  |
| 27               | 6                | 0              | 3.771484                | -1.930360 | 1.611521  |
| 28               | 1                | 0              | 3.873791                | -2.561488 | 2.489901  |
| 29               | 6                | 0              | 4.880506                | -1.720150 | 0.794823  |
| 30               | 6                | 0              | 4.715986                | -0.903742 | -0.323680 |
| 31               | 1                | 0              | 5.562726                | -0.732366 | -0.982267 |
| 32               | 6                | 0              | 3.496655                | -0.293242 | -0.622327 |
| 33               | 6                | 0              | 2.367997                | -0.517545 | 0.205203  |
| 34               | 6                | 0              | 1.385115                | -1.689282 | 2.275449  |
| 35               | 1                | 0              | 0.753233                | -2.482853 | 1.864780  |

|    |   |   |           |           |           |
|----|---|---|-----------|-----------|-----------|
| 36 | 1 | 0 | 1.770640  | -2.040372 | 3.235007  |
| 37 | 1 | 0 | 0.735958  | -0.834601 | 2.471473  |
| 38 | 6 | 0 | 6.221268  | -2.329246 | 1.124840  |
| 39 | 1 | 0 | 6.789488  | -2.557133 | 0.219748  |
| 40 | 1 | 0 | 6.827032  | -1.641368 | 1.725313  |
| 41 | 1 | 0 | 6.109974  | -3.252248 | 1.698495  |
| 42 | 7 | 0 | -0.223985 | -0.591632 | -0.203084 |
| 43 | 6 | 0 | -0.315203 | -1.931081 | -0.679815 |
| 44 | 6 | 0 | -1.557943 | -0.188855 | 0.096805  |
| 45 | 6 | 0 | -1.663604 | -2.348380 | -0.682510 |
| 46 | 6 | 0 | 0.684335  | -2.773806 | -1.170502 |
| 47 | 6 | 0 | -2.452235 | -1.244834 | -0.175565 |
| 48 | 6 | 0 | -2.012807 | -3.619762 | -1.142999 |
| 49 | 6 | 0 | 0.318964  | -4.039064 | -1.622150 |
| 50 | 1 | 0 | 1.718843  | -2.466487 | -1.197999 |
| 51 | 6 | 0 | -3.818095 | -1.105990 | 0.071320  |
| 52 | 6 | 0 | -1.014445 | -4.466154 | -1.606873 |
| 53 | 1 | 0 | -3.049617 | -3.937329 | -1.143760 |
| 54 | 1 | 0 | 1.089173  | -4.703446 | -1.997378 |
| 55 | 6 | 0 | -4.314179 | 0.085204  | 0.601311  |
| 56 | 1 | 0 | -4.487744 | -1.931605 | -0.145424 |
| 57 | 1 | 0 | -1.266679 | -5.456722 | -1.967526 |
| 58 | 6 | 0 | -3.402876 | 1.115926  | 0.884485  |
| 59 | 1 | 0 | -3.776599 | 2.042933  | 1.307416  |
| 60 | 6 | 0 | -2.035128 | 0.998445  | 0.650453  |
| 61 | 1 | 0 | -1.374668 | 1.818185  | 0.890414  |
| 62 | 6 | 0 | -5.799342 | 0.273905  | 0.879908  |
| 63 | 1 | 0 | -5.918346 | 1.282202  | 1.292606  |
| 64 | 6 | 0 | -6.640277 | 0.203265  | -0.407653 |
| 65 | 1 | 0 | -7.693857 | 0.406672  | -0.193266 |
| 66 | 1 | 0 | -6.295092 | 0.932805  | -1.144491 |
| 67 | 1 | 0 | -6.579873 | -0.788043 | -0.866749 |
| 68 | 6 | 0 | -6.319804 | -0.717935 | 1.935947  |
| 69 | 1 | 0 | -6.247195 | -1.750243 | 1.580853  |
| 70 | 1 | 0 | -5.746066 | -0.643754 | 2.863095  |
| 71 | 1 | 0 | -7.370669 | -0.519729 | 2.167765  |

-----

Compound 2a 1RF-C1-TSa

Method: b3lyp/6-311g(d,p)

SCF Done: E(RB3LYP) = -1359.15973694 A.U. after 1 cycles

Lowest frequency = -41.3058

Zero-point correction= 0.599407  
(Hartree/Particle)  
Thermal correction to Energy= 0.632723  
Thermal correction to Enthalpy= 0.633667  
Thermal correction to Gibbs Free Energy= 0.534326  
Sum of electronic and zero-point Energies= -1358.560330  
Sum of electronic and thermal Energies= -1358.527014  
Sum of electronic and thermal Enthalpies= -1358.526070  
Sum of electronic and thermal Free Energies= -1358.625411

Standard orientation:

-----

| Center<br>Number | Atomic<br>Number | Atomic<br>Type | Coordinates (Angstroms) |           |           |
|------------------|------------------|----------------|-------------------------|-----------|-----------|
|                  |                  |                | X                       | Y         | Z         |
| 1                | 6                | 0              | 2.234194                | -1.227164 | -0.646754 |

-----



|    |   |   |           |           |           |
|----|---|---|-----------|-----------|-----------|
| 2  | 6 | 0 | 1.205536  | -2.000947 | -1.311909 |
| 3  | 6 | 0 | -0.000939 | -1.774685 | -0.608669 |
| 4  | 7 | 0 | 0.176725  | -0.670503 | 0.315386  |
| 5  | 6 | 0 | 1.598438  | -0.544220 | 0.408316  |
| 6  | 6 | 0 | 2.366279  | -0.127200 | 1.488527  |
| 7  | 6 | 0 | 3.754931  | -0.197137 | 1.405658  |
| 8  | 6 | 0 | 3.625446  | -1.272426 | -0.735493 |
| 9  | 6 | 0 | 1.291786  | -2.978557 | -2.302577 |
| 10 | 6 | 0 | 0.187971  | -3.784274 | -2.553929 |
| 11 | 6 | 0 | -0.965972 | -3.635486 | -1.781012 |
| 12 | 6 | 0 | -1.071187 | -2.646983 | -0.801781 |
| 13 | 1 | 0 | 1.901259  | 0.200073  | 2.404620  |
| 14 | 1 | 0 | 4.339291  | 0.137692  | 2.255923  |
| 15 | 1 | 0 | 4.100881  | -1.792126 | -1.561335 |
| 16 | 1 | 0 | 2.221447  | -3.131307 | -2.839490 |
| 17 | 1 | 0 | -1.799308 | -4.314364 | -1.924051 |
| 18 | 1 | 0 | -1.960944 | -2.592900 | -0.198568 |
| 19 | 5 | 0 | -0.892097 | 0.344077  | 0.503988  |
| 20 | 6 | 0 | -2.351298 | -0.296193 | 0.558705  |
| 21 | 6 | 0 | -3.188442 | -0.488656 | -0.558411 |
| 22 | 6 | 0 | -2.814874 | -0.719796 | 1.826329  |
| 23 | 6 | 0 | -4.449325 | -1.070230 | -0.392292 |
| 24 | 6 | 0 | -4.078493 | -1.296144 | 1.955567  |
| 25 | 6 | 0 | -4.918217 | -1.478134 | 0.854029  |
| 26 | 1 | 0 | -5.080256 | -1.210864 | -1.266316 |
| 27 | 1 | 0 | -4.416251 | -1.611189 | 2.939224  |
| 28 | 6 | 0 | -0.735227 | 1.940490  | 0.402317  |
| 29 | 6 | 0 | 0.462880  | 2.729048  | 0.481189  |
| 30 | 6 | 0 | -1.834257 | 2.646764  | -0.203844 |
| 31 | 6 | 0 | 0.666162  | 3.812266  | -0.367987 |
| 32 | 6 | 0 | -1.593131 | 3.739458  | -1.046073 |
| 33 | 6 | 0 | -0.326447 | 4.278339  | -1.230175 |
| 34 | 1 | 0 | 1.605790  | 4.353925  | -0.298852 |
| 35 | 1 | 0 | -2.443793 | 4.207408  | -1.533676 |
| 36 | 6 | 0 | -1.952544 | -0.551229 | 3.060039  |
| 37 | 1 | 0 | -1.023083 | -1.123328 | 2.978444  |
| 38 | 1 | 0 | -1.675101 | 0.496987  | 3.215133  |
| 39 | 1 | 0 | -2.475801 | -0.891105 | 3.956025  |
| 40 | 6 | 0 | -2.763731 | -0.125512 | -1.966705 |
| 41 | 1 | 0 | -1.878107 | 0.509615  | -1.988314 |
| 42 | 1 | 0 | -2.533725 | -1.026043 | -2.543529 |
| 43 | 1 | 0 | -3.565061 | 0.400699  | -2.494027 |
| 44 | 6 | 0 | -6.295232 | -2.075318 | 1.018891  |
| 45 | 1 | 0 | -6.681913 | -2.453454 | 0.069972  |
| 46 | 1 | 0 | -6.288916 | -2.900969 | 1.735495  |
| 47 | 1 | 0 | -7.006392 | -1.329207 | 1.390310  |
| 48 | 6 | 0 | -3.305727 | 2.436621  | 0.118923  |
| 49 | 1 | 0 | -3.877388 | 2.000782  | -0.701369 |
| 50 | 1 | 0 | -3.468678 | 1.828770  | 1.002332  |
| 51 | 1 | 0 | -3.730204 | 3.426714  | 0.313138  |
| 52 | 6 | 0 | 1.434004  | 2.646397  | 1.640734  |
| 53 | 1 | 0 | 1.091786  | 1.961409  | 2.410628  |
| 54 | 1 | 0 | 2.449941  | 2.384570  | 1.347714  |
| 55 | 1 | 0 | 1.470078  | 3.638939  | 2.101829  |
| 56 | 6 | 0 | -0.064009 | 5.383266  | -2.218521 |
| 57 | 1 | 0 | -0.976189 | 5.936005  | -2.454550 |
| 58 | 1 | 0 | 0.679543  | 6.090456  | -1.842172 |
| 59 | 1 | 0 | 0.324207  | 4.973880  | -3.157988 |
| 60 | 6 | 0 | 4.409247  | -0.722594 | 0.278883  |
| 61 | 6 | 0 | 5.928352  | -0.769443 | 0.195660  |

|    |   |   |          |           |           |
|----|---|---|----------|-----------|-----------|
| 62 | 1 | 0 | 6.177418 | -1.253509 | -0.755621 |
| 63 | 6 | 0 | 6.548185 | -1.620001 | 1.319114  |
| 64 | 1 | 0 | 7.632815 | -1.691692 | 1.194104  |
| 65 | 1 | 0 | 6.356819 | -1.181840 | 2.303035  |
| 66 | 1 | 0 | 6.137166 | -2.632539 | 1.319391  |
| 67 | 6 | 0 | 6.542052 | 0.642234  | 0.167086  |
| 68 | 1 | 0 | 7.627371 | 0.589720  | 0.038020  |
| 69 | 1 | 0 | 6.129438 | 1.234805  | -0.653260 |
| 70 | 1 | 0 | 6.343104 | 1.178624  | 1.099728  |
| 71 | 1 | 0 | 0.237696 | -4.556828 | -3.312603 |

-----

Compound 2a 1RF-C1-TSb

Method: b3lyp/6-311g(d,p)

SCF Done: E(RB3LYP) = -1359.15965177 A.U. after 1 cycles

Lowest frequency = -41.0584

Zero-point correction= 0.599413  
(Hartree/Particle)  
Thermal correction to Energy= 0.632729  
Thermal correction to Enthalpy= 0.633673  
Thermal correction to Gibbs Free Energy= 0.534289  
Sum of electronic and zero-point Energies= -1358.560239  
Sum of electronic and thermal Energies= -1358.526923  
Sum of electronic and thermal Enthalpies= -1358.525979  
Sum of electronic and thermal Free Energies= -1358.625362

Standard orientation:

| Center<br>Number | Atomic<br>Number | Atomic<br>Type | Coordinates (Angstroms) |           |           |
|------------------|------------------|----------------|-------------------------|-----------|-----------|
|                  |                  |                | X                       | Y         | Z         |
| 1                | 6                | 0              | 2.325920                | -1.078945 | -0.414842 |
| 2                | 6                | 0              | 1.377317                | -1.908411 | -1.131543 |
| 3                | 6                | 0              | 0.121342                | -1.736976 | -0.503861 |
| 4                | 7                | 0              | 0.187666                | -0.616796 | 0.415886  |
| 5                | 6                | 0              | 1.593148                | -0.420465 | 0.594742  |
| 6                | 6                | 0              | 2.271148                | 0.042394  | 1.712724  |
| 7                | 6                | 0              | 3.666297                | 0.044154  | 1.708857  |
| 8                | 6                | 0              | 3.718281                | -1.056783 | -0.422417 |
| 9                | 6                | 0              | 1.570646                | -2.888526 | -2.104204 |
| 10               | 6                | 0              | 0.524952                | -3.750534 | -2.411702 |
| 11               | 6                | 0              | -0.678902               | -3.653342 | -1.710209 |
| 12               | 6                | 0              | -0.891012               | -2.663245 | -0.749995 |
| 13               | 1                | 0              | 1.737756                | 0.353358  | 2.596608  |
| 14               | 1                | 0              | 4.190389                | 0.417424  | 2.582972  |
| 15               | 1                | 0              | 4.258460                | -1.564602 | -1.214271 |
| 16               | 1                | 0              | 2.537060                | -2.999212 | -2.583475 |
| 17               | 1                | 0              | -1.467785               | -4.373972 | -1.894969 |
| 18               | 1                | 0              | -1.816957               | -2.648182 | -0.201493 |
| 19               | 5                | 0              | -0.938206               | 0.345418  | 0.528116  |
| 20               | 6                | 0              | -2.364908               | -0.365988 | 0.500367  |
| 21               | 6                | 0              | -3.120997               | -0.608177 | -0.663935 |
| 22               | 6                | 0              | -2.884061               | -0.803367 | 1.741442  |
| 23               | 6                | 0              | -4.359204               | -1.251136 | -0.569435 |
| 24               | 6                | 0              | -4.123090               | -1.441538 | 1.798904  |
| 25               | 6                | 0              | -4.883172               | -1.673295 | 0.649969  |
| 26               | 1                | 0              | -4.927286               | -1.429495 | -1.478966 |
| 27               | 1                | 0              | -4.504815               | -1.766161 | 2.763170  |

|    |   |   |           |           |           |
|----|---|---|-----------|-----------|-----------|
| 28 | 6 | 0 | -0.853753 | 1.947016  | 0.419298  |
| 29 | 6 | 0 | 0.297567  | 2.794648  | 0.559630  |
| 30 | 6 | 0 | -1.948526 | 2.593295  | -0.257484 |
| 31 | 6 | 0 | 0.496738  | 3.880283  | -0.287517 |
| 32 | 6 | 0 | -1.712426 | 3.690455  | -1.095297 |
| 33 | 6 | 0 | -0.465159 | 4.290215  | -1.210793 |
| 34 | 1 | 0 | 1.403012  | 4.468342  | -0.169478 |
| 35 | 1 | 0 | -2.554950 | 4.111839  | -1.636544 |
| 36 | 6 | 0 | -2.108803 | -0.583323 | 3.023877  |
| 37 | 1 | 0 | -1.149987 | -1.110784 | 3.006040  |
| 38 | 1 | 0 | -1.891441 | 0.478221  | 3.183997  |
| 39 | 1 | 0 | -2.669888 | -0.940531 | 3.889732  |
| 40 | 6 | 0 | -2.628351 | -0.234572 | -2.047140 |
| 41 | 1 | 0 | -1.779585 | 0.448900  | -2.020936 |
| 42 | 1 | 0 | -2.312754 | -1.126120 | -2.596863 |
| 43 | 1 | 0 | -3.422405 | 0.241184  | -2.630399 |
| 44 | 6 | 0 | -6.236564 | -2.337297 | 0.736069  |
| 45 | 1 | 0 | -6.539445 | -2.751410 | -0.228185 |
| 46 | 1 | 0 | -6.237060 | -3.148703 | 1.468728  |
| 47 | 1 | 0 | -7.007440 | -1.622113 | 1.043784  |
| 48 | 6 | 0 | -3.424365 | 2.312035  | -0.020120 |
| 49 | 1 | 0 | -3.923336 | 1.840281  | -0.867546 |
| 50 | 1 | 0 | -3.609348 | 1.704663  | 0.859293  |
| 51 | 1 | 0 | -3.908687 | 3.281068  | 0.136654  |
| 52 | 6 | 0 | 1.202740  | 2.769536  | 1.774040  |
| 53 | 1 | 0 | 0.848983  | 2.076561  | 2.531434  |
| 54 | 1 | 0 | 2.245106  | 2.553294  | 1.543229  |
| 55 | 1 | 0 | 1.165609  | 3.767135  | 2.223990  |
| 56 | 6 | 0 | -0.199730 | 5.399435  | -2.193518 |
| 57 | 1 | 0 | -1.122397 | 5.905210  | -2.487094 |
| 58 | 1 | 0 | 0.485736  | 6.144831  | -1.782243 |
| 59 | 1 | 0 | 0.261491  | 5.002698  | -3.104991 |
| 60 | 6 | 0 | 4.411881  | -0.455845 | 0.632127  |
| 61 | 6 | 0 | 5.933342  | -0.413628 | 0.661973  |
| 62 | 1 | 0 | 6.218233  | 0.074295  | 1.601127  |
| 63 | 6 | 0 | 6.502010  | 0.436056  | -0.488925 |
| 64 | 1 | 0 | 7.591405  | 0.507658  | -0.415387 |
| 65 | 1 | 0 | 6.261458  | -0.004142 | -1.461216 |
| 66 | 1 | 0 | 6.091601  | 1.448788  | -0.472008 |
| 67 | 6 | 0 | 6.555882  | -1.821633 | 0.670272  |
| 68 | 1 | 0 | 7.644413  | -1.761100 | 0.763280  |
| 69 | 1 | 0 | 6.174722  | -2.416375 | 1.504051  |
| 70 | 1 | 0 | 6.332242  | -2.361610 | -0.254435 |
| 71 | 1 | 0 | 0.658108  | -4.525742 | -3.157490 |

-----

Compound 2a 1-RF-C-TSa

Method: b3lyp/6-311g(d,p)

SCF Done: E(RB3LYP) = -1359.15967642 A.U. after 1 cycles

Lowest frequency = -43.9232

|                                            |              |
|--------------------------------------------|--------------|
| Zero-point correction=                     | 0.599361     |
| (Hartree/Particle)                         |              |
| Thermal correction to Energy=              | 0.632706     |
| Thermal correction to Enthalpy=            | 0.633650     |
| Thermal correction to Gibbs Free Energy=   | 0.534108     |
| Sum of electronic and zero-point Energies= | -1358.560315 |
| Sum of electronic and thermal Energies=    | -1358.526970 |
| Sum of electronic and thermal Enthalpies=  | -1358.526026 |

Sum of electronic and thermal Free Energies= -1358.625569

Standard orientation:

| Center<br>Number | Atomic<br>Number | Atomic<br>Type | Coordinates (Angstroms) |           |           |
|------------------|------------------|----------------|-------------------------|-----------|-----------|
|                  |                  |                | X                       | Y         | Z         |
| 1                | 6                | 0              | 0.904102                | -2.803014 | -0.483204 |
| 2                | 6                | 0              | 1.813160                | -1.801351 | 0.035566  |
| 3                | 6                | 0              | 1.310616                | -0.543450 | -0.360827 |
| 4                | 7                | 0              | -0.032514               | -0.698695 | -0.888418 |
| 5                | 6                | 0              | -0.124128               | -2.101078 | -1.148577 |
| 6                | 6                | 0              | -0.860149               | -2.750994 | -2.131089 |
| 7                | 6                | 0              | -0.717402               | -4.129685 | -2.286020 |
| 8                | 6                | 0              | 1.030727                | -4.184924 | -0.621638 |
| 9                | 6                | 0              | 3.072667                | -1.926035 | 0.622006  |
| 10               | 6                | 0              | 3.891301                | -0.808741 | 0.769675  |
| 11               | 6                | 0              | 3.421401                | 0.415591  | 0.268277  |
| 12               | 6                | 0              | 2.157687                | 0.562313  | -0.300653 |
| 13               | 6                | 0              | 5.269242                | -0.931545 | 1.404225  |
| 14               | 6                | 0              | 6.396713                | -0.586001 | 0.414573  |
| 15               | 6                | 0              | 5.385271                | -0.092671 | 2.689839  |
| 16               | 1                | 0              | -1.495147               | -2.196599 | -2.802898 |
| 17               | 1                | 0              | -1.295806               | -4.639019 | -3.048675 |
| 18               | 1                | 0              | 1.816050                | -4.720197 | -0.099795 |
| 19               | 1                | 0              | 3.431286                | -2.903792 | 0.928361  |
| 20               | 1                | 0              | 4.065398                | 1.288002  | 0.299467  |
| 21               | 1                | 0              | 1.871383                | 1.517593  | -0.705992 |
| 22               | 1                | 0              | 5.394141                | -1.983100 | 1.687582  |
| 23               | 1                | 0              | 7.376636                | -0.745894 | 0.874553  |
| 24               | 1                | 0              | 6.336152                | -1.205540 | -0.483625 |
| 25               | 1                | 0              | 6.344175                | 0.460905  | 0.101564  |
| 26               | 1                | 0              | 6.358927                | -0.245579 | 3.165314  |
| 27               | 1                | 0              | 4.608295                | -0.364158 | 3.408878  |
| 28               | 1                | 0              | 5.283407                | 0.975419  | 2.475743  |
| 29               | 5                | 0              | -1.094550               | 0.291997  | -0.575915 |
| 30               | 6                | 0              | -0.568039               | 1.796532  | -0.619568 |
| 31               | 6                | 0              | -0.044235               | 2.499403  | 0.483816  |
| 32               | 6                | 0              | -0.613636               | 2.451437  | -1.872667 |
| 33               | 6                | 0              | 0.397120                | 3.816837  | 0.325084  |
| 34               | 6                | 0              | -0.164865               | 3.766501  | -1.994858 |
| 35               | 6                | 0              | 0.343271                | 4.473068  | -0.902153 |
| 36               | 1                | 0              | 0.798091                | 4.342139  | 1.188252  |
| 37               | 1                | 0              | -0.212390               | 4.251720  | -2.966048 |
| 38               | 6                | 0              | -2.556760               | -0.016438 | 0.016087  |
| 39               | 6                | 0              | -3.280407               | -1.257587 | 0.018483  |
| 40               | 6                | 0              | -3.057660               | 0.927724  | 0.981353  |
| 41               | 6                | 0              | -4.002569               | -1.664335 | 1.135943  |
| 42               | 6                | 0              | -3.789752               | 0.483698  | 2.089762  |
| 43               | 6                | 0              | -4.185116               | -0.838452 | 2.245344  |
| 44               | 1                | 0              | -4.500117               | -2.630047 | 1.106153  |
| 45               | 1                | 0              | -4.096861               | 1.218919  | 2.828343  |
| 46               | 6                | 0              | -1.152015               | 1.740331  | -3.096803 |
| 47               | 1                | 0              | -0.549018               | 0.861276  | -3.344815 |
| 48               | 1                | 0              | -2.179563               | 1.394740  | -2.940397 |
| 49               | 1                | 0              | -1.153565               | 2.399937  | -3.966862 |
| 50               | 6                | 0              | 0.105101                | 1.870412  | 1.854079  |
| 51               | 1                | 0              | -0.454365               | 0.940175  | 1.953357  |
| 52               | 1                | 0              | 1.155053                | 1.643348  | 2.060435  |
| 53               | 1                | 0              | -0.238675               | 2.552340  | 2.637570  |

|    |   |   |           |           |           |
|----|---|---|-----------|-----------|-----------|
| 54 | 6 | 0 | 0.794597  | 5.906665  | -1.047332 |
| 55 | 1 | 0 | 1.459183  | 6.199895  | -0.231646 |
| 56 | 1 | 0 | 1.324995  | 6.064541  | -1.990182 |
| 57 | 1 | 0 | -0.060358 | 6.591761  | -1.037697 |
| 58 | 6 | 0 | -3.027248 | 2.441334  | 0.834739  |
| 59 | 1 | 0 | -2.363095 | 2.938256  | 1.542962  |
| 60 | 1 | 0 | -2.760941 | 2.770293  | -0.163923 |
| 61 | 1 | 0 | -4.040829 | 2.798158  | 1.043389  |
| 62 | 6 | 0 | -3.562703 | -2.055603 | -1.238125 |
| 63 | 1 | 0 | -3.194044 | -1.556978 | -2.129583 |
| 64 | 1 | 0 | -3.181089 | -3.075412 | -1.208150 |
| 65 | 1 | 0 | -4.651003 | -2.114788 | -1.343517 |
| 66 | 6 | 0 | -4.877604 | -1.324343 | 3.490677  |
| 67 | 1 | 0 | -5.348419 | -0.502554 | 4.034996  |
| 68 | 1 | 0 | -5.644236 | -2.068353 | 3.259661  |
| 69 | 1 | 0 | -4.159458 | -1.798768 | 4.168973  |
| 70 | 6 | 0 | 0.187199  | -4.852827 | -1.503575 |
| 71 | 1 | 0 | 0.280830  | -5.924383 | -1.637867 |

-----

Compound 2a 1-RF-C-TSb

Method: b3lyp/6-311g(d,p)

SCF Done: E(RB3LYP) = -1359.15957180 A.U. after 1 cycles

Lowest frequency = -44.1321

Zero-point correction= 0.599302  
(Hartree/Particle)  
Thermal correction to Energy= 0.632679  
Thermal correction to Enthalpy= 0.633623  
Thermal correction to Gibbs Free Energy= 0.533728  
Sum of electronic and zero-point Energies= -1358.560270  
Sum of electronic and thermal Energies= -1358.526893  
Sum of electronic and thermal Enthalpies= -1358.525949  
Sum of electronic and thermal Free Energies= -1358.625844

Standard orientation:

| Center<br>Number | Atomic<br>Number | Atomic<br>Type | Coordinates (Angstroms) |           |           |
|------------------|------------------|----------------|-------------------------|-----------|-----------|
|                  |                  |                | X                       | Y         | Z         |
| 1                | 6                | 0              | 1.587200                | -2.360034 | -0.605642 |
| 2                | 6                | 0              | 2.212095                | -1.173168 | -0.056279 |
| 3                | 6                | 0              | 1.391047                | -0.076766 | -0.405391 |
| 4                | 7                | 0              | 0.126039                | -0.561902 | -0.926490 |
| 5                | 6                | 0              | 0.401177                | -1.929622 | -1.238243 |
| 6                | 6                | 0              | -0.154633               | -2.715563 | -2.239607 |
| 7                | 6                | 0              | 0.340944                | -4.002847 | -2.446128 |
| 8                | 6                | 0              | 2.068433                | -3.654859 | -0.795885 |
| 9                | 6                | 0              | 3.467457                | -0.986732 | 0.517287  |
| 10               | 6                | 0              | 3.967107                | 0.303588  | 0.702320  |
| 11               | 6                | 0              | 3.187291                | 1.375113  | 0.247950  |
| 12               | 6                | 0              | 1.919647                | 1.207472  | -0.311795 |
| 13               | 6                | 0              | 5.334345                | 0.549101  | 1.324900  |
| 14               | 6                | 0              | 5.394193                | 0.063931  | 2.784616  |
| 15               | 6                | 0              | 6.471870                | -0.066974 | 0.490319  |
| 16               | 1                | 0              | -0.923199               | -2.324147 | -2.886171 |
| 17               | 1                | 0              | -0.096245               | -4.619660 | -3.223317 |
| 18               | 1                | 0              | 2.974526                | -3.983399 | -0.299234 |
| 19               | 1                | 0              | 4.066693                | -1.851997 | 0.780680  |

|    |   |   |           |           |           |
|----|---|---|-----------|-----------|-----------|
| 20 | 1 | 0 | 3.588823  | 2.381488  | 0.313618  |
| 21 | 1 | 0 | 1.388778  | 2.068675  | -0.679722 |
| 22 | 1 | 0 | 5.487361  | 1.634347  | 1.334155  |
| 23 | 1 | 0 | 6.361982  | 0.306391  | 3.234104  |
| 24 | 1 | 0 | 4.611408  | 0.530676  | 3.387728  |
| 25 | 1 | 0 | 5.260373  | -1.020207 | 2.846994  |
| 26 | 1 | 0 | 7.446158  | 0.181508  | 0.922084  |
| 27 | 1 | 0 | 6.450318  | 0.301727  | -0.538179 |
| 28 | 1 | 0 | 6.393391  | -1.157666 | 0.455245  |
| 29 | 5 | 0 | -1.152284 | 0.104493  | -0.569020 |
| 30 | 6 | 0 | -1.036684 | 1.694661  | -0.557537 |
| 31 | 6 | 0 | -0.695475 | 2.469031  | 0.569184  |
| 32 | 6 | 0 | -1.271798 | 2.359989  | -1.783613 |
| 33 | 6 | 0 | -0.614658 | 3.860840  | 0.459625  |
| 34 | 6 | 0 | -1.182378 | 3.750020  | -1.856937 |
| 35 | 6 | 0 | -0.857439 | 4.524403  | -0.740510 |
| 36 | 1 | 0 | -0.349763 | 4.440836  | 1.340088  |
| 37 | 1 | 0 | -1.370363 | 4.241061  | -2.807967 |
| 38 | 6 | 0 | -2.474212 | -0.594693 | 0.020554  |
| 39 | 6 | 0 | -2.848484 | -1.981284 | -0.017032 |
| 40 | 6 | 0 | -3.190536 | 0.153588  | 1.021147  |
| 41 | 6 | 0 | -3.424200 | -2.598970 | 1.088758  |
| 42 | 6 | 0 | -3.766390 | -0.502408 | 2.116450  |
| 43 | 6 | 0 | -3.801158 | -1.886288 | 2.227184  |
| 44 | 1 | 0 | -3.652577 | -3.659689 | 1.027367  |
| 45 | 1 | 0 | -4.244517 | 0.102434  | 2.881910  |
| 46 | 6 | 0 | -1.627228 | 1.577864  | -3.030994 |
| 47 | 1 | 0 | -0.820355 | 0.896312  | -3.317922 |
| 48 | 1 | 0 | -2.526259 | 0.970438  | -2.880855 |
| 49 | 1 | 0 | -1.815733 | 2.245251  | -3.874298 |
| 50 | 6 | 0 | -0.365225 | 1.850867  | 1.912448  |
| 51 | 1 | 0 | -0.657233 | 0.802599  | 1.976311  |
| 52 | 1 | 0 | 0.710349  | 1.902367  | 2.105088  |
| 53 | 1 | 0 | -0.865719 | 2.387191  | 2.724220  |
| 54 | 6 | 0 | -0.796254 | 6.030323  | -0.832495 |
| 55 | 1 | 0 | -0.224029 | 6.457213  | -0.005882 |
| 56 | 1 | 0 | -0.333173 | 6.354470  | -1.768317 |
| 57 | 1 | 0 | -1.799963 | 6.468288  | -0.798896 |
| 58 | 6 | 0 | -3.557240 | 1.626914  | 0.929038  |
| 59 | 1 | 0 | -3.034754 | 2.255670  | 1.651048  |
| 60 | 1 | 0 | -3.400315 | 2.047355  | -0.058415 |
| 61 | 1 | 0 | -4.625556 | 1.700214  | 1.156030  |
| 62 | 6 | 0 | -2.928991 | -2.784447 | -1.299201 |
| 63 | 1 | 0 | -2.717597 | -2.177558 | -2.174514 |
| 64 | 1 | 0 | -2.291905 | -3.667960 | -1.307355 |
| 65 | 1 | 0 | -3.964651 | -3.125157 | -1.400676 |
| 66 | 6 | 0 | -4.326175 | -2.576702 | 3.457705  |
| 67 | 1 | 0 | -4.988820 | -1.925144 | 4.031873  |
| 68 | 1 | 0 | -4.874045 | -3.487839 | 3.204122  |
| 69 | 1 | 0 | -3.500218 | -2.867814 | 4.116454  |
| 70 | 6 | 0 | 1.415103  | -4.490148 | -1.696550 |
| 71 | 1 | 0 | 1.783463  | -5.494628 | -1.870737 |

-----  
Compound 2a 1-RF-N-TSa

Method: b3lyp/6-311g(d,p)

SCF Done: E(RB3LYP) = -1359.13257745 A.U. after 1 cycles

Lowest frequency = -68.6512

Zero-point correction= 0.600039  
 (Hartree/Particle)  
 Thermal correction to Energy= 0.632644  
 Thermal correction to Enthalpy= 0.633588  
 Thermal correction to Gibbs Free Energy= 0.537002  
 Sum of electronic and zero-point Energies= -1358.532538  
 Sum of electronic and thermal Energies= -1358.499934  
 Sum of electronic and thermal Enthalpies= -1358.498989  
 Sum of electronic and thermal Free Energies= -1358.595575

Standard orientation:

| Center<br>Number | Atomic<br>Number | Atomic<br>Type | Coordinates (Angstroms) |           |           |
|------------------|------------------|----------------|-------------------------|-----------|-----------|
|                  |                  |                | X                       | Y         | Z         |
| 1                | 5                | 0              | -1.112749               | 0.788170  | -0.018843 |
| 2                | 6                | 0              | -6.012247               | -2.191805 | -0.911834 |
| 3                | 1                | 0              | -5.930214               | -3.105626 | -1.505076 |
| 4                | 1                | 0              | -6.180405               | -2.493654 | 0.128201  |
| 5                | 1                | 0              | -6.899046               | -1.644600 | -1.240105 |
| 6                | 6                | 0              | -4.769489               | -1.350039 | -1.019428 |
| 7                | 6                | 0              | -3.518549               | -1.913266 | -1.260605 |
| 8                | 1                | 0              | -3.449609               | -2.969608 | -1.503125 |
| 9                | 6                | 0              | -2.365795               | 0.233994  | -0.860780 |
| 10               | 6                | 0              | -4.817984               | 0.041656  | -0.998336 |
| 11               | 1                | 0              | -5.782175               | 0.539316  | -1.059892 |
| 12               | 6                | 0              | 0.266411                | 4.441382  | 0.078815  |
| 13               | 1                | 0              | 0.043058                | 5.428847  | -0.316340 |
| 14               | 6                | 0              | 1.528906                | 4.192606  | 0.610999  |
| 15               | 6                | 0              | 1.650551                | 3.036052  | 1.377787  |
| 16               | 1                | 0              | 2.535380                | 2.896721  | 1.991880  |
| 17               | 6                | 0              | -0.514044               | 2.157989  | 0.575361  |
| 18               | 6                | 0              | 2.660380                | 5.174712  | 0.469809  |
| 19               | 1                | 0              | 3.305243                | 5.173026  | 1.351820  |
| 20               | 1                | 0              | 3.286889                | 4.914913  | -0.391034 |
| 21               | 1                | 0              | 2.293645                | 6.191561  | 0.311410  |
| 22               | 6                | 0              | -0.766636               | 3.506352  | 0.144925  |
| 23               | 6                | 0              | -2.345216               | -1.161034 | -1.240390 |
| 24               | 6                | 0              | -1.128577               | -1.876272 | -1.797637 |
| 25               | 1                | 0              | -0.345764               | -1.193691 | -2.115680 |
| 26               | 1                | 0              | -0.695404               | -2.600975 | -1.104888 |
| 27               | 1                | 0              | -1.453547               | -2.433948 | -2.681247 |
| 28               | 6                | 0              | -2.150844               | 4.099728  | 0.020588  |
| 29               | 1                | 0              | -2.192604               | 4.946115  | 0.713538  |
| 30               | 1                | 0              | -2.387479               | 4.494393  | -0.969679 |
| 31               | 1                | 0              | -2.918847               | 3.403180  | 0.332308  |
| 32               | 6                | 0              | 0.656693                | 2.059702  | 1.418330  |
| 33               | 6                | 0              | 0.837877                | 1.021571  | 2.510023  |
| 34               | 1                | 0              | -0.088440               | 0.518825  | 2.772966  |
| 35               | 1                | 0              | 1.586336                | 0.263630  | 2.269040  |
| 36               | 1                | 0              | 1.189616                | 1.544876  | 3.404280  |
| 37               | 6                | 0              | -3.665467               | 0.826621  | -1.026541 |
| 38               | 6                | 0              | -3.883769               | 2.235005  | -1.529083 |
| 39               | 1                | 0              | -4.469496               | 2.869301  | -0.860518 |
| 40               | 1                | 0              | -2.950875               | 2.724872  | -1.777860 |
| 41               | 1                | 0              | -4.453418               | 2.150416  | -2.460072 |
| 42               | 7                | 0              | -0.184980               | -0.366370 | 0.333473  |
| 43               | 6                | 0              | 1.128257                | -0.543686 | -0.114619 |
| 44               | 6                | 0              | -0.480275               | -1.450016 | 1.165292  |
| 45               | 6                | 0              | 1.669176                | -1.737603 | 0.418052  |

|    |   |   |           |           |           |
|----|---|---|-----------|-----------|-----------|
| 46 | 6 | 0 | 1.875890  | 0.234218  | -1.004055 |
| 47 | 6 | 0 | 0.641286  | -2.313886 | 1.255211  |
| 48 | 6 | 0 | 2.966066  | -2.134308 | 0.072551  |
| 49 | 6 | 0 | 3.159531  | -0.184278 | -1.327724 |
| 50 | 1 | 0 | 1.473567  | 1.145566  | -1.429116 |
| 51 | 6 | 0 | 0.583142  | -3.452072 | 2.066583  |
| 52 | 1 | 0 | 3.380144  | -3.050651 | 0.482425  |
| 53 | 1 | 0 | 3.739756  | 0.422475  | -2.014790 |
| 54 | 1 | 0 | 1.436650  | -4.117487 | 2.140156  |
| 55 | 6 | 0 | -1.677184 | -2.846486 | 2.695898  |
| 56 | 1 | 0 | -2.573042 | -3.063720 | 3.267083  |
| 57 | 6 | 0 | -1.643463 | -1.709202 | 1.897769  |
| 58 | 1 | 0 | -2.499919 | -1.048673 | 1.843464  |
| 59 | 6 | 0 | 3.728019  | -1.363185 | -0.800114 |
| 60 | 6 | 0 | 5.139204  | -1.790595 | -1.180538 |
| 61 | 1 | 0 | 5.339852  | -2.726542 | -0.646251 |
| 62 | 6 | 0 | 5.269433  | -2.086138 | -2.685857 |
| 63 | 1 | 0 | 6.272560  | -2.453517 | -2.923750 |
| 64 | 1 | 0 | 4.545390  | -2.841141 | -3.002202 |
| 65 | 1 | 0 | 5.095089  | -1.186540 | -3.283723 |
| 66 | 6 | 0 | 6.196588  | -0.768311 | -0.725359 |
| 67 | 1 | 0 | 6.064608  | 0.191913  | -1.233057 |
| 68 | 1 | 0 | 6.131186  | -0.587676 | 0.350542  |
| 69 | 1 | 0 | 7.205645  | -1.127129 | -0.950932 |
| 70 | 6 | 0 | -0.577769 | -3.715734 | 2.780810  |
| 71 | 1 | 0 | -0.636343 | -4.593057 | 3.414710  |

-----

Compound 2a 1-RF-N-TSb

Method: b3lyp/6-311g(d,p)

SCF Done: E(RB3LYP) = -1359.13230363 A.U. after 1 cycles

Lowest frequency = -68.6670

Zero-point correction= 0.599993  
(Hartree/Particle)  
Thermal correction to Energy= 0.632617  
Thermal correction to Enthalpy= 0.633561  
Thermal correction to Gibbs Free Energy= 0.536690  
Sum of electronic and zero-point Energies= -1358.532311  
Sum of electronic and thermal Energies= -1358.499686  
Sum of electronic and thermal Enthalpies= -1358.498742  
Sum of electronic and thermal Free Energies= -1358.595613

Standard orientation:

| Center<br>Number | Atomic<br>Number | Atomic<br>Type | Coordinates (Angstroms) |           |           |
|------------------|------------------|----------------|-------------------------|-----------|-----------|
|                  |                  |                | X                       | Y         | Z         |
| 1                | 5                | 0              | -1.214047               | 0.704984  | -0.028939 |
| 2                | 6                | 0              | -5.695741               | -2.920722 | -0.698885 |
| 3                | 1                | 0              | -5.516520               | -3.819401 | -1.293868 |
| 4                | 1                | 0              | -5.775236               | -3.234801 | 0.348061  |
| 5                | 1                | 0              | -6.662291               | -2.501428 | -0.987968 |
| 6                | 6                | 0              | -4.584868               | -1.918939 | -0.863208 |
| 7                | 6                | 0              | -3.280342               | -2.309256 | -1.156808 |
| 8                | 1                | 0              | -3.078677               | -3.348600 | -1.398743 |
| 9                | 6                | 0              | -2.414554               | -0.021754 | -0.814462 |
| 10               | 6                | 0              | -4.821336               | -0.546599 | -0.844533 |
| 11               | 1                | 0              | -5.846027               | -0.185093 | -0.865643 |



|    |   |   |           |           |           |
|----|---|---|-----------|-----------|-----------|
| 12 | 6 | 0 | -0.342324 | 4.512357  | -0.004363 |
| 13 | 1 | 0 | -0.714550 | 5.456533  | -0.393079 |
| 14 | 6 | 0 | 0.963665  | 4.442415  | 0.473661  |
| 15 | 6 | 0 | 1.273925  | 3.320513  | 1.238821  |
| 16 | 1 | 0 | 2.194545  | 3.308710  | 1.814837  |
| 17 | 6 | 0 | -0.782925 | 2.148966  | 0.533942  |
| 18 | 6 | 0 | 1.944032  | 5.567621  | 0.280040  |
| 19 | 1 | 0 | 2.619929  | 5.661770  | 1.133327  |
| 20 | 1 | 0 | 2.562916  | 5.387059  | -0.606210 |
| 21 | 1 | 0 | 1.436072  | 6.523769  | 0.134013  |
| 22 | 6 | 0 | -1.234717 | 3.446351  | 0.109888  |
| 23 | 6 | 0 | -2.220564 | -1.404468 | -1.189961 |
| 24 | 6 | 0 | -0.942514 | -1.952600 | -1.796879 |
| 25 | 1 | 0 | -0.273543 | -1.172800 | -2.149373 |
| 26 | 1 | 0 | -0.386534 | -2.606506 | -1.121600 |
| 27 | 1 | 0 | -1.225463 | -2.556199 | -2.664638 |
| 28 | 6 | 0 | -2.690862 | 3.844914  | 0.043812  |
| 29 | 1 | 0 | -2.818041 | 4.683743  | 0.735553  |
| 30 | 1 | 0 | -3.020835 | 4.195180  | -0.936398 |
| 31 | 1 | 0 | -3.342926 | 3.053168  | 0.390399  |
| 32 | 6 | 0 | 0.424816  | 2.218687  | 1.325935  |
| 33 | 6 | 0 | 0.791519  | 1.225239  | 2.412625  |
| 34 | 1 | 0 | -0.045297 | 0.602627  | 2.715958  |
| 35 | 1 | 0 | 1.626595  | 0.575078  | 2.143054  |
| 36 | 1 | 0 | 1.104492  | 1.800024  | 3.289531  |
| 37 | 6 | 0 | -3.788632 | 0.387375  | -0.925567 |
| 38 | 6 | 0 | -4.217801 | 1.748198  | -1.423316 |
| 39 | 1 | 0 | -4.855530 | 2.303378  | -0.732326 |
| 40 | 1 | 0 | -3.371716 | 2.357896  | -1.714162 |
| 41 | 1 | 0 | -4.809658 | 1.578044  | -2.328385 |
| 42 | 7 | 0 | -0.124246 | -0.309808 | 0.287750  |
| 43 | 6 | 0 | 1.181047  | -0.311691 | -0.215918 |
| 44 | 6 | 0 | -0.235027 | -1.415854 | 1.135281  |
| 45 | 6 | 0 | 1.901315  | -1.417912 | 0.298496  |
| 46 | 6 | 0 | 1.778258  | 0.549835  | -1.138291 |
| 47 | 6 | 0 | 0.995457  | -2.119585 | 1.180963  |
| 48 | 6 | 0 | 3.222558  | -1.641936 | -0.097552 |
| 49 | 6 | 0 | 3.094178  | 0.301967  | -1.512796 |
| 50 | 1 | 0 | 1.240918  | 1.394782  | -1.550944 |
| 51 | 6 | 0 | 1.125512  | -3.247503 | 1.997813  |
| 52 | 1 | 0 | 3.764177  | -2.492742 | 0.303339  |
| 53 | 1 | 0 | 3.567008  | 0.969656  | -2.226249 |
| 54 | 1 | 0 | 2.063530  | -3.790859 | 2.037654  |
| 55 | 6 | 0 | -1.167865 | -2.947451 | 2.719554  |
| 56 | 1 | 0 | -2.001916 | -3.278508 | 3.328472  |
| 57 | 6 | 0 | -1.321216 | -1.823187 | 1.916823  |
| 58 | 1 | 0 | -2.260782 | -1.285114 | 1.896095  |
| 59 | 6 | 0 | 3.837345  | -0.781772 | -1.006755 |
| 60 | 6 | 0 | 5.276154  | -0.999147 | -1.458252 |
| 61 | 1 | 0 | 5.508624  | -0.198845 | -2.170355 |
| 62 | 6 | 0 | 6.273078  | -0.876616 | -0.291487 |
| 63 | 1 | 0 | 7.303245  | -0.971715 | -0.648727 |
| 64 | 1 | 0 | 6.173835  | 0.088782  | 0.211162  |
| 65 | 1 | 0 | 6.106569  | -1.658937 | 0.455112  |
| 66 | 6 | 0 | 5.456055  | -2.336406 | -2.199358 |
| 67 | 1 | 0 | 5.255719  | -3.185543 | -1.539101 |
| 68 | 1 | 0 | 4.774447  | -2.409270 | -3.050519 |
| 69 | 1 | 0 | 6.480143  | -2.439452 | -2.571499 |
| 70 | 6 | 0 | 0.041428  | -3.659353 | 2.761335  |
| 71 | 1 | 0 | 0.128415  | -4.530763 | 3.400082  |

-----  
Compound 2a 2-RF-CC-TSa

Method: b3lyp/6-311g(d,p)

SCF Done: E(RB3LYP) = -1359.21462189 A.U. after 1 cycles

Lowest frequency = -60.4223

Zero-point correction= 0.599943  
(Hartree/Particle)  
Thermal correction to Energy= 0.633611  
Thermal correction to Enthalpy= 0.634555  
Thermal correction to Gibbs Free Energy= 0.533460  
Sum of electronic and zero-point Energies= -1358.614679  
Sum of electronic and thermal Energies= -1358.581011  
Sum of electronic and thermal Enthalpies= -1358.580067  
Sum of electronic and thermal Free Energies= -1358.681162

Standard orientation:

-----

| Center<br>Number | Atomic<br>Number | Atomic<br>Type | Coordinates (Angstroms) |           |           |
|------------------|------------------|----------------|-------------------------|-----------|-----------|
|                  |                  |                | X                       | Y         | Z         |
| 1                | 5                | 0              | -0.884899               | 0.117398  | -0.000038 |
| 2                | 6                | 0              | -0.751722               | 6.084708  | -0.000210 |
| 3                | 1                | 0              | -1.794210               | 6.422062  | -0.000249 |
| 4                | 1                | 0              | -0.272043               | 6.510146  | 0.884693  |
| 5                | 1                | 0              | -0.271993               | 6.510094  | -0.885111 |
| 6                | 6                | 0              | -0.673953               | 4.578065  | -0.000163 |
| 7                | 6                | 0              | -0.621779               | 3.851973  | 1.185644  |
| 8                | 1                | 0              | -0.568478               | 4.385117  | 2.131278  |
| 9                | 6                | 0              | -0.668286               | 1.713985  | -0.000078 |
| 10               | 6                | 0              | -0.621700               | 3.851902  | -1.185923 |
| 11               | 1                | 0              | -0.568336               | 4.384991  | -2.131585 |
| 12               | 6                | 0              | -4.514001               | -0.777044 | -1.186354 |
| 13               | 1                | 0              | -5.032348               | -0.916247 | -2.131694 |
| 14               | 6                | 0              | -5.240162               | -0.828478 | -0.000165 |
| 15               | 6                | 0              | -4.514086               | -0.776971 | 1.186073  |
| 16               | 1                | 0              | -5.032499               | -0.916115 | 2.131385  |
| 17               | 6                | 0              | -2.411114               | -0.396015 | -0.000078 |
| 18               | 6                | 0              | -6.742137               | -0.970381 | -0.000214 |
| 19               | 1                | 0              | -7.093495               | -1.506732 | 0.884676  |
| 20               | 1                | 0              | -7.227208               | 0.012125  | -0.000257 |
| 21               | 1                | 0              | -7.093433               | -1.506778 | -0.885100 |
| 22               | 7                | 0              | 0.226829                | -0.794540 | 0.000029  |
| 23               | 6                | 0              | 0.172071                | -2.230115 | 0.000076  |
| 24               | 6                | 0              | 1.625239                | -0.462816 | 0.000069  |
| 25               | 6                | 0              | 1.479281                | -2.757600 | 0.000145  |
| 26               | 6                | 0              | -0.926884               | -3.090428 | 0.000062  |
| 27               | 6                | 0              | 2.396681                | -1.638874 | 0.000141  |
| 28               | 6                | 0              | 1.696102                | -4.136406 | 0.000201  |
| 29               | 6                | 0              | -0.694924               | -4.464453 | 0.000119  |
| 30               | 1                | 0              | -1.937616               | -2.717357 | 0.000010  |
| 31               | 6                | 0              | 3.791599                | -1.584111 | 0.000191  |
| 32               | 6                | 0              | 0.600913                | -4.990045 | 0.000188  |
| 33               | 1                | 0              | 2.705514                | -4.532180 | 0.000254  |
| 34               | 1                | 0              | -1.545765               | -5.136342 | 0.000108  |
| 35               | 6                | 0              | 4.443417                | -0.353938 | 0.000171  |
| 36               | 1                | 0              | 4.369685                | -2.502773 | 0.000247  |
| 37               | 1                | 0              | 0.748339                | -6.063925 | 0.000231  |

-----

|    |   |   |           |           |           |
|----|---|---|-----------|-----------|-----------|
| 38 | 6 | 0 | 3.656150  | 0.810514  | 0.000098  |
| 39 | 1 | 0 | 4.140182  | 1.781096  | 0.000080  |
| 40 | 6 | 0 | 2.264843  | 0.777859  | 0.000047  |
| 41 | 1 | 0 | 1.710861  | 1.701940  | -0.000009 |
| 42 | 6 | 0 | 5.963698  | -0.280152 | 0.000226  |
| 43 | 1 | 0 | 6.330402  | -1.313117 | 0.000281  |
| 44 | 6 | 0 | 6.507351  | 0.400094  | -1.269272 |
| 45 | 1 | 0 | 7.601349  | 0.382764  | -1.277958 |
| 46 | 1 | 0 | 6.151083  | -0.104999 | -2.170527 |
| 47 | 1 | 0 | 6.191193  | 1.445862  | -1.325931 |
| 48 | 6 | 0 | 6.507255  | 0.400196  | 1.269709  |
| 49 | 1 | 0 | 6.191093  | 1.445970  | 1.326260  |
| 50 | 1 | 0 | 6.150919  | -0.104824 | 2.170979  |
| 51 | 1 | 0 | 7.601252  | 0.382867  | 1.278480  |
| 52 | 6 | 0 | -3.129889 | -0.588179 | -1.206626 |
| 53 | 6 | 0 | -0.601371 | 2.455001  | 1.206609  |
| 54 | 6 | 0 | -0.405882 | 1.812238  | 2.563802  |
| 55 | 1 | 0 | -1.338682 | 1.752293  | 3.128965  |
| 56 | 1 | 0 | 0.013181  | 0.809142  | 2.493153  |
| 57 | 1 | 0 | 0.290690  | 2.410298  | 3.156820  |
| 58 | 6 | 0 | -2.457153 | -0.734187 | -2.556368 |
| 59 | 1 | 0 | -2.803773 | -1.654521 | -3.035369 |
| 60 | 1 | 0 | -2.701989 | 0.088795  | -3.232572 |
| 61 | 1 | 0 | -1.374046 | -0.804091 | -2.481715 |
| 62 | 6 | 0 | -3.129975 | -0.588105 | 1.206432  |
| 63 | 6 | 0 | -2.457335 | -0.734033 | 2.556230  |
| 64 | 1 | 0 | -1.374221 | -0.803915 | 2.481660  |
| 65 | 1 | 0 | -2.702240 | 0.088975  | 3.232376  |
| 66 | 1 | 0 | -2.803968 | -1.654352 | 3.035248  |
| 67 | 6 | 0 | -0.601290 | 2.454930  | -1.206803 |
| 68 | 6 | 0 | -0.405707 | 1.812086  | -2.563945 |
| 69 | 1 | 0 | 0.013326  | 0.808984  | -2.493208 |
| 70 | 1 | 0 | -1.338463 | 1.752133  | -3.129180 |
| 71 | 1 | 0 | 0.290926  | 2.410097  | -3.156940 |

-----

Compound 2a 2-RF-CC-TSb

Method: b3lyp/6-311g(d,p)

SCF Done: E(RB3LYP) = -1359.21448733 A.U. after 1 cycles

Lowest frequency = -58.2549

Zero-point correction= 0.599961  
(Hartree/Particle)  
Thermal correction to Energy= 0.633616  
Thermal correction to Enthalpy= 0.634560  
Thermal correction to Gibbs Free Energy= 0.533600  
Sum of electronic and zero-point Energies= -1358.614526  
Sum of electronic and thermal Energies= -1358.580871  
Sum of electronic and thermal Enthalpies= -1358.579927  
Sum of electronic and thermal Free Energies= -1358.680887

Standard orientation:

| Center<br>Number | Atomic<br>Number | Atomic<br>Type | Coordinates (Angstroms) |          |          |
|------------------|------------------|----------------|-------------------------|----------|----------|
|                  |                  |                | X                       | Y        | Z        |
| 1                | 5                | 0              | 0.909449                | 0.092190 | 0.000038 |
| 2                | 6                | 0              | 1.552036                | 6.026477 | 0.000225 |
| 3                | 1                | 0              | 2.629446                | 6.225932 | 0.000280 |

|    |   |   |           |           |           |
|----|---|---|-----------|-----------|-----------|
| 4  | 1 | 0 | 1.131524  | 6.510479  | -0.884678 |
| 5  | 1 | 0 | 1.131444  | 6.510432  | 0.885116  |
| 6  | 6 | 0 | 1.279620  | 4.542617  | 0.000174  |
| 7  | 6 | 0 | 1.133860  | 3.829462  | -1.185657 |
| 8  | 1 | 0 | 1.150502  | 4.365015  | -2.131284 |
| 9  | 6 | 0 | 0.901790  | 1.703665  | 0.000081  |
| 10 | 6 | 0 | 1.133763  | 3.829398  | 1.185954  |
| 11 | 1 | 0 | 1.150328  | 4.364900  | 2.131611  |
| 12 | 6 | 0 | 4.392527  | -1.262928 | 1.186368  |
| 13 | 1 | 0 | 4.888617  | -1.467823 | 2.131699  |
| 14 | 6 | 0 | 5.106166  | -1.406851 | 0.000167  |
| 15 | 6 | 0 | 4.392622  | -1.262866 | -1.186084 |
| 16 | 1 | 0 | 4.888788  | -1.467710 | -2.131387 |
| 17 | 6 | 0 | 2.356134  | -0.614435 | 0.000078  |
| 18 | 6 | 0 | 6.577520  | -1.740206 | 0.000217  |
| 19 | 1 | 0 | 6.857186  | -2.317184 | -0.884678 |
| 20 | 1 | 0 | 7.184564  | -0.828010 | 0.000260  |
| 21 | 1 | 0 | 6.857118  | -2.317224 | 0.885108  |
| 22 | 7 | 0 | -0.311006 | -0.667779 | -0.000032 |
| 23 | 6 | 0 | -0.443327 | -2.098470 | -0.000072 |
| 24 | 6 | 0 | -1.654465 | -0.156620 | -0.000073 |
| 25 | 6 | 0 | -1.807649 | -2.452173 | -0.000134 |
| 26 | 6 | 0 | 0.534834  | -3.093995 | -0.000057 |
| 27 | 6 | 0 | -2.573463 | -1.224015 | -0.000135 |
| 28 | 6 | 0 | -2.201189 | -3.791129 | -0.000181 |
| 29 | 6 | 0 | 0.126871  | -4.426441 | -0.000105 |
| 30 | 1 | 0 | 1.585423  | -2.855267 | -0.000010 |
| 31 | 6 | 0 | -3.947932 | -0.992380 | -0.000184 |
| 32 | 6 | 0 | -1.226020 | -4.779712 | -0.000167 |
| 33 | 1 | 0 | -3.253359 | -4.052907 | -0.000229 |
| 34 | 1 | 0 | 0.883560  | -5.202834 | -0.000095 |
| 35 | 6 | 0 | -4.435155 | 0.314809  | -0.000173 |
| 36 | 1 | 0 | -4.631843 | -1.834462 | -0.000231 |
| 37 | 1 | 0 | -1.511483 | -5.825388 | -0.000203 |
| 38 | 6 | 0 | -3.504786 | 1.364494  | -0.000112 |
| 39 | 1 | 0 | -3.868528 | 2.387011  | -0.000103 |
| 40 | 6 | 0 | -2.126899 | 1.154537  | -0.000062 |
| 41 | 1 | 0 | -1.459197 | 2.000092  | -0.000016 |
| 42 | 6 | 0 | -5.929114 | 0.607961  | -0.000226 |
| 43 | 1 | 0 | -6.037558 | 1.698493  | -0.000203 |
| 44 | 6 | 0 | -6.620091 | 0.077847  | -1.269607 |
| 45 | 1 | 0 | -7.677859 | 0.357565  | -1.279075 |
| 46 | 1 | 0 | -6.152438 | 0.481460  | -2.171075 |
| 47 | 1 | 0 | -6.564620 | -1.013426 | -1.325334 |
| 48 | 6 | 0 | -6.620194 | 0.077783  | 1.269073  |
| 49 | 1 | 0 | -6.564727 | -1.013492 | 1.324750  |
| 50 | 1 | 0 | -6.152614 | 0.481351  | 2.170599  |
| 51 | 1 | 0 | -7.677962 | 0.357501  | 1.278470  |
| 52 | 6 | 0 | 3.044132  | -0.897874 | 1.206633  |
| 53 | 6 | 0 | 0.932262  | 2.446969  | -1.206619 |
| 54 | 6 | 0 | 0.655828  | 1.834839  | -2.563879 |
| 55 | 1 | 0 | 1.573444  | 1.654646  | -3.128326 |
| 56 | 1 | 0 | 0.110534  | 0.894364  | -2.493447 |
| 57 | 1 | 0 | 0.042932  | 2.517967  | -3.157384 |
| 58 | 6 | 0 | 2.357652  | -0.957011 | 2.556068  |
| 59 | 1 | 0 | 2.584208  | -1.913901 | 3.035270  |
| 60 | 1 | 0 | 2.704568  | -0.171772 | 3.232460  |
| 61 | 1 | 0 | 1.274451  | -0.888808 | 2.480571  |
| 62 | 6 | 0 | 3.044229  | -0.897810 | -1.206438 |
| 63 | 6 | 0 | 2.357857  | -0.956875 | -2.555930 |

|    |   |   |          |           |           |
|----|---|---|----------|-----------|-----------|
| 64 | 1 | 0 | 1.274649 | -0.888682 | -2.480515 |
| 65 | 1 | 0 | 2.704821 | -0.171595 | -3.232250 |
| 66 | 1 | 0 | 2.584457 | -1.913736 | -3.035169 |
| 67 | 6 | 0 | 0.932164 | 2.446904  | 1.206825  |
| 68 | 6 | 0 | 0.655620 | 1.834700  | 2.564028  |
| 69 | 1 | 0 | 0.110321 | 0.894235  | 2.493502  |
| 70 | 1 | 0 | 1.573191 | 1.654464  | 3.128535  |
| 71 | 1 | 0 | 0.042686 | 2.517800  | 3.157527  |

-----

Compound 2a 2-RF-CN-TSa

Method: b3lyp/6-311g(d,p)

SCF Done: E(RB3LYP) = -1359.19619590 A.U. after 1 cycles

Lowest frequency = -39.0984

Zero-point correction= 0.599970  
(Hartree/Particle)  
Thermal correction to Energy= 0.633291  
Thermal correction to Enthalpy= 0.634235  
Thermal correction to Gibbs Free Energy= 0.534611  
Sum of electronic and zero-point Energies= -1358.596225  
Sum of electronic and thermal Energies= -1358.562905  
Sum of electronic and thermal Enthalpies= -1358.561961  
Sum of electronic and thermal Free Energies= -1358.661585

Standard orientation:

| Center<br>Number | Atomic<br>Number | Atomic<br>Type | Coordinates (Angstroms) |           |           |
|------------------|------------------|----------------|-------------------------|-----------|-----------|
|                  |                  |                | X                       | Y         | Z         |
| 1                | 5                | 0              | 1.102454                | -0.025810 | -0.008633 |
| 2                | 6                | 0              | 4.835373                | -4.510216 | -1.116243 |
| 3                | 1                | 0              | 4.309988                | -5.458415 | -1.248204 |
| 4                | 1                | 0              | 5.442219                | -4.324052 | -2.005181 |
| 5                | 1                | 0              | 5.522334                | -4.630707 | -0.271078 |
| 6                | 6                | 0              | 3.874866                | -3.378935 | -0.858390 |
| 7                | 6                | 0              | 2.643415                | -3.602413 | -0.250919 |
| 8                | 1                | 0              | 2.369487                | -4.618463 | 0.014100  |
| 9                | 6                | 0              | 2.068821                | -1.213194 | -0.310130 |
| 10               | 6                | 0              | 4.197529                | -2.068281 | -1.198613 |
| 11               | 1                | 0              | 5.149519                | -1.872413 | -1.681527 |
| 12               | 6                | 0              | 1.009414                | 3.481170  | -1.746437 |
| 13               | 1                | 0              | 0.672235                | 3.892402  | -2.694326 |
| 14               | 6                | 0              | 1.531789                | 4.338228  | -0.781947 |
| 15               | 6                | 0              | 2.031812                | 3.757296  | 0.380064  |
| 16               | 1                | 0              | 2.508519                | 4.388530  | 1.125438  |
| 17               | 6                | 0              | 1.358061                | 1.522617  | -0.332681 |
| 18               | 6                | 0              | 1.568888                | 5.831778  | -0.993568 |
| 19               | 1                | 0              | 2.412578                | 6.288924  | -0.470766 |
| 20               | 1                | 0              | 1.648963                | 6.083660  | -2.053876 |
| 21               | 1                | 0              | 0.655514                | 6.303159  | -0.614052 |
| 22               | 7                | 0              | -0.239419               | -0.281122 | 0.665825  |
| 23               | 6                | 0              | -0.515742               | -0.113097 | 2.027823  |
| 24               | 6                | 0              | -1.477687               | -0.373214 | 0.016279  |
| 25               | 6                | 0              | -1.917152               | -0.017508 | 2.234527  |
| 26               | 6                | 0              | 0.356015                | -0.142736 | 3.121450  |
| 27               | 6                | 0              | -2.532869               | -0.185029 | 0.941897  |
| 28               | 6                | 0              | -2.428303               | 0.130134  | 3.526885  |
| 29               | 6                | 0              | -0.175115               | -0.000522 | 4.398989  |

|    |   |   |           |           |           |
|----|---|---|-----------|-----------|-----------|
| 30 | 1 | 0 | 1.417307  | -0.299921 | 2.991346  |
| 31 | 6 | 0 | -3.863266 | -0.260571 | 0.518665  |
| 32 | 6 | 0 | -1.553884 | 0.152436  | 4.605170  |
| 33 | 1 | 0 | -3.498330 | 0.209426  | 3.685692  |
| 34 | 1 | 0 | 0.493145  | -0.024107 | 5.252731  |
| 35 | 6 | 0 | -4.166104 | -0.551157 | -0.808392 |
| 36 | 1 | 0 | -4.666892 | -0.107941 | 1.232716  |
| 37 | 1 | 0 | -1.937243 | 0.262309  | 5.612945  |
| 38 | 6 | 0 | -3.100783 | -0.793217 | -1.698934 |
| 39 | 1 | 0 | -3.318310 | -1.063228 | -2.726870 |
| 40 | 6 | 0 | -1.769864 | -0.718192 | -1.306959 |
| 41 | 1 | 0 | -0.987194 | -0.951448 | -2.014976 |
| 42 | 6 | 0 | -5.613389 | -0.633130 | -1.274072 |
| 43 | 1 | 0 | -6.238199 | -0.413570 | -0.400560 |
| 44 | 6 | 0 | -5.935617 | 0.424782  | -2.345114 |
| 45 | 1 | 0 | -6.995456 | 0.392193  | -2.616056 |
| 46 | 1 | 0 | -5.705755 | 1.430913  | -1.985732 |
| 47 | 1 | 0 | -5.354537 | 0.255768  | -3.256759 |
| 48 | 6 | 0 | -5.988168 | -2.044636 | -1.761429 |
| 49 | 1 | 0 | -5.410751 | -2.325956 | -2.647223 |
| 50 | 1 | 0 | -5.795766 | -2.791934 | -0.987547 |
| 51 | 1 | 0 | -7.048507 | -2.093692 | -2.027826 |
| 52 | 6 | 0 | 0.925411  | 2.100993  | -1.549575 |
| 53 | 6 | 0 | 1.742871  | -2.574633 | 0.029964  |
| 54 | 6 | 0 | 0.456707  | -3.029225 | 0.691456  |
| 55 | 1 | 0 | 0.315935  | -2.585398 | 1.677331  |
| 56 | 1 | 0 | -0.425653 | -2.786014 | 0.099158  |
| 57 | 1 | 0 | 0.480522  | -4.113017 | 0.818354  |
| 58 | 6 | 0 | 0.424093  | 1.276007  | -2.717426 |
| 59 | 1 | 0 | 0.787170  | 1.697404  | -3.658754 |
| 60 | 1 | 0 | 0.770399  | 0.241020  | -2.671717 |
| 61 | 1 | 0 | -0.667157 | 1.261813  | -2.765348 |
| 62 | 6 | 0 | 1.965298  | 2.381896  | 0.613783  |
| 63 | 6 | 0 | 2.631024  | 1.873136  | 1.876235  |
| 64 | 1 | 0 | 1.980120  | 1.975915  | 2.747477  |
| 65 | 1 | 0 | 2.920605  | 0.822909  | 1.796967  |
| 66 | 1 | 0 | 3.540489  | 2.445373  | 2.078351  |
| 67 | 6 | 0 | 3.343067  | -0.996990 | -0.945218 |
| 68 | 6 | 0 | 3.868849  | 0.352043  | -1.390439 |
| 69 | 1 | 0 | 3.218126  | 0.832849  | -2.120641 |
| 70 | 1 | 0 | 3.975023  | 1.052160  | -0.561820 |
| 71 | 1 | 0 | 4.851050  | 0.226731  | -1.849571 |

-----

Compound 2a 2-RF-CN-TSa excited state

Method: cam-b3lyp/6-31G(d)  
 SCF Done: E(RCAM-B3LYP) = -1358.06569338 A.U. after 1 cycles  
 Lowest frequency = -25.8459

Zero-point correction= 0.610207  
 (Hartree/Particle)  
 Thermal correction to Energy= 0.642946  
 Thermal correction to Enthalpy= 0.643890  
 Thermal correction to Gibbs Free Energy= 0.545304  
 Sum of electronic and zero-point Energies= -1357.348407  
 Sum of electronic and thermal Energies= -1357.315669  
 Sum of electronic and thermal Enthalpies= -1357.314724  
 Sum of electronic and thermal Free Energies= -1357.413311

## Standard orientation:

| Center<br>Number | Atomic<br>Number | Atomic<br>Type | Coordinates (Angstroms) |           |           |
|------------------|------------------|----------------|-------------------------|-----------|-----------|
|                  |                  |                | X                       | Y         | Z         |
| 1                | 5                | 0              | 1.143555                | -0.000576 | -0.033973 |
| 2                | 6                | 0              | 5.126884                | -4.299396 | -1.043957 |
| 3                | 1                | 0              | 6.061583                | -4.111095 | -0.501847 |
| 4                | 1                | 0              | 4.756956                | -5.280085 | -0.730327 |
| 5                | 1                | 0              | 5.386923                | -4.367537 | -2.106882 |
| 6                | 6                | 0              | 4.104669                | -3.224191 | -0.787017 |
| 7                | 6                | 0              | 2.894889                | -3.489174 | -0.162494 |
| 8                | 1                | 0              | 2.679579                | -4.510903 | 0.145086  |
| 9                | 6                | 0              | 2.152431                | -1.139796 | -0.286638 |
| 10               | 6                | 0              | 4.327744                | -1.899357 | -1.165290 |
| 11               | 1                | 0              | 5.263801                | -1.648810 | -1.661853 |
| 12               | 6                | 0              | 0.648544                | 3.467070  | -1.838855 |
| 13               | 1                | 0              | 0.262730                | 3.821505  | -2.792981 |
| 14               | 6                | 0              | 1.090089                | 4.394222  | -0.902452 |
| 15               | 6                | 0              | 1.657904                | 3.895931  | 0.263933  |
| 16               | 1                | 0              | 2.077280                | 4.592466  | 0.987639  |
| 17               | 6                | 0              | 1.211593                | 1.578106  | -0.386552 |
| 18               | 6                | 0              | 0.977186                | 5.875341  | -1.150370 |
| 19               | 1                | 0              | 1.023788                | 6.106794  | -2.218517 |
| 20               | 1                | 0              | 0.024414                | 6.267525  | -0.774848 |
| 21               | 1                | 0              | 1.775615                | 6.427289  | -0.645869 |
| 22               | 7                | 0              | -0.203280               | -0.254040 | 0.671909  |
| 23               | 6                | 0              | -0.476889               | -0.058671 | 2.036616  |
| 24               | 6                | 0              | -1.437628               | -0.453457 | 0.054722  |
| 25               | 6                | 0              | -1.867788               | -0.017816 | 2.265393  |
| 26               | 6                | 0              | 0.431488                | -0.004967 | 3.084221  |
| 27               | 6                | 0              | -2.495482               | -0.277109 | 0.971235  |
| 28               | 6                | 0              | -2.356888               | 0.157954  | 3.542433  |
| 29               | 6                | 0              | -0.073602               | 0.162734  | 4.375108  |
| 30               | 1                | 0              | 1.490931                | -0.118399 | 2.903681  |
| 31               | 6                | 0              | -3.802003               | -0.434966 | 0.564064  |
| 32               | 6                | 0              | -1.442009               | 0.261232  | 4.599724  |
| 33               | 1                | 0              | -3.423984               | 0.198314  | 3.734221  |
| 34               | 1                | 0              | 0.613917                | 0.208636  | 5.212451  |
| 35               | 6                | 0              | -4.076562               | -0.805943 | -0.764597 |
| 36               | 1                | 0              | -4.622253               | -0.292369 | 1.261256  |
| 37               | 1                | 0              | -1.811099               | 0.397054  | 5.610582  |
| 38               | 6                | 0              | -3.010451               | -1.031661 | -1.642680 |
| 39               | 1                | 0              | -3.215103               | -1.354135 | -2.658103 |
| 40               | 6                | 0              | -1.686940               | -0.864608 | -1.251799 |
| 41               | 1                | 0              | -0.871061               | -1.075175 | -1.928415 |
| 42               | 6                | 0              | -5.510975               | -0.980451 | -1.221378 |
| 43               | 1                | 0              | -6.152909               | -0.755661 | -0.361990 |
| 44               | 6                | 0              | -5.867649               | 0.006471  | -2.340169 |
| 45               | 1                | 0              | -6.922780               | -0.095573 | -2.612106 |
| 46               | 1                | 0              | -5.693409               | 1.040671  | -2.029048 |
| 47               | 1                | 0              | -5.271474               | -0.180508 | -3.239273 |
| 48               | 6                | 0              | -5.795839               | -2.425621 | -1.649575 |
| 49               | 1                | 0              | -5.199652               | -2.706418 | -2.523836 |
| 50               | 1                | 0              | -5.568227               | -3.131335 | -0.845272 |
| 51               | 1                | 0              | -6.851264               | -2.539389 | -1.915623 |
| 52               | 6                | 0              | 0.706245                | 2.093050  | -1.606756 |
| 53               | 6                | 0              | 1.935936                | -2.508722 | 0.090800  |
| 54               | 6                | 0              | 0.679147                | -2.995797 | 0.773484  |
| 55               | 1                | 0              | 0.509499                | -2.515588 | 1.741901  |

|    |   |   |           |           |           |
|----|---|---|-----------|-----------|-----------|
| 56 | 1 | 0 | -0.218812 | -2.832626 | 0.169736  |
| 57 | 1 | 0 | 0.746063  | -4.071463 | 0.959877  |
| 58 | 6 | 0 | 0.283235  | 1.204285  | -2.752221 |
| 59 | 1 | 0 | 0.582336  | 1.650474  | -3.706142 |
| 60 | 1 | 0 | 0.741469  | 0.215623  | -2.681716 |
| 61 | 1 | 0 | -0.803183 | 1.071573  | -2.791638 |
| 62 | 6 | 0 | 1.731292  | 2.528368  | 0.528004  |
| 63 | 6 | 0 | 2.463919  | 2.130055  | 1.787024  |
| 64 | 1 | 0 | 1.819308  | 2.174478  | 2.671244  |
| 65 | 1 | 0 | 2.864265  | 1.116856  | 1.712774  |
| 66 | 1 | 0 | 3.299475  | 2.813418  | 1.969409  |
| 67 | 6 | 0 | 3.412216  | -0.883126 | -0.939114 |
| 68 | 6 | 0 | 3.822064  | 0.490387  | -1.418475 |
| 69 | 1 | 0 | 3.126158  | 0.900306  | -2.155294 |
| 70 | 1 | 0 | 3.873053  | 1.219036  | -0.605017 |
| 71 | 1 | 0 | 4.810633  | 0.443943  | -1.884987 |

-----

Compound 2a 2-RF-CN-TSb

Method: b3lyp/6-311g(d,p)

SCF Done: E(RB3LYP) = -1359.19597045 A.U. after 1 cycles

Lowest frequency = -39.0870

Zero-point correction= 0.599954  
(Hartree/Particle)  
Thermal correction to Energy= 0.633275  
Thermal correction to Enthalpy= 0.634220  
Thermal correction to Gibbs Free Energy= 0.534403  
Sum of electronic and zero-point Energies= -1358.596017  
Sum of electronic and thermal Energies= -1358.562695  
Sum of electronic and thermal Enthalpies= -1358.561751  
Sum of electronic and thermal Free Energies= -1358.661568

Standard orientation:

| Center<br>Number | Atomic<br>Number | Atomic<br>Type | Coordinates (Angstroms) |           |           |
|------------------|------------------|----------------|-------------------------|-----------|-----------|
|                  |                  |                | X                       | Y         | Z         |
| 1                | 5                | 0              | 1.137076                | -0.018486 | -0.006587 |
| 2                | 6                | 0              | 5.062242                | -4.357199 | -1.026070 |
| 3                | 1                | 0              | 4.573795                | -5.309126 | -1.244699 |
| 4                | 1                | 0              | 5.731822                | -4.113512 | -1.853948 |
| 5                | 1                | 0              | 5.683694                | -4.504367 | -0.135632 |
| 6                | 6                | 0              | 4.055178                | -3.261899 | -0.791526 |
| 7                | 6                | 0              | 2.787476                | -3.542559 | -0.291872 |
| 8                | 1                | 0              | 2.521443                | -4.576162 | -0.095570 |
| 9                | 6                | 0              | 2.155462                | -1.167214 | -0.285850 |
| 10               | 6                | 0              | 4.367954                | -1.929324 | -1.044791 |
| 11               | 1                | 0              | 5.348565                | -1.688624 | -1.442697 |
| 12               | 6                | 0              | 1.080362                | 3.563228  | -1.585828 |
| 13               | 1                | 0              | 0.804616                | 4.010505  | -2.537256 |
| 14               | 6                | 0              | 1.505185                | 4.386104  | -0.546534 |
| 15               | 6                | 0              | 1.931668                | 3.763210  | 0.623005  |
| 16               | 1                | 0              | 2.333464                | 4.369805  | 1.430391  |
| 17               | 6                | 0              | 1.374423                | 1.549241  | -0.239206 |
| 18               | 6                | 0              | 1.517854                | 5.888384  | -0.687413 |
| 19               | 1                | 0              | 2.306851                | 6.340292  | -0.081294 |
| 20               | 1                | 0              | 1.671226                | 6.191355  | -1.726067 |
| 21               | 1                | 0              | 0.565946                | 6.319908  | -0.358568 |



|    |   |   |           |           |           |
|----|---|---|-----------|-----------|-----------|
| 22 | 7 | 0 | -0.245307 | -0.337117 | 0.548548  |
| 23 | 6 | 0 | -0.630244 | -0.236044 | 1.890871  |
| 24 | 6 | 0 | -1.426781 | -0.428503 | -0.199806 |
| 25 | 6 | 0 | -2.044964 | -0.180147 | 1.991962  |
| 26 | 6 | 0 | 0.155539  | -0.295668 | 3.046547  |
| 27 | 6 | 0 | -2.556058 | -0.303625 | 0.648832  |
| 28 | 6 | 0 | -2.657340 | -0.101689 | 3.245452  |
| 29 | 6 | 0 | -0.475490 | -0.222218 | 4.283982  |
| 30 | 1 | 0 | 1.227299  | -0.423965 | 2.992549  |
| 31 | 6 | 0 | -3.847047 | -0.388052 | 0.124475  |
| 32 | 6 | 0 | -1.869196 | -0.108611 | 4.388782  |
| 33 | 1 | 0 | -3.738071 | -0.053037 | 3.323884  |
| 34 | 1 | 0 | 0.125743  | -0.269412 | 5.185265  |
| 35 | 6 | 0 | -4.039789 | -0.625762 | -1.236192 |
| 36 | 1 | 0 | -4.699631 | -0.283846 | 0.787779  |
| 37 | 1 | 0 | -2.331517 | -0.052318 | 5.367404  |
| 38 | 6 | 0 | -2.905435 | -0.804868 | -2.048139 |
| 39 | 1 | 0 | -3.046779 | -1.032099 | -3.100179 |
| 40 | 6 | 0 | -1.607581 | -0.720610 | -1.553296 |
| 41 | 1 | 0 | -0.768736 | -0.905978 | -2.209192 |
| 42 | 6 | 0 | -5.436029 | -0.718708 | -1.838039 |
| 43 | 1 | 0 | -5.306936 | -0.930214 | -2.905859 |
| 44 | 6 | 0 | -6.252598 | -1.877625 | -1.238112 |
| 45 | 1 | 0 | -7.224835 | -1.963779 | -1.733140 |
| 46 | 1 | 0 | -5.726938 | -2.829220 | -1.350158 |
| 47 | 1 | 0 | -6.436649 | -1.722696 | -0.170803 |
| 48 | 6 | 0 | -6.200958 | 0.612516  | -1.724355 |
| 49 | 1 | 0 | -6.377375 | 0.878957  | -0.677922 |
| 50 | 1 | 0 | -5.639861 | 1.429556  | -2.184726 |
| 51 | 1 | 0 | -7.174680 | 0.544597  | -2.219405 |
| 52 | 6 | 0 | 1.018773  | 2.173755  | -1.458244 |
| 53 | 6 | 0 | 1.841211  | -2.550412 | -0.034239 |
| 54 | 6 | 0 | 0.521448  | -3.065283 | 0.505765  |
| 55 | 1 | 0 | 0.294455  | -2.670471 | 1.496419  |
| 56 | 1 | 0 | -0.319719 | -2.816129 | -0.141498 |
| 57 | 1 | 0 | 0.565039  | -4.152885 | 0.586470  |
| 58 | 6 | 0 | 0.628108  | 1.392752  | -2.696387 |
| 59 | 1 | 0 | 1.045433  | 1.868106  | -3.588208 |
| 60 | 1 | 0 | 1.000814  | 0.366217  | -2.672651 |
| 61 | 1 | 0 | -0.455912 | 1.351810  | -2.824676 |
| 62 | 6 | 0 | 1.885270  | 2.377128  | 0.788604  |
| 63 | 6 | 0 | 2.467818  | 1.825373  | 2.073932  |
| 64 | 1 | 0 | 1.749982  | 1.869812  | 2.896109  |
| 65 | 1 | 0 | 2.792763  | 0.787768  | 1.969118  |
| 66 | 1 | 0 | 3.342451  | 2.410004  | 2.371669  |
| 67 | 6 | 0 | 3.468330  | -0.891408 | -0.809395 |
| 68 | 6 | 0 | 3.990043  | 0.489351  | -1.149450 |
| 69 | 1 | 0 | 3.385714  | 0.988352  | -1.906871 |
| 70 | 1 | 0 | 4.010790  | 1.151651  | -0.284076 |
| 71 | 1 | 0 | 5.008513  | 0.409714  | -1.533650 |

-----  
Compound 2a 3-RF-TSa

Method: b3lyp/6-311g(d,p)

SCF Done: E(RB3LYP) = -1359.15244754 A.U. after 1 cycles

Lowest frequency = -59.9356

Zero-point correction= 0.600073  
(Hartree/Particle)

Thermal correction to Energy= 0.633623  
 Thermal correction to Enthalpy= 0.634567  
 Thermal correction to Gibbs Free Energy= 0.533270  
 Sum of electronic and zero-point Energies= -1358.552375  
 Sum of electronic and thermal Energies= -1358.518825  
 Sum of electronic and thermal Enthalpies= -1358.517881  
 Sum of electronic and thermal Free Energies= -1358.619178

Standard orientation:

| Center<br>Number | Atomic<br>Number | Atomic<br>Type | Coordinates (Angstroms) |           |           |
|------------------|------------------|----------------|-------------------------|-----------|-----------|
|                  |                  |                | X                       | Y         | Z         |
| 1                | 6                | 0              | -1.918705               | -1.619468 | 1.712494  |
| 2                | 6                | 0              | -2.593497               | -0.931541 | 0.643794  |
| 3                | 6                | 0              | -1.598462               | -0.548000 | -0.281318 |
| 4                | 7                | 0              | -0.303617               | -0.888627 | 0.196188  |
| 5                | 6                | 0              | -0.542159               | -1.647910 | 1.378728  |
| 6                | 6                | 0              | 0.330509                | -2.398244 | 2.165724  |
| 7                | 6                | 0              | -0.159430               | -3.050977 | 3.293524  |
| 8                | 6                | 0              | -2.395860               | -2.272029 | 2.851283  |
| 9                | 6                | 0              | -3.949625               | -0.743811 | 0.364908  |
| 10               | 6                | 0              | -4.349911               | -0.218211 | -0.859258 |
| 11               | 6                | 0              | -3.353101               | 0.061891  | -1.811828 |
| 12               | 6                | 0              | -1.999246               | -0.112694 | -1.547951 |
| 13               | 6                | 0              | -5.824176               | -0.005030 | -1.171047 |
| 14               | 6                | 0              | -6.148316               | 1.479669  | -1.417498 |
| 15               | 6                | 0              | -6.303094               | -0.878487 | -2.344793 |
| 16               | 1                | 0              | 1.359612                | -2.523908 | 1.892325  |
| 17               | 1                | 0              | 0.524213                | -3.641874 | 3.893077  |
| 18               | 1                | 0              | -3.452156               | -2.237599 | 3.094495  |
| 19               | 1                | 0              | -4.696328               | -1.039676 | 1.095225  |
| 20               | 1                | 0              | -3.640590               | 0.402978  | -2.800561 |
| 21               | 1                | 0              | -1.289500               | 0.039745  | -2.344361 |
| 22               | 1                | 0              | -6.382962               | -0.318448 | -0.281689 |
| 23               | 1                | 0              | -7.222215               | 1.620645  | -1.573309 |
| 24               | 1                | 0              | -5.842839               | 2.095745  | -0.568158 |
| 25               | 1                | 0              | -5.631171               | 1.855731  | -2.305364 |
| 26               | 1                | 0              | -7.378837               | -0.755952 | -2.503096 |
| 27               | 1                | 0              | -6.104294               | -1.936259 | -2.155543 |
| 28               | 1                | 0              | -5.798402               | -0.605646 | -3.276338 |
| 29               | 5                | 0              | 0.973398                | -0.086443 | -0.030020 |
| 30               | 6                | 0              | 2.298216                | -0.752506 | -0.723186 |
| 31               | 6                | 0              | 3.389556                | -1.529756 | -0.227098 |
| 32               | 6                | 0              | 2.383367                | -0.418017 | -2.106192 |
| 33               | 6                | 0              | 4.486267                | -1.816649 | -1.053134 |
| 34               | 6                | 0              | 3.487294                | -0.740419 | -2.893587 |
| 35               | 6                | 0              | 4.579233                | -1.424096 | -2.380550 |
| 36               | 1                | 0              | 5.303388                | -2.390024 | -0.625650 |
| 37               | 1                | 0              | 3.480179                | -0.442236 | -3.938591 |
| 38               | 6                | 0              | 1.031130                | 1.486136  | 0.429751  |
| 39               | 6                | 0              | 1.753799                | 1.700049  | 1.642717  |
| 40               | 6                | 0              | 0.490397                | 2.665083  | -0.166913 |
| 41               | 6                | 0              | 1.949522                | 2.973302  | 2.175758  |
| 42               | 6                | 0              | 0.733272                | 3.925221  | 0.399027  |
| 43               | 6                | 0              | 1.466658                | 4.118657  | 1.558445  |
| 44               | 1                | 0              | 2.494263                | 3.060585  | 3.111450  |
| 45               | 1                | 0              | 0.306432                | 4.792338  | -0.095713 |
| 46               | 6                | 0              | 1.244561                | 0.238185  | -2.842797 |
| 47               | 1                | 0              | 0.663879                | -0.511776 | -3.390740 |

|    |   |   |           |           |           |
|----|---|---|-----------|-----------|-----------|
| 48 | 1 | 0 | 0.564164  | 0.759607  | -2.181991 |
| 49 | 1 | 0 | 1.606886  | 0.970857  | -3.568128 |
| 50 | 6 | 0 | 3.508929  | -2.214274 | 1.123972  |
| 51 | 1 | 0 | 3.027480  | -1.704633 | 1.945596  |
| 52 | 1 | 0 | 3.099269  | -3.228612 | 1.062742  |
| 53 | 1 | 0 | 4.562577  | -2.320543 | 1.390710  |
| 54 | 6 | 0 | 5.801882  | -1.715820 | -3.213299 |
| 55 | 1 | 0 | 6.503560  | -0.874825 | -3.186494 |
| 56 | 1 | 0 | 6.333223  | -2.597256 | -2.847072 |
| 57 | 1 | 0 | 5.539408  | -1.887494 | -4.260152 |
| 58 | 6 | 0 | -0.365076 | 2.749247  | -1.416925 |
| 59 | 1 | 0 | 0.242133  | 2.819764  | -2.324209 |
| 60 | 1 | 0 | -1.055835 | 1.921710  | -1.523387 |
| 61 | 1 | 0 | -0.972338 | 3.655255  | -1.375413 |
| 62 | 6 | 0 | 2.356861  | 0.577739  | 2.451055  |
| 63 | 1 | 0 | 1.708550  | -0.296565 | 2.506555  |
| 64 | 1 | 0 | 3.323824  | 0.281171  | 2.040137  |
| 65 | 1 | 0 | 2.525806  | 0.900979  | 3.480086  |
| 66 | 6 | 0 | 1.723740  | 5.493511  | 2.121626  |
| 67 | 1 | 0 | 1.666720  | 5.494087  | 3.213296  |
| 68 | 1 | 0 | 2.723501  | 5.848500  | 1.848198  |
| 69 | 1 | 0 | 1.001838  | 6.220658  | 1.743399  |
| 70 | 6 | 0 | -1.509654 | -2.977629 | 3.652588  |
| 71 | 1 | 0 | -1.864395 | -3.493176 | 4.537317  |

-----

Compound 2a 3-RF-TSb

Method: b3lyp/6-311g(d,p)

SCF Done: E(RB3LYP) = -1359.15226002 A.U. after 1 cycles

Lowest frequency = -59.7055

Zero-point correction= 0.600068  
(Hartree/Particle)  
Thermal correction to Energy= 0.633609  
Thermal correction to Enthalpy= 0.634554  
Thermal correction to Gibbs Free Energy= 0.533182  
Sum of electronic and zero-point Energies= -1358.552192  
Sum of electronic and thermal Energies= -1358.518651  
Sum of electronic and thermal Enthalpies= -1358.517706  
Sum of electronic and thermal Free Energies= -1358.619078

Standard orientation:

| Center<br>Number | Atomic<br>Number | Atomic<br>Type | Coordinates (Angstroms) |           |           |
|------------------|------------------|----------------|-------------------------|-----------|-----------|
|                  |                  |                | X                       | Y         | Z         |
| 1                | 6                | 0              | -2.053729               | -1.431745 | 1.578653  |
| 2                | 6                | 0              | -2.627668               | -0.799353 | 0.419389  |
| 3                | 6                | 0              | -1.554295               | -0.507624 | -0.453076 |
| 4                | 7                | 0              | -0.309561               | -0.849097 | 0.142660  |
| 5                | 6                | 0              | -0.658546               | -1.520988 | 1.350668  |
| 6                | 6                | 0              | 0.129631                | -2.242318 | 2.246235  |
| 7                | 6                | 0              | -0.461632               | -2.804064 | 3.374622  |
| 8                | 6                | 0              | -2.632969               | -1.992786 | 2.718520  |
| 9                | 6                | 0              | -3.951920               | -0.594835 | 0.031360  |
| 10               | 6                | 0              | -4.244106               | -0.140278 | -1.253694 |
| 11               | 6                | 0              | -3.173500               | 0.046470  | -2.142413 |
| 12               | 6                | 0              | -1.846070               | -0.148931 | -1.770068 |
| 13               | 6                | 0              | -5.676574               | 0.098880  | -1.710556 |

|    |   |   |           |           |           |
|----|---|---|-----------|-----------|-----------|
| 14 | 6 | 0 | -6.520571 | -1.188098 | -1.675571 |
| 15 | 6 | 0 | -6.352157 | 1.225704  | -0.908220 |
| 16 | 1 | 0 | 1.170791  | -2.415655 | 2.057481  |
| 17 | 1 | 0 | 0.157016  | -3.373073 | 4.059823  |
| 18 | 1 | 0 | -3.702357 | -1.912539 | 2.880094  |
| 19 | 1 | 0 | -4.751905 | -0.824649 | 0.727352  |
| 20 | 1 | 0 | -3.386762 | 0.330514  | -3.168059 |
| 21 | 1 | 0 | -1.076565 | -0.070544 | -2.520453 |
| 22 | 1 | 0 | -5.625201 | 0.426853  | -2.755159 |
| 23 | 1 | 0 | -7.523801 | -1.003049 | -2.071349 |
| 24 | 1 | 0 | -6.058815 | -1.978833 | -2.272051 |
| 25 | 1 | 0 | -6.631303 | -1.563005 | -0.653779 |
| 26 | 1 | 0 | -7.356481 | 1.426892  | -1.293294 |
| 27 | 1 | 0 | -5.773376 | 2.151010  | -0.963740 |
| 28 | 1 | 0 | -6.448107 | 0.956331  | 0.147849  |
| 29 | 5 | 0 | 1.001609  | -0.091598 | -0.037614 |
| 30 | 6 | 0 | 2.356485  | -0.828493 | -0.585414 |
| 31 | 6 | 0 | 3.384777  | -1.598063 | 0.040435  |
| 32 | 6 | 0 | 2.556576  | -0.582734 | -1.975075 |
| 33 | 6 | 0 | 4.533872  | -1.959633 | -0.677906 |
| 34 | 6 | 0 | 3.708999  | -0.977509 | -2.652451 |
| 35 | 6 | 0 | 4.739512  | -1.651787 | -2.015033 |
| 36 | 1 | 0 | 5.299742  | -2.523627 | -0.153926 |
| 37 | 1 | 0 | 3.790320  | -0.744905 | -3.710874 |
| 38 | 6 | 0 | 1.065025  | 1.505782  | 0.325966  |
| 39 | 6 | 0 | 1.698502  | 1.780622  | 1.576164  |
| 40 | 6 | 0 | 0.600576  | 2.655481  | -0.381480 |
| 41 | 6 | 0 | 1.881902  | 3.080383  | 2.045602  |
| 42 | 6 | 0 | 0.827419  | 3.943411  | 0.125790  |
| 43 | 6 | 0 | 1.472992  | 4.194269  | 1.325582  |
| 44 | 1 | 0 | 2.355973  | 3.215161  | 3.013578  |
| 45 | 1 | 0 | 0.460585  | 4.786211  | -0.452108 |
| 46 | 6 | 0 | 1.494887  | 0.049357  | -2.837132 |
| 47 | 1 | 0 | 0.937964  | -0.721706 | -3.380476 |
| 48 | 1 | 0 | 0.780229  | 0.626403  | -2.264693 |
| 49 | 1 | 0 | 1.930297  | 0.725919  | -3.576629 |
| 50 | 6 | 0 | 3.379706  | -2.200503 | 1.435005  |
| 51 | 1 | 0 | 2.851613  | -1.629036 | 2.184114  |
| 52 | 1 | 0 | 2.945969  | -3.206122 | 1.402364  |
| 53 | 1 | 0 | 4.406056  | -2.316379 | 1.789666  |
| 54 | 6 | 0 | 6.014683  | -2.021101 | -2.729854 |
| 55 | 1 | 0 | 6.737854  | -1.199028 | -2.690164 |
| 56 | 1 | 0 | 6.487691  | -2.895201 | -2.276377 |
| 57 | 1 | 0 | 5.830863  | -2.242424 | -3.784097 |
| 58 | 6 | 0 | -0.148915 | 2.679255  | -1.700381 |
| 59 | 1 | 0 | 0.532019  | 2.685667  | -2.556679 |
| 60 | 1 | 0 | -0.846113 | 1.858458  | -1.816012 |
| 61 | 1 | 0 | -0.737954 | 3.596126  | -1.761634 |
| 62 | 6 | 0 | 2.213706  | 0.699019  | 2.493505  |
| 63 | 1 | 0 | 1.538962  | -0.154511 | 2.558120  |
| 64 | 1 | 0 | 3.197846  | 0.353876  | 2.170741  |
| 65 | 1 | 0 | 2.320808  | 1.083837  | 3.509541  |
| 66 | 6 | 0 | 1.716150  | 5.596094  | 1.824862  |
| 67 | 1 | 0 | 1.560444  | 5.667160  | 2.904586  |
| 68 | 1 | 0 | 2.746071  | 5.910850  | 1.623735  |
| 69 | 1 | 0 | 1.051888  | 6.313485  | 1.338045  |
| 70 | 6 | 0 | -1.830755 | -2.668173 | 3.627466  |
| 71 | 1 | 0 | -2.265338 | -3.113059 | 4.514912  |

Compound Z-2b GS1

Method: b3lyp/6-311g(d,p)

SCF Done: E(RB3LYP) = -1319.90432820 A.U. after 1 cycles

Lowest frequency = 21.2990

Zero-point correction= 0.572511  
(Hartree/Particle)  
Thermal correction to Energy= 0.605338  
Thermal correction to Enthalpy= 0.606283  
Thermal correction to Gibbs Free Energy= 0.507025  
Sum of electronic and zero-point Energies= -1319.331817  
Sum of electronic and thermal Energies= -1319.298990  
Sum of electronic and thermal Enthalpies= -1319.298046  
Sum of electronic and thermal Free Energies= -1319.397303

Standard orientation:

| Center<br>Number | Atomic<br>Number | Atomic<br>Type | Coordinates (Angstroms) |           |           |
|------------------|------------------|----------------|-------------------------|-----------|-----------|
|                  |                  |                | X                       | Y         | Z         |
| 1                | 5                | 0              | 1.177427                | 0.038005  | 0.021389  |
| 2                | 6                | 0              | 3.712307                | 0.326221  | -1.669237 |
| 3                | 1                | 0              | 3.006374                | -0.086707 | -2.396093 |
| 4                | 1                | 0              | 3.428108                | 1.366667  | -1.499296 |
| 5                | 1                | 0              | 4.699767                | 0.317107  | -2.134735 |
| 6                | 6                | 0              | 1.988631                | 2.005814  | 2.230251  |
| 7                | 1                | 0              | 2.230803                | 2.846186  | 2.883604  |
| 8                | 1                | 0              | 1.218599                | 1.413733  | 2.733657  |
| 9                | 1                | 0              | 2.876651                | 1.375978  | 2.147302  |
| 10               | 6                | 0              | 0.149088                | 1.320657  | -2.519195 |
| 11               | 1                | 0              | 0.723469                | 0.402792  | -2.652204 |
| 12               | 1                | 0              | -0.893712               | 1.025641  | -2.366853 |
| 13               | 1                | 0              | 0.198072                | 1.881404  | -3.455025 |
| 14               | 6                | 0              | 1.075924                | 5.923037  | -0.766923 |
| 15               | 1                | 0              | 0.876266                | 6.467029  | 0.159444  |
| 16               | 1                | 0              | 2.053381                | 6.254214  | -1.135112 |
| 17               | 1                | 0              | 0.329665                | 6.223450  | -1.506017 |
| 18               | 6                | 0              | 1.061017                | 4.430628  | -0.543550 |
| 19               | 6                | 0              | 1.484019                | 3.878890  | 0.665245  |
| 20               | 1                | 0              | 1.798901                | 4.540775  | 1.466968  |
| 21               | 6                | 0              | 1.522015                | 2.499691  | 0.877267  |
| 22               | 6                | 0              | 1.094497                | 1.611779  | -0.141689 |
| 23               | 6                | 0              | 0.648799                | 2.169496  | -1.367326 |
| 24               | 6                | 0              | 0.651904                | 3.554649  | -1.546661 |
| 25               | 1                | 0              | 0.319583                | 3.959228  | -2.498598 |
| 26               | 6                | 0              | 2.640178                | -1.445639 | 1.573395  |
| 27               | 6                | 0              | 3.867685                | -1.995448 | 1.953617  |
| 28               | 1                | 0              | 3.925332                | -2.578506 | 2.867145  |
| 29               | 6                | 0              | 5.006379                | -1.810366 | 1.180857  |
| 30               | 6                | 0              | 4.927344                | -1.056786 | 0.016224  |
| 31               | 1                | 0              | 5.813277                | -0.912938 | -0.593629 |
| 32               | 6                | 0              | 3.722999                | -0.471061 | -0.382388 |
| 33               | 6                | 0              | 2.551811                | -0.662855 | 0.393246  |
| 34               | 6                | 0              | 1.442699                | -1.729463 | 2.457648  |
| 35               | 1                | 0              | 0.840454                | -2.548575 | 2.052509  |
| 36               | 1                | 0              | 1.768974                | -2.025397 | 3.456966  |
| 37               | 1                | 0              | 0.779365                | -0.870189 | 2.566317  |
| 38               | 7                | 0              | -0.010033               | -0.768474 | -0.169728 |
| 39               | 6                | 0              | -0.066323               | -2.128431 | -0.590750 |

|    |   |   |           |           |           |
|----|---|---|-----------|-----------|-----------|
| 40 | 6 | 0 | -1.361608 | -0.363432 | 0.033064  |
| 41 | 6 | 0 | -1.410598 | -2.554580 | -0.654569 |
| 42 | 6 | 0 | 0.964270  | -2.985009 | -0.983132 |
| 43 | 6 | 0 | -2.231720 | -1.435361 | -0.244254 |
| 44 | 6 | 0 | -1.726406 | -3.847597 | -1.077707 |
| 45 | 6 | 0 | 0.631812  | -4.271635 | -1.398410 |
| 46 | 1 | 0 | 1.997453  | -2.672631 | -0.963533 |
| 47 | 6 | 0 | -3.611985 | -1.292764 | -0.081906 |
| 48 | 6 | 0 | -0.698429 | -4.706596 | -1.443199 |
| 49 | 1 | 0 | -2.759964 | -4.171968 | -1.125715 |
| 50 | 1 | 0 | 1.425777  | -4.946773 | -1.697011 |
| 51 | 6 | 0 | -4.143109 | -0.086513 | 0.366322  |
| 52 | 1 | 0 | -4.272495 | -2.126336 | -0.299110 |
| 53 | 1 | 0 | -0.924438 | -5.713924 | -1.773533 |
| 54 | 6 | 0 | -3.253624 | 0.964674  | 0.658242  |
| 55 | 1 | 0 | -3.646179 | 1.908884  | 1.019749  |
| 56 | 6 | 0 | -1.876552 | 0.844556  | 0.507655  |
| 57 | 1 | 0 | -1.233388 | 1.677355  | 0.749742  |
| 58 | 6 | 0 | -5.645636 | 0.081059  | 0.544336  |
| 59 | 1 | 0 | -6.105951 | -0.871247 | 0.256745  |
| 60 | 6 | 0 | -6.026829 | 0.350339  | 2.011380  |
| 61 | 1 | 0 | -7.113964 | 0.401012  | 2.124786  |
| 62 | 1 | 0 | -5.651890 | -0.439343 | 2.667222  |
| 63 | 1 | 0 | -5.611934 | 1.299999  | 2.361885  |
| 64 | 6 | 0 | -6.218289 | 1.166760  | -0.384828 |
| 65 | 1 | 0 | -5.810499 | 2.152521  | -0.142200 |
| 66 | 1 | 0 | -5.980506 | 0.956092  | -1.430494 |
| 67 | 1 | 0 | -7.306618 | 1.224121  | -0.287025 |
| 68 | 1 | 0 | 5.950741  | -2.248638 | 1.485155  |

-----

Compound Z-2b GS2

Method: b3lyp/6-311g(d,p)

SCF Done: E(RB3LYP) = -1319.90414102 A.U. after 1 cycles

Lowest frequency = 19.8828

Zero-point correction= 0.572546  
(Hartree/Particle)  
Thermal correction to Energy= 0.605332  
Thermal correction to Enthalpy= 0.606276  
Thermal correction to Gibbs Free Energy= 0.507070  
Sum of electronic and zero-point Energies= -1319.331595  
Sum of electronic and thermal Energies= -1319.298809  
Sum of electronic and thermal Enthalpies= -1319.297865  
Sum of electronic and thermal Free Energies= -1319.397071

Standard orientation:

| Center<br>Number | Atomic<br>Number | Atomic<br>Type | Coordinates (Angstroms) |           |           |
|------------------|------------------|----------------|-------------------------|-----------|-----------|
|                  |                  |                | X                       | Y         | Z         |
| 1                | 5                | 0              | 1.196821                | -0.075094 | 0.025359  |
| 2                | 6                | 0              | 3.706826                | -0.177897 | -1.723672 |
| 3                | 1                | 0              | 2.926163                | -0.452243 | -2.439543 |
| 4                | 1                | 0              | 3.604231                | 0.891572  | -1.529029 |
| 5                | 1                | 0              | 4.668490                | -0.341729 | -2.213777 |
| 6                | 6                | 0              | 2.372342                | 1.683284  | 2.247148  |
| 7                | 1                | 0              | 2.765725                | 2.457511  | 2.908634  |
| 8                | 1                | 0              | 1.524218                | 1.218481  | 2.758591  |

|    |   |   |           |           |           |
|----|---|---|-----------|-----------|-----------|
| 9  | 1 | 0 | 3.139949  | 0.915302  | 2.132628  |
| 10 | 6 | 0 | 0.343601  | 1.413296  | -2.466421 |
| 11 | 1 | 0 | 0.759639  | 0.418859  | -2.634461 |
| 12 | 1 | 0 | -0.728608 | 1.285082  | -2.288749 |
| 13 | 1 | 0 | 0.457378  | 1.981277  | -3.392175 |
| 14 | 6 | 0 | 2.069107  | 5.758530  | -0.661890 |
| 15 | 1 | 0 | 1.982591  | 6.309481  | 0.277747  |
| 16 | 1 | 0 | 3.080679  | 5.928400  | -1.047295 |
| 17 | 1 | 0 | 1.369185  | 6.194781  | -1.378270 |
| 18 | 6 | 0 | 1.807943  | 4.285561  | -0.462886 |
| 19 | 6 | 0 | 2.157592  | 3.646187  | 0.725976  |
| 20 | 1 | 0 | 2.596147  | 4.229387  | 1.530682  |
| 21 | 6 | 0 | 1.967495  | 2.276098  | 0.914150  |
| 22 | 6 | 0 | 1.375417  | 1.493558  | -0.108776 |
| 23 | 6 | 0 | 1.003610  | 2.143025  | -1.313662 |
| 24 | 6 | 0 | 1.235908  | 3.511353  | -1.470085 |
| 25 | 1 | 0 | 0.956069  | 3.985355  | -2.406729 |
| 26 | 6 | 0 | 2.424923  | -1.814738 | 1.513813  |
| 27 | 6 | 0 | 3.551623  | -2.568794 | 1.853811  |
| 28 | 1 | 0 | 3.531081  | -3.172470 | 2.755463  |
| 29 | 6 | 0 | 4.688266  | -2.559106 | 1.056313  |
| 30 | 6 | 0 | 4.710622  | -1.778361 | -0.092751 |
| 31 | 1 | 0 | 5.594744  | -1.770758 | -0.721842 |
| 32 | 6 | 0 | 3.612258  | -0.992541 | -0.451220 |
| 33 | 6 | 0 | 2.442518  | -1.003380 | 0.349897  |
| 34 | 6 | 0 | 1.216444  | -1.914186 | 2.422695  |
| 35 | 1 | 0 | 0.475944  | -2.610574 | 2.017146  |
| 36 | 1 | 0 | 1.510000  | -2.284345 | 3.407309  |
| 37 | 1 | 0 | 0.710123  | -0.958381 | 2.565212  |
| 38 | 7 | 0 | -0.112885 | -0.667337 | -0.149094 |
| 39 | 6 | 0 | -0.405968 | -1.989572 | -0.592089 |
| 40 | 6 | 0 | -1.372520 | -0.045328 | 0.093893  |
| 41 | 6 | 0 | -1.803447 | -2.183586 | -0.630455 |
| 42 | 6 | 0 | 0.457822  | -2.997908 | -1.024340 |
| 43 | 6 | 0 | -2.417499 | -0.951448 | -0.181199 |
| 44 | 6 | 0 | -2.340411 | -3.396195 | -1.068018 |
| 45 | 6 | 0 | -0.094286 | -4.201837 | -1.453549 |
| 46 | 1 | 0 | 1.528878  | -2.862964 | -1.024837 |
| 47 | 6 | 0 | -3.749549 | -0.586594 | 0.014527  |
| 48 | 6 | 0 | -1.479138 | -4.407308 | -1.473322 |
| 49 | 1 | 0 | -3.414509 | -3.542164 | -1.096340 |
| 50 | 1 | 0 | 0.568833  | -4.993657 | -1.783172 |
| 51 | 6 | 0 | -4.061530 | 0.685026  | 0.495896  |
| 52 | 1 | 0 | -4.537271 | -1.299995 | -0.203652 |
| 53 | 1 | 0 | -1.877870 | -5.355413 | -1.815363 |
| 54 | 6 | 0 | -3.004028 | 1.563608  | 0.783530  |
| 55 | 1 | 0 | -3.234958 | 2.551413  | 1.169224  |
| 56 | 6 | 0 | -1.667059 | 1.219931  | 0.599905  |
| 57 | 1 | 0 | -0.889959 | 1.929583  | 0.841260  |
| 58 | 6 | 0 | -5.503967 | 1.119933  | 0.717586  |
| 59 | 1 | 0 | -5.469550 | 2.144962  | 1.103901  |
| 60 | 6 | 0 | -6.303822 | 1.151969  | -0.597384 |
| 61 | 1 | 0 | -7.316377 | 1.529364  | -0.425216 |
| 62 | 1 | 0 | -5.821062 | 1.795663  | -1.336919 |
| 63 | 1 | 0 | -6.391231 | 0.151926  | -1.032511 |
| 64 | 6 | 0 | -6.212584 | 0.254886  | 1.775541  |
| 65 | 1 | 0 | -6.299096 | -0.784617 | 1.445451  |
| 66 | 1 | 0 | -5.663841 | 0.259480  | 2.720597  |
| 67 | 1 | 0 | -7.223509 | 0.627922  | 1.965709  |
| 68 | 1 | 0 | 5.552820  | -3.154466 | 1.329439  |

-----  
Compound E-2b GS1

Method: b3lyp/6-311g(d,p)

SCF Done: E(RB3LYP) = -1319.90432873 A.U. after 1 cycles

Lowest frequency = 20.9114

Zero-point correction= 0.572485  
(Hartree/Particle)  
Thermal correction to Energy= 0.605318  
Thermal correction to Enthalpy= 0.606262  
Thermal correction to Gibbs Free Energy= 0.506982  
Sum of electronic and zero-point Energies= -1319.331844  
Sum of electronic and thermal Energies= -1319.299011  
Sum of electronic and thermal Enthalpies= -1319.298066  
Sum of electronic and thermal Free Energies= -1319.397347

Standard orientation:

-----

| Center<br>Number | Atomic<br>Number | Atomic<br>Type | Coordinates (Angstroms) |           |           |
|------------------|------------------|----------------|-------------------------|-----------|-----------|
|                  |                  |                | X                       | Y         | Z         |
| 1                | 5                | 0              | 0.940970                | 0.445629  | -0.110898 |
| 2                | 6                | 0              | 3.352769                | 1.032308  | -1.912855 |
| 3                | 1                | 0              | 2.677703                | 0.518476  | -2.603628 |
| 4                | 1                | 0              | 2.945135                | 2.031616  | -1.747241 |
| 5                | 1                | 0              | 4.314376                | 1.139714  | -2.418337 |
| 6                | 6                | 0              | 1.557663                | 2.554761  | 2.019936  |
| 7                | 1                | 0              | 1.704012                | 3.434348  | 2.649841  |
| 8                | 1                | 0              | 0.890172                | 1.875978  | 2.559176  |
| 9                | 1                | 0              | 2.519373                | 2.047750  | 1.918548  |
| 10               | 6                | 0              | -0.328988               | 1.498799  | -2.642080 |
| 11               | 1                | 0              | 0.356690                | 0.659896  | -2.769491 |
| 12               | 1                | 0              | -1.317920               | 1.074996  | -2.441540 |
| 13               | 1                | 0              | -0.386086               | 2.028625  | -3.595333 |
| 14               | 6                | 0              | 0.236608                | 4.744854  | -0.776635 |
| 15               | 6                | 0              | 0.766725                | 4.310346  | 0.431972  |
| 16               | 1                | 0              | 1.020769                | 5.033642  | 1.199968  |
| 17               | 6                | 0              | 0.987279                | 2.952174  | 0.675108  |
| 18               | 6                | 0              | 0.645416                | 1.992079  | -0.310559 |
| 19               | 6                | 0              | 0.091551                | 2.445158  | -1.535773 |
| 20               | 6                | 0              | -0.091801               | 3.813697  | -1.752909 |
| 21               | 1                | 0              | -0.500945               | 4.148254  | -2.700810 |
| 22               | 6                | 0              | 2.656000                | -0.799518 | 1.392064  |
| 23               | 6                | 0              | 3.960698                | -1.173290 | 1.722579  |
| 24               | 1                | 0              | 4.128523                | -1.728680 | 2.641089  |
| 25               | 6                | 0              | 5.048714                | -0.862173 | 0.910166  |
| 26               | 6                | 0              | 4.799234                | -0.146587 | -0.260551 |
| 27               | 1                | 0              | 5.629300                | 0.099841  | -0.916502 |
| 28               | 6                | 0              | 3.515007                | 0.269673  | -0.615057 |
| 29               | 6                | 0              | 2.408692                | -0.058046 | 0.208650  |
| 30               | 6                | 0              | 1.550624                | -1.226547 | 2.337002  |
| 31               | 1                | 0              | 1.053467                | -2.132366 | 1.976311  |
| 32               | 1                | 0              | 1.958694                | -1.447995 | 3.325476  |
| 33               | 1                | 0              | 0.777682                | -0.466646 | 2.459799  |
| 34               | 7                | 0              | -0.142021               | -0.509377 | -0.220387 |
| 35               | 6                | 0              | -0.043617               | -1.876683 | -0.609216 |
| 36               | 6                | 0              | -1.524561               | -0.270737 | 0.030960  |
| 37               | 6                | 0              | -1.325140               | -2.468640 | -0.605919 |

-----



|    |   |   |           |           |           |
|----|---|---|-----------|-----------|-----------|
| 38 | 6 | 0 | 1.069855  | -2.608175 | -1.027436 |
| 39 | 6 | 0 | -2.263514 | -1.449786 | -0.185627 |
| 40 | 6 | 0 | -1.492640 | -3.801862 | -0.987059 |
| 41 | 6 | 0 | 0.885305  | -3.936808 | -1.400285 |
| 42 | 1 | 0 | 2.055228  | -2.168287 | -1.058969 |
| 43 | 6 | 0 | -3.643405 | -1.475530 | 0.031121  |
| 44 | 6 | 0 | -0.380379 | -4.535449 | -1.378006 |
| 45 | 1 | 0 | -2.478331 | -4.253712 | -0.983335 |
| 46 | 1 | 0 | 1.745154  | -4.515396 | -1.718538 |
| 47 | 6 | 0 | -4.303825 | -0.332702 | 0.473737  |
| 48 | 1 | 0 | -4.202197 | -2.390332 | -0.139728 |
| 49 | 1 | 0 | -0.491035 | -5.571614 | -1.676392 |
| 50 | 6 | 0 | -3.542554 | 0.828485  | 0.704785  |
| 51 | 1 | 0 | -4.036180 | 1.726147  | 1.060916  |
| 52 | 6 | 0 | -2.168099 | 0.876269  | 0.499790  |
| 53 | 1 | 0 | -1.626013 | 1.788979  | 0.696821  |
| 54 | 6 | 0 | -5.807822 | -0.347654 | 0.708474  |
| 55 | 1 | 0 | -6.155264 | -1.358765 | 0.466757  |
| 56 | 6 | 0 | -6.165872 | -0.079538 | 2.181513  |
| 57 | 1 | 0 | -7.245839 | -0.161401 | 2.337246  |
| 58 | 1 | 0 | -5.670663 | -0.794003 | 2.843798  |
| 59 | 1 | 0 | -5.861787 | 0.925647  | 2.488105  |
| 60 | 6 | 0 | -6.545727 | 0.627195  | -0.227110 |
| 61 | 1 | 0 | -6.255520 | 1.663344  | -0.029528 |
| 62 | 1 | 0 | -6.322177 | 0.412823  | -1.275161 |
| 63 | 1 | 0 | -7.628339 | 0.552628  | -0.086710 |
| 64 | 1 | 0 | 0.082812  | 5.803319  | -0.956915 |
| 65 | 6 | 0 | 6.452591  | -1.258047 | 1.297173  |
| 66 | 1 | 0 | 7.062542  | -1.475785 | 0.417050  |
| 67 | 1 | 0 | 6.949891  | -0.450745 | 1.846352  |
| 68 | 1 | 0 | 6.455328  | -2.140964 | 1.940379  |

-----

Compound E-2b GS2

Method: b3lyp/6-311g(d,p)

SCF Done: E(RB3LYP) = -1319.90414446 A.U. after 1 cycles

Lowest frequency = 19.4776

Zero-point correction= 0.572508  
(Hartree/Particle)  
Thermal correction to Energy= 0.605326  
Thermal correction to Enthalpy= 0.606270  
Thermal correction to Gibbs Free Energy= 0.506972  
Sum of electronic and zero-point Energies= -1319.331636  
Sum of electronic and thermal Energies= -1319.298819  
Sum of electronic and thermal Enthalpies= -1319.297875  
Sum of electronic and thermal Free Energies= -1319.397172

Standard orientation:

| Center<br>Number | Atomic<br>Number | Atomic<br>Type | Coordinates (Angstroms) |          |           |
|------------------|------------------|----------------|-------------------------|----------|-----------|
|                  |                  |                | X                       | Y        | Z         |
| 1                | 5                | 0              | 0.993652                | 0.441601 | -0.090294 |
| 2                | 6                | 0              | 3.421282                | 0.824715 | -1.925803 |
| 3                | 1                | 0              | 2.690004                | 0.396024 | -2.617527 |
| 4                | 1                | 0              | 3.114603                | 1.854068 | -1.729637 |
| 5                | 1                | 0              | 4.381516                | 0.851726 | -2.444404 |
| 6                | 6                | 0              | 1.858671                | 2.422658 | 2.077086  |

|    |   |   |           |           |           |
|----|---|---|-----------|-----------|-----------|
| 7  | 1 | 0 | 2.106275  | 3.266544  | 2.723932  |
| 8  | 1 | 0 | 1.134710  | 1.802654  | 2.614223  |
| 9  | 1 | 0 | 2.761018  | 1.822388  | 1.944097  |
| 10 | 6 | 0 | -0.205585 | 1.682181  | -2.570181 |
| 11 | 1 | 0 | 0.393096  | 0.785027  | -2.734334 |
| 12 | 1 | 0 | -1.226710 | 1.350317  | -2.358164 |
| 13 | 1 | 0 | -0.230075 | 2.241048  | -3.508114 |
| 14 | 6 | 0 | 0.716732  | 4.805874  | -0.639160 |
| 15 | 6 | 0 | 1.221434  | 4.289230  | 0.547747  |
| 16 | 1 | 0 | 1.560749  | 4.963225  | 1.327554  |
| 17 | 6 | 0 | 1.307738  | 2.909905  | 0.753903  |
| 18 | 6 | 0 | 0.853257  | 2.014761  | -0.247162 |
| 19 | 6 | 0 | 0.327038  | 2.552731  | -1.450039 |
| 20 | 6 | 0 | 0.279016  | 3.937891  | -1.630676 |
| 21 | 1 | 0 | -0.110630 | 4.336197  | -2.561999 |
| 22 | 6 | 0 | 2.598090  | -1.009581 | 1.348596  |
| 23 | 6 | 0 | 3.862855  | -1.523814 | 1.643500  |
| 24 | 1 | 0 | 3.988727  | -2.117097 | 2.544859  |
| 25 | 6 | 0 | 4.962655  | -1.305209 | 0.816817  |
| 26 | 6 | 0 | 4.767760  | -0.537703 | -0.331080 |
| 27 | 1 | 0 | 5.607127  | -0.360785 | -0.997547 |
| 28 | 6 | 0 | 3.527120  | 0.016978  | -0.649653 |
| 29 | 6 | 0 | 2.407706  | -0.216540 | 0.188248  |
| 30 | 6 | 0 | 1.471275  | -1.344242 | 2.305336  |
| 31 | 1 | 0 | 0.871124  | -2.178713 | 1.929672  |
| 32 | 1 | 0 | 1.871836  | -1.639837 | 3.277331  |
| 33 | 1 | 0 | 0.788666  | -0.508970 | 2.468083  |
| 34 | 7 | 0 | -0.182590 | -0.395474 | -0.201127 |
| 35 | 6 | 0 | -0.231096 | -1.755484 | -0.624140 |
| 36 | 6 | 0 | -1.528938 | -0.023804 | 0.084288  |
| 37 | 6 | 0 | -1.565519 | -2.214901 | -0.608600 |
| 38 | 6 | 0 | 0.794610  | -2.584700 | -1.082578 |
| 39 | 6 | 0 | -2.389002 | -1.117668 | -0.144950 |
| 40 | 6 | 0 | -1.874364 | -3.513795 | -1.018190 |
| 41 | 6 | 0 | 0.469433  | -3.877703 | -1.483677 |
| 42 | 1 | 0 | 1.818889  | -2.246211 | -1.123578 |
| 43 | 6 | 0 | -3.758565 | -1.012760 | 0.097654  |
| 44 | 6 | 0 | -0.849746 | -4.345784 | -1.449805 |
| 45 | 1 | 0 | -2.900585 | -3.863775 | -1.005072 |
| 46 | 1 | 0 | 1.260259  | -4.531609 | -1.833525 |
| 47 | 6 | 0 | -4.292474 | 0.182224  | 0.580496  |
| 48 | 1 | 0 | -4.401419 | -1.867286 | -0.085482 |
| 49 | 1 | 0 | -1.070553 | -5.357242 | -1.770874 |
| 50 | 6 | 0 | -3.414589 | 1.251788  | 0.821590  |
| 51 | 1 | 0 | -3.817612 | 2.182498  | 1.207825  |
| 52 | 6 | 0 | -2.043659 | 1.168579  | 0.591123  |
| 53 | 1 | 0 | -1.410277 | 2.017996  | 0.798555  |
| 54 | 6 | 0 | -5.782986 | 0.334781  | 0.852516  |
| 55 | 1 | 0 | -5.933497 | 1.353259  | 1.228215  |
| 56 | 6 | 0 | -6.619827 | 0.191197  | -0.431642 |
| 57 | 1 | 0 | -7.679453 | 0.369300  | -0.224773 |
| 58 | 1 | 0 | -6.296761 | 0.903890  | -1.194525 |
| 59 | 1 | 0 | -6.527914 | -0.813803 | -0.854252 |
| 60 | 6 | 0 | -6.273546 | -0.633619 | 1.943983  |
| 61 | 1 | 0 | -6.169248 | -1.675448 | 1.626589  |
| 62 | 1 | 0 | -5.703163 | -0.508301 | 2.867687  |
| 63 | 1 | 0 | -7.330150 | -0.459336 | 2.168703  |
| 64 | 1 | 0 | 0.667391  | 5.878741  | -0.790937 |
| 65 | 6 | 0 | 6.324699  | -1.853446 | 1.165657  |
| 66 | 1 | 0 | 6.893830  | -2.108234 | 0.268307  |

|    |   |   |          |           |          |
|----|---|---|----------|-----------|----------|
| 67 | 1 | 0 | 6.911878 | -1.116941 | 1.725505 |
| 68 | 1 | 0 | 6.247385 | -2.749442 | 1.785737 |

-----

Compound 2b 2-RF-CC-TS

Method: b3lyp/6-311g(d,p)

SCF Done: E(RB3LYP) = -1319.88671230 A.U. after 1 cycles

Lowest frequency = -60.7239

|                                              |              |
|----------------------------------------------|--------------|
| Zero-point correction=                       | 0.572785     |
| (Hartree/Particle)                           |              |
| Thermal correction to Energy=                | 0.604546     |
| Thermal correction to Enthalpy=              | 0.605490     |
| Thermal correction to Gibbs Free Energy=     | 0.509033     |
| Sum of electronic and zero-point Energies=   | -1319.313927 |
| Sum of electronic and thermal Energies=      | -1319.282166 |
| Sum of electronic and thermal Enthalpies=    | -1319.281222 |
| Sum of electronic and thermal Free Energies= | -1319.377679 |

Standard orientation:

| Center<br>Number | Atomic<br>Number | Atomic<br>Type | Coordinates (Angstroms) |           |           |
|------------------|------------------|----------------|-------------------------|-----------|-----------|
|                  |                  |                | X                       | Y         | Z         |
| 1                | 5                | 0              | 0.899676                | 0.351328  | 0.000043  |
| 2                | 6                | 0              | 0.592150                | 4.782654  | 0.000173  |
| 3                | 6                | 0              | 0.556814                | 4.076355  | -1.192686 |
| 4                | 1                | 0              | 0.498490                | 4.611731  | -2.135431 |
| 5                | 6                | 0              | 0.642687                | 1.943610  | 0.000084  |
| 6                | 6                | 0              | 0.556731                | 4.076279  | 1.192985  |
| 7                | 1                | 0              | 0.498341                | 4.611595  | 2.135760  |
| 8                | 6                | 0              | 4.551703                | -0.442777 | 1.186301  |
| 9                | 1                | 0              | 5.073671                | -0.567873 | 2.131596  |
| 10               | 6                | 0              | 5.279101                | -0.473173 | 0.000172  |
| 11               | 6                | 0              | 4.551787                | -0.442701 | -1.186006 |
| 12               | 1                | 0              | 5.073822                | -0.567736 | -2.131273 |
| 13               | 6                | 0              | 2.439011                | -0.120396 | 0.000083  |
| 14               | 6                | 0              | 6.784455                | -0.572261 | 0.000222  |
| 15               | 1                | 0              | 7.150936                | -1.098343 | -0.884684 |
| 16               | 1                | 0              | 7.241192                | 0.423708  | 0.000274  |
| 17               | 1                | 0              | 7.150873                | -1.098407 | 0.885117  |
| 18               | 7                | 0              | -0.188106               | -0.587974 | -0.000025 |
| 19               | 6                | 0              | -0.096679               | -2.021840 | -0.000070 |
| 20               | 6                | 0              | -1.594563               | -0.292021 | -0.000065 |
| 21               | 6                | 0              | -1.390022               | -2.582342 | -0.000135 |
| 22               | 6                | 0              | 1.023992                | -2.853552 | -0.000058 |
| 23               | 6                | 0              | -2.335721               | -1.487313 | -0.000132 |
| 24               | 6                | 0              | -1.571484               | -3.966223 | -0.000188 |
| 25               | 6                | 0              | 0.827230                | -4.233076 | -0.000112 |
| 26               | 1                | 0              | 2.024861                | -2.454691 | -0.000009 |
| 27               | 6                | 0              | -3.731566               | -1.467896 | -0.000180 |
| 28               | 6                | 0              | -0.454770               | -4.791537 | -0.000176 |
| 29               | 1                | 0              | -2.570402               | -4.387753 | -0.000238 |
| 30               | 1                | 0              | 1.694922                | -4.883036 | -0.000103 |
| 31               | 6                | 0              | -4.414429               | -0.254621 | -0.000163 |
| 32               | 1                | 0              | -4.286200               | -2.400885 | -0.000232 |
| 33               | 1                | 0              | -0.574715               | -5.868822 | -0.000217 |
| 34               | 6                | 0              | -3.657044               | 0.929456  | -0.000095 |
| 35               | 1                | 0              | -4.165421               | 1.887491  | -0.000079 |

|    |   |   |           |           |           |
|----|---|---|-----------|-----------|-----------|
| 36 | 6 | 0 | -2.265354 | 0.931986  | -0.000046 |
| 37 | 1 | 0 | -1.735531 | 1.870137  | 0.000006  |
| 38 | 6 | 0 | -5.936093 | -0.219429 | -0.000215 |
| 39 | 1 | 0 | -6.276426 | -1.261366 | -0.000265 |
| 40 | 6 | 0 | -6.496772 | 0.446845  | 1.269283  |
| 41 | 1 | 0 | -7.589958 | 0.401678  | 1.277970  |
| 42 | 1 | 0 | -6.127789 | -0.048949 | 2.170583  |
| 43 | 1 | 0 | -6.207386 | 1.500328  | 1.325836  |
| 44 | 6 | 0 | -6.496682 | 0.446938  | -1.269704 |
| 45 | 1 | 0 | -6.207292 | 1.500425  | -1.326160 |
| 46 | 1 | 0 | -6.127636 | -0.048791 | -2.171014 |
| 47 | 1 | 0 | -7.589868 | 0.401772  | -1.278471 |
| 48 | 6 | 0 | 3.162819  | -0.293164 | 1.206670  |
| 49 | 6 | 0 | 0.561644  | 2.678317  | -1.210657 |
| 50 | 6 | 0 | 0.378384  | 2.026709  | -2.565060 |
| 51 | 1 | 0 | 1.309595  | 1.991819  | -3.134826 |
| 52 | 1 | 0 | -0.012539 | 1.012699  | -2.490381 |
| 53 | 1 | 0 | -0.337616 | 2.603943  | -3.155678 |
| 54 | 6 | 0 | 2.494844  | -0.461036 | 2.556278  |
| 55 | 1 | 0 | 2.867644  | -1.372405 | 3.032735  |
| 56 | 1 | 0 | 2.716747  | 0.366708  | 3.234526  |
| 57 | 1 | 0 | 1.414149  | -0.561654 | 2.481985  |
| 58 | 6 | 0 | 3.162904  | -0.293087 | -1.206463 |
| 59 | 6 | 0 | 2.495025  | -0.460875 | -2.556129 |
| 60 | 1 | 0 | 1.414322  | -0.561474 | -2.481921 |
| 61 | 1 | 0 | 2.716995  | 0.366899  | -3.234318 |
| 62 | 1 | 0 | 2.867840  | -1.372227 | -3.032606 |
| 63 | 6 | 0 | 0.561559  | 2.678240  | 1.210867  |
| 64 | 6 | 0 | 0.378202  | 2.026546  | 2.565215  |
| 65 | 1 | 0 | -0.012693 | 1.012532  | 2.490444  |
| 66 | 1 | 0 | 1.309367  | 1.991642  | 3.135055  |
| 67 | 1 | 0 | -0.337858 | 2.603728  | 3.155810  |
| 68 | 1 | 0 | 0.594747  | 5.867072  | 0.000208  |

-----

Compound 2b 2-RF-CmesN-TS

Method: b3lyp/6-311g(d,p)

SCF Done: E(RB3LYP) = -1319.86689320 A.U. after 1 cycles

Lowest frequency = -39.4724

Zero-point correction= 0.572889  
(Hartree/Particle)  
Thermal correction to Energy= 0.604244  
Thermal correction to Enthalpy= 0.605188  
Thermal correction to Gibbs Free Energy= 0.510770  
Sum of electronic and zero-point Energies= -1319.294004  
Sum of electronic and thermal Energies= -1319.262649  
Sum of electronic and thermal Enthalpies= -1319.261705  
Sum of electronic and thermal Free Energies= -1319.356123

Standard orientation:

| Center<br>Number | Atomic<br>Number | Atomic<br>Type | Coordinates (Angstroms) |           |           |
|------------------|------------------|----------------|-------------------------|-----------|-----------|
|                  |                  |                | X                       | Y         | Z         |
| 1                | 5                | 0              | 1.207007                | -0.409732 | -0.162782 |
| 2                | 6                | 0              | 3.208542                | -3.971267 | -1.828773 |
| 3                | 6                | 0              | 1.986725                | -4.096358 | -1.187544 |
| 4                | 1                | 0              | 1.529210                | -5.075199 | -1.099974 |

|    |   |   |           |           |           |
|----|---|---|-----------|-----------|-----------|
| 5  | 6 | 0 | 1.909971  | -1.678644 | -0.750086 |
| 6  | 6 | 0 | 3.794142  | -2.720034 | -1.940835 |
| 7  | 1 | 0 | 4.750164  | -2.620907 | -2.442265 |
| 8  | 6 | 0 | 1.756903  | 3.320086  | -1.212130 |
| 9  | 1 | 0 | 1.479758  | 3.963554  | -2.043031 |
| 10 | 6 | 0 | 2.467066  | 3.859401  | -0.143200 |
| 11 | 6 | 0 | 2.876613  | 2.980391  | 0.855506  |
| 12 | 1 | 0 | 3.490771  | 3.353517  | 1.670855  |
| 13 | 6 | 0 | 1.753795  | 1.094819  | -0.211047 |
| 14 | 6 | 0 | 2.792802  | 5.331258  | -0.077881 |
| 15 | 1 | 0 | 3.723459  | 5.511150  | 0.465774  |
| 16 | 1 | 0 | 2.893296  | 5.763273  | -1.076552 |
| 17 | 1 | 0 | 2.000611  | 5.884247  | 0.438915  |
| 18 | 7 | 0 | -0.137009 | -0.535319 | 0.540442  |
| 19 | 6 | 0 | -0.333162 | -0.582347 | 1.926134  |
| 20 | 6 | 0 | -1.387800 | -0.261357 | -0.030290 |
| 21 | 6 | 0 | -1.679651 | -0.260813 | 2.240438  |
| 22 | 6 | 0 | 0.546688  | -0.989618 | 2.934407  |
| 23 | 6 | 0 | -2.354882 | -0.055482 | 0.983382  |
| 24 | 6 | 0 | -2.112120 | -0.269440 | 3.569395  |
| 25 | 6 | 0 | 0.093192  | -0.996723 | 4.249259  |
| 26 | 1 | 0 | 1.550068  | -1.320587 | 2.706830  |
| 27 | 6 | 0 | -3.685479 | 0.207809  | 0.644568  |
| 28 | 6 | 0 | -1.219588 | -0.623855 | 4.572195  |
| 29 | 1 | 0 | -3.139034 | -0.018111 | 3.811665  |
| 30 | 1 | 0 | 0.767811  | -1.312792 | 5.037252  |
| 31 | 6 | 0 | -4.080671 | 0.240551  | -0.689609 |
| 32 | 1 | 0 | -4.419994 | 0.371607  | 1.427242  |
| 33 | 1 | 0 | -1.542950 | -0.638625 | 5.606518  |
| 34 | 6 | 0 | -3.113303 | -0.025862 | -1.679378 |
| 35 | 1 | 0 | -3.411684 | -0.047305 | -2.722136 |
| 36 | 6 | 0 | -1.783164 | -0.283916 | -1.371323 |
| 37 | 1 | 0 | -1.085520 | -0.523124 | -2.161551 |
| 38 | 6 | 0 | -5.528291 | 0.528767  | -1.063146 |
| 39 | 1 | 0 | -6.070270 | 0.687424  | -0.123640 |
| 40 | 6 | 0 | -5.663750 | 1.818153  | -1.893386 |
| 41 | 1 | 0 | -6.716182 | 2.041776  | -2.093581 |
| 42 | 1 | 0 | -5.227138 | 2.671561  | -1.368647 |
| 43 | 1 | 0 | -5.155063 | 1.724035  | -2.857577 |
| 44 | 6 | 0 | -6.192264 | -0.661589 | -1.778956 |
| 45 | 1 | 0 | -5.710036 | -0.867732 | -2.739230 |
| 46 | 1 | 0 | -6.130020 | -1.569283 | -1.173502 |
| 47 | 1 | 0 | -7.248504 | -0.454380 | -1.976557 |
| 48 | 6 | 0 | 1.407388  | 1.969091  | -1.268419 |
| 49 | 6 | 0 | 1.324070  | -2.991104 | -0.647772 |
| 50 | 6 | 0 | 0.000214  | -3.314030 | 0.016611  |
| 51 | 1 | 0 | -0.010882 | -3.051859 | 1.074809  |
| 52 | 1 | 0 | -0.838941 | -2.799764 | -0.452304 |
| 53 | 1 | 0 | -0.186780 | -4.386695 | -0.058905 |
| 54 | 6 | 0 | 0.718183  | 1.495701  | -2.531986 |
| 55 | 1 | 0 | 1.128490  | 2.016094  | -3.401615 |
| 56 | 1 | 0 | 0.854989  | 0.425343  | -2.702131 |
| 57 | 1 | 0 | -0.355387 | 1.695983  | -2.507971 |
| 58 | 6 | 0 | 2.546697  | 1.623437  | 0.835068  |
| 59 | 6 | 0 | 3.136266  | 0.762523  | 1.933715  |
| 60 | 1 | 0 | 2.544530  | 0.813595  | 2.850464  |
| 61 | 1 | 0 | 3.211198  | -0.287573 | 1.642044  |
| 62 | 1 | 0 | 4.146290  | 1.103111  | 2.177046  |
| 63 | 6 | 0 | 3.180187  | -1.579089 | -1.421383 |
| 64 | 6 | 0 | 3.952851  | -0.292989 | -1.629038 |

|    |   |   |          |           |           |
|----|---|---|----------|-----------|-----------|
| 65 | 1 | 0 | 3.394480 | 0.440545  | -2.210439 |
| 66 | 1 | 0 | 4.216779 | 0.192135  | -0.689458 |
| 67 | 1 | 0 | 4.878891 | -0.508499 | -2.164970 |
| 68 | 1 | 0 | 3.702610 | -4.845443 | -2.239522 |

-----

Compound 2b 2-RF-CxylN-TS

Method: b3lyp/6-311g(d,p)

SCF Done: E(RB3LYP) = -1319.86835509 A.U. after 1 cycles

Lowest frequency = -41.0863

Zero-point correction= 0.572811  
(Hartree/Particle)  
Thermal correction to Energy= 0.604214  
Thermal correction to Enthalpy= 0.605158  
Thermal correction to Gibbs Free Energy= 0.510217  
Sum of electronic and zero-point Energies= -1319.295544  
Sum of electronic and thermal Energies= -1319.264141  
Sum of electronic and thermal Enthalpies= -1319.263197  
Sum of electronic and thermal Free Energies= -1319.358138

Standard orientation:

| Center<br>Number | Atomic<br>Number | Atomic<br>Type | Coordinates (Angstroms) |           |           |
|------------------|------------------|----------------|-------------------------|-----------|-----------|
|                  |                  |                | X                       | Y         | Z         |
| 1                | 5                | 0              | 1.142900                | 0.225914  | -0.125817 |
| 2                | 6                | 0              | 5.153855                | -4.148365 | 0.071486  |
| 3                | 1                | 0              | 4.690070                | -5.122465 | 0.240519  |
| 4                | 1                | 0              | 5.744059                | -4.200431 | -0.846121 |
| 5                | 1                | 0              | 5.850245                | -3.968855 | 0.898256  |
| 6                | 6                | 0              | 4.123498                | -3.051874 | 0.002177  |
| 7                | 6                | 0              | 2.914492                | -3.154200 | 0.682974  |
| 8                | 1                | 0              | 2.710279                | -4.056513 | 1.250198  |
| 9                | 6                | 0              | 2.183677                | -0.934849 | -0.079635 |
| 10               | 6                | 0              | 4.356796                | -1.889027 | -0.726625 |
| 11               | 1                | 0              | 5.290000                | -1.791818 | -1.272060 |
| 12               | 6                | 0              | 0.788440                | 3.021082  | -2.843475 |
| 13               | 1                | 0              | 0.411885                | 3.108091  | -3.858071 |
| 14               | 6                | 0              | 1.262419                | 4.146080  | -2.184413 |
| 15               | 6                | 0              | 1.811902                | 4.000492  | -0.918896 |
| 16               | 1                | 0              | 2.242611                | 4.860306  | -0.414963 |
| 17               | 6                | 0              | 1.291606                | 1.616171  | -0.912428 |
| 18               | 7                | 0              | -0.174073               | 0.107882  | 0.629621  |
| 19               | 6                | 0              | -0.451658               | 0.666801  | 1.883122  |
| 20               | 6                | 0              | -1.408466               | -0.253606 | 0.072422  |
| 21               | 6                | 0              | -1.854807               | 0.737185  | 2.087313  |
| 22               | 6                | 0              | 0.427280                | 1.022829  | 2.911434  |
| 23               | 6                | 0              | -2.467093               | 0.145563  | 0.924035  |
| 24               | 6                | 0              | -2.365992               | 1.241196  | 3.286440  |
| 25               | 6                | 0              | -0.103507               | 1.515641  | 4.098824  |
| 26               | 1                | 0              | 1.495524                | 0.895763  | 2.808304  |
| 27               | 6                | 0              | -3.792591               | -0.136552 | 0.580288  |
| 28               | 6                | 0              | -1.487810               | 1.642659  | 4.284135  |
| 29               | 1                | 0              | -3.437833               | 1.301440  | 3.441219  |
| 30               | 1                | 0              | 0.570446                | 1.792302  | 4.902087  |
| 31               | 6                | 0              | -4.085167               | -0.838607 | -0.585375 |
| 32               | 1                | 0              | -4.599343               | 0.179113  | 1.234842  |
| 33               | 1                | 0              | -1.870840               | 2.031489  | 5.220467  |

|    |   |   |           |           |           |
|----|---|---|-----------|-----------|-----------|
| 34 | 6 | 0 | -3.012567 | -1.278206 | -1.387082 |
| 35 | 1 | 0 | -3.218973 | -1.864216 | -2.276371 |
| 36 | 6 | 0 | -1.686707 | -1.006228 | -1.072745 |
| 37 | 1 | 0 | -0.895517 | -1.399253 | -1.695467 |
| 38 | 6 | 0 | -5.527340 | -1.145959 | -0.964675 |
| 39 | 1 | 0 | -6.158483 | -0.711592 | -0.180723 |
| 40 | 6 | 0 | -5.927543 | -0.482146 | -2.294878 |
| 41 | 1 | 0 | -6.984917 | -0.659687 | -2.514342 |
| 42 | 1 | 0 | -5.762459 | 0.597601  | -2.260865 |
| 43 | 1 | 0 | -5.343498 | -0.882403 | -3.129141 |
| 44 | 6 | 0 | -5.811334 | -2.658775 | -0.994763 |
| 45 | 1 | 0 | -5.224256 | -3.158440 | -1.771181 |
| 46 | 1 | 0 | -5.563097 | -3.124856 | -0.037939 |
| 47 | 1 | 0 | -6.868288 | -2.850269 | -1.204120 |
| 48 | 6 | 0 | 0.806909  | 1.763141  | -2.234817 |
| 49 | 6 | 0 | 1.950746  | -2.145807 | 0.665355  |
| 50 | 6 | 0 | 0.703031  | -2.454067 | 1.469381  |
| 51 | 1 | 0 | 0.541251  | -1.739950 | 2.277208  |
| 52 | 1 | 0 | -0.198312 | -2.456990 | 0.856084  |
| 53 | 1 | 0 | 0.799603  | -3.443952 | 1.918870  |
| 54 | 6 | 0 | 0.356080  | 0.588935  | -3.079180 |
| 55 | 1 | 0 | 0.684473  | 0.722591  | -4.113520 |
| 56 | 1 | 0 | 0.772501  | -0.357766 | -2.727855 |
| 57 | 1 | 0 | -0.731868 | 0.492069  | -3.091819 |
| 58 | 6 | 0 | 1.845380  | 2.756949  | -0.281928 |
| 59 | 6 | 0 | 2.554053  | 2.693593  | 1.055589  |
| 60 | 1 | 0 | 1.906603  | 3.017561  | 1.873522  |
| 61 | 1 | 0 | 2.909986  | 1.687556  | 1.288455  |
| 62 | 1 | 0 | 3.426919  | 3.352066  | 1.049143  |
| 63 | 6 | 0 | 3.435869  | -0.844863 | -0.785031 |
| 64 | 6 | 0 | 3.867848  | 0.335236  | -1.630689 |
| 65 | 1 | 0 | 3.182901  | 0.529882  | -2.455909 |
| 66 | 1 | 0 | 3.931301  | 1.259038  | -1.055701 |
| 67 | 1 | 0 | 4.853869  | 0.138090  | -2.054969 |
| 68 | 1 | 0 | 1.239388  | 5.117237  | -2.666358 |

-----

Compound 3 GS1

Method: b3lyp/6-311g(d,p)

SCF Done: E(RB3LYP) = -1473.78422820 A.U. after 1 cycles

Lowest frequency = 18.4427

Zero-point correction= 0.631614  
(Hartree/Particle)  
Thermal correction to Energy= 0.669179  
Thermal correction to Enthalpy= 0.670124  
Thermal correction to Gibbs Free Energy= 0.558748  
Sum of electronic and zero-point Energies= -1473.152614  
Sum of electronic and thermal Energies= -1473.115049  
Sum of electronic and thermal Enthalpies= -1473.114105  
Sum of electronic and thermal Free Energies= -1473.225480

Standard orientation:

| Center<br>Number | Atomic<br>Number | Atomic<br>Type | Coordinates (Angstroms) |          |           |
|------------------|------------------|----------------|-------------------------|----------|-----------|
|                  |                  |                | X                       | Y        | Z         |
| 1                | 6                | 0              | 2.086419                | 1.457162 | -0.290470 |
| 2                | 6                | 0              | 2.478667                | 0.118145 | 0.094856  |

|    |   |   |           |           |           |
|----|---|---|-----------|-----------|-----------|
| 3  | 6 | 0 | 1.294446  | -0.639043 | 0.222557  |
| 4  | 7 | 0 | 0.162417  | 0.179836  | -0.050718 |
| 5  | 6 | 0 | 0.682542  | 1.471777  | -0.361462 |
| 6  | 6 | 0 | 0.020444  | 2.633088  | -0.772975 |
| 7  | 6 | 0 | 0.771638  | 3.760780  | -1.063221 |
| 8  | 6 | 0 | 2.175669  | 3.755405  | -0.969628 |
| 9  | 6 | 0 | 2.844213  | 2.596568  | -0.588393 |
| 10 | 6 | 0 | 3.724762  | -0.456202 | 0.348001  |
| 11 | 6 | 0 | 3.811595  | -1.791811 | 0.740294  |
| 12 | 6 | 0 | 2.618961  | -2.520775 | 0.881621  |
| 13 | 6 | 0 | 1.364210  | -1.967993 | 0.639043  |
| 14 | 6 | 0 | 5.154303  | -2.453251 | 1.020781  |
| 15 | 6 | 0 | 6.043380  | -2.506983 | -0.234847 |
| 16 | 6 | 0 | 5.893936  | -1.785833 | 2.194345  |
| 17 | 8 | 0 | 2.784388  | 4.938001  | -1.284880 |
| 18 | 6 | 0 | 4.199718  | 5.002921  | -1.218538 |
| 19 | 1 | 0 | -1.054932 | 2.670144  | -0.861399 |
| 20 | 1 | 0 | 0.288636  | 4.677940  | -1.377055 |
| 21 | 1 | 0 | 3.923375  | 2.558116  | -0.527321 |
| 22 | 1 | 0 | 4.622377  | 0.144546  | 0.244278  |
| 23 | 1 | 0 | 2.674294  | -3.557699 | 1.197287  |
| 24 | 1 | 0 | 0.476159  | -2.568371 | 0.768017  |
| 25 | 1 | 0 | 4.942211  | -3.487484 | 1.314869  |
| 26 | 1 | 0 | 6.973857  | -3.044333 | -0.027721 |
| 27 | 1 | 0 | 5.532925  | -3.013382 | -1.057812 |
| 28 | 1 | 0 | 6.308842  | -1.501755 | -0.575803 |
| 29 | 1 | 0 | 6.822765  | -2.318731 | 2.419486  |
| 30 | 1 | 0 | 5.277070  | -1.779250 | 3.096393  |
| 31 | 1 | 0 | 6.154244  | -0.748991 | 1.961251  |
| 32 | 1 | 0 | 4.465777  | 6.020547  | -1.500404 |
| 33 | 1 | 0 | 4.668932  | 4.300734  | -1.917647 |
| 34 | 1 | 0 | 4.565345  | 4.801845  | -0.204722 |
| 35 | 5 | 0 | -1.229045 | -0.214333 | -0.011177 |
| 36 | 6 | 0 | -1.625375 | -1.726590 | -0.275256 |
| 37 | 6 | 0 | -1.270351 | -2.343414 | -1.501442 |
| 38 | 6 | 0 | -2.401067 | -2.474402 | 0.645861  |
| 39 | 6 | 0 | -1.693907 | -3.645822 | -1.777388 |
| 40 | 6 | 0 | -2.781680 | -3.782279 | 0.341248  |
| 41 | 6 | 0 | -2.443271 | -4.388935 | -0.868161 |
| 42 | 1 | 0 | -1.428086 | -4.090899 | -2.732134 |
| 43 | 1 | 0 | -3.367011 | -4.340014 | 1.066890  |
| 44 | 6 | 0 | -2.343753 | 0.870921  | 0.294331  |
| 45 | 6 | 0 | -3.443817 | 1.087193  | -0.573098 |
| 46 | 6 | 0 | -2.298764 | 1.603608  | 1.507569  |
| 47 | 6 | 0 | -4.434304 | 2.009533  | -0.231489 |
| 48 | 6 | 0 | -3.324356 | 2.498254  | 1.822581  |
| 49 | 6 | 0 | -4.398300 | 2.725318  | 0.964862  |
| 50 | 1 | 0 | -5.262334 | 2.166867  | -0.916894 |
| 51 | 1 | 0 | -3.279630 | 3.033428  | 2.766980  |
| 52 | 6 | 0 | -2.812430 | -1.912545 | 1.990198  |
| 53 | 1 | 0 | -1.944621 | -1.618340 | 2.588082  |
| 54 | 1 | 0 | -3.444600 | -1.028648 | 1.883981  |
| 55 | 1 | 0 | -3.365988 | -2.657238 | 2.565453  |
| 56 | 6 | 0 | -0.431112 | -1.646509 | -2.553534 |
| 57 | 1 | 0 | -0.679220 | -0.589975 | -2.664740 |
| 58 | 1 | 0 | 0.633400  | -1.699582 | -2.305062 |
| 59 | 1 | 0 | -0.565451 | -2.123856 | -3.526593 |
| 60 | 6 | 0 | -2.856266 | -5.809047 | -1.169122 |
| 61 | 1 | 0 | -2.901242 | -5.991847 | -2.245078 |
| 62 | 1 | 0 | -2.142234 | -6.523673 | -0.744686 |



|    |   |   |           |           |           |
|----|---|---|-----------|-----------|-----------|
| 63 | 1 | 0 | -3.836480 | -6.038162 | -0.743597 |
| 64 | 6 | 0 | -1.165657 | 1.464678  | 2.504404  |
| 65 | 1 | 0 | -0.819614 | 0.435893  | 2.614369  |
| 66 | 1 | 0 | -0.300009 | 2.061612  | 2.201011  |
| 67 | 1 | 0 | -1.478817 | 1.817344  | 3.489427  |
| 68 | 6 | 0 | -3.573772 | 0.368833  | -1.899488 |
| 69 | 1 | 0 | -2.713316 | 0.557900  | -2.548268 |
| 70 | 1 | 0 | -3.647012 | -0.712749 | -1.769155 |
| 71 | 1 | 0 | -4.463853 | 0.706250  | -2.434085 |
| 72 | 6 | 0 | -5.473794 | 3.727774  | 1.305624  |
| 73 | 1 | 0 | -5.245356 | 4.709311  | 0.875422  |
| 74 | 1 | 0 | -6.445812 | 3.419153  | 0.913057  |
| 75 | 1 | 0 | -5.568957 | 3.859006  | 2.385898  |

-----

Compound 3 GS2

Method: b3lyp/6-311g(d,p)

SCF Done: E(RB3LYP) = -1473.78443155 A.U. after 1 cycles

Lowest frequency = 19.0168

Zero-point correction= 0.631665  
(Hartree/Particle)  
Thermal correction to Energy= 0.669208  
Thermal correction to Enthalpy= 0.670152  
Thermal correction to Gibbs Free Energy= 0.559203  
Sum of electronic and zero-point Energies= -1473.152767  
Sum of electronic and thermal Energies= -1473.115224  
Sum of electronic and thermal Enthalpies= -1473.114280  
Sum of electronic and thermal Free Energies= -1473.225229

Standard orientation:

| Center<br>Number | Atomic<br>Number | Atomic<br>Type | Coordinates (Angstroms) |           |           |
|------------------|------------------|----------------|-------------------------|-----------|-----------|
|                  |                  |                | X                       | Y         | Z         |
| 1                | 6                | 0              | 1.807684                | 1.900394  | -0.294323 |
| 2                | 6                | 0              | 2.440930                | 0.648746  | 0.060489  |
| 3                | 6                | 0              | 1.418035                | -0.313297 | 0.181283  |
| 4                | 7                | 0              | 0.152432                | 0.288781  | -0.066833 |
| 5                | 6                | 0              | 0.423748                | 1.659560  | -0.354753 |
| 6                | 6                | 0              | -0.443872               | 2.687790  | -0.737267 |
| 7                | 6                | 0              | 0.085534                | 3.939066  | -1.009556 |
| 8                | 6                | 0              | 1.467963                | 4.188693  | -0.926169 |
| 9                | 6                | 0              | 2.341268                | 3.164848  | -0.573900 |
| 10               | 6                | 0              | 3.774697                | 0.303465  | 0.294126  |
| 11               | 6                | 0              | 4.107861                | -0.997847 | 0.658613  |
| 12               | 6                | 0              | 3.068313                | -1.937586 | 0.794712  |
| 13               | 6                | 0              | 1.734152                | -1.616435 | 0.571429  |
| 14               | 6                | 0              | 5.558041                | -1.385710 | 0.911481  |
| 15               | 6                | 0              | 5.791420                | -1.834812 | 2.365392  |
| 16               | 6                | 0              | 6.050749                | -2.452447 | -0.083206 |
| 17               | 8                | 0              | 1.846599                | 5.468584  | -1.221176 |
| 18               | 6                | 0              | 3.226767                | 5.790388  | -1.163443 |
| 19               | 1                | 0              | -1.508874               | 2.529358  | -0.816932 |
| 20               | 1                | 0              | -0.560194               | 4.758351  | -1.300702 |
| 21               | 1                | 0              | 3.409883                | 3.323232  | -0.521231 |
| 22               | 1                | 0              | 4.554235                | 1.052941  | 0.197896  |
| 23               | 1                | 0              | 3.305408                | -2.954191 | 1.089145  |
| 24               | 1                | 0              | 0.970493                | -2.369763 | 0.694417  |

|    |   |   |           |           |           |
|----|---|---|-----------|-----------|-----------|
| 25 | 1 | 0 | 6.159399  | -0.483893 | 0.747790  |
| 26 | 1 | 0 | 6.851160  | -2.044537 | 2.539590  |
| 27 | 1 | 0 | 5.475720  | -1.062881 | 3.071634  |
| 28 | 1 | 0 | 5.230787  | -2.745791 | 2.594676  |
| 29 | 1 | 0 | 7.111867  | -2.667892 | 0.075018  |
| 30 | 1 | 0 | 5.920701  | -2.118401 | -1.115612 |
| 31 | 1 | 0 | 5.499972  | -3.390203 | 0.035471  |
| 32 | 1 | 0 | 3.299062  | 6.844722  | -1.426056 |
| 33 | 1 | 0 | 3.809079  | 5.199476  | -1.880179 |
| 34 | 1 | 0 | 3.633897  | 5.640423  | -0.156618 |
| 35 | 5 | 0 | -1.143204 | -0.353995 | -0.025386 |
| 36 | 6 | 0 | -1.259732 | -1.907847 | -0.317979 |
| 37 | 6 | 0 | -0.810619 | -2.426215 | -1.558851 |
| 38 | 6 | 0 | -1.877141 | -2.802061 | 0.592399  |
| 39 | 6 | 0 | -0.992051 | -3.778670 | -1.858554 |
| 40 | 6 | 0 | -2.015674 | -4.151434 | 0.263582  |
| 41 | 6 | 0 | -1.584066 | -4.663205 | -0.959986 |
| 42 | 1 | 0 | -0.659202 | -4.149530 | -2.823942 |
| 43 | 1 | 0 | -2.482492 | -4.820249 | 0.981214  |
| 44 | 6 | 0 | -2.433753 | 0.503142  | 0.311038  |
| 45 | 6 | 0 | -3.564117 | 0.531437  | -0.543938 |
| 46 | 6 | 0 | -2.510537 | 1.207114  | 1.539558  |
| 47 | 6 | 0 | -4.703254 | 1.248911  | -0.175183 |
| 48 | 6 | 0 | -3.679447 | 1.891477  | 1.881314  |
| 49 | 6 | 0 | -4.786229 | 1.934478  | 1.036445  |
| 50 | 1 | 0 | -5.553509 | 1.265486  | -0.851160 |
| 51 | 1 | 0 | -3.723331 | 2.406588  | 2.836840  |
| 52 | 6 | 0 | -2.371955 | -2.350242 | 1.950025  |
| 53 | 1 | 0 | -1.567187 | -1.913951 | 2.549289  |
| 54 | 1 | 0 | -3.155614 | -1.594748 | 1.864749  |
| 55 | 1 | 0 | -2.775421 | -3.194164 | 2.512985  |
| 56 | 6 | 0 | -0.123850 | -1.568289 | -2.602567 |
| 57 | 1 | 0 | -0.558221 | -0.571148 | -2.686953 |
| 58 | 1 | 0 | 0.936361  | -1.435279 | -2.365845 |
| 59 | 1 | 0 | -0.184009 | -2.041492 | -3.585025 |
| 60 | 6 | 0 | -1.733944 | -6.128896 | -1.287301 |
| 61 | 1 | 0 | -1.755503 | -6.296388 | -2.366467 |
| 62 | 1 | 0 | -0.897272 | -6.708967 | -0.882121 |
| 63 | 1 | 0 | -2.651588 | -6.541243 | -0.860362 |
| 64 | 6 | 0 | -1.360402 | 1.258499  | 2.525132  |
| 65 | 1 | 0 | -0.829517 | 0.309117  | 2.609341  |
| 66 | 1 | 0 | -0.623021 | 2.011178  | 2.229385  |
| 67 | 1 | 0 | -1.722351 | 1.526517  | 3.520060  |
| 68 | 6 | 0 | -3.574277 | -0.171152 | -1.885039 |
| 69 | 1 | 0 | -2.770629 | 0.186599  | -2.535612 |
| 70 | 1 | 0 | -3.445613 | -1.250136 | -1.778300 |
| 71 | 1 | 0 | -4.517179 | 0.007304  | -2.405581 |
| 72 | 6 | 0 | -6.023900 | 2.714638  | 1.406910  |
| 73 | 1 | 0 | -5.984986 | 3.729807  | 0.996326  |
| 74 | 1 | 0 | -6.926890 | 2.240006  | 1.015096  |
| 75 | 1 | 0 | -6.129275 | 2.804566  | 2.490457  |

-----

Compound 3 GS3

Method: b3lyp/6-311g(d,p)

SCF Done: E(RB3LYP) = -1473.78366077 A.U. after 1 cycles

Lowest frequency = 18.1338

Zero-point correction= 0.631589  
 (Hartree/Particle)  
 Thermal correction to Energy= 0.669184  
 Thermal correction to Enthalpy= 0.670128  
 Thermal correction to Gibbs Free Energy= 0.558525  
 Sum of electronic and zero-point Energies= -1473.152072  
 Sum of electronic and thermal Energies= -1473.114477  
 Sum of electronic and thermal Enthalpies= -1473.113533  
 Sum of electronic and thermal Free Energies= -1473.225135

Standard orientation:

| Center<br>Number | Atomic<br>Number | Atomic<br>Type | Coordinates (Angstroms) |           |           |
|------------------|------------------|----------------|-------------------------|-----------|-----------|
|                  |                  |                | X                       | Y         | Z         |
| 1                | 6                | 0              | 1.947056                | 1.699290  | -0.257403 |
| 2                | 6                | 0              | 2.513091                | 0.413670  | 0.096780  |
| 3                | 6                | 0              | 1.439460                | -0.493362 | 0.216146  |
| 4                | 7                | 0              | 0.205295                | 0.173873  | -0.032505 |
| 5                | 6                | 0              | 0.546506                | 1.530921  | -0.319022 |
| 6                | 6                | 0              | -0.260508               | 2.599719  | -0.696032 |
| 7                | 6                | 0              | 0.330762                | 3.834197  | -0.968018 |
| 8                | 6                | 0              | 1.720917                | 4.005446  | -0.883446 |
| 9                | 6                | 0              | 2.535349                | 2.929037  | -0.533141 |
| 10               | 6                | 0              | 3.825665                | 0.004638  | 0.330487  |
| 11               | 6                | 0              | 4.090891                | -1.315212 | 0.695933  |
| 12               | 6                | 0              | 3.005380                | -2.196556 | 0.829968  |
| 13               | 6                | 0              | 1.686649                | -1.809230 | 0.605677  |
| 14               | 6                | 0              | 5.511128                | -1.798748 | 0.956477  |
| 15               | 6                | 0              | 6.391171                | -1.706312 | -0.303231 |
| 16               | 6                | 0              | 6.162926                | -1.064091 | 2.141945  |
| 17               | 8                | 0              | 2.369165                | 5.183444  | -1.135092 |
| 18               | 6                | 0              | 1.598815                | 6.315902  | -1.504964 |
| 19               | 1                | 0              | -1.332440               | 2.498467  | -0.775797 |
| 20               | 1                | 0              | -0.308731               | 4.658852  | -1.251433 |
| 21               | 1                | 0              | 3.607911                | 3.074438  | -0.491904 |
| 22               | 1                | 0              | 4.633984                | 0.721599  | 0.232535  |
| 23               | 1                | 0              | 3.198783                | -3.222917 | 1.125228  |
| 24               | 1                | 0              | 0.886475                | -2.523552 | 0.728701  |
| 25               | 1                | 0              | 5.439957                | -2.858136 | 1.228184  |
| 26               | 1                | 0              | 7.386386                | -2.118623 | -0.111026 |
| 27               | 1                | 0              | 5.947814                | -2.258972 | -1.135298 |
| 28               | 1                | 0              | 6.517715                | -0.667660 | -0.622943 |
| 29               | 1                | 0              | 7.155528                | -1.473846 | 2.352223  |
| 30               | 1                | 0              | 5.556217                | -1.158624 | 3.045976  |
| 31               | 1                | 0              | 6.282067                | 0.002757  | 1.930694  |
| 32               | 1                | 0              | 2.311972                | 7.126017  | -1.650222 |
| 33               | 1                | 0              | 0.889731                | 6.597450  | -0.717870 |
| 34               | 1                | 0              | 1.052316                | 6.145860  | -2.439881 |
| 35               | 5                | 0              | -1.120115               | -0.401983 | 0.004327  |
| 36               | 6                | 0              | -1.316655               | -1.948404 | -0.286890 |
| 37               | 6                | 0              | -0.891357               | -2.490362 | -1.526139 |
| 38               | 6                | 0              | -1.983997               | -2.808562 | 0.621123  |
| 39               | 6                | 0              | -1.143309               | -3.831371 | -1.826450 |
| 40               | 6                | 0              | -2.192961               | -4.148712 | 0.291821  |
| 41               | 6                | 0              | -1.784748               | -4.683025 | -0.930122 |
| 42               | 1                | 0              | -0.826935               | -4.219602 | -2.790562 |
| 43               | 1                | 0              | -2.697229               | -4.791569 | 1.007839  |
| 44               | 6                | 0              | -2.368032               | 0.520411  | 0.333189  |
| 45               | 6                | 0              | -3.488899               | 0.609279  | -0.529691 |

|    |   |   |           |           |           |
|----|---|---|-----------|-----------|-----------|
| 46 | 6 | 0 | -2.417828 | 1.223746  | 1.563424  |
| 47 | 6 | 0 | -4.593048 | 1.382488  | -0.166577 |
| 48 | 6 | 0 | -3.552919 | 1.965581  | 1.899395  |
| 49 | 6 | 0 | -4.650169 | 2.067168  | 1.047001  |
| 50 | 1 | 0 | -5.436655 | 1.443733  | -0.848360 |
| 51 | 1 | 0 | -3.577636 | 2.478866  | 2.856628  |
| 52 | 6 | 0 | -2.459120 | -2.331103 | 1.976928  |
| 53 | 1 | 0 | -1.634261 | -1.939614 | 2.579762  |
| 54 | 1 | 0 | -3.200146 | -1.534048 | 1.888840  |
| 55 | 1 | 0 | -2.910264 | -3.152019 | 2.537705  |
| 56 | 6 | 0 | -0.155098 | -1.671200 | -2.567195 |
| 57 | 1 | 0 | -0.530397 | -0.650250 | -2.649522 |
| 58 | 1 | 0 | 0.910746  | -1.600804 | -2.328822 |
| 59 | 1 | 0 | -0.241248 | -2.137880 | -3.550857 |
| 60 | 6 | 0 | -2.011036 | -6.138779 | -1.257900 |
| 61 | 1 | 0 | -2.036947 | -6.305269 | -2.337131 |
| 62 | 1 | 0 | -1.208122 | -6.762408 | -0.849149 |
| 63 | 1 | 0 | -2.951107 | -6.501586 | -0.834775 |
| 64 | 6 | 0 | -1.272681 | 1.214438  | 2.555940  |
| 65 | 1 | 0 | -0.794733 | 0.237749  | 2.644607  |
| 66 | 1 | 0 | -0.493594 | 1.925062  | 2.263105  |
| 67 | 1 | 0 | -1.625150 | 1.503558  | 3.548361  |
| 68 | 6 | 0 | -3.524701 | -0.088347 | -1.872905 |
| 69 | 1 | 0 | -2.696954 | 0.227091  | -2.515067 |
| 70 | 1 | 0 | -3.454956 | -1.172943 | -1.767936 |
| 71 | 1 | 0 | -4.451995 | 0.141428  | -2.401377 |
| 72 | 6 | 0 | -5.850071 | 2.906724  | 1.412236  |
| 73 | 1 | 0 | -5.759137 | 3.919916  | 1.004855  |
| 74 | 1 | 0 | -6.773017 | 2.478153  | 1.013873  |
| 75 | 1 | 0 | -5.957522 | 2.998898  | 2.495394  |

-----

Compound 3 GS4

Method: b3lyp/6-311g(d,p)

SCF Done: E(RB3LYP) = -1473.78384398 A.U. after 1 cycles

Lowest frequency = 19.3053

Zero-point correction= 0.631710  
(Hartree/Particle)  
Thermal correction to Energy= 0.669227  
Thermal correction to Enthalpy= 0.670171  
Thermal correction to Gibbs Free Energy= 0.559276  
Sum of electronic and zero-point Energies= -1473.152134  
Sum of electronic and thermal Energies= -1473.114617  
Sum of electronic and thermal Enthalpies= -1473.113673  
Sum of electronic and thermal Free Energies= -1473.224568

Standard orientation:

| Center<br>Number | Atomic<br>Number | Atomic<br>Type | Coordinates (Angstroms) |          |           |
|------------------|------------------|----------------|-------------------------|----------|-----------|
|                  |                  |                | X                       | Y        | Z         |
| 1                | 6                | 0              | 1.272574                | 2.335538 | -0.262634 |
| 2                | 6                | 0              | 2.235412                | 1.304854 | 0.065337  |
| 3                | 6                | 0              | 1.524699                | 0.094165 | 0.179971  |
| 4                | 7                | 0              | 0.136177                | 0.317908 | -0.045937 |
| 5                | 6                | 0              | 0.005165                | 1.714488 | -0.313712 |
| 6                | 6                | 0              | -1.114867               | 2.460747 | -0.666428 |
| 7                | 6                | 0              | -0.968329               | 3.824312 | -0.924557 |

|    |   |   |           |           |           |
|----|---|---|-----------|-----------|-----------|
| 8  | 6 | 0 | 0.288421  | 4.444338  | -0.850260 |
| 9  | 6 | 0 | 1.417648  | 3.693918  | -0.524552 |
| 10 | 6 | 0 | 3.614832  | 1.346193  | 0.280691  |
| 11 | 6 | 0 | 4.305008  | 0.186347  | 0.621770  |
| 12 | 6 | 0 | 3.572578  | -1.008594 | 0.752772  |
| 13 | 6 | 0 | 2.198953  | -1.072567 | 0.546579  |
| 14 | 6 | 0 | 5.808884  | 0.218578  | 0.855460  |
| 15 | 6 | 0 | 6.177598  | -0.162081 | 2.300843  |
| 16 | 6 | 0 | 6.568151  | -0.656589 | -0.158313 |
| 17 | 8 | 0 | 0.507273  | 5.773344  | -1.089515 |
| 18 | 6 | 0 | -0.598824 | 6.591229  | -1.436237 |
| 19 | 1 | 0 | -2.094187 | 2.011819  | -0.737841 |
| 20 | 1 | 0 | -1.848082 | 4.394710  | -1.189074 |
| 21 | 1 | 0 | 2.382472  | 4.185061  | -0.491251 |
| 22 | 1 | 0 | 4.149301  | 2.286459  | 0.188343  |
| 23 | 1 | 0 | 4.089097  | -1.921292 | 1.029656  |
| 24 | 1 | 0 | 1.679367  | -2.011605 | 0.664926  |
| 25 | 1 | 0 | 6.130618  | 1.254552  | 0.698357  |
| 26 | 1 | 0 | 7.255760  | -0.067542 | 2.462023  |
| 27 | 1 | 0 | 5.667273  | 0.482867  | 3.020499  |
| 28 | 1 | 0 | 5.898260  | -1.196235 | 2.523008  |
| 29 | 1 | 0 | 7.649017  | -0.566628 | -0.013314 |
| 30 | 1 | 0 | 6.336038  | -0.361956 | -1.184784 |
| 31 | 1 | 0 | 6.304689  | -1.712572 | -0.046849 |
| 32 | 1 | 0 | -0.195479 | 7.593129  | -1.575852 |
| 33 | 1 | 0 | -1.350929 | 6.613930  | -0.639110 |
| 34 | 1 | 0 | -1.070434 | 6.260175  | -2.368783 |
| 35 | 5 | 0 | -0.923297 | -0.665213 | -0.007315 |
| 36 | 6 | 0 | -0.600258 | -2.184589 | -0.325723 |
| 37 | 6 | 0 | -0.036938 | -2.536185 | -1.578410 |
| 38 | 6 | 0 | -0.931685 | -3.230792 | 0.571657  |
| 39 | 6 | 0 | 0.165233  | -3.880287 | -1.901852 |
| 40 | 6 | 0 | -0.689806 | -4.559341 | 0.218877  |
| 41 | 6 | 0 | -0.145259 | -4.909746 | -1.016449 |
| 42 | 1 | 0 | 0.578681  | -4.127191 | -2.875717 |
| 43 | 1 | 0 | -0.942322 | -5.343649 | 0.926923  |
| 44 | 6 | 0 | -2.400855 | -0.212497 | 0.349588  |
| 45 | 6 | 0 | -3.500767 | -0.488867 | -0.500473 |
| 46 | 6 | 0 | -2.661884 | 0.420397  | 1.591442  |
| 47 | 6 | 0 | -4.792716 | -0.127381 | -0.114350 |
| 48 | 6 | 0 | -3.973085 | 0.742283  | 1.950157  |
| 49 | 6 | 0 | -5.054690 | 0.486279  | 1.110198  |
| 50 | 1 | 0 | -5.619178 | -0.340108 | -0.786620 |
| 51 | 1 | 0 | -4.151871 | 1.207367  | 2.915606  |
| 52 | 6 | 0 | -1.517075 | -2.957817 | 1.940897  |
| 53 | 1 | 0 | -0.855934 | -2.329130 | 2.544934  |
| 54 | 1 | 0 | -2.478646 | -2.444710 | 1.875939  |
| 55 | 1 | 0 | -1.667590 | -3.890456 | 2.488094  |
| 56 | 6 | 0 | 0.371360  | -1.503806 | -2.610134 |
| 57 | 1 | 0 | -0.321364 | -0.663189 | -2.669111 |
| 58 | 1 | 0 | 1.357568  | -1.088457 | -2.380481 |
| 59 | 1 | 0 | 0.429346  | -1.957689 | -3.601814 |
| 60 | 6 | 0 | 0.118438  | -6.353182 | -1.369744 |
| 61 | 1 | 0 | 0.135121  | -6.502409 | -2.451669 |
| 62 | 1 | 0 | 1.087601  | -6.682180 | -0.978408 |
| 63 | 1 | 0 | -0.643201 | -7.013009 | -0.946731 |
| 64 | 6 | 0 | -1.563423 | 0.776502  | 2.572860  |
| 65 | 1 | 0 | -0.792403 | 0.007941  | 2.644763  |
| 66 | 1 | 0 | -1.062018 | 1.704703  | 2.281839  |
| 67 | 1 | 0 | -1.978032 | 0.926045  | 3.572076  |

|    |   |   |           |           |           |
|----|---|---|-----------|-----------|-----------|
| 68 | 6 | 0 | -3.324366 | -1.144492 | -1.853747 |
| 69 | 1 | 0 | -2.655579 | -0.567493 | -2.499350 |
| 70 | 1 | 0 | -2.900584 | -2.146952 | -1.765813 |
| 71 | 1 | 0 | -4.283155 | -1.226592 | -2.369434 |
| 72 | 6 | 0 | -6.458788 | 0.879108  | 1.500322  |
| 73 | 1 | 0 | -6.712305 | 1.870628  | 1.108661  |
| 74 | 1 | 0 | -7.194752 | 0.175359  | 1.103734  |
| 75 | 1 | 0 | -6.575140 | 0.917466  | 2.585800  |

-----

Compound 3 1-RF-C-TSaa

Method: b3lyp/6-311g(d,p)

SCF Done: E(RB3LYP) = -1473.71239452 A.U. after 1 cycles

Lowest frequency = -40.1649

Zero-point correction= 0.631600  
(Hartree/Particle)  
Thermal correction to Energy= 0.667619  
Thermal correction to Enthalpy= 0.668563  
Thermal correction to Gibbs Free Energy= 0.563178  
Sum of electronic and zero-point Energies= -1473.080795  
Sum of electronic and thermal Energies= -1473.044776  
Sum of electronic and thermal Enthalpies= -1473.043832  
Sum of electronic and thermal Free Energies= -1473.149216

Standard orientation:

| Center<br>Number | Atomic<br>Number | Atomic<br>Type | Coordinates (Angstroms) |           |           |
|------------------|------------------|----------------|-------------------------|-----------|-----------|
|                  |                  |                | X                       | Y         | Z         |
| 1                | 6                | 0              | 2.556745                | -0.198082 | -0.207533 |
| 2                | 6                | 0              | 1.973494                | 1.052090  | 0.233746  |
| 3                | 6                | 0              | 0.651687                | 1.089051  | -0.261862 |
| 4                | 7                | 0              | 0.288912                | -0.214712 | -0.780702 |
| 5                | 6                | 0              | 1.552439                | -0.873753 | -0.924204 |
| 6                | 6                | 0              | 1.937759                | -1.822769 | -1.866835 |
| 7                | 6                | 0              | 3.259792                | -2.243050 | -1.916276 |
| 8                | 6                | 0              | 4.228691                | -1.687199 | -1.064628 |
| 9                | 6                | 0              | 3.888210                | -0.623161 | -0.230986 |
| 10               | 6                | 0              | 2.554225                | 2.170050  | 0.833251  |
| 11               | 6                | 0              | 1.856687                | 3.373820  | 0.897823  |
| 12               | 6                | 0              | 0.586469                | 3.424350  | 0.301545  |
| 13               | 6                | 0              | -0.017502               | 2.312319  | -0.281990 |
| 14               | 6                | 0              | 2.479338                | 4.601217  | 1.547584  |
| 15               | 6                | 0              | 2.688626                | 5.747823  | 0.541927  |
| 16               | 6                | 0              | 1.669522                | 5.076409  | 2.767617  |
| 17               | 8                | 0              | 5.485048                | -2.208214 | -1.186098 |
| 18               | 6                | 0              | 6.522876                | -1.653892 | -0.392601 |
| 19               | 1                | 0              | 1.235606                | -2.200342 | -2.592453 |
| 20               | 1                | 0              | 3.580456                | -2.983926 | -2.638245 |
| 21               | 1                | 0              | 4.638053                | -0.083070 | 0.330983  |
| 22               | 1                | 0              | 3.568015                | 2.111867  | 1.217482  |
| 23               | 1                | 0              | 0.049241                | 4.366210  | 0.267930  |
| 24               | 1                | 0              | -0.975023               | 2.425497  | -0.760688 |
| 25               | 1                | 0              | 3.469143                | 4.299424  | 1.909616  |
| 26               | 1                | 0              | 3.196924                | 6.591601  | 1.018485  |
| 27               | 1                | 0              | 3.292899                | 5.421033  | -0.307992 |
| 28               | 1                | 0              | 1.734440                | 6.113332  | 0.151307  |
| 29               | 1                | 0              | 2.167343                | 5.917819  | 3.259297  |

|    |   |   |           |           |           |
|----|---|---|-----------|-----------|-----------|
| 30 | 1 | 0 | 1.553099  | 4.273629  | 3.500022  |
| 31 | 1 | 0 | 0.669011  | 5.407190  | 2.473444  |
| 32 | 1 | 0 | 7.415847  | -2.233152 | -0.622335 |
| 33 | 1 | 0 | 6.300513  | -1.739958 | 0.677170  |
| 34 | 1 | 0 | 6.702674  | -0.601521 | -0.641329 |
| 35 | 5 | 0 | -1.065736 | -0.775066 | -0.551817 |
| 36 | 6 | 0 | -2.220778 | 0.313371  | -0.711906 |
| 37 | 6 | 0 | -2.734767 | 1.103166  | 0.336347  |
| 38 | 6 | 0 | -2.739121 | 0.506446  | -2.013727 |
| 39 | 6 | 0 | -3.742625 | 2.036758  | 0.076009  |
| 40 | 6 | 0 | -3.744888 | 1.447048  | -2.237556 |
| 41 | 6 | 0 | -4.266355 | 2.224461  | -1.200977 |
| 42 | 1 | 0 | -4.125781 | 2.636392  | 0.897841  |
| 43 | 1 | 0 | -4.131024 | 1.576454  | -3.245061 |
| 44 | 6 | 0 | -1.422829 | -2.222040 | 0.051664  |
| 45 | 6 | 0 | -0.582578 | -3.383011 | 0.145286  |
| 46 | 6 | 0 | -2.563396 | -2.281155 | 0.928981  |
| 47 | 6 | 0 | -0.594898 | -4.188948 | 1.279718  |
| 48 | 6 | 0 | -2.545286 | -3.111428 | 2.056640  |
| 49 | 6 | 0 | -1.513150 | -4.004801 | 2.313108  |
| 50 | 1 | 0 | 0.088509  | -5.032938 | 1.321274  |
| 51 | 1 | 0 | -3.399576 | -3.082607 | 2.727298  |
| 52 | 6 | 0 | -2.216590 | -0.304050 | -3.181702 |
| 53 | 1 | 0 | -1.153371 | -0.112290 | -3.356487 |
| 54 | 1 | 0 | -2.326797 | -1.379325 | -3.004682 |
| 55 | 1 | 0 | -2.754714 | -0.063009 | -4.100653 |
| 56 | 6 | 0 | -2.207097 | 1.016678  | 1.753911  |
| 57 | 1 | 0 | -1.630313 | 0.109078  | 1.932707  |
| 58 | 1 | 0 | -1.554796 | 1.866787  | 1.974389  |
| 59 | 1 | 0 | -3.026516 | 1.040639  | 2.478331  |
| 60 | 6 | 0 | -5.377656 | 3.214321  | -1.456444 |
| 61 | 1 | 0 | -5.423993 | 3.972901  | -0.671874 |
| 62 | 1 | 0 | -5.245219 | 3.724629  | -2.414108 |
| 63 | 1 | 0 | -6.351801 | 2.713749  | -1.487617 |
| 64 | 6 | 0 | -3.917187 | -1.640382 | 0.663706  |
| 65 | 1 | 0 | -4.150249 | -0.812515 | 1.334541  |
| 66 | 1 | 0 | -4.032664 | -1.288953 | -0.356000 |
| 67 | 1 | 0 | -4.672127 | -2.413799 | 0.836724  |
| 68 | 6 | 0 | 0.139256  | -3.980887 | -1.044226 |
| 69 | 1 | 0 | -0.097110 | -3.459804 | -1.967180 |
| 70 | 1 | 0 | 1.220594  | -4.034382 | -0.923883 |
| 71 | 1 | 0 | -0.228724 | -5.005263 | -1.163472 |
| 72 | 6 | 0 | -1.453346 | -4.813705 | 3.581543  |
| 73 | 1 | 0 | -2.439143 | -4.912191 | 4.041881  |
| 74 | 1 | 0 | -1.056273 | -5.815777 | 3.400463  |
| 75 | 1 | 0 | -0.795852 | -4.331773 | 4.313944  |

-----  
Compound 3 1-RF-C-TSab

Method: b3lyp/6-311g(d,p)

SCF Done: E(RB3LYP) = -1473.71226508 A.U. after 1 cycles

Lowest frequency = -41.2846

|                                            |              |
|--------------------------------------------|--------------|
| Zero-point correction=                     | 0.631543     |
| (Hartree/Particle)                         |              |
| Thermal correction to Energy=              | 0.667579     |
| Thermal correction to Enthalpy=            | 0.668523     |
| Thermal correction to Gibbs Free Energy=   | 0.562919     |
| Sum of electronic and zero-point Energies= | -1473.080722 |

Sum of electronic and thermal Energies= -1473.044686  
 Sum of electronic and thermal Enthalpies= -1473.043742  
 Sum of electronic and thermal Free Energies= -1473.149347

Standard orientation:

| Center<br>Number | Atomic<br>Number | Atomic<br>Type | Coordinates (Angstroms) |           |           |
|------------------|------------------|----------------|-------------------------|-----------|-----------|
|                  |                  |                | X                       | Y         | Z         |
| 1                | 6                | 0              | 2.435482                | -0.484763 | -0.291105 |
| 2                | 6                | 0              | 2.036157                | 0.833337  | 0.159864  |
| 3                | 6                | 0              | 0.719056                | 1.047824  | -0.308605 |
| 4                | 7                | 0              | 0.172845                | -0.197081 | -0.811990 |
| 5                | 6                | 0              | 1.333979                | -1.018509 | -0.983844 |
| 6                | 6                | 0              | 1.567282                | -2.008550 | -1.933997 |
| 7                | 6                | 0              | 2.819560                | -2.602488 | -2.012497 |
| 8                | 6                | 0              | 3.872864                | -2.183540 | -1.183184 |
| 9                | 6                | 0              | 3.696815                | -1.084514 | -0.343769 |
| 10               | 6                | 0              | 2.776174                | 1.859539  | 0.742564  |
| 11               | 6                | 0              | 2.245863                | 3.148413  | 0.819205  |
| 12               | 6                | 0              | 0.984116                | 3.367752  | 0.250883  |
| 13               | 6                | 0              | 0.220959                | 2.347795  | -0.319524 |
| 14               | 6                | 0              | 3.023521                | 4.296714  | 1.446779  |
| 15               | 6                | 0              | 3.284789                | 4.060656  | 2.945332  |
| 16               | 6                | 0              | 4.335517                | 4.588632  | 0.696048  |
| 17               | 8                | 0              | 5.044795                | -2.868496 | -1.331252 |
| 18               | 6                | 0              | 6.164214                | -2.461149 | -0.559872 |
| 19               | 1                | 0              | 0.804431                | -2.287360 | -2.642917 |
| 20               | 1                | 0              | 3.021572                | -3.378602 | -2.740375 |
| 21               | 1                | 0              | 4.524878                | -0.650700 | 0.200212  |
| 22               | 1                | 0              | 3.780427                | 1.656293  | 1.099784  |
| 23               | 1                | 0              | 0.584931                | 4.377047  | 0.232650  |
| 24               | 1                | 0              | -0.722730               | 2.590265  | -0.777252 |
| 25               | 1                | 0              | 2.393393                | 5.189361  | 1.361194  |
| 26               | 1                | 0              | 3.787571                | 4.923973  | 3.391855  |
| 27               | 1                | 0              | 2.350489                | 3.892320  | 3.486661  |
| 28               | 1                | 0              | 3.922712                | 3.185705  | 3.102748  |
| 29               | 1                | 0              | 4.840523                | 5.459831  | 1.124328  |
| 30               | 1                | 0              | 4.148003                | 4.788561  | -0.361812 |
| 31               | 1                | 0              | 5.025603                | 3.741810  | 0.758061  |
| 32               | 1                | 0              | 6.965597                | -3.155627 | -0.807234 |
| 33               | 1                | 0              | 5.954119                | -2.518122 | 0.514306  |
| 34               | 1                | 0              | 6.479811                | -1.442439 | -0.813445 |
| 35               | 5                | 0              | -1.237101               | -0.571551 | -0.544368 |
| 36               | 6                | 0              | -2.238976               | 0.663050  | -0.671146 |
| 37               | 6                | 0              | -2.607996               | 1.511084  | 0.392140  |
| 38               | 6                | 0              | -2.766903               | 0.929054  | -1.956210 |
| 39               | 6                | 0              | -3.488814               | 2.572902  | 0.163557  |
| 40               | 6                | 0              | -3.643406               | 1.997106  | -2.148479 |
| 41               | 6                | 0              | -4.022710               | 2.833766  | -1.096085 |
| 42               | 1                | 0              | -3.761292               | 3.215956  | 0.996656  |
| 43               | 1                | 0              | -4.040015               | 2.181306  | -3.143331 |
| 44               | 6                | 0              | -1.770126               | -1.958127 | 0.071328  |
| 45               | 6                | 0              | -1.090116               | -3.220739 | 0.148332  |
| 46               | 6                | 0              | -2.887200               | -1.864718 | 0.975555  |
| 47               | 6                | 0              | -1.184066               | -4.019209 | 1.284293  |
| 48               | 6                | 0              | -2.954130               | -2.691303 | 2.104022  |
| 49               | 6                | 0              | -2.045472               | -3.715345 | 2.338072  |
| 50               | 1                | 0              | -0.618375               | -4.946745 | 1.311931  |
| 51               | 1                | 0              | -3.780888               | -2.548961 | 2.794405  |



|    |   |   |           |           |           |
|----|---|---|-----------|-----------|-----------|
| 52 | 6 | 0 | -2.394244 | 0.060172  | -3.139531 |
| 53 | 1 | 0 | -1.320606 | 0.107449  | -3.346551 |
| 54 | 1 | 0 | -2.643020 | -0.991193 | -2.959284 |
| 55 | 1 | 0 | -2.922324 | 0.375395  | -4.041714 |
| 56 | 6 | 0 | -2.052474 | 1.348677  | 1.792269  |
| 57 | 1 | 0 | -1.575373 | 0.380526  | 1.944992  |
| 58 | 1 | 0 | -1.303431 | 2.118366  | 2.000438  |
| 59 | 1 | 0 | -2.842572 | 1.454143  | 2.541684  |
| 60 | 6 | 0 | -4.997814 | 3.965241  | -1.317511 |
| 61 | 1 | 0 | -4.930865 | 4.710650  | -0.521939 |
| 62 | 1 | 0 | -4.814823 | 4.469055  | -2.270359 |
| 63 | 1 | 0 | -6.029798 | 3.597778  | -1.338094 |
| 64 | 6 | 0 | -4.148599 | -1.047275 | 0.741965  |
| 65 | 1 | 0 | -4.252213 | -0.197277 | 1.417640  |
| 66 | 1 | 0 | -4.239863 | -0.680689 | -0.274821 |
| 67 | 1 | 0 | -4.996361 | -1.712652 | 0.933401  |
| 68 | 6 | 0 | -0.479147 | -3.907856 | -1.055042 |
| 69 | 1 | 0 | -0.667692 | -3.361557 | -1.974448 |
| 70 | 1 | 0 | 0.588842  | -4.099824 | -0.959332 |
| 71 | 1 | 0 | -0.978280 | -4.876554 | -1.161858 |
| 72 | 6 | 0 | -2.065393 | -4.526695 | 3.606208  |
| 73 | 1 | 0 | -3.044421 | -4.492143 | 4.089660  |
| 74 | 1 | 0 | -1.811315 | -5.572885 | 3.417667  |
| 75 | 1 | 0 | -1.331993 | -4.138765 | 4.322170  |

-----

Compound 3 1-RF-C1-TSaa

Method: b3lyp/6-311g(d,p)

SCF Done: E(RB3LYP) = -1473.71191265 A.U. after 1 cycles

Lowest frequency = -41.6101

Zero-point correction= 0.631470  
(Hartree/Particle)  
Thermal correction to Energy= 0.667561  
Thermal correction to Enthalpy= 0.668505  
Thermal correction to Gibbs Free Energy= 0.562725  
Sum of electronic and zero-point Energies= -1473.080443  
Sum of electronic and thermal Energies= -1473.044352  
Sum of electronic and thermal Enthalpies= -1473.043408  
Sum of electronic and thermal Free Energies= -1473.149188

Standard orientation:

| Center<br>Number | Atomic<br>Number | Atomic<br>Type | Coordinates (Angstroms) |           |           |
|------------------|------------------|----------------|-------------------------|-----------|-----------|
|                  |                  |                | X                       | Y         | Z         |
| 1                | 6                | 0              | 2.262679                | 0.811228  | 0.101500  |
| 2                | 6                | 0              | 1.320187                | 1.820504  | 0.538377  |
| 3                | 6                | 0              | 0.080728                | 1.509628  | -0.054182 |
| 4                | 7                | 0              | 0.137718                | 0.181230  | -0.643229 |
| 5                | 6                | 0              | 1.540155                | -0.083347 | -0.713367 |
| 6                | 6                | 0              | 2.238383                | -0.846171 | -1.641413 |
| 7                | 6                | 0              | 3.630317                | -0.871156 | -1.597174 |
| 8                | 6                | 0              | 4.360913                | -0.108752 | -0.670334 |
| 9                | 6                | 0              | 3.655820                | 0.763958  | 0.158027  |
| 10               | 6                | 0              | 1.535933                | 3.022448  | 1.220012  |
| 11               | 6                | 0              | 0.506221                | 3.958035  | 1.257352  |
| 12               | 6                | 0              | -0.688450               | 3.700235  | 0.567551  |
| 13               | 6                | 0              | -0.904987               | 2.498458  | -0.094220 |

|    |   |   |           |           |           |
|----|---|---|-----------|-----------|-----------|
| 14 | 6 | 0 | 6.385780  | -1.560005 | -0.203459 |
| 15 | 1 | 0 | 1.719564  | -1.374354 | -2.425007 |
| 16 | 1 | 0 | 4.157996  | -1.476367 | -2.326424 |
| 17 | 1 | 0 | 4.197804  | 1.450983  | 0.800433  |
| 18 | 1 | 0 | 2.501784  | 3.222353  | 1.663993  |
| 19 | 1 | 0 | -1.440075 | 4.479747  | 0.542084  |
| 20 | 1 | 0 | -1.819519 | 2.366033  | -0.646289 |
| 21 | 1 | 0 | 7.475776  | -1.564010 | -0.107103 |
| 22 | 1 | 0 | 6.114152  | -2.316961 | -0.945298 |
| 23 | 1 | 0 | 5.957490  | -1.863596 | 0.755058  |
| 24 | 5 | 0 | -1.014438 | -0.746989 | -0.534342 |
| 25 | 6 | 0 | -2.415573 | -0.009943 | -0.725787 |
| 26 | 6 | 0 | -3.178640 | 0.545168  | 0.320608  |
| 27 | 6 | 0 | -2.899927 | 0.113388  | -2.049074 |
| 28 | 6 | 0 | -4.390863 | 1.182367  | 0.037137  |
| 29 | 6 | 0 | -4.113197 | 0.755798  | -2.295807 |
| 30 | 6 | 0 | -4.880808 | 1.296948  | -1.261426 |
| 31 | 1 | 0 | -4.964575 | 1.605358  | 0.857904  |
| 32 | 1 | 0 | -4.468414 | 0.836854  | -3.319630 |
| 33 | 6 | 0 | -0.994229 | -2.269661 | -0.015387 |
| 34 | 6 | 0 | 0.127082  | -3.158880 | 0.108062  |
| 35 | 6 | 0 | -2.131879 | -2.689196 | 0.761891  |
| 36 | 6 | 0 | 0.259339  | -3.999639 | 1.208931  |
| 37 | 6 | 0 | -1.962904 | -3.544433 | 1.858042  |
| 38 | 6 | 0 | -0.744029 | -4.133007 | 2.168511  |
| 39 | 1 | 0 | 1.145672  | -4.624756 | 1.278002  |
| 40 | 1 | 0 | -2.836473 | -3.788432 | 2.456152  |
| 41 | 6 | 0 | -2.114723 | -0.451329 | -3.214632 |
| 42 | 1 | 0 | -1.135466 | 0.028782  | -3.305907 |
| 43 | 1 | 0 | -1.938406 | -1.525896 | -3.096187 |
| 44 | 1 | 0 | -2.647369 | -0.305067 | -4.156467 |
| 45 | 6 | 0 | -2.719017 | 0.521245  | 1.764037  |
| 46 | 1 | 0 | -1.893692 | -0.170933 | 1.930818  |
| 47 | 1 | 0 | -2.381833 | 1.514076  | 2.076247  |
| 48 | 1 | 0 | -3.537041 | 0.232571  | 2.430866  |
| 49 | 6 | 0 | -6.206502 | 1.961633  | -1.545634 |
| 50 | 1 | 0 | -6.513156 | 2.608150  | -0.720457 |
| 51 | 1 | 0 | -6.161710 | 2.569139  | -2.453493 |
| 52 | 1 | 0 | -6.997107 | 1.217421  | -1.692298 |
| 53 | 6 | 0 | -3.588896 | -2.431984 | 0.408499  |
| 54 | 1 | 0 | -4.090792 | -1.743751 | 1.089829  |
| 55 | 1 | 0 | -3.726997 | -2.063456 | -0.602237 |
| 56 | 1 | 0 | -4.106833 | -3.393187 | 0.486199  |
| 57 | 6 | 0 | 1.071688  | -3.467149 | -1.035212 |
| 58 | 1 | 0 | 0.761351  | -2.988242 | -1.959098 |
| 59 | 1 | 0 | 2.111429  | -3.216828 | -0.828475 |
| 60 | 1 | 0 | 1.022295  | -4.546445 | -1.212759 |
| 61 | 6 | 0 | -0.550685 | -4.964062 | 3.408948  |
| 62 | 1 | 0 | -1.500276 | -5.352669 | 3.783946  |
| 63 | 1 | 0 | 0.118824  | -5.808497 | 3.226343  |
| 64 | 1 | 0 | -0.103532 | -4.362652 | 4.208516  |
| 65 | 6 | 0 | 5.881044  | -0.166613 | -0.620481 |
| 66 | 1 | 0 | 6.198524  | 0.541294  | 0.153835  |
| 67 | 6 | 0 | 6.525914  | 0.282318  | -1.944301 |
| 68 | 1 | 0 | 6.269781  | -0.396425 | -2.763069 |
| 69 | 1 | 0 | 6.192358  | 1.284299  | -2.225339 |
| 70 | 1 | 0 | 7.616434  | 0.297425  | -1.856009 |
| 71 | 8 | 0 | 0.574729  | 5.169303  | 1.887345  |
| 72 | 6 | 0 | 1.769546  | 5.499547  | 2.576398  |
| 73 | 1 | 0 | 2.627226  | 5.552689  | 1.895402  |

|    |   |   |          |          |          |
|----|---|---|----------|----------|----------|
| 74 | 1 | 0 | 1.600159 | 6.481832 | 3.014974 |
| 75 | 1 | 0 | 1.986457 | 4.779960 | 3.374540 |

-----

Compound 3 1-RF-N-TSaa

Method: b3lyp/6-311g(d,p)

SCF Done: E(RB3LYP) = -1473.68379062 A.U. after 1 cycles

Lowest frequency = -68.0060

|                                              |              |
|----------------------------------------------|--------------|
| Zero-point correction=                       | 0.632083     |
| (Hartree/Particle)                           |              |
| Thermal correction to Energy=                | 0.667429     |
| Thermal correction to Enthalpy=              | 0.668373     |
| Thermal correction to Gibbs Free Energy=     | 0.565528     |
| Sum of electronic and zero-point Energies=   | -1473.051708 |
| Sum of electronic and thermal Energies=      | -1473.016362 |
| Sum of electronic and thermal Enthalpies=    | -1473.015417 |
| Sum of electronic and thermal Free Energies= | -1473.118263 |

Standard orientation:

| Center<br>Number | Atomic<br>Number | Atomic<br>Type | Coordinates (Angstroms) |           |           |
|------------------|------------------|----------------|-------------------------|-----------|-----------|
|                  |                  |                | X                       | Y         | Z         |
| 1                | 5                | 0              | 1.089476                | 1.160902  | -0.008937 |
| 2                | 6                | 0              | 6.000502                | -1.513814 | 1.558765  |
| 3                | 1                | 0              | 5.923349                | -2.259005 | 2.354116  |
| 4                | 1                | 0              | 6.167719                | -2.055994 | 0.621169  |
| 5                | 1                | 0              | 6.885599                | -0.900682 | 1.743818  |
| 6                | 6                | 0              | 4.754423                | -0.675291 | 1.464906  |
| 7                | 6                | 0              | 3.504265                | -1.173383 | 1.824918  |
| 8                | 1                | 0              | 3.438116                | -2.145634 | 2.304317  |
| 9                | 6                | 0              | 2.345521                | 0.818724  | 0.936729  |
| 10               | 6                | 0              | 4.797749                | 0.673886  | 1.123138  |
| 11               | 1                | 0              | 5.759850                | 1.176561  | 1.070076  |
| 12               | 6                | 0              | -0.302577               | 4.696710  | -0.912557 |
| 13               | 1                | 0              | -0.079662               | 5.748339  | -0.752745 |
| 14               | 6                | 0              | -1.568839               | 4.331637  | -1.363318 |
| 15               | 6                | 0              | -1.691712               | 3.032769  | -1.851198 |
| 16               | 1                | 0              | -2.580454               | 2.757926  | -2.411624 |
| 17               | 6                | 0              | 0.481785                | 2.361499  | -0.889970 |
| 18               | 6                | 0              | -2.703395               | 5.317770  | -1.434759 |
| 19               | 1                | 0              | -3.360644               | 5.112181  | -2.283006 |
| 20               | 1                | 0              | -3.316174               | 5.261819  | -0.527857 |
| 21               | 1                | 0              | -2.339859               | 6.344543  | -1.519774 |
| 22               | 6                | 0              | 0.733351                | 3.772753  | -0.777181 |
| 23               | 6                | 0              | 2.328436                | -0.451544 | 1.627297  |
| 24               | 6                | 0              | 1.111305                | -1.025062 | 2.328580  |
| 25               | 1                | 0              | 0.328582                | -0.288370 | 2.485612  |
| 26               | 1                | 0              | 0.677987                | -1.884799 | 1.813025  |
| 27               | 1                | 0              | 1.434670                | -1.372643 | 3.314449  |
| 28               | 6                | 0              | 2.117354                | 4.378954  | -0.810550 |
| 29               | 1                | 0              | 2.149883                | 5.035982  | -1.685620 |
| 30               | 1                | 0              | 2.362326                | 4.998094  | 0.054927  |
| 31               | 1                | 0              | 2.884466                | 3.628778  | -0.955532 |
| 32               | 6                | 0              | -0.693553               | 2.074423  | -1.681474 |
| 33               | 6                | 0              | -0.875408               | 0.820011  | -2.515572 |
| 34               | 1                | 0              | 0.050774                | 0.271531  | -2.661052 |
| 35               | 1                | 0              | -1.623002               | 0.134052  | -2.111490 |

|    |   |   |           |           |           |
|----|---|---|-----------|-----------|-----------|
| 36 | 1 | 0 | -1.228151 | 1.132341  | -3.503236 |
| 37 | 6 | 0 | 3.642082  | 1.439038  | 0.964910  |
| 38 | 6 | 0 | 3.854296  | 2.926628  | 1.125692  |
| 39 | 1 | 0 | 4.437047  | 3.390331  | 0.327079  |
| 40 | 1 | 0 | 2.919176  | 3.456967  | 1.254447  |
| 41 | 1 | 0 | 4.424475  | 3.063782  | 2.050052  |
| 42 | 7 | 0 | 0.175370  | -0.051102 | -0.098015 |
| 43 | 6 | 0 | -1.136629 | -0.145753 | 0.369705  |
| 44 | 6 | 0 | 0.491342  | -1.294005 | -0.663623 |
| 45 | 6 | 0 | -1.655157 | -1.438832 | 0.113747  |
| 46 | 6 | 0 | -1.905431 | 0.796483  | 1.061245  |
| 47 | 6 | 0 | -0.612163 | -2.170203 | -0.566550 |
| 48 | 6 | 0 | -2.949200 | -1.770646 | 0.533166  |
| 49 | 6 | 0 | -3.184592 | 0.438355  | 1.463319  |
| 50 | 1 | 0 | -1.521169 | 1.786081  | 1.275964  |
| 51 | 6 | 0 | -0.547292 | -3.468011 | -1.098575 |
| 52 | 1 | 0 | -3.345691 | -2.762415 | 0.336460  |
| 53 | 1 | 0 | -3.780188 | 1.172337  | 1.995719  |
| 54 | 6 | 0 | 0.624170  | -3.869371 | -1.729117 |
| 55 | 1 | 0 | -1.400887 | -4.127661 | -1.017166 |
| 56 | 6 | 0 | 1.716304  | -2.983858 | -1.835863 |
| 57 | 1 | 0 | 2.605028  | -3.338393 | -2.343553 |
| 58 | 6 | 0 | 1.661188  | -1.702339 | -1.315502 |
| 59 | 1 | 0 | 2.513523  | -1.041151 | -1.410421 |
| 60 | 6 | 0 | -3.730397 | -0.838599 | 1.208467  |
| 61 | 6 | 0 | -5.137782 | -1.194496 | 1.668219  |
| 62 | 1 | 0 | -5.319041 | -2.229670 | 1.356047  |
| 63 | 6 | 0 | -5.276578 | -1.147986 | 3.200865  |
| 64 | 1 | 0 | -6.275834 | -1.470133 | 3.510073  |
| 65 | 1 | 0 | -4.543379 | -1.800251 | 3.681841  |
| 66 | 1 | 0 | -5.121686 | -0.134566 | 3.583068  |
| 67 | 6 | 0 | -6.207442 | -0.318534 | 0.990782  |
| 68 | 1 | 0 | -6.094082 | 0.733235  | 1.270242  |
| 69 | 1 | 0 | -6.136391 | -0.382907 | -0.097935 |
| 70 | 1 | 0 | -7.212648 | -0.634284 | 1.287059  |
| 71 | 6 | 0 | -0.231941 | -6.044425 | -2.230801 |
| 72 | 1 | 0 | 0.135513  | -6.941557 | -2.727346 |
| 73 | 1 | 0 | -0.497596 | -6.288920 | -1.195149 |
| 74 | 1 | 0 | -1.125228 | -5.683031 | -2.754528 |
| 75 | 8 | 0 | 0.825603  | -5.103816 | -2.290972 |

-----

Compound 3 2-RF-CC-TSaa

Method: b3lyp/6-311g(d,p)

SCF Done: E(RB3LYP) = -1473.76715093 A.U. after 1 cycles

Lowest frequency = -59.1160

|                                              |              |
|----------------------------------------------|--------------|
| Zero-point correction=                       | 0.632093     |
| (Hartree/Particle)                           |              |
| Thermal correction to Energy=                | 0.668482     |
| Thermal correction to Enthalpy=              | 0.669426     |
| Thermal correction to Gibbs Free Energy=     | 0.562255     |
| Sum of electronic and zero-point Energies=   | -1473.135058 |
| Sum of electronic and thermal Energies=      | -1473.098669 |
| Sum of electronic and thermal Enthalpies=    | -1473.097725 |
| Sum of electronic and thermal Free Energies= | -1473.204896 |

Standard orientation:

-----

| Center<br>Number | Atomic<br>Number | Atomic<br>Type | Coordinates (Angstroms) |           |           |
|------------------|------------------|----------------|-------------------------|-----------|-----------|
|                  |                  |                | X                       | Y         | Z         |
| 1                | 6                | 0              | -1.979253               | 1.863751  | -0.000041 |
| 2                | 6                | 0              | -2.551849               | 0.535398  | -0.000003 |
| 3                | 6                | 0              | -1.484719               | -0.382243 | 0.000014  |
| 4                | 7                | 0              | -0.234168               | 0.322051  | -0.000011 |
| 5                | 6                | 0              | -0.582738               | 1.717384  | -0.000046 |
| 6                | 6                | 0              | 0.227036                | 2.857313  | -0.000082 |
| 7                | 6                | 0              | -0.375170               | 4.106390  | -0.000112 |
| 8                | 6                | 0              | -1.773054               | 4.252075  | -0.000106 |
| 9                | 6                | 0              | -2.587456               | 3.123968  | -0.000071 |
| 10               | 6                | 0              | -3.877287               | 0.096453  | 0.000016  |
| 11               | 6                | 0              | -4.163624               | -1.265847 | 0.000052  |
| 12               | 6                | 0              | -3.085005               | -2.167431 | 0.000068  |
| 13               | 6                | 0              | -1.757093               | -1.751292 | 0.000050  |
| 14               | 6                | 0              | -5.604145               | -1.757385 | 0.000073  |
| 15               | 6                | 0              | -5.938478               | -2.561702 | -1.269288 |
| 16               | 6                | 0              | -5.938463               | -2.561637 | 1.269479  |
| 17               | 8                | 0              | -2.226809               | 5.540316  | -0.000137 |
| 18               | 6                | 0              | -3.628643               | 5.759224  | -0.000133 |
| 19               | 1                | 0              | 1.302441                | 2.789171  | -0.000088 |
| 20               | 1                | 0              | 0.228688                | 5.005449  | -0.000140 |
| 21               | 1                | 0              | -3.666154               | 3.201719  | -0.000066 |
| 22               | 1                | 0              | -4.687672               | 0.818756  | 0.000002  |
| 23               | 1                | 0              | -3.281994               | -3.233983 | 0.000096  |
| 24               | 1                | 0              | -0.968737               | -2.485825 | 0.000064  |
| 25               | 1                | 0              | -6.242470               | -0.866200 | 0.000054  |
| 26               | 1                | 0              | -6.994541               | -2.847943 | -1.277985 |
| 27               | 1                | 0              | -5.735762               | -1.977983 | -2.170676 |
| 28               | 1                | 0              | -5.345161               | -3.479058 | -1.325721 |
| 29               | 1                | 0              | -6.994526               | -2.847877 | 1.278204  |
| 30               | 1                | 0              | -5.735736               | -1.977871 | 2.170835  |
| 31               | 1                | 0              | -5.345145               | -3.478989 | 1.325953  |
| 32               | 1                | 0              | -3.762017               | 6.839911  | -0.000160 |
| 33               | 1                | 0              | -4.102409               | 5.337217  | 0.893835  |
| 34               | 1                | 0              | -4.102423               | 5.337171  | -0.894071 |
| 35               | 5                | 0              | 1.085456                | -0.244421 | 0.000000  |
| 36               | 6                | 0              | 1.323187                | -1.838565 | 0.000040  |
| 37               | 6                | 0              | 1.466276                | -2.568965 | 1.206595  |
| 38               | 6                | 0              | 1.466269                | -2.569028 | -1.206477 |
| 39               | 6                | 0              | 1.878226                | -3.904010 | 1.185851  |
| 40               | 6                | 0              | 1.878219                | -3.904072 | -1.185665 |
| 41               | 6                | 0              | 2.132455                | -4.586233 | 0.000110  |
| 42               | 1                | 0              | 1.976585                | -4.430692 | 2.131542  |
| 43               | 1                | 0              | 1.976572                | -4.430803 | -2.131329 |
| 44               | 6                | 0              | 2.405494                | 0.678621  | -0.000028 |
| 45               | 6                | 0              | 3.039127                | 1.069203  | 1.206385  |
| 46               | 6                | 0              | 3.039122                | 1.069138  | -1.206464 |
| 47               | 6                | 0              | 4.309647                | 1.650057  | 1.186063  |
| 48               | 6                | 0              | 4.309643                | 1.649994  | -1.186178 |
| 49               | 6                | 0              | 4.989729                | 1.909704  | -0.000066 |
| 50               | 1                | 0              | 4.765720                | 1.932964  | 2.131407  |
| 51               | 1                | 0              | 4.765712                | 1.932849  | -2.131539 |
| 52               | 6                | 0              | 1.095608                | -2.008121 | -2.563486 |
| 53               | 1                | 0              | 0.579692                | -2.773599 | -3.148833 |
| 54               | 1                | 0              | 0.424625                | -1.153131 | -2.491834 |
| 55               | 1                | 0              | 1.974208                | -1.704092 | -3.136972 |
| 56               | 6                | 0              | 1.095622                | -2.007987 | 2.563577  |
| 57               | 1                | 0              | 0.424645                | -1.152997 | 2.491885  |

|    |   |   |          |           |           |
|----|---|---|----------|-----------|-----------|
| 58 | 1 | 0 | 0.579704 | -2.773432 | 3.148965  |
| 59 | 1 | 0 | 1.974227 | -1.703935 | 3.137045  |
| 60 | 6 | 0 | 2.630618 | -6.010297 | 0.000146  |
| 61 | 1 | 0 | 3.725911 | -6.041131 | 0.000145  |
| 62 | 1 | 0 | 2.289810 | -6.553396 | 0.885061  |
| 63 | 1 | 0 | 2.289807 | -6.553442 | -0.884740 |
| 64 | 6 | 0 | 2.355726 | 1.009455  | -2.557420 |
| 65 | 1 | 0 | 2.812591 | 0.270432  | -3.220396 |
| 66 | 1 | 0 | 1.292959 | 0.788882  | -2.481334 |
| 67 | 1 | 0 | 2.445712 | 1.980836  | -3.052053 |
| 68 | 6 | 0 | 2.355736 | 1.009591  | 2.557347  |
| 69 | 1 | 0 | 1.292967 | 0.789024  | 2.481276  |
| 70 | 1 | 0 | 2.812597 | 0.270596  | 3.220357  |
| 71 | 1 | 0 | 2.445733 | 1.980995  | 3.051933  |
| 72 | 6 | 0 | 6.386121 | 2.480826  | -0.000084 |
| 73 | 1 | 0 | 6.566840 | 3.096083  | 0.884770  |
| 74 | 1 | 0 | 7.135210 | 1.681135  | -0.000061 |
| 75 | 1 | 0 | 6.566838 | 3.096032  | -0.884973 |

-----

Compound 3 2-RF-CC-TSab

Method: b3lyp/6-311g(d,p)

SCF Done: E(RB3LYP) = -1473.76697064 A.U. after 1 cycles

Lowest frequency = -59.2052

Zero-point correction= 0.632098  
(Hartree/Particle)  
Thermal correction to Energy= 0.668473  
Thermal correction to Enthalpy= 0.669418  
Thermal correction to Gibbs Free Energy= 0.562228  
Sum of electronic and zero-point Energies= -1473.134873  
Sum of electronic and thermal Energies= -1473.098497  
Sum of electronic and thermal Enthalpies= -1473.097553  
Sum of electronic and thermal Free Energies= -1473.204743

Standard orientation:

| Center<br>Number | Atomic<br>Number | Atomic<br>Type | Coordinates (Angstroms) |           |           |
|------------------|------------------|----------------|-------------------------|-----------|-----------|
|                  |                  |                | X                       | Y         | Z         |
| 1                | 6                | 0              | -2.208736               | 1.445945  | -0.000039 |
| 2                | 6                | 0              | -2.566565               | 0.043803  | -0.000002 |
| 3                | 6                | 0              | -1.366532               | -0.695176 | 0.000022  |
| 4                | 7                | 0              | -0.242666               | 0.197538  | -0.000001 |
| 5                | 6                | 0              | -0.806706               | 1.520933  | -0.000037 |
| 6                | 6                | 0              | -0.186408               | 2.774228  | -0.000068 |
| 7                | 6                | 0              | -0.977839               | 3.912906  | -0.000102 |
| 8                | 6                | 0              | -2.381105               | 3.836959  | -0.000105 |
| 9                | 6                | 0              | -3.007625               | 2.594572  | -0.000073 |
| 10               | 6                | 0              | -3.806005               | -0.594481 | 0.000013  |
| 11               | 6                | 0              | -3.873836               | -1.987772 | 0.000053  |
| 12               | 6                | 0              | -2.668740               | -2.706057 | 0.000076  |
| 13               | 6                | 0              | -1.419698               | -2.087791 | 0.000061  |
| 14               | 6                | 0              | -5.208377               | -2.720597 | 0.000070  |
| 15               | 6                | 0              | -6.027953               | -2.425669 | 1.269368  |
| 16               | 6                | 0              | -6.027945               | -2.425744 | -1.269250 |
| 17               | 8                | 0              | -3.032115               | 5.037607  | -0.000139 |
| 18               | 6                | 0              | -4.450914               | 5.032839  | -0.000145 |
| 19               | 1                | 0              | 0.886153                | 2.876809  | -0.000067 |

|    |   |   |           |           |           |
|----|---|---|-----------|-----------|-----------|
| 20 | 1 | 0 | -0.522798 | 4.895698  | -0.000126 |
| 21 | 1 | 0 | -4.085135 | 2.501638  | -0.000074 |
| 22 | 1 | 0 | -4.713785 | -0.000250 | -0.000006 |
| 23 | 1 | 0 | -2.705419 | -3.790743 | 0.000107  |
| 24 | 1 | 0 | -0.526179 | -2.690170 | 0.000080  |
| 25 | 1 | 0 | -4.980688 | -3.792586 | 0.000102  |
| 26 | 1 | 0 | -6.950979 | -3.013204 | 1.278697  |
| 27 | 1 | 0 | -5.459918 | -2.668445 | 2.170821  |
| 28 | 1 | 0 | -6.306217 | -1.368982 | 1.325356  |
| 29 | 1 | 0 | -6.950971 | -3.013279 | -1.278551 |
| 30 | 1 | 0 | -5.459904 | -2.668573 | -2.170686 |
| 31 | 1 | 0 | -6.306208 | -1.369060 | -1.325303 |
| 32 | 1 | 0 | -4.752992 | 6.078979  | -0.000175 |
| 33 | 1 | 0 | -4.852169 | 4.541415  | 0.893851  |
| 34 | 1 | 0 | -4.852162 | 4.541366  | -0.894118 |
| 35 | 5 | 0 | 1.148425  | -0.158297 | 0.000007  |
| 36 | 6 | 0 | 1.635546  | -1.693556 | 0.000046  |
| 37 | 6 | 0 | 1.903795  | -2.387928 | 1.206439  |
| 38 | 6 | 0 | 1.903794  | -2.387989 | -1.206312 |
| 39 | 6 | 0 | 2.566518  | -3.617731 | 1.186254  |
| 40 | 6 | 0 | 2.566516  | -3.617791 | -1.186066 |
| 41 | 6 | 0 | 2.952779  | -4.234828 | 0.000110  |
| 42 | 1 | 0 | 2.759474  | -4.118528 | 2.131635  |
| 43 | 1 | 0 | 2.759471  | -4.118636 | -2.131421 |
| 44 | 6 | 0 | 2.306506  | 0.962794  | -0.000022 |
| 45 | 6 | 0 | 2.862898  | 1.457003  | 1.206577  |
| 46 | 6 | 0 | 2.862894  | 1.456943  | -1.206648 |
| 47 | 6 | 0 | 3.998076  | 2.271505  | 1.185737  |
| 48 | 6 | 0 | 3.998072  | 2.271446  | -1.185852 |
| 49 | 6 | 0 | 4.612607  | 2.661697  | -0.000068 |
| 50 | 1 | 0 | 4.395018  | 2.631383  | 2.131377  |
| 51 | 1 | 0 | 4.395011  | 2.631276  | -2.131511 |
| 52 | 6 | 0 | 1.390596  | -1.929864 | -2.556288 |
| 53 | 1 | 0 | 0.860541  | -2.755028 | -3.040763 |
| 54 | 1 | 0 | 0.688328  | -1.102389 | -2.480186 |
| 55 | 1 | 0 | 2.199657  | -1.632533 | -3.228230 |
| 56 | 6 | 0 | 1.390599  | -1.929735 | 2.556393  |
| 57 | 1 | 0 | 0.688328  | -1.102266 | 2.480248  |
| 58 | 1 | 0 | 0.860546  | -2.754876 | 3.040911  |
| 59 | 1 | 0 | 2.199660  | -1.632367 | 3.228318  |
| 60 | 6 | 0 | 3.723020  | -5.532082 | 0.000142  |
| 61 | 1 | 0 | 4.802714  | -5.345293 | 0.000134  |
| 62 | 1 | 0 | 3.496594  | -6.131969 | 0.885056  |
| 63 | 1 | 0 | 3.496589  | -6.132017 | -0.884739 |
| 64 | 6 | 0 | 2.230500  | 1.230752  | -2.563903 |
| 65 | 1 | 0 | 2.737574  | 0.444581  | -3.127802 |
| 66 | 1 | 0 | 1.175014  | 0.970610  | -2.493207 |
| 67 | 1 | 0 | 2.297163  | 2.145823  | -3.157842 |
| 68 | 6 | 0 | 2.230508  | 1.230880  | 2.563845  |
| 69 | 1 | 0 | 1.175023  | 0.970727  | 2.493165  |
| 70 | 1 | 0 | 2.737588  | 0.444742  | 3.127785  |
| 71 | 1 | 0 | 2.297167  | 2.145983  | 3.157736  |
| 72 | 6 | 0 | 5.869546  | 3.496085  | -0.000091 |
| 73 | 1 | 0 | 5.925673  | 4.134858  | 0.884759  |
| 74 | 1 | 0 | 6.761306  | 2.859376  | -0.000079 |
| 75 | 1 | 0 | 5.925668  | 4.134818  | -0.884971 |

-----

Compound 3 2-RF-CN-TSaa

Method: b3lyp/6-311g(d,p)  
 SCF Done: E(RB3LYP) = -1473.74746040 A.U. after 1 cycles  
 Lowest frequency = -37.8543

Zero-point correction= 0.632031  
 (Hartree/Particle)  
 Thermal correction to Energy= 0.668087  
 Thermal correction to Enthalpy= 0.669031  
 Thermal correction to Gibbs Free Energy= 0.563098  
 Sum of electronic and zero-point Energies= -1473.115429  
 Sum of electronic and thermal Energies= -1473.079374  
 Sum of electronic and thermal Enthalpies= -1473.078429  
 Sum of electronic and thermal Free Energies= -1473.184362

Standard orientation:

| Center<br>Number | Atomic<br>Number | Atomic<br>Type | Coordinates (Angstroms) |           |           |
|------------------|------------------|----------------|-------------------------|-----------|-----------|
|                  |                  |                | X                       | Y         | Z         |
| 1                | 6                | 0              | -2.165379               | 1.098854  | -0.783880 |
| 2                | 6                | 0              | -2.414790               | -0.197975 | -0.208998 |
| 3                | 6                | 0              | -1.147715               | -0.807651 | -0.027283 |
| 4                | 7                | 0              | -0.128197               | 0.065443  | -0.418403 |
| 5                | 6                | 0              | -0.762769               | 1.212071  | -0.922951 |
| 6                | 6                | 0              | -0.220373               | 2.306968  | -1.606298 |
| 7                | 6                | 0              | -1.070901               | 3.301034  | -2.061939 |
| 8                | 6                | 0              | -2.463815               | 3.220873  | -1.869185 |
| 9                | 6                | 0              | -3.020145               | 2.110860  | -1.244668 |
| 10               | 6                | 0              | -3.585187               | -0.901664 | 0.093706  |
| 11               | 6                | 0              | -3.521974               | -2.215092 | 0.548101  |
| 12               | 6                | 0              | -2.253892               | -2.820682 | 0.666411  |
| 13               | 6                | 0              | -1.075173               | -2.144445 | 0.379219  |
| 14               | 6                | 0              | -4.793429               | -2.983565 | 0.881258  |
| 15               | 6                | 0              | -4.991240               | -4.206026 | -0.033474 |
| 16               | 6                | 0              | -4.849904               | -3.389576 | 2.365256  |
| 17               | 8                | 0              | -3.178832               | 4.280827  | -2.362287 |
| 18               | 6                | 0              | -4.588047               | 4.261295  | -2.214694 |
| 19               | 1                | 0              | 0.839155                | 2.379775  | -1.806887 |
| 20               | 1                | 0              | -0.682657               | 4.160010  | -2.595520 |
| 21               | 1                | 0              | -4.090297               | 2.005904  | -1.126003 |
| 22               | 1                | 0              | -4.552135               | -0.426000 | -0.040900 |
| 23               | 1                | 0              | -2.187447               | -3.857596 | 0.978442  |
| 24               | 1                | 0              | -0.128557               | -2.662181 | 0.446036  |
| 25               | 1                | 0              | -5.631270               | -2.300734 | 0.698012  |
| 26               | 1                | 0              | -5.942633               | -4.701944 | 0.182600  |
| 27               | 1                | 0              | -4.990076               | -3.913609 | -1.086512 |
| 28               | 1                | 0              | -4.194349               | -4.942163 | 0.108683  |
| 29               | 1                | 0              | -5.799764               | -3.881186 | 2.597465  |
| 30               | 1                | 0              | -4.748738               | -2.517179 | 3.015637  |
| 31               | 1                | 0              | -4.044982               | -4.087026 | 2.616115  |
| 32               | 1                | 0              | -4.948784               | 5.189073  | -2.656718 |
| 33               | 1                | 0              | -4.883058               | 4.225742  | -1.159133 |
| 34               | 1                | 0              | -5.038509               | 3.412078  | -2.742630 |
| 35               | 5                | 0              | 1.332470                | -0.028854 | -0.001960 |
| 36               | 6                | 0              | 1.612222                | 0.569420  | 1.458069  |
| 37               | 6                | 0              | 1.911222                | 1.939112  | 1.649223  |
| 38               | 6                | 0              | 1.504178                | -0.238555 | 2.614871  |
| 39               | 6                | 0              | 1.993034                | 2.472427  | 2.937534  |
| 40               | 6                | 0              | 1.593080                | 0.331460  | 3.886795  |
| 41               | 6                | 0              | 1.807657                | 1.693810  | 4.076431  |



|    |   |   |           |           |           |
|----|---|---|-----------|-----------|-----------|
| 42 | 1 | 0 | 2.228952  | 3.527486  | 3.049306  |
| 43 | 1 | 0 | 1.510528  | -0.318009 | 4.754395  |
| 44 | 6 | 0 | 2.383530  | -0.665389 | -0.964581 |
| 45 | 6 | 0 | 2.023096  | -1.183886 | -2.259328 |
| 46 | 6 | 0 | 3.772132  | -0.764117 | -0.596671 |
| 47 | 6 | 0 | 2.995926  | -1.750006 | -3.083612 |
| 48 | 6 | 0 | 4.694935  | -1.341189 | -1.467081 |
| 49 | 6 | 0 | 4.333576  | -1.845025 | -2.713357 |
| 50 | 1 | 0 | 2.695505  | -2.129511 | -4.054904 |
| 51 | 1 | 0 | 5.734834  | -1.397334 | -1.161548 |
| 52 | 6 | 0 | 1.359653  | -1.745491 | 2.551676  |
| 53 | 1 | 0 | 0.321067  | -2.058389 | 2.681107  |
| 54 | 1 | 0 | 1.716771  | -2.155919 | 1.604444  |
| 55 | 1 | 0 | 1.944067  | -2.213548 | 3.348464  |
| 56 | 6 | 0 | 2.226066  | 2.877154  | 0.501892  |
| 57 | 1 | 0 | 2.560061  | 2.342013  | -0.389946 |
| 58 | 1 | 0 | 1.360747  | 3.483309  | 0.224154  |
| 59 | 1 | 0 | 3.027923  | 3.563918  | 0.786265  |
| 60 | 6 | 0 | 1.852448  | 2.298001  | 5.458447  |
| 61 | 1 | 0 | 2.501460  | 3.176564  | 5.489957  |
| 62 | 1 | 0 | 0.854387  | 2.617721  | 5.778094  |
| 63 | 1 | 0 | 2.216352  | 1.579761  | 6.197303  |
| 64 | 6 | 0 | 4.356250  | -0.271899 | 0.711392  |
| 65 | 1 | 0 | 4.205567  | 0.797383  | 0.859052  |
| 66 | 1 | 0 | 3.917791  | -0.768821 | 1.576782  |
| 67 | 1 | 0 | 5.430759  | -0.462973 | 0.725421  |
| 68 | 6 | 0 | 0.626516  | -1.175262 | -2.849548 |
| 69 | 1 | 0 | -0.082103 | -1.747997 | -2.250663 |
| 70 | 1 | 0 | 0.221930  | -0.168010 | -2.950182 |
| 71 | 1 | 0 | 0.653742  | -1.621606 | -3.845261 |
| 72 | 6 | 0 | 5.350068  | -2.492183 | -3.617212 |
| 73 | 1 | 0 | 5.438738  | -3.560971 | -3.392303 |
| 74 | 1 | 0 | 5.065775  | -2.401688 | -4.667712 |
| 75 | 1 | 0 | 6.339799  | -2.048750 | -3.487107 |

-----

Compound 3 2-RF-CN-TSab

Method: b3lyp/6-311g(d,p)

SCF Done: E(RB3LYP) = -1473.74719292 A.U. after 1 cycles

Lowest frequency = -37.2857

Zero-point correction= 0.632058  
(Hartree/Particle)  
Thermal correction to Energy= 0.668094  
Thermal correction to Enthalpy= 0.669039  
Thermal correction to Gibbs Free Energy= 0.563076  
Sum of electronic and zero-point Energies= -1473.115135  
Sum of electronic and thermal Energies= -1473.079099  
Sum of electronic and thermal Enthalpies= -1473.078154  
Sum of electronic and thermal Free Energies= -1473.184117

Standard orientation:

| Center<br>Number | Atomic<br>Number | Atomic<br>Type | Coordinates (Angstroms) |           |           |
|------------------|------------------|----------------|-------------------------|-----------|-----------|
|                  |                  |                | X                       | Y         | Z         |
| 1                | 6                | 0              | 2.166625                | -0.012200 | 1.197441  |
| 2                | 6                | 0              | 2.357558                | -0.349430 | -0.190582 |
| 3                | 6                | 0              | 1.062968                | -0.556076 | -0.735467 |

|    |   |   |           |           |           |
|----|---|---|-----------|-----------|-----------|
| 4  | 7 | 0 | 0.084929  | -0.317522 | 0.234915  |
| 5  | 6 | 0 | 0.771713  | -0.030900 | 1.426096  |
| 6  | 6 | 0 | 0.281903  | 0.101814  | 2.730801  |
| 7  | 6 | 0 | 1.177206  | 0.331180  | 3.762975  |
| 8  | 6 | 0 | 2.563355  | 0.412512  | 3.528126  |
| 9  | 6 | 0 | 3.066888  | 0.223631  | 2.246364  |
| 10 | 6 | 0 | 3.495383  | -0.555276 | -0.973906 |
| 11 | 6 | 0 | 3.373429  | -0.992901 | -2.291838 |
| 12 | 6 | 0 | 2.082961  | -1.245328 | -2.793011 |
| 13 | 6 | 0 | 0.932114  | -1.044429 | -2.038000 |
| 14 | 6 | 0 | 4.595874  | -1.222083 | -3.171427 |
| 15 | 6 | 0 | 5.373574  | 0.081679  | -3.427347 |
| 16 | 6 | 0 | 5.521736  | -2.315403 | -2.608125 |
| 17 | 8 | 0 | 3.326452  | 0.654281  | 4.640348  |
| 18 | 6 | 0 | 4.732106  | 0.735682  | 4.480338  |
| 19 | 1 | 0 | -0.771504 | 0.004246  | 2.951922  |
| 20 | 1 | 0 | 0.829955  | 0.436739  | 4.783549  |
| 21 | 1 | 0 | 4.130544  | 0.236344  | 2.049321  |
| 22 | 1 | 0 | 4.477180  | -0.386778 | -0.542875 |
| 23 | 1 | 0 | 1.981081  | -1.625786 | -3.804622 |
| 24 | 1 | 0 | -0.034317 | -1.291078 | -2.454646 |
| 25 | 1 | 0 | 4.226382  | -1.576503 | -4.140709 |
| 26 | 1 | 0 | 6.209173  | -0.092033 | -4.112553 |
| 27 | 1 | 0 | 4.726717  | 0.846567  | -3.864171 |
| 28 | 1 | 0 | 5.784291  | 0.485816  | -2.497176 |
| 29 | 1 | 0 | 6.355617  | -2.507346 | -3.290490 |
| 30 | 1 | 0 | 4.979420  | -3.252534 | -2.459565 |
| 31 | 1 | 0 | 5.944281  | -2.019009 | -1.643358 |
| 32 | 1 | 0 | 5.135128  | 0.943329  | 5.470658  |
| 33 | 1 | 0 | 5.014695  | 1.546623  | 3.798409  |
| 34 | 1 | 0 | 5.152710  | -0.207504 | 4.111154  |
| 35 | 5 | 0 | -1.383124 | -0.022830 | -0.035798 |
| 36 | 6 | 0 | -1.656566 | 1.503624  | -0.439703 |
| 37 | 6 | 0 | -1.902896 | 2.493052  | 0.541359  |
| 38 | 6 | 0 | -1.595719 | 1.928126  | -1.788245 |
| 39 | 6 | 0 | -1.980052 | 3.840875  | 0.183263  |
| 40 | 6 | 0 | -1.677937 | 3.285479  | -2.106952 |
| 41 | 6 | 0 | -1.840471 | 4.268010  | -1.134253 |
| 42 | 1 | 0 | -2.175160 | 4.574922  | 0.960709  |
| 43 | 1 | 0 | -1.632514 | 3.577506  | -3.152898 |
| 44 | 6 | 0 | -2.447275 | -1.158178 | 0.087661  |
| 45 | 6 | 0 | -2.092696 | -2.505514 | 0.453821  |
| 46 | 6 | 0 | -3.842891 | -0.906137 | -0.161286 |
| 47 | 6 | 0 | -3.077660 | -3.489104 | 0.547179  |
| 48 | 6 | 0 | -4.777786 | -1.933736 | -0.050541 |
| 49 | 6 | 0 | -4.422314 | -3.233642 | 0.297955  |
| 50 | 1 | 0 | -2.781279 | -4.494501 | 0.828287  |
| 51 | 1 | 0 | -5.822579 | -1.710357 | -0.241330 |
| 52 | 6 | 0 | -1.511421 | 0.958958  | -2.949870 |
| 53 | 1 | 0 | -0.487670 | 0.853906  | -3.316165 |
| 54 | 1 | 0 | -1.875508 | -0.036411 | -2.685322 |
| 55 | 1 | 0 | -2.122150 | 1.316350  | -3.783389 |
| 56 | 6 | 0 | -2.164570 | 2.157986  | 1.995563  |
| 57 | 1 | 0 | -2.509090 | 1.129754  | 2.127370  |
| 58 | 1 | 0 | -1.271596 | 2.293249  | 2.610155  |
| 59 | 1 | 0 | -2.941001 | 2.813498  | 2.399202  |
| 60 | 6 | 0 | -1.878912 | 5.732849  | -1.494515 |
| 61 | 1 | 0 | -2.499924 | 6.300090  | -0.796861 |
| 62 | 1 | 0 | -0.874225 | 6.169101  | -1.466151 |
| 63 | 1 | 0 | -2.272364 | 5.886611  | -2.502334 |

|    |   |   |           |           |           |
|----|---|---|-----------|-----------|-----------|
| 64 | 6 | 0 | -4.422063 | 0.438897  | -0.548543 |
| 65 | 1 | 0 | -4.231218 | 1.206582  | 0.201207  |
| 66 | 1 | 0 | -4.013237 | 0.813997  | -1.486764 |
| 67 | 1 | 0 | -5.503321 | 0.349418  | -0.667482 |
| 68 | 6 | 0 | -0.690014 | -2.988931 | 0.766283  |
| 69 | 1 | 0 | -0.012092 | -2.874271 | -0.079941 |
| 70 | 1 | 0 | -0.244304 | -2.460619 | 1.609257  |
| 71 | 1 | 0 | -0.723270 | -4.049710 | 1.021347  |
| 72 | 6 | 0 | -5.453102 | -4.329179 | 0.377332  |
| 73 | 1 | 0 | -5.583672 | -4.805224 | -0.600979 |
| 74 | 1 | 0 | -5.155078 | -5.107949 | 1.082523  |
| 75 | 1 | 0 | -6.426883 | -3.939915 | 0.682816  |

-----

Compound 3 3-RF-TSaa

Method: b3lyp/6-311g(d,p)

SCF Done: E(RB3LYP) = -1473.70417047 A.U. after 1 cycles

Lowest frequency = -57.7376

Zero-point correction= 0.632153  
(Hartree/Particle)  
Thermal correction to Energy= 0.668427  
Thermal correction to Enthalpy= 0.669371  
Thermal correction to Gibbs Free Energy= 0.561882  
Sum of electronic and zero-point Energies= -1473.072017  
Sum of electronic and thermal Energies= -1473.035743  
Sum of electronic and thermal Enthalpies= -1473.034799  
Sum of electronic and thermal Free Energies= -1473.142289

Standard orientation:

| Center<br>Number | Atomic<br>Number | Atomic<br>Type | Coordinates (Angstroms) |           |           |
|------------------|------------------|----------------|-------------------------|-----------|-----------|
|                  |                  |                | X                       | Y         | Z         |
| 1                | 6                | 0              | 2.144899                | 1.532629  | -0.050091 |
| 2                | 6                | 0              | 2.514523                | 0.173516  | -0.341469 |
| 3                | 6                | 0              | 1.326603                | -0.499301 | -0.705322 |
| 4                | 7                | 0              | 0.200478                | 0.354044  | -0.579453 |
| 5                | 6                | 0              | 0.755777                | 1.636504  | -0.275285 |
| 6                | 6                | 0              | 0.165411                | 2.900686  | -0.231688 |
| 7                | 6                | 0              | 0.934621                | 4.006444  | 0.096409  |
| 8                | 6                | 0              | 2.306501                | 3.889833  | 0.377738  |
| 9                | 6                | 0              | 2.923192                | 2.648221  | 0.285661  |
| 10               | 6                | 0              | 3.758966                | -0.455214 | -0.439587 |
| 11               | 6                | 0              | 3.857313                | -1.746402 | -0.946795 |
| 12               | 6                | 0              | 2.678004                | -2.366398 | -1.400517 |
| 13               | 6                | 0              | 1.431727                | -1.758489 | -1.304523 |
| 14               | 6                | 0              | 5.207183                | -2.440980 | -1.054217 |
| 15               | 6                | 0              | 5.265970                | -3.715830 | -0.193108 |
| 16               | 6                | 0              | 5.592714                | -2.741214 | -2.514127 |
| 17               | 8                | 0              | 2.940889                | 5.058249  | 0.700193  |
| 18               | 6                | 0              | 4.329928                | 5.008668  | 0.980724  |
| 19               | 1                | 0              | -0.864130               | 3.047442  | -0.493977 |
| 20               | 1                | 0              | 0.492007                | 4.994756  | 0.122667  |
| 21               | 1                | 0              | 3.985845                | 2.528878  | 0.448962  |
| 22               | 1                | 0              | 4.658114                | 0.078732  | -0.147601 |
| 23               | 1                | 0              | 2.734953                | -3.343540 | -1.868006 |
| 24               | 1                | 0              | 0.577798                | -2.246990 | -1.744977 |
| 25               | 1                | 0              | 5.953280                | -1.743254 | -0.656540 |

|    |   |   |           |           |           |
|----|---|---|-----------|-----------|-----------|
| 26 | 1 | 0 | 6.264148  | -4.162732 | -0.230622 |
| 27 | 1 | 0 | 5.028792  | -3.497137 | 0.851010  |
| 28 | 1 | 0 | 4.552317  | -4.465880 | -0.547020 |
| 29 | 1 | 0 | 6.594364  | -3.178589 | -2.566850 |
| 30 | 1 | 0 | 5.585423  | -1.830918 | -3.118737 |
| 31 | 1 | 0 | 4.897226  | -3.450982 | -2.971764 |
| 32 | 1 | 0 | 4.623351  | 6.029333  | 1.221799  |
| 33 | 1 | 0 | 4.905087  | 4.663982  | 0.113124  |
| 34 | 1 | 0 | 4.545298  | 4.359114  | 1.837349  |
| 35 | 5 | 0 | -1.189426 | -0.070566 | -0.122641 |
| 36 | 6 | 0 | -2.519174 | 0.209175  | -1.034534 |
| 37 | 6 | 0 | -2.906528 | -0.952915 | -1.763081 |
| 38 | 6 | 0 | -3.383799 | 1.334244  | -1.198149 |
| 39 | 6 | 0 | -4.088724 | -1.022221 | -2.498204 |
| 40 | 6 | 0 | -4.571210 | 1.212736  | -1.934599 |
| 41 | 6 | 0 | -4.965637 | 0.049127  | -2.579242 |
| 42 | 1 | 0 | -4.318678 | -1.947717 | -3.019345 |
| 43 | 1 | 0 | -5.209608 | 2.087853  | -2.010994 |
| 44 | 6 | 0 | -1.371528 | -0.827960 | 1.320048  |
| 45 | 6 | 0 | -1.876503 | 0.021384  | 2.351162  |
| 46 | 6 | 0 | -1.113886 | -2.174232 | 1.718587  |
| 47 | 6 | 0 | -2.134791 | -0.447086 | 3.638621  |
| 48 | 6 | 0 | -1.409566 | -2.600331 | 3.021783  |
| 49 | 6 | 0 | -1.930826 | -1.771060 | 4.001612  |
| 50 | 1 | 0 | -2.501828 | 0.258614  | 4.378338  |
| 51 | 1 | 0 | -1.201866 | -3.635637 | 3.274627  |
| 52 | 6 | 0 | -3.146136 | 2.762531  | -0.739709 |
| 53 | 1 | 0 | -2.592001 | 2.866003  | 0.181704  |
| 54 | 1 | 0 | -2.617743 | 3.318974  | -1.521835 |
| 55 | 1 | 0 | -4.103436 | 3.267082  | -0.592681 |
| 56 | 6 | 0 | -2.019245 | -2.166501 | -1.863667 |
| 57 | 1 | 0 | -1.301229 | -2.227861 | -1.056086 |
| 58 | 1 | 0 | -2.601343 | -3.091124 | -1.843036 |
| 59 | 1 | 0 | -1.457686 | -2.149091 | -2.804086 |
| 60 | 6 | 0 | -6.276550 | -0.046263 | -3.318133 |
| 61 | 1 | 0 | -6.199629 | -0.710871 | -4.182223 |
| 62 | 1 | 0 | -7.063847 | -0.444972 | -2.668849 |
| 63 | 1 | 0 | -6.608052 | 0.933061  | -3.670922 |
| 64 | 6 | 0 | -0.530794 | -3.285490 | 0.866203  |
| 65 | 1 | 0 | -1.304384 | -3.819561 | 0.306543  |
| 66 | 1 | 0 | 0.228101  | -2.944393 | 0.172660  |
| 67 | 1 | 0 | -0.049406 | -4.019981 | 1.514441  |
| 68 | 6 | 0 | -2.165177 | 1.487774  | 2.142749  |
| 69 | 1 | 0 | -1.404161 | 1.984766  | 1.541353  |
| 70 | 1 | 0 | -3.140626 | 1.627872  | 1.672908  |
| 71 | 1 | 0 | -2.188037 | 2.009076  | 3.101712  |
| 72 | 6 | 0 | -2.256278 | -2.274915 | 5.385045  |
| 73 | 1 | 0 | -1.722641 | -3.201575 | 5.607565  |
| 74 | 1 | 0 | -1.993055 | -1.539106 | 6.149475  |
| 75 | 1 | 0 | -3.327920 | -2.479132 | 5.485992  |

-----  
Compound 3 3-RF-TSab

Method: b3lyp/6-311g(d,p)

SCF Done: E(RB3LYP) = -1473.70395894 A.U. after 1 cycles

Lowest frequency = -57.6183

Zero-point correction= 0.632172  
(Hartree/Particle)

Thermal correction to Energy= 0.668431  
 Thermal correction to Enthalpy= 0.669375  
 Thermal correction to Gibbs Free Energy= 0.561887  
 Sum of electronic and zero-point Energies= -1473.071787  
 Sum of electronic and thermal Energies= -1473.035528  
 Sum of electronic and thermal Enthalpies= -1473.034584  
 Sum of electronic and thermal Free Energies= -1473.142072

Standard orientation:

| Center<br>Number | Atomic<br>Number | Atomic<br>Type | Coordinates (Angstroms) |           |           |
|------------------|------------------|----------------|-------------------------|-----------|-----------|
|                  |                  |                | X                       | Y         | Z         |
| 1                | 6                | 0              | 2.174986                | 1.358116  | 0.009119  |
| 2                | 6                | 0              | 2.464343                | 0.021705  | -0.439860 |
| 3                | 6                | 0              | 1.232043                | -0.543338 | -0.844345 |
| 4                | 7                | 0              | 0.157579                | 0.348119  | -0.592731 |
| 5                | 6                | 0              | 0.789458                | 1.558547  | -0.165704 |
| 6                | 6                | 0              | 0.270604                | 2.839441  | 0.030458  |
| 7                | 6                | 0              | 1.106025                | 3.860590  | 0.456682  |
| 8                | 6                | 0              | 2.474809                | 3.642110  | 0.686886  |
| 9                | 6                | 0              | 3.020152                | 2.387490  | 0.443155  |
| 10               | 6                | 0              | 3.669512                | -0.653230 | -0.638591 |
| 11               | 6                | 0              | 3.684583                | -1.886636 | -1.287279 |
| 12               | 6                | 0              | 2.465659                | -2.387707 | -1.772693 |
| 13               | 6                | 0              | 1.254065                | -1.729770 | -1.580092 |
| 14               | 6                | 0              | 4.979737                | -2.653301 | -1.517465 |
| 15               | 6                | 0              | 5.972471                | -1.868559 | -2.394113 |
| 16               | 6                | 0              | 5.633216                | -3.084188 | -0.191874 |
| 17               | 8                | 0              | 3.179257                | 4.732818  | 1.117738  |
| 18               | 6                | 0              | 4.569187                | 4.580051  | 1.353083  |
| 19               | 1                | 0              | -0.754496               | 3.067884  | -0.187233 |
| 20               | 1                | 0              | 0.718948                | 4.861764  | 0.602233  |
| 21               | 1                | 0              | 4.077942                | 2.195713  | 0.563467  |
| 22               | 1                | 0              | 4.597206                | -0.194035 | -0.312963 |
| 23               | 1                | 0              | 2.468418                | -3.311268 | -2.342936 |
| 24               | 1                | 0              | 0.366192                | -2.121388 | -2.049501 |
| 25               | 1                | 0              | 4.714541                | -3.566311 | -2.062883 |
| 26               | 1                | 0              | 6.864163                | -2.468402 | -2.600279 |
| 27               | 1                | 0              | 5.520194                | -1.589814 | -3.349091 |
| 28               | 1                | 0              | 6.298782                | -0.949088 | -1.899026 |
| 29               | 1                | 0              | 6.526226                | -3.688563 | -0.378361 |
| 30               | 1                | 0              | 4.942026                | -3.674304 | 0.414949  |
| 31               | 1                | 0              | 5.936597                | -2.215364 | 0.399961  |
| 32               | 1                | 0              | 4.923236                | 5.551027  | 1.696322  |
| 33               | 1                | 0              | 5.105859                | 4.304136  | 0.437550  |
| 34               | 1                | 0              | 4.766939                | 3.829295  | 2.127273  |
| 35               | 5                | 0              | -1.239311               | -0.057830 | -0.140552 |
| 36               | 6                | 0              | -2.578047               | 0.383609  | -0.971512 |
| 37               | 6                | 0              | -3.048891               | -0.672073 | -1.805145 |
| 38               | 6                | 0              | -3.384860               | 1.562198  | -0.984790 |
| 39               | 6                | 0              | -4.254369               | -0.601689 | -2.501470 |
| 40               | 6                | 0              | -4.598402               | 1.581113  | -1.687508 |
| 41               | 6                | 0              | -5.074159               | 0.515026  | -2.437449 |
| 42               | 1                | 0              | -4.549260               | -1.452749 | -3.109561 |
| 43               | 1                | 0              | -5.190475               | 2.490584  | -1.648095 |
| 44               | 6                | 0              | -1.418470               | -0.960011 | 1.216791  |
| 45               | 6                | 0              | -1.845480               | -0.203944 | 2.350764  |
| 46               | 6                | 0              | -1.219984               | -2.352622 | 1.459100  |
| 47               | 6                | 0              | -2.084573               | -0.795748 | 3.590202  |

|    |   |   |           |           |           |
|----|---|---|-----------|-----------|-----------|
| 48 | 6 | 0 | -1.493557 | -2.902176 | 2.720349  |
| 49 | 6 | 0 | -1.936751 | -2.159376 | 3.802520  |
| 50 | 1 | 0 | -2.390516 | -0.157433 | 4.414127  |
| 51 | 1 | 0 | -1.332727 | -3.967717 | 2.853294  |
| 52 | 6 | 0 | -3.056145 | 2.918374  | -0.385635 |
| 53 | 1 | 0 | -2.470325 | 2.892559  | 0.521517  |
| 54 | 1 | 0 | -2.521163 | 3.528339  | -1.122053 |
| 55 | 1 | 0 | -3.979604 | 3.452538  | -0.152157 |
| 56 | 6 | 0 | -2.232270 | -1.911263 | -2.065544 |
| 57 | 1 | 0 | -1.489414 | -2.091587 | -1.299435 |
| 58 | 1 | 0 | -2.862037 | -2.802992 | -2.114826 |
| 59 | 1 | 0 | -1.705255 | -1.824322 | -3.021997 |
| 60 | 6 | 0 | -6.409706 | 0.566161  | -3.135464 |
| 61 | 1 | 0 | -6.395324 | -0.006629 | -4.066039 |
| 62 | 1 | 0 | -7.198150 | 0.142479  | -2.503620 |
| 63 | 1 | 0 | -6.696996 | 1.593098  | -3.372755 |
| 64 | 6 | 0 | -0.728859 | -3.393538 | 0.470627  |
| 65 | 1 | 0 | -1.550325 | -3.823941 | -0.109759 |
| 66 | 1 | 0 | 0.022349  | -3.018876 | -0.213909 |
| 67 | 1 | 0 | -0.265859 | -4.217151 | 1.017209  |
| 68 | 6 | 0 | -2.068106 | 1.287916  | 2.308952  |
| 69 | 1 | 0 | -1.297892 | 1.812085  | 1.743263  |
| 70 | 1 | 0 | -3.046007 | 1.521777  | 1.883668  |
| 71 | 1 | 0 | -2.044416 | 1.702926  | 3.318425  |
| 72 | 6 | 0 | -2.240232 | -2.793127 | 5.136672  |
| 73 | 1 | 0 | -1.754302 | -3.766304 | 5.235428  |
| 74 | 1 | 0 | -1.905972 | -2.160888 | 5.963508  |
| 75 | 1 | 0 | -3.317593 | -2.948200 | 5.261298  |

-----

Compound 4 GS1

Method: b3lyp/6-311g(d,p)

SCF Done: E(RB3LYP) = -1696.37269099 A.U. after 1 cycles

Lowest frequency = 11.1638

Zero-point correction= 0.603949  
(Hartree/Particle)  
Thermal correction to Energy= 0.642580  
Thermal correction to Enthalpy= 0.643524  
Thermal correction to Gibbs Free Energy= 0.528062  
Sum of electronic and zero-point Energies= -1695.768742  
Sum of electronic and thermal Energies= -1695.730111  
Sum of electronic and thermal Enthalpies= -1695.729167  
Sum of electronic and thermal Free Energies= -1695.844629

Standard orientation:

-----

| Center<br>Number | Atomic<br>Number | Atomic<br>Type | Coordinates (Angstroms) |           |           |
|------------------|------------------|----------------|-------------------------|-----------|-----------|
|                  |                  |                | X                       | Y         | Z         |
| 1                | 6                | 0              | -2.242463               | 0.011632  | -0.113689 |
| 2                | 6                | 0              | -1.887205               | 1.375257  | 0.215554  |
| 3                | 6                | 0              | -0.479956               | 1.426091  | 0.285178  |
| 4                | 7                | 0              | 0.066828                | 0.135045  | 0.027661  |
| 5                | 6                | 0              | -1.038590               | -0.720232 | -0.211263 |
| 6                | 6                | 0              | -1.062793               | -2.069552 | -0.575936 |
| 7                | 6                | 0              | -2.292439               | -2.673909 | -0.798433 |
| 8                | 6                | 0              | -3.490513               | -1.953105 | -0.679956 |
| 9                | 6                | 0              | -3.471422               | -0.605621 | -0.342861 |

-----

|    |   |   |           |           |           |
|----|---|---|-----------|-----------|-----------|
| 10 | 6 | 0 | -2.658551 | 2.510235  | 0.466386  |
| 11 | 6 | 0 | -2.037782 | 3.713815  | 0.798961  |
| 12 | 6 | 0 | -0.635141 | 3.736607  | 0.882454  |
| 13 | 6 | 0 | 0.154354  | 2.615857  | 0.640314  |
| 14 | 6 | 0 | -2.845162 | 4.974516  | 1.077345  |
| 15 | 6 | 0 | -3.638500 | 5.434360  | -0.159177 |
| 16 | 6 | 0 | -3.768115 | 4.810436  | 2.298447  |
| 17 | 1 | 0 | -0.154353 | -2.642661 | -0.681234 |
| 18 | 1 | 0 | -2.326192 | -3.718691 | -1.081380 |
| 19 | 1 | 0 | -4.395663 | -0.046887 | -0.271994 |
| 20 | 1 | 0 | -3.739904 | 2.447061  | 0.407476  |
| 21 | 1 | 0 | -0.143314 | 4.665862  | 1.151316  |
| 22 | 1 | 0 | 1.228814  | 2.683474  | 0.722061  |
| 23 | 1 | 0 | -2.124900 | 5.765180  | 1.316180  |
| 24 | 1 | 0 | -4.156862 | 6.376355  | 0.043151  |
| 25 | 1 | 0 | -2.979143 | 5.585601  | -1.017470 |
| 26 | 1 | 0 | -4.392819 | 4.694965  | -0.444278 |
| 27 | 1 | 0 | -4.286517 | 5.748305  | 2.518980  |
| 28 | 1 | 0 | -3.200939 | 4.517635  | 3.185488  |
| 29 | 1 | 0 | -4.529093 | 4.044634  | 2.121277  |
| 30 | 5 | 0 | 1.474285  | -0.231042 | 0.014407  |
| 31 | 6 | 0 | 2.557429  | 0.858895  | -0.361982 |
| 32 | 6 | 0 | 2.486307  | 1.522882  | -1.612892 |
| 33 | 6 | 0 | 3.656964  | 1.147825  | 0.485455  |
| 34 | 6 | 0 | 3.487134  | 2.424268  | -1.982577 |
| 35 | 6 | 0 | 4.620672  | 2.075657  | 0.087907  |
| 36 | 6 | 0 | 4.559266  | 2.724700  | -1.145196 |
| 37 | 1 | 0 | 3.424678  | 2.905222  | -2.954599 |
| 38 | 1 | 0 | 5.448310  | 2.290857  | 0.757748  |
| 39 | 6 | 0 | 1.895644  | -1.712061 | 0.378685  |
| 40 | 6 | 0 | 2.699678  | -2.497709 | -0.485538 |
| 41 | 6 | 0 | 1.530416  | -2.261841 | 1.633832  |
| 42 | 6 | 0 | 3.092716  | -3.780249 | -0.100331 |
| 43 | 6 | 0 | 1.968336  | -3.539262 | 1.990417  |
| 44 | 6 | 0 | 2.741871  | -4.322161 | 1.136123  |
| 45 | 1 | 0 | 3.698178  | -4.369688 | -0.782882 |
| 46 | 1 | 0 | 1.695047  | -3.932546 | 2.965453  |
| 47 | 6 | 0 | 3.814659  | 0.502952  | 1.846358  |
| 48 | 1 | 0 | 2.947998  | 0.689514  | 2.487362  |
| 49 | 1 | 0 | 3.930970  | -0.580066 | 1.770187  |
| 50 | 1 | 0 | 4.690951  | 0.901568  | 2.361026  |
| 51 | 6 | 0 | 1.354252  | 1.298121  | -2.595329 |
| 52 | 1 | 0 | 1.041496  | 0.254302  | -2.653025 |
| 53 | 1 | 0 | 0.471013  | 1.882506  | -2.319542 |
| 54 | 1 | 0 | 1.652736  | 1.609608  | -3.598432 |
| 55 | 6 | 0 | 5.607266  | 3.733478  | -1.546673 |
| 56 | 1 | 0 | 5.678798  | 3.823735  | -2.632802 |
| 57 | 1 | 0 | 5.367167  | 4.726324  | -1.150226 |
| 58 | 1 | 0 | 6.592668  | 3.459754  | -1.161714 |
| 59 | 6 | 0 | 0.670869  | -1.516597 | 2.635634  |
| 60 | 1 | 0 | 0.891047  | -0.448828 | 2.675795  |
| 61 | 1 | 0 | -0.392150 | -1.615598 | 2.394541  |
| 62 | 1 | 0 | 0.816432  | -1.922863 | 3.638709  |
| 63 | 6 | 0 | 3.131627  | -2.005498 | -1.850844 |
| 64 | 1 | 0 | 2.275248  | -1.737048 | -2.476409 |
| 65 | 1 | 0 | 3.767364  | -1.120562 | -1.779587 |
| 66 | 1 | 0 | 3.689431  | -2.780618 | -2.379678 |
| 67 | 6 | 0 | 3.167638  | -5.716846 | 1.524047  |
| 68 | 1 | 0 | 2.451800  | -6.460682 | 1.156919  |
| 69 | 1 | 0 | 4.143339  | -5.968272 | 1.101281  |

|    |   |   |           |           |           |
|----|---|---|-----------|-----------|-----------|
| 70 | 1 | 0 | 3.227048  | -5.828594 | 2.608949  |
| 71 | 6 | 0 | -4.792462 | -2.668567 | -0.889719 |
| 72 | 9 | 0 | -5.110209 | -3.462769 | 0.162827  |
| 73 | 9 | 0 | -4.759120 | -3.476522 | -1.975709 |
| 74 | 9 | 0 | -5.828887 | -1.817953 | -1.059177 |

-----

Compound 4 GS2

Method: b3lyp/6-311g(d,p)

SCF Done: E(RB3LYP) = -1696.37288854 A.U. after 1 cycles

Lowest frequency = 9.5904

Zero-point correction= 0.604032  
(Hartree/Particle)  
Thermal correction to Energy= 0.642620  
Thermal correction to Enthalpy= 0.643564  
Thermal correction to Gibbs Free Energy= 0.528288  
Sum of electronic and zero-point Energies= -1695.768857  
Sum of electronic and thermal Energies= -1695.730269  
Sum of electronic and thermal Enthalpies= -1695.729325  
Sum of electronic and thermal Free Energies= -1695.844601

Standard orientation:

| Center<br>Number | Atomic<br>Number | Atomic<br>Type | Coordinates (Angstroms) |           |           |
|------------------|------------------|----------------|-------------------------|-----------|-----------|
|                  |                  |                | X                       | Y         | Z         |
| 1                | 6                | 0              | -2.253191               | 0.518847  | -0.118801 |
| 2                | 6                | 0              | -1.580737               | 1.762613  | 0.186297  |
| 3                | 6                | 0              | -0.203127               | 1.478865  | 0.249546  |
| 4                | 7                | 0              | 0.019784                | 0.091500  | 0.011821  |
| 5                | 6                | 0              | -1.258654               | -0.480138 | -0.208828 |
| 6                | 6                | 0              | -1.605656               | -1.790282 | -0.551322 |
| 7                | 6                | 0              | -2.945340               | -2.087984 | -0.759266 |
| 8                | 6                | 0              | -3.936735               | -1.101002 | -0.648029 |
| 9                | 6                | 0              | -3.595568               | 0.208191  | -0.333249 |
| 10               | 6                | 0              | -2.055506               | 3.055357  | 0.422213  |
| 11               | 6                | 0              | -1.165729               | 4.079449  | 0.732200  |
| 12               | 6                | 0              | 0.205731                | 3.769188  | 0.810441  |
| 13               | 6                | 0              | 0.700189                | 2.490165  | 0.583154  |
| 14               | 6                | 0              | -1.668610               | 5.492991  | 0.989310  |
| 15               | 6                | 0              | -1.372172               | 5.958096  | 2.426591  |
| 16               | 6                | 0              | -1.119993               | 6.495469  | -0.042184 |
| 17               | 1                | 0              | -0.860265               | -2.564479 | -0.650691 |
| 18               | 1                | 0              | -3.228811               | -3.098845 | -1.024869 |
| 19               | 1                | 0              | -4.359825               | 0.971793  | -0.268128 |
| 20               | 1                | 0              | -3.120007               | 3.260781  | 0.370363  |
| 21               | 1                | 0              | 0.913464                | 4.551608  | 1.061678  |
| 22               | 1                | 0              | 1.760171                | 2.299220  | 0.659231  |
| 23               | 1                | 0              | -2.758046               | 5.466805  | 0.872378  |
| 24               | 1                | 0              | -1.800723               | 6.948391  | 2.607209  |
| 25               | 1                | 0              | -1.792981               | 5.265736  | 3.159938  |
| 26               | 1                | 0              | -0.295536               | 6.024208  | 2.609236  |
| 27               | 1                | 0              | -1.545671               | 7.489772  | 0.122558  |
| 28               | 1                | 0              | -1.363009               | 6.185419  | -1.061537 |
| 29               | 1                | 0              | -0.031910               | 6.584060  | 0.029402  |
| 30               | 5                | 0              | 1.299880                | -0.599134 | -0.000356 |
| 31               | 6                | 0              | 2.607766                | 0.195384  | -0.401410 |



|    |   |   |           |           |           |
|----|---|---|-----------|-----------|-----------|
| 32 | 6 | 0 | 2.685337  | 0.836519  | -1.663859 |
| 33 | 6 | 0 | 3.752148  | 0.228015  | 0.435214  |
| 34 | 6 | 0 | 3.868616  | 1.467293  | -2.054802 |
| 35 | 6 | 0 | 4.905280  | 0.893099  | 0.016219  |
| 36 | 6 | 0 | 4.988954  | 1.517545  | -1.228242 |
| 37 | 1 | 0 | 3.913682  | 1.933089  | -3.035131 |
| 38 | 1 | 0 | 5.766398  | 0.916119  | 0.677975  |
| 39 | 6 | 0 | 1.359556  | -2.131385 | 0.389340  |
| 40 | 6 | 0 | 1.946395  | -3.100346 | -0.463532 |
| 41 | 6 | 0 | 0.884750  | -2.556878 | 1.655991  |
| 42 | 6 | 0 | 2.027007  | -4.432664 | -0.055974 |
| 43 | 6 | 0 | 1.009787  | -3.895452 | 2.034593  |
| 44 | 6 | 0 | 1.568157  | -4.854258 | 1.191970  |
| 45 | 1 | 0 | 2.469162  | -5.160792 | -0.729941 |
| 46 | 1 | 0 | 0.659185  | -4.195737 | 3.017933  |
| 47 | 6 | 0 | 3.764443  | -0.413708 | 1.806641  |
| 48 | 1 | 0 | 2.971802  | -0.017368 | 2.448057  |
| 49 | 1 | 0 | 3.621101  | -1.494637 | 1.749105  |
| 50 | 1 | 0 | 4.714423  | -0.225230 | 2.310314  |
| 51 | 6 | 0 | 1.523588  | 0.871365  | -2.636651 |
| 52 | 1 | 0 | 0.970726  | -0.068688 | -2.673495 |
| 53 | 1 | 0 | 0.807519  | 1.654041  | -2.367724 |
| 54 | 1 | 0 | 1.878739  | 1.085702  | -3.646726 |
| 55 | 6 | 0 | 6.243342  | 2.240763  | -1.653232 |
| 56 | 1 | 0 | 6.324624  | 2.292942  | -2.741169 |
| 57 | 1 | 0 | 6.250064  | 3.268817  | -1.274258 |
| 58 | 1 | 0 | 7.138639  | 1.746790  | -1.267795 |
| 59 | 6 | 0 | 0.235495  | -1.611479 | 2.647229  |
| 60 | 1 | 0 | 0.704367  | -0.626589 | 2.667265  |
| 61 | 1 | 0 | -0.822309 | -1.457803 | 2.411833  |
| 62 | 1 | 0 | 0.287828  | -2.023909 | 3.656963  |
| 63 | 6 | 0 | 2.469871  | -2.748430 | -1.840135 |
| 64 | 1 | 0 | 1.694824  | -2.297621 | -2.467000 |
| 65 | 1 | 0 | 3.296351  | -2.036629 | -1.789299 |
| 66 | 1 | 0 | 2.825056  | -3.642450 | -2.356066 |
| 67 | 6 | 0 | 1.653995  | -6.303254 | 1.604215  |
| 68 | 1 | 0 | 0.779303  | -6.862181 | 1.253491  |
| 69 | 1 | 0 | 2.538875  | -6.786217 | 1.182705  |
| 70 | 1 | 0 | 1.693711  | -6.407282 | 2.690782  |
| 71 | 6 | 0 | -5.372950 | -1.489694 | -0.840859 |
| 72 | 9 | 0 | -5.862278 | -2.168917 | 0.226322  |
| 73 | 9 | 0 | -5.540672 | -2.299602 | -1.912907 |
| 74 | 9 | 0 | -6.178987 | -0.420061 | -1.021227 |

-----  
Compound 4 1-RF-C1-TSa

Method: b3lyp/6-311g(d,p)

SCF Done: E(RB3LYP) = -1696.30075359 A.U. after 1 cycles

Lowest frequency = -39.7254

|                                              |              |
|----------------------------------------------|--------------|
| Zero-point correction=                       | 0.603914     |
| (Hartree/Particle)                           |              |
| Thermal correction to Energy=                | 0.640997     |
| Thermal correction to Enthalpy=              | 0.641941     |
| Thermal correction to Gibbs Free Energy=     | 0.532402     |
| Sum of electronic and zero-point Energies=   | -1695.696839 |
| Sum of electronic and thermal Energies=      | -1695.659757 |
| Sum of electronic and thermal Enthalpies=    | -1695.658813 |
| Sum of electronic and thermal Free Energies= | -1695.768352 |

## Standard orientation:

| Center<br>Number | Atomic<br>Number | Atomic<br>Type | Coordinates (Angstroms) |           |           |
|------------------|------------------|----------------|-------------------------|-----------|-----------|
|                  |                  |                | X                       | Y         | Z         |
| 1                | 6                | 0              | 2.259261                | 0.464625  | -0.091331 |
| 2                | 6                | 0              | 1.322511                | 1.519468  | 0.234436  |
| 3                | 6                | 0              | 0.071185                | 1.144759  | -0.311107 |
| 4                | 7                | 0              | 0.123444                | -0.231371 | -0.742566 |
| 5                | 6                | 0              | 1.526063                | -0.511052 | -0.793187 |
| 6                | 6                | 0              | 2.211204                | -1.380818 | -1.632787 |
| 7                | 6                | 0              | 3.602806                | -1.407232 | -1.595215 |
| 8                | 6                | 0              | 4.345466                | -0.548041 | -0.767340 |
| 9                | 6                | 0              | 3.652370                | 0.418515  | -0.039588 |
| 10               | 6                | 0              | 1.527395                | 2.786194  | 0.773610  |
| 11               | 6                | 0              | 0.496261                | 3.716611  | 0.708781  |
| 12               | 6                | 0              | -0.701664               | 3.388070  | 0.064693  |
| 13               | 6                | 0              | -0.920349               | 2.116299  | -0.455607 |
| 14               | 1                | 0              | 1.683787                | -1.993678 | -2.345673 |
| 15               | 1                | 0              | 4.122165                | -2.094927 | -2.253767 |
| 16               | 1                | 0              | 4.201617                | 1.171918  | 0.515911  |
| 17               | 1                | 0              | 2.485437                | 3.059209  | 1.196994  |
| 18               | 1                | 0              | -1.465735               | 4.145409  | -0.058513 |
| 19               | 1                | 0              | -1.835652               | 1.915891  | -0.984526 |
| 20               | 5                | 0              | -1.034997               | -1.144461 | -0.519742 |
| 21               | 6                | 0              | -2.437487               | -0.447797 | -0.813742 |
| 22               | 6                | 0              | -3.215541               | 0.235136  | 0.142614  |
| 23               | 6                | 0              | -2.910442               | -0.508687 | -2.145858 |
| 24               | 6                | 0              | -4.429991               | 0.816926  | -0.234629 |
| 25               | 6                | 0              | -4.126900               | 0.082532  | -2.486415 |
| 26               | 6                | 0              | -4.908788               | 0.750659  | -1.540798 |
| 27               | 1                | 0              | -5.015248               | 1.340567  | 0.516940  |
| 28               | 1                | 0              | -4.473219               | 0.021241  | -3.514523 |
| 29               | 6                | 0              | -0.994126               | -2.580686 | 0.190916  |
| 30               | 6                | 0              | 0.135994                | -3.440550 | 0.409654  |
| 31               | 6                | 0              | -2.114245               | -2.894696 | 1.040106  |
| 32               | 6                | 0              | 0.297504                | -4.118674 | 1.613151  |
| 33               | 6                | 0              | -1.915658               | -3.587142 | 2.241058  |
| 34               | 6                | 0              | -0.685302               | -4.119839 | 2.603846  |
| 35               | 1                | 0              | 1.187739                | -4.726953 | 1.748794  |
| 36               | 1                | 0              | -2.774620               | -3.751160 | 2.885618  |
| 37               | 6                | 0              | -2.109924               | -1.217574 | -3.218611 |
| 38               | 1                | 0              | -1.136217               | -0.741449 | -3.371188 |
| 39               | 1                | 0              | -1.921610               | -2.263426 | -2.953222 |
| 40               | 1                | 0              | -2.637589               | -1.208869 | -4.174305 |
| 41               | 6                | 0              | -2.773480               | 0.408185  | 1.581657  |
| 42               | 1                | 0              | -1.920529               | -0.219894 | 1.838911  |
| 43               | 1                | 0              | -2.486728               | 1.445748  | 1.775934  |
| 44               | 1                | 0              | -3.585910               | 0.165449  | 2.272979  |
| 45               | 6                | 0              | -6.237552               | 1.357520  | -1.922285 |
| 46               | 1                | 0              | -6.552356               | 2.114040  | -1.200246 |
| 47               | 1                | 0              | -6.193230               | 1.827340  | -2.908327 |
| 48               | 1                | 0              | -7.021852               | 0.593595  | -1.961876 |
| 49               | 6                | 0              | -3.578275               | -2.701448 | 0.677253  |
| 50               | 1                | 0              | -4.081277               | -1.937882 | 1.271765  |
| 51               | 1                | 0              | -3.733577               | -2.469641 | -0.370823 |
| 52               | 1                | 0              | -4.081690               | -3.650676 | 0.886109  |
| 53               | 6                | 0              | 1.046900                | -3.906935 | -0.707131 |
| 54               | 1                | 0              | 0.725744                | -3.538406 | -1.676829 |

|    |   |   |           |           |           |
|----|---|---|-----------|-----------|-----------|
| 55 | 1 | 0 | 2.096549  | -3.659703 | -0.552933 |
| 56 | 1 | 0 | 0.969447  | -4.998358 | -0.749786 |
| 57 | 6 | 0 | -0.459583 | -4.768513 | 3.943318  |
| 58 | 1 | 0 | -1.398580 | -5.098762 | 4.393080  |
| 59 | 1 | 0 | 0.207091  | -5.630982 | 3.864680  |
| 60 | 1 | 0 | 0.006382  | -4.060760 | 4.638145  |
| 61 | 6 | 0 | 0.657894  | 5.075940  | 1.321232  |
| 62 | 9 | 0 | 0.075399  | 5.153065  | 2.544168  |
| 63 | 9 | 0 | 1.955873  | 5.414331  | 1.492332  |
| 64 | 9 | 0 | 0.089234  | 6.046855  | 0.569160  |
| 65 | 6 | 0 | 5.865454  | -0.610591 | -0.722110 |
| 66 | 1 | 0 | 6.193739  | 0.183045  | -0.041383 |
| 67 | 6 | 0 | 6.362742  | -1.947695 | -0.142985 |
| 68 | 1 | 0 | 7.453176  | -1.948069 | -0.053850 |
| 69 | 1 | 0 | 5.939878  | -2.130044 | 0.848103  |
| 70 | 1 | 0 | 6.080963  | -2.786616 | -0.786427 |
| 71 | 6 | 0 | 6.502381  | -0.330014 | -2.095099 |
| 72 | 1 | 0 | 6.235712  | -1.100683 | -2.824250 |
| 73 | 1 | 0 | 6.174657  | 0.633618  | -2.492706 |
| 74 | 1 | 0 | 7.593374  | -0.313207 | -2.016074 |

-----

Compound 4 1-RF-C1-TSb

Method: b3lyp/6-311g(d,p)

SCF Done: E(RB3LYP) = -1696.30064915 A.U. after 1 cycles

Lowest frequency = -40.4996

Zero-point correction= 0.603909  
(Hartree/Particle)  
Thermal correction to Energy= 0.640986  
Thermal correction to Enthalpy= 0.641931  
Thermal correction to Gibbs Free Energy= 0.532208  
Sum of electronic and zero-point Energies= -1695.696740  
Sum of electronic and thermal Energies= -1695.659663  
Sum of electronic and thermal Enthalpies= -1695.658719  
Sum of electronic and thermal Free Energies= -1695.768441

Standard orientation:

| Center<br>Number | Atomic<br>Number | Atomic<br>Type | Coordinates (Angstroms) |           |           |
|------------------|------------------|----------------|-------------------------|-----------|-----------|
|                  |                  |                | X                       | Y         | Z         |
| 1                | 6                | 0              | 2.283116                | -0.118347 | -0.246277 |
| 2                | 6                | 0              | 1.626408                | 1.112808  | 0.142707  |
| 3                | 6                | 0              | 0.300500                | 1.048539  | -0.348529 |
| 4                | 7                | 0              | 0.017222                | -0.290802 | -0.805630 |
| 5                | 6                | 0              | 1.314924                | -0.881141 | -0.930979 |
| 6                | 6                | 0              | 1.744776                | -1.859369 | -1.815685 |
| 7                | 6                | 0              | 3.095752                | -2.204894 | -1.839559 |
| 8                | 6                | 0              | 4.048951                | -1.562722 | -1.036044 |
| 9                | 6                | 0              | 3.627914                | -0.479597 | -0.259939 |
| 10               | 6                | 0              | 2.138415                | 2.283596  | 0.693850  |
| 11               | 6                | 0              | 1.345595                | 3.425912  | 0.695952  |
| 12               | 6                | 0              | 0.077851                | 3.397177  | 0.104881  |
| 13               | 6                | 0              | -0.447889               | 2.223952  | -0.427385 |
| 14               | 1                | 0              | 1.062443                | -2.316988 | -2.513484 |
| 15               | 1                | 0              | 3.424107                | -2.977376 | -2.527580 |
| 16               | 1                | 0              | 4.350962                | 0.121040  | 0.281330  |
| 17               | 1                | 0              | 3.150854                | 2.319425  | 1.075126  |

|    |   |   |           |           |           |
|----|---|---|-----------|-----------|-----------|
| 18 | 1 | 0 | -0.497614 | 4.311620  | 0.033058  |
| 19 | 1 | 0 | -1.406923 | 2.252221  | -0.914384 |
| 20 | 5 | 0 | -1.308397 | -0.922236 | -0.544573 |
| 21 | 6 | 0 | -2.525032 | 0.084490  | -0.757029 |
| 22 | 6 | 0 | -3.084374 | 0.897649  | 0.249013  |
| 23 | 6 | 0 | -3.054996 | 0.174016  | -2.065909 |
| 24 | 6 | 0 | -4.147707 | 1.752701  | -0.057727 |
| 25 | 6 | 0 | -4.116321 | 1.037668  | -2.335766 |
| 26 | 6 | 0 | -4.683420 | 1.837563  | -1.340449 |
| 27 | 1 | 0 | -4.564940 | 2.373011  | 0.731397  |
| 28 | 1 | 0 | -4.510409 | 1.088579  | -3.347115 |
| 29 | 6 | 0 | -1.567772 | -2.350206 | 0.136079  |
| 30 | 6 | 0 | -0.656102 | -3.450612 | 0.286361  |
| 31 | 6 | 0 | -2.693951 | -2.424953 | 1.030817  |
| 32 | 6 | 0 | -0.604242 | -4.180968 | 1.468830  |
| 33 | 6 | 0 | -2.609526 | -3.177886 | 2.208603  |
| 34 | 6 | 0 | -1.519445 | -3.986276 | 2.504173  |
| 35 | 1 | 0 | 0.128269  | -4.979371 | 1.551983  |
| 36 | 1 | 0 | -3.455885 | -3.160198 | 2.889440  |
| 37 | 6 | 0 | -2.484497 | -0.666029 | -3.189713 |
| 38 | 1 | 0 | -1.434037 | -0.422312 | -3.377339 |
| 39 | 1 | 0 | -2.532739 | -1.734958 | -2.955635 |
| 40 | 1 | 0 | -3.034115 | -0.506004 | -4.119318 |
| 41 | 6 | 0 | -2.553708 | 0.921671  | 1.668191  |
| 42 | 1 | 0 | -1.858081 | 0.107540  | 1.871936  |
| 43 | 1 | 0 | -2.027983 | 1.859794  | 1.868430  |
| 44 | 1 | 0 | -3.370103 | 0.850857  | 2.393027  |
| 45 | 6 | 0 | -5.851836 | 2.743606  | -1.645934 |
| 46 | 1 | 0 | -5.960974 | 3.522691  | -0.888417 |
| 47 | 1 | 0 | -5.736131 | 3.229751  | -2.618224 |
| 48 | 1 | 0 | -6.790185 | 2.178922  | -1.675341 |
| 49 | 6 | 0 | -4.088679 | -1.893199 | 0.740270  |
| 50 | 1 | 0 | -4.378342 | -1.051942 | 1.371031  |
| 51 | 1 | 0 | -4.230156 | -1.602862 | -0.295158 |
| 52 | 1 | 0 | -4.786899 | -2.708195 | 0.955589  |
| 53 | 6 | 0 | 0.076975  | -4.081230 | -0.879683 |
| 54 | 1 | 0 | -0.192016 | -3.623278 | -1.826851 |
| 55 | 1 | 0 | 1.160880  | -4.082920 | -0.770923 |
| 56 | 1 | 0 | -0.248947 | -5.125031 | -0.936947 |
| 57 | 6 | 0 | -1.392511 | -4.706270 | 3.819996  |
| 58 | 1 | 0 | -2.362551 | -4.826203 | 4.307542  |
| 59 | 1 | 0 | -0.944812 | -5.695439 | 3.695043  |
| 60 | 1 | 0 | -0.748315 | -4.142878 | 4.504413  |
| 61 | 6 | 0 | 1.840249  | 4.694193  | 1.324973  |
| 62 | 9 | 0 | 1.350190  | 4.862361  | 2.578923  |
| 63 | 9 | 0 | 3.187920  | 4.725847  | 1.432279  |
| 64 | 9 | 0 | 1.470857  | 5.791125  | 0.623730  |
| 65 | 6 | 0 | 5.509202  | -1.990357 | -1.079759 |
| 66 | 1 | 0 | 5.572812  | -2.827836 | -1.783807 |
| 67 | 6 | 0 | 6.427950  | -0.874765 | -1.610113 |
| 68 | 1 | 0 | 7.457748  | -1.233699 | -1.696873 |
| 69 | 1 | 0 | 6.102894  | -0.530264 | -2.594900 |
| 70 | 1 | 0 | 6.434575  | -0.010657 | -0.939398 |
| 71 | 6 | 0 | 5.992476  | -2.502006 | 0.289433  |
| 72 | 1 | 0 | 5.965939  | -1.706874 | 1.040418  |
| 73 | 1 | 0 | 5.364549  | -3.320791 | 0.649505  |
| 74 | 1 | 0 | 7.022560  | -2.864871 | 0.224439  |

-----  
Compound 4 1-RF-C-TSa

Method: b3lyp/6-311g(d,p)  
 SCF Done: E(RB3LYP) = -1696.30031334 A.U. after 1 cycles  
 Lowest frequency = -39.4213

Zero-point correction= 0.603969  
 (Hartree/Particle)  
 Thermal correction to Energy= 0.641009  
 Thermal correction to Enthalpy= 0.641953  
 Thermal correction to Gibbs Free Energy= 0.532754  
 Sum of electronic and zero-point Energies= -1695.696345  
 Sum of electronic and thermal Energies= -1695.659304  
 Sum of electronic and thermal Enthalpies= -1695.658360  
 Sum of electronic and thermal Free Energies= -1695.767560

Standard orientation:

| Center<br>Number | Atomic<br>Number | Atomic<br>Type | Coordinates (Angstroms) |           |           |
|------------------|------------------|----------------|-------------------------|-----------|-----------|
|                  |                  |                | X                       | Y         | Z         |
| 1                | 6                | 0              | 2.093632                | 0.743301  | -0.006720 |
| 2                | 6                | 0              | 1.096489                | 1.719777  | 0.375362  |
| 3                | 6                | 0              | -0.128402               | 1.292533  | -0.179412 |
| 4                | 7                | 0              | 0.009056                | -0.060752 | -0.685907 |
| 5                | 6                | 0              | 1.418102                | -0.247406 | -0.753105 |
| 6                | 6                | 0              | 2.145181                | -1.040949 | -1.633265 |
| 7                | 6                | 0              | 3.534951                | -0.994650 | -1.603926 |
| 8                | 6                | 0              | 4.203577                | -0.125452 | -0.733709 |
| 9                | 6                | 0              | 3.484548                | 0.776966  | 0.044844  |
| 10               | 6                | 0              | 1.226411                | 2.973763  | 0.972982  |
| 11               | 6                | 0              | 0.153439                | 3.860855  | 0.976953  |
| 12               | 6                | 0              | -1.024146               | 3.463216  | 0.322524  |
| 13               | 6                | 0              | -1.177604               | 2.207541  | -0.260693 |
| 14               | 6                | 0              | 0.278891                | 5.232483  | 1.624153  |
| 15               | 6                | 0              | 0.124426                | 6.373281  | 0.602232  |
| 16               | 6                | 0              | -0.703341               | 5.402765  | 2.797369  |
| 17               | 1                | 0              | 1.647157                | -1.646653 | -2.372032 |
| 18               | 1                | 0              | 4.106748                | -1.608550 | -2.288250 |
| 19               | 1                | 0              | 4.002283                | 1.530224  | 0.624482  |
| 20               | 1                | 0              | 2.177867                | 3.272169  | 1.401801  |
| 21               | 1                | 0              | -1.850881               | 4.160841  | 0.242126  |
| 22               | 1                | 0              | -2.089237               | 1.978440  | -0.785066 |
| 23               | 1                | 0              | 1.293151                | 5.296516  | 2.034713  |
| 24               | 1                | 0              | 0.285538                | 7.343636  | 1.081248  |
| 25               | 1                | 0              | 0.844297                | 6.272180  | -0.213687 |
| 26               | 1                | 0              | -0.877845               | 6.382593  | 0.163978  |
| 27               | 1                | 0              | -0.552893               | 6.367951  | 3.290216  |
| 28               | 1                | 0              | -0.568045               | 4.614899  | 3.542582  |
| 29               | 1                | 0              | -1.741246               | 5.362811  | 2.453530  |
| 30               | 5                | 0              | -1.088055               | -1.058474 | -0.522694 |
| 31               | 6                | 0              | -2.530925               | -0.440983 | -0.797637 |
| 32               | 6                | 0              | -3.365021               | 0.137721  | 0.180237  |
| 33               | 6                | 0              | -2.984112               | -0.465857 | -2.137717 |
| 34               | 6                | 0              | -4.612569               | 0.652943  | -0.185171 |
| 35               | 6                | 0              | -4.234887               | 0.056968  | -2.465994 |
| 36               | 6                | 0              | -5.071487               | 0.620529  | -1.499815 |
| 37               | 1                | 0              | -5.241488               | 1.095059  | 0.583344  |
| 38               | 1                | 0              | -4.564795               | 0.023766  | -3.500774 |
| 39               | 6                | 0              | -0.953567               | -2.524286 | 0.113373  |
| 40               | 6                | 0              | 0.228870                | -3.321678 | 0.291408  |

|    |   |   |           |           |           |
|----|---|---|-----------|-----------|-----------|
| 41 | 6 | 0 | -2.048951 | -2.948265 | 0.946428  |
| 42 | 6 | 0 | 0.436965  | -4.041630 | 1.462679  |
| 43 | 6 | 0 | -1.803248 | -3.680490 | 2.115014  |
| 44 | 6 | 0 | -0.540482 | -4.149070 | 2.453370  |
| 45 | 1 | 0 | 1.363738  | -4.598811 | 1.569772  |
| 46 | 1 | 0 | -2.648299 | -3.928096 | 2.751234  |
| 47 | 6 | 0 | -2.125335 | -1.062433 | -3.233536 |
| 48 | 1 | 0 | -1.187234 | -0.510785 | -3.350923 |
| 49 | 1 | 0 | -1.865112 | -2.104132 | -3.017079 |
| 50 | 1 | 0 | -2.643735 | -1.044244 | -4.194148 |
| 51 | 6 | 0 | -2.950986 | 0.268926  | 1.631878  |
| 52 | 1 | 0 | -2.089678 | -0.350753 | 1.881965  |
| 53 | 1 | 0 | -2.686534 | 1.304341  | 1.865096  |
| 54 | 1 | 0 | -3.770528 | -0.013005 | 2.299383  |
| 55 | 6 | 0 | -6.435461 | 1.152104  | -1.869330 |
| 56 | 1 | 0 | -6.810426 | 1.847017  | -1.114759 |
| 57 | 1 | 0 | -6.413649 | 1.673640  | -2.829824 |
| 58 | 1 | 0 | -7.163869 | 0.338619  | -1.958497 |
| 59 | 6 | 0 | -3.522865 | -2.833948 | 0.590824  |
| 60 | 1 | 0 | -4.074615 | -2.137646 | 1.223495  |
| 61 | 1 | 0 | -3.694748 | -2.559361 | -0.444218 |
| 62 | 1 | 0 | -3.961379 | -3.824266 | 0.749382  |
| 63 | 6 | 0 | 1.160330  | -3.684242 | -0.847569 |
| 64 | 1 | 0 | 0.815575  | -3.291238 | -1.799474 |
| 65 | 1 | 0 | 2.195999  | -3.389190 | -0.682704 |
| 66 | 1 | 0 | 1.142759  | -4.775037 | -0.940521 |
| 67 | 6 | 0 | -0.269017 | -4.841421 | 3.762056  |
| 68 | 1 | 0 | -1.185021 | -5.241228 | 4.202632  |
| 69 | 1 | 0 | 0.442752  | -5.662085 | 3.642140  |
| 70 | 1 | 0 | 0.164206  | -4.139923 | 4.483863  |
| 71 | 6 | 0 | 5.702602  | -0.152966 | -0.671808 |
| 72 | 9 | 0 | 6.155186  | -1.129308 | 0.153846  |
| 73 | 9 | 0 | 6.222250  | 1.008161  | -0.214896 |
| 74 | 9 | 0 | 6.260344  | -0.390157 | -1.881824 |

-----

Compound 4 1-RF-C-TSb

Method: b3lyp/6-311g(d,p)

SCF Done: E(RB3LYP) = -1696.30016101 A.U. after 2 cycles

Lowest frequency = -39.6645

Zero-point correction= 0.603888  
(Hartree/Particle)  
Thermal correction to Energy= 0.640964  
Thermal correction to Enthalpy= 0.641908  
Thermal correction to Gibbs Free Energy= 0.532257  
Sum of electronic and zero-point Energies= -1695.696273  
Sum of electronic and thermal Energies= -1695.659197  
Sum of electronic and thermal Enthalpies= -1695.658253  
Sum of electronic and thermal Free Energies= -1695.767904

Standard orientation:

| Center<br>Number | Atomic<br>Number | Atomic<br>Type | Coordinates (Angstroms) |          |           |
|------------------|------------------|----------------|-------------------------|----------|-----------|
|                  |                  |                | X                       | Y        | Z         |
| 1                | 6                | 0              | 2.100371                | 0.480909 | -0.075436 |
| 2                | 6                | 0              | 1.249448                | 1.589323 | 0.303480  |
| 3                | 6                | 0              | -0.031493               | 1.321560 | -0.229491 |

|    |   |   |           |           |           |
|----|---|---|-----------|-----------|-----------|
| 4  | 7 | 0 | -0.084367 | -0.047326 | -0.710631 |
| 5  | 6 | 0 | 1.286486  | -0.420834 | -0.795778 |
| 6  | 6 | 0 | 1.886435  | -1.316367 | -1.673718 |
| 7  | 6 | 0 | 3.270343  | -1.456431 | -1.664903 |
| 8  | 6 | 0 | 4.063129  | -0.672838 | -0.818294 |
| 9  | 6 | 0 | 3.483689  | 0.328812  | -0.044351 |
| 10 | 6 | 0 | 1.558205  | 2.820836  | 0.876470  |
| 11 | 6 | 0 | 0.611434  | 3.845703  | 0.878573  |
| 12 | 6 | 0 | -0.615477 | 3.599360  | 0.247232  |
| 13 | 6 | 0 | -0.947667 | 2.366375  | -0.314919 |
| 14 | 6 | 0 | 0.908118  | 5.206372  | 1.492917  |
| 15 | 6 | 0 | 1.146251  | 5.108679  | 3.010646  |
| 16 | 6 | 0 | 2.081433  | 5.915747  | 0.792858  |
| 17 | 1 | 0 | 1.299763  | -1.859966 | -2.395492 |
| 18 | 1 | 0 | 3.743612  | -2.151078 | -2.347229 |
| 19 | 1 | 0 | 4.106993  | 1.014374  | 0.515113  |
| 20 | 1 | 0 | 2.550290  | 2.986380  | 1.282995  |
| 21 | 1 | 0 | -1.337148 | 4.406596  | 0.171463  |
| 22 | 1 | 0 | -1.890391 | 2.255510  | -0.822411 |
| 23 | 1 | 0 | 0.015384  | 5.823504  | 1.340391  |
| 24 | 1 | 0 | 1.293925  | 6.102610  | 3.443514  |
| 25 | 1 | 0 | 0.297054  | 4.640152  | 3.514320  |
| 26 | 1 | 0 | 2.036311  | 4.512950  | 3.234214  |
| 27 | 1 | 0 | 2.228861  | 6.917529  | 1.207249  |
| 28 | 1 | 0 | 1.899582  | 6.013884  | -0.280209 |
| 29 | 1 | 0 | 3.016211  | 5.362585  | 0.923712  |
| 30 | 5 | 0 | -1.301329 | -0.885839 | -0.510602 |
| 31 | 6 | 0 | -2.652535 | -0.080702 | -0.764006 |
| 32 | 6 | 0 | -3.374746 | 0.618008  | 0.224139  |
| 33 | 6 | 0 | -3.136944 | -0.057285 | -2.093131 |
| 34 | 6 | 0 | -4.548422 | 1.295937  | -0.119970 |
| 35 | 6 | 0 | -4.311567 | 0.629170  | -2.400337 |
| 36 | 6 | 0 | -5.039237 | 1.312744  | -1.423264 |
| 37 | 1 | 0 | -5.091599 | 1.828988  | 0.656201  |
| 38 | 1 | 0 | -4.667850 | 0.630965  | -3.426884 |
| 39 | 6 | 0 | -1.356093 | -2.348676 | 0.144528  |
| 40 | 6 | 0 | -0.289302 | -3.295974 | 0.318250  |
| 41 | 6 | 0 | -2.486697 | -2.611819 | 0.996873  |
| 42 | 6 | 0 | -0.163922 | -4.025193 | 1.495680  |
| 43 | 6 | 0 | -2.325866 | -3.358820 | 2.170732  |
| 44 | 6 | 0 | -1.133307 | -3.990149 | 2.499199  |
| 45 | 1 | 0 | 0.681164  | -4.700554 | 1.598383  |
| 46 | 1 | 0 | -3.187714 | -3.483570 | 2.820234  |
| 47 | 6 | 0 | -2.394355 | -0.777551 | -3.199457 |
| 48 | 1 | 0 | -1.391797 | -0.362494 | -3.343449 |
| 49 | 1 | 0 | -2.275852 | -1.843205 | -2.975695 |
| 50 | 1 | 0 | -2.926909 | -0.696594 | -4.149029 |
| 51 | 6 | 0 | -2.910708 | 0.706903  | 1.663796  |
| 52 | 1 | 0 | -2.127121 | -0.013466 | 1.899165  |
| 53 | 1 | 0 | -2.513640 | 1.703089  | 1.879436  |
| 54 | 1 | 0 | -3.741461 | 0.534053  | 2.354302  |
| 55 | 6 | 0 | -6.325497 | 2.023443  | -1.769711 |
| 56 | 1 | 0 | -6.589178 | 2.763242  | -1.010762 |
| 57 | 1 | 0 | -6.251057 | 2.536611  | -2.732127 |
| 58 | 1 | 0 | -7.158606 | 1.315797  | -1.843270 |
| 59 | 6 | 0 | -3.936743 | -2.301527 | 0.660280  |
| 60 | 1 | 0 | -4.377965 | -1.528200 | 1.290253  |
| 61 | 1 | 0 | -4.085995 | -2.018566 | -0.376034 |
| 62 | 1 | 0 | -4.504001 | -3.220404 | 0.839280  |
| 63 | 6 | 0 | 0.571314  | -3.791465 | -0.826263 |

|    |   |   |           |           |           |
|----|---|---|-----------|-----------|-----------|
| 64 | 1 | 0 | 0.266802  | -3.369519 | -1.779486 |
| 65 | 1 | 0 | 1.638664  | -3.630817 | -0.678614 |
| 66 | 1 | 0 | 0.411605  | -4.871905 | -0.902743 |
| 67 | 6 | 0 | -0.939989 | -4.699509 | 3.812649  |
| 68 | 1 | 0 | -1.895415 | -4.972496 | 4.266184  |
| 69 | 1 | 0 | -0.342348 | -5.606919 | 3.694902  |
| 70 | 1 | 0 | -0.411592 | -4.053476 | 4.522739  |
| 71 | 6 | 0 | 5.545796  | -0.899928 | -0.775800 |
| 72 | 9 | 0 | 5.877361  | -1.907198 | 0.069885  |
| 73 | 9 | 0 | 6.223728  | 0.191987  | -0.357005 |
| 74 | 9 | 0 | 6.046390  | -1.239675 | -1.986216 |

-----

Compound 4 1-RF-N-TSa

Method: b3lyp/6-311g(d,p)

SCF Done: E(RB3LYP) = -1696.27472634 A.U. after 1 cycles

Lowest frequency = -68.2255

Zero-point correction= 0.604502  
(Hartree/Particle)  
Thermal correction to Energy= 0.640916  
Thermal correction to Enthalpy= 0.641860  
Thermal correction to Gibbs Free Energy= 0.534609  
Sum of electronic and zero-point Energies= -1695.670225  
Sum of electronic and thermal Energies= -1695.633810  
Sum of electronic and thermal Enthalpies= -1695.632866  
Sum of electronic and thermal Free Energies= -1695.740118

Standard orientation:

| Center<br>Number | Atomic<br>Number | Atomic<br>Type | Coordinates (Angstroms) |           |           |
|------------------|------------------|----------------|-------------------------|-----------|-----------|
|                  |                  |                | X                       | Y         | Z         |
| 1                | 5                | 0              | -0.772443               | 1.626644  | -0.010846 |
| 2                | 6                | 0              | 3.814835                | 4.581198  | 1.947519  |
| 3                | 1                | 0              | 4.334158                | 4.167329  | 2.815000  |
| 4                | 1                | 0              | 4.460326                | 4.421703  | 1.076398  |
| 5                | 1                | 0              | 3.714350                | 5.660124  | 2.086010  |
| 6                | 6                | 0              | 2.478704                | 3.922079  | 1.737395  |
| 7                | 6                | 0              | 2.238075                | 2.606695  | 2.129363  |
| 8                | 1                | 0              | 2.986805                | 2.082139  | 2.715522  |
| 9                | 6                | 0              | 0.041066                | 2.570764  | 1.001416  |
| 10               | 6                | 0              | 1.379473                | 4.623626  | 1.248070  |
| 11               | 1                | 0              | 1.438699                | 5.704963  | 1.157997  |
| 12               | 6                | 0              | -4.388682               | 2.147380  | -1.377956 |
| 13               | 1                | 0              | -5.200751               | 2.868257  | -1.335442 |
| 14               | 6                | 0              | -4.650847               | 0.855163  | -1.825579 |
| 15               | 6                | 0              | -3.537163               | 0.086707  | -2.158175 |
| 16               | 1                | 0              | -3.675955               | -0.836894 | -2.712294 |
| 17               | 6                | 0              | -1.994816               | 1.666985  | -1.051896 |
| 18               | 6                | 0              | -6.053457               | 0.360793  | -2.054584 |
| 19               | 1                | 0              | -6.102643               | -0.327864 | -2.901341 |
| 20               | 1                | 0              | -6.415883               | -0.181181 | -1.173701 |
| 21               | 1                | 0              | -6.746171               | 1.185255  | -2.238303 |
| 22               | 6                | 0              | -3.096018               | 2.590435  | -1.097930 |
| 23               | 6                | 0              | 1.048131                | 1.946038  | 1.830767  |
| 24               | 6                | 0              | 0.849157                | 0.637023  | 2.572148  |
| 25               | 1                | 0              | -0.191808               | 0.329894  | 2.616199  |
| 26               | 1                | 0              | 1.437367                | -0.188495 | 2.165359  |



|    |   |   |           |           |           |
|----|---|---|-----------|-----------|-----------|
| 27 | 1 | 0 | 1.186672  | 0.790215  | 3.601531  |
| 28 | 6 | 0 | -2.928082 | 4.091113  | -1.146865 |
| 29 | 1 | 0 | -3.381223 | 4.426532  | -2.085160 |
| 30 | 1 | 0 | -3.435884 | 4.630002  | -0.344382 |
| 31 | 1 | 0 | -1.885534 | 4.380825  | -1.183010 |
| 32 | 6 | 0 | -2.238566 | 0.479277  | -1.840562 |
| 33 | 6 | 0 | -1.150854 | -0.331101 | -2.521048 |
| 34 | 1 | 0 | -0.203817 | 0.198119  | -2.578207 |
| 35 | 1 | 0 | -0.978102 | -1.304522 | -2.057009 |
| 36 | 1 | 0 | -1.477699 | -0.521376 | -3.547555 |
| 37 | 6 | 0 | 0.157756  | 4.004202  | 0.985530  |
| 38 | 6 | 0 | -1.028899 | 4.939593  | 0.988165  |
| 39 | 1 | 0 | -1.047128 | 5.650798  | 0.159834  |
| 40 | 1 | 0 | -1.968026 | 4.402803  | 1.033742  |
| 41 | 1 | 0 | -0.958703 | 5.530398  | 1.907069  |
| 42 | 7 | 0 | -0.184501 | 0.217422  | 0.026833  |
| 43 | 6 | 0 | -0.829188 | -0.942039 | 0.475951  |
| 44 | 6 | 0 | 1.091439  | -0.159199 | -0.378025 |
| 45 | 6 | 0 | 0.035572  | -2.055205 | 0.365677  |
| 46 | 6 | 0 | -2.104912 | -1.090892 | 1.027851  |
| 47 | 6 | 0 | 1.268501  | -1.556105 | -0.198459 |
| 48 | 6 | 0 | -0.388776 | -3.319351 | 0.790767  |
| 49 | 6 | 0 | -2.498612 | -2.356203 | 1.441001  |
| 50 | 1 | 0 | -2.776670 | -0.247355 | 1.127753  |
| 51 | 6 | 0 | 2.468917  | -2.163792 | -0.570095 |
| 52 | 1 | 0 | 0.276665  | -4.172891 | 0.704739  |
| 53 | 1 | 0 | -3.489626 | -2.472310 | 1.866447  |
| 54 | 6 | 0 | 3.475384  | -1.381490 | -1.122413 |
| 55 | 1 | 0 | 2.616376  | -3.228343 | -0.440142 |
| 56 | 6 | 0 | 3.288739  | 0.000966  | -1.311358 |
| 57 | 1 | 0 | 4.083720  | 0.586490  | -1.756894 |
| 58 | 6 | 0 | 2.104643  | 0.621421  | -0.949086 |
| 59 | 1 | 0 | 1.975370  | 1.685057  | -1.102972 |
| 60 | 6 | 0 | -1.660243 | -3.486418 | 1.330156  |
| 61 | 6 | 0 | -2.129289 | -4.857721 | 1.797210  |
| 62 | 1 | 0 | -1.305746 | -5.554954 | 1.604747  |
| 63 | 6 | 0 | -2.411073 | -4.888293 | 3.310462  |
| 64 | 1 | 0 | -2.682227 | -5.898106 | 3.633217  |
| 65 | 1 | 0 | -1.534051 | -4.571983 | 3.880596  |
| 66 | 1 | 0 | -3.238190 | -4.222449 | 3.574425  |
| 67 | 6 | 0 | -3.347183 | -5.355884 | 0.998026  |
| 68 | 1 | 0 | -4.217052 | -4.711312 | 1.156356  |
| 69 | 1 | 0 | -3.134895 | -5.371893 | -0.073922 |
| 70 | 1 | 0 | -3.624367 | -6.368593 | 1.306251  |
| 71 | 6 | 0 | 4.792400  | -1.985844 | -1.501549 |
| 72 | 9 | 0 | 5.190646  | -1.606740 | -2.741092 |
| 73 | 9 | 0 | 4.768442  | -3.337366 | -1.491177 |
| 74 | 9 | 0 | 5.789642  | -1.610015 | -0.659268 |

-----

Compound 4 1-RF-N-TSb

Method: b3lyp/6-311g(d,p)

SCF Done: E(RB3LYP) = -1696.27444925 A.U. after 1 cycles

Lowest frequency = -68.0616

Zero-point correction= 0.604475  
(Hartree/Particle)  
Thermal correction to Energy= 0.640899  
Thermal correction to Enthalpy= 0.641843

Thermal correction to Gibbs Free Energy= 0.534327  
 Sum of electronic and zero-point Energies= -1695.669975  
 Sum of electronic and thermal Energies= -1695.633550  
 Sum of electronic and thermal Enthalpies= -1695.632606  
 Sum of electronic and thermal Free Energies= -1695.740122

Standard orientation:

| Center<br>Number | Atomic<br>Number | Atomic<br>Type | Coordinates (Angstroms) |           |           |
|------------------|------------------|----------------|-------------------------|-----------|-----------|
|                  |                  |                | X                       | Y         | Z         |
| 1                | 5                | 0              | 1.530275                | -1.060775 | 0.021564  |
| 2                | 6                | 0              | -1.144584               | -5.888614 | 1.789863  |
| 3                | 1                | 0              | -1.817617               | -5.795677 | 2.645394  |
| 4                | 1                | 0              | -1.768583               | -6.029767 | 0.900112  |
| 5                | 1                | 0              | -0.546591               | -6.794037 | 1.916127  |
| 6                | 6                | 0              | -0.277919               | -4.668636 | 1.633821  |
| 7                | 6                | 0              | -0.702238               | -3.407592 | 2.047988  |
| 8                | 1                | 0              | -1.624999               | -3.317224 | 2.613404  |
| 9                | 6                | 0              | 1.240797                | -2.302802 | 0.996993  |
| 10               | 6                | 0              | 1.035056                | -4.750642 | 1.176191  |
| 11               | 1                | 0              | 1.499988                | -5.727477 | 1.073510  |
| 12               | 6                | 0              | 4.987536                | 0.233013  | -1.242291 |
| 13               | 1                | 0              | 6.043759                | -0.015087 | -1.180900 |
| 14               | 6                | 0              | 4.612453                | 1.502736  | -1.673270 |
| 15               | 6                | 0              | 3.274620                | 1.655270  | -2.031502 |
| 16               | 1                | 0              | 2.968770                | 2.544792  | -2.574243 |
| 17               | 6                | 0              | 2.647312                | -0.490855 | -0.982348 |
| 18               | 6                | 0              | 5.615096                | 2.609272  | -1.858955 |
| 19               | 1                | 0              | 5.348989                | 3.254604  | -2.699439 |
| 20               | 1                | 0              | 5.656414                | 3.241244  | -0.964562 |
| 21               | 1                | 0              | 6.620614                | 2.217383  | -2.028369 |
| 22               | 6                | 0              | 4.056123                | -0.777305 | -1.002438 |
| 23               | 6                | 0              | 0.037299                | -2.253371 | 1.797911  |
| 24               | 6                | 0              | -0.428350               | -1.026860 | 2.560530  |
| 25               | 1                | 0              | 0.338447                | -0.261656 | 2.640075  |
| 26               | 1                | 0              | -1.330738               | -0.572037 | 2.146037  |
| 27               | 1                | 0              | -0.673386               | -1.348450 | 3.577196  |
| 28               | 6                | 0              | 4.625280                | -2.175402 | -1.063296 |
| 29               | 1                | 0              | 5.208181                | -2.236826 | -1.987764 |
| 30               | 1                | 0              | 5.307061                | -2.422478 | -0.246975 |
| 31               | 1                | 0              | 3.848109                | -2.925807 | -1.134028 |
| 32               | 6                | 0              | 2.312978                | 0.686039  | -1.753817 |
| 33               | 6                | 0              | 0.984968                | 0.896925  | -2.457222 |
| 34               | 1                | 0              | 0.405953                | -0.017759 | -2.548458 |
| 35               | 1                | 0              | 0.359673                | 1.659239  | -1.987471 |
| 36               | 1                | 0              | 1.202627                | 1.244611  | -3.471340 |
| 37               | 6                | 0              | 1.821169                | -3.618482 | 0.963169  |
| 38               | 6                | 0              | 3.309567                | -3.876503 | 1.000775  |
| 39               | 1                | 0              | 3.687219                | -4.474368 | 0.168778  |
| 40               | 1                | 0              | 3.878085                | -2.958815 | 1.083216  |
| 41               | 1                | 0              | 3.503652                | -4.450307 | 1.912631  |
| 42               | 7                | 0              | 0.343086                | -0.100635 | 0.056359  |
| 43               | 6                | 0              | 0.351740                | 1.214626  | 0.538626  |
| 44               | 6                | 0              | -0.949746               | -0.363309 | -0.383580 |
| 45               | 6                | 0              | -0.936548               | 1.788316  | 0.414142  |
| 46               | 6                | 0              | 1.390253                | 1.935907  | 1.130113  |
| 47               | 6                | 0              | -1.772238               | 0.777651  | -0.194024 |
| 48               | 6                | 0              | -1.175076               | 3.089515  | 0.864339  |
| 49               | 6                | 0              | 1.123798                | 3.228117  | 1.567980  |

|    |   |   |           |           |           |
|----|---|---|-----------|-----------|-----------|
| 50 | 1 | 0 | 2.380040  | 1.511189  | 1.242457  |
| 51 | 6 | 0 | -3.108334 | 0.753285  | -0.596239 |
| 52 | 1 | 0 | -2.166848 | 3.518169  | 0.763440  |
| 53 | 1 | 0 | 1.926067  | 3.798079  | 2.025819  |
| 54 | 6 | 0 | -3.611137 | -0.398443 | -1.188894 |
| 55 | 1 | 0 | -3.745846 | 1.617423  | -0.459155 |
| 56 | 6 | 0 | -2.786972 | -1.522091 | -1.387224 |
| 57 | 1 | 0 | -3.198787 | -2.403108 | -1.864267 |
| 58 | 6 | 0 | -1.458605 | -1.516322 | -0.994830 |
| 59 | 1 | 0 | -0.836947 | -2.387527 | -1.156768 |
| 60 | 6 | 0 | -0.144850 | 3.827591  | 1.444924  |
| 61 | 6 | 0 | -0.371102 | 5.248188  | 1.946670  |
| 62 | 1 | 0 | 0.584481  | 5.594793  | 2.356716  |
| 63 | 6 | 0 | -0.755484 | 6.208911  | 0.806817  |
| 64 | 1 | 0 | -0.848585 | 7.233904  | 1.178563  |
| 65 | 1 | 0 | -0.003413 | 6.200598  | 0.013849  |
| 66 | 1 | 0 | -1.714102 | 5.929647  | 0.359468  |
| 67 | 6 | 0 | -1.404403 | 5.301902  | 3.086524  |
| 68 | 1 | 0 | -2.392837 | 4.984569  | 2.741123  |
| 69 | 1 | 0 | -1.114565 | 4.647375  | 3.912322  |
| 70 | 1 | 0 | -1.499955 | 6.320375  | 3.475168  |
| 71 | 6 | 0 | -5.048346 | -0.480665 | -1.602465 |
| 72 | 9 | 0 | -5.191522 | -0.974778 | -2.857076 |
| 73 | 9 | 0 | -5.667381 | 0.720857  | -1.578706 |
| 74 | 9 | 0 | -5.767542 | -1.302466 | -0.794649 |

-----

Compound 4 2-RF-CC-TSa

Method: b3lyp/6-311g(d,p)

SCF Done: E(RB3LYP) = -1696.35487040 A.U. after 1 cycles

Lowest frequency = -59.4467

Zero-point correction= 0.604365  
(Hartree/Particle)  
Thermal correction to Energy= 0.641855  
Thermal correction to Enthalpy= 0.642799  
Thermal correction to Gibbs Free Energy= 0.530647  
Sum of electronic and zero-point Energies= -1695.750506  
Sum of electronic and thermal Energies= -1695.713015  
Sum of electronic and thermal Enthalpies= -1695.712071  
Sum of electronic and thermal Free Energies= -1695.824223

Standard orientation:

| Center<br>Number | Atomic<br>Number | Atomic<br>Type | Coordinates (Angstroms) |           |           |
|------------------|------------------|----------------|-------------------------|-----------|-----------|
|                  |                  |                | X                       | Y         | Z         |
| 1                | 6                | 0              | 2.379256                | 0.261559  | -0.012565 |
| 2                | 6                | 0              | 1.850905                | 1.607396  | -0.009720 |
| 3                | 6                | 0              | 0.448805                | 1.504338  | -0.006712 |
| 4                | 7                | 0              | 0.058935                | 0.120467  | -0.008205 |
| 5                | 6                | 0              | 1.281574                | -0.623468 | -0.012736 |
| 6                | 6                | 0              | 1.500023                | -2.003350 | -0.020391 |
| 7                | 6                | 0              | 2.808514                | -2.470702 | -0.025587 |
| 8                | 6                | 0              | 3.897762                | -1.589409 | -0.024290 |
| 9                | 6                | 0              | 3.688407                | -0.216567 | -0.017528 |
| 10               | 6                | 0              | 2.483177                | 2.852092  | -0.009126 |
| 11               | 6                | 0              | 1.725059                | 4.019193  | -0.005718 |
| 12               | 6                | 0              | 0.324189                | 3.896800  | -0.002760 |

|    |   |   |           |           |           |
|----|---|---|-----------|-----------|-----------|
| 13 | 6 | 0 | -0.324780 | 2.666194  | -0.003145 |
| 14 | 6 | 0 | 2.399050  | 5.383763  | -0.005288 |
| 15 | 6 | 0 | 2.065248  | 6.190711  | -1.273091 |
| 16 | 6 | 0 | 2.070895  | 6.187148  | 1.266240  |
| 17 | 1 | 0 | 0.683906  | -2.706172 | -0.024625 |
| 18 | 1 | 0 | 2.986594  | -3.538882 | -0.038680 |
| 19 | 1 | 0 | 4.528372  | 0.465770  | -0.021316 |
| 20 | 1 | 0 | 3.566916  | 2.909936  | -0.011385 |
| 21 | 1 | 0 | -0.287996 | 4.791987  | -0.000084 |
| 22 | 1 | 0 | -1.401617 | 2.630567  | -0.000784 |
| 23 | 1 | 0 | 3.479941  | 5.202453  | -0.007957 |
| 24 | 1 | 0 | 2.612127  | 7.138177  | -1.281343 |
| 25 | 1 | 0 | 2.331711  | 5.635648  | -2.175941 |
| 26 | 1 | 0 | 0.997584  | 6.423119  | -1.326753 |
| 27 | 1 | 0 | 2.617737  | 7.134634  | 1.274672  |
| 28 | 1 | 0 | 2.341450  | 5.629597  | 2.166335  |
| 29 | 1 | 0 | 1.003466  | 6.419310  | 1.325346  |
| 30 | 5 | 0 | -1.283354 | -0.406759 | -0.003535 |
| 31 | 6 | 0 | -2.569981 | 0.559544  | 0.003929  |
| 32 | 6 | 0 | -3.183355 | 0.969292  | 1.214489  |
| 33 | 6 | 0 | -3.195217 | 0.973052  | -1.199274 |
| 34 | 6 | 0 | -4.430801 | 1.598148  | 1.200794  |
| 35 | 6 | 0 | -4.442413 | 1.601916  | -1.171339 |
| 36 | 6 | 0 | -5.106020 | 1.886096  | 0.018470  |
| 37 | 1 | 0 | -4.871652 | 1.895521  | 2.148794  |
| 38 | 1 | 0 | -4.892539 | 1.902322  | -2.114005 |
| 39 | 6 | 0 | -1.569340 | -1.991083 | -0.004663 |
| 40 | 6 | 0 | -1.730902 | -2.717608 | 1.202101  |
| 41 | 6 | 0 | -1.743225 | -2.713764 | -1.211992 |
| 42 | 6 | 0 | -2.191840 | -4.036351 | 1.181129  |
| 43 | 6 | 0 | -2.203967 | -4.032579 | -1.190601 |
| 44 | 6 | 0 | -2.478041 | -4.706427 | -0.004380 |
| 45 | 1 | 0 | -2.303218 | -4.561132 | 2.126332  |
| 46 | 1 | 0 | -2.324954 | -4.554338 | -2.136302 |
| 47 | 6 | 0 | -2.526334 | 0.881640  | -2.555538 |
| 48 | 1 | 0 | -2.614440 | 1.842828  | -3.069501 |
| 49 | 1 | 0 | -1.464096 | 0.654834  | -2.486126 |
| 50 | 1 | 0 | -2.994612 | 0.132224  | -3.198208 |
| 51 | 6 | 0 | -2.501130 | 0.873839  | 2.563809  |
| 52 | 1 | 0 | -1.440305 | 0.644202  | 2.483531  |
| 53 | 1 | 0 | -2.581442 | 1.834456  | 3.080136  |
| 54 | 1 | 0 | -2.965118 | 0.124699  | 3.209931  |
| 55 | 6 | 0 | -6.479207 | 2.510563  | 0.026200  |
| 56 | 1 | 0 | -7.258057 | 1.739942  | 0.029247  |
| 57 | 1 | 0 | -6.631761 | 3.130996  | 0.912657  |
| 58 | 1 | 0 | -6.640765 | 3.133120  | -0.857164 |
| 59 | 6 | 0 | -1.352348 | -2.168193 | -2.569796 |
| 60 | 1 | 0 | -2.222039 | -1.867802 | -3.158655 |
| 61 | 1 | 0 | -0.678829 | -1.315203 | -2.500811 |
| 62 | 1 | 0 | -0.831910 | -2.942300 | -3.139687 |
| 63 | 6 | 0 | -1.326853 | -2.176186 | 2.557691  |
| 64 | 1 | 0 | -0.651817 | -1.324705 | 2.484784  |
| 65 | 1 | 0 | -2.190649 | -1.874965 | 3.154725  |
| 66 | 1 | 0 | -0.803392 | -2.952858 | 3.121241  |
| 67 | 6 | 0 | -3.028651 | -6.110820 | -0.003772 |
| 68 | 1 | 0 | -2.703599 | -6.667647 | 0.878384  |
| 69 | 1 | 0 | -4.124238 | -6.100040 | 0.002283  |
| 70 | 1 | 0 | -2.713336 | -6.664611 | -0.891356 |
| 71 | 6 | 0 | 5.288961  | -2.152106 | 0.009562  |
| 72 | 9 | 0 | 5.451038  | -3.156339 | -0.883479 |

|    |   |   |          |           |           |
|----|---|---|----------|-----------|-----------|
| 73 | 9 | 0 | 5.595038 | -2.671292 | 1.223843  |
| 74 | 9 | 0 | 6.229733 | -1.221612 | -0.263588 |

-----

Compound 4 2-RF-CC-TSb

Method: b3lyp/6-311g(d,p)

SCF Done: E(RB3LYP) = -1696.35471899 A.U. after 1 cycles

Lowest frequency = -59.4540

|                                              |              |
|----------------------------------------------|--------------|
| Zero-point correction=                       | 0.604425     |
| (Hartree/Particle)                           |              |
| Thermal correction to Energy=                | 0.641867     |
| Thermal correction to Enthalpy=              | 0.642811     |
| Thermal correction to Gibbs Free Energy=     | 0.531317     |
| Sum of electronic and zero-point Energies=   | -1695.750294 |
| Sum of electronic and thermal Energies=      | -1695.712852 |
| Sum of electronic and thermal Enthalpies=    | -1695.711908 |
| Sum of electronic and thermal Free Energies= | -1695.823402 |

Standard orientation:

| Center<br>Number | Atomic<br>Number | Atomic<br>Type | Coordinates (Angstroms) |           |           |
|------------------|------------------|----------------|-------------------------|-----------|-----------|
|                  |                  |                | X                       | Y         | Z         |
| 1                | 6                | 0              | 2.324307                | -0.082245 | -0.013233 |
| 2                | 6                | 0              | 2.019539                | 1.331710  | -0.010000 |
| 3                | 6                | 0              | 0.616941                | 1.454976  | -0.006640 |
| 4                | 7                | 0              | 0.011002                | 0.150687  | -0.008305 |
| 5                | 6                | 0              | 1.098852                | -0.779237 | -0.013269 |
| 6                | 6                | 0              | 1.092737                | -2.176157 | -0.021510 |
| 7                | 6                | 0              | 2.309071                | -2.848029 | -0.027217 |
| 8                | 6                | 0              | 3.525645                | -2.153343 | -0.026212 |
| 9                | 6                | 0              | 3.539347                | -0.764508 | -0.018975 |
| 10               | 6                | 0              | 2.845058                | 2.454804  | -0.009151 |
| 11               | 6                | 0              | 2.282786                | 3.731044  | -0.005152 |
| 12               | 6                | 0              | 0.883379                | 3.834064  | -0.001975 |
| 13               | 6                | 0              | 0.040964                | 2.724142  | -0.002591 |
| 14               | 6                | 0              | 3.148791                | 4.983055  | -0.004326 |
| 15               | 6                | 0              | 4.016966                | 5.081309  | 1.263119  |
| 16               | 6                | 0              | 4.010042                | 5.087616  | -1.275993 |
| 17               | 1                | 0              | 0.173984                | -2.738362 | -0.026067 |
| 18               | 1                | 0              | 2.313341                | -3.930891 | -0.041232 |
| 19               | 1                | 0              | 4.478163                | -0.226110 | -0.023643 |
| 20               | 1                | 0              | 3.922248                | 2.327347  | -0.011603 |
| 21               | 1                | 0              | 0.431593                | 4.820741  | 0.001104  |
| 22               | 1                | 0              | -1.027149               | 2.864914  | -0.000020 |
| 23               | 1                | 0              | 2.465819                | 5.840017  | -0.000328 |
| 24               | 1                | 0              | 4.579163                | 6.019748  | 1.273333  |
| 25               | 1                | 0              | 3.403156                | 5.041802  | 2.166392  |
| 26               | 1                | 0              | 4.739369                | 4.261272  | 1.314392  |
| 27               | 1                | 0              | 4.572382                | 6.025988  | -1.284517 |
| 28               | 1                | 0              | 3.391275                | 5.052828  | -2.176075 |
| 29               | 1                | 0              | 4.731936                | 4.267678  | -1.335395 |
| 30               | 5                | 0              | -1.397457               | -0.158061 | -0.003505 |
| 31               | 6                | 0              | -2.511903               | 1.003722  | 0.004185  |
| 32               | 6                | 0              | -3.044227               | 1.514193  | 1.214903  |
| 33               | 6                | 0              | -3.055507               | 1.519780  | -1.199130 |
| 34               | 6                | 0              | -4.149472               | 2.368812  | 1.200813  |
| 35               | 6                | 0              | -4.160501               | 2.374356  | -1.170781 |

|    |   |   |           |           |           |
|----|---|---|-----------|-----------|-----------|
| 36 | 6 | 0 | -4.755258 | 2.783410  | 0.018779  |
| 37 | 1 | 0 | -4.528982 | 2.740210  | 2.149048  |
| 38 | 1 | 0 | -4.548805 | 2.750193  | -2.113693 |
| 39 | 6 | 0 | -1.934979 | -1.674661 | -0.004881 |
| 40 | 6 | 0 | -2.221034 | -2.361942 | 1.201697  |
| 41 | 6 | 0 | -2.231837 | -2.356049 | -1.212198 |
| 42 | 6 | 0 | -2.924119 | -3.568966 | 1.181127  |
| 43 | 6 | 0 | -2.934725 | -3.563177 | -1.191313 |
| 44 | 6 | 0 | -3.335824 | -4.170029 | -0.004749 |
| 45 | 1 | 0 | -3.129179 | -4.065540 | 2.126042  |
| 46 | 1 | 0 | -3.148197 | -4.055138 | -2.136781 |
| 47 | 6 | 0 | -2.438991 | 1.273847  | -2.560188 |
| 48 | 1 | 0 | -2.481657 | 2.190146  | -3.154247 |
| 49 | 1 | 0 | -1.391128 | 0.982204  | -2.497072 |
| 50 | 1 | 0 | -2.973239 | 0.503422  | -3.120475 |
| 51 | 6 | 0 | -2.415115 | 1.262040  | 2.569039  |
| 52 | 1 | 0 | -1.368100 | 0.969994  | 2.494942  |
| 53 | 1 | 0 | -2.451606 | 2.175827  | 3.167363  |
| 54 | 1 | 0 | -2.944647 | 0.489582  | 3.131000  |
| 55 | 6 | 0 | -5.981767 | 3.661625  | 0.026536  |
| 56 | 1 | 0 | -6.895028 | 3.056300  | 0.029128  |
| 57 | 1 | 0 | -6.011545 | 4.299519  | 0.913215  |
| 58 | 1 | 0 | -6.019540 | 4.303996  | -0.856601 |
| 59 | 6 | 0 | -1.710323 | -1.912807 | -2.563995 |
| 60 | 1 | 0 | -2.513060 | -1.593294 | -3.233158 |
| 61 | 1 | 0 | -0.984922 | -1.105025 | -2.492480 |
| 62 | 1 | 0 | -1.205657 | -2.752621 | -3.050289 |
| 63 | 6 | 0 | -1.688031 | -1.925037 | 2.551059  |
| 64 | 1 | 0 | -0.962366 | -1.117715 | 2.477104  |
| 65 | 1 | 0 | -2.484980 | -1.607553 | 3.228074  |
| 66 | 1 | 0 | -1.180299 | -2.767422 | 3.029609  |
| 67 | 6 | 0 | -4.147963 | -5.441220 | -0.004209 |
| 68 | 1 | 0 | -3.937044 | -6.050547 | 0.877932  |
| 69 | 1 | 0 | -5.220699 | -5.218348 | 0.001808  |
| 70 | 1 | 0 | -3.945933 | -6.045622 | -0.891800 |
| 71 | 6 | 0 | 4.809325  | -2.930462 | 0.011004  |
| 72 | 9 | 0 | 4.796173  | -3.972656 | -0.852352 |
| 73 | 9 | 0 | 5.046846  | -3.456536 | 1.237670  |
| 74 | 9 | 0 | 5.882376  | -2.170124 | -0.299404 |

-----

Compound 4 2-RF-CN-TSa

Method: b3lyp/6-311g(d,p)

SCF Done: E(RB3LYP) = -1696.33800773 A.U. after 1 cycles

Lowest frequency = -37.1346

Zero-point correction= 0.604461  
(Hartree/Particle)  
Thermal correction to Energy= 0.641564  
Thermal correction to Enthalpy= 0.642508  
Thermal correction to Gibbs Free Energy= 0.532379  
Sum of electronic and zero-point Energies= -1695.733547  
Sum of electronic and thermal Energies= -1695.696444  
Sum of electronic and thermal Enthalpies= -1695.695499  
Sum of electronic and thermal Free Energies= -1695.805628

Standard orientation:

-----

| Center | Atomic | Atomic | Coordinates (Angstroms) |
|--------|--------|--------|-------------------------|
|--------|--------|--------|-------------------------|

| Number | Number | Type | X         | Y         | Z         |
|--------|--------|------|-----------|-----------|-----------|
| 1      | 6      | 0    | 2.209075  | -0.300662 | -0.210880 |
| 2      | 6      | 0    | 1.995486  | 1.124005  | -0.186395 |
| 3      | 6      | 0    | 0.596770  | 1.318396  | -0.276859 |
| 4      | 7      | 0    | -0.065120 | 0.081021  | -0.307133 |
| 5      | 6      | 0    | 0.924566  | -0.898941 | -0.315316 |
| 6      | 6      | 0    | 0.808618  | -2.280472 | -0.515019 |
| 7      | 6      | 0    | 1.960828  | -3.050790 | -0.531635 |
| 8      | 6      | 0    | 3.229150  | -2.466492 | -0.369173 |
| 9      | 6      | 0    | 3.357980  | -1.090858 | -0.221753 |
| 10     | 6      | 0    | 2.861907  | 2.221247  | -0.167215 |
| 11     | 6      | 0    | 2.359944  | 3.514979  | -0.267422 |
| 12     | 6      | 0    | 0.967883  | 3.682021  | -0.416087 |
| 13     | 6      | 0    | 0.084641  | 2.610023  | -0.431262 |
| 14     | 6      | 0    | 3.296920  | 4.714765  | -0.245292 |
| 15     | 6      | 0    | 3.260302  | 5.504456  | -1.566355 |
| 16     | 6      | 0    | 3.024545  | 5.635738  | 0.957869  |
| 17     | 1      | 0    | -0.150786 | -2.746824 | -0.684879 |
| 18     | 1      | 0    | 1.886049  | -4.118779 | -0.695671 |
| 19     | 1      | 0    | 4.339569  | -0.642180 | -0.137636 |
| 20     | 1      | 0    | 3.933220  | 2.063375  | -0.090260 |
| 21     | 1      | 0    | 0.563434  | 4.681064  | -0.538288 |
| 22     | 1      | 0    | -0.970423 | 2.784113  | -0.587352 |
| 23     | 1      | 0    | 4.312516  | 4.319056  | -0.130073 |
| 24     | 1      | 0    | 3.989620  | 6.319971  | -1.549243 |
| 25     | 1      | 0    | 3.490562  | 4.859000  | -2.417628 |
| 26     | 1      | 0    | 2.274188  | 5.945857  | -1.739302 |
| 27     | 1      | 0    | 3.751089  | 6.453245  | 0.991611  |
| 28     | 1      | 0    | 3.088294  | 5.083633  | 1.898793  |
| 29     | 1      | 0    | 2.026678  | 6.080807  | 0.899114  |
| 30     | 5      | 0    | -1.547986 | -0.143076 | -0.013262 |
| 31     | 6      | 0    | -1.864290 | -0.217686 | 1.554475  |
| 32     | 6      | 0    | -1.798564 | -1.442791 | 2.259908  |
| 33     | 6      | 0    | -2.153315 | 0.947799  | 2.303403  |
| 34     | 6      | 0    | -1.913240 | -1.464377 | 3.651585  |
| 35     | 6      | 0    | -2.261825 | 0.885360  | 3.694385  |
| 36     | 6      | 0    | -2.114355 | -0.306683 | 4.398088  |
| 37     | 1      | 0    | -1.862533 | -2.422315 | 4.162368  |
| 38     | 1      | 0    | -2.488731 | 1.797871  | 4.239364  |
| 39     | 6      | 0    | -2.568987 | -0.270352 | -1.182831 |
| 40     | 6      | 0    | -2.173271 | -0.185218 | -2.565963 |
| 41     | 6      | 0    | -3.970930 | -0.480792 | -0.926945 |
| 42     | 6      | 0    | -3.127171 | -0.302248 | -3.576472 |
| 43     | 6      | 0    | -4.873164 | -0.589445 | -1.983234 |
| 44     | 6      | 0    | -4.479521 | -0.500895 | -3.315525 |
| 45     | 1      | 0    | -2.799550 | -0.237829 | -4.608935 |
| 46     | 1      | 0    | -5.922206 | -0.751419 | -1.757572 |
| 47     | 6      | 0    | -2.430557 | 2.290425  | 1.658189  |
| 48     | 1      | 0    | -1.555310 | 2.943487  | 1.687797  |
| 49     | 1      | 0    | -2.741023 | 2.192443  | 0.615472  |
| 50     | 1      | 0    | -3.237597 | 2.802732  | 2.188813  |
| 51     | 6      | 0    | -1.678747 | -2.784600 | 1.566087  |
| 52     | 1      | 0    | -2.002258 | -2.742310 | 0.523597  |
| 53     | 1      | 0    | -0.653812 | -3.162314 | 1.585913  |
| 54     | 1      | 0    | -2.307071 | -3.524783 | 2.068695  |
| 55     | 6      | 0    | -2.185854 | -0.344887 | 5.904691  |
| 56     | 1      | 0    | -2.574947 | -1.301180 | 6.262525  |
| 57     | 1      | 0    | -1.192075 | -0.211127 | 6.346098  |
| 58     | 1      | 0    | -2.825543 | 0.450344  | 6.294996  |

|    |   |   |           |           |           |
|----|---|---|-----------|-----------|-----------|
| 59 | 6 | 0 | -4.588836 | -0.604697 | 0.450313  |
| 60 | 1 | 0 | -4.178248 | -1.439700 | 1.017843  |
| 61 | 1 | 0 | -4.436145 | 0.287569  | 1.057389  |
| 62 | 1 | 0 | -5.664311 | -0.763071 | 0.354147  |
| 63 | 6 | 0 | -0.755915 | 0.025469  | -3.061165 |
| 64 | 1 | 0 | -0.326160 | 0.963961  | -2.710323 |
| 65 | 1 | 0 | -0.083062 | -0.774872 | -2.752056 |
| 66 | 1 | 0 | -0.755241 | 0.051030  | -4.152099 |
| 67 | 6 | 0 | -5.484869 | -0.590918 | -4.433219 |
| 68 | 1 | 0 | -5.885266 | 0.401357  | -4.669414 |
| 69 | 1 | 0 | -5.033796 | -0.986765 | -5.345540 |
| 70 | 1 | 0 | -6.329722 | -1.226940 | -4.160239 |
| 71 | 6 | 0 | 4.435781  | -3.353977 | -0.344705 |
| 72 | 9 | 0 | 4.400034  | -4.291323 | -1.323689 |
| 73 | 9 | 0 | 4.544616  | -4.037635 | 0.823134  |
| 74 | 9 | 0 | 5.589846  | -2.666784 | -0.497380 |

-----  
Compound 4 2-RF-CN-TSb

Method: b3lyp/6-311g(d,p)

SCF Done: E(RB3LYP) = -1696.33778030 A.U. after 2 cycles

Lowest frequency = -36.5623

Zero-point correction= 0.604499  
(Hartree/Particle)  
Thermal correction to Energy= 0.641590  
Thermal correction to Enthalpy= 0.642534  
Thermal correction to Gibbs Free Energy= 0.532313  
Sum of electronic and zero-point Energies= -1695.733281  
Sum of electronic and thermal Energies= -1695.696190  
Sum of electronic and thermal Enthalpies= -1695.695246  
Sum of electronic and thermal Free Energies= -1695.805467

Standard orientation:

| Center<br>Number | Atomic<br>Number | Atomic<br>Type | Coordinates (Angstroms) |           |           |
|------------------|------------------|----------------|-------------------------|-----------|-----------|
|                  |                  |                | X                       | Y         | Z         |
| 1                | 6                | 0              | 2.131651                | -0.347024 | -0.212461 |
| 2                | 6                | 0              | 1.974101                | 1.084764  | -0.271680 |
| 3                | 6                | 0              | 0.581749                | 1.327589  | -0.371500 |
| 4                | 7                | 0              | -0.126808               | 0.116535  | -0.326426 |
| 5                | 6                | 0              | 0.824643                | -0.899702 | -0.278976 |
| 6                | 6                | 0              | 0.654573                | -2.285000 | -0.396428 |
| 7                | 6                | 0              | 1.776156                | -3.099269 | -0.369580 |
| 8                | 6                | 0              | 3.066632                | -2.556377 | -0.244481 |
| 9                | 6                | 0              | 3.248850                | -1.180211 | -0.178821 |
| 10               | 6                | 0              | 2.883457                | 2.142950  | -0.317849 |
| 11               | 6                | 0              | 2.430153                | 3.449789  | -0.492226 |
| 12               | 6                | 0              | 1.047842                | 3.660361  | -0.647713 |
| 13               | 6                | 0              | 0.119910                | 2.624924  | -0.600377 |
| 14               | 6                | 0              | 3.395776                | 4.626718  | -0.542372 |
| 15               | 6                | 0              | 4.142211                | 4.813929  | 0.791016  |
| 16               | 6                | 0              | 4.383154                | 4.518519  | -1.718390 |
| 17               | 1                | 0              | -0.322871               | -2.723037 | -0.536249 |
| 18               | 1                | 0              | 1.659332                | -4.171355 | -0.469953 |
| 19               | 1                | 0              | 4.247450                | -0.765885 | -0.123382 |
| 20               | 1                | 0              | 3.945670                | 1.938086  | -0.233886 |
| 21               | 1                | 0              | 0.690823                | 4.669781  | -0.825851 |



|    |   |   |           |           |           |
|----|---|---|-----------|-----------|-----------|
| 22 | 1 | 0 | -0.927666 | 2.832428  | -0.765369 |
| 23 | 1 | 0 | 2.790605  | 5.525739  | -0.706555 |
| 24 | 1 | 0 | 4.780536  | 5.702030  | 0.756284  |
| 25 | 1 | 0 | 3.442038  | 4.928996  | 1.622174  |
| 26 | 1 | 0 | 4.781213  | 3.953523  | 1.011032  |
| 27 | 1 | 0 | 5.020257  | 5.406547  | -1.771231 |
| 28 | 1 | 0 | 3.854343  | 4.420947  | -2.669819 |
| 29 | 1 | 0 | 5.036806  | 3.648004  | -1.609607 |
| 30 | 5 | 0 | -1.615323 | -0.031055 | -0.013995 |
| 31 | 6 | 0 | -1.924181 | 0.000800  | 1.556521  |
| 32 | 6 | 0 | -1.902083 | -1.182549 | 2.332457  |
| 33 | 6 | 0 | -2.162137 | 1.218718  | 2.236821  |
| 34 | 6 | 0 | -2.008327 | -1.118189 | 3.723450  |
| 35 | 6 | 0 | -2.264029 | 1.241983  | 3.629529  |
| 36 | 6 | 0 | -2.158935 | 0.088265  | 4.401456  |
| 37 | 1 | 0 | -1.991948 | -2.045863 | 4.289372  |
| 38 | 1 | 0 | -2.451381 | 2.193068  | 4.120962  |
| 39 | 6 | 0 | -2.647580 | -0.188691 | -1.169918 |
| 40 | 6 | 0 | -2.257224 | -0.202304 | -2.557034 |
| 41 | 6 | 0 | -4.055019 | -0.329135 | -0.896611 |
| 42 | 6 | 0 | -3.220887 | -0.343802 | -3.555152 |
| 43 | 6 | 0 | -4.966984 | -0.466863 | -1.941018 |
| 44 | 6 | 0 | -4.578184 | -0.474411 | -3.277693 |
| 45 | 1 | 0 | -2.897184 | -0.354339 | -4.590807 |
| 46 | 1 | 0 | -6.020092 | -0.574365 | -1.702140 |
| 47 | 6 | 0 | -2.390756 | 2.531382  | 1.515349  |
| 48 | 1 | 0 | -1.490413 | 3.149967  | 1.502975  |
| 49 | 1 | 0 | -2.711485 | 2.385297  | 0.481447  |
| 50 | 1 | 0 | -3.173711 | 3.105087  | 2.018526  |
| 51 | 6 | 0 | -1.839474 | -2.566397 | 1.718124  |
| 52 | 1 | 0 | -2.166030 | -2.572220 | 0.675734  |
| 53 | 1 | 0 | -0.830379 | -2.983260 | 1.757517  |
| 54 | 1 | 0 | -2.494491 | -3.250062 | 2.264797  |
| 55 | 6 | 0 | -2.222026 | 0.141130  | 5.907993  |
| 56 | 1 | 0 | -2.645539 | -0.776651 | 6.323031  |
| 57 | 1 | 0 | -1.220943 | 0.261536  | 6.336550  |
| 58 | 1 | 0 | -2.827853 | 0.982213  | 6.253661  |
| 59 | 6 | 0 | -4.668836 | -0.345215 | 0.487911  |
| 60 | 1 | 0 | -4.288309 | -1.160368 | 1.103282  |
| 61 | 1 | 0 | -4.476891 | 0.575098  | 1.039349  |
| 62 | 1 | 0 | -5.750341 | -0.465840 | 0.405594  |
| 63 | 6 | 0 | -0.835980 | -0.075113 | -3.069223 |
| 64 | 1 | 0 | -0.369189 | 0.865272  | -2.775508 |
| 65 | 1 | 0 | -0.191957 | -0.881063 | -2.716331 |
| 66 | 1 | 0 | -0.840972 | -0.113365 | -4.159775 |
| 67 | 6 | 0 | -5.593053 | -0.593370 | -4.384024 |
| 68 | 1 | 0 | -5.965252 | 0.396552  | -4.670792 |
| 69 | 1 | 0 | -5.160154 | -1.050817 | -5.276073 |
| 70 | 1 | 0 | -6.454815 | -1.188039 | -4.073163 |
| 71 | 6 | 0 | 4.238576  | -3.486413 | -0.169190 |
| 72 | 9 | 0 | 4.159181  | -4.483060 | -1.084881 |
| 73 | 9 | 0 | 4.331071  | -4.096569 | 1.040041  |
| 74 | 9 | 0 | 5.416708  | -2.855351 | -0.372750 |

-----

Compound 4 3-RF-TSa

Method: b3lyp/6-311g(d,p)

SCF Done: E(RB3LYP) = -1696.29360417 A.U. after 1 cycles  
 Lowest frequency = -57.9164

Zero-point correction= 0.604619  
 (Hartree/Particle)  
 Thermal correction to Energy= 0.641933  
 Thermal correction to Enthalpy= 0.642877  
 Thermal correction to Gibbs Free Energy= 0.531197  
 Sum of electronic and zero-point Energies= -1695.688985  
 Sum of electronic and thermal Energies= -1695.651672  
 Sum of electronic and thermal Enthalpies= -1695.650727  
 Sum of electronic and thermal Free Energies= -1695.762407

Standard orientation:

| Center<br>Number | Atomic<br>Number | Atomic<br>Type | Coordinates (Angstroms) |           |           |
|------------------|------------------|----------------|-------------------------|-----------|-----------|
|                  |                  |                | X                       | Y         | Z         |
| 1                | 6                | 0              | -2.253080               | -0.549808 | -0.187388 |
| 2                | 6                | 0              | -2.210821               | 0.873989  | -0.383955 |
| 3                | 6                | 0              | -0.867651               | 1.200259  | -0.668554 |
| 4                | 7                | 0              | -0.037197               | 0.047808  | -0.577271 |
| 5                | 6                | 0              | -0.934596               | -1.031842 | -0.384530 |
| 6                | 6                | 0              | -0.715423               | -2.410350 | -0.408090 |
| 7                | 6                | 0              | -1.776644               | -3.274939 | -0.180539 |
| 8                | 6                | 0              | -3.068679               | -2.790473 | 0.067978  |
| 9                | 6                | 0              | -3.312236               | -1.423772 | 0.050883  |
| 10               | 6                | 0              | -3.222229               | 1.835101  | -0.458872 |
| 11               | 6                | 0              | -2.928842               | 3.131305  | -0.867615 |
| 12               | 6                | 0              | -1.604181               | 3.415916  | -1.248171 |
| 13               | 6                | 0              | -0.585515               | 2.473381  | -1.172801 |
| 14               | 6                | 0              | -4.019724               | 4.189109  | -0.949307 |
| 15               | 6                | 0              | -3.747546               | 5.366195  | 0.004845  |
| 16               | 6                | 0              | -4.242707               | 4.683360  | -2.390130 |
| 17               | 1                | 0              | 0.245686                | -2.818622 | -0.650509 |
| 18               | 1                | 0              | -1.606531               | -4.343820 | -0.220209 |
| 19               | 1                | 0              | -4.315106               | -1.045478 | 0.202262  |
| 20               | 1                | 0              | -4.246326               | 1.560023  | -0.227148 |
| 21               | 1                | 0              | -1.362034               | 4.397555  | -1.640735 |
| 22               | 1                | 0              | 0.388260                | 2.728349  | -1.556108 |
| 23               | 1                | 0              | -4.948940               | 3.709697  | -0.620880 |
| 24               | 1                | 0              | -4.574863               | 6.081732  | -0.019199 |
| 25               | 1                | 0              | -3.626251               | 5.019687  | 1.034117  |
| 26               | 1                | 0              | -2.836187               | 5.902254  | -0.276693 |
| 27               | 1                | 0              | -5.075814               | 5.391378  | -2.429574 |
| 28               | 1                | 0              | -4.469931               | 3.851832  | -3.061749 |
| 29               | 1                | 0              | -3.356235               | 5.193676  | -2.778332 |
| 30               | 5                | 0              | 1.421110                | 0.012041  | -0.112561 |
| 31               | 6                | 0              | 2.607791                | -0.591102 | -1.062078 |
| 32               | 6                | 0              | 3.113335                | -1.905888 | -1.302055 |
| 33               | 6                | 0              | 3.310244                | 0.451210  | -1.734386 |
| 34               | 6                | 0              | 4.280337                | -2.086270 | -2.058904 |
| 35               | 6                | 0              | 4.457421                | 0.221355  | -2.491407 |
| 36               | 6                | 0              | 4.987847                | -1.049969 | -2.650789 |
| 37               | 1                | 0              | 4.640700                | -3.101365 | -2.195569 |
| 38               | 1                | 0              | 4.941055                | 1.070953  | -2.965860 |
| 39               | 6                | 0              | 1.799607                | 0.589643  | 1.371915  |
| 40               | 6                | 0              | 2.025287                | -0.431586 | 2.344399  |
| 41               | 6                | 0              | 1.941814                | 1.925986  | 1.854695  |
| 42               | 6                | 0              | 2.395366                | -0.138618 | 3.656086  |

|    |   |   |           |           |           |
|----|---|---|-----------|-----------|-----------|
| 43 | 6 | 0 | 2.336057  | 2.165921  | 3.179009  |
| 44 | 6 | 0 | 2.582543  | 1.162264  | 4.101779  |
| 45 | 1 | 0 | 2.532633  | -0.964651 | 4.347830  |
| 46 | 1 | 0 | 2.437226  | 3.198955  | 3.497058  |
| 47 | 6 | 0 | 2.812770  | 1.873011  | -1.743950 |
| 48 | 1 | 0 | 2.261370  | 2.077082  | -2.668102 |
| 49 | 1 | 0 | 2.152770  | 2.089686  | -0.913561 |
| 50 | 1 | 0 | 3.638477  | 2.586397  | -1.686656 |
| 51 | 6 | 0 | 2.486942  | -3.234195 | -0.911920 |
| 52 | 1 | 0 | 1.928994  | -3.230530 | 0.013004  |
| 53 | 1 | 0 | 1.824257  | -3.581042 | -1.712623 |
| 54 | 1 | 0 | 3.266530  | -3.991364 | -0.806191 |
| 55 | 6 | 0 | 6.264860  | -1.292381 | -3.414628 |
| 56 | 1 | 0 | 7.138233  | -1.171681 | -2.764341 |
| 57 | 1 | 0 | 6.298968  | -2.304432 | -3.824248 |
| 58 | 1 | 0 | 6.374627  | -0.586621 | -4.241644 |
| 59 | 6 | 0 | 1.717241  | 3.209413  | 1.077885  |
| 60 | 1 | 0 | 2.611396  | 3.517392  | 0.528169  |
| 61 | 1 | 0 | 0.884814  | 3.154899  | 0.386786  |
| 62 | 1 | 0 | 1.486329  | 4.015569  | 1.776297  |
| 63 | 6 | 0 | 1.878235  | -1.902953 | 2.045029  |
| 64 | 1 | 0 | 1.016900  | -2.120466 | 1.413967  |
| 65 | 1 | 0 | 2.779348  | -2.292716 | 1.567705  |
| 66 | 1 | 0 | 1.730535  | -2.464631 | 2.969316  |
| 67 | 6 | 0 | 3.025008  | 1.463038  | 5.511300  |
| 68 | 1 | 0 | 2.537168  | 0.801260  | 6.231721  |
| 69 | 1 | 0 | 4.105874  | 1.322268  | 5.620887  |
| 70 | 1 | 0 | 2.797469  | 2.494419  | 5.789109  |
| 71 | 6 | 0 | -4.170513 | -3.762110 | 0.364962  |
| 72 | 9 | 0 | -4.095002 | -4.246190 | 1.630327  |
| 73 | 9 | 0 | -4.132478 | -4.841180 | -0.453076 |
| 74 | 9 | 0 | -5.397016 | -3.209041 | 0.236218  |

-----

Compound 4 3-RF-TSb

Method: b3lyp/6-311g(d,p)

SCF Done: E(RB3LYP) = -1696.29340032 A.U. after 1 cycles

Lowest frequency = -57.9087

Zero-point correction= 0.604587  
(Hartree/Particle)  
Thermal correction to Energy= 0.641916  
Thermal correction to Enthalpy= 0.642861  
Thermal correction to Gibbs Free Energy= 0.531018  
Sum of electronic and zero-point Energies= -1695.688813  
Sum of electronic and thermal Energies= -1695.651484  
Sum of electronic and thermal Enthalpies= -1695.650540  
Sum of electronic and thermal Free Energies= -1695.762382

Standard orientation:

-----

| Center<br>Number | Atomic<br>Number | Atomic<br>Type | Coordinates (Angstroms) |           |           |
|------------------|------------------|----------------|-------------------------|-----------|-----------|
|                  |                  |                | X                       | Y         | Z         |
| 1                | 6                | 0              | 2.194198                | 0.519321  | -0.203823 |
| 2                | 6                | 0              | 2.156125                | -0.890434 | -0.488411 |
| 3                | 6                | 0              | 0.809677                | -1.203716 | -0.781576 |
| 4                | 7                | 0              | -0.023403               | -0.062199 | -0.609855 |
| 5                | 6                | 0              | 0.872440                | 1.007009  | -0.359073 |

-----

|    |   |   |           |           |           |
|----|---|---|-----------|-----------|-----------|
| 6  | 6 | 0 | 0.648289  | 2.383404  | -0.295168 |
| 7  | 6 | 0 | 1.708412  | 3.236578  | -0.023207 |
| 8  | 6 | 0 | 3.004127  | 2.743052  | 0.183738  |
| 9  | 6 | 0 | 3.252109  | 1.380879  | 0.079349  |
| 10 | 6 | 0 | 3.170786  | -1.837107 | -0.631194 |
| 11 | 6 | 0 | 2.876684  | -3.109655 | -1.116572 |
| 12 | 6 | 0 | 1.551903  | -3.374341 | -1.499776 |
| 13 | 6 | 0 | 0.527354  | -2.442431 | -1.359887 |
| 14 | 6 | 0 | 3.955265  | -4.171022 | -1.282791 |
| 15 | 6 | 0 | 5.044313  | -3.740014 | -2.281789 |
| 16 | 6 | 0 | 4.571586  | -4.575791 | 0.068567  |
| 17 | 1 | 0 | -0.316326 | 2.802089  | -0.503410 |
| 18 | 1 | 0 | 1.533993  | 4.305133  | 0.005403  |
| 19 | 1 | 0 | 4.257658  | 0.998083  | 0.198239  |
| 20 | 1 | 0 | 4.192763  | -1.562567 | -0.392318 |
| 21 | 1 | 0 | 1.318071  | -4.335408 | -1.946499 |
| 22 | 1 | 0 | -0.448380 | -2.678990 | -1.749825 |
| 23 | 1 | 0 | 3.464471  | -5.058831 | -1.697695 |
| 24 | 1 | 0 | 5.768405  | -4.545919 | -2.434059 |
| 25 | 1 | 0 | 4.611171  | -3.482953 | -3.251604 |
| 26 | 1 | 0 | 5.593250  | -2.865873 | -1.919376 |
| 27 | 1 | 0 | 5.296741  | -5.384217 | -0.064219 |
| 28 | 1 | 0 | 3.803318  | -4.917689 | 0.766506  |
| 29 | 1 | 0 | 5.093203  | -3.734046 | 0.533687  |
| 30 | 5 | 0 | -1.477276 | -0.063935 | -0.130577 |
| 31 | 6 | 0 | -2.676511 | 0.590239  | -1.029172 |
| 32 | 6 | 0 | -3.188957 | 1.915199  | -1.183348 |
| 33 | 6 | 0 | -3.382251 | -0.411916 | -1.756783 |
| 34 | 6 | 0 | -4.364509 | 2.136773  | -1.915533 |
| 35 | 6 | 0 | -4.538097 | -0.140834 | -2.486569 |
| 36 | 6 | 0 | -5.074644 | 1.135617  | -2.562316 |
| 37 | 1 | 0 | -4.729820 | 3.156831  | -1.986185 |
| 38 | 1 | 0 | -5.023656 | -0.961775 | -3.007234 |
| 39 | 6 | 0 | -1.838407 | -0.734968 | 1.318683  |
| 40 | 6 | 0 | -2.058657 | 0.223375  | 2.354282  |
| 41 | 6 | 0 | -1.970355 | -2.099189 | 1.719646  |
| 42 | 6 | 0 | -2.415064 | -0.151317 | 3.648874  |
| 43 | 6 | 0 | -2.350800 | -2.421845 | 3.030321  |
| 44 | 6 | 0 | -2.592762 | -1.477953 | 4.015342  |
| 45 | 1 | 0 | -2.549057 | 0.630006  | 4.391342  |
| 46 | 1 | 0 | -2.444459 | -3.472952 | 3.285243  |
| 47 | 6 | 0 | -2.879621 | -1.828242 | -1.858823 |
| 48 | 1 | 0 | -2.334694 | -1.971828 | -2.798071 |
| 49 | 1 | 0 | -2.212453 | -2.093523 | -1.048527 |
| 50 | 1 | 0 | -3.702239 | -2.547220 | -1.840103 |
| 51 | 6 | 0 | -2.562467 | 3.219448  | -0.719443 |
| 52 | 1 | 0 | -1.996742 | 3.161722  | 0.198980  |
| 53 | 1 | 0 | -1.907414 | 3.615617  | -1.503358 |
| 54 | 1 | 0 | -3.342854 | 3.966697  | -0.561889 |
| 55 | 6 | 0 | -6.360566 | 1.419092  | -3.296498 |
| 56 | 1 | 0 | -7.226253 | 1.261066  | -2.643930 |
| 57 | 1 | 0 | -6.399987 | 2.452555  | -3.648119 |
| 58 | 1 | 0 | -6.479567 | 0.760830  | -4.160554 |
| 59 | 6 | 0 | -1.747729 | -3.331513 | 0.863484  |
| 60 | 1 | 0 | -2.646488 | -3.610789 | 0.305975  |
| 61 | 1 | 0 | -0.923555 | -3.229862 | 0.167852  |
| 62 | 1 | 0 | -1.504635 | -4.177347 | 1.508833  |
| 63 | 6 | 0 | -1.920141 | 1.711063  | 2.144718  |
| 64 | 1 | 0 | -1.066435 | 1.970783  | 1.519279  |
| 65 | 1 | 0 | -2.827688 | 2.125806  | 1.701834  |

|    |   |   |           |           |           |
|----|---|---|-----------|-----------|-----------|
| 66 | 1 | 0 | -1.764423 | 2.215281  | 3.100298  |
| 67 | 6 | 0 | -3.021213 | -1.867101 | 5.407451  |
| 68 | 1 | 0 | -2.538697 | -1.240963 | 6.162424  |
| 69 | 1 | 0 | -4.103375 | -1.749790 | 5.531165  |
| 70 | 1 | 0 | -2.776411 | -2.909326 | 5.623284  |
| 71 | 6 | 0 | 4.105139  | 3.698774  | 0.531015  |
| 72 | 9 | 0 | 4.037184  | 4.105686  | 1.823660  |
| 73 | 9 | 0 | 4.058145  | 4.824905  | -0.220397 |
| 74 | 9 | 0 | 5.332320  | 3.158500  | 0.360758  |

-----

Compound 5 GS1

Method: b3lyp/6-311g(d,p)

SCF Done: E(RB3LYP) = -1394.92187425 A.U. after 1 cycles

Lowest frequency = 20.8026

Zero-point correction= 0.562450  
(Hartree/Particle)  
Thermal correction to Energy= 0.595260  
Thermal correction to Enthalpy= 0.596204  
Thermal correction to Gibbs Free Energy= 0.497380  
Sum of electronic and zero-point Energies= -1394.359425  
Sum of electronic and thermal Energies= -1394.326614  
Sum of electronic and thermal Enthalpies= -1394.325670  
Sum of electronic and thermal Free Energies= -1394.424494

Standard orientation:

| Center<br>Number | Atomic<br>Number | Atomic<br>Type | Coordinates (Angstroms) |           |           |
|------------------|------------------|----------------|-------------------------|-----------|-----------|
|                  |                  |                | X                       | Y         | Z         |
| 1                | 5                | 0              | 0.584410                | 0.227458  | -0.048021 |
| 2                | 6                | 0              | 2.671926                | 1.331917  | -1.986681 |
| 3                | 1                | 0              | 2.090498                | 0.582761  | -2.530270 |
| 4                | 1                | 0              | 2.062888                | 2.237651  | -1.940960 |
| 5                | 1                | 0              | 3.560242                | 1.553178  | -2.581864 |
| 6                | 6                | 0              | 0.803122                | 2.926047  | 1.408301  |
| 7                | 1                | 0              | 0.576341                | 3.876237  | 1.896485  |
| 8                | 1                | 0              | 0.625308                | 2.132507  | 2.137754  |
| 9                | 1                | 0              | 1.873178                | 2.911011  | 1.186850  |
| 10               | 6                | 0              | -1.143792               | 0.271199  | -2.564099 |
| 11               | 1                | 0              | -0.254756               | -0.359529 | -2.607914 |
| 12               | 1                | 0              | -1.959547               | -0.350234 | -2.184138 |
| 13               | 1                | 0              | -1.398665               | 0.552969  | -3.587909 |
| 14               | 6                | 0              | -2.127024               | 5.141863  | -1.988918 |
| 15               | 1                | 0              | -3.085402               | 5.280449  | -1.476257 |
| 16               | 1                | 0              | -1.526039               | 6.035273  | -1.801169 |
| 17               | 1                | 0              | -2.333436               | 5.088476  | -3.060108 |
| 18               | 6                | 0              | -1.431727               | 3.896152  | -1.498404 |
| 19               | 6                | 0              | -0.662951               | 3.912588  | -0.334284 |
| 20               | 1                | 0              | -0.549494               | 4.845925  | 0.209964  |
| 21               | 6                | 0              | -0.027364               | 2.770452  | 0.149530  |
| 22               | 6                | 0              | -0.179119               | 1.527632  | -0.523758 |
| 23               | 6                | 0              | -0.950273               | 1.511641  | -1.714776 |
| 24               | 6                | 0              | -1.546983               | 2.687790  | -2.177890 |
| 25               | 1                | 0              | -2.118405               | 2.653492  | -3.101064 |
| 26               | 6                | 0              | 2.598339                | -0.172881 | 1.551076  |
| 27               | 6                | 0              | 3.948452                | -0.039161 | 1.881108  |
| 28               | 1                | 0              | 4.286519                | -0.384825 | 2.853873  |

|    |   |   |           |           |           |
|----|---|---|-----------|-----------|-----------|
| 29 | 6 | 0 | 4.875433  | 0.512939  | 0.998659  |
| 30 | 6 | 0 | 4.412403  | 0.939691  | -0.245719 |
| 31 | 1 | 0 | 5.119240  | 1.354664  | -0.958623 |
| 32 | 6 | 0 | 3.066457  | 0.850879  | -0.605234 |
| 33 | 6 | 0 | 2.127097  | 0.287478  | 0.295022  |
| 34 | 6 | 0 | 1.689667  | -0.821955 | 2.576314  |
| 35 | 1 | 0 | 1.415288  | -1.837677 | 2.278250  |
| 36 | 1 | 0 | 2.192202  | -0.885447 | 3.543582  |
| 37 | 1 | 0 | 0.756945  | -0.273630 | 2.725144  |
| 38 | 6 | 0 | 6.326211  | 0.664680  | 1.384893  |
| 39 | 1 | 0 | 6.980679  | 0.595249  | 0.512801  |
| 40 | 1 | 0 | 6.506811  | 1.639516  | 1.851561  |
| 41 | 1 | 0 | 6.630708  | -0.101430 | 2.101718  |
| 42 | 7 | 0 | -0.101464 | -1.065940 | 0.032781  |
| 43 | 6 | 0 | 0.467209  | -2.268257 | -0.491114 |
| 44 | 6 | 0 | -1.480619 | -1.338355 | 0.234056  |
| 45 | 6 | 0 | -0.559588 | -3.211807 | -0.710819 |
| 46 | 6 | 0 | 1.785603  | -2.574288 | -0.840680 |
| 47 | 6 | 0 | -1.787226 | -2.613788 | -0.250788 |
| 48 | 6 | 0 | -2.467716 | -0.580907 | 0.940477  |
| 49 | 6 | 0 | -0.275556 | -4.462633 | -1.266771 |
| 50 | 6 | 0 | 2.051722  | -3.827834 | -1.384296 |
| 51 | 1 | 0 | 2.590507  | -1.872753 | -0.688630 |
| 52 | 6 | 0 | -3.104502 | -3.122327 | -0.216396 |
| 53 | 6 | 0 | -3.807071 | -1.104978 | 0.942318  |
| 54 | 6 | 0 | -2.218205 | 0.589981  | 1.697490  |
| 55 | 6 | 0 | 1.035985  | -4.767883 | -1.599697 |
| 56 | 1 | 0 | -1.069645 | -5.182160 | -1.432577 |
| 57 | 1 | 0 | 3.074502  | -4.076764 | -1.643900 |
| 58 | 6 | 0 | -4.097393 | -2.360566 | 0.334341  |
| 59 | 1 | 0 | -3.318599 | -4.102929 | -0.626013 |
| 60 | 6 | 0 | -4.827721 | -0.380657 | 1.607444  |
| 61 | 6 | 0 | -3.227945 | 1.251105  | 2.357359  |
| 62 | 1 | 0 | -1.212729 | 0.970266  | 1.771048  |
| 63 | 1 | 0 | 1.277799  | -5.734332 | -2.026767 |
| 64 | 1 | 0 | -5.120221 | -2.720364 | 0.357551  |
| 65 | 6 | 0 | -4.553721 | 0.777522  | 2.293984  |
| 66 | 1 | 0 | -5.837951 | -0.775811 | 1.581870  |
| 67 | 1 | 0 | -2.998936 | 2.140322  | 2.933561  |
| 68 | 1 | 0 | -5.346405 | 1.312557  | 2.804498  |

-----

Compound 5 1-RF-C-TS

Method: b3lyp/6-311g(d,p)

SCF Done: E(RB3LYP) = -1394.85345131 A.U. after 1 cycles

Lowest frequency = -26.3568

|                                              |              |
|----------------------------------------------|--------------|
| Zero-point correction=                       | 0.562008     |
| (Hartree/Particle)                           |              |
| Thermal correction to Energy=                | 0.593378     |
| Thermal correction to Enthalpy=              | 0.594322     |
| Thermal correction to Gibbs Free Energy=     | 0.500661     |
| Sum of electronic and zero-point Energies=   | -1394.291443 |
| Sum of electronic and thermal Energies=      | -1394.260073 |
| Sum of electronic and thermal Enthalpies=    | -1394.259129 |
| Sum of electronic and thermal Free Energies= | -1394.352790 |

Standard orientation:

-----

| Center<br>Number | Atomic<br>Number | Atomic<br>Type | Coordinates (Angstroms) |           |           |
|------------------|------------------|----------------|-------------------------|-----------|-----------|
|                  |                  |                | X                       | Y         | Z         |
| 1                | 5                | 0              | 0.562984                | 0.366060  | 0.394355  |
| 2                | 6                | 0              | -1.448969               | 5.065526  | -2.373955 |
| 3                | 1                | 0              | -0.698033               | 5.825795  | -2.600923 |
| 4                | 1                | 0              | -1.727447               | 4.586746  | -3.319545 |
| 5                | 1                | 0              | -2.340983               | 5.566822  | -1.989890 |
| 6                | 6                | 0              | -0.925616               | 4.044200  | -1.398868 |
| 7                | 6                | 0              | 0.435272                | 3.816907  | -1.233177 |
| 8                | 1                | 0              | 1.144371                | 4.472799  | -1.730456 |
| 9                | 6                | 0              | 0.043983                | 1.871550  | 0.218859  |
| 10               | 6                | 0              | -1.774565               | 3.346206  | -0.540890 |
| 11               | 1                | 0              | -2.818848               | 3.638055  | -0.469549 |
| 12               | 6                | 0              | 3.868030                | -0.447782 | 2.236810  |
| 13               | 1                | 0              | 4.165585                | -0.616021 | 3.268344  |
| 14               | 6                | 0              | 4.830089                | -0.518683 | 1.227811  |
| 15               | 6                | 0              | 4.410630                | -0.298776 | -0.082048 |
| 16               | 1                | 0              | 5.140508                | -0.350247 | -0.886008 |
| 17               | 6                | 0              | 2.112769                | 0.063039  | 0.624496  |
| 18               | 6                | 0              | 6.278977                | -0.792697 | 1.552770  |
| 19               | 1                | 0              | 6.813448                | -1.189761 | 0.686806  |
| 20               | 1                | 0              | 6.793013                | 0.123472  | 1.864121  |
| 21               | 1                | 0              | 6.375640                | -1.512109 | 2.370064  |
| 22               | 6                | 0              | 2.530721                | -0.164564 | 1.956088  |
| 23               | 6                | 0              | 0.940712                | 2.810126  | -0.400753 |
| 24               | 6                | 0              | 2.428228                | 2.937844  | -0.113779 |
| 25               | 1                | 0              | 2.727725                | 2.439342  | 0.802131  |
| 26               | 1                | 0              | 3.063939                | 2.573461  | -0.921195 |
| 27               | 1                | 0              | 2.642806                | 4.004259  | 0.001822  |
| 28               | 6                | 0              | 1.538501                | -0.119430 | 3.099451  |
| 29               | 1                | 0              | 2.048789                | -0.134037 | 4.064693  |
| 30               | 1                | 0              | 0.920466                | 0.783231  | 3.063887  |
| 31               | 1                | 0              | 0.862385                | -0.980340 | 3.070692  |
| 32               | 6                | 0              | 3.080037                | -0.012107 | -0.400281 |
| 33               | 6                | 0              | 2.743145                | 0.189794  | -1.864581 |
| 34               | 1                | 0              | 2.757743                | -0.762314 | -2.401222 |
| 35               | 1                | 0              | 1.757758                | 0.632301  | -2.013749 |
| 36               | 1                | 0              | 3.478515                | 0.841689  | -2.345210 |
| 37               | 6                | 0              | -1.308579               | 2.337377  | 0.296421  |
| 38               | 6                | 0              | -2.210650               | 1.985201  | 1.454121  |
| 39               | 1                | 0              | -3.197654               | 1.634364  | 1.151189  |
| 40               | 1                | 0              | -1.766099               | 1.257884  | 2.122659  |
| 41               | 1                | 0              | -2.356432               | 2.899868  | 2.040128  |
| 42               | 7                | 0              | -0.245430               | -0.862386 | 0.128150  |
| 43               | 6                | 0              | 0.313992                | -1.814640 | -0.812924 |
| 44               | 6                | 0              | -1.652988               | -0.950636 | -0.133555 |
| 45               | 6                | 0              | -0.623875               | -2.055968 | -1.843384 |
| 46               | 6                | 0              | 1.497155                | -2.541164 | -0.761425 |
| 47               | 6                | 0              | -1.884488               | -1.485505 | -1.401224 |
| 48               | 6                | 0              | -2.710496               | -0.935748 | 0.814282  |
| 49               | 6                | 0              | -0.314990               | -2.913983 | -2.898320 |
| 50               | 6                | 0              | 1.782274                | -3.419796 | -1.809207 |
| 51               | 1                | 0              | 2.176910                | -2.450987 | 0.071270  |
| 52               | 6                | 0              | -3.197637               | -1.621141 | -1.901798 |
| 53               | 6                | 0              | -4.047032               | -1.080786 | 0.308524  |
| 54               | 6                | 0              | -2.514051               | -0.958641 | 2.219558  |
| 55               | 1                | 0              | -1.033767               | -3.094597 | -3.689850 |
| 56               | 1                | 0              | 2.697628                | -3.999562 | -1.770755 |
| 57               | 6                | 0              | -4.257211               | -1.349475 | -1.073395 |

|    |   |   |           |           |           |
|----|---|---|-----------|-----------|-----------|
| 58 | 1 | 0 | -3.363070 | -1.970619 | -2.914616 |
| 59 | 6 | 0 | -5.126329 | -1.063062 | 1.228936  |
| 60 | 6 | 0 | -3.581537 | -1.010033 | 3.082460  |
| 61 | 1 | 0 | -1.501513 | -0.957217 | 2.603187  |
| 62 | 1 | 0 | -5.275453 | -1.440047 | -1.435928 |
| 63 | 6 | 0 | -4.904128 | -1.021017 | 2.584725  |
| 64 | 1 | 0 | -6.137951 | -1.130186 | 0.842047  |
| 65 | 1 | 0 | -3.410108 | -1.046966 | 4.152422  |
| 66 | 1 | 0 | -5.739905 | -1.035132 | 3.274995  |
| 67 | 6 | 0 | 0.906243  | -3.581662 | -2.885565 |
| 68 | 1 | 0 | 1.157412  | -4.266380 | -3.687495 |

-----

Compound 5 1-RF-C1-TS

Method: b3lyp/6-311g(d,p)

SCF Done: E(RB3LYP) = -1394.84760961 A.U. after 1 cycles

Lowest frequency = -38.1445

Zero-point correction= 0.561813  
(Hartree/Particle)  
Thermal correction to Energy= 0.593227  
Thermal correction to Enthalpy= 0.594171  
Thermal correction to Gibbs Free Energy= 0.500203  
Sum of electronic and zero-point Energies= -1394.285796  
Sum of electronic and thermal Energies= -1394.254383  
Sum of electronic and thermal Enthalpies= -1394.253438  
Sum of electronic and thermal Free Energies= -1394.347406

Standard orientation:

| Center<br>Number | Atomic<br>Number | Atomic<br>Type | Coordinates (Angstroms) |           |           |
|------------------|------------------|----------------|-------------------------|-----------|-----------|
|                  |                  |                | X                       | Y         | Z         |
| 1                | 6                | 0              | 4.280489                | -2.877341 | -3.007488 |
| 2                | 1                | 0              | 3.978230                | -3.786793 | -3.531687 |
| 3                | 1                | 0              | 4.277524                | -2.060727 | -3.738260 |
| 4                | 1                | 0              | 5.311239                | -3.002584 | -2.666338 |
| 5                | 6                | 0              | 3.353466                | -2.563618 | -1.863452 |
| 6                | 6                | 0              | 2.056756                | -3.059204 | -1.810356 |
| 7                | 1                | 0              | 1.739500                | -3.791288 | -2.547671 |
| 8                | 6                | 0              | 1.495481                | -1.675966 | 0.147558  |
| 9                | 6                | 0              | 3.782230                | -1.845383 | -0.747357 |
| 10               | 1                | 0              | 4.840781                | -1.630671 | -0.628115 |
| 11               | 6                | 0              | -3.013700               | -2.112741 | 1.902472  |
| 12               | 1                | 0              | -3.392969               | -2.428736 | 2.870735  |
| 13               | 6                | 0              | -3.837844               | -2.215515 | 0.777479  |
| 14               | 6                | 0              | -3.319914               | -1.797908 | -0.443349 |
| 15               | 1                | 0              | -3.944650               | -1.858102 | -1.330638 |
| 16               | 6                | 0              | -1.191444               | -1.203733 | 0.563051  |
| 17               | 6                | 0              | -5.233699               | -2.780320 | 0.890295  |
| 18               | 1                | 0              | -5.820527               | -2.572695 | -0.006934 |
| 19               | 1                | 0              | -5.210289               | -3.866999 | 1.026599  |
| 20               | 1                | 0              | -5.766428               | -2.359415 | 1.747770  |
| 21               | 6                | 0              | -1.714026               | -1.619001 | 1.813894  |
| 22               | 6                | 0              | 1.151155                | -2.700795 | -0.804384 |
| 23               | 6                | 0              | -0.075960               | -3.595984 | -0.736493 |
| 24               | 1                | 0              | -0.582188               | -3.556513 | 0.222047  |
| 25               | 1                | 0              | -0.810756               | -3.392818 | -1.516103 |
| 26               | 1                | 0              | 0.272405                | -4.622435 | -0.887307 |



|    |   |   |           |           |           |
|----|---|---|-----------|-----------|-----------|
| 27 | 6 | 0 | -0.871140 | -1.538094 | 3.070034  |
| 28 | 1 | 0 | -1.416979 | -1.919737 | 3.935185  |
| 29 | 1 | 0 | 0.049990  | -2.122887 | 2.974445  |
| 30 | 1 | 0 | -0.578351 | -0.506132 | 3.289682  |
| 31 | 6 | 0 | -2.020315 | -1.294548 | -0.569832 |
| 32 | 6 | 0 | -1.573595 | -0.864391 | -1.951252 |
| 33 | 1 | 0 | -2.114181 | 0.030608  | -2.269926 |
| 34 | 1 | 0 | -0.507913 | -0.639763 | -1.999844 |
| 35 | 1 | 0 | -1.783686 | -1.645001 | -2.688995 |
| 36 | 6 | 0 | 2.911291  | -1.467974 | 0.269800  |
| 37 | 6 | 0 | 3.582252  | -1.109567 | 1.578087  |
| 38 | 1 | 0 | 4.212154  | -0.222674 | 1.516049  |
| 39 | 1 | 0 | 2.872462  | -0.986703 | 2.389006  |
| 40 | 1 | 0 | 4.227034  | -1.953007 | 1.849280  |
| 41 | 5 | 0 | 0.312001  | -0.687651 | 0.582465  |
| 42 | 7 | 0 | 0.462929  | 0.789016  | 0.828186  |
| 43 | 6 | 0 | 1.680297  | 1.453145  | 1.164302  |
| 44 | 6 | 0 | -0.153811 | 1.698683  | -0.121809 |
| 45 | 6 | 0 | 1.991234  | 2.437096  | 0.202975  |
| 46 | 6 | 0 | 2.362602  | 1.416103  | 2.372659  |
| 47 | 6 | 0 | 0.825935  | 2.545739  | -0.653268 |
| 48 | 6 | 0 | -1.528726 | 1.971398  | -0.382358 |
| 49 | 6 | 0 | 3.113080  | 3.251105  | 0.363809  |
| 50 | 6 | 0 | 3.461936  | 2.256966  | 2.545609  |
| 51 | 1 | 0 | 2.030228  | 0.774614  | 3.178163  |
| 52 | 6 | 0 | 0.530139  | 3.450969  | -1.694675 |
| 53 | 6 | 0 | -1.818148 | 2.895596  | -1.448436 |
| 54 | 6 | 0 | -2.608347 | 1.526454  | 0.424162  |
| 55 | 1 | 0 | 3.359490  | 4.007460  | -0.372931 |
| 56 | 6 | 0 | 3.860163  | 3.136580  | 1.533511  |
| 57 | 1 | 0 | 3.999631  | 2.242710  | 3.486838  |
| 58 | 6 | 0 | -0.764005 | 3.569475  | -2.126340 |
| 59 | 1 | 0 | 1.319359  | 4.053412  | -2.130147 |
| 60 | 6 | 0 | -3.171868 | 3.195959  | -1.745005 |
| 61 | 6 | 0 | -3.903726 | 1.888390  | 0.140857  |
| 62 | 1 | 0 | -2.401126 | 0.910372  | 1.285536  |
| 63 | 1 | 0 | 4.718893  | 3.779726  | 1.689270  |
| 64 | 1 | 0 | -1.016853 | 4.248315  | -2.933452 |
| 65 | 6 | 0 | -4.196523 | 2.699372  | -0.976103 |
| 66 | 1 | 0 | -3.381692 | 3.864280  | -2.573749 |
| 67 | 1 | 0 | -4.706293 | 1.546613  | 0.784113  |
| 68 | 1 | 0 | -5.224848 | 2.957036  | -1.203833 |

-----

Compound 5 1-RF-N-TS

Method: b3lyp/6-311g(d,p)

SCF Done: E(RB3LYP) = -1394.83132896 A.U. after 1 cycles

Lowest frequency = -70.7751

|                                              |              |
|----------------------------------------------|--------------|
| Zero-point correction=                       | 0.562881     |
| (Hartree/Particle)                           |              |
| Thermal correction to Energy=                | 0.593709     |
| Thermal correction to Enthalpy=              | 0.594653     |
| Thermal correction to Gibbs Free Energy=     | 0.502863     |
| Sum of electronic and zero-point Energies=   | -1394.268448 |
| Sum of electronic and thermal Energies=      | -1394.237620 |
| Sum of electronic and thermal Enthalpies=    | -1394.236676 |
| Sum of electronic and thermal Free Energies= | -1394.328466 |

## Standard orientation:

| Center<br>Number | Atomic<br>Number | Atomic<br>Type | Coordinates (Angstroms) |           |           |
|------------------|------------------|----------------|-------------------------|-----------|-----------|
|                  |                  |                | X                       | Y         | Z         |
| 1                | 5                | 0              | 0.467365                | 0.877667  | -0.189991 |
| 2                | 6                | 0              | -4.939238               | 2.640060  | -1.185488 |
| 3                | 1                | 0              | -5.482498               | 2.163647  | -2.005130 |
| 4                | 1                | 0              | -5.357495               | 2.252582  | -0.249722 |
| 5                | 1                | 0              | -5.138605               | 3.713797  | -1.215244 |
| 6                | 6                | 0              | -3.465845               | 2.346110  | -1.254223 |
| 7                | 6                | 0              | -2.976831               | 1.161268  | -1.798077 |
| 8                | 1                | 0              | -3.659942               | 0.488864  | -2.308665 |
| 9                | 6                | 0              | -0.682795               | 1.637376  | -1.017248 |
| 10               | 6                | 0              | -2.506956               | 3.285832  | -0.882185 |
| 11               | 1                | 0              | -2.815780               | 4.310241  | -0.691389 |
| 12               | 6                | 0              | 4.021779                | 2.195785  | 0.771704  |
| 13               | 1                | 0              | 4.630835                | 3.090637  | 0.675235  |
| 14               | 6                | 0              | 4.633260                | 0.991801  | 1.106946  |
| 15               | 6                | 0              | 3.780759                | -0.034362 | 1.506614  |
| 16               | 1                | 0              | 4.200379                | -0.920785 | 1.972989  |
| 17               | 6                | 0              | 1.781797                | 1.170856  | 0.695086  |
| 18               | 6                | 0              | 6.130047                | 0.841208  | 1.147081  |
| 19               | 1                | 0              | 6.443902                | 0.171519  | 1.951414  |
| 20               | 1                | 0              | 6.496199                | 0.413026  | 0.207147  |
| 21               | 1                | 0              | 6.628182                | 1.803706  | 1.284247  |
| 22               | 6                | 0              | 2.636427                | 2.325407  | 0.664139  |
| 23               | 6                | 0              | -1.627693               | 0.817354  | -1.742875 |
| 24               | 6                | 0              | -1.236536               | -0.349412 | -2.630003 |
| 25               | 1                | 0              | -0.173764               | -0.373473 | -2.851812 |
| 26               | 1                | 0              | -1.529623               | -1.320766 | -2.227152 |
| 27               | 1                | 0              | -1.763542               | -0.225655 | -3.580890 |
| 28               | 6                | 0              | 2.140756                | 3.747064  | 0.782159  |
| 29               | 1                | 0              | 2.650878                | 4.192350  | 1.641833  |
| 30               | 1                | 0              | 2.371612                | 4.377640  | -0.078849 |
| 31               | 1                | 0              | 1.079585                | 3.787217  | 0.991834  |
| 32               | 6                | 0              | 2.397273                | 0.043298  | 1.361279  |
| 33               | 6                | 0              | 1.632939                | -1.052885 | 2.080068  |
| 34               | 1                | 0              | 0.612259                | -0.767895 | 2.319094  |
| 35               | 1                | 0              | 1.610901                | -1.997836 | 1.532804  |
| 36               | 1                | 0              | 2.145005                | -1.244819 | 3.027542  |
| 37               | 6                | 0              | -1.144398               | 2.991618  | -0.861715 |
| 38               | 6                | 0              | -0.245054               | 4.202888  | -0.959925 |
| 39               | 1                | 0              | -0.258570               | 4.851491  | -0.081467 |
| 40               | 1                | 0              | 0.774775                | 3.931494  | -1.201031 |
| 41               | 1                | 0              | -0.617719               | 4.801585  | -1.797127 |
| 42               | 7                | 0              | 0.269821                | -0.635409 | -0.284938 |
| 43               | 6                | 0              | 1.146879                | -1.461075 | -0.997543 |
| 44               | 6                | 0              | -0.757081               | -1.451011 | 0.202167  |
| 45               | 6                | 0              | 0.664965                | -2.792156 | -0.990612 |
| 46               | 6                | 0              | 2.306417                | -1.121771 | -1.704827 |
| 47               | 6                | 0              | -0.547757               | -2.777760 | -0.216908 |
| 48               | 6                | 0              | -1.837603               | -1.125978 | 1.082898  |
| 49               | 6                | 0              | 1.362130                | -3.793904 | -1.678266 |
| 50               | 6                | 0              | 2.981809                | -2.131713 | -2.377401 |
| 51               | 1                | 0              | 2.677338                | -0.104739 | -1.725159 |
| 52               | 6                | 0              | -1.445175               | -3.808429 | 0.144738  |
| 53               | 6                | 0              | -2.735593               | -2.193155 | 1.428647  |
| 54               | 6                | 0              | -2.056265               | 0.145660  | 1.668822  |
| 55               | 1                | 0              | 0.999624                | -4.816198 | -1.676850 |

|    |   |   |           |           |           |
|----|---|---|-----------|-----------|-----------|
| 56 | 1 | 0 | 3.885998  | -1.888313 | -2.924194 |
| 57 | 6 | 0 | -2.523143 | -3.514632 | 0.933066  |
| 58 | 1 | 0 | -1.273955 | -4.821326 | -0.202950 |
| 59 | 6 | 0 | -3.821340 | -1.917222 | 2.295737  |
| 60 | 6 | 0 | -3.111579 | 0.371729  | 2.523965  |
| 61 | 1 | 0 | -1.385645 | 0.964163  | 1.444132  |
| 62 | 1 | 0 | -3.226242 | -4.289960 | 1.217018  |
| 63 | 6 | 0 | -4.013021 | -0.665888 | 2.833188  |
| 64 | 1 | 0 | -4.500604 | -2.726880 | 2.542255  |
| 65 | 1 | 0 | -3.247259 | 1.354810  | 2.960415  |
| 66 | 1 | 0 | -4.846682 | -0.479282 | 3.500921  |
| 67 | 6 | 0 | 2.519094  | -3.458814 | -2.365097 |
| 68 | 1 | 0 | 3.070311  | -4.222187 | -2.902194 |

-----

Compound 5 2-RF-CC-TS

Method: b3lyp/6-311g(d,p)

SCF Done: E(RB3LYP) = -1394.89561417 A.U. after 1 cycles

Lowest frequency = -49.6764

Zero-point correction= 0.562815  
(Hartree/Particle)  
Thermal correction to Energy= 0.594378  
Thermal correction to Enthalpy= 0.595323  
Thermal correction to Gibbs Free Energy= 0.500880  
Sum of electronic and zero-point Energies= -1394.332799  
Sum of electronic and thermal Energies= -1394.301236  
Sum of electronic and thermal Enthalpies= -1394.300292  
Sum of electronic and thermal Free Energies= -1394.394734

Standard orientation:

| Center<br>Number | Atomic<br>Number | Atomic<br>Type | Coordinates (Angstroms) |           |           |
|------------------|------------------|----------------|-------------------------|-----------|-----------|
|                  |                  |                | X                       | Y         | Z         |
| 1                | 5                | 0              | -0.498375               | -0.219301 | 0.293369  |
| 2                | 6                | 0              | 1.866458                | -5.556126 | -0.931684 |
| 3                | 1                | 0              | 2.612829                | -5.532443 | -1.729635 |
| 4                | 1                | 0              | 2.312581                | -6.046793 | -0.063266 |
| 5                | 1                | 0              | 1.040719                | -6.188573 | -1.276369 |
| 6                | 6                | 0              | 1.378019                | -4.169725 | -0.592330 |
| 7                | 6                | 0              | 1.297176                | -3.171149 | -1.557834 |
| 8                | 1                | 0              | 1.648870                | -3.380104 | -2.564484 |
| 9                | 6                | 0              | 0.331852                | -1.571553 | 0.019841  |
| 10               | 6                | 0              | 1.007872                | -3.823254 | 0.702064  |
| 11               | 1                | 0              | 1.133451                | -4.548447 | 1.502194  |
| 12               | 6                | 0              | -4.278724               | -1.222410 | 0.824674  |
| 13               | 1                | 0              | -4.913620               | -1.597015 | 1.623560  |
| 14               | 6                | 0              | -4.807882               | -1.089289 | -0.456146 |
| 15               | 6                | 0              | -3.998489               | -0.482077 | -1.409605 |
| 16               | 1                | 0              | -4.406693               | -0.270404 | -2.394631 |
| 17               | 6                | 0              | -2.097526               | -0.366023 | 0.125653  |
| 18               | 6                | 0              | -6.206145               | -1.551082 | -0.783840 |
| 19               | 1                | 0              | -6.645044               | -0.957372 | -1.589387 |
| 20               | 1                | 0              | -6.205758               | -2.596682 | -1.111524 |
| 21               | 1                | 0              | -6.864154               | -1.483295 | 0.086123  |
| 22               | 6                | 0              | -2.964692               | -0.862599 | 1.131204  |
| 23               | 6                | 0              | 0.797962                | -1.896494 | -1.280866 |
| 24               | 6                | 0              | 0.837145                | -0.908735 | -2.427317 |

|    |   |   |           |           |           |
|----|---|---|-----------|-----------|-----------|
| 25 | 1 | 0 | -0.060909 | -0.970568 | -3.046155 |
| 26 | 1 | 0 | 0.947543  | 0.121588  | -2.091135 |
| 27 | 1 | 0 | 1.690139  | -1.127794 | -3.073568 |
| 28 | 6 | 0 | -2.592228 | -0.913763 | 2.599562  |
| 29 | 1 | 0 | -3.417398 | -0.517982 | 3.198494  |
| 30 | 1 | 0 | -2.407692 | -1.931995 | 2.948062  |
| 31 | 1 | 0 | -1.714055 | -0.311669 | 2.830295  |
| 32 | 6 | 0 | -2.683023 | -0.095200 | -1.138316 |
| 33 | 6 | 0 | -2.007772 | 0.727622  | -2.217687 |
| 34 | 1 | 0 | -2.571055 | 1.654868  | -2.362159 |
| 35 | 1 | 0 | -0.989635 | 1.014987  | -1.975358 |
| 36 | 1 | 0 | -1.995160 | 0.205357  | -3.178177 |
| 37 | 6 | 0 | 0.511897  | -2.557445 | 1.021885  |
| 38 | 6 | 0 | 0.316869  | -2.289205 | 2.501148  |
| 39 | 1 | 0 | 0.121728  | -1.241770 | 2.723636  |
| 40 | 1 | 0 | -0.498894 | -2.881533 | 2.921368  |
| 41 | 1 | 0 | 1.223093  | -2.568906 | 3.047798  |
| 42 | 7 | 0 | 0.097595  | 1.083464  | 0.525383  |
| 43 | 6 | 0 | -0.693030 | 2.286214  | 0.507674  |
| 44 | 6 | 0 | 1.437998  | 1.515704  | 0.194377  |
| 45 | 6 | 0 | 0.060672  | 3.341794  | -0.034366 |
| 46 | 6 | 0 | -1.991226 | 2.508978  | 0.960090  |
| 47 | 6 | 0 | 1.393866  | 2.833831  | -0.263868 |
| 48 | 6 | 0 | 2.697964  | 0.859551  | 0.343321  |
| 49 | 6 | 0 | -0.494306 | 4.614244  | -0.185597 |
| 50 | 6 | 0 | -2.531437 | 3.785755  | 0.816435  |
| 51 | 1 | 0 | -2.576546 | 1.726982  | 1.415567  |
| 52 | 6 | 0 | 2.532107  | 3.474878  | -0.799231 |
| 53 | 6 | 0 | 3.842857  | 1.512671  | -0.236766 |
| 54 | 6 | 0 | 2.928330  | -0.313137 | 1.103589  |
| 55 | 1 | 0 | 0.090551  | 5.424599  | -0.605908 |
| 56 | 1 | 0 | -3.538726 | 3.970707  | 1.171662  |
| 57 | 6 | 0 | 3.720851  | 2.800005  | -0.830132 |
| 58 | 1 | 0 | 2.454017  | 4.485266  | -1.183769 |
| 59 | 6 | 0 | 5.112108  | 0.887716  | -0.144326 |
| 60 | 6 | 0 | 4.180543  | -0.871199 | 1.204836  |
| 61 | 1 | 0 | 2.108408  | -0.759342 | 1.635887  |
| 62 | 1 | 0 | 4.605888  | 3.258908  | -1.257044 |
| 63 | 6 | 0 | 5.282263  | -0.285893 | 0.548289  |
| 64 | 1 | 0 | 5.960245  | 1.376453  | -0.612334 |
| 65 | 1 | 0 | 4.320577  | -1.765729 | 1.800859  |
| 66 | 1 | 0 | 6.262382  | -0.743868 | 0.618107  |
| 67 | 6 | 0 | -1.800099 | 4.828179  | 0.236794  |
| 68 | 1 | 0 | -2.248348 | 5.810121  | 0.137591  |

-----

Compound 5 2-RF-CN-TS

Method: b3lyp/6-311g(d,p)

SCF Done: E(RB3LYP) = -1394.89186903 A.U. after 1 cycles

Lowest frequency = -30.0516

|                                            |              |
|--------------------------------------------|--------------|
| Zero-point correction=                     | 0.562758     |
| (Hartree/Particle)                         |              |
| Thermal correction to Energy=              | 0.594241     |
| Thermal correction to Enthalpy=            | 0.595186     |
| Thermal correction to Gibbs Free Energy=   | 0.500493     |
| Sum of electronic and zero-point Energies= | -1394.329111 |
| Sum of electronic and thermal Energies=    | -1394.297628 |
| Sum of electronic and thermal Enthalpies=  | -1394.296683 |

Sum of electronic and thermal Free Energies= -1394.391376

Standard orientation:

| Center<br>Number | Atomic<br>Number | Atomic<br>Type | Coordinates (Angstroms) |           |           |
|------------------|------------------|----------------|-------------------------|-----------|-----------|
|                  |                  |                | X                       | Y         | Z         |
| 1                | 5                | 0              | 0.703226                | 0.233994  | 0.009527  |
| 2                | 6                | 0              | 6.165990                | -2.097956 | 0.132867  |
| 3                | 1                | 0              | 6.343939                | -2.664996 | 1.048950  |
| 4                | 1                | 0              | 6.303942                | -2.784149 | -0.710208 |
| 5                | 1                | 0              | 6.932271                | -1.323778 | 0.050987  |
| 6                | 6                | 0              | 4.781142                | -1.505385 | 0.111433  |
| 7                | 6                | 0              | 3.731329                | -2.099018 | 0.805075  |
| 8                | 1                | 0              | 3.929733                | -2.995740 | 1.383187  |
| 9                | 6                | 0              | 2.131798                | -0.397687 | 0.038522  |
| 10               | 6                | 0              | 4.497871                | -0.363501 | -0.632226 |
| 11               | 1                | 0              | 5.299681                | 0.110634  | -1.189235 |
| 12               | 6                | 0              | -0.844539               | 2.808900  | -2.535220 |
| 13               | 1                | 0              | -1.285152               | 2.794721  | -3.528519 |
| 14               | 6                | 0              | -0.793326               | 4.008834  | -1.832721 |
| 15               | 6                | 0              | -0.137927               | 3.995604  | -0.605427 |
| 16               | 1                | 0              | -0.014936               | 4.927447  | -0.059725 |
| 17               | 6                | 0              | 0.261419                | 1.588072  | -0.732650 |
| 18               | 6                | 0              | -1.405248               | 5.272302  | -2.385583 |
| 19               | 1                | 0              | -2.449296               | 5.372014  | -2.068489 |
| 20               | 1                | 0              | -0.872733               | 6.160537  | -2.036811 |
| 21               | 1                | 0              | -1.395057               | 5.276559  | -3.478299 |
| 22               | 6                | 0              | -0.325664               | 1.618314  | -2.020317 |
| 23               | 6                | 0              | 2.431540                | -1.591521 | 0.787485  |
| 24               | 6                | 0              | 1.432294                | -2.400149 | 1.593385  |
| 25               | 1                | 0              | 1.036134                | -1.846544 | 2.445120  |
| 26               | 1                | 0              | 0.577910                | -2.723497 | 1.000100  |
| 27               | 1                | 0              | 1.924073                | -3.293783 | 1.982119  |
| 28               | 6                | 0              | -0.364539               | 0.413866  | -2.934646 |
| 29               | 1                | 0              | -0.235748               | 0.727409  | -3.974003 |
| 30               | 1                | 0              | 0.426098                | -0.302915 | -2.710261 |
| 31               | 1                | 0              | -1.314952               | -0.119815 | -2.871794 |
| 32               | 6                | 0              | 0.394403                | 2.827020  | -0.055610 |
| 33               | 6                | 0              | 1.166149                | 2.986879  | 1.239372  |
| 34               | 1                | 0              | 0.504591                | 3.006432  | 2.107783  |
| 35               | 1                | 0              | 1.891744                | 2.186599  | 1.394380  |
| 36               | 1                | 0              | 1.720178                | 3.929531  | 1.228164  |
| 37               | 6                | 0              | 3.221816                | 0.193970  | -0.691794 |
| 38               | 6                | 0              | 3.105962                | 1.423659  | -1.568654 |
| 39               | 1                | 0              | 2.352697                | 1.309644  | -2.347547 |
| 40               | 1                | 0              | 2.834627                | 2.315168  | -1.002751 |
| 41               | 1                | 0              | 4.064116                | 1.615891  | -2.054762 |
| 42               | 7                | 0              | -0.420638               | -0.390043 | 0.837567  |
| 43               | 6                | 0              | -0.723907               | 0.123346  | 2.111988  |
| 44               | 6                | 0              | -1.619668               | -0.924761 | 0.339469  |
| 45               | 6                | 0              | -2.116296               | 0.020358  | 2.357471  |
| 46               | 6                | 0              | 0.139147                | 0.595897  | 3.105124  |
| 47               | 6                | 0              | -2.682222               | -0.640872 | 1.211633  |
| 48               | 6                | 0              | -1.800291               | -1.825443 | -0.754190 |
| 49               | 6                | 0              | -2.647059               | 0.448234  | 3.579065  |
| 50               | 6                | 0              | -0.407730               | 1.004974  | 4.316435  |
| 51               | 1                | 0              | 1.209853                | 0.628867  | 2.952209  |
| 52               | 6                | 0              | -3.996425               | -1.067975 | 0.915201  |
| 53               | 6                | 0              | -3.145337               | -2.237931 | -1.042093 |

|    |   |   |           |           |           |
|----|---|---|-----------|-----------|-----------|
| 54 | 6 | 0 | -0.743641 | -2.413189 | -1.493011 |
| 55 | 1 | 0 | -3.711747 | 0.373138  | 3.771382  |
| 56 | 1 | 0 | 0.251663  | 1.363773  | 5.098819  |
| 57 | 6 | 0 | -4.224042 | -1.812121 | -0.211068 |
| 58 | 1 | 0 | -4.813258 | -0.809285 | 1.579849  |
| 59 | 6 | 0 | -3.364711 | -3.129541 | -2.121372 |
| 60 | 6 | 0 | -0.992382 | -3.307345 | -2.509359 |
| 61 | 1 | 0 | 0.280982  | -2.161973 | -1.248726 |
| 62 | 1 | 0 | -5.227254 | -2.139904 | -0.460441 |
| 63 | 6 | 0 | -2.317646 | -3.651976 | -2.844744 |
| 64 | 1 | 0 | -4.384958 | -3.418643 | -2.351846 |
| 65 | 1 | 0 | -0.165081 | -3.750474 | -3.052161 |
| 66 | 1 | 0 | -2.507254 | -4.345498 | -3.656212 |
| 67 | 6 | 0 | -1.790367 | 0.947598  | 4.550034  |
| 68 | 1 | 0 | -2.185816 | 1.274226  | 5.504898  |

-----

Compound 5 3-RF-TS

Method: b3lyp/6-311g(d,p)

SCF Done: E(RB3LYP) = -1394.85115264 A.U. after 1 cycles

Lowest frequency = -28.5754

Zero-point correction= 0.563071  
(Hartree/Particle)  
Thermal correction to Energy= 0.594343  
Thermal correction to Enthalpy= 0.595287  
Thermal correction to Gibbs Free Energy= 0.501102  
Sum of electronic and zero-point Energies= -1394.288082  
Sum of electronic and thermal Energies= -1394.256810  
Sum of electronic and thermal Enthalpies= -1394.255865  
Sum of electronic and thermal Free Energies= -1394.350050

Standard orientation:

| Center<br>Number | Atomic<br>Number | Atomic<br>Type | Coordinates (Angstroms) |           |           |
|------------------|------------------|----------------|-------------------------|-----------|-----------|
|                  |                  |                | X                       | Y         | Z         |
| 1                | 5                | 0              | -0.713845               | -0.149340 | 0.182642  |
| 2                | 6                | 0              | 1.928233                | -3.173645 | 4.649379  |
| 3                | 1                | 0              | 1.186088                | -3.656278 | 5.292314  |
| 4                | 1                | 0              | 2.547906                | -3.967476 | 4.219312  |
| 5                | 1                | 0              | 2.570105                | -2.555214 | 5.280072  |
| 6                | 6                | 0              | 1.267477                | -2.355885 | 3.568151  |
| 7                | 6                | 0              | 0.288173                | -2.901689 | 2.742338  |
| 8                | 1                | 0              | -0.012078               | -3.935396 | 2.887276  |
| 9                | 6                | 0              | 0.023176                | -0.807032 | 1.470883  |
| 10               | 6                | 0              | 1.598122                | -1.031928 | 3.340595  |
| 11               | 1                | 0              | 2.343647                | -0.558376 | 3.973661  |
| 12               | 6                | 0              | -3.774714               | 2.129324  | 0.834319  |
| 13               | 1                | 0              | -3.922571               | 3.035570  | 1.414273  |
| 14               | 6                | 0              | -4.811862               | 1.658346  | 0.037346  |
| 15               | 6                | 0              | -4.595990               | 0.447023  | -0.599876 |
| 16               | 1                | 0              | -5.408817               | -0.001386 | -1.164714 |
| 17               | 6                | 0              | -2.273532               | 0.285238  | 0.183530  |
| 18               | 6                | 0              | -6.108401               | 2.415045  | -0.102994 |
| 19               | 1                | 0              | -6.022203               | 3.200135  | -0.862312 |
| 20               | 1                | 0              | -6.925335               | 1.755594  | -0.404366 |
| 21               | 1                | 0              | -6.390673               | 2.900418  | 0.834835  |
| 22               | 6                | 0              | -2.548078               | 1.472534  | 0.938615  |

|    |   |   |           |           |           |
|----|---|---|-----------|-----------|-----------|
| 23 | 6 | 0 | -0.330997 | -2.170125 | 1.732486  |
| 24 | 6 | 0 | -1.372743 | -2.914925 | 0.933517  |
| 25 | 1 | 0 | -2.346629 | -2.430496 | 0.999127  |
| 26 | 1 | 0 | -1.096960 | -2.996607 | -0.120393 |
| 27 | 1 | 0 | -1.485043 | -3.932295 | 1.312196  |
| 28 | 6 | 0 | -1.572595 | 2.093367  | 1.915428  |
| 29 | 1 | 0 | -1.118277 | 1.345671  | 2.563437  |
| 30 | 1 | 0 | -0.770712 | 2.643622  | 1.420013  |
| 31 | 1 | 0 | -2.096164 | 2.808174  | 2.552752  |
| 32 | 6 | 0 | -3.383692 | -0.252430 | -0.529214 |
| 33 | 6 | 0 | -3.480822 | -1.636869 | -1.147766 |
| 34 | 1 | 0 | -3.937180 | -1.584254 | -2.140528 |
| 35 | 1 | 0 | -2.544694 | -2.165958 | -1.239001 |
| 36 | 1 | 0 | -4.144206 | -2.253851 | -0.531639 |
| 37 | 6 | 0 | 1.013818  | -0.257577 | 2.326675  |
| 38 | 6 | 0 | 1.520780  | 1.168713  | 2.314194  |
| 39 | 1 | 0 | 1.054032  | 1.802511  | 1.577176  |
| 40 | 1 | 0 | 1.357366  | 1.628282  | 3.294621  |
| 41 | 1 | 0 | 2.597060  | 1.187480  | 2.124925  |
| 42 | 7 | 0 | 0.113730  | 0.064736  | -1.089548 |
| 43 | 6 | 0 | 0.133699  | -1.024943 | -2.027268 |
| 44 | 6 | 0 | 1.483016  | 0.443492  | -1.002993 |
| 45 | 6 | 0 | 1.461564  | -1.492635 | -2.198419 |
| 46 | 6 | 0 | -0.883010 | -1.511949 | -2.839763 |
| 47 | 6 | 0 | 2.322399  | -0.531907 | -1.541140 |
| 48 | 6 | 0 | 1.977679  | 1.744748  | -0.724505 |
| 49 | 6 | 0 | 1.728931  | -2.558551 | -3.059352 |
| 50 | 6 | 0 | -0.600411 | -2.567135 | -3.707160 |
| 51 | 1 | 0 | -1.850985 | -1.039682 | -2.850742 |
| 52 | 6 | 0 | 3.724378  | -0.354426 | -1.543097 |
| 53 | 6 | 0 | 3.401308  | 1.917559  | -0.727124 |
| 54 | 6 | 0 | 1.149588  | 2.886006  | -0.572719 |
| 55 | 1 | 0 | 2.743447  | -2.919049 | -3.188320 |
| 56 | 1 | 0 | -1.386307 | -2.943988 | -4.352026 |
| 57 | 6 | 0 | 4.247990  | 0.830218  | -1.091119 |
| 58 | 1 | 0 | 4.374225  | -1.137069 | -1.918006 |
| 59 | 6 | 0 | 3.925247  | 3.202907  | -0.437953 |
| 60 | 6 | 0 | 1.695852  | 4.125454  | -0.334860 |
| 61 | 1 | 0 | 0.078155  | 2.770413  | -0.683314 |
| 62 | 1 | 0 | 5.321582  | 0.984328  | -1.078045 |
| 63 | 6 | 0 | 3.096294  | 4.281227  | -0.234197 |
| 64 | 1 | 0 | 5.002679  | 3.329226  | -0.409228 |
| 65 | 1 | 0 | 1.050399  | 4.991296  | -0.238431 |
| 66 | 1 | 0 | 3.515957  | 5.259774  | -0.030401 |
| 67 | 6 | 0 | 0.684473  | -3.113837 | -3.790639 |
| 68 | 1 | 0 | 0.877197  | -3.933857 | -4.472683 |

-----

Compound 6 GS1

Method: b3lyp/6-311g(d,p)

SCF Done: E(RB3LYP) = -1512.89656157 A.U. after 1 cycles

Lowest frequency = 18.0104

Zero-point correction= 0.646092  
(Hartree/Particle)

Thermal correction to Energy= 0.683488

Thermal correction to Enthalpy= 0.684432

Thermal correction to Gibbs Free Energy= 0.574979

Sum of electronic and zero-point Energies= -1512.250470

Sum of electronic and thermal Energies= -1512.213074  
 Sum of electronic and thermal Enthalpies= -1512.212130  
 Sum of electronic and thermal Free Energies= -1512.321583

Standard orientation:

| Center<br>Number | Atomic<br>Number | Atomic<br>Type | Coordinates (Angstroms) |           |           |
|------------------|------------------|----------------|-------------------------|-----------|-----------|
|                  |                  |                | X                       | Y         | Z         |
| 1                | 5                | 0              | 0.541046                | 0.738964  | -0.032470 |
| 2                | 6                | 0              | 0.201611                | 2.990671  | 2.005840  |
| 3                | 1                | 0              | -0.286885               | 2.106165  | 2.422935  |
| 4                | 1                | 0              | 1.276753                | 2.858480  | 2.147070  |
| 5                | 1                | 0              | -0.112954               | 3.850491  | 2.600900  |
| 6                | 6                | 0              | 3.049689                | 2.236087  | -0.989641 |
| 7                | 1                | 0              | 4.066674                | 2.501582  | -1.286016 |
| 8                | 1                | 0              | 2.576049                | 1.749071  | -1.845336 |
| 9                | 1                | 0              | 2.498906                | 3.163638  | -0.815265 |
| 10               | 6                | 0              | 0.928835                | -0.907386 | 2.507610  |
| 11               | 1                | 0              | -0.035721               | -0.409012 | 2.401757  |
| 12               | 1                | 0              | 0.829406                | -1.897623 | 2.054166  |
| 13               | 1                | 0              | 1.109086                | -1.054151 | 3.574667  |
| 14               | 6                | 0              | 5.727559                | 0.463236  | 2.848109  |
| 15               | 1                | 0              | 6.376002                | -0.298628 | 2.401333  |
| 16               | 1                | 0              | 6.265014                | 1.413920  | 2.803565  |
| 17               | 1                | 0              | 5.588001                | 0.199220  | 3.898702  |
| 18               | 6                | 0              | 4.409120                | 0.540180  | 2.118917  |
| 19               | 6                | 0              | 4.275962                | 1.291689  | 0.950941  |
| 20               | 1                | 0              | 5.133532                | 1.845405  | 0.579208  |
| 21               | 6                | 0              | 3.073998                | 1.362434  | 0.249011  |
| 22               | 6                | 0              | 1.941364                | 0.627378  | 0.693751  |
| 23               | 6                | 0              | 2.071193                | -0.126960 | 1.888375  |
| 24               | 6                | 0              | 3.288820                | -0.146943 | 2.574666  |
| 25               | 1                | 0              | 3.358328                | -0.718563 | 3.495754  |
| 26               | 6                | 0              | -0.446184               | 2.433515  | -1.742923 |
| 27               | 6                | 0              | -0.888756               | 3.712078  | -2.088016 |
| 28               | 1                | 0              | -1.171649               | 3.908071  | -3.118375 |
| 29               | 6                | 0              | -0.988610               | 4.739164  | -1.151018 |
| 30               | 6                | 0              | -0.626244               | 4.454236  | 0.165210  |
| 31               | 1                | 0              | -0.714711               | 5.232481  | 0.917930  |
| 32               | 6                | 0              | -0.151770               | 3.198128  | 0.547247  |
| 33               | 6                | 0              | -0.052559               | 2.156092  | -0.408883 |
| 34               | 6                | 0              | -0.413697               | 1.385947  | -2.838178 |
| 35               | 1                | 0              | -1.222857               | 0.660210  | -2.718525 |
| 36               | 1                | 0              | -0.531796               | 1.855295  | -3.816932 |
| 37               | 1                | 0              | 0.519332                | 0.818451  | -2.855437 |
| 38               | 6                | 0              | -1.451178               | 6.118586  | -1.551414 |
| 39               | 1                | 0              | -1.964585               | 6.621773  | -0.728655 |
| 40               | 1                | 0              | -0.601594               | 6.747863  | -1.839374 |
| 41               | 1                | 0              | -2.131865               | 6.079274  | -2.405018 |
| 42               | 7                | 0              | -0.259173               | -0.453587 | -0.321730 |
| 43               | 6                | 0              | -1.661113               | -0.520264 | -0.047605 |
| 44               | 6                | 0              | 0.164839                | -1.794408 | -0.518983 |
| 45               | 6                | 0              | -2.058336               | -1.869436 | 0.033509  |
| 46               | 6                | 0              | -2.596153               | 0.489923  | 0.194624  |
| 47               | 6                | 0              | -0.896924               | -2.669050 | -0.264271 |
| 48               | 6                | 0              | 1.399909                | -2.294914 | -1.039613 |
| 49               | 6                | 0              | -3.378926               | -2.211283 | 0.341175  |
| 50               | 6                | 0              | -3.905334               | 0.126078  | 0.489553  |
| 51               | 1                | 0              | -2.330034               | 1.534175  | 0.146528  |



|    |   |   |           |           |           |
|----|---|---|-----------|-----------|-----------|
| 52 | 6 | 0 | -0.736871 | -4.070184 | -0.343367 |
| 53 | 6 | 0 | 1.550154  | -3.724478 | -1.089118 |
| 54 | 6 | 0 | 2.444624  | -1.504505 | -1.578373 |
| 55 | 6 | 0 | -4.322926 | -1.216012 | 0.570213  |
| 56 | 1 | 0 | -3.669042 | -3.255683 | 0.399626  |
| 57 | 1 | 0 | -4.625790 | 0.918557  | 0.660854  |
| 58 | 6 | 0 | 0.476955  | -4.581787 | -0.710127 |
| 59 | 1 | 0 | -1.569023 | -4.725322 | -0.111910 |
| 60 | 6 | 0 | 2.764328  | -4.271708 | -1.573978 |
| 61 | 6 | 0 | 3.597893  | -2.070854 | -2.069590 |
| 62 | 1 | 0 | 2.333743  | -0.433430 | -1.616668 |
| 63 | 1 | 0 | 0.630855  | -5.654104 | -0.761805 |
| 64 | 6 | 0 | 3.774217  | -3.468869 | -2.046641 |
| 65 | 1 | 0 | 2.872820  | -5.351300 | -1.584928 |
| 66 | 1 | 0 | 4.373610  | -1.435212 | -2.481186 |
| 67 | 1 | 0 | 4.692153  | -3.906654 | -2.422133 |
| 68 | 6 | 0 | -5.766035 | -1.574078 | 0.896483  |
| 69 | 1 | 0 | -5.825983 | -2.668575 | 0.904065  |
| 70 | 6 | 0 | -6.181569 | -1.082115 | 2.294748  |
| 71 | 1 | 0 | -7.198963 | -1.407520 | 2.532227  |
| 72 | 1 | 0 | -5.510645 | -1.471040 | 3.064796  |
| 73 | 1 | 0 | -6.160020 | 0.010065  | 2.354376  |
| 74 | 6 | 0 | -6.742567 | -1.068516 | -0.181006 |
| 75 | 1 | 0 | -6.744853 | 0.024251  | -0.233244 |
| 76 | 1 | 0 | -6.470234 | -1.448500 | -1.168797 |
| 77 | 1 | 0 | -7.763980 | -1.392859 | 0.040183  |

-----

Compound 6 GS2

Method: b3lyp/6-311g(d,p)

SCF Done: E(RB3LYP) = -1512.89633195 A.U. after 1 cycles

Lowest frequency = 18.6608

Zero-point correction= 0.646035  
(Hartree/Particle)  
Thermal correction to Energy= 0.683459  
Thermal correction to Enthalpy= 0.684404  
Thermal correction to Gibbs Free Energy= 0.574624  
Sum of electronic and zero-point Energies= -1512.250297  
Sum of electronic and thermal Energies= -1512.212873  
Sum of electronic and thermal Enthalpies= -1512.211928  
Sum of electronic and thermal Free Energies= -1512.321708

Standard orientation:

| Center<br>Number | Atomic<br>Number | Atomic<br>Type | Coordinates (Angstroms) |           |           |
|------------------|------------------|----------------|-------------------------|-----------|-----------|
|                  |                  |                | X                       | Y         | Z         |
| 1                | 5                | 0              | 0.682680                | 0.691870  | -0.020839 |
| 2                | 6                | 0              | 0.829461                | 2.920678  | 2.064138  |
| 3                | 1                | 0              | 0.172005                | 2.145198  | 2.465633  |
| 4                | 1                | 0              | 1.855487                | 2.569010  | 2.194691  |
| 5                | 1                | 0              | 0.698556                | 3.813007  | 2.679743  |
| 6                | 6                | 0              | 3.443082                | 1.647762  | -0.978402 |
| 7                | 1                | 0              | 4.490932                | 1.697767  | -1.281916 |
| 8                | 1                | 0              | 2.870791                | 1.286969  | -1.836287 |
| 9                | 1                | 0              | 3.102189                | 2.667507  | -0.783301 |
| 10               | 6                | 0              | 0.734450                | -1.048422 | 2.486855  |
| 11               | 1                | 0              | -0.108779               | -0.363108 | 2.391277  |

|    |   |   |           |           |           |
|----|---|---|-----------|-----------|-----------|
| 12 | 1 | 0 | 0.434425  | -1.992582 | 2.023501  |
| 13 | 1 | 0 | 0.884159  | -1.241086 | 3.551353  |
| 14 | 6 | 0 | 5.714899  | -0.711809 | 2.804694  |
| 15 | 1 | 0 | 6.187943  | -1.583357 | 2.338671  |
| 16 | 1 | 0 | 6.438181  | 0.106966  | 2.771286  |
| 17 | 1 | 0 | 5.529590  | -0.960712 | 3.851895  |
| 18 | 6 | 0 | 4.437120  | -0.348741 | 2.089571  |
| 19 | 6 | 0 | 4.456597  | 0.434687  | 0.935208  |
| 20 | 1 | 0 | 5.408521  | 0.804131  | 0.564304  |
| 21 | 6 | 0 | 3.291703  | 0.766680  | 0.245910  |
| 22 | 6 | 0 | 2.033252  | 0.275987  | 0.689292  |
| 23 | 6 | 0 | 2.010213  | -0.510508 | 1.869919  |
| 24 | 6 | 0 | 3.200947  | -0.795675 | 2.544470  |
| 25 | 1 | 0 | 3.155173  | -1.385884 | 3.455277  |
| 26 | 6 | 0 | 0.066685  | 2.591571  | -1.689757 |
| 27 | 6 | 0 | -0.099430 | 3.941467  | -2.005668 |
| 28 | 1 | 0 | -0.338494 | 4.214220  | -3.029652 |
| 29 | 6 | 0 | 0.021044  | 4.946529  | -1.047405 |
| 30 | 6 | 0 | 0.319914  | 4.564069  | 0.259967  |
| 31 | 1 | 0 | 0.398613  | 5.327296  | 1.028976  |
| 32 | 6 | 0 | 0.522158  | 3.228576  | 0.612885  |
| 33 | 6 | 0 | 0.397956  | 2.209550  | -0.364696 |
| 34 | 6 | 0 | -0.125447 | 1.583749  | -2.805730 |
| 35 | 1 | 0 | -1.069847 | 1.043561  | -2.695418 |
| 36 | 1 | 0 | -0.143377 | 2.087541  | -3.774285 |
| 37 | 1 | 0 | 0.666102  | 0.831998  | -2.839984 |
| 38 | 6 | 0 | -0.143747 | 6.400425  | -1.416395 |
| 39 | 1 | 0 | -0.536623 | 6.982484  | -0.579397 |
| 40 | 1 | 0 | 0.817613  | 6.843686  | -1.699271 |
| 41 | 1 | 0 | -0.821303 | 6.522698  | -2.264631 |
| 42 | 7 | 0 | -0.351556 | -0.299819 | -0.323653 |
| 43 | 6 | 0 | -1.735536 | -0.074480 | -0.040157 |
| 44 | 6 | 0 | -0.219745 | -1.696984 | -0.543025 |
| 45 | 6 | 0 | -2.407046 | -1.313265 | 0.026760  |
| 46 | 6 | 0 | -2.436638 | 1.103633  | 0.220596  |
| 47 | 6 | 0 | -1.439218 | -2.333728 | -0.290921 |
| 48 | 6 | 0 | 0.880276  | -2.437022 | -1.080705 |
| 49 | 6 | 0 | -3.766241 | -1.379058 | 0.339422  |
| 50 | 6 | 0 | -3.793488 | 1.013972  | 0.520685  |
| 51 | 1 | 0 | -1.960017 | 2.070570  | 0.184366  |
| 52 | 6 | 0 | -1.576335 | -3.735886 | -0.389458 |
| 53 | 6 | 0 | 0.728145  | -3.865615 | -1.149549 |
| 54 | 6 | 0 | 2.063747  | -1.874571 | -1.618893 |
| 55 | 6 | 0 | -4.481318 | -0.209121 | 0.588331  |
| 56 | 1 | 0 | -4.258532 | -2.344836 | 0.384718  |
| 57 | 1 | 0 | -4.340281 | 1.932442  | 0.708767  |
| 58 | 6 | 0 | -0.498383 | -4.484928 | -0.772626 |
| 59 | 1 | 0 | -2.525853 | -4.205862 | -0.159654 |
| 60 | 6 | 0 | 1.798556  | -4.647486 | -1.651330 |
| 61 | 6 | 0 | 3.070253  | -2.662300 | -2.127180 |
| 62 | 1 | 0 | 2.178431  | -0.803495 | -1.643483 |
| 63 | 1 | 0 | -0.572544 | -5.564867 | -0.839197 |
| 64 | 6 | 0 | 2.950961  | -4.066560 | -2.122690 |
| 65 | 1 | 0 | 1.679172  | -5.725682 | -1.676580 |
| 66 | 1 | 0 | 3.959068  | -2.197027 | -2.537911 |
| 67 | 1 | 0 | 3.755091  | -4.681025 | -2.511362 |
| 68 | 6 | 0 | -5.966431 | -0.238651 | 0.923969  |
| 69 | 1 | 0 | -6.276560 | 0.801143  | 1.078364  |
| 70 | 6 | 0 | -6.808420 | -0.800772 | -0.235747 |
| 71 | 1 | 0 | -7.875612 | -0.750714 | 0.000971  |

|    |   |   |           |           |           |
|----|---|---|-----------|-----------|-----------|
| 72 | 1 | 0 | -6.636373 | -0.237997 | -1.156589 |
| 73 | 1 | 0 | -6.560682 | -1.847825 | -0.434199 |
| 74 | 6 | 0 | -6.248033 | -0.999924 | 2.231935  |
| 75 | 1 | 0 | -5.976542 | -2.056064 | 2.142738  |
| 76 | 1 | 0 | -5.677883 | -0.578821 | 3.063757  |
| 77 | 1 | 0 | -7.311023 | -0.950830 | 2.486931  |

-----

Compound 6 1-RF-C1-TSa

Method: b3lyp/6-311g(d,p)

SCF Done: E(RB3LYP) = -1512.82223343 A.U. after 1 cycles

Lowest frequency = -36.2257

Zero-point correction= 0.645504  
(Hartree/Particle)  
Thermal correction to Energy= 0.681475  
Thermal correction to Enthalpy= 0.682419  
Thermal correction to Gibbs Free Energy= 0.577778  
Sum of electronic and zero-point Energies= -1512.176729  
Sum of electronic and thermal Energies= -1512.140759  
Sum of electronic and thermal Enthalpies= -1512.139815  
Sum of electronic and thermal Free Energies= -1512.244455

Standard orientation:

| Center<br>Number | Atomic<br>Number | Atomic<br>Type | Coordinates (Angstroms) |           |           |
|------------------|------------------|----------------|-------------------------|-----------|-----------|
|                  |                  |                | X                       | Y         | Z         |
| 1                | 6                | 0              | 1.456762                | 4.891836  | 3.041951  |
| 2                | 1                | 0              | 0.716042                | 5.620153  | 3.379894  |
| 3                | 1                | 0              | 1.681869                | 4.235137  | 3.889887  |
| 4                | 1                | 0              | 2.377021                | 5.426368  | 2.793185  |
| 5                | 6                | 0              | 0.950397                | 4.088703  | 1.873480  |
| 6                | 6                | 0              | -0.406685               | 3.942080  | 1.614862  |
| 7                | 1                | 0              | -1.121134               | 4.519775  | 2.194586  |
| 8                | 6                | 0              | 0.001596                | 2.276855  | -0.152376 |
| 9                | 6                | 0              | 1.817727                | 3.536814  | 0.931156  |
| 10               | 1                | 0              | 2.869557                | 3.808957  | 0.953537  |
| 11               | 6                | 0              | -3.922708               | 0.488900  | -2.386647 |
| 12               | 1                | 0              | -4.248022               | 0.514226  | -3.423369 |
| 13               | 6                | 0              | -4.871936               | 0.311554  | -1.375214 |
| 14               | 6                | 0              | -4.418278               | 0.280679  | -0.061368 |
| 15               | 1                | 0              | -5.135498               | 0.133579  | 0.741866  |
| 16               | 6                | 0              | -2.115629               | 0.614853  | -0.755878 |
| 17               | 6                | 0              | -6.339161               | 0.178311  | -1.706410 |
| 18               | 1                | 0              | -6.909052               | -0.185141 | -0.848726 |
| 19               | 1                | 0              | -6.766382               | 1.142232  | -2.003600 |
| 20               | 1                | 0              | -6.499315               | -0.514928 | -2.537103 |
| 21               | 6                | 0              | -2.567857               | 0.639151  | -2.099387 |
| 22               | 6                | 0              | -0.897034               | 3.122434  | 0.591120  |
| 23               | 6                | 0              | -2.363061               | 3.360485  | 0.265195  |
| 24               | 1                | 0              | -2.644192               | 3.011447  | -0.722606 |
| 25               | 1                | 0              | -3.050180               | 2.919397  | 0.987930  |
| 26               | 1                | 0              | -2.522339               | 4.442836  | 0.293992  |
| 27               | 6                | 0              | -1.591107               | 0.832903  | -3.241028 |
| 28               | 1                | 0              | -2.108370               | 0.851716  | -4.202381 |
| 29               | 1                | 0              | -1.039336               | 1.773900  | -3.142557 |
| 30               | 1                | 0              | -0.851562               | 0.026219  | -3.276225 |
| 31               | 6                | 0              | -3.065066               | 0.425757  | 0.264533  |

|    |   |   |           |           |           |
|----|---|---|-----------|-----------|-----------|
| 32 | 6 | 0 | -2.693568 | 0.366146  | 1.731278  |
| 33 | 1 | 0 | -2.840915 | -0.642814 | 2.125224  |
| 34 | 1 | 0 | -1.655334 | 0.642749  | 1.915865  |
| 35 | 1 | 0 | -3.326934 | 1.036163  | 2.320991  |
| 36 | 6 | 0 | 1.368197  | 2.714489  | -0.097310 |
| 37 | 6 | 0 | 2.328035  | 2.569787  | -1.258091 |
| 38 | 1 | 0 | 3.254245  | 2.058910  | -0.996867 |
| 39 | 1 | 0 | 1.876244  | 2.073524  | -2.110223 |
| 40 | 1 | 0 | 2.591032  | 3.581759  | -1.585751 |
| 41 | 5 | 0 | -0.553596 | 0.827246  | -0.550353 |
| 42 | 7 | 0 | 0.256139  | -0.439727 | -0.559180 |
| 43 | 6 | 0 | 1.677174  | -0.517128 | -0.670586 |
| 44 | 6 | 0 | -0.046306 | -1.442795 | 0.447058  |
| 45 | 6 | 0 | 2.229729  | -1.173220 | 0.445318  |
| 46 | 6 | 0 | 2.461371  | -0.292783 | -1.794052 |
| 47 | 6 | 0 | 1.109228  | -1.714738 | 1.189860  |
| 48 | 6 | 0 | -1.191417 | -2.276908 | 0.607937  |
| 49 | 6 | 0 | 3.602022  | -1.418173 | 0.514530  |
| 50 | 6 | 0 | 3.824032  | -0.574646 | -1.729786 |
| 51 | 1 | 0 | 2.021487  | 0.062215  | -2.716954 |
| 52 | 6 | 0 | 1.076457  | -2.561839 | 2.318044  |
| 53 | 6 | 0 | -1.214014 | -3.135845 | 1.763962  |
| 54 | 6 | 0 | -2.219182 | -2.434679 | -0.357992 |
| 55 | 1 | 0 | 4.025660  | -1.921019 | 1.378117  |
| 56 | 6 | 0 | 4.421659  | -1.098412 | -0.569767 |
| 57 | 1 | 0 | 4.430387  | -0.403508 | -2.612510 |
| 58 | 6 | 0 | -0.089856 | -3.206427 | 2.633468  |
| 59 | 1 | 0 | 1.971409  | -2.708381 | 2.912245  |
| 60 | 6 | 0 | -2.333810 | -3.981969 | 1.966210  |
| 61 | 6 | 0 | -3.258273 | -3.311088 | -0.154278 |
| 62 | 1 | 0 | -2.167994 | -1.869700 | -1.275938 |
| 63 | 1 | 0 | -0.146008 | -3.852954 | 3.502414  |
| 64 | 6 | 0 | -3.340821 | -4.065549 | 1.035274  |
| 65 | 1 | 0 | -2.359439 | -4.597890 | 2.859253  |
| 66 | 1 | 0 | -4.020059 | -3.422433 | -0.917177 |
| 67 | 1 | 0 | -4.178997 | -4.734498 | 1.195570  |
| 68 | 6 | 0 | 5.916262  | -1.384778 | -0.515319 |
| 69 | 1 | 0 | 6.120486  | -1.808541 | 0.474598  |
| 70 | 6 | 0 | 6.345996  | -2.431173 | -1.559485 |
| 71 | 1 | 0 | 7.408681  | -2.668667 | -1.452121 |
| 72 | 1 | 0 | 5.776373  | -3.356910 | -1.447058 |
| 73 | 1 | 0 | 6.189707  | -2.064990 | -2.578375 |
| 74 | 6 | 0 | 6.751860  | -0.098258 | -0.644697 |
| 75 | 1 | 0 | 7.818456  | -0.317399 | -0.536710 |
| 76 | 1 | 0 | 6.606109  | 0.372053  | -1.621731 |
| 77 | 1 | 0 | 6.474903  | 0.630337  | 0.121462  |

-----

Compound 6 1-RF-C-TSa

Method: b3lyp/6-311g(d,p)

SCF Done: E(RB3LYP) = -1512.82806070 A.U. after 1 cycles

Lowest frequency = -26.8767

|                                            |              |
|--------------------------------------------|--------------|
| Zero-point correction=                     | 0.645792     |
| (Hartree/Particle)                         |              |
| Thermal correction to Energy=              | 0.681661     |
| Thermal correction to Enthalpy=            | 0.682605     |
| Thermal correction to Gibbs Free Energy=   | 0.578737     |
| Sum of electronic and zero-point Energies= | -1512.182269 |

Sum of electronic and thermal Energies= -1512.146400  
 Sum of electronic and thermal Enthalpies= -1512.145456  
 Sum of electronic and thermal Free Energies= -1512.249324

Standard orientation:

| Center<br>Number | Atomic<br>Number | Atomic<br>Type | Coordinates (Angstroms) |           |           |
|------------------|------------------|----------------|-------------------------|-----------|-----------|
|                  |                  |                | X                       | Y         | Z         |
| 1                | 5                | 0              | -0.280863               | -1.100314 | -0.334582 |
| 2                | 6                | 0              | -3.409466               | -2.520581 | 4.356202  |
| 3                | 1                | 0              | -3.089099               | -3.431558 | 4.867006  |
| 4                | 1                | 0              | -3.135104               | -1.672814 | 4.994125  |
| 5                | 1                | 0              | -4.499985               | -2.531880 | 4.284227  |
| 6                | 6                | 0              | -2.767137               | -2.391022 | 3.000291  |
| 7                | 6                | 0              | -1.582282               | -3.044241 | 2.683376  |
| 8                | 1                | 0              | -1.169639               | -3.760637 | 3.388240  |
| 9                | 6                | 0              | -1.386403               | -1.874544 | 0.529430  |
| 10               | 6                | 0              | -3.379651               | -1.690442 | 1.962003  |
| 11               | 1                | 0              | -4.403397               | -1.346241 | 2.081504  |
| 12               | 6                | 0              | 2.293474                | -2.996653 | -2.516371 |
| 13               | 1                | 0              | 2.315676                | -3.397821 | -3.526063 |
| 14               | 6                | 0              | 3.418405                | -3.134299 | -1.701513 |
| 15               | 6                | 0              | 3.352719                | -2.606272 | -0.414258 |
| 16               | 1                | 0              | 4.216304                | -2.699278 | 0.239454  |
| 17               | 6                | 0              | 1.075309                | -1.827752 | -0.758013 |
| 18               | 6                | 0              | 4.649307                | -3.859282 | -2.190680 |
| 19               | 1                | 0              | 5.539215                | -3.552454 | -1.636396 |
| 20               | 1                | 0              | 4.543430                | -4.942879 | -2.067501 |
| 21               | 1                | 0              | 4.828805                | -3.669788 | -3.252123 |
| 22               | 6                | 0              | 1.137044                | -2.357078 | -2.067783 |
| 23               | 6                | 0              | -0.920227               | -2.865328 | 1.461940  |
| 24               | 6                | 0              | 0.162156                | -3.898249 | 1.191827  |
| 25               | 1                | 0              | 0.385638                | -4.012502 | 0.136372  |
| 26               | 1                | 0              | 1.097272                | -3.701624 | 1.716986  |
| 27               | 1                | 0              | -0.211348               | -4.858628 | 1.559018  |
| 28               | 6                | 0              | -0.040125               | -2.230690 | -3.012253 |
| 29               | 1                | 0              | 0.103196                | -2.843484 | -3.904581 |
| 30               | 1                | 0              | -0.974821               | -2.546818 | -2.538553 |
| 31               | 1                | 0              | -0.173884               | -1.194863 | -3.341237 |
| 32               | 6                | 0              | 2.211267                | -1.960039 | 0.068755  |
| 33               | 6                | 0              | 2.267743                | -1.411671 | 1.480949  |
| 34               | 1                | 0              | 2.897044                | -0.519126 | 1.525298  |
| 35               | 1                | 0              | 1.285423                | -1.136718 | 1.866187  |
| 36               | 1                | 0              | 2.701894                | -2.146625 | 2.165124  |
| 37               | 6                | 0              | -2.750541               | -1.489590 | 0.737306  |
| 38               | 6                | 0              | -3.661399               | -1.122400 | -0.408775 |
| 39               | 1                | 0              | -4.217388               | -0.198020 | -0.249421 |
| 40               | 1                | 0              | -3.137037               | -1.061508 | -1.354768 |
| 41               | 1                | 0              | -4.395424               | -1.930023 | -0.509990 |
| 42               | 7                | 0              | -0.273650               | 0.367385  | -0.611060 |
| 43               | 6                | 0              | 0.925937                | 1.092997  | -0.234532 |
| 44               | 6                | 0              | -1.312569               | 1.319712  | -0.345513 |
| 45               | 6                | 0              | 0.576801                | 2.164114  | 0.615186  |
| 46               | 6                | 0              | 2.239846                | 0.957225  | -0.665276 |
| 47               | 6                | 0              | -0.868351               | 2.295052  | 0.548525  |
| 48               | 6                | 0              | -2.471424               | 1.574717  | -1.125973 |
| 49               | 6                | 0              | 1.558070                | 3.003594  | 1.142667  |
| 50               | 6                | 0              | 3.203496                | 1.824467  | -0.149824 |
| 51               | 1                | 0              | 2.518846                | 0.214747  | -1.396599 |

|    |   |   |           |          |           |
|----|---|---|-----------|----------|-----------|
| 52 | 6 | 0 | -1.736449 | 3.312723 | 1.000400  |
| 53 | 6 | 0 | -3.352901 | 2.614188 | -0.672163 |
| 54 | 6 | 0 | -2.713349 | 0.992069 | -2.397213 |
| 55 | 6 | 0 | 2.894312  | 2.831091 | 0.779269  |
| 56 | 1 | 0 | 1.278774  | 3.822253 | 1.798522  |
| 57 | 1 | 0 | 4.223829  | 1.718536 | -0.502263 |
| 58 | 6 | 0 | -2.986626 | 3.417202 | 0.444542  |
| 59 | 1 | 0 | -1.403464 | 4.022103 | 1.749561  |
| 60 | 6 | 0 | -4.522927 | 2.888690 | -1.425837 |
| 61 | 6 | 0 | -3.822928 | 1.332099 | -3.132055 |
| 62 | 1 | 0 | -1.992620 | 0.286731 | -2.791482 |
| 63 | 6 | 0 | 3.971695  | 3.752364 | 1.335083  |
| 64 | 1 | 0 | -3.674406 | 4.186264 | 0.779198  |
| 65 | 6 | 0 | -4.760799 | 2.259373 | -2.624485 |
| 66 | 1 | 0 | -5.209631 | 3.644628 | -1.058949 |
| 67 | 1 | 0 | -3.979421 | 0.890664 | -4.109932 |
| 68 | 1 | 0 | 3.471108  | 4.446811 | 2.019708  |
| 69 | 6 | 0 | 5.023186  | 2.980461 | 2.152546  |
| 70 | 6 | 0 | 4.637804  | 4.595528 | 0.232638  |
| 71 | 1 | 0 | -5.646617 | 2.500825 | -3.200886 |
| 72 | 1 | 0 | 5.749365  | 3.668231 | 2.596429  |
| 73 | 1 | 0 | 4.555073  | 2.411697 | 2.959935  |
| 74 | 1 | 0 | 5.574443  | 2.275443 | 1.523259  |
| 75 | 1 | 0 | 5.175202  | 3.963953 | -0.480838 |
| 76 | 1 | 0 | 3.895486  | 5.171274 | -0.325651 |
| 77 | 1 | 0 | 5.359021  | 5.295794 | 0.664891  |

-----

Compound 6 1-RF-N-TSa

Method: b3lyp/6-311g(d,p)

SCF Done: E(RB3LYP) = -1512.80568247 A.U. after 1 cycles

Lowest frequency = -70.7549

Zero-point correction= 0.646580  
(Hartree/Particle)  
Thermal correction to Energy= 0.681940  
Thermal correction to Enthalpy= 0.682884  
Thermal correction to Gibbs Free Energy= 0.580718  
Sum of electronic and zero-point Energies= -1512.159102  
Sum of electronic and thermal Energies= -1512.123743  
Sum of electronic and thermal Enthalpies= -1512.122799  
Sum of electronic and thermal Free Energies= -1512.224964

Standard orientation:

| Center<br>Number | Atomic<br>Number | Atomic<br>Type | Coordinates (Angstroms) |           |          |
|------------------|------------------|----------------|-------------------------|-----------|----------|
|                  |                  |                | X                       | Y         | Z        |
| 1                | 5                | 0              | 0.557408                | 1.145425  | 0.236998 |
| 2                | 6                | 0              | 5.709361                | -0.508833 | 2.253907 |
| 3                | 1                | 0              | 5.730147                | -1.347992 | 2.953389 |
| 4                | 1                | 0              | 6.093570                | -0.875057 | 1.295264 |
| 5                | 1                | 0              | 6.398803                | 0.258890  | 2.612881 |
| 6                | 6                | 0              | 4.316662                | 0.031890  | 2.080472 |
| 7                | 6                | 0              | 3.191635                | -0.778085 | 2.210581 |
| 8                | 1                | 0              | 3.307232                | -1.793555 | 2.577909 |
| 9                | 6                | 0              | 1.697955                | 0.995446  | 1.360486 |
| 10               | 6                | 0              | 4.069780                | 1.389927  | 1.891493 |
| 11               | 1                | 0              | 4.880362                | 2.100014  | 2.032719 |

|    |   |   |           |           |           |
|----|---|---|-----------|-----------|-----------|
| 12 | 6 | 0 | -1.533157 | 4.325282  | -0.668130 |
| 13 | 1 | 0 | -1.621034 | 5.370987  | -0.385618 |
| 14 | 6 | 0 | -2.562079 | 3.728780  | -1.390320 |
| 15 | 6 | 0 | -2.263909 | 2.500576  | -1.975126 |
| 16 | 1 | 0 | -2.943883 | 2.085964  | -2.713419 |
| 17 | 6 | 0 | -0.187523 | 2.260522  | -0.656917 |
| 18 | 6 | 0 | -3.878091 | 4.420547  | -1.623382 |
| 19 | 1 | 0 | -4.285374 | 4.185087  | -2.609576 |
| 20 | 1 | 0 | -4.616742 | 4.096613  | -0.881512 |
| 21 | 1 | 0 | -3.783327 | 5.505543  | -1.538453 |
| 22 | 6 | 0 | -0.336537 | 3.664117  | -0.388180 |
| 23 | 6 | 0 | 1.907729  | -0.322302 | 1.918286  |
| 24 | 6 | 0 | 0.791148  | -1.233718 | 2.391357  |
| 25 | 1 | 0 | -0.161524 | -0.720869 | 2.484284  |
| 26 | 1 | 0 | 0.651319  | -2.114755 | 1.762108  |
| 27 | 1 | 0 | 1.064917  | -1.592839 | 3.388040  |
| 28 | 6 | 0 | 0.811166  | 4.585981  | -0.050684 |
| 29 | 1 | 0 | 0.809033  | 5.384686  | -0.798781 |
| 30 | 1 | 0 | 0.728117  | 5.070969  | 0.924083  |
| 31 | 1 | 0 | 1.767145  | 4.084512  | -0.130178 |
| 32 | 6 | 0 | -1.103132 | 1.790896  | -1.674252 |
| 33 | 6 | 0 | -0.836989 | 0.613205  | -2.593366 |
| 34 | 1 | 0 | 0.213988  | 0.341762  | -2.637001 |
| 35 | 1 | 0 | -1.415420 | -0.277081 | -2.337052 |
| 36 | 1 | 0 | -1.136588 | 0.908996  | -3.603096 |
| 37 | 6 | 0 | 2.790975  | 1.887322  | 1.644762  |
| 38 | 6 | 0 | 2.616187  | 3.349747  | 1.985946  |
| 39 | 1 | 0 | 3.157804  | 4.036827  | 1.332372  |
| 40 | 1 | 0 | 1.572313  | 3.632616  | 2.032455  |
| 41 | 1 | 0 | 3.024721  | 3.487021  | 2.992154  |
| 42 | 7 | 0 | -0.045889 | -0.221376 | -0.083621 |
| 43 | 6 | 0 | -1.357491 | -0.563261 | 0.267706  |
| 44 | 6 | 0 | 0.526828  | -1.353113 | -0.672551 |
| 45 | 6 | 0 | -1.609385 | -1.912821 | -0.065566 |
| 46 | 6 | 0 | -2.335063 | 0.198834  | 0.917406  |
| 47 | 6 | 0 | -0.403324 | -2.409687 | -0.672230 |
| 48 | 6 | 0 | 1.800651  | -1.502640 | -1.307940 |
| 49 | 6 | 0 | -2.850946 | -2.490419 | 0.232845  |
| 50 | 6 | 0 | -3.555097 | -0.398585 | 1.198623  |
| 51 | 1 | 0 | -2.156896 | 1.231425  | 1.190740  |
| 52 | 6 | 0 | -0.074162 | -3.672139 | -1.216793 |
| 53 | 6 | 0 | 2.108254  | -2.798565 | -1.847171 |
| 54 | 6 | 0 | 2.749949  | -0.465172 | -1.482925 |
| 55 | 6 | 0 | -3.837512 | -1.741717 | 0.863784  |
| 56 | 1 | 0 | -3.043793 | -3.527528 | -0.024563 |
| 57 | 1 | 0 | -4.315302 | 0.194771  | 1.695255  |
| 58 | 6 | 0 | 1.160636  | -3.863303 | -1.772318 |
| 59 | 1 | 0 | -0.799772 | -4.477795 | -1.191528 |
| 60 | 6 | 0 | 3.359370  | -2.993722 | -2.482272 |
| 61 | 6 | 0 | 3.948195  | -0.687172 | -2.124113 |
| 62 | 1 | 0 | 2.538665  | 0.526627  | -1.106216 |
| 63 | 6 | 0 | -5.189787 | -2.360799 | 1.190493  |
| 64 | 1 | 0 | 1.434246  | -4.825948 | -2.190172 |
| 65 | 6 | 0 | 4.264758  | -1.967524 | -2.619360 |
| 66 | 1 | 0 | 3.587354  | -3.978818 | -2.876429 |
| 67 | 1 | 0 | 4.650218  | 0.129779  | -2.247117 |
| 68 | 1 | 0 | -5.154335 | -3.398781 | 0.839743  |
| 69 | 6 | 0 | -5.459101 | -2.398673 | 2.705838  |
| 70 | 6 | 0 | -6.341058 | -1.664089 | 0.442459  |
| 71 | 1 | 0 | 5.213434  | -2.137855 | -3.116050 |

|    |   |   |           |           |           |
|----|---|---|-----------|-----------|-----------|
| 72 | 1 | 0 | -6.404824 | -2.906598 | 2.918891  |
| 73 | 1 | 0 | -4.661320 | -2.927042 | 3.233787  |
| 74 | 1 | 0 | -5.523210 | -1.389453 | 3.123508  |
| 75 | 1 | 0 | -6.443768 | -0.620730 | 0.755537  |
| 76 | 1 | 0 | -6.170455 | -1.672420 | -0.637012 |
| 77 | 1 | 0 | -7.293024 | -2.165871 | 0.641914  |

-----

Compound 6 2-RF-CC-TSa

Method: b3lyp/6-311g(d,p)

SCF Done: E(RB3LYP) = -1512.87041146 A.U. after 1 cycles

Lowest frequency = -49.9071

Zero-point correction= 0.646505  
(Hartree/Particle)  
Thermal correction to Energy= 0.682624  
Thermal correction to Enthalpy= 0.683568  
Thermal correction to Gibbs Free Energy= 0.578617  
Sum of electronic and zero-point Energies= -1512.223906  
Sum of electronic and thermal Energies= -1512.187788  
Sum of electronic and thermal Enthalpies= -1512.186843  
Sum of electronic and thermal Free Energies= -1512.291794

Standard orientation:

| Center<br>Number | Atomic<br>Number | Atomic<br>Type | Coordinates (Angstroms) |           |           |
|------------------|------------------|----------------|-------------------------|-----------|-----------|
|                  |                  |                | X                       | Y         | Z         |
| 1                | 5                | 0              | -0.510779               | 0.646560  | 0.286343  |
| 2                | 6                | 0              | -6.231891               | 1.908438  | -0.822576 |
| 3                | 1                | 0              | -6.669166               | 1.304040  | -1.621255 |
| 4                | 1                | 0              | -6.876684               | 1.828768  | 0.055966  |
| 5                | 1                | 0              | -6.257080               | 2.952836  | -1.153113 |
| 6                | 6                | 0              | -4.820446               | 1.475048  | -0.512858 |
| 7                | 6                | 0              | -3.984617               | 0.962130  | -1.499926 |
| 8                | 1                | 0              | -4.378421               | 0.816057  | -2.502106 |
| 9                | 6                | 0              | -2.097571               | 0.771928  | 0.043378  |
| 10               | 6                | 0              | -4.301007               | 1.548045  | 0.774644  |
| 11               | 1                | 0              | -4.946661               | 1.863330  | 1.590515  |
| 12               | 6                | 0              | 0.910404                | 4.287987  | 0.842615  |
| 13               | 1                | 0              | 0.995350                | 5.010588  | 1.650249  |
| 14               | 6                | 0              | 1.309231                | 4.654596  | -0.439982 |
| 15               | 6                | 0              | 1.304929                | 3.656668  | -1.407739 |
| 16               | 1                | 0              | 1.699138                | 3.875525  | -2.396918 |
| 17               | 6                | 0              | 0.304601                | 2.030928  | 0.122252  |
| 18               | 6                | 0              | 1.756684                | 6.060443  | -0.754999 |
| 19               | 1                | 0              | 2.473640                | 6.076745  | -1.579439 |
| 20               | 1                | 0              | 0.905783                | 6.684867  | -1.049477 |
| 21               | 1                | 0              | 2.223763                | 6.535387  | 0.111468  |
| 22               | 6                | 0              | 0.430591                | 3.010607  | 1.139313  |
| 23               | 6                | 0              | -2.657567               | 0.605379  | -1.250078 |
| 24               | 6                | 0              | -1.905887               | -0.000832 | -2.416034 |
| 25               | 1                | 0              | -1.450167               | 0.765269  | -3.047553 |
| 26               | 1                | 0              | -1.123751               | -0.689693 | -2.099508 |
| 27               | 1                | 0              | -2.596728               | -0.567879 | -3.044197 |
| 28               | 6                | 0              | 0.188969                | 2.721173  | 2.607298  |
| 29               | 1                | 0              | 0.992047                | 3.163793  | 3.203292  |
| 30               | 1                | 0              | -0.747639               | 3.150841  | 2.968350  |
| 31               | 1                | 0              | 0.179801                | 1.654073  | 2.827504  |



|    |   |   |           |           |           |
|----|---|---|-----------|-----------|-----------|
| 32 | 6 | 0 | 0.845725  | 2.362407  | -1.146754 |
| 33 | 6 | 0 | 1.088731  | 1.348685  | -2.247378 |
| 34 | 1 | 0 | 2.165519  | 1.269981  | -2.426733 |
| 35 | 1 | 0 | 0.738050  | 0.350193  | -2.006395 |
| 36 | 1 | 0 | 0.626665  | 1.654379  | -3.189993 |
| 37 | 6 | 0 | -2.982266 | 1.193421  | 1.067236  |
| 38 | 6 | 0 | -2.627131 | 1.162406  | 2.540772  |
| 39 | 1 | 0 | -1.655506 | 0.713060  | 2.736932  |
| 40 | 1 | 0 | -2.635043 | 2.159643  | 2.986240  |
| 41 | 1 | 0 | -3.369382 | 0.569103  | 3.084486  |
| 42 | 7 | 0 | 0.201199  | -0.600644 | 0.489433  |
| 43 | 6 | 0 | 1.639111  | -0.661794 | 0.448974  |
| 44 | 6 | 0 | -0.234998 | -1.938138 | 0.152152  |
| 45 | 6 | 0 | 2.049125  | -1.883558 | -0.105352 |
| 46 | 6 | 0 | 2.592247  | 0.252873  | 0.890319  |
| 47 | 6 | 0 | 0.855751  | -2.668188 | -0.325368 |
| 48 | 6 | 0 | -1.501662 | -2.579496 | 0.309641  |
| 49 | 6 | 0 | 3.404201  | -2.175483 | -0.277266 |
| 50 | 6 | 0 | 3.938663  | -0.058573 | 0.723547  |
| 51 | 1 | 0 | 2.314344  | 1.184223  | 1.356464  |
| 52 | 6 | 0 | 0.705204  | -3.962138 | -0.869571 |
| 53 | 6 | 0 | -1.646398 | -3.885722 | -0.279468 |
| 54 | 6 | 0 | -2.580458 | -2.088210 | 1.085008  |
| 55 | 6 | 0 | 4.369959  | -1.258623 | 0.130314  |
| 56 | 1 | 0 | 3.706891  | -3.123984 | -0.709342 |
| 57 | 1 | 0 | 4.674151  | 0.656054  | 1.076274  |
| 58 | 6 | 0 | -0.536858 | -4.533370 | -0.890657 |
| 59 | 1 | 0 | 1.566598  | -4.485137 | -1.268770 |
| 60 | 6 | 0 | -2.893709 | -4.552192 | -0.178821 |
| 61 | 6 | 0 | -3.763634 | -2.779735 | 1.193210  |
| 62 | 1 | 0 | -2.458664 | -1.166117 | 1.622943  |
| 63 | 6 | 0 | 5.851140  | -1.564383 | -0.042880 |
| 64 | 1 | 0 | -0.685904 | -5.516345 | -1.323940 |
| 65 | 6 | 0 | -3.938633 | -4.010848 | 0.529065  |
| 66 | 1 | 0 | -2.996932 | -5.522428 | -0.653444 |
| 67 | 1 | 0 | -4.565328 | -2.375546 | 1.800656  |
| 68 | 1 | 0 | 5.916993  | -2.550303 | -0.517316 |
| 69 | 6 | 0 | 6.540216  | -0.556413 | -0.980453 |
| 70 | 6 | 0 | 6.584009  | -1.655236 | 1.307879  |
| 71 | 1 | 0 | -4.881865 | -4.539861 | 0.604716  |
| 72 | 1 | 0 | 7.586792  | -0.832062 | -1.141441 |
| 73 | 1 | 0 | 6.043829  | -0.519986 | -1.953419 |
| 74 | 1 | 0 | 6.523103  | 0.453113  | -0.559375 |
| 75 | 1 | 0 | 6.573261  | -0.694744 | 1.831391  |
| 76 | 1 | 0 | 6.116367  | -2.396091 | 1.961092  |
| 77 | 1 | 0 | 7.629795  | -1.941351 | 1.160697  |

-----

Compound 6 2-RF-CN-TSa

Method: b3lyp/6-311g(d,p)

SCF Done: E(RB3LYP) = -1512.86630674 A.U. after 1 cycles

Lowest frequency = -27.8850

|                                            |              |
|--------------------------------------------|--------------|
| Zero-point correction=                     | 0.646514     |
| (Hartree/Particle)                         |              |
| Thermal correction to Energy=              | 0.682508     |
| Thermal correction to Enthalpy=            | 0.683452     |
| Thermal correction to Gibbs Free Energy=   | 0.578471     |
| Sum of electronic and zero-point Energies= | -1512.219792 |

Sum of electronic and thermal Energies= -1512.183799  
 Sum of electronic and thermal Enthalpies= -1512.182855  
 Sum of electronic and thermal Free Energies= -1512.287836

Standard orientation:

| Center<br>Number | Atomic<br>Number | Atomic<br>Type | Coordinates (Angstroms) |           |           |
|------------------|------------------|----------------|-------------------------|-----------|-----------|
|                  |                  |                | X                       | Y         | Z         |
| 1                | 5                | 0              | 0.916303                | -0.481789 | 0.220712  |
| 2                | 6                | 0              | 4.410287                | -4.555369 | -2.328168 |
| 3                | 1                | 0              | 3.914879                | -5.043209 | -3.170303 |
| 4                | 1                | 0              | 5.322973                | -4.085846 | -2.711892 |
| 5                | 1                | 0              | 4.714615                | -5.323541 | -1.613773 |
| 6                | 6                | 0              | 3.517294                | -3.527366 | -1.683751 |
| 7                | 6                | 0              | 2.544950                | -2.855157 | -2.417635 |
| 8                | 1                | 0              | 2.425449                | -3.096880 | -3.468848 |
| 9                | 6                | 0              | 1.840042                | -1.539031 | -0.465348 |
| 10               | 6                | 0              | 3.659236                | -3.189570 | -0.341142 |
| 11               | 1                | 0              | 4.418582                | -3.693802 | 0.248005  |
| 12               | 6                | 0              | 1.422907                | 1.459768  | 3.608458  |
| 13               | 1                | 0              | 1.975640                | 2.323846  | 3.967428  |
| 14               | 6                | 0              | 0.579351                | 0.782523  | 4.483467  |
| 15               | 6                | 0              | -0.034956               | -0.370449 | 4.004486  |
| 16               | 1                | 0              | -0.644541               | -0.966018 | 4.679017  |
| 17               | 6                | 0              | 0.912437                | -0.066925 | 1.772396  |
| 18               | 6                | 0              | 0.355045                | 1.266528  | 5.894826  |
| 19               | 1                | 0              | -0.495481               | 1.955734  | 5.941126  |
| 20               | 1                | 0              | 0.139242                | 0.436994  | 6.572696  |
| 21               | 1                | 0              | 1.228077                | 1.800639  | 6.277828  |
| 22               | 6                | 0              | 1.607799                | 1.054639  | 2.284213  |
| 23               | 6                | 0              | 1.717173                | -1.880096 | -1.859861 |
| 24               | 6                | 0              | 0.739333                | -1.254473 | -2.836714 |
| 25               | 1                | 0              | -0.298996               | -1.476985 | -2.589358 |
| 26               | 1                | 0              | 0.828481                | -0.169832 | -2.883189 |
| 27               | 1                | 0              | 0.930734                | -1.647069 | -3.837137 |
| 28               | 6                | 0              | 2.628151                | 1.827315  | 1.477990  |
| 29               | 1                | 0              | 3.445324                | 2.157703  | 2.124750  |
| 30               | 1                | 0              | 3.066552                | 1.227521  | 0.679708  |
| 31               | 1                | 0              | 2.198490                | 2.718646  | 1.016588  |
| 32               | 6                | 0              | 0.123385                | -0.809008 | 2.687743  |
| 33               | 6                | 0              | -0.526664               | -2.133441 | 2.339405  |
| 34               | 1                | 0              | -1.583189               | -2.015294 | 2.090522  |
| 35               | 1                | 0              | -0.041661               | -2.627368 | 1.495654  |
| 36               | 1                | 0              | -0.464927               | -2.814061 | 3.192984  |
| 37               | 6                | 0              | 2.864701                | -2.225071 | 0.276516  |
| 38               | 6                | 0              | 3.182840                | -1.979694 | 1.736986  |
| 39               | 1                | 0              | 3.425194                | -0.936814 | 1.939384  |
| 40               | 1                | 0              | 2.352610                | -2.238473 | 2.394440  |
| 41               | 1                | 0              | 4.042033                | -2.585945 | 2.029520  |
| 42               | 7                | 0              | -0.194583               | 0.192292  | -0.583697 |
| 43               | 6                | 0              | -1.508509               | -0.310370 | -0.526245 |
| 44               | 6                | 0              | -0.318864               | 1.567461  | -0.836176 |
| 45               | 6                | 0              | -2.440124               | 0.749888  | -0.622669 |
| 46               | 6                | 0              | -1.956477               | -1.633525 | -0.482741 |
| 47               | 6                | 0              | -1.669533               | 1.950757  | -0.808546 |
| 48               | 6                | 0              | 0.684111                | 2.478666  | -1.287240 |
| 49               | 6                | 0              | -3.813766               | 0.482155  | -0.614166 |
| 50               | 6                | 0              | -3.324998               | -1.871980 | -0.487555 |
| 51               | 1                | 0              | -1.262546               | -2.463842 | -0.463886 |

|    |   |   |           |           |           |
|----|---|---|-----------|-----------|-----------|
| 52 | 6 | 0 | -2.044464 | 3.296307  | -1.024181 |
| 53 | 6 | 0 | 0.281423  | 3.842102  | -1.490010 |
| 54 | 6 | 0 | 2.003641  | 2.106571  | -1.645241 |
| 55 | 6 | 0 | -4.273231 | -0.828807 | -0.537505 |
| 56 | 1 | 0 | -4.525862 | 1.298544  | -0.686119 |
| 57 | 1 | 0 | -3.667472 | -2.900921 | -0.464096 |
| 58 | 6 | 0 | -1.081658 | 4.225268  | -1.314369 |
| 59 | 1 | 0 | -3.088100 | 3.584485  | -0.963052 |
| 60 | 6 | 0 | 1.249911  | 4.775944  | -1.934785 |
| 61 | 6 | 0 | 2.906821  | 3.034288  | -2.112211 |
| 62 | 1 | 0 | 2.306479  | 1.070451  | -1.558930 |
| 63 | 6 | 0 | -5.766446 | -1.126817 | -0.535092 |
| 64 | 1 | 0 | -1.349429 | 5.264237  | -1.472331 |
| 65 | 6 | 0 | 2.535194  | 4.388588  | -2.235989 |
| 66 | 1 | 0 | 0.947946  | 5.810459  | -2.062199 |
| 67 | 1 | 0 | 3.907255  | 2.721134  | -2.388826 |
| 68 | 1 | 0 | -6.280599 | -0.160014 | -0.584451 |
| 69 | 6 | 0 | -6.198174 | -1.938454 | -1.770036 |
| 70 | 6 | 0 | -6.215050 | -1.818217 | 0.765216  |
| 71 | 1 | 0 | 3.255828  | 5.116948  | -2.590391 |
| 72 | 1 | 0 | -7.283036 | -2.081957 | -1.778922 |
| 73 | 1 | 0 | -5.913644 | -1.429636 | -2.694402 |
| 74 | 1 | 0 | -5.732846 | -2.928653 | -1.777776 |
| 75 | 1 | 0 | -5.749512 | -2.802599 | 0.872267  |
| 76 | 1 | 0 | -5.942751 | -1.223839 | 1.640957  |
| 77 | 1 | 0 | -7.299955 | -1.961514 | 0.773393  |

-----

Compound 6 3-RF-TS

Method: b3lyp/6-311g(d,p)

SCF Done: E(RB3LYP) = -1512.82578971 A.U. after 1 cycles

Lowest frequency = -25.0527

Zero-point correction= 0.646733  
(Hartree/Particle)  
Thermal correction to Energy= 0.682553  
Thermal correction to Enthalpy= 0.683497  
Thermal correction to Gibbs Free Energy= 0.578837  
Sum of electronic and zero-point Energies= -1512.179057  
Sum of electronic and thermal Energies= -1512.143237  
Sum of electronic and thermal Enthalpies= -1512.142293  
Sum of electronic and thermal Free Energies= -1512.246952

Standard orientation:

| Center<br>Number | Atomic<br>Number | Atomic<br>Type | Coordinates (Angstroms) |           |          |
|------------------|------------------|----------------|-------------------------|-----------|----------|
|                  |                  |                | X                       | Y         | Z        |
| 1                | 5                | 0              | 0.792480                | 0.616182  | 0.248963 |
| 2                | 6                | 0              | 1.231051                | -2.076064 | 5.600938 |
| 3                | 1                | 0              | 1.491795                | -1.357939 | 6.384081 |
| 4                | 1                | 0              | 0.255886                | -2.499829 | 5.863048 |
| 5                | 1                | 0              | 1.963403                | -2.885517 | 5.627582 |
| 6                | 6                | 0              | 1.188998                | -1.417132 | 4.245037 |
| 7                | 6                | 0              | 0.452286                | -0.256158 | 4.025366 |
| 8                | 1                | 0              | -0.094708               | 0.189122  | 4.851359 |
| 9                | 6                | 0              | 1.072210                | -0.170425 | 1.641430 |
| 10               | 6                | 0              | 1.872628                | -1.928686 | 3.156493 |
| 11               | 1                | 0              | 2.476788                | -2.822615 | 3.285904 |

|    |   |   |           |           |           |
|----|---|---|-----------|-----------|-----------|
| 12 | 6 | 0 | 3.471671  | 3.142069  | -0.949220 |
| 13 | 1 | 0 | 4.529522  | 3.057044  | -1.179954 |
| 14 | 6 | 0 | 2.818695  | 4.344228  | -1.197009 |
| 15 | 6 | 0 | 1.495702  | 4.419800  | -0.792551 |
| 16 | 1 | 0 | 0.969917  | 5.365757  | -0.890272 |
| 17 | 6 | 0 | 1.426992  | 2.068009  | -0.086792 |
| 18 | 6 | 0 | 3.522881  | 5.507416  | -1.848561 |
| 19 | 1 | 0 | 3.529095  | 5.399402  | -2.938813 |
| 20 | 1 | 0 | 3.030326  | 6.454054  | -1.615447 |
| 21 | 1 | 0 | 4.564289  | 5.576237  | -1.523609 |
| 22 | 6 | 0 | 2.826874  | 2.036324  | -0.394157 |
| 23 | 6 | 0 | 0.390667  | 0.366041  | 2.781356  |
| 24 | 6 | 0 | -0.450894 | 1.617571  | 2.720072  |
| 25 | 1 | 0 | 0.138076  | 2.478600  | 2.405107  |
| 26 | 1 | 0 | -1.295842 | 1.507514  | 2.036450  |
| 27 | 1 | 0 | -0.865193 | 1.844342  | 3.703966  |
| 28 | 6 | 0 | 3.719787  | 0.843824  | -0.126695 |
| 29 | 1 | 0 | 3.560570  | 0.435325  | 0.869968  |
| 30 | 1 | 0 | 3.576589  | 0.038230  | -0.848958 |
| 31 | 1 | 0 | 4.766433  | 1.145327  | -0.196579 |
| 32 | 6 | 0 | 0.801330  | 3.339390  | -0.231412 |
| 33 | 6 | 0 | -0.563025 | 3.744938  | 0.299899  |
| 34 | 1 | 0 | -1.114141 | 4.318106  | -0.451372 |
| 35 | 1 | 0 | -1.190739 | 2.928578  | 0.622525  |
| 36 | 1 | 0 | -0.425251 | 4.409238  | 1.160177  |
| 37 | 6 | 0 | 1.830139  | -1.346984 | 1.880222  |
| 38 | 6 | 0 | 2.695855  | -2.076740 | 0.875588  |
| 39 | 1 | 0 | 2.719439  | -1.626918 | -0.104094 |
| 40 | 1 | 0 | 3.727060  | -2.124582 | 1.241000  |
| 41 | 1 | 0 | 2.349438  | -3.106022 | 0.752718  |
| 42 | 7 | 0 | -0.115259 | -0.051776 | -0.788235 |
| 43 | 6 | 0 | -1.520120 | 0.240980  | -0.680726 |
| 44 | 6 | 0 | -0.092841 | -1.464100 | -0.962565 |
| 45 | 6 | 0 | -2.248239 | -0.949200 | -0.443766 |
| 46 | 6 | 0 | -2.207083 | 1.421365  | -0.936986 |
| 47 | 6 | 0 | -1.319751 | -2.043196 | -0.636800 |
| 48 | 6 | 0 | 0.887573  | -2.206881 | -1.671567 |
| 49 | 6 | 0 | -3.636473 | -0.912148 | -0.297016 |
| 50 | 6 | 0 | -3.593622 | 1.436625  | -0.801545 |
| 51 | 1 | 0 | -1.687756 | 2.292403  | -1.300541 |
| 52 | 6 | 0 | -1.503935 | -3.441162 | -0.731265 |
| 53 | 6 | 0 | 0.694782  | -3.625070 | -1.762600 |
| 54 | 6 | 0 | 1.958207  | -1.614211 | -2.388439 |
| 55 | 6 | 0 | -4.325919 | 0.290820  | -0.443966 |
| 56 | 1 | 0 | -4.186936 | -1.828962 | -0.110319 |
| 57 | 1 | 0 | -4.119710 | 2.360719  | -1.015425 |
| 58 | 6 | 0 | -0.489842 | -4.216039 | -1.234310 |
| 59 | 1 | 0 | -2.443478 | -3.890494 | -0.429921 |
| 60 | 6 | 0 | 1.665324  | -4.394894 | -2.452304 |
| 61 | 6 | 0 | 2.856803  | -2.390923 | -3.081613 |
| 62 | 1 | 0 | 2.035204  | -0.533866 | -2.410149 |
| 63 | 6 | 0 | -5.839322 | 0.339469  | -0.285491 |
| 64 | 1 | 0 | -0.608419 | -5.291645 | -1.308988 |
| 65 | 6 | 0 | 2.728859  | -3.797776 | -3.087787 |
| 66 | 1 | 0 | 1.537485  | -5.471655 | -2.496199 |
| 67 | 1 | 0 | 3.659755  | -1.921744 | -3.639072 |
| 68 | 1 | 0 | -6.162400 | -0.676011 | -0.028964 |
| 69 | 6 | 0 | -6.264071 | 1.262262  | 0.871221  |
| 70 | 6 | 0 | -6.549661 | 0.729348  | -1.594434 |
| 71 | 1 | 0 | 3.451847  | -4.401930 | -3.623989 |

|    |   |   |           |          |           |
|----|---|---|-----------|----------|-----------|
| 72 | 1 | 0 | -7.348735 | 1.231690 | 1.012276  |
| 73 | 1 | 0 | -5.789715 | 0.962456 | 1.809041  |
| 74 | 1 | 0 | -5.983460 | 2.300944 | 0.672471  |
| 75 | 1 | 0 | -6.288281 | 1.746069 | -1.902182 |
| 76 | 1 | 0 | -6.274799 | 0.053852 | -2.408277 |
| 77 | 1 | 0 | -7.636047 | 0.690098 | -1.470000 |

-----

Compound 7 GS1

Method: b3lyp/6-311g(d,p)

SCF Done: E(RB3LYP) = -1509.47332637 A.U. after 1 cycles

Lowest frequency = 19.1800

Zero-point correction= 0.594429  
(Hartree/Particle)  
Thermal correction to Energy= 0.630056  
Thermal correction to Enthalpy= 0.631000  
Thermal correction to Gibbs Free Energy= 0.525404  
Sum of electronic and zero-point Energies= -1508.878897  
Sum of electronic and thermal Energies= -1508.843270  
Sum of electronic and thermal Enthalpies= -1508.842326  
Sum of electronic and thermal Free Energies= -1508.947922

Standard orientation:

| Center<br>Number | Atomic<br>Number | Atomic<br>Type | Coordinates (Angstroms) |           |           |
|------------------|------------------|----------------|-------------------------|-----------|-----------|
|                  |                  |                | X                       | Y         | Z         |
| 1                | 6                | 0              | -1.795978               | 2.357189  | -0.170693 |
| 2                | 6                | 0              | -0.495651               | 2.894733  | 0.144053  |
| 3                | 6                | 0              | 0.345054                | 1.819782  | 0.450611  |
| 4                | 7                | 0              | -0.349200               | 0.594885  | 0.267891  |
| 5                | 6                | 0              | -1.701342               | 0.953789  | -0.047360 |
| 6                | 6                | 0              | -2.823846               | 0.167222  | -0.293496 |
| 7                | 6                | 0              | -4.026019               | 0.787188  | -0.636561 |
| 8                | 6                | 0              | -4.117212               | 2.182777  | -0.753396 |
| 9                | 6                | 0              | -2.994000               | 2.973436  | -0.522326 |
| 10               | 6                | 0              | -0.041203               | 4.230589  | 0.195529  |
| 11               | 6                | 0              | 1.244679                | 4.481105  | 0.587140  |
| 12               | 6                | 0              | 2.097719                | 3.424941  | 1.019738  |
| 13               | 6                | 0              | 1.644733                | 2.059956  | 0.999296  |
| 14               | 8                | 0              | -5.260807               | 2.855344  | -1.088084 |
| 15               | 6                | 0              | -6.439622               | 2.106423  | -1.336789 |
| 16               | 6                | 0              | 3.388220                | 3.713154  | 1.530118  |
| 17               | 6                | 0              | 4.188230                | 2.726963  | 2.054652  |
| 18               | 6                | 0              | 3.713963                | 1.400902  | 2.106438  |
| 19               | 6                | 0              | 2.479305                | 1.080634  | 1.591619  |
| 20               | 1                | 0              | -2.792729               | -0.908108 | -0.216224 |
| 21               | 1                | 0              | -4.892016               | 0.163232  | -0.810005 |
| 22               | 1                | 0              | -3.079118               | 4.048811  | -0.619785 |
| 23               | 1                | 0              | -0.708184               | 5.040693  | -0.076548 |
| 24               | 1                | 0              | 1.624290                | 5.496507  | 0.618409  |
| 25               | 1                | 0              | -7.209583               | 2.836612  | -1.581779 |
| 26               | 1                | 0              | -6.751757               | 1.537359  | -0.453403 |
| 27               | 1                | 0              | -6.312648               | 1.420311  | -2.182281 |
| 28               | 1                | 0              | 3.726508                | 4.744073  | 1.518618  |
| 29               | 1                | 0              | 5.168707                | 2.968729  | 2.448992  |
| 30               | 1                | 0              | 4.322902                | 0.626654  | 2.559084  |
| 31               | 1                | 0              | 2.138451                | 0.060370  | 1.653078  |

|    |   |   |           |           |           |
|----|---|---|-----------|-----------|-----------|
| 32 | 5 | 0 | 0.184698  | -0.744588 | 0.025796  |
| 33 | 6 | 0 | -0.716217 | -1.994264 | 0.390236  |
| 34 | 6 | 0 | -1.003877 | -3.006236 | -0.559570 |
| 35 | 6 | 0 | -1.200837 | -2.162107 | 1.712612  |
| 36 | 6 | 0 | -1.746172 | -4.127501 | -0.183565 |
| 37 | 6 | 0 | -1.915896 | -3.312071 | 2.053067  |
| 38 | 6 | 0 | -2.206298 | -4.306696 | 1.120491  |
| 39 | 1 | 0 | -1.966454 | -4.885043 | -0.930434 |
| 40 | 1 | 0 | -2.259037 | -3.431583 | 3.076843  |
| 41 | 6 | 0 | 1.602770  | -0.956507 | -0.642945 |
| 42 | 6 | 0 | 1.936562  | -0.278492 | -1.843442 |
| 43 | 6 | 0 | 2.530447  | -1.910396 | -0.142276 |
| 44 | 6 | 0 | 3.151500  | -0.543291 | -2.482600 |
| 45 | 6 | 0 | 3.741330  | -2.123134 | -0.798472 |
| 46 | 6 | 0 | 4.076316  | -1.448644 | -1.973199 |
| 47 | 1 | 0 | 3.376668  | -0.023250 | -3.409360 |
| 48 | 1 | 0 | 4.442690  | -2.842205 | -0.384588 |
| 49 | 6 | 0 | 2.272532  | -2.724552 | 1.110134  |
| 50 | 1 | 0 | 1.892435  | -2.121750 | 1.938414  |
| 51 | 1 | 0 | 1.535039  | -3.511181 | 0.932936  |
| 52 | 1 | 0 | 3.194843  | -3.201055 | 1.449075  |
| 53 | 6 | 0 | 1.017463  | 0.719939  | -2.518706 |
| 54 | 1 | 0 | -0.037758 | 0.458974  | -2.428447 |
| 55 | 1 | 0 | 1.137047  | 1.721483  | -2.095738 |
| 56 | 1 | 0 | 1.251728  | 0.786087  | -3.583373 |
| 57 | 6 | 0 | 5.403036  | -1.682294 | -2.652380 |
| 58 | 1 | 0 | 5.365325  | -1.405568 | -3.708253 |
| 59 | 1 | 0 | 6.191716  | -1.083351 | -2.183596 |
| 60 | 1 | 0 | 5.707540  | -2.729915 | -2.584852 |
| 61 | 6 | 0 | -0.559756 | -2.905669 | -2.004461 |
| 62 | 1 | 0 | -0.825013 | -1.942134 | -2.447229 |
| 63 | 1 | 0 | 0.522604  | -3.015567 | -2.103501 |
| 64 | 1 | 0 | -1.033908 | -3.684739 | -2.605018 |
| 65 | 6 | 0 | -0.974021 | -1.131441 | 2.800771  |
| 66 | 1 | 0 | 0.060319  | -0.783626 | 2.847040  |
| 67 | 1 | 0 | -1.597989 | -0.246768 | 2.646439  |
| 68 | 1 | 0 | -1.225615 | -1.548168 | 3.778144  |
| 69 | 6 | 0 | -3.017614 | -5.520801 | 1.501749  |
| 70 | 1 | 0 | -4.088819 | -5.335894 | 1.363557  |
| 71 | 1 | 0 | -2.754332 | -6.385438 | 0.887995  |
| 72 | 1 | 0 | -2.866295 | -5.788336 | 2.550144  |

-----

Compound 7 GS2

Method: b3lyp/6-311g(d,p)

SCF Done: E(RB3LYP) = -1509.47401553 A.U. after 1 cycles

Lowest frequency = 20.0676

|                                              |              |
|----------------------------------------------|--------------|
| Zero-point correction=                       | 0.594468     |
| (Hartree/Particle)                           |              |
| Thermal correction to Energy=                | 0.630070     |
| Thermal correction to Enthalpy=              | 0.631014     |
| Thermal correction to Gibbs Free Energy=     | 0.525529     |
| Sum of electronic and zero-point Energies=   | -1508.879548 |
| Sum of electronic and thermal Energies=      | -1508.843945 |
| Sum of electronic and thermal Enthalpies=    | -1508.843001 |
| Sum of electronic and thermal Free Energies= | -1508.948487 |

Standard orientation:

| Center<br>Number | Atomic<br>Number | Atomic<br>Type | Coordinates (Angstroms) |           |           |
|------------------|------------------|----------------|-------------------------|-----------|-----------|
|                  |                  |                | X                       | Y         | Z         |
| 1                | 6                | 0              | -2.458238               | -1.587640 | 0.158915  |
| 2                | 6                | 0              | -1.403881               | -2.506575 | -0.185393 |
| 3                | 6                | 0              | -0.262563               | -1.751388 | -0.479845 |
| 4                | 7                | 0              | -0.528816               | -0.375328 | -0.264018 |
| 5                | 6                | 0              | -1.920274               | -0.291890 | 0.065559  |
| 6                | 6                | 0              | -2.730454               | 0.813335  | 0.351882  |
| 7                | 6                | 0              | -4.054605               | 0.597265  | 0.698386  |
| 8                | 6                | 0              | -4.595251               | -0.699157 | 0.784866  |
| 9                | 6                | 0              | -3.796070               | -1.804156 | 0.517834  |
| 10               | 6                | 0              | -1.401125               | -3.916513 | -0.271624 |
| 11               | 6                | 0              | -0.265797               | -4.556422 | -0.684647 |
| 12               | 6                | 0              | 0.879588                | -3.819726 | -1.104589 |
| 13               | 6                | 0              | 0.888724                | -2.382562 | -1.049289 |
| 14               | 8                | 0              | -5.914442               | -0.757340 | 1.139054  |
| 15               | 6                | 0              | -6.523896               | -2.033457 | 1.245902  |
| 16               | 6                | 0              | 2.006729                | -4.494575 | -1.636189 |
| 17               | 6                | 0              | 3.079291                | -3.805199 | -2.148459 |
| 18               | 6                | 0              | 3.055840                | -2.396363 | -2.165617 |
| 19               | 6                | 0              | 1.991374                | -1.709203 | -1.629860 |
| 20               | 1                | 0              | -2.355134               | 1.823086  | 0.298307  |
| 21               | 1                | 0              | -4.708859               | 1.433785  | 0.910908  |
| 22               | 1                | 0              | -4.181681               | -2.812734 | 0.579853  |
| 23               | 1                | 0              | -2.290298               | -4.478460 | -0.008724 |
| 24               | 1                | 0              | -0.232271               | -5.638889 | -0.742521 |
| 25               | 1                | 0              | -7.557928               | -1.848079 | 1.532717  |
| 26               | 1                | 0              | -6.040973               | -2.647983 | 2.014814  |
| 27               | 1                | 0              | -6.505251               | -2.570429 | 0.290206  |
| 28               | 1                | 0              | 1.995861                | -5.579513 | -1.651026 |
| 29               | 1                | 0              | 3.928460                | -4.339322 | -2.559419 |
| 30               | 1                | 0              | 3.879435                | -1.847678 | -2.608121 |
| 31               | 1                | 0              | 1.996342                | -0.632380 | -1.665448 |
| 32               | 5                | 0              | 0.405808                | 0.721989  | -0.008497 |
| 33               | 6                | 0              | -0.051632               | 2.197057  | -0.352330 |
| 34               | 6                | 0              | 0.004761                | 3.236765  | 0.609574  |
| 35               | 6                | 0              | -0.468851               | 2.525646  | -1.667585 |
| 36               | 6                | 0              | -0.347076               | 4.539680  | 0.252028  |
| 37               | 6                | 0              | -0.784828               | 3.846975  | -1.989608 |
| 38               | 6                | 0              | -0.737724               | 4.870959  | -1.044936 |
| 39               | 1                | 0              | -0.310738               | 5.318828  | 1.008150  |
| 40               | 1                | 0              | -1.081142               | 4.081331  | -3.008110 |
| 41               | 6                | 0              | 1.818318                | 0.459144  | 0.652787  |
| 42               | 6                | 0              | 1.921705                | -0.311421 | 1.839426  |
| 43               | 6                | 0              | 3.000417                | 1.075510  | 0.158992  |
| 44               | 6                | 0              | 3.159561                | -0.459789 | 2.472017  |
| 45               | 6                | 0              | 4.217953                | 0.878425  | 0.807794  |
| 46               | 6                | 0              | 4.323560                | 0.111633  | 1.968759  |
| 47               | 1                | 0              | 3.209940                | -1.040647 | 3.388576  |
| 48               | 1                | 0              | 5.111006                | 1.342875  | 0.399150  |
| 49               | 6                | 0              | 3.012480                | 1.951710  | -1.078035 |
| 50               | 1                | 0              | 2.453357                | 1.519476  | -1.911290 |
| 51               | 1                | 0              | 2.569767                | 2.931113  | -0.880756 |
| 52               | 1                | 0              | 4.037481                | 2.110862  | -1.419587 |
| 53               | 6                | 0              | 0.733589                | -0.975562 | 2.506391  |
| 54               | 1                | 0              | -0.180527               | -0.384297 | 2.438227  |
| 55               | 1                | 0              | 0.518623                | -1.950317 | 2.059354  |
| 56               | 1                | 0              | 0.941515                | -1.141429 | 3.565622  |

|    |   |   |           |           |           |
|----|---|---|-----------|-----------|-----------|
| 57 | 6 | 0 | 5.657490  | -0.102869 | 2.640036  |
| 58 | 1 | 0 | 5.536694  | -0.368715 | 3.692464  |
| 59 | 1 | 0 | 6.210593  | -0.916043 | 2.156979  |
| 60 | 1 | 0 | 6.281753  | 0.792607  | 2.583761  |
| 61 | 6 | 0 | 0.405281  | 2.983855  | 2.048672  |
| 62 | 1 | 0 | -0.147969 | 2.148851  | 2.486254  |
| 63 | 1 | 0 | 1.467552  | 2.744744  | 2.137235  |
| 64 | 1 | 0 | 0.206390  | 3.865850  | 2.660936  |
| 65 | 6 | 0 | -0.589242 | 1.489946  | -2.768028 |
| 66 | 1 | 0 | 0.278818  | 0.829665  | -2.826756 |
| 67 | 1 | 0 | -1.463241 | 0.850131  | -2.617877 |
| 68 | 1 | 0 | -0.698655 | 1.977554  | -3.738844 |
| 69 | 6 | 0 | -1.127215 | 6.283609  | -1.405536 |
| 70 | 1 | 0 | -2.200694 | 6.444200  | -1.255497 |
| 71 | 1 | 0 | -0.598930 | 7.013343  | -0.787473 |
| 72 | 1 | 0 | -0.908737 | 6.502402  | -2.453386 |

-----

Compound 7 1-RF-Cl-TSa

Method: b3lyp/6-311g(d,p)

SCF Done: E(RB3LYP) = -1509.40020834 A.U. after 1 cycles

Lowest frequency = -35.4088

Zero-point correction= 0.593979  
(Hartree/Particle)  
Thermal correction to Energy= 0.628091  
Thermal correction to Enthalpy= 0.629035  
Thermal correction to Gibbs Free Energy= 0.529086  
Sum of electronic and zero-point Energies= -1508.806229  
Sum of electronic and thermal Energies= -1508.772118  
Sum of electronic and thermal Enthalpies= -1508.771173  
Sum of electronic and thermal Free Energies= -1508.871122

Standard orientation:

| Center<br>Number | Atomic<br>Number | Atomic<br>Type | Coordinates (Angstroms) |           |           |
|------------------|------------------|----------------|-------------------------|-----------|-----------|
|                  |                  |                | X                       | Y         | Z         |
| 1                | 6                | 0              | -2.065917               | 4.656877  | -3.046289 |
| 2                | 1                | 0              | -1.382836               | 5.391637  | -3.478647 |
| 3                | 1                | 0              | -2.333165               | 3.950530  | -3.840418 |
| 4                | 1                | 0              | -2.982778               | 5.172025  | -2.748909 |
| 5                | 6                | 0              | -1.437287               | 3.932141  | -1.885898 |
| 6                | 6                | 0              | -0.058981               | 3.837974  | -1.737611 |
| 7                | 1                | 0              | 0.584784                | 4.403858  | -2.405172 |
| 8                | 6                | 0              | -0.262561               | 2.259276  | 0.140947  |
| 9                | 6                | 0              | -2.203708               | 3.407439  | -0.845887 |
| 10               | 1                | 0              | -3.262050               | 3.648093  | -0.791804 |
| 11               | 6                | 0              | 3.891765                | 0.698476  | 2.118968  |
| 12               | 1                | 0              | 4.302758                | 0.786665  | 3.121254  |
| 13               | 6                | 0              | 4.757076                | 0.494915  | 1.039475  |
| 14               | 6                | 0              | 4.194952                | 0.383375  | -0.227263 |
| 15               | 1                | 0              | 4.845871                | 0.214587  | -1.081106 |
| 16               | 6                | 0              | 1.949859                | 0.690225  | 0.645784  |
| 17               | 6                | 0              | 6.250588                | 0.419577  | 1.249156  |
| 18               | 1                | 0              | 6.757596                | 0.032038  | 0.363008  |
| 19               | 1                | 0              | 6.669724                | 1.408411  | 1.464793  |
| 20               | 1                | 0              | 6.502832                | -0.228356 | 2.093482  |
| 21               | 6                | 0              | 2.513364                | 0.796584  | 1.942444  |



|    |   |   |           |           |           |
|----|---|---|-----------|-----------|-----------|
| 22 | 6 | 0 | 0.542205  | 3.088592  | -0.719348 |
| 23 | 6 | 0 | 2.022054  | 3.384122  | -0.532870 |
| 24 | 1 | 0 | 2.396746  | 3.094653  | 0.443048  |
| 25 | 1 | 0 | 2.659424  | 2.925432  | -1.289496 |
| 26 | 1 | 0 | 2.143473  | 4.467547  | -0.628513 |
| 27 | 6 | 0 | 1.631175  | 1.021954  | 3.153145  |
| 28 | 1 | 0 | 2.227403  | 1.109137  | 4.063658  |
| 29 | 1 | 0 | 1.039737  | 1.938520  | 3.054601  |
| 30 | 1 | 0 | 0.926621  | 0.195708  | 3.293797  |
| 31 | 6 | 0 | 2.815092  | 0.474378  | -0.442022 |
| 32 | 6 | 0 | 2.322355  | 0.328008  | -1.866347 |
| 33 | 1 | 0 | 2.459357  | -0.697885 | -2.218129 |
| 34 | 1 | 0 | 1.266040  | 0.574814  | -1.975040 |
| 35 | 1 | 0 | 2.887609  | 0.976850  | -2.542561 |
| 36 | 6 | 0 | -1.642386 | 2.654856  | 0.181383  |
| 37 | 6 | 0 | -2.495019 | 2.546876  | 1.426460  |
| 38 | 1 | 0 | -3.423308 | 1.997062  | 1.274261  |
| 39 | 1 | 0 | -1.956322 | 2.111131  | 2.261098  |
| 40 | 1 | 0 | -2.762298 | 3.567322  | 1.722880  |
| 41 | 5 | 0 | 0.369945  | 0.849313  | 0.564599  |
| 42 | 7 | 0 | -0.396830 | -0.435144 | 0.710946  |
| 43 | 6 | 0 | -1.802268 | -0.538732 | 0.948177  |
| 44 | 6 | 0 | -0.152941 | -1.482056 | -0.262676 |
| 45 | 6 | 0 | -2.427976 | -1.272013 | -0.074447 |
| 46 | 6 | 0 | -2.493666 | -0.280645 | 2.127132  |
| 47 | 6 | 0 | -1.360674 | -1.825552 | -0.884150 |
| 48 | 6 | 0 | 0.999502  | -2.292393 | -0.484611 |
| 49 | 6 | 0 | -3.793913 | -1.568123 | -0.024145 |
| 50 | 6 | 0 | -3.843083 | -0.597826 | 2.202104  |
| 51 | 1 | 0 | -1.988048 | 0.132011  | 2.990214  |
| 52 | 6 | 0 | -1.400842 | -2.731607 | -1.965413 |
| 53 | 6 | 0 | 0.946915  | -3.211431 | -1.592370 |
| 54 | 6 | 0 | 2.113127  | -2.370619 | 0.391603  |
| 55 | 1 | 0 | -4.256392 | -2.141054 | -0.816357 |
| 56 | 6 | 0 | -4.506556 | -1.196710 | 1.116720  |
| 57 | 1 | 0 | -4.410208 | -0.414422 | 3.106181  |
| 58 | 6 | 0 | -0.247386 | -3.360116 | -2.351799 |
| 59 | 1 | 0 | -2.339368 | -2.933614 | -2.469516 |
| 60 | 6 | 0 | 2.070882  | -4.036020 | -1.851741 |
| 61 | 6 | 0 | 3.157884  | -3.227628 | 0.139622  |
| 62 | 1 | 0 | 2.125278  | -1.759555 | 1.280883  |
| 63 | 1 | 0 | -0.247823 | -4.050564 | -3.188149 |
| 64 | 6 | 0 | 3.158933  | -4.041788 | -1.012700 |
| 65 | 1 | 0 | 2.036822  | -4.698045 | -2.710874 |
| 66 | 1 | 0 | 3.987398  | -3.277026 | 0.835444  |
| 67 | 1 | 0 | 4.000713  | -4.694952 | -1.213973 |
| 68 | 8 | 0 | -5.838492 | -1.432349 | 1.307039  |
| 69 | 6 | 0 | -6.563826 | -2.077896 | 0.272142  |
| 70 | 1 | 0 | -6.188360 | -3.091079 | 0.087680  |
| 71 | 1 | 0 | -7.593523 | -2.136183 | 0.621483  |
| 72 | 1 | 0 | -6.530111 | -1.504012 | -0.661105 |

-----  
Compound 7 1-RF-C-TSa

Method: b3lyp/6-311g(d,p)

SCF Done: E(RB3LYP) = -1509.40550434 A.U. after 1 cycles

Lowest frequency = -26.9008

Zero-point correction= 0.594132  
 (Hartree/Particle)  
 Thermal correction to Energy= 0.628218  
 Thermal correction to Enthalpy= 0.629162  
 Thermal correction to Gibbs Free Energy= 0.529371  
 Sum of electronic and zero-point Energies= -1508.811373  
 Sum of electronic and thermal Energies= -1508.777286  
 Sum of electronic and thermal Enthalpies= -1508.776342  
 Sum of electronic and thermal Free Energies= -1508.876133

Standard orientation:

| Center<br>Number | Atomic<br>Number | Atomic<br>Type | Coordinates (Angstroms) |           |           |
|------------------|------------------|----------------|-------------------------|-----------|-----------|
|                  |                  |                | X                       | Y         | Z         |
| 1                | 5                | 0              | 0.352943                | -0.954553 | -0.312813 |
| 2                | 6                | 0              | -2.038845               | -3.548897 | 4.310671  |
| 3                | 1                | 0              | -1.381980               | -4.239746 | 4.844250  |
| 4                | 1                | 0              | -2.167004               | -2.663247 | 4.943259  |
| 5                | 1                | 0              | -3.020653               | -4.017959 | 4.207760  |
| 6                | 6                | 0              | -1.466963               | -3.163734 | 2.971803  |
| 7                | 6                | 0              | -0.107604               | -3.257352 | 2.699274  |
| 8                | 1                | 0              | 0.545228                | -3.731177 | 3.427041  |
| 9                | 6                | 0              | -0.352253               | -2.119505 | 0.533062  |
| 10               | 6                | 0              | -2.283199               | -2.788460 | 1.905619  |
| 11               | 1                | 0              | -3.360074               | -2.906754 | 1.990532  |
| 12               | 6                | 0              | 3.564048                | -1.597601 | -2.376786 |
| 13               | 1                | 0              | 3.790155                | -1.956767 | -3.377184 |
| 14               | 6                | 0              | 4.611664                | -1.242466 | -1.525224 |
| 15               | 6                | 0              | 4.282690                | -0.784790 | -0.251559 |
| 16               | 1                | 0              | 5.080378                | -0.499563 | 0.429635  |
| 17               | 6                | 0              | 1.903638                | -1.044253 | -0.680167 |
| 18               | 6                | 0              | 6.050319                | -1.381266 | -1.962258 |
| 19               | 1                | 0              | 6.707479                | -0.728617 | -1.383113 |
| 20               | 1                | 0              | 6.405827                | -2.408833 | -1.826952 |
| 21               | 1                | 0              | 6.172004                | -1.132876 | -3.019767 |
| 22               | 6                | 0              | 2.230364                | -1.504573 | -1.976697 |
| 23               | 6                | 0              | 0.456973                | -2.819247 | 1.494449  |
| 24               | 6                | 0              | 1.882109                | -3.300106 | 1.272662  |
| 25               | 1                | 0              | 2.166868                | -3.314464 | 0.225897  |
| 26               | 1                | 0              | 2.629516                | -2.724104 | 1.818996  |
| 27               | 1                | 0              | 1.937110                | -4.326483 | 1.647084  |
| 28               | 6                | 0              | 1.144547                | -1.892600 | -2.958649 |
| 29               | 1                | 0              | 1.565544                | -2.387066 | -3.836477 |
| 30               | 1                | 0              | 0.417584                | -2.576107 | -2.508752 |
| 31               | 1                | 0              | 0.593930                | -1.012770 | -3.307617 |
| 32               | 6                | 0              | 2.958381                | -0.679389 | 0.183337  |
| 33               | 6                | 0              | 2.727070                | -0.151493 | 1.585551  |
| 34               | 1                | 0              | 2.926529                | 0.922157  | 1.633107  |
| 35               | 1                | 0              | 1.705434                | -0.309331 | 1.932332  |
| 36               | 1                | 0              | 3.401083                | -0.635890 | 2.298210  |
| 37               | 6                | 0              | -1.757642               | -2.343658 | 0.696455  |
| 38               | 6                | 0              | -2.702397               | -2.393154 | -0.479540 |
| 39               | 1                | 0              | -3.596829               | -1.782966 | -0.350364 |
| 40               | 1                | 0              | -2.221317               | -2.123086 | -1.411830 |
| 41               | 1                | 0              | -3.031055               | -3.433148 | -0.587335 |
| 42               | 7                | 0              | -0.246084               | 0.378355  | -0.619356 |
| 43               | 6                | 0              | 0.527930                | 1.542529  | -0.219365 |
| 44               | 6                | 0              | -1.594276               | 0.809785  | -0.400563 |
| 45               | 6                | 0              | -0.263908               | 2.373648  | 0.596014  |

|    |   |   |           |           |           |
|----|---|---|-----------|-----------|-----------|
| 46 | 6 | 0 | 1.792410  | 1.970446  | -0.613375 |
| 47 | 6 | 0 | -1.628041 | 1.888382  | 0.485505  |
| 48 | 6 | 0 | -2.728715 | 0.550800  | -1.215140 |
| 49 | 6 | 0 | 0.242903  | 3.556926  | 1.142418  |
| 50 | 6 | 0 | 2.290452  | 3.158487  | -0.090374 |
| 51 | 1 | 0 | 2.380631  | 1.412181  | -1.324784 |
| 52 | 6 | 0 | -2.856347 | 2.452491  | 0.893740  |
| 53 | 6 | 0 | -3.978103 | 1.129231  | -0.805602 |
| 54 | 6 | 0 | -2.663650 | -0.087983 | -2.480745 |
| 55 | 6 | 0 | 1.543550  | 3.934172  | 0.810656  |
| 56 | 1 | 0 | -0.387890 | 4.181236  | 1.760646  |
| 57 | 1 | 0 | 3.266028  | 3.523103  | -0.387483 |
| 58 | 6 | 0 | -4.017250 | 2.020297  | 0.303790  |
| 59 | 1 | 0 | -2.875493 | 3.240984  | 1.637734  |
| 60 | 6 | 0 | -5.130777 | 0.883505  | -1.594993 |
| 61 | 6 | 0 | -3.789441 | -0.248818 | -3.251172 |
| 62 | 1 | 0 | -1.701512 | -0.428976 | -2.841877 |
| 63 | 1 | 0 | -4.973931 | 2.433194  | 0.605041  |
| 64 | 6 | 0 | -5.044942 | 0.204030  | -2.786828 |
| 65 | 1 | 0 | -6.082100 | 1.285156  | -1.261401 |
| 66 | 1 | 0 | -3.715336 | -0.721720 | -4.224034 |
| 67 | 1 | 0 | -5.931497 | 0.048553  | -3.391035 |
| 68 | 8 | 0 | 2.163442  | 5.064537  | 1.265567  |
| 69 | 6 | 0 | 1.453116  | 5.908008  | 2.157634  |
| 70 | 1 | 0 | 2.133460  | 6.721482  | 2.405104  |
| 71 | 1 | 0 | 0.551863  | 6.322418  | 1.690663  |
| 72 | 1 | 0 | 1.173499  | 5.378818  | 3.076122  |

-----

Compound 7 1-RF-C-TSb

Method: b3lyp/6-311g(d,p)

SCF Done: E(RB3LYP) = -1509.40531075 A.U. after 1 cycles

Lowest frequency = -26.7899

Zero-point correction= 0.594108  
(Hartree/Particle)  
Thermal correction to Energy= 0.628207  
Thermal correction to Enthalpy= 0.629151  
Thermal correction to Gibbs Free Energy= 0.529346  
Sum of electronic and zero-point Energies= -1508.811203  
Sum of electronic and thermal Energies= -1508.777104  
Sum of electronic and thermal Enthalpies= -1508.776160  
Sum of electronic and thermal Free Energies= -1508.875965

Standard orientation:

| Center<br>Number | Atomic<br>Number | Atomic<br>Type | Coordinates (Angstroms) |           |           |
|------------------|------------------|----------------|-------------------------|-----------|-----------|
|                  |                  |                | X                       | Y         | Z         |
| 1                | 5                | 0              | -0.141450               | -0.949416 | 0.358709  |
| 2                | 6                | 0              | 2.604006                | -3.579580 | -4.043693 |
| 3                | 1                | 0              | 2.060182                | -4.411701 | -4.496788 |
| 4                | 1                | 0              | 2.590726                | -2.750150 | -4.759785 |
| 5                | 1                | 0              | 3.647076                | -3.879620 | -3.915155 |
| 6                | 6                | 0              | 1.984466                | -3.159372 | -2.736982 |
| 7                | 6                | 0              | 0.656625                | -3.433076 | -2.431956 |
| 8                | 1                | 0              | 0.081995                | -4.068638 | -3.099933 |
| 9                | 6                | 0              | 0.730945                | -2.068818 | -0.387063 |
| 10               | 6                | 0              | 2.736683                | -2.562397 | -1.726462 |

|    |   |   |           |           |           |
|----|---|---|-----------|-----------|-----------|
| 11 | 1 | 0 | 3.818538  | -2.521117 | -1.820007 |
| 12 | 6 | 0 | -3.236221 | -1.870439 | 2.496579  |
| 13 | 1 | 0 | -3.413729 | -2.167248 | 3.526802  |
| 14 | 6 | 0 | -4.318808 | -1.752866 | 1.623107  |
| 15 | 6 | 0 | -4.052132 | -1.369056 | 0.310944  |
| 16 | 1 | 0 | -4.878353 | -1.269571 | -0.388577 |
| 17 | 6 | 0 | -1.663845 | -1.234972 | 0.745718  |
| 18 | 6 | 0 | -5.723964 | -2.063996 | 2.080165  |
| 19 | 1 | 0 | -6.467053 | -1.579411 | 1.442730  |
| 20 | 1 | 0 | -5.918576 | -3.141838 | 2.049911  |
| 21 | 1 | 0 | -5.891900 | -1.733388 | 3.108496  |
| 22 | 6 | 0 | -1.928021 | -1.618565 | 2.080732  |
| 23 | 6 | 0 | 0.035345  | -2.972025 | -1.264337 |
| 24 | 6 | 0 | -1.300388 | -3.638347 | -0.975247 |
| 25 | 1 | 0 | -1.575048 | -3.600714 | 0.073758  |
| 26 | 1 | 0 | -2.128559 | -3.231346 | -1.556174 |
| 27 | 1 | 0 | -1.202810 | -4.690940 | -1.256576 |
| 28 | 6 | 0 | -0.803393 | -1.752187 | 3.086256  |
| 29 | 1 | 0 | -1.153128 | -2.219795 | 4.008953  |
| 30 | 1 | 0 | 0.018205  | -2.360758 | 2.695579  |
| 31 | 1 | 0 | -0.388954 | -0.773169 | 3.348494  |
| 32 | 6 | 0 | -2.754825 | -1.109015 | -0.140196 |
| 33 | 6 | 0 | -2.592433 | -0.681507 | -1.585505 |
| 34 | 1 | 0 | -2.932402 | 0.347876  | -1.726277 |
| 35 | 1 | 0 | -1.557910 | -0.731580 | -1.926181 |
| 36 | 1 | 0 | -3.193214 | -1.312962 | -2.246698 |
| 37 | 6 | 0 | 2.153416  | -2.089545 | -0.554872 |
| 38 | 6 | 0 | 3.100019  | -1.879007 | 0.601641  |
| 39 | 1 | 0 | 3.884191  | -1.148572 | 0.400238  |
| 40 | 1 | 0 | 2.586271  | -1.603960 | 1.514774  |
| 41 | 1 | 0 | 3.592100  | -2.838677 | 0.796637  |
| 42 | 7 | 0 | 0.247728  | 0.478488  | 0.541263  |
| 43 | 6 | 0 | -0.692872 | 1.476996  | 0.056280  |
| 44 | 6 | 0 | 1.516104  | 1.091189  | 0.273090  |
| 45 | 6 | 0 | -0.030719 | 2.341646  | -0.846979 |
| 46 | 6 | 0 | -1.999768 | 1.745005  | 0.424777  |
| 47 | 6 | 0 | 1.391556  | 2.076206  | -0.707656 |
| 48 | 6 | 0 | 2.672045  | 1.081870  | 1.098316  |
| 49 | 6 | 0 | -0.710825 | 3.371307  | -1.483847 |
| 50 | 6 | 0 | -2.682489 | 2.796927  | -0.198917 |
| 51 | 1 | 0 | -2.499461 | 1.171021  | 1.189474  |
| 52 | 6 | 0 | 2.520562  | 2.783002  | -1.174409 |
| 53 | 6 | 0 | 3.820533  | 1.805715  | 0.628893  |
| 54 | 6 | 0 | 2.699219  | 0.552070  | 2.414609  |
| 55 | 6 | 0 | -2.057344 | 3.584070  | -1.173525 |
| 56 | 1 | 0 | -0.218450 | 4.048895  | -2.170638 |
| 57 | 1 | 0 | -3.699946 | 3.000470  | 0.105502  |
| 58 | 6 | 0 | 3.730112  | 2.588800  | -0.556177 |
| 59 | 1 | 0 | 2.421348  | 3.495609  | -1.985342 |
| 60 | 6 | 0 | 4.992929  | 1.809489  | 1.427693  |
| 61 | 6 | 0 | 3.832209  | 0.633289  | 3.186849  |
| 62 | 1 | 0 | 1.799275  | 0.098929  | 2.811105  |
| 63 | 1 | 0 | 4.614017  | 3.115000  | -0.900032 |
| 64 | 6 | 0 | 5.005645  | 1.231717  | 2.674767  |
| 65 | 1 | 0 | 5.873432  | 2.320876  | 1.052504  |
| 66 | 1 | 0 | 3.826820  | 0.240290  | 4.197348  |
| 67 | 1 | 0 | 5.902347  | 1.267094  | 3.282974  |
| 68 | 8 | 0 | -2.660174 | 4.616343  | -1.837903 |
| 69 | 6 | 0 | -4.010733 | 4.922227  | -1.529521 |
| 70 | 1 | 0 | -4.281618 | 5.756929  | -2.174376 |

|    |   |   |           |          |           |
|----|---|---|-----------|----------|-----------|
| 71 | 1 | 0 | -4.674487 | 4.075118 | -1.738187 |
| 72 | 1 | 0 | -4.128218 | 5.223446 | -0.482153 |

-----

Compound 7 1-RF-N-TSa

Method: b3lyp/6-311g(d,p)

SCF Done: E(RB3LYP) = -1509.38285669 A.U. after 1 cycles

Lowest frequency = -70.3696

|                                              |              |
|----------------------------------------------|--------------|
| Zero-point correction=                       | 0.594996     |
| (Hartree/Particle)                           |              |
| Thermal correction to Energy=                | 0.628534     |
| Thermal correction to Enthalpy=              | 0.629478     |
| Thermal correction to Gibbs Free Energy=     | 0.531635     |
| Sum of electronic and zero-point Energies=   | -1508.787860 |
| Sum of electronic and thermal Energies=      | -1508.754323 |
| Sum of electronic and thermal Enthalpies=    | -1508.753379 |
| Sum of electronic and thermal Free Energies= | -1508.851222 |

Standard orientation:

| Center<br>Number | Atomic<br>Number | Atomic<br>Type | Coordinates (Angstroms) |           |           |
|------------------|------------------|----------------|-------------------------|-----------|-----------|
|                  |                  |                | X                       | Y         | Z         |
| 1                | 5                | 0              | -0.312675               | 1.162747  | -0.230518 |
| 2                | 6                | 0              | -5.689032               | -0.096555 | -1.927210 |
| 3                | 1                | 0              | -5.811052               | -0.896934 | -2.660993 |
| 4                | 1                | 0              | -6.024841               | -0.487971 | -0.960377 |
| 5                | 1                | 0              | -6.354612               | 0.726397  | -2.198022 |
| 6                | 6                | 0              | -4.257158               | 0.354238  | -1.833834 |
| 7                | 6                | 0              | -3.195731               | -0.512200 | -2.081369 |
| 8                | 1                | 0              | -3.399000               | -1.500803 | -2.482423 |
| 9                | 6                | 0              | -1.539921               | 1.129944  | -1.268765 |
| 10               | 6                | 0              | -3.915243               | 1.685286  | -1.605078 |
| 11               | 1                | 0              | -4.689045               | 2.446836  | -1.654976 |
| 12               | 6                | 0              | 2.025266                | 4.173397  | 0.646761  |
| 13               | 1                | 0              | 2.155255                | 5.224432  | 0.402889  |
| 14               | 6                | 0              | 3.067150                | 3.485585  | 1.261125  |
| 15               | 6                | 0              | 2.739101                | 2.250693  | 1.815330  |
| 16               | 1                | 0              | 3.445608                | 1.763818  | 2.481029  |
| 17               | 6                | 0              | 0.560229                | 2.191748  | 0.650883  |
| 18               | 6                | 0              | 4.436949                | 4.088125  | 1.419763  |
| 19               | 1                | 0              | 4.898715                | 3.790343  | 2.364257  |
| 20               | 1                | 0              | 5.098569                | 3.749547  | 0.614479  |
| 21               | 1                | 0              | 4.404128                | 5.179310  | 1.379661  |
| 22               | 6                | 0              | 0.773051                | 3.595821  | 0.432255  |
| 23               | 6                | 0              | -1.868718               | -0.145697 | -1.865638 |
| 24               | 6                | 0              | -0.846806               | -1.097136 | -2.458684 |
| 25               | 1                | 0              | 0.126265                | -0.636598 | -2.600707 |
| 26               | 1                | 0              | -0.715637               | -2.012564 | -1.878568 |
| 27               | 1                | 0              | -1.213021               | -1.393581 | -3.446247 |
| 28               | 6                | 0              | -0.339056               | 4.596877  | 0.226133  |
| 29               | 1                | 0              | -0.233450               | 5.355374  | 1.007901  |
| 30               | 1                | 0              | -0.299011               | 5.124991  | -0.728746 |
| 31               | 1                | 0              | -1.315114               | 4.147126  | 0.355595  |
| 32               | 6                | 0              | 1.518331                | 1.623667  | 1.574652  |
| 33               | 6                | 0              | 1.248707                | 0.421777  | 2.460708  |
| 34               | 1                | 0              | 0.188892                | 0.210977  | 2.573174  |
| 35               | 1                | 0              | 1.749986                | -0.487873 | 2.122844  |

|    |   |   |           |           |           |
|----|---|---|-----------|-----------|-----------|
| 36 | 1 | 0 | 1.640125  | 0.651691  | 3.456081  |
| 37 | 6 | 0 | -2.594115 | 2.095637  | -1.432425 |
| 38 | 6 | 0 | -2.354472 | 3.559856  | -1.722044 |
| 39 | 1 | 0 | -2.806851 | 4.245349  | -1.002288 |
| 40 | 1 | 0 | -1.300976 | 3.783667  | -1.830990 |
| 41 | 1 | 0 | -2.822227 | 3.767885  | -2.689605 |
| 42 | 7 | 0 | 0.233552  | -0.247693 | -0.017889 |
| 43 | 6 | 0 | 1.498338  | -0.640156 | -0.481251 |
| 44 | 6 | 0 | -0.353827 | -1.374174 | 0.559718  |
| 45 | 6 | 0 | 1.699665  | -2.012891 | -0.229447 |
| 46 | 6 | 0 | 2.466464  | 0.102180  | -1.170583 |
| 47 | 6 | 0 | 0.516568  | -2.476113 | 0.442439  |
| 48 | 6 | 0 | -1.584561 | -1.491427 | 1.282107  |
| 49 | 6 | 0 | 2.880746  | -2.654790 | -0.640986 |
| 50 | 6 | 0 | 3.626218  | -0.536519 | -1.570433 |
| 51 | 1 | 0 | 2.326732  | 1.154291  | -1.384640 |
| 52 | 6 | 0 | 0.159439  | -3.745566 | 0.952668  |
| 53 | 6 | 0 | -1.921442 | -2.795101 | 1.783409  |
| 54 | 6 | 0 | -2.461169 | -0.417546 | 1.575100  |
| 55 | 6 | 0 | 3.841188  | -1.906724 | -1.308115 |
| 56 | 1 | 0 | 3.021902  | -3.708400 | -0.440450 |
| 57 | 1 | 0 | 4.402715  | 0.003139  | -2.098577 |
| 58 | 6 | 0 | -1.040222 | -3.901655 | 1.589513  |
| 59 | 1 | 0 | 0.836315  | -4.585220 | 0.837083  |
| 60 | 6 | 0 | -3.131585 | -2.958132 | 2.501093  |
| 61 | 6 | 0 | -3.619991 | -0.610130 | 2.293997  |
| 62 | 1 | 0 | -2.224569 | 0.579640  | 1.228910  |
| 63 | 1 | 0 | -1.334404 | -4.868658 | 1.982579  |
| 64 | 6 | 0 | -3.968172 | -1.895594 | 2.752725  |
| 65 | 1 | 0 | -3.383039 | -3.948753 | 2.866102  |
| 66 | 1 | 0 | -4.265959 | 0.234204  | 2.506597  |
| 67 | 1 | 0 | -4.885920 | -2.042410 | 3.311199  |
| 68 | 8 | 0 | 5.036732  | -2.397757 | -1.763820 |
| 69 | 6 | 0 | 5.320221  | -3.769061 | -1.547846 |
| 70 | 1 | 0 | 4.586503  | -4.416340 | -2.043241 |
| 71 | 1 | 0 | 6.303485  | -3.944439 | -1.982315 |
| 72 | 1 | 0 | 5.349729  | -4.012292 | -0.478863 |

-----

Compound 7 1-RF-N-TSb

Method: b3lyp/6-311g(d,p)

SCF Done: E(RB3LYP) = -1509.38164857 A.U. after 1 cycles

Lowest frequency = -70.7339

Zero-point correction= 0.594868  
(Hartree/Particle)  
Thermal correction to Energy= 0.628463  
Thermal correction to Enthalpy= 0.629408  
Thermal correction to Gibbs Free Energy= 0.531265  
Sum of electronic and zero-point Energies= -1508.786780  
Sum of electronic and thermal Energies= -1508.753185  
Sum of electronic and thermal Enthalpies= -1508.752241  
Sum of electronic and thermal Free Energies= -1508.850384

Standard orientation:

-----

| Center<br>Number | Atomic<br>Number | Atomic<br>Type | Coordinates (Angstroms) |   |   |
|------------------|------------------|----------------|-------------------------|---|---|
|                  |                  |                | X                       | Y | Z |

-----

|    |   |   |           |           |           |
|----|---|---|-----------|-----------|-----------|
| 1  | 5 | 0 | -0.215790 | 1.126576  | -0.208612 |
| 2  | 6 | 0 | -5.636317 | 0.417163  | -2.062928 |
| 3  | 1 | 0 | -5.817553 | -0.370319 | -2.798387 |
| 4  | 1 | 0 | -6.036627 | 0.065968  | -1.105245 |
| 5  | 1 | 0 | -6.208024 | 1.301558  | -2.353830 |
| 6  | 6 | 0 | -4.169612 | 0.722255  | -1.929655 |
| 7  | 6 | 0 | -3.193826 | -0.245790 | -2.151155 |
| 8  | 1 | 0 | -3.483486 | -1.208986 | -2.560823 |
| 9  | 6 | 0 | -1.405766 | 1.221498  | -1.285844 |
| 10 | 6 | 0 | -3.702580 | 2.012675  | -1.688055 |
| 11 | 1 | 0 | -4.394368 | 2.847931  | -1.758852 |
| 12 | 6 | 0 | 2.372874  | 3.891639  | 0.781422  |
| 13 | 1 | 0 | 2.613405  | 4.926131  | 0.551102  |
| 14 | 6 | 0 | 3.316540  | 3.104619  | 1.433935  |
| 15 | 6 | 0 | 2.848799  | 1.904023  | 1.962191  |
| 16 | 1 | 0 | 3.476731  | 1.348048  | 2.652108  |
| 17 | 6 | 0 | 0.723753  | 2.061110  | 0.710575  |
| 18 | 6 | 0 | 4.729091  | 3.573601  | 1.657359  |
| 19 | 1 | 0 | 5.120489  | 3.223742  | 2.615665  |
| 20 | 1 | 0 | 5.390140  | 3.183606  | 0.875105  |
| 21 | 1 | 0 | 4.800248  | 4.663428  | 1.632139  |
| 22 | 6 | 0 | 1.081214  | 3.437954  | 0.509953  |
| 23 | 6 | 0 | -1.843312 | -0.013755 | -1.897311 |
| 24 | 6 | 0 | -0.904680 | -1.060509 | -2.466643 |
| 25 | 1 | 0 | 0.116543  | -0.704673 | -2.563954 |
| 26 | 1 | 0 | -0.894870 | -1.992158 | -1.897693 |
| 27 | 1 | 0 | -1.261367 | -1.303763 | -3.472177 |
| 28 | 6 | 0 | 0.081933  | 4.542235  | 0.259395  |
| 29 | 1 | 0 | 0.229526  | 5.290558  | 1.044102  |
| 30 | 1 | 0 | 0.211461  | 5.059364  | -0.693540 |
| 31 | 1 | 0 | -0.937708 | 4.190207  | 0.349411  |
| 32 | 6 | 0 | 1.584350  | 1.398426  | 1.666442  |
| 33 | 6 | 0 | 1.167067  | 0.222282  | 2.529558  |
| 34 | 1 | 0 | 0.088514  | 0.113999  | 2.601617  |
| 35 | 1 | 0 | 1.590409  | -0.729265 | 2.200625  |
| 36 | 1 | 0 | 1.541818  | 0.405904  | 3.540812  |
| 37 | 6 | 0 | -2.352463 | 2.288602  | -1.477889 |
| 38 | 6 | 0 | -1.957918 | 3.720017  | -1.763537 |
| 39 | 1 | 0 | -2.361813 | 4.452041  | -1.060966 |
| 40 | 1 | 0 | -0.884369 | 3.836819  | -1.839633 |
| 41 | 1 | 0 | -2.371733 | 3.967474  | -2.746303 |
| 42 | 7 | 0 | 0.180964  | -0.330825 | 0.011341  |
| 43 | 6 | 0 | 1.417035  | -0.843972 | -0.414267 |
| 44 | 6 | 0 | -0.534666 | -1.398012 | 0.558560  |
| 45 | 6 | 0 | 1.469768  | -2.237181 | -0.168647 |
| 46 | 6 | 0 | 2.474813  | -0.203424 | -1.058231 |
| 47 | 6 | 0 | 0.221773  | -2.581329 | 0.459755  |
| 48 | 6 | 0 | -1.794528 | -1.395329 | 1.239130  |
| 49 | 6 | 0 | 2.589494  | -2.981240 | -0.545103 |
| 50 | 6 | 0 | 3.588994  | -0.952465 | -1.428476 |
| 51 | 1 | 0 | 2.450835  | 0.858800  | -1.266422 |
| 52 | 6 | 0 | -0.276956 | -3.811559 | 0.944462  |
| 53 | 6 | 0 | -2.277859 | -2.661787 | 1.715782  |
| 54 | 6 | 0 | -2.566914 | -0.239861 | 1.514962  |
| 55 | 6 | 0 | 3.650488  | -2.335161 | -1.171890 |
| 56 | 1 | 0 | 2.656602  | -4.048131 | -0.369215 |
| 57 | 1 | 0 | 4.410665  | -0.449402 | -1.919642 |
| 58 | 6 | 0 | -1.507402 | -3.850411 | 1.539836  |
| 59 | 1 | 0 | 0.317154  | -4.713033 | 0.841782  |
| 60 | 6 | 0 | -3.521944 | -2.705823 | 2.391971  |

|    |   |   |           |           |           |
|----|---|---|-----------|-----------|-----------|
| 61 | 6 | 0 | -3.762371 | -0.318588 | 2.193922  |
| 62 | 1 | 0 | -2.218843 | 0.730659  | 1.187494  |
| 63 | 1 | 0 | -1.910543 | -4.785412 | 1.913013  |
| 64 | 6 | 0 | -4.254176 | -1.565593 | 2.627256  |
| 65 | 1 | 0 | -3.884600 | -3.668258 | 2.738257  |
| 66 | 1 | 0 | -4.326062 | 0.585435  | 2.394757  |
| 67 | 1 | 0 | -5.200245 | -1.622323 | 3.154019  |
| 68 | 8 | 0 | 4.716283  | -3.130596 | -1.509820 |
| 69 | 6 | 0 | 5.825375  | -2.536596 | -2.161184 |
| 70 | 1 | 0 | 6.297661  | -1.766263 | -1.539706 |
| 71 | 1 | 0 | 6.537949  | -3.342712 | -2.331478 |
| 72 | 1 | 0 | 5.543587  | -2.097596 | -3.125804 |

-----

Compound 7 2-RF-CC-TSa

Method: b3lyp/6-311g(d,p)

SCF Done: E(RB3LYP) = -1509.44811874 A.U. after 1 cycles

Lowest frequency = -50.1610

Zero-point correction= 0.594900  
(Hartree/Particle)  
Thermal correction to Energy= 0.629208  
Thermal correction to Enthalpy= 0.630152  
Thermal correction to Gibbs Free Energy= 0.529472  
Sum of electronic and zero-point Energies= -1508.853219  
Sum of electronic and thermal Energies= -1508.818911  
Sum of electronic and thermal Enthalpies= -1508.817967  
Sum of electronic and thermal Free Energies= -1508.918647

Standard orientation:

| Center<br>Number | Atomic<br>Number | Atomic<br>Type | Coordinates (Angstroms) |           |           |
|------------------|------------------|----------------|-------------------------|-----------|-----------|
|                  |                  |                | X                       | Y         | Z         |
| 1                | 5                | 0              | -0.329659               | 0.655111  | 0.295473  |
| 2                | 6                | 0              | -6.075651               | 1.613968  | -0.980812 |
| 3                | 1                | 0              | -6.461516               | 0.974340  | -1.778558 |
| 4                | 1                | 0              | -6.738406               | 1.517836  | -0.117404 |
| 5                | 1                | 0              | -6.143923               | 2.649751  | -1.331747 |
| 6                | 6                | 0              | -4.653025               | 1.257203  | -0.627500 |
| 7                | 6                | 0              | -3.767250               | 0.769722  | -1.583379 |
| 8                | 1                | 0              | -4.126868               | 0.587115  | -2.592401 |
| 9                | 6                | 0              | -1.914096               | 0.700057  | 0.010653  |
| 10               | 6                | 0              | -4.171559               | 1.378724  | 0.671034  |
| 11               | 1                | 0              | -4.853003               | 1.676126  | 1.464200  |
| 12               | 6                | 0              | 0.902419                | 4.368158  | 0.826857  |
| 13               | 1                | 0              | 0.933058                | 5.105840  | 1.624688  |
| 14               | 6                | 0              | 1.314773                | 4.734449  | -0.451524 |
| 15               | 6                | 0              | 1.382990                | 3.723035  | -1.402818 |
| 16               | 1                | 0              | 1.791654                | 3.945780  | -2.385227 |
| 17               | 6                | 0              | 0.423281                | 2.074067  | 0.128278  |
| 18               | 6                | 0              | 1.702214                | 6.155356  | -0.778230 |
| 19               | 1                | 0              | 2.438004                | 6.193769  | -1.585141 |
| 20               | 1                | 0              | 0.830060                | 6.733617  | -1.103271 |
| 21               | 1                | 0              | 2.124359                | 6.665059  | 0.091523  |
| 22               | 6                | 0              | 0.477627                | 3.073488  | 1.132426  |
| 23               | 6                | 0              | -2.431246               | 0.483756  | -1.293289 |
| 24               | 6                | 0              | -1.620215               | -0.103520 | -2.428758 |
| 25               | 1                | 0              | -1.184352               | 0.673978  | -3.060339 |



|    |   |   |           |           |           |
|----|---|---|-----------|-----------|-----------|
| 26 | 1 | 0 | -0.814929 | -0.748859 | -2.080219 |
| 27 | 1 | 0 | -2.265925 | -0.712523 | -3.065618 |
| 28 | 6 | 0 | 0.216983  | 2.793502  | 2.599102  |
| 29 | 1 | 0 | 0.989489  | 3.275472  | 3.204976  |
| 30 | 1 | 0 | -0.743143 | 3.190153  | 2.935403  |
| 31 | 1 | 0 | 0.245662  | 1.729890  | 2.833770  |
| 32 | 6 | 0 | 0.979858  | 2.412207  | -1.132268 |
| 33 | 6 | 0 | 1.299510  | 1.394619  | -2.209533 |
| 34 | 1 | 0 | 2.382974  | 1.367310  | -2.362055 |
| 35 | 1 | 0 | 0.993180  | 0.383799  | -1.959428 |
| 36 | 1 | 0 | 0.846035  | 1.661778  | -3.167919 |
| 37 | 6 | 0 | -2.844932 | 1.095702  | 1.003434  |
| 38 | 6 | 0 | -2.526655 | 1.111395  | 2.485529  |
| 39 | 1 | 0 | -1.542535 | 0.707491  | 2.715386  |
| 40 | 1 | 0 | -2.586682 | 2.116981  | 2.907638  |
| 41 | 1 | 0 | -3.257400 | 0.499719  | 3.024382  |
| 42 | 7 | 0 | 0.435889  | -0.551811 | 0.538254  |
| 43 | 6 | 0 | 1.877046  | -0.544214 | 0.534012  |
| 44 | 6 | 0 | 0.074333  | -1.913135 | 0.216863  |
| 45 | 6 | 0 | 2.359686  | -1.753050 | 0.017613  |
| 46 | 6 | 0 | 2.776130  | 0.425551  | 0.979758  |
| 47 | 6 | 0 | 1.212229  | -2.598648 | -0.216612 |
| 48 | 6 | 0 | -1.163770 | -2.613202 | 0.352345  |
| 49 | 6 | 0 | 3.730880  | -1.999244 | -0.120908 |
| 50 | 6 | 0 | 4.135760  | 0.182125  | 0.854331  |
| 51 | 1 | 0 | 2.443857  | 1.351709  | 1.419617  |
| 52 | 6 | 0 | 1.138971  | -3.908204 | -0.739142 |
| 53 | 6 | 0 | -1.229016 | -3.935366 | -0.214838 |
| 54 | 6 | 0 | -2.285997 | -2.161339 | 1.089043  |
| 55 | 6 | 0 | 4.621006  | -1.013330 | 0.294869  |
| 56 | 1 | 0 | 4.074783  | -2.943675 | -0.519989 |
| 57 | 1 | 0 | 4.858715  | 0.911706  | 1.197387  |
| 58 | 6 | 0 | -0.072884 | -4.539549 | -0.782938 |
| 59 | 1 | 0 | 2.034833  | -4.396399 | -1.105535 |
| 60 | 6 | 0 | -2.445054 | -4.659797 | -0.135055 |
| 61 | 6 | 0 | -3.437138 | -2.907509 | 1.178667  |
| 62 | 1 | 0 | -2.223707 | -1.224898 | 1.612175  |
| 63 | 1 | 0 | -0.162374 | -5.536235 | -1.201007 |
| 64 | 6 | 0 | -3.534204 | -4.157262 | 0.533828  |
| 65 | 1 | 0 | -2.488204 | -5.642300 | -0.593447 |
| 66 | 1 | 0 | -4.273853 | -2.531963 | 1.756528  |
| 67 | 1 | 0 | -4.452621 | -4.730093 | 0.594193  |
| 68 | 8 | 0 | 5.981128  | -1.114426 | 0.225591  |
| 69 | 6 | 0 | 6.540646  | -2.298996 | -0.319339 |
| 70 | 1 | 0 | 7.620286  | -2.161212 | -0.287455 |
| 71 | 1 | 0 | 6.272092  | -3.181266 | 0.273261  |
| 72 | 1 | 0 | 6.226543  | -2.451585 | -1.358445 |

-----

Compound 7 2-RF-CC-TSb

Method: b3lyp/6-311g(d,p)

SCF Done: E(RB3LYP) = -1509.44770082 A.U. after 1 cycles

Lowest frequency = -48.8430

Zero-point correction= 0.594980  
(Hartree/Particle)  
Thermal correction to Energy= 0.629247  
Thermal correction to Enthalpy= 0.630192  
Thermal correction to Gibbs Free Energy= 0.529699

Sum of electronic and zero-point Energies= -1508.852721  
 Sum of electronic and thermal Energies= -1508.818453  
 Sum of electronic and thermal Enthalpies= -1508.817509  
 Sum of electronic and thermal Free Energies= -1508.918002

Standard orientation:

| Center<br>Number | Atomic<br>Number | Atomic<br>Type | Coordinates (Angstroms) |           |           |
|------------------|------------------|----------------|-------------------------|-----------|-----------|
|                  |                  |                | X                       | Y         | Z         |
| 1                | 5                | 0              | -0.211268               | 0.643372  | 0.278353  |
| 2                | 6                | 0              | -5.680928               | 2.743345  | -0.838816 |
| 3                | 1                | 0              | -6.203573               | 2.205929  | -1.634049 |
| 4                | 1                | 0              | -6.330011               | 2.765697  | 0.039922  |
| 5                | 1                | 0              | -5.550772               | 3.777913  | -1.175586 |
| 6                | 6                | 0              | -4.349422               | 2.106796  | -0.526002 |
| 7                | 6                | 0              | -3.602095               | 1.464870  | -1.508508 |
| 8                | 1                | 0              | -4.015588               | 1.369831  | -2.508893 |
| 9                | 6                | 0              | -1.760846               | 1.008938  | 0.034983  |
| 10               | 6                | 0              | -3.821250               | 2.114757  | 0.759955  |
| 11               | 1                | 0              | -4.410065               | 2.531972  | 1.573084  |
| 12               | 6                | 0              | 1.759892                | 4.024838  | 0.806348  |
| 13               | 1                | 0              | 1.956912                | 4.731753  | 1.608318  |
| 14               | 6                | 0              | 2.208413                | 4.315533  | -0.479174 |
| 15               | 6                | 0              | 2.047928                | 3.322833  | -1.439206 |
| 16               | 1                | 0              | 2.469612                | 3.470329  | -2.430297 |
| 17               | 6                | 0              | 0.808760                | 1.884007  | 0.103595  |
| 18               | 6                | 0              | 2.867294                | 5.632810  | -0.805756 |
| 19               | 1                | 0              | 3.582979                | 5.529946  | -1.625102 |
| 20               | 1                | 0              | 2.123576                | 6.376413  | -1.113313 |
| 21               | 1                | 0              | 3.396465                | 6.040999  | 0.059040  |
| 22               | 6                | 0              | 1.087986                | 2.839486  | 1.113007  |
| 23               | 6                | 0              | -2.342652               | 0.916142  | -1.256336 |
| 24               | 6                | 0              | -1.691862               | 0.195752  | -2.417921 |
| 25               | 1                | 0              | -1.120800               | 0.879377  | -3.050355 |
| 26               | 1                | 0              | -1.026824               | -0.604847 | -2.096643 |
| 27               | 1                | 0              | -2.460744               | -0.259253 | -3.046512 |
| 28               | 6                | 0              | 0.807707                | 2.601849  | 2.583469  |
| 29               | 1                | 0              | 1.672534                | 2.915602  | 3.174945  |
| 30               | 1                | 0              | -0.047731               | 3.177126  | 2.943338  |
| 31               | 1                | 0              | 0.629929                | 1.551249  | 2.811037  |
| 32               | 6                | 0              | 1.393627                | 2.117721  | -1.167983 |
| 33               | 6                | 0              | 1.475041                | 1.069475  | -2.259991 |
| 34               | 1                | 0              | 2.526140                | 0.821241  | -2.437399 |
| 35               | 1                | 0              | 0.972210                | 0.140490  | -2.010975 |
| 36               | 1                | 0              | 1.066808                | 1.435917  | -3.205806 |
| 37               | 6                | 0              | -2.569739               | 1.569481  | 1.054871  |
| 38               | 6                | 0              | -2.218979               | 1.502858  | 2.528215  |
| 39               | 1                | 0              | -1.328558               | 0.910174  | 2.728919  |
| 40               | 1                | 0              | -2.069666               | 2.495017  | 2.959945  |
| 41               | 1                | 0              | -3.042748               | 1.039943  | 3.081054  |
| 42               | 7                | 0              | 0.301415                | -0.694573 | 0.491279  |
| 43               | 6                | 0              | 1.715138                | -0.976780 | 0.452445  |
| 44               | 6                | 0              | -0.333242               | -1.953066 | 0.168306  |
| 45               | 6                | 0              | 1.932022                | -2.254321 | -0.094582 |
| 46               | 6                | 0              | 2.796196                | -0.221295 | 0.884894  |
| 47               | 6                | 0              | 0.630125                | -2.846386 | -0.305304 |
| 48               | 6                | 0              | -1.682722               | -2.391910 | 0.333538  |
| 49               | 6                | 0              | 3.215932                | -2.758882 | -0.268935 |
| 50               | 6                | 0              | 4.087663                | -0.727834 | 0.722261  |

|    |   |   |           |           |           |
|----|---|---|-----------|-----------|-----------|
| 51 | 1 | 0 | 2.668303  | 0.745489  | 1.344079  |
| 52 | 6 | 0 | 0.282106  | -4.106662 | -0.836983 |
| 53 | 6 | 0 | -2.027733 | -3.665723 | -0.243077 |
| 54 | 6 | 0 | -2.670582 | -1.733723 | 1.106289  |
| 55 | 6 | 0 | 4.302997  | -1.983002 | 0.134761  |
| 56 | 1 | 0 | 3.397794  | -3.741759 | -0.685784 |
| 57 | 1 | 0 | 4.920523  | -0.131750 | 1.068728  |
| 58 | 6 | 0 | -1.032779 | -4.481325 | -0.850492 |
| 59 | 1 | 0 | 1.052846  | -4.758235 | -1.232238 |
| 60 | 6 | 0 | -3.362235 | -4.131925 | -0.133662 |
| 61 | 6 | 0 | -3.945324 | -2.234670 | 1.223736  |
| 62 | 1 | 0 | -2.406642 | -0.836314 | 1.634958  |
| 63 | 1 | 0 | -1.331967 | -5.433743 | -1.274156 |
| 64 | 6 | 0 | -4.309136 | -3.430316 | 0.571460  |
| 65 | 1 | 0 | -3.614829 | -5.078953 | -0.599040 |
| 66 | 1 | 0 | -4.673502 | -1.706988 | 1.829009  |
| 67 | 1 | 0 | -5.322069 | -3.807742 | 0.654009  |
| 68 | 8 | 0 | 5.535077  | -2.539754 | -0.063770 |
| 69 | 6 | 0 | 6.682996  | -1.811828 | 0.344827  |
| 70 | 1 | 0 | 7.537472  | -2.435555 | 0.086735  |
| 71 | 1 | 0 | 6.763046  | -0.854472 | -0.182714 |
| 72 | 1 | 0 | 6.682979  | -1.630678 | 1.425780  |

-----

Compound 7 2-RF-CN-TSa

Method: b3lyp/6-311g(d,p)

SCF Done: E(RB3LYP) = -1509.44354040 A.U. after 1 cycles

Lowest frequency = -28.5294

Zero-point correction= 0.594879  
(Hartree/Particle)  
Thermal correction to Energy= 0.629070  
Thermal correction to Enthalpy= 0.630014  
Thermal correction to Gibbs Free Energy= 0.529227  
Sum of electronic and zero-point Energies= -1508.848661  
Sum of electronic and thermal Energies= -1508.814470  
Sum of electronic and thermal Enthalpies= -1508.813526  
Sum of electronic and thermal Free Energies= -1508.914313

Standard orientation:

| Center<br>Number | Atomic<br>Number | Atomic<br>Type | Coordinates (Angstroms) |           |           |
|------------------|------------------|----------------|-------------------------|-----------|-----------|
|                  |                  |                | X                       | Y         | Z         |
| 1                | 5                | 0              | 0.899283                | -0.310656 | 0.179986  |
| 2                | 6                | 0              | 5.703329                | -2.450495 | -2.584754 |
| 3                | 1                | 0              | 5.441035                | -2.959370 | -3.514711 |
| 4                | 1                | 0              | 6.390537                | -1.635803 | -2.839159 |
| 5                | 1                | 0              | 6.249705                | -3.151157 | -1.949422 |
| 6                | 6                | 0              | 4.481087                | -1.913216 | -1.886902 |
| 7                | 6                | 0              | 3.346706                | -1.542379 | -2.602073 |
| 8                | 1                | 0              | 3.348043                | -1.662956 | -3.680597 |
| 9                | 6                | 0              | 2.163807                | -0.853428 | -0.560860 |
| 10               | 6                | 0              | 4.458981                | -1.735798 | -0.506734 |
| 11               | 1                | 0              | 5.337023                | -2.008124 | 0.070199  |
| 12               | 6                | 0              | 0.576224                | 1.187947  | 3.806235  |
| 13               | 1                | 0              | 0.761658                | 2.134758  | 4.306442  |
| 14               | 6                | 0              | 0.025367                | 0.134706  | 4.529717  |
| 15               | 6                | 0              | -0.108440               | -1.083550 | 3.870992  |

|    |   |   |           |           |           |
|----|---|---|-----------|-----------|-----------|
| 16 | 1 | 0 | -0.468975 | -1.947992 | 4.422402  |
| 17 | 6 | 0 | 0.707157  | -0.147509 | 1.766185  |
| 18 | 6 | 0 | -0.391736 | 0.301540  | 5.970143  |
| 19 | 1 | 0 | -1.436525 | 0.624255  | 6.039808  |
| 20 | 1 | 0 | -0.303110 | -0.636619 | 6.523488  |
| 21 | 1 | 0 | 0.216018  | 1.054656  | 6.477734  |
| 22 | 6 | 0 | 0.925672  | 1.067266  | 2.459007  |
| 23 | 6 | 0 | 2.206386  | -1.018723 | -1.991586 |
| 24 | 6 | 0 | 1.090217  | -0.658051 | -2.954077 |
| 25 | 1 | 0 | 0.200308  | -1.271864 | -2.812487 |
| 26 | 1 | 0 | 0.775760  | 0.380734  | -2.861683 |
| 27 | 1 | 0 | 1.436086  | -0.811304 | -3.978064 |
| 28 | 6 | 0 | 1.602119  | 2.263401  | 1.826609  |
| 29 | 1 | 0 | 2.223412  | 2.777373  | 2.564884  |
| 30 | 1 | 0 | 2.249352  | 1.982225  | 0.995119  |
| 31 | 1 | 0 | 0.881309  | 2.989915  | 1.446246  |
| 32 | 6 | 0 | 0.229447  | -1.245847 | 2.525253  |
| 33 | 6 | 0 | 0.123298  | -2.653184 | 1.972038  |
| 34 | 1 | 0 | -0.897340 | -2.896143 | 1.669413  |
| 35 | 1 | 0 | 0.771094  | -2.811849 | 1.108199  |
| 36 | 1 | 0 | 0.419051  | -3.376966 | 2.736469  |
| 37 | 6 | 0 | 3.351962  | -1.218650 | 0.164157  |
| 38 | 6 | 0 | 3.524560  | -1.080315 | 1.662700  |
| 39 | 1 | 0 | 3.355322  | -0.060949 | 2.008227  |
| 40 | 1 | 0 | 2.837427  | -1.715569 | 2.222147  |
| 41 | 1 | 0 | 4.541572  | -1.363545 | 1.939873  |
| 42 | 7 | 0 | -0.362379 | 0.017162  | -0.616672 |
| 43 | 6 | 0 | -1.398774 | -0.936232 | -0.706274 |
| 44 | 6 | 0 | -0.985787 | 1.268796  | -0.701961 |
| 45 | 6 | 0 | -2.654395 | -0.290393 | -0.731190 |
| 46 | 6 | 0 | -1.322834 | -2.324672 | -0.862196 |
| 47 | 6 | 0 | -2.383454 | 1.121614  | -0.716455 |
| 48 | 6 | 0 | -0.388504 | 2.539473  | -0.965826 |
| 49 | 6 | 0 | -3.842203 | -1.028680 | -0.848510 |
| 50 | 6 | 0 | -2.498028 | -3.046975 | -0.985546 |
| 51 | 1 | 0 | -0.371154 | -2.837949 | -0.904337 |
| 52 | 6 | 0 | -3.229213 | 2.252053  | -0.787515 |
| 53 | 6 | 0 | -1.267355 | 3.673422  | -1.023919 |
| 54 | 6 | 0 | 0.980326  | 2.732457  | -1.276191 |
| 55 | 6 | 0 | -3.755893 | -2.410978 | -0.963194 |
| 56 | 1 | 0 | -4.795400 | -0.517773 | -0.869826 |
| 57 | 1 | 0 | -2.477202 | -4.121816 | -1.117023 |
| 58 | 6 | 0 | -2.678137 | 3.500393  | -0.894533 |
| 59 | 1 | 0 | -4.306113 | 2.126246  | -0.760357 |
| 60 | 6 | 0 | -0.710136 | 4.950240  | -1.281963 |
| 61 | 6 | 0 | 1.479993  | 3.983077  | -1.561202 |
| 62 | 1 | 0 | 1.646493  | 1.878910  | -1.298539 |
| 63 | 1 | 0 | -3.311456 | 4.379578  | -0.939641 |
| 64 | 6 | 0 | 0.631930  | 5.108855  | -1.540672 |
| 65 | 1 | 0 | -1.374143 | 5.808407  | -1.299844 |
| 66 | 1 | 0 | 2.529646  | 4.101664  | -1.805363 |
| 67 | 1 | 0 | 1.034418  | 6.093201  | -1.751622 |
| 68 | 8 | 0 | -4.829172 | -3.251972 | -1.087747 |
| 69 | 6 | 0 | -6.127978 | -2.683972 | -1.082283 |
| 70 | 1 | 0 | -6.272286 | -1.997367 | -1.925010 |
| 71 | 1 | 0 | -6.820443 | -3.519044 | -1.178530 |
| 72 | 1 | 0 | -6.331716 | -2.151999 | -0.145409 |

-----  
Compound 7 2-RF-CN-TSb

Method: b3lyp/6-311g(d,p)  
 SCF Done: E(RB3LYP) = -1509.44247192 A.U. after 1 cycles  
 Lowest frequency = -28.3566

Zero-point correction= 0.594805  
 (Hartree/Particle)  
 Thermal correction to Energy= 0.629023  
 Thermal correction to Enthalpy= 0.629967  
 Thermal correction to Gibbs Free Energy= 0.529122  
 Sum of electronic and zero-point Energies= -1508.847667  
 Sum of electronic and thermal Energies= -1508.813449  
 Sum of electronic and thermal Enthalpies= -1508.812505  
 Sum of electronic and thermal Free Energies= -1508.913350

Standard orientation:

| Center<br>Number | Atomic<br>Number | Atomic<br>Type | Coordinates (Angstroms) |           |           |
|------------------|------------------|----------------|-------------------------|-----------|-----------|
|                  |                  |                | X                       | Y         | Z         |
| 1                | 5                | 0              | 0.806926                | -0.365514 | 0.216641  |
| 2                | 6                | 0              | 5.291893                | -3.356634 | -2.283223 |
| 3                | 1                | 0              | 4.975692                | -3.879307 | -3.188422 |
| 4                | 1                | 0              | 6.094839                | -2.666811 | -2.566241 |
| 5                | 1                | 0              | 5.718959                | -4.087735 | -1.593085 |
| 6                | 6                | 0              | 4.148091                | -2.606606 | -1.651707 |
| 7                | 6                | 0              | 3.088392                | -2.129514 | -2.416647 |
| 8                | 1                | 0              | 3.087964                | -2.322953 | -3.484526 |
| 9                | 6                | 0              | 1.987174                | -1.140601 | -0.454485 |
| 10               | 6                | 0              | 4.130820                | -2.334964 | -0.286878 |
| 11               | 1                | 0              | 4.952128                | -2.689351 | 0.327828  |
| 12               | 6                | 0              | 0.665264                | 1.418638  | 3.722877  |
| 13               | 1                | 0              | 0.983558                | 2.360958  | 4.160771  |
| 14               | 6                | 0              | -0.045806               | 0.513111  | 4.504273  |
| 15               | 6                | 0              | -0.351572               | -0.715935 | 3.928090  |
| 16               | 1                | 0              | -0.844210               | -1.475652 | 4.529314  |
| 17               | 6                | 0              | 0.620754                | -0.063872 | 1.783107  |
| 18               | 6                | 0              | -0.451980               | 0.842647  | 5.919533  |
| 19               | 1                | 0              | -1.439728               | 1.316316  | 5.942355  |
| 20               | 1                | 0              | -0.507179               | -0.055659 | 6.539400  |
| 21               | 1                | 0              | 0.252215                | 1.535583  | 6.386549  |
| 22               | 6                | 0              | 1.009515                | 1.151560  | 2.395541  |
| 23               | 6                | 0              | 2.025633                | -1.409335 | -1.869477 |
| 24               | 6                | 0              | 0.985152                | -0.963150 | -2.879706 |
| 25               | 1                | 0              | 0.011219                | -1.422404 | -2.709237 |
| 26               | 1                | 0              | 0.831046                | 0.115264  | -2.874021 |
| 27               | 1                | 0              | 1.312837                | -1.247053 | -3.881580 |
| 28               | 6                | 0              | 1.864840                | 2.185908  | 1.697803  |
| 29               | 1                | 0              | 2.546405                | 2.654138  | 2.412951  |
| 30               | 1                | 0              | 2.473402                | 1.753041  | 0.903025  |
| 31               | 1                | 0              | 1.265292                | 2.981679  | 1.251377  |
| 32               | 6                | 0              | -0.024914               | -1.022157 | 2.604874  |
| 33               | 6                | 0              | -0.333352               | -2.434184 | 2.147465  |
| 34               | 1                | 0              | -1.375447               | -2.543235 | 1.840131  |
| 35               | 1                | 0              | 0.292852                | -2.747631 | 1.310405  |
| 36               | 1                | 0              | -0.157180               | -3.137476 | 2.966111  |
| 37               | 6                | 0              | 3.099371                | -1.621616 | 0.321714  |
| 38               | 6                | 0              | 3.267286                | -1.408791 | 1.812038  |
| 39               | 1                | 0              | 3.245467                | -0.354530 | 2.086305  |
| 40               | 1                | 0              | 2.485045                | -1.896884 | 2.393883  |

|    |   |   |           |           |           |
|----|---|---|-----------|-----------|-----------|
| 41 | 1 | 0 | 4.226767  | -1.818592 | 2.132718  |
| 42 | 7 | 0 | -0.378383 | 0.090224  | -0.631533 |
| 43 | 6 | 0 | -1.547026 | -0.701465 | -0.676379 |
| 44 | 6 | 0 | -0.805746 | 1.413396  | -0.813432 |
| 45 | 6 | 0 | -2.693724 | 0.127911  | -0.765504 |
| 46 | 6 | 0 | -1.683393 | -2.085666 | -0.735294 |
| 47 | 6 | 0 | -2.208020 | 1.481132  | -0.841330 |
| 48 | 6 | 0 | -0.019455 | 2.557083  | -1.151641 |
| 49 | 6 | 0 | -3.967770 | -0.430828 | -0.850159 |
| 50 | 6 | 0 | -2.960404 | -2.638931 | -0.827031 |
| 51 | 1 | 0 | -0.821373 | -2.739758 | -0.725075 |
| 52 | 6 | 0 | -2.871534 | 2.717673  | -1.004946 |
| 53 | 6 | 0 | -0.714447 | 3.804489  | -1.302948 |
| 54 | 6 | 0 | 1.365722  | 2.517504  | -1.446878 |
| 55 | 6 | 0 | -4.100486 | -1.817512 | -0.868515 |
| 56 | 1 | 0 | -4.859087 | 0.180436  | -0.923879 |
| 57 | 1 | 0 | -3.056130 | -3.714747 | -0.880376 |
| 58 | 6 | 0 | -2.135597 | 3.857600  | -1.187770 |
| 59 | 1 | 0 | -3.955103 | 2.756691  | -0.988702 |
| 60 | 6 | 0 | 0.034115  | 4.960626  | -1.636353 |
| 61 | 6 | 0 | 2.053257  | 3.654442  | -1.806238 |
| 62 | 1 | 0 | 1.893576  | 1.573213  | -1.397133 |
| 63 | 1 | 0 | -2.627034 | 4.817192  | -1.304676 |
| 64 | 6 | 0 | 1.386691  | 4.894616  | -1.879078 |
| 65 | 1 | 0 | -0.490476 | 5.906427  | -1.725109 |
| 66 | 1 | 0 | 3.110943  | 3.595105  | -2.036898 |
| 67 | 1 | 0 | 1.936867  | 5.789152  | -2.148502 |
| 68 | 8 | 0 | -5.384045 | -2.290289 | -0.954010 |
| 69 | 6 | 0 | -5.588868 | -3.692079 | -0.995621 |
| 70 | 1 | 0 | -5.208650 | -4.184744 | -0.092767 |
| 71 | 1 | 0 | -6.667276 | -3.834057 | -1.052031 |
| 72 | 1 | 0 | -5.121043 | -4.145291 | -1.877731 |

-----

Compound 7 3-RF-TSa

Method: b3lyp/6-311g(d,p)

SCF Done: E(RB3LYP) = -1509.40327759 A.U. after 1 cycles

Lowest frequency = -25.7394

Zero-point correction= 0.595111  
(Hartree/Particle)  
Thermal correction to Energy= 0.629126  
Thermal correction to Enthalpy= 0.630070  
Thermal correction to Gibbs Free Energy= 0.529627  
Sum of electronic and zero-point Energies= -1508.808167  
Sum of electronic and thermal Energies= -1508.774152  
Sum of electronic and thermal Enthalpies= -1508.773208  
Sum of electronic and thermal Free Energies= -1508.873651

Standard orientation:

-----

| Center<br>Number | Atomic<br>Number | Atomic<br>Type | Coordinates (Angstroms) |           |          |
|------------------|------------------|----------------|-------------------------|-----------|----------|
|                  |                  |                | X                       | Y         | Z        |
| 1                | 5                | 0              | -0.891392               | -0.193988 | 0.240826 |
| 2                | 6                | 0              | 0.682269                | 1.823703  | 5.676576 |
| 3                | 1                | 0              | 0.051205                | 1.388819  | 6.457449 |
| 4                | 1                | 0              | 1.712026                | 1.514463  | 5.884274 |
| 5                | 1                | 0              | 0.635636                | 2.910497  | 5.771291 |

-----

|    |   |   |           |           |           |
|----|---|---|-----------|-----------|-----------|
| 6  | 6 | 0 | 0.246414  | 1.372180  | 4.305198  |
| 7  | 6 | 0 | 0.080964  | 0.022684  | 4.004542  |
| 8  | 1 | 0 | 0.260898  | -0.718773 | 4.777594  |
| 9  | 6 | 0 | -0.553573 | 0.496880  | 1.670621  |
| 10 | 6 | 0 | -0.008848 | 2.267612  | 3.281976  |
| 11 | 1 | 0 | 0.088043  | 3.332336  | 3.476568  |
| 12 | 6 | 0 | -4.615811 | -0.414735 | -0.799890 |
| 13 | 1 | 0 | -5.395300 | 0.326538  | -0.949744 |
| 14 | 6 | 0 | -4.876443 | -1.744610 | -1.111316 |
| 15 | 6 | 0 | -3.875059 | -2.653612 | -0.811692 |
| 16 | 1 | 0 | -4.064383 | -3.712741 | -0.964208 |
| 17 | 6 | 0 | -2.310426 | -0.907979 | -0.078240 |
| 18 | 6 | 0 | -6.187680 | -2.171777 | -1.721019 |
| 19 | 1 | 0 | -6.186333 | -2.009446 | -2.804520 |
| 20 | 1 | 0 | -6.381650 | -3.232701 | -1.548279 |
| 21 | 1 | 0 | -7.024042 | -1.601195 | -1.308813 |
| 22 | 6 | 0 | -3.392689 | 0.010035  | -0.280930 |
| 23 | 6 | 0 | -0.313699 | -0.419861 | 2.744783  |
| 24 | 6 | 0 | -0.447859 | -1.915509 | 2.592872  |
| 25 | 1 | 0 | -1.458308 | -2.196874 | 2.297633  |
| 26 | 1 | 0 | 0.251874  | -2.314385 | 1.854929  |
| 27 | 1 | 0 | -0.230770 | -2.413729 | 3.539310  |
| 28 | 6 | 0 | -3.321082 | 1.481389  | 0.065921  |
| 29 | 1 | 0 | -2.904812 | 1.642138  | 1.059275  |
| 30 | 1 | 0 | -2.725723 | 2.054880  | -0.646684 |
| 31 | 1 | 0 | -4.323980 | 1.911862  | 0.054734  |
| 32 | 6 | 0 | -2.628402 | -2.279633 | -0.290864 |
| 33 | 6 | 0 | -1.792723 | -3.480564 | 0.118652  |
| 34 | 1 | 0 | -1.755084 | -4.217068 | -0.689303 |
| 35 | 1 | 0 | -0.778691 | -3.255514 | 0.411275  |
| 36 | 1 | 0 | -2.274542 | -3.975129 | 0.969231  |
| 37 | 6 | 0 | -0.393957 | 1.870582  | 1.992382  |
| 38 | 6 | 0 | -0.651395 | 3.044163  | 1.071531  |
| 39 | 1 | 0 | -0.990320 | 2.772176  | 0.084685  |
| 40 | 1 | 0 | -1.410268 | 3.700115  | 1.510950  |
| 41 | 1 | 0 | 0.257668  | 3.638806  | 0.951032  |
| 42 | 7 | 0 | 0.181386  | -0.167399 | -0.853012 |
| 43 | 6 | 0 | 1.093930  | -1.283939 | -0.837761 |
| 44 | 6 | 0 | 1.047823  | 0.951686  | -0.982600 |
| 45 | 6 | 0 | 2.413813  | -0.832550 | -0.615352 |
| 46 | 6 | 0 | 0.878097  | -2.614520 | -1.184247 |
| 47 | 6 | 0 | 2.375706  | 0.610434  | -0.719366 |
| 48 | 6 | 0 | 0.732655  | 2.191934  | -1.598131 |
| 49 | 6 | 0 | 3.487412  | -1.729372 | -0.562657 |
| 50 | 6 | 0 | 1.942115  | -3.505475 | -1.141404 |
| 51 | 1 | 0 | -0.083596 | -2.941005 | -1.543790 |
| 52 | 6 | 0 | 3.396664  | 1.585754  | -0.783902 |
| 53 | 6 | 0 | 1.773228  | 3.176705  | -1.658565 |
| 54 | 6 | 0 | -0.496229 | 2.453283  | -2.255854 |
| 55 | 6 | 0 | 3.235641  | -3.080528 | -0.791070 |
| 56 | 1 | 0 | 4.491119  | -1.361067 | -0.398753 |
| 57 | 1 | 0 | 1.806126  | -4.544035 | -1.416818 |
| 58 | 6 | 0 | 3.082533  | 2.856176  | -1.194466 |
| 59 | 1 | 0 | 4.418559  | 1.325880  | -0.531087 |
| 60 | 6 | 0 | 1.482585  | 4.429510  | -2.255211 |
| 61 | 6 | 0 | -0.727541 | 3.667039  | -2.859775 |
| 62 | 1 | 0 | -1.237652 | 1.665030  | -2.305139 |
| 63 | 1 | 0 | 3.850130  | 3.620945  | -1.244287 |
| 64 | 6 | 0 | 0.259009  | 4.677645  | -2.832304 |
| 65 | 1 | 0 | 2.259358  | 5.187096  | -2.275070 |

|    |   |   |           |           |           |
|----|---|---|-----------|-----------|-----------|
| 66 | 1 | 0 | -1.665771 | 3.845489  | -3.373087 |
| 67 | 1 | 0 | 0.060905  | 5.636466  | -3.297764 |
| 68 | 8 | 0 | 4.185275  | -4.062777 | -0.765029 |
| 69 | 6 | 0 | 5.521057  | -3.698223 | -0.455765 |
| 70 | 1 | 0 | 6.092755  | -4.624956 | -0.463274 |
| 71 | 1 | 0 | 5.936143  | -3.013238 | -1.204379 |
| 72 | 1 | 0 | 5.592848  | -3.236756 | 0.535922  |

-----

Compound 7 3-RF-TSb

Method: b3lyp/6-311g(d,p)

SCF Done: E(RB3LYP) = -1509.40276505 A.U. after 1 cycles

Lowest frequency = -25.4911

Zero-point correction= 0.595108  
(Hartree/Particle)  
Thermal correction to Energy= 0.629121  
Thermal correction to Enthalpy= 0.630065  
Thermal correction to Gibbs Free Energy= 0.529691  
Sum of electronic and zero-point Energies= -1508.807657  
Sum of electronic and thermal Energies= -1508.773644  
Sum of electronic and thermal Enthalpies= -1508.772700  
Sum of electronic and thermal Free Energies= -1508.873074

Standard orientation:

| Center<br>Number | Atomic<br>Number | Atomic<br>Type | Coordinates (Angstroms) |           |           |
|------------------|------------------|----------------|-------------------------|-----------|-----------|
|                  |                  |                | X                       | Y         | Z         |
| 1                | 5                | 0              | -0.799623               | -0.313248 | 0.250944  |
| 2                | 6                | 0              | 0.147017                | 2.215780  | 5.616616  |
| 3                | 1                | 0              | -0.385469               | 1.678234  | 6.406894  |
| 4                | 1                | 0              | 1.215404                | 2.157504  | 5.849745  |
| 5                | 1                | 0              | -0.147195               | 3.266180  | 5.665323  |
| 6                | 6                | 0              | -0.144528               | 1.625437  | 4.259807  |
| 7                | 6                | 0              | -0.006428               | 0.261153  | 4.017744  |
| 8                | 1                | 0              | 0.307866                | -0.391777 | 4.826839  |
| 9                | 6                | 0              | -0.662461               | 0.492386  | 1.653338  |
| 10               | 6                | 0              | -0.558617               | 2.402329  | 3.192540  |
| 11               | 1                | 0              | -0.699316               | 3.469654  | 3.340519  |
| 12               | 6                | 0              | -4.357960               | -1.387519 | -0.840056 |
| 13               | 1                | 0              | -5.277164               | -0.842455 | -1.033755 |
| 14               | 6                | 0              | -4.312294               | -2.752791 | -1.099673 |
| 15               | 6                | 0              | -3.143458               | -3.406972 | -0.746190 |
| 16               | 1                | 0              | -3.091729               | -4.486765 | -0.857292 |
| 17               | 6                | 0              | -2.019684               | -1.333178 | -0.060471 |
| 18               | 6                | 0              | -5.481985               | -3.480881 | -1.712302 |
| 19               | 1                | 0              | -5.487469               | -3.365093 | -2.801758 |
| 20               | 1                | 0              | -5.444119               | -4.550884 | -1.496121 |
| 21               | 1                | 0              | -6.433371               | -3.091844 | -1.340214 |
| 22               | 6                | 0              | -3.271492               | -0.684430 | -0.319222 |
| 23               | 6                | 0              | -0.260646               | -0.306670 | 2.772181  |
| 24               | 6                | 0              | -0.063329               | -1.800635 | 2.685018  |
| 25               | 1                | 0              | -0.979229               | -2.306635 | 2.380825  |
| 26               | 1                | 0              | 0.728809                | -2.065844 | 1.981031  |
| 27               | 1                | 0              | 0.227384                | -2.201864 | 3.657447  |
| 28               | 6                | 0              | -3.533267               | 0.778679  | -0.034135 |
| 29               | 1                | 0              | -3.186432               | 1.065216  | 0.957554  |
| 30               | 1                | 0              | -3.061135               | 1.441418  | -0.761510 |



|    |   |   |           |           |           |
|----|---|---|-----------|-----------|-----------|
| 31 | 1 | 0 | -4.605659 | 0.976690  | -0.078998 |
| 32 | 6 | 0 | -2.023079 | -2.747873 | -0.221537 |
| 33 | 6 | 0 | -0.953051 | -3.717320 | 0.250887  |
| 34 | 1 | 0 | -0.731590 | -4.454848 | -0.526258 |
| 35 | 1 | 0 | -0.022935 | -3.260372 | 0.552149  |
| 36 | 1 | 0 | -1.335138 | -4.276517 | 1.112030  |
| 37 | 6 | 0 | -0.812691 | 1.879707  | 1.915351  |
| 38 | 6 | 0 | -1.291437 | 2.931178  | 0.937171  |
| 39 | 1 | 0 | -1.541007 | 2.551410  | -0.040789 |
| 40 | 1 | 0 | -2.182723 | 3.428041  | 1.334584  |
| 41 | 1 | 0 | -0.526867 | 3.700445  | 0.802236  |
| 42 | 7 | 0 | 0.270470  | -0.098409 | -0.822248 |
| 43 | 6 | 0 | 1.408847  | -0.982317 | -0.743902 |
| 44 | 6 | 0 | 0.871533  | 1.180204  | -0.990281 |
| 45 | 6 | 0 | 2.591629  | -0.233314 | -0.511089 |
| 46 | 6 | 0 | 1.508043  | -2.332582 | -1.032827 |
| 47 | 6 | 0 | 2.232075  | 1.159689  | -0.682715 |
| 48 | 6 | 0 | 0.305187  | 2.289578  | -1.671797 |
| 49 | 6 | 0 | 3.824661  | -0.864978 | -0.396553 |
| 50 | 6 | 0 | 2.748118  | -2.970502 | -0.926144 |
| 51 | 1 | 0 | 0.655888  | -2.882603 | -1.396275 |
| 52 | 6 | 0 | 3.011040  | 2.334670  | -0.775449 |
| 53 | 6 | 0 | 1.100701  | 3.479419  | -1.760999 |
| 54 | 6 | 0 | -0.932645 | 2.239338  | -2.362021 |
| 55 | 6 | 0 | 3.895930  | -2.249389 | -0.568613 |
| 56 | 1 | 0 | 4.740659  | -0.311378 | -0.229816 |
| 57 | 1 | 0 | 2.810512  | -4.023624 | -1.163664 |
| 58 | 6 | 0 | 2.433518  | 3.482584  | -1.255827 |
| 59 | 1 | 0 | 4.056879  | 2.320517  | -0.490138 |
| 60 | 6 | 0 | 0.554417  | 4.607463  | -2.424014 |
| 61 | 6 | 0 | -1.412032 | 3.342370  | -3.028846 |
| 62 | 1 | 0 | -1.478076 | 1.303646  | -2.384220 |
| 63 | 1 | 0 | 3.012070  | 4.397136  | -1.329081 |
| 64 | 6 | 0 | -0.676680 | 4.548614  | -3.034251 |
| 65 | 1 | 0 | 1.142249  | 5.518648  | -2.467038 |
| 66 | 1 | 0 | -2.351963 | 3.283397  | -3.566110 |
| 67 | 1 | 0 | -1.070752 | 5.417068  | -3.549783 |
| 68 | 8 | 0 | 5.139953  | -2.799362 | -0.429354 |
| 69 | 6 | 0 | 5.294337  | -4.191936 | -0.652266 |
| 70 | 1 | 0 | 6.346059  | -4.407568 | -0.469955 |
| 71 | 1 | 0 | 4.680418  | -4.781881 | 0.038173  |
| 72 | 1 | 0 | 5.044614  | -4.466997 | -1.683583 |

-----

Compound 8 GS1

Method: b3lyp/6-311g(d,p)

SCF Done: E(RB3LYP) = -1732.06260351 A.U. after 1 cycles

Lowest frequency = 7.7978

|                                              |              |
|----------------------------------------------|--------------|
| Zero-point correction=                       | 0.566817     |
| (Hartree/Particle)                           |              |
| Thermal correction to Energy=                | 0.603487     |
| Thermal correction to Enthalpy=              | 0.604431     |
| Thermal correction to Gibbs Free Energy=     | 0.494559     |
| Sum of electronic and zero-point Energies=   | -1731.495786 |
| Sum of electronic and thermal Energies=      | -1731.459117 |
| Sum of electronic and thermal Enthalpies=    | -1731.458173 |
| Sum of electronic and thermal Free Energies= | -1731.568044 |

## Standard orientation:

| Center<br>Number | Atomic<br>Number | Atomic<br>Type | Coordinates (Angstroms) |           |           |
|------------------|------------------|----------------|-------------------------|-----------|-----------|
|                  |                  |                | X                       | Y         | Z         |
| 1                | 5                | 0              | 0.810114                | 0.719357  | -0.026936 |
| 2                | 6                | 0              | 0.764748                | 3.000038  | 2.003983  |
| 3                | 1                | 0              | 0.168291                | 2.183192  | 2.418460  |
| 4                | 1                | 0              | 1.814244                | 2.736915  | 2.154518  |
| 5                | 1                | 0              | 0.553559                | 3.892960  | 2.595693  |
| 6                | 6                | 0              | 3.517432                | 1.870433  | -0.906242 |
| 7                | 1                | 0              | 4.567363                | 1.986815  | -1.182871 |
| 8                | 1                | 0              | 2.991977                | 1.470259  | -1.776381 |
| 9                | 1                | 0              | 3.107047                | 2.867149  | -0.726322 |
| 10               | 6                | 0              | 0.905933                | -0.994169 | 2.500768  |
| 11               | 1                | 0              | 0.026491                | -0.355845 | 2.402896  |
| 12               | 1                | 0              | 0.668642                | -1.946206 | 2.017814  |
| 13               | 1                | 0              | 1.048058                | -1.195745 | 3.564378  |
| 14               | 6                | 0              | 5.837295                | -0.296178 | 2.961318  |
| 15               | 1                | 0              | 6.382406                | -1.138346 | 2.520792  |
| 16               | 1                | 0              | 6.502883                | 0.570297  | 2.936577  |
| 17               | 1                | 0              | 5.639268                | -0.544890 | 4.006150  |
| 18               | 6                | 0              | 4.559054                | -0.031545 | 2.205453  |
| 19               | 6                | 0              | 4.556557                | 0.744552  | 1.045981  |
| 20               | 1                | 0              | 5.489990                | 1.179791  | 0.700633  |
| 21               | 6                | 0              | 3.392146                | 0.987524  | 0.319907  |
| 22               | 6                | 0              | 2.159797                | 0.408813  | 0.730469  |
| 23               | 6                | 0              | 2.158096                | -0.371416 | 1.916117  |
| 24               | 6                | 0              | 3.345380                | -0.565040 | 2.627343  |
| 25               | 1                | 0              | 3.315561                | -1.151090 | 3.541325  |
| 26               | 6                | 0              | 0.083297                | 2.525942  | -1.752374 |
| 27               | 6                | 0              | -0.183935               | 3.851106  | -2.101137 |
| 28               | 1                | 0              | -0.426720               | 4.081949  | -3.134383 |
| 29               | 6                | 0              | -0.159275               | 4.883038  | -1.164394 |
| 30               | 6                | 0              | 0.150026                | 4.554669  | 0.155464  |
| 31               | 1                | 0              | 0.156488                | 5.338661  | 0.907211  |
| 32               | 6                | 0              | 0.452937                | 3.248182  | 0.542114  |
| 33               | 6                | 0              | 0.422411                | 2.200683  | -0.413789 |
| 34               | 6                | 0              | -0.005632               | 1.484122  | -2.850307 |
| 35               | 1                | 0              | -0.915149               | 0.883799  | -2.758514 |
| 36               | 1                | 0              | -0.026922               | 1.965787  | -3.829836 |
| 37               | 1                | 0              | 0.835340                | 0.787485  | -2.844719 |
| 38               | 6                | 0              | -0.434905               | 6.310275  | -1.568462 |
| 39               | 1                | 0              | -0.887348               | 6.876116  | -0.750797 |
| 40               | 1                | 0              | 0.492494                | 6.823312  | -1.846518 |
| 41               | 1                | 0              | -1.105503               | 6.359047  | -2.429378 |
| 42               | 7                | 0              | -0.145551               | -0.355060 | -0.340952 |
| 43               | 6                | 0              | -1.538134               | -0.232171 | -0.079524 |
| 44               | 6                | 0              | 0.094831                | -1.737379 | -0.564307 |
| 45               | 6                | 0              | -2.120835               | -1.517767 | -0.036683 |
| 46               | 6                | 0              | -2.319923               | 0.898714  | 0.182716  |
| 47               | 6                | 0              | -1.079351               | -2.463645 | -0.342408 |
| 48               | 6                | 0              | 1.259248                | -2.391764 | -1.077879 |
| 49               | 6                | 0              | -3.476925               | -1.682102 | 0.250324  |
| 50               | 6                | 0              | -3.668590               | 0.723404  | 0.458214  |
| 51               | 1                | 0              | -1.903769               | 1.893292  | 0.164800  |
| 52               | 6                | 0              | -1.115234               | -3.871399 | -0.454095 |
| 53               | 6                | 0              | 1.209848                | -3.826502 | -1.161069 |
| 54               | 6                | 0              | 2.413987                | -1.741966 | -1.577511 |
| 55               | 6                | 0              | -4.247856               | -0.554896 | 0.494822  |

|    |   |   |           |           |           |
|----|---|---|-----------|-----------|-----------|
| 56 | 1 | 0 | -3.921816 | -2.668020 | 0.286224  |
| 57 | 1 | 0 | -4.284206 | 1.592553  | 0.654705  |
| 58 | 6 | 0 | 0.021930  | -4.536000 | -0.818828 |
| 59 | 1 | 0 | -2.033425 | -4.409824 | -0.249262 |
| 60 | 6 | 0 | 2.344561  | -4.526316 | -1.641532 |
| 61 | 6 | 0 | 3.486306  | -2.452239 | -2.065352 |
| 62 | 1 | 0 | 2.455840  | -0.665412 | -1.587217 |
| 63 | 1 | 0 | 0.027362  | -5.617599 | -0.896108 |
| 64 | 6 | 0 | 3.465020  | -3.861017 | -2.077301 |
| 65 | 1 | 0 | 2.302111  | -5.609775 | -1.678995 |
| 66 | 1 | 0 | 4.351255  | -1.921825 | -2.446809 |
| 67 | 1 | 0 | 4.319836  | -4.413630 | -2.450094 |
| 68 | 6 | 0 | -5.717948 | -0.675784 | 0.768218  |
| 69 | 9 | 0 | -6.095649 | 0.057064  | 1.842856  |
| 70 | 9 | 0 | -6.465943 | -0.232534 | -0.272358 |
| 71 | 9 | 0 | -6.098089 | -1.950724 | 1.004755  |

-----

Compound 8 1-RF-C-TS

Method: b3lyp/6-311g(d,p)

SCF Done: E(RB3LYP) = -1731.99420888 A.U. after 1 cycles

Lowest frequency = -26.3633

Zero-point correction= 0.566548  
(Hartree/Particle)  
Thermal correction to Energy= 0.601655  
Thermal correction to Enthalpy= 0.602599  
Thermal correction to Gibbs Free Energy= 0.498913  
Sum of electronic and zero-point Energies= -1731.427661  
Sum of electronic and thermal Energies= -1731.392554  
Sum of electronic and thermal Enthalpies= -1731.391610  
Sum of electronic and thermal Free Energies= -1731.495296

Standard orientation:

| Center<br>Number | Atomic<br>Number | Atomic<br>Type | Coordinates (Angstroms) |          |           |
|------------------|------------------|----------------|-------------------------|----------|-----------|
|                  |                  |                | X                       | Y        | Z         |
| 1                | 5                | 0              | 0.608445                | 1.155561 | -0.296121 |
| 2                | 6                | 0              | 3.668070                | 1.600005 | 4.618737  |
| 3                | 1                | 0              | 3.488460                | 2.511186 | 5.193769  |
| 4                | 1                | 0              | 3.208463                | 0.769900 | 5.166932  |
| 5                | 1                | 0              | 4.744876                | 1.414908 | 4.594092  |
| 6                | 6                | 0              | 3.092007                | 1.698278 | 3.231048  |
| 7                | 6                | 0              | 2.066574                | 2.584136 | 2.922764  |
| 8                | 1                | 0              | 1.752135                | 3.307950 | 3.669312  |
| 9                | 6                | 0              | 1.785133                | 1.641446 | 0.670156  |
| 10               | 6                | 0              | 3.626063                | 0.978297 | 2.162499  |
| 11               | 1                | 0              | 4.562006                | 0.442486 | 2.295003  |
| 12               | 6                | 0              | -1.479262               | 3.637158 | -2.405291 |
| 13               | 1                | 0              | -1.380623               | 4.109530 | -3.378878 |
| 14               | 6                | 0              | -2.602464               | 3.912416 | -1.622865 |
| 15               | 6                | 0              | -2.694835               | 3.287515 | -0.381565 |
| 16               | 1                | 0              | -3.560691               | 3.483980 | 0.245475  |
| 17               | 6                | 0              | -0.574602               | 2.143295 | -0.705439 |
| 18               | 6                | 0              | -3.661760               | 4.878321 | -2.096551 |
| 19               | 1                | 0              | -4.611842               | 4.710505 | -1.584610 |
| 20               | 1                | 0              | -3.363245               | 5.914765 | -1.904141 |
| 21               | 1                | 0              | -3.834643               | 4.785270 | -3.171832 |

|    |   |   |           |           |           |
|----|---|---|-----------|-----------|-----------|
| 22 | 6 | 0 | -0.476492 | 2.770520  | -1.969298 |
| 23 | 6 | 0 | 1.454424  | 2.627695  | 1.663708  |
| 24 | 6 | 0 | 0.596918  | 3.862040  | 1.436878  |
| 25 | 1 | 0 | 0.451689  | 4.091432  | 0.386567  |
| 26 | 1 | 0 | -0.383205 | 3.808203  | 1.911561  |
| 27 | 1 | 0 | 1.123012  | 4.706047  | 1.892381  |
| 28 | 6 | 0 | 0.706848  | 2.506085  | -2.876833 |
| 29 | 1 | 0 | 0.718470  | 3.198463  | -3.720961 |
| 30 | 1 | 0 | 1.657134  | 2.615172  | -2.344749 |
| 31 | 1 | 0 | 0.674415  | 1.490232  | -3.284626 |
| 32 | 6 | 0 | -1.709645 | 2.414102  | 0.088381  |
| 33 | 6 | 0 | -1.932805 | 1.783344  | 1.449099  |
| 34 | 1 | 0 | -2.735413 | 1.042238  | 1.409258  |
| 35 | 1 | 0 | -1.043844 | 1.282520  | 1.833798  |
| 36 | 1 | 0 | -2.232854 | 2.538032  | 2.181760  |
| 37 | 6 | 0 | 3.042546  | 0.993785  | 0.900022  |
| 38 | 6 | 0 | 3.934614  | 0.557677  | -0.236483 |
| 39 | 1 | 0 | 4.313995  | -0.459255 | -0.132035 |
| 40 | 1 | 0 | 3.458305  | 0.661491  | -1.203997 |
| 41 | 1 | 0 | 4.801153  | 1.228720  | -0.242244 |
| 42 | 7 | 0 | 0.352581  | -0.267586 | -0.696256 |
| 43 | 6 | 0 | -0.970494 | -0.778143 | -0.424140 |
| 44 | 6 | 0 | 1.187351  | -1.412253 | -0.465580 |
| 45 | 6 | 0 | -0.867160 | -1.953250 | 0.356588  |
| 46 | 6 | 0 | -2.209836 | -0.364118 | -0.900094 |
| 47 | 6 | 0 | 0.530134  | -2.346872 | 0.334482  |
| 48 | 6 | 0 | 2.322243  | -1.819569 | -1.216010 |
| 49 | 6 | 0 | -2.008330 | -2.621773 | 0.790347  |
| 50 | 6 | 0 | -3.346070 | -1.056306 | -0.487876 |
| 51 | 1 | 0 | -2.301773 | 0.459466  | -1.590025 |
| 52 | 6 | 0 | 1.172653  | -3.536745 | 0.740230  |
| 53 | 6 | 0 | 2.974623  | -3.032438 | -0.808902 |
| 54 | 6 | 0 | 2.734154  | -1.202739 | -2.425529 |
| 55 | 1 | 0 | -1.935302 | -3.517810 | 1.393141  |
| 56 | 1 | 0 | -4.315789 | -0.755830 | -0.864178 |
| 57 | 6 | 0 | 2.410291  | -3.830236 | 0.226565  |
| 58 | 1 | 0 | 0.677649  | -4.222444 | 1.418323  |
| 59 | 6 | 0 | 4.114338  | -3.465394 | -1.533977 |
| 60 | 6 | 0 | 3.801718  | -1.690133 | -3.139331 |
| 61 | 1 | 0 | 2.176564  | -0.349815 | -2.791666 |
| 62 | 1 | 0 | 2.928727  | -4.734368 | 0.526396  |
| 63 | 6 | 0 | 4.526198  | -2.808368 | -2.668870 |
| 64 | 1 | 0 | 4.631787  | -4.358914 | -1.200588 |
| 65 | 1 | 0 | 4.088984  | -1.217908 | -4.071984 |
| 66 | 1 | 0 | 5.383090  | -3.168698 | -3.226492 |
| 67 | 6 | 0 | -3.253058 | -2.150497 | 0.379578  |
| 68 | 6 | 0 | -4.509133 | -2.808871 | 0.868861  |
| 69 | 9 | 0 | -4.298815 | -4.076542 | 1.288902  |
| 70 | 9 | 0 | -5.467086 | -2.858844 | -0.085080 |
| 71 | 9 | 0 | -5.051624 | -2.140458 | 1.918155  |

-----

Compound 8 1-RF-C1-TS

Method: b3lyp/6-311g(d,p)

SCF Done: E(RB3LYP) = -1731.98809746 A.U. after 1 cycles

Lowest frequency = -34.6072

Zero-point correction= 0.566304  
(Hartree/Particle)

Thermal correction to Energy= 0.601468  
 Thermal correction to Enthalpy= 0.602412  
 Thermal correction to Gibbs Free Energy= 0.498432  
 Sum of electronic and zero-point Energies= -1731.421793  
 Sum of electronic and thermal Energies= -1731.386629  
 Sum of electronic and thermal Enthalpies= -1731.385685  
 Sum of electronic and thermal Free Energies= -1731.489665

Standard orientation:

| Center<br>Number | Atomic<br>Number | Atomic<br>Type | Coordinates (Angstroms) |           |           |
|------------------|------------------|----------------|-------------------------|-----------|-----------|
|                  |                  |                | X                       | Y         | Z         |
| 1                | 6                | 0              | 1.236412                | 4.806537  | 3.153911  |
| 2                | 1                | 0              | 0.483619                | 5.489168  | 3.554345  |
| 3                | 1                | 0              | 1.516389                | 4.117350  | 3.958549  |
| 4                | 1                | 0              | 2.127472                | 5.385933  | 2.899775  |
| 5                | 6                | 0              | 0.715574                | 4.043143  | 1.965691  |
| 6                | 6                | 0              | -0.644519               | 3.870989  | 1.740762  |
| 7                | 1                | 0              | -1.355769               | 4.402502  | 2.366623  |
| 8                | 6                | 0              | -0.245191               | 2.297638  | -0.108957 |
| 9                | 6                | 0              | 1.569169                | 3.560047  | 0.973012  |
| 10               | 1                | 0              | 2.612523                | 3.863334  | 0.975639  |
| 11               | 6                | 0              | -4.143682               | 0.454891  | -2.354087 |
| 12               | 1                | 0              | -4.478636               | 0.498210  | -3.387031 |
| 13               | 6                | 0              | -5.077869               | 0.220093  | -1.340513 |
| 14               | 6                | 0              | -4.611711               | 0.167709  | -0.031595 |
| 15               | 1                | 0              | -5.316803               | -0.023900 | 0.772903  |
| 16               | 6                | 0              | -2.327281               | 0.594582  | -0.734793 |
| 17               | 6                | 0              | -6.543082               | 0.050608  | -1.663327 |
| 18               | 1                | 0              | -7.092651               | -0.360850 | -0.814170 |
| 19               | 1                | 0              | -7.003603               | 1.010154  | -1.922292 |
| 20               | 1                | 0              | -6.688880               | -0.617564 | -2.516762 |
| 21               | 6                | 0              | -2.791852               | 0.640913  | -2.073695 |
| 22               | 6                | 0              | -1.144186               | 3.084529  | 0.695507  |
| 23               | 6                | 0              | -2.623621               | 3.295669  | 0.417850  |
| 24               | 1                | 0              | -2.924352               | 2.969592  | -0.571931 |
| 25               | 1                | 0              | -3.278925               | 2.818058  | 1.146833  |
| 26               | 1                | 0              | -2.806602               | 4.372615  | 0.483789  |
| 27               | 6                | 0              | -1.832377               | 0.896277  | -3.217903 |
| 28               | 1                | 0              | -2.360083               | 0.933207  | -4.172891 |
| 29               | 1                | 0              | -1.303342               | 1.847315  | -3.094669 |
| 30               | 1                | 0              | -1.074244               | 0.109169  | -3.287862 |
| 31               | 6                | 0              | -3.261139               | 0.346578  | 0.287856  |
| 32               | 6                | 0              | -2.876397               | 0.254802  | 1.749559  |
| 33               | 1                | 0              | -2.990450               | -0.769315 | 2.114089  |
| 34               | 1                | 0              | -1.845835               | 0.557765  | 1.936159  |
| 35               | 1                | 0              | -3.525731               | 0.886348  | 2.363569  |
| 36               | 6                | 0              | 1.110297                | 2.772731  | -0.077358 |
| 37               | 6                | 0              | 2.028229                | 2.717106  | -1.279468 |
| 38               | 1                | 0              | 2.997153                | 2.265414  | -1.067708 |
| 39               | 1                | 0              | 1.574874                | 2.215888  | -2.127948 |
| 40               | 1                | 0              | 2.211079                | 3.751957  | -1.589558 |
| 41               | 5                | 0              | -0.772047               | 0.852356  | -0.541918 |
| 42               | 7                | 0              | 0.082277                | -0.393256 | -0.597898 |
| 43               | 6                | 0              | 1.496204                | -0.413368 | -0.741703 |
| 44               | 6                | 0              | -0.160549               | -1.421264 | 0.399242  |
| 45               | 6                | 0              | 2.099562                | -1.069464 | 0.351924  |
| 46               | 6                | 0              | 2.239456                | -0.125920 | -1.879603 |
| 47               | 6                | 0              | 1.019555                | -1.665979 | 1.110968  |

|    |   |   |           |           |           |
|----|---|---|-----------|-----------|-----------|
| 48 | 6 | 0 | -1.273754 | -2.295649 | 0.570613  |
| 49 | 6 | 0 | 3.480336  | -1.250612 | 0.393466  |
| 50 | 6 | 0 | 3.613247  | -0.342570 | -1.855815 |
| 51 | 1 | 0 | 1.759227  | 0.223487  | -2.783474 |
| 52 | 6 | 0 | 1.044587  | -2.534726 | 2.223179  |
| 53 | 6 | 0 | -1.238761 | -3.174797 | 1.710450  |
| 54 | 6 | 0 | -2.318398 | -2.468687 | -0.373704 |
| 55 | 1 | 0 | 3.956480  | -1.747465 | 1.228804  |
| 56 | 6 | 0 | 4.234332  | -0.857846 | -0.710451 |
| 57 | 1 | 0 | 4.206958  | -0.137178 | -2.737424 |
| 58 | 6 | 0 | -0.091642 | -3.223550 | 2.552074  |
| 59 | 1 | 0 | 1.958091  | -2.662173 | 2.792766  |
| 60 | 6 | 0 | -2.324152 | -4.061614 | 1.923357  |
| 61 | 6 | 0 | -3.322714 | -3.383031 | -0.161399 |
| 62 | 1 | 0 | -2.308640 | -1.885222 | -1.281473 |
| 63 | 1 | 0 | -0.105249 | -3.888038 | 3.408895  |
| 64 | 6 | 0 | -3.350370 | -4.161281 | 1.014976  |
| 65 | 1 | 0 | -2.307557 | -4.694700 | 2.804345  |
| 66 | 1 | 0 | -4.099140 | -3.506093 | -0.907414 |
| 67 | 1 | 0 | -4.161549 | -4.860940 | 1.182344  |
| 68 | 6 | 0 | 5.728857  | -0.995271 | -0.690336 |
| 69 | 9 | 0 | 6.335575  | 0.178709  | -0.380757 |
| 70 | 9 | 0 | 6.154367  | -1.899296 | 0.219307  |
| 71 | 9 | 0 | 6.224840  | -1.373668 | -1.890781 |

-----

Compound 8 1-RF-N-TS

Method: b3lyp/6-311g(d,p)

SCF Done: E(RB3LYP) = -1731.97331079 A.U. after 1 cycles

Lowest frequency = -70.0116

Zero-point correction= 0.567407  
(Hartree/Particle)  
Thermal correction to Energy= 0.602010  
Thermal correction to Enthalpy= 0.602955  
Thermal correction to Gibbs Free Energy= 0.500591  
Sum of electronic and zero-point Energies= -1731.405904  
Sum of electronic and thermal Energies= -1731.371300  
Sum of electronic and thermal Enthalpies= -1731.370356  
Sum of electronic and thermal Free Energies= -1731.472720

Standard orientation:

| Center<br>Number | Atomic<br>Number | Atomic<br>Type | Coordinates (Angstroms) |           |           |
|------------------|------------------|----------------|-------------------------|-----------|-----------|
|                  |                  |                | X                       | Y         | Z         |
| 1                | 5                | 0              | -0.837668               | 1.153345  | -0.237004 |
| 2                | 6                | 0              | -5.726780               | -1.113483 | -2.306098 |
| 3                | 1                | 0              | -5.640905               | -1.943987 | -3.010873 |
| 4                | 1                | 0              | -6.071061               | -1.530390 | -1.353010 |
| 5                | 1                | 0              | -6.500937               | -0.431928 | -2.665912 |
| 6                | 6                | 0              | -4.410892               | -0.410270 | -2.117541 |
| 7                | 6                | 0              | -3.195720               | -1.081358 | -2.231062 |
| 8                | 1                | 0              | -3.185565               | -2.103827 | -2.596878 |
| 9                | 6                | 0              | -1.934188               | 0.860658  | -1.372792 |
| 10               | 6                | 0              | -4.329671               | 0.967847  | -1.931457 |
| 11               | 1                | 0              | -5.217481               | 1.575706  | -2.084140 |
| 12               | 6                | 0              | 0.868263                | 4.551871  | 0.647119  |
| 13               | 1                | 0              | 0.839949                | 5.597730  | 0.353517  |

|    |   |   |           |           |           |
|----|---|---|-----------|-----------|-----------|
| 14 | 6 | 0 | 1.955043  | 4.082044  | 1.378436  |
| 15 | 6 | 0 | 1.793170  | 2.835015  | 1.978164  |
| 16 | 1 | 0 | 2.510956  | 2.508847  | 2.724917  |
| 17 | 6 | 0 | -0.236924 | 2.349657  | 0.655066  |
| 18 | 6 | 0 | 3.184785  | 4.918435  | 1.606486  |
| 19 | 1 | 0 | 3.605345  | 4.749823  | 2.600695  |
| 20 | 1 | 0 | 3.961935  | 4.660729  | 0.878205  |
| 21 | 1 | 0 | 2.973095  | 5.984320  | 1.496163  |
| 22 | 6 | 0 | -0.246666 | 3.758953  | 0.372632  |
| 23 | 6 | 0 | -1.979234 | -0.475516 | -1.925816 |
| 24 | 6 | 0 | -0.756469 | -1.249957 | -2.380865 |
| 25 | 1 | 0 | 0.126508  | -0.624888 | -2.476865 |
| 26 | 1 | 0 | -0.514595 | -2.100496 | -1.740713 |
| 27 | 1 | 0 | -0.976306 | -1.651605 | -3.374337 |
| 28 | 6 | 0 | -1.490614 | 4.542545  | 0.027425  |
| 29 | 1 | 0 | -1.582293 | 5.337493  | 0.773915  |
| 30 | 1 | 0 | -1.458559 | 5.032419  | -0.947852 |
| 31 | 1 | 0 | -2.383795 | 3.935988  | 0.104370  |
| 32 | 6 | 0 | 0.720707  | 1.997094  | 1.681663  |
| 33 | 6 | 0 | 0.580576  | 0.808112  | 2.614187  |
| 34 | 1 | 0 | -0.431313 | 0.414196  | 2.646633  |
| 35 | 1 | 0 | 1.265745  | -0.010502 | 2.382697  |
| 36 | 1 | 0 | 0.825509  | 1.151144  | 3.623551  |
| 37 | 6 | 0 | -3.122286 | 1.615243  | -1.672849 |
| 38 | 6 | 0 | -3.120170 | 3.087604  | -2.014028 |
| 39 | 1 | 0 | -3.745665 | 3.704752  | -1.365690 |
| 40 | 1 | 0 | -2.117177 | 3.492987  | -2.052045 |
| 41 | 1 | 0 | -3.533702 | 3.175203  | -3.023676 |
| 42 | 7 | 0 | -0.079869 | -0.136146 | 0.102259  |
| 43 | 6 | 0 | 1.258893  | -0.324151 | -0.232965 |
| 44 | 6 | 0 | -0.525483 | -1.322889 | 0.698605  |
| 45 | 6 | 0 | 1.663869  | -1.635078 | 0.118317  |
| 46 | 6 | 0 | 2.143591  | 0.548729  | -0.881247 |
| 47 | 6 | 0 | 0.518582  | -2.264508 | 0.717715  |
| 48 | 6 | 0 | -1.781769 | -1.613031 | 1.319768  |
| 49 | 6 | 0 | 2.964366  | -2.067334 | -0.157590 |
| 50 | 6 | 0 | 3.427590  | 0.104976  | -1.145886 |
| 51 | 1 | 0 | 1.842869  | 1.548539  | -1.166409 |
| 52 | 6 | 0 | 0.334072  | -3.552670 | 1.270882  |
| 53 | 6 | 0 | -1.942123 | -2.930790 | 1.868861  |
| 54 | 6 | 0 | -2.847396 | -0.691783 | 1.471605  |
| 55 | 1 | 0 | 3.286625  | -3.066792 | 0.104892  |
| 56 | 1 | 0 | 4.128030  | 0.764037  | -1.644162 |
| 57 | 6 | 0 | -0.876379 | -3.879161 | 1.815304  |
| 58 | 1 | 0 | 1.148334  | -4.268663 | 1.260644  |
| 59 | 6 | 0 | -3.169162 | -3.265144 | 2.492547  |
| 60 | 6 | 0 | -4.018956 | -1.046643 | 2.102047  |
| 61 | 1 | 0 | -2.748979 | 0.313774  | 1.085482  |
| 62 | 1 | 0 | -1.041632 | -4.863027 | 2.240197  |
| 63 | 6 | 0 | -4.189345 | -2.350166 | 2.608345  |
| 64 | 1 | 0 | -3.285472 | -4.266169 | 2.894844  |
| 65 | 1 | 0 | -4.813498 | -0.316789 | 2.207833  |
| 66 | 1 | 0 | -5.117479 | -2.625210 | 3.096615  |
| 67 | 6 | 0 | 3.839917  | -1.193452 | -0.785509 |
| 68 | 6 | 0 | 5.252186  | -1.600734 | -1.076269 |
| 69 | 9 | 0 | 5.594196  | -1.367939 | -2.367744 |
| 70 | 9 | 0 | 6.147658  | -0.911050 | -0.323870 |
| 71 | 9 | 0 | 5.476662  | -2.912247 | -0.839788 |

Compound 8 2-RF-CC-TS

Method: b3lyp/6-311g(d,p)

SCF Done: E(RB3LYP) = -1732.03573310 A.U. after 1 cycles

Lowest frequency = -50.0481

Zero-point correction= 0.567276  
(Hartree/Particle)  
Thermal correction to Energy= 0.602620  
Thermal correction to Enthalpy= 0.603565  
Thermal correction to Gibbs Free Energy= 0.498764  
Sum of electronic and zero-point Energies= -1731.468457  
Sum of electronic and thermal Energies= -1731.433113  
Sum of electronic and thermal Enthalpies= -1731.432169  
Sum of electronic and thermal Free Energies= -1731.536969

Standard orientation:

| Center<br>Number | Atomic<br>Number | Atomic<br>Type | Coordinates (Angstroms) |           |           |
|------------------|------------------|----------------|-------------------------|-----------|-----------|
|                  |                  |                | X                       | Y         | Z         |
| 1                | 5                | 0              | -0.743235               | 0.658319  | 0.291859  |
| 2                | 6                | 0              | -6.541423               | 1.309273  | -0.928222 |
| 3                | 1                | 0              | -6.898200               | 0.656432  | -1.728658 |
| 4                | 1                | 0              | -7.190693               | 1.169865  | -0.060560 |
| 5                | 1                | 0              | -6.668684               | 2.342730  | -1.269240 |
| 6                | 6                | 0              | -5.098604               | 1.028319  | -0.589351 |
| 7                | 6                | 0              | -4.197192               | 0.590898  | -1.554732 |
| 8                | 1                | 0              | -4.556076               | 0.391497  | -2.560731 |
| 9                | 6                | 0              | -2.328334               | 0.617884  | 0.021269  |
| 10               | 6                | 0              | -4.611943               | 1.172770  | 0.704983  |
| 11               | 1                | 0              | -5.300733               | 1.431224  | 1.505305  |
| 12               | 6                | 0              | 0.312667                | 4.422739  | 0.827542  |
| 13               | 1                | 0              | 0.314234                | 5.158258  | 1.627798  |
| 14               | 6                | 0              | 0.698135                | 4.812624  | -0.452355 |
| 15               | 6                | 0              | 0.806388                | 3.809063  | -1.408143 |
| 16               | 1                | 0              | 1.196380                | 4.054360  | -2.392621 |
| 17               | 6                | 0              | -0.061837               | 2.111175  | 0.123810  |
| 18               | 6                | 0              | 1.016661                | 6.251026  | -0.776048 |
| 19               | 1                | 0              | 1.745313                | 6.326645  | -1.586640 |
| 20               | 1                | 0              | 0.116224                | 6.787992  | -1.094484 |
| 21               | 1                | 0              | 1.418730                | 6.777214  | 0.093262  |
| 22               | 6                | 0              | -0.048499               | 3.108757  | 1.131554  |
| 23               | 6                | 0              | -2.844964               | 0.376782  | -1.278512 |
| 24               | 6                | 0              | -2.014913               | -0.161543 | -2.424351 |
| 25               | 1                | 0              | -1.629596               | 0.640597  | -3.057897 |
| 26               | 1                | 0              | -1.171494               | -0.763065 | -2.087646 |
| 27               | 1                | 0              | -2.632705               | -0.803251 | -3.056604 |
| 28               | 6                | 0              | -0.287195               | 2.813493  | 2.598956  |
| 29               | 1                | 0              | 0.461769                | 3.334094  | 3.202246  |
| 30               | 1                | 0              | -1.264911               | 3.159621  | 2.939983  |
| 31               | 1                | 0              | -0.203133               | 1.752542  | 2.832886  |
| 32               | 6                | 0              | 0.467439                | 2.479671  | -1.140289 |
| 33               | 6                | 0              | 0.823669                | 1.484609  | -2.227203 |
| 34               | 1                | 0              | 1.904800                | 1.512042  | -2.395140 |
| 35               | 1                | 0              | 0.569810                | 0.458194  | -1.981430 |
| 36               | 1                | 0              | 0.345090                | 1.733926  | -3.177956 |
| 37               | 6                | 0              | -3.269156               | 0.960808  | 1.024381  |
| 38               | 6                | 0              | -2.938620               | 0.990204  | 2.503572  |
| 39               | 1                | 0              | -1.932560               | 0.638537  | 2.724606  |



|    |   |   |           |           |           |
|----|---|---|-----------|-----------|-----------|
| 40 | 1 | 0 | -3.048262 | 1.990143  | 2.928899  |
| 41 | 1 | 0 | -3.631022 | 0.339637  | 3.047341  |
| 42 | 7 | 0 | 0.086187  | -0.515055 | 0.523537  |
| 43 | 6 | 0 | 1.517894  | -0.433106 | 0.502249  |
| 44 | 6 | 0 | -0.212930 | -1.893046 | 0.196009  |
| 45 | 6 | 0 | 2.054266  | -1.616948 | -0.034034 |
| 46 | 6 | 0 | 2.363372  | 0.579721  | 0.951989  |
| 47 | 6 | 0 | 0.948961  | -2.518388 | -0.259370 |
| 48 | 6 | 0 | -1.413658 | -2.652642 | 0.344914  |
| 49 | 6 | 0 | 3.430941  | -1.777081 | -0.186334 |
| 50 | 6 | 0 | 3.735744  | 0.410332  | 0.810163  |
| 51 | 1 | 0 | 1.982475  | 1.478519  | 1.407767  |
| 52 | 6 | 0 | 0.935594  | -3.826758 | -0.789773 |
| 53 | 6 | 0 | -1.420804 | -3.972385 | -0.230945 |
| 54 | 6 | 0 | -2.545398 | -2.260397 | 1.100278  |
| 55 | 1 | 0 | 3.845062  | -2.687974 | -0.598527 |
| 56 | 1 | 0 | 4.404928  | 1.182551  | 1.168034  |
| 57 | 6 | 0 | -0.244601 | -4.515572 | -0.819822 |
| 58 | 1 | 0 | 1.849612  | -4.267401 | -1.170565 |
| 59 | 6 | 0 | -2.597988 | -4.756836 | -0.138857 |
| 60 | 6 | 0 | -3.656348 | -3.063791 | 1.201408  |
| 61 | 1 | 0 | -2.522115 | -1.325135 | 1.628694  |
| 62 | 1 | 0 | -0.291109 | -5.512994 | -1.242681 |
| 63 | 6 | 0 | -3.700364 | -4.312680 | 0.549374  |
| 64 | 1 | 0 | -2.599368 | -5.737345 | -0.603137 |
| 65 | 1 | 0 | -4.502164 | -2.734337 | 1.793788  |
| 66 | 1 | 0 | -4.588144 | -4.930789 | 0.619223  |
| 67 | 6 | 0 | 4.268122  | -0.750464 | 0.232701  |
| 68 | 6 | 0 | 5.754410  | -0.859342 | 0.050501  |
| 69 | 9 | 0 | 6.186377  | -0.136245 | -1.011969 |
| 70 | 9 | 0 | 6.156909  | -2.132257 | -0.158547 |
| 71 | 9 | 0 | 6.433654  | -0.397671 | 1.125710  |

-----

Compound 8 2-RF-CN-TS

Method: b3lyp/6-311g(d,p)

SCF Done: E(RB3LYP) = -1732.03327168 A.U. after 1 cycles

Lowest frequency = -27.4288

Zero-point correction= 0.567331  
(Hartree/Particle)  
Thermal correction to Energy= 0.602560  
Thermal correction to Enthalpy= 0.603504  
Thermal correction to Gibbs Free Energy= 0.498703  
Sum of electronic and zero-point Energies= -1731.465941  
Sum of electronic and thermal Energies= -1731.430712  
Sum of electronic and thermal Enthalpies= -1731.429768  
Sum of electronic and thermal Free Energies= -1731.534569

Standard orientation:

-----

| Center<br>Number | Atomic<br>Number | Atomic<br>Type | Coordinates (Angstroms) |           |           |
|------------------|------------------|----------------|-------------------------|-----------|-----------|
|                  |                  |                | X                       | Y         | Z         |
| 1                | 5                | 0              | 1.101922                | -0.475478 | 0.217850  |
| 2                | 6                | 0              | 4.538624                | -4.533302 | -2.423072 |
| 3                | 1                | 0              | 4.021772                | -5.023007 | -3.251041 |
| 4                | 1                | 0              | 5.439487                | -4.062059 | -2.831765 |
| 5                | 1                | 0              | 4.863671                | -5.299714 | -1.716123 |

-----

|    |   |   |           |           |           |
|----|---|---|-----------|-----------|-----------|
| 6  | 6 | 0 | 3.661616  | -3.506131 | -1.756436 |
| 7  | 6 | 0 | 2.674384  | -2.830496 | -2.467584 |
| 8  | 1 | 0 | 2.532727  | -3.068607 | -3.516783 |
| 9  | 6 | 0 | 2.012407  | -1.521294 | -0.495846 |
| 10 | 6 | 0 | 3.833696  | -3.172001 | -0.416295 |
| 11 | 1 | 0 | 4.605700  | -3.678233 | 0.154206  |
| 12 | 6 | 0 | 1.666349  | 1.470071  | 3.592091  |
| 13 | 1 | 0 | 2.222311  | 2.336555  | 3.939883  |
| 14 | 6 | 0 | 0.841126  | 0.791177  | 4.483238  |
| 15 | 6 | 0 | 0.223842  | -0.365690 | 4.017583  |
| 16 | 1 | 0 | -0.370087 | -0.963151 | 4.704137  |
| 17 | 6 | 0 | 1.128190  | -0.060977 | 1.768003  |
| 18 | 6 | 0 | 0.639753  | 1.276794  | 5.897313  |
| 19 | 1 | 0 | -0.216114 | 1.958126  | 5.957708  |
| 20 | 1 | 0 | 0.444317  | 0.447252  | 6.581172  |
| 21 | 1 | 0 | 1.514976  | 1.819885  | 6.262000  |
| 22 | 6 | 0 | 1.829133  | 1.063810  | 2.265379  |
| 23 | 6 | 0 | 1.859658  | -1.857176 | -1.889168 |
| 24 | 6 | 0 | 0.862434  | -1.226787 | -2.843205 |
| 25 | 1 | 0 | -0.170257 | -1.464344 | -2.585548 |
| 26 | 1 | 0 | 0.940592  | -0.140959 | -2.877363 |
| 27 | 1 | 0 | 1.042496  | -1.603743 | -3.851462 |
| 28 | 6 | 0 | 2.833100  | 1.838590  | 1.440767  |
| 29 | 1 | 0 | 3.661008  | 2.170181  | 2.072940  |
| 30 | 1 | 0 | 3.258666  | 1.239646  | 0.634917  |
| 31 | 1 | 0 | 2.394026  | 2.729745  | 0.987919  |
| 32 | 6 | 0 | 0.360085  | -0.805752 | 2.699023  |
| 33 | 6 | 0 | -0.286850 | -2.136104 | 2.367143  |
| 34 | 1 | 0 | -1.353529 | -2.030436 | 2.158862  |
| 35 | 1 | 0 | 0.174470  | -2.622106 | 1.505811  |
| 36 | 1 | 0 | -0.187449 | -2.819264 | 3.214973  |
| 37 | 6 | 0 | 3.054007  | -2.208971 | 0.221631  |
| 38 | 6 | 0 | 3.404680  | -1.966508 | 1.674876  |
| 39 | 1 | 0 | 3.647597  | -0.923278 | 1.874587  |
| 40 | 1 | 0 | 2.590778  | -2.230608 | 2.350424  |
| 41 | 1 | 0 | 4.272522  | -2.570234 | 1.945865  |
| 42 | 7 | 0 | -0.041371 | 0.193702  | -0.555131 |
| 43 | 6 | 0 | -1.341840 | -0.319191 | -0.479365 |
| 44 | 6 | 0 | -0.178748 | 1.568527  | -0.814873 |
| 45 | 6 | 0 | -2.286319 | 0.735048  | -0.568624 |
| 46 | 6 | 0 | -1.769690 | -1.650804 | -0.424399 |
| 47 | 6 | 0 | -1.530468 | 1.941589  | -0.769737 |
| 48 | 6 | 0 | 0.811133  | 2.485381  | -1.283230 |
| 49 | 6 | 0 | -3.654771 | 0.458927  | -0.539526 |
| 50 | 6 | 0 | -3.131100 | -1.909919 | -0.410897 |
| 51 | 1 | 0 | -1.063649 | -2.470065 | -0.416052 |
| 52 | 6 | 0 | -1.921900 | 3.282974  | -0.983620 |
| 53 | 6 | 0 | 0.393310  | 3.844171  | -1.484378 |
| 54 | 6 | 0 | 2.127702  | 2.122720  | -1.660041 |
| 55 | 1 | 0 | -4.384258 | 1.255886  | -0.604859 |
| 56 | 1 | 0 | -3.479663 | -2.935071 | -0.387379 |
| 57 | 6 | 0 | -0.970378 | 4.217320  | -1.290016 |
| 58 | 1 | 0 | -2.966867 | 3.562155  | -0.908746 |
| 59 | 6 | 0 | 1.346089  | 4.784837  | -1.947765 |
| 60 | 6 | 0 | 3.014811  | 3.056535  | -2.145223 |
| 61 | 1 | 0 | 2.441391  | 1.089906  | -1.574584 |
| 62 | 1 | 0 | -1.248369 | 5.253526  | -1.447432 |
| 63 | 6 | 0 | 2.629466  | 4.406849  | -2.268134 |
| 64 | 1 | 0 | 1.033261  | 5.816055  | -2.074355 |
| 65 | 1 | 0 | 4.013351  | 2.751145  | -2.436577 |

|    |   |   |           |           |           |
|----|---|---|-----------|-----------|-----------|
| 66 | 1 | 0 | 3.337971  | 5.139760  | -2.637020 |
| 67 | 6 | 0 | -4.070082 | -0.863042 | -0.452040 |
| 68 | 6 | 0 | -5.528445 | -1.203994 | -0.388878 |
| 69 | 9 | 0 | -6.322372 | -0.153393 | -0.691481 |
| 70 | 9 | 0 | -5.854645 | -2.206193 | -1.241344 |
| 71 | 9 | 0 | -5.898857 | -1.627808 | 0.846178  |

-----

Compound 8 3-RF-TS

Method: b3lyp/6-311g(d,p)

SCF Done: E(RB3LYP) = -1731.99165001 A.U. after 1 cycles

Lowest frequency = -23.8076

Zero-point correction= 0.567568  
(Hartree/Particle)  
Thermal correction to Energy= 0.602598  
Thermal correction to Enthalpy= 0.603542  
Thermal correction to Gibbs Free Energy= 0.499247  
Sum of electronic and zero-point Energies= -1731.424082  
Sum of electronic and thermal Energies= -1731.389052  
Sum of electronic and thermal Enthalpies= -1731.388108  
Sum of electronic and thermal Free Energies= -1731.492403

Standard orientation:

| Center<br>Number | Atomic<br>Number | Atomic<br>Type | Coordinates (Angstroms) |           |           |
|------------------|------------------|----------------|-------------------------|-----------|-----------|
|                  |                  |                | X                       | Y         | Z         |
| 1                | 5                | 0              | 1.000209                | 0.585985  | 0.283865  |
| 2                | 6                | 0              | 1.252638                | -2.299285 | 5.541480  |
| 3                | 1                | 0              | 1.529188                | -1.620768 | 6.353785  |
| 4                | 1                | 0              | 0.255586                | -2.689200 | 5.771638  |
| 5                | 1                | 0              | 1.949024                | -3.140163 | 5.551343  |
| 6                | 6                | 0              | 1.262728                | -1.592238 | 4.209633  |
| 7                | 6                | 0              | 0.592793                | -0.385796 | 4.024023  |
| 8                | 1                | 0              | 0.063158                | 0.060848  | 4.860361  |
| 9                | 6                | 0              | 1.238657                | -0.255002 | 1.649417  |
| 10               | 6                | 0              | 1.931576                | -2.101565 | 3.110689  |
| 11               | 1                | 0              | 2.488126                | -3.028910 | 3.215532  |
| 12               | 6                | 0              | 3.781911                | 2.997815  | -0.896852 |
| 13               | 1                | 0              | 4.833717                | 2.868372  | -1.134175 |
| 14               | 6                | 0              | 3.179871                | 4.227510  | -1.136467 |
| 15               | 6                | 0              | 1.865755                | 4.361281  | -0.715988 |
| 16               | 1                | 0              | 1.383796                | 5.331452  | -0.800034 |
| 17               | 6                | 0              | 1.698715                | 2.010086  | -0.025973 |
| 18               | 6                | 0              | 3.927243                | 5.360676  | -1.792295 |
| 19               | 1                | 0              | 3.890884                | 5.271679  | -2.883653 |
| 20               | 1                | 0              | 3.497008                | 6.329204  | -1.527983 |
| 21               | 1                | 0              | 4.980829                | 5.364819  | -1.501780 |
| 22               | 6                | 0              | 3.094235                | 1.918583  | -0.340010 |
| 23               | 6                | 0              | 0.576856                | 0.280467  | 2.801630  |
| 24               | 6                | 0              | -0.192662               | 1.578845  | 2.777863  |
| 25               | 1                | 0              | 0.441753                | 2.412857  | 2.479276  |
| 26               | 1                | 0              | -1.048525               | 1.534658  | 2.100074  |
| 27               | 1                | 0              | -0.587077               | 1.803976  | 3.770056  |
| 28               | 6                | 0              | 3.939471                | 0.690475  | -0.077204 |
| 29               | 1                | 0              | 3.742005                | 0.265689  | 0.905394  |
| 30               | 1                | 0              | 3.789705                | -0.093674 | -0.821636 |
| 31               | 1                | 0              | 4.996592                | 0.959418  | -0.113825 |

|    |   |   |           |           |           |
|----|---|---|-----------|-----------|-----------|
| 32 | 6 | 0 | 1.130030  | 3.310845  | -0.152555 |
| 33 | 6 | 0 | -0.201055 | 3.776197  | 0.413828  |
| 34 | 1 | 0 | -0.731676 | 4.401807  | -0.309669 |
| 35 | 1 | 0 | -0.868432 | 2.988056  | 0.727695  |
| 36 | 1 | 0 | -0.011036 | 4.405939  | 1.289873  |
| 37 | 6 | 0 | 1.934408  | -1.475567 | 1.855161  |
| 38 | 6 | 0 | 2.781558  | -2.208514 | 0.837216  |
| 39 | 1 | 0 | 2.829234  | -1.733074 | -0.129406 |
| 40 | 1 | 0 | 3.807489  | -2.301576 | 1.208680  |
| 41 | 1 | 0 | 2.401566  | -3.221749 | 0.684261  |
| 42 | 7 | 0 | 0.047935  | -0.014677 | -0.762599 |
| 43 | 6 | 0 | -1.331643 | 0.351557  | -0.672333 |
| 44 | 6 | 0 | 0.000240  | -1.421147 | -0.981317 |
| 45 | 6 | 0 | -2.130215 | -0.806437 | -0.485887 |
| 46 | 6 | 0 | -1.940052 | 1.581434  | -0.899909 |
| 47 | 6 | 0 | -1.260246 | -1.943566 | -0.693868 |
| 48 | 6 | 0 | 0.950841  | -2.192419 | -1.700678 |
| 49 | 6 | 0 | -3.513491 | -0.699229 | -0.357905 |
| 50 | 6 | 0 | -3.323115 | 1.678922  | -0.788122 |
| 51 | 1 | 0 | -1.361995 | 2.428306  | -1.228437 |
| 52 | 6 | 0 | -1.518360 | -3.326091 | -0.831785 |
| 53 | 6 | 0 | 0.684498  | -3.594806 | -1.835563 |
| 54 | 6 | 0 | 2.057323  | -1.635265 | -2.390480 |
| 55 | 1 | 0 | -4.128327 | -1.578086 | -0.212266 |
| 56 | 1 | 0 | -3.809189 | 2.626540  | -0.982911 |
| 57 | 6 | 0 | -0.537439 | -4.137907 | -1.341041 |
| 58 | 1 | 0 | -2.485617 | -3.732636 | -0.559391 |
| 59 | 6 | 0 | 1.621106  | -4.394386 | -2.538086 |
| 60 | 6 | 0 | 2.920425  | -2.437465 | -3.099443 |
| 61 | 1 | 0 | 2.191705  | -0.560377 | -2.379656 |
| 62 | 1 | 0 | -0.710754 | -5.203008 | -1.449264 |
| 63 | 6 | 0 | 2.720020  | -3.834886 | -3.146965 |
| 64 | 1 | 0 | 1.437979  | -5.461108 | -2.615041 |
| 65 | 1 | 0 | 3.751548  | -1.995069 | -3.636952 |
| 66 | 1 | 0 | 3.415873  | -4.460053 | -3.694689 |
| 67 | 6 | 0 | -4.102387 | 0.555822  | -0.480092 |
| 68 | 6 | 0 | -5.583255 | 0.717396  | -0.299758 |
| 69 | 9 | 0 | -5.895148 | 1.162178  | 0.943153  |
| 70 | 9 | 0 | -6.108843 | 1.614362  | -1.166279 |
| 71 | 9 | 0 | -6.254298 | -0.443139 | -0.472488 |

---

Compound 2a n-Hexane

Step1

Method: cam-b3lyp/6-31G(d)

Solvent : n-Hexane

SCF Done: E(RCAM-B3LYP) = -1358.10338799 a.u.

Lowest frequency = 20.3334

Standard orientation:

| Center<br>Number | Atomic<br>Number | Atomic<br>Type | Coordinates (Angstroms) |           |           |
|------------------|------------------|----------------|-------------------------|-----------|-----------|
|                  |                  |                | X                       | Y         | Z         |
| 1                | 5                | 0              | 0.938283                | 0.255300  | -0.063468 |
| 2                | 6                | 0              | 3.317164                | 0.884628  | -1.877083 |
| 3                | 1                | 0              | 2.720070                | 0.325925  | -2.606748 |
| 4                | 1                | 0              | 2.808261                | 1.835680  | -1.703234 |
| 5                | 1                | 0              | 4.282102                | 1.097397  | -2.344467 |
| 6                | 6                | 0              | 1.478186                | 2.262785  | 2.177871  |
| 7                | 1                | 0              | 1.686904                | 3.120118  | 2.823046  |
| 8                | 1                | 0              | 0.767546                | 1.621317  | 2.711225  |
| 9                | 1                | 0              | 2.403449                | 1.693364  | 2.061865  |
| 10               | 6                | 0              | -0.325091               | 1.406845  | -2.532172 |
| 11               | 1                | 0              | 0.413701                | 0.626636  | -2.731032 |
| 12               | 1                | 0              | -1.276893               | 0.903380  | -2.333231 |
| 13               | 1                | 0              | -0.446191               | 1.989675  | -3.449154 |
| 14               | 6                | 0              | -0.071468               | 6.056878  | -0.700805 |
| 15               | 1                | 0              | -0.292097               | 6.551787  | 0.249259  |
| 16               | 1                | 0              | 0.821192                | 6.537264  | -1.118490 |
| 17               | 1                | 0              | -0.898671               | 6.254165  | -1.388587 |
| 18               | 6                | 0              | 0.147355                | 4.578737  | -0.513148 |
| 19               | 6                | 0              | 0.674725                | 4.075028  | 0.671220  |
| 20               | 1                | 0              | 0.903440                | 4.761196  | 1.483408  |
| 21               | 6                | 0              | 0.925392                | 2.715794  | 0.847248  |
| 22               | 6                | 0              | 0.619469                | 1.800487  | -0.182198 |
| 23               | 6                | 0              | 0.066527                | 2.305462  | -1.380578 |
| 24               | 6                | 0              | -0.147177               | 3.674244  | -1.527611 |
| 25               | 1                | 0              | -0.562367               | 4.043700  | -2.462595 |
| 26               | 6                | 0              | 2.667974                | -1.016607 | 1.381772  |
| 27               | 6                | 0              | 3.971997                | -1.396799 | 1.690771  |
| 28               | 1                | 0              | 4.149760                | -1.979370 | 2.591958  |
| 29               | 6                | 0              | 5.049430                | -1.060454 | 0.878148  |
| 30               | 6                | 0              | 4.789178                | -0.317253 | -0.268206 |
| 31               | 1                | 0              | 5.613655                | -0.050736 | -0.925438 |
| 32               | 6                | 0              | 3.502133                | 0.102562  | -0.598239 |
| 33               | 6                | 0              | 2.410850                | -0.245844 | 0.225487  |
| 34               | 6                | 0              | 1.566339                | -1.470034 | 2.313407  |
| 35               | 1                | 0              | 1.027503                | -2.328134 | 1.898148  |
| 36               | 1                | 0              | 1.981545                | -1.777272 | 3.276961  |
| 37               | 1                | 0              | 0.825516                | -0.690163 | 2.505586  |
| 38               | 6                | 0              | 6.453912                | -1.463927 | 1.242339  |
| 39               | 1                | 0              | 7.081223                | -1.573639 | 0.353210  |
| 40               | 1                | 0              | 6.926346                | -0.710538 | 1.883651  |
| 41               | 1                | 0              | 6.468423                | -2.411059 | 1.789230  |
| 42               | 7                | 0              | -0.124992               | -0.704642 | -0.218864 |
| 43               | 6                | 0              | -0.006193               | -2.050466 | -0.658630 |
| 44               | 6                | 0              | -1.507931               | -0.497544 | 0.036667  |
| 45               | 6                | 0              | -1.271703               | -2.660372 | -0.681816 |
| 46               | 6                | 0              | 1.118330                | -2.747701 | -1.098676 |

|    |   |   |           |           |           |
|----|---|---|-----------|-----------|-----------|
| 47 | 6 | 0 | -2.226901 | -1.671802 | -0.226398 |
| 48 | 6 | 0 | -1.420683 | -3.977150 | -1.110875 |
| 49 | 6 | 0 | 0.954724  | -4.060822 | -1.520213 |
| 50 | 1 | 0 | 2.097486  | -2.289997 | -1.114840 |
| 51 | 6 | 0 | -3.603384 | -1.728945 | -0.017973 |
| 52 | 6 | 0 | -0.299451 | -4.678164 | -1.524856 |
| 53 | 1 | 0 | -2.402190 | -4.441534 | -1.125583 |
| 54 | 1 | 0 | 1.825148  | -4.614725 | -1.857983 |
| 55 | 6 | 0 | -4.280256 | -0.617053 | 0.464507  |
| 56 | 1 | 0 | -4.147174 | -2.646665 | -0.227136 |
| 57 | 1 | 0 | -0.394423 | -5.705325 | -1.862264 |
| 58 | 6 | 0 | -3.539420 | 0.543205  | 0.742033  |
| 59 | 1 | 0 | -4.050864 | 1.418825  | 1.131396  |
| 60 | 6 | 0 | -2.168662 | 0.620334  | 0.545155  |
| 61 | 1 | 0 | -1.639138 | 1.532319  | 0.783259  |
| 62 | 6 | 0 | -5.780107 | -0.660395 | 0.693810  |
| 63 | 1 | 0 | -6.118794 | -1.665186 | 0.412241  |
| 64 | 6 | 0 | -6.138263 | -0.449099 | 2.169545  |
| 65 | 1 | 0 | -7.218748 | -0.541606 | 2.322061  |
| 66 | 1 | 0 | -5.638488 | -1.184241 | 2.807342  |
| 67 | 1 | 0 | -5.839130 | 0.547660  | 2.511008  |
| 68 | 6 | 0 | -6.520437 | 0.343483  | -0.197783 |
| 69 | 1 | 0 | -6.234399 | 1.372785  | 0.043714  |
| 70 | 1 | 0 | -6.296068 | 0.174363  | -1.255173 |
| 71 | 1 | 0 | -7.603457 | 0.258378  | -0.059546 |

-----

Step2

Method: cam-b3lyp/6-31+G(d,p) TD(NStates=3) SCRF(solvent=n-hexane)

Excited State 1: Singlet-A 4.2783 eV 289.79 nm f=0.3186  
 <S\*\*2>=0.000  
 119 ->124 -0.10058  
 122 ->124 0.16949  
 123 ->124 0.64227

Step3

Method: cam-b3lyp/6-31+G(d,p) SCRF(Solvent=n-hexane,NonEquilibrium=Save)  
 SCF Done: E(RCAM-B3LYP) = -1358.19002814 a.u.

Step4

Method: CAM-B3LYP/6-31+G(d,p) TD(NStates=1,Root=1)  
 SCRF(Solvent=n-hexane,ExternalIteration,NonEquilibrium=Read)

After PCM corrections, the energy is -1358.03303577 a.u.

Excited State 1: Singlet-A 4.2767 eV 289.91 nm f=0.2498  
 <S\*\*2>=0.000  
 122 ->124 0.19452  
 123 ->124 0.63593

Step5

Method: cam-b3lyp/6-31G(d) opt freq(savenormalmodes)  
 TD(NStates=1,Root=1)

Total Energy, E(TD-HF/TD-DFT) = -1357.97171210 a.u.

Lowest frequency = 19.8580

Standard orientation:

| Center<br>Number | Atomic<br>Number | Atomic<br>Type | Coordinates (Angstroms) |           |           |
|------------------|------------------|----------------|-------------------------|-----------|-----------|
|                  |                  |                | X                       | Y         | Z         |
| 1                | 5                | 0              | 1.032813                | 0.291551  | -0.058904 |
| 2                | 6                | 0              | 3.856180                | 0.951116  | -0.870270 |
| 3                | 1                | 0              | 3.209659                | 0.862833  | -1.749921 |
| 4                | 1                | 0              | 3.674015                | 1.949480  | -0.461330 |
| 5                | 1                | 0              | 4.897841                | 0.911207  | -1.202213 |
| 6                | 6                | 0              | 2.005725                | 2.313922  | 1.948941  |
| 7                | 1                | 0              | 2.099388                | 3.156412  | 2.640501  |
| 8                | 1                | 0              | 1.420500                | 1.527991  | 2.438345  |
| 9                | 1                | 0              | 3.004615                | 1.894432  | 1.796041  |
| 10               | 6                | 0              | -0.194584               | 1.498486  | -2.609224 |
| 11               | 1                | 0              | 0.573492                | 0.766885  | -2.884351 |
| 12               | 1                | 0              | -1.101406               | 0.932344  | -2.368619 |
| 13               | 1                | 0              | -0.418241               | 2.100588  | -3.494466 |
| 14               | 6                | 0              | 0.346573                | 6.133834  | -0.812772 |
| 15               | 1                | 0              | -0.506255               | 6.490152  | -0.221481 |
| 16               | 1                | 0              | 1.224240                | 6.697156  | -0.479526 |
| 17               | 1                | 0              | 0.152197                | 6.399608  | -1.856072 |
| 18               | 6                | 0              | 0.549392                | 4.650207  | -0.653820 |
| 19               | 6                | 0              | 1.179003                | 4.123647  | 0.472463  |
| 20               | 1                | 0              | 1.533538                | 4.805611  | 1.243236  |
| 21               | 6                | 0              | 1.357784                | 2.757421  | 0.659445  |
| 22               | 6                | 0              | 0.891472                | 1.823764  | -0.315769 |
| 23               | 6                | 0              | 0.262467                | 2.372147  | -1.469113 |
| 24               | 6                | 0              | 0.103127                | 3.747760  | -1.612208 |
| 25               | 1                | 0              | -0.369708               | 4.128641  | -2.515562 |
| 26               | 6                | 0              | 2.123137                | -1.568577 | 1.447477  |
| 27               | 6                | 0              | 3.243956                | -2.260884 | 1.897937  |
| 28               | 1                | 0              | 3.106067                | -3.075108 | 2.606923  |
| 29               | 6                | 0              | 4.531874                | -1.932736 | 1.491430  |
| 30               | 6                | 0              | 4.667402                | -0.865186 | 0.606090  |
| 31               | 1                | 0              | 5.663222                | -0.589889 | 0.263473  |
| 32               | 6                | 0              | 3.577041                | -0.146634 | 0.128138  |
| 33               | 6                | 0              | 2.250208                | -0.483556 | 0.535248  |
| 34               | 6                | 0              | 0.785518                | -1.973258 | 2.012111  |
| 35               | 1                | 0              | 0.161598                | -2.496787 | 1.278931  |
| 36               | 1                | 0              | 0.911562                | -2.646690 | 2.864625  |
| 37               | 1                | 0              | 0.214999                | -1.101529 | 2.352115  |
| 38               | 6                | 0              | 5.731408                | -2.707606 | 1.969293  |
| 39               | 1                | 0              | 6.081084                | -3.418325 | 1.210109  |
| 40               | 1                | 0              | 6.572480                | -2.045074 | 2.198339  |
| 41               | 1                | 0              | 5.500529                | -3.282388 | 2.871044  |
| 42               | 7                | 0              | -0.189359               | -0.567324 | -0.445715 |
| 43               | 6                | 0              | -0.206748               | -1.611244 | -1.361557 |
| 44               | 6                | 0              | -1.459993               | -0.444716 | 0.061771  |
| 45               | 6                | 0              | -1.502180               | -2.173660 | -1.445871 |
| 46               | 6                | 0              | 0.862737                | -2.107703 | -2.099939 |
| 47               | 6                | 0              | -2.327692               | -1.404952 | -0.517024 |
| 48               | 6                | 0              | -1.734604               | -3.235881 | -2.291989 |
| 49               | 6                | 0              | 0.606513                | -3.178978 | -2.957882 |
| 50               | 1                | 0              | 1.853024                | -1.684262 | -1.992447 |
| 51               | 6                | 0              | -3.652522               | -1.441292 | -0.147796 |
| 52               | 6                | 0              | -0.664915               | -3.733368 | -3.054045 |
| 53               | 1                | 0              | -2.718948               | -3.685995 | -2.372431 |

|    |   |   |           |           |           |
|----|---|---|-----------|-----------|-----------|
| 54 | 1 | 0 | 1.416250  | -3.589042 | -3.551534 |
| 55 | 6 | 0 | -4.138641 | -0.522414 | 0.804364  |
| 56 | 1 | 0 | -4.332081 | -2.168946 | -0.582025 |
| 57 | 1 | 0 | -0.835025 | -4.570291 | -3.722982 |
| 58 | 6 | 0 | -3.263833 | 0.422360  | 1.356057  |
| 59 | 1 | 0 | -3.642499 | 1.135444  | 2.080713  |
| 60 | 6 | 0 | -1.924554 | 0.486592  | 0.996098  |
| 61 | 1 | 0 | -1.259234 | 1.237096  | 1.402777  |
| 62 | 6 | 0 | -5.597627 | -0.558981 | 1.211454  |
| 63 | 1 | 0 | -6.068292 | -1.378315 | 0.655349  |
| 64 | 6 | 0 | -5.759126 | -0.859777 | 2.707121  |
| 65 | 1 | 0 | -6.819622 | -0.942624 | 2.964561  |
| 66 | 1 | 0 | -5.266627 | -1.797436 | 2.980518  |
| 67 | 1 | 0 | -5.328775 | -0.062465 | 3.321578  |
| 68 | 6 | 0 | -6.322688 | 0.738114  | 0.829401  |
| 69 | 1 | 0 | -5.912139 | 1.596535  | 1.370682  |
| 70 | 1 | 0 | -6.234757 | 0.943343  | -0.241394 |
| 71 | 1 | 0 | -7.386114 | 0.665098  | 1.077674  |

#### Step6

Method: cam-b3lyp/6-31+G(d,p) TD(NStates=1, Root=1)  
 SCRF(Solvent=n-hexane,ExternalIteration,NonEquilibrium=Save)  
 After PCM corrections, the energy is -1358.06563674 a.u.

Excited State 1: Singlet-A 2.9187 eV 424.80 nm f=0.0397  
 <S\*\*2>=0.000  
 115 ->124 -0.11169  
 123 ->124 0.68276

#### Step7

Method: cam-b3lyp/6-31+G(d,p) SCRF(Solvent=n-hexane,  
 NonEquilibrium=Read)

SCF Done: E(RCAM-B3LYP) = -1358.17156600 a.u.

#### Results

|                 |   |            |          |            |
|-----------------|---|------------|----------|------------|
| Absorb Energy   | = | 0.157 a.u. | 4.272 eV | 290.226 nm |
| Emission Energy | = | 0.106 a.u. | 2.882 eV | 430.130 nm |
| Stokes Shift    | = | 0.051 a.u. | 1.389 eV | 139.903 nm |

#### Compound 2a THF

#### Step1

Method: cam-b3lyp/6-31G(d)  
 Solvent : TetraHydroFuran  
 SCF Done: E(RCAM-B3LYP) = -1358.10645336 a.u.  
 Lowest frequency = 20.6874

#### Standard orientation:

| Center Number | Atomic Number | Atomic Type | Coordinates (Angstroms) |   |   |
|---------------|---------------|-------------|-------------------------|---|---|
|               |               |             | X                       | Y | Z |



|    |   |   |           |           |           |
|----|---|---|-----------|-----------|-----------|
| 1  | 5 | 0 | 0.940160  | 0.260451  | -0.062873 |
| 2  | 6 | 0 | 3.323363  | 0.869981  | -1.883050 |
| 3  | 1 | 0 | 2.760477  | 0.285972  | -2.620232 |
| 4  | 1 | 0 | 2.779871  | 1.804831  | -1.727619 |
| 5  | 1 | 0 | 4.290501  | 1.110614  | -2.331811 |
| 6  | 6 | 0 | 1.446709  | 2.274545  | 2.184600  |
| 7  | 1 | 0 | 1.675824  | 3.134918  | 2.818564  |
| 8  | 1 | 0 | 0.717953  | 1.659140  | 2.724339  |
| 9  | 1 | 0 | 2.356926  | 1.679574  | 2.078923  |
| 10 | 6 | 0 | -0.307397 | 1.402022  | -2.541200 |
| 11 | 1 | 0 | 0.446683  | 0.636971  | -2.742134 |
| 12 | 1 | 0 | -1.249359 | 0.879835  | -2.343559 |
| 13 | 1 | 0 | -0.439944 | 1.984817  | -3.456488 |
| 14 | 6 | 0 | -0.097235 | 6.056894  | -0.713124 |
| 15 | 1 | 0 | -0.332902 | 6.550355  | 0.233994  |
| 16 | 1 | 0 | 0.797880  | 6.542663  | -1.119067 |
| 17 | 1 | 0 | -0.916068 | 6.248152  | -1.412381 |
| 18 | 6 | 0 | 0.129043  | 4.580256  | -0.522120 |
| 19 | 6 | 0 | 0.650682  | 4.080833  | 0.666981  |
| 20 | 1 | 0 | 0.869147  | 4.769218  | 1.480065  |
| 21 | 6 | 0 | 0.907344  | 2.722737  | 0.846847  |
| 22 | 6 | 0 | 0.615369  | 1.804380  | -0.184069 |
| 23 | 6 | 0 | 0.068062  | 2.304877  | -1.387340 |
| 24 | 6 | 0 | -0.152980 | 3.672369  | -1.537862 |
| 25 | 1 | 0 | -0.563099 | 4.038355  | -2.476383 |
| 26 | 6 | 0 | 2.667483  | -1.003024 | 1.391157  |
| 27 | 6 | 0 | 3.970636  | -1.383428 | 1.704576  |
| 28 | 1 | 0 | 4.146432  | -1.960198 | 2.609822  |
| 29 | 6 | 0 | 5.050231  | -1.053174 | 0.891306  |
| 30 | 6 | 0 | 4.792364  | -0.316784 | -0.260351 |
| 31 | 1 | 0 | 5.618010  | -0.055668 | -0.918226 |
| 32 | 6 | 0 | 3.505754  | 0.102123  | -0.595287 |
| 33 | 6 | 0 | 2.412880  | -0.238667 | 0.229618  |
| 34 | 6 | 0 | 1.563438  | -1.447271 | 2.324609  |
| 35 | 1 | 0 | 1.013303  | -2.297800 | 1.908471  |
| 36 | 1 | 0 | 1.977962  | -1.762419 | 3.285766  |
| 37 | 1 | 0 | 0.832652  | -0.659018 | 2.521459  |
| 38 | 6 | 0 | 6.453722  | -1.456174 | 1.260034  |
| 39 | 1 | 0 | 7.081413  | -1.573896 | 0.372292  |
| 40 | 1 | 0 | 6.926575  | -0.697890 | 1.895176  |
| 41 | 1 | 0 | 6.465712  | -2.398122 | 1.815709  |
| 42 | 7 | 0 | -0.120806 | -0.703058 | -0.219588 |
| 43 | 6 | 0 | 0.001902  | -2.047039 | -0.662467 |
| 44 | 6 | 0 | -1.503939 | -0.500489 | 0.036635  |
| 45 | 6 | 0 | -1.262093 | -2.660933 | -0.687517 |
| 46 | 6 | 0 | 1.128502  | -2.739964 | -1.104960 |
| 47 | 6 | 0 | -2.220272 | -1.675986 | -0.229665 |
| 48 | 6 | 0 | -1.407573 | -3.977470 | -1.120171 |
| 49 | 6 | 0 | 0.968936  | -4.052738 | -1.530178 |
| 50 | 1 | 0 | 2.105934  | -2.278655 | -1.121992 |
| 51 | 6 | 0 | -3.597090 | -1.737759 | -0.021237 |
| 52 | 6 | 0 | -0.283817 | -4.674102 | -1.536084 |
| 53 | 1 | 0 | -2.387546 | -4.444929 | -1.136332 |
| 54 | 1 | 0 | 1.840717  | -4.602980 | -1.870349 |
| 55 | 6 | 0 | -4.276712 | -0.628744 | 0.465029  |
| 56 | 1 | 0 | -4.138450 | -2.656248 | -0.232966 |
| 57 | 1 | 0 | -0.375694 | -5.700567 | -1.876300 |
| 58 | 6 | 0 | -3.538466 | 0.532815  | 0.746672  |
| 59 | 1 | 0 | -4.051815 | 1.405551  | 1.139905  |

|    |   |   |           |           |           |
|----|---|---|-----------|-----------|-----------|
| 60 | 6 | 0 | -2.167660 | 0.613920  | 0.549581  |
| 61 | 1 | 0 | -1.639988 | 1.525625  | 0.792820  |
| 62 | 6 | 0 | -5.776466 | -0.676870 | 0.694946  |
| 63 | 1 | 0 | -6.112907 | -1.680678 | 0.408127  |
| 64 | 6 | 0 | -6.133901 | -0.473909 | 2.172098  |
| 65 | 1 | 0 | -7.214180 | -0.569230 | 2.323622  |
| 66 | 1 | 0 | -5.633626 | -1.212529 | 2.805729  |
| 67 | 1 | 0 | -5.836433 | 0.521644  | 2.518619  |
| 68 | 6 | 0 | -6.519551 | 0.330690  | -0.190242 |
| 69 | 1 | 0 | -6.236003 | 1.359272  | 0.057358  |
| 70 | 1 | 0 | -6.296709 | 0.167544  | -1.249044 |
| 71 | 1 | 0 | -7.601996 | 0.241411  | -0.050965 |

-----

Step2

Method: cam-b3lyp/6-31+G(d,p) TD(NStates=3) SCRF(solvent=THF)

Excited State 1: Singlet-A 4.2884 eV 289.11 nm f=0.3216  
 <S\*\*2>=0.000  
 122 ->124 0.15901  
 123 ->124 0.64448

Step3

Method: cam-b3lyp/6-31+G(d,p) SCRF(Solvent=THF,NonEquilibrium=Save)  
 SCF Done: E(RCAM-B3LYP) = -1358.19336547 a.u.

Step4

Method: CAM-B3LYP/6-31+G(d,p) TD(NStates=1,Root=1)  
 SCRF(Solvent=THF,ExternalIteration,NonEquilibrium=Read)

After PCM corrections, the energy is -1358.03543583 a.u.

Excited State 1: Singlet-A 4.2888 eV 289.09 nm f=0.2490  
 <S\*\*2>=0.000  
 120 ->124 0.10135  
 122 ->124 0.18133  
 123 ->124 0.63905

Step5

Method: cam-b3lyp/6-31G(d) opt freq(savenormalmodes)  
 TD(NStates=1,Root=1)

Total Energy, E(TD-HF/TD-DFT) = -1357.97357701 a.u.  
 Lowest frequency = 18.7046

Standard orientation:

| Center Number | Atomic Number | Atomic Type | Coordinates (Angstroms) |          |           |
|---------------|---------------|-------------|-------------------------|----------|-----------|
|               |               |             | X                       | Y        | Z         |
| 1             | 5             | 0           | 1.026261                | 0.292121 | -0.059426 |
| 2             | 6             | 0           | 3.845974                | 0.962148 | -0.890535 |
| 3             | 1             | 0           | 3.194206                | 0.861394 | -1.765150 |
| 4             | 1             | 0           | 3.658707                | 1.961205 | -0.485154 |
| 5             | 1             | 0           | 4.885842                | 0.927870 | -1.228551 |
| 6             | 6             | 0           | 1.983778                | 2.326037 | 1.950818  |

|    |   |   |           |           |           |
|----|---|---|-----------|-----------|-----------|
| 7  | 1 | 0 | 2.072678  | 3.168810  | 2.642598  |
| 8  | 1 | 0 | 1.399009  | 1.538108  | 2.437895  |
| 9  | 1 | 0 | 2.984827  | 1.911182  | 1.798171  |
| 10 | 6 | 0 | -0.191991 | 1.487561  | -2.611433 |
| 11 | 1 | 0 | 0.583564  | 0.761055  | -2.879223 |
| 12 | 1 | 0 | -1.093769 | 0.913514  | -2.370223 |
| 13 | 1 | 0 | -0.418786 | 2.084125  | -3.499636 |
| 14 | 6 | 0 | 0.304106  | 6.133125  | -0.820545 |
| 15 | 1 | 0 | -0.554617 | 6.482106  | -0.233578 |
| 16 | 1 | 0 | 1.174799  | 6.704262  | -0.482497 |
| 17 | 1 | 0 | 0.112042  | 6.396175  | -1.864885 |
| 18 | 6 | 0 | 0.518459  | 4.651124  | -0.659089 |
| 19 | 6 | 0 | 1.148696  | 4.130710  | 0.470738  |
| 20 | 1 | 0 | 1.494732  | 4.816500  | 1.242025  |
| 21 | 6 | 0 | 1.336692  | 2.765535  | 0.659670  |
| 22 | 6 | 0 | 0.878998  | 1.827438  | -0.314421 |
| 23 | 6 | 0 | 0.253029  | 2.368728  | -1.472588 |
| 24 | 6 | 0 | 0.083166  | 3.743771  | -1.618478 |
| 25 | 1 | 0 | -0.389749 | 4.119609  | -2.523918 |
| 26 | 6 | 0 | 2.138327  | -1.547846 | 1.454465  |
| 27 | 6 | 0 | 3.264821  | -2.233874 | 1.903542  |
| 28 | 1 | 0 | 3.133724  | -3.043957 | 2.618575  |
| 29 | 6 | 0 | 4.549507  | -1.904219 | 1.486751  |
| 30 | 6 | 0 | 4.676248  | -0.841576 | 0.592933  |
| 31 | 1 | 0 | 5.669112  | -0.565455 | 0.242328  |
| 32 | 6 | 0 | 3.579606  | -0.130696 | 0.116516  |
| 33 | 6 | 0 | 2.256981  | -0.470875 | 0.531958  |
| 34 | 6 | 0 | 0.804066  | -1.951255 | 2.027524  |
| 35 | 1 | 0 | 0.178569  | -2.479934 | 1.299255  |
| 36 | 1 | 0 | 0.934078  | -2.618763 | 2.884098  |
| 37 | 1 | 0 | 0.232804  | -1.077545 | 2.361166  |
| 38 | 6 | 0 | 5.754808  | -2.671755 | 1.962873  |
| 39 | 1 | 0 | 6.101799  | -3.386374 | 1.206234  |
| 40 | 1 | 0 | 6.595411  | -2.005045 | 2.181012  |
| 41 | 1 | 0 | 5.531284  | -3.241288 | 2.869701  |
| 42 | 7 | 0 | -0.182908 | -0.569712 | -0.439072 |
| 43 | 6 | 0 | -0.193969 | -1.623854 | -1.347660 |
| 44 | 6 | 0 | -1.459151 | -0.448188 | 0.063434  |
| 45 | 6 | 0 | -1.486711 | -2.191136 | -1.429768 |
| 46 | 6 | 0 | 0.877154  | -2.117029 | -2.085316 |
| 47 | 6 | 0 | -2.319270 | -1.416017 | -0.511755 |
| 48 | 6 | 0 | -1.714426 | -3.260902 | -2.268096 |
| 49 | 6 | 0 | 0.627090  | -3.197446 | -2.934301 |
| 50 | 1 | 0 | 1.864007  | -1.682305 | -1.989538 |
| 51 | 6 | 0 | -3.645755 | -1.456693 | -0.148308 |
| 52 | 6 | 0 | -0.641475 | -3.759919 | -3.024798 |
| 53 | 1 | 0 | -2.697225 | -3.714042 | -2.347197 |
| 54 | 1 | 0 | 1.438140  | -3.605951 | -3.527182 |
| 55 | 6 | 0 | -4.139790 | -0.533971 | 0.796301  |
| 56 | 1 | 0 | -4.318954 | -2.191178 | -0.580264 |
| 57 | 1 | 0 | -0.807405 | -4.602528 | -3.687401 |
| 58 | 6 | 0 | -3.270756 | 0.415531  | 1.349081  |
| 59 | 1 | 0 | -3.653682 | 1.128171  | 2.071881  |
| 60 | 6 | 0 | -1.929362 | 0.481989  | 0.995075  |
| 61 | 1 | 0 | -1.267593 | 1.231042  | 1.410716  |
| 62 | 6 | 0 | -5.600335 | -0.574941 | 1.197103  |
| 63 | 1 | 0 | -6.065855 | -1.395442 | 0.639165  |
| 64 | 6 | 0 | -5.766578 | -0.875836 | 2.692286  |
| 65 | 1 | 0 | -6.828124 | -0.961437 | 2.944320  |
| 66 | 1 | 0 | -5.273387 | -1.812892 | 2.966852  |

|    |   |   |           |           |           |
|----|---|---|-----------|-----------|-----------|
| 67 | 1 | 0 | -5.340873 | -0.077134 | 3.308294  |
| 68 | 6 | 0 | -6.327174 | 0.720321  | 0.812239  |
| 69 | 1 | 0 | -5.921726 | 1.579839  | 1.355814  |
| 70 | 1 | 0 | -6.235856 | 0.924824  | -0.258514 |
| 71 | 1 | 0 | -7.391256 | 0.642907  | 1.056153  |

Step6

Method: cam-b3lyp/6-31+G(d,p) TD(NStates=1, Root=1)  
 SCRF(Solvent=THF,ExternalIteration,NonEquilibrium=Save)  
 After PCM corrections, the energy is -1358.07622186 a.u.

Excited State 1: Singlet-A 2.8157 eV 440.33 nm f=0.0440  
 <S\*\*2>=0.000  
 115 ->124 0.11172  
 123 ->124 -0.68242

Step7

Method: cam-b3lyp/6-31+G(d,p) SCRF(Solvent=THF, NonEquilibrium=Read)

SCF Done: E(RCAM-B3LYP) = -1358.17319586 a.u.

Results

|                 |   |            |          |            |
|-----------------|---|------------|----------|------------|
| Absorb Energy   | = | 0.158 a.u. | 4.297 eV | 288.504 nm |
| Emission Energy | = | 0.097 a.u. | 2.639 eV | 469.851 nm |
| Stokes Shift    | = | 0.061 a.u. | 1.659 eV | 181.347 nm |

Compound 2° acetonitrile

Step1

Method: cam-b3lyp/6-31G(d)  
 Solvent : Acetonitrile  
 SCF Done: E(RCAM-B3LYP) = -1358.10775073 a.u.  
 Lowest frequency = 20.7042

Standard orientation:

| Center Number | Atomic Number | Atomic Type | Coordinates (Angstroms) |          |           |
|---------------|---------------|-------------|-------------------------|----------|-----------|
|               |               |             | X                       | Y        | Z         |
| 1             | 5             | 0           | 0.940702                | 0.261285 | -0.062435 |
| 2             | 6             | 0           | 3.328187                | 0.862547 | -1.882105 |
| 3             | 1             | 0           | 2.770878                | 0.274225 | -2.620053 |
| 4             | 1             | 0           | 2.780281                | 1.795715 | -1.731964 |
| 5             | 1             | 0           | 4.296454                | 1.105526 | -2.327053 |
| 6             | 6             | 0           | 1.436671                | 2.278171 | 2.186998  |
| 7             | 1             | 0           | 1.675309                | 3.139461 | 2.816122  |
| 8             | 1             | 0           | 0.699316                | 1.675158 | 2.729051  |
| 9             | 1             | 0           | 2.339491                | 1.671177 | 2.086486  |
| 10            | 6             | 0           | -0.299217               | 1.399984 | -2.544878 |
| 11            | 1             | 0           | 0.459431                | 0.639615 | -2.746604 |
| 12            | 1             | 0           | -1.238030               | 0.872039 | -2.347437 |
| 13            | 1             | 0           | -0.435474               | 1.982670 | -3.459629 |

|    |   |   |           |           |           |
|----|---|---|-----------|-----------|-----------|
| 14 | 6 | 0 | -0.095514 | 6.057312  | -0.721326 |
| 15 | 1 | 0 | -0.329392 | 6.552602  | 0.225218  |
| 16 | 1 | 0 | 0.799404  | 6.541607  | -1.129432 |
| 17 | 1 | 0 | -0.914881 | 6.247515  | -1.420204 |
| 18 | 6 | 0 | 0.130254  | 4.580908  | -0.527785 |
| 19 | 6 | 0 | 0.648407  | 4.082827  | 0.663532  |
| 20 | 1 | 0 | 0.864230  | 4.772134  | 1.476506  |
| 21 | 6 | 0 | 0.904138  | 2.724686  | 0.845936  |
| 22 | 6 | 0 | 0.615738  | 1.805073  | -0.184948 |
| 23 | 6 | 0 | 0.071762  | 2.304221  | -1.390516 |
| 24 | 6 | 0 | -0.149017 | 3.671601  | -1.543359 |
| 25 | 1 | 0 | -0.556280 | 4.036528  | -2.483515 |
| 26 | 6 | 0 | 2.664238  | -1.001729 | 1.395748  |
| 27 | 6 | 0 | 3.966379  | -1.383499 | 1.712142  |
| 28 | 1 | 0 | 4.139918  | -1.958781 | 2.618741  |
| 29 | 6 | 0 | 5.048031  | -1.055843 | 0.900117  |
| 30 | 6 | 0 | 4.793041  | -0.321243 | -0.253467 |
| 31 | 1 | 0 | 5.620129  | -0.062756 | -0.910531 |
| 32 | 6 | 0 | 3.507332  | 0.098569  | -0.591556 |
| 33 | 6 | 0 | 2.412631  | -0.238898 | 0.232343  |
| 34 | 6 | 0 | 1.557749  | -1.441555 | 2.328531  |
| 35 | 1 | 0 | 0.999084  | -2.284757 | 1.908887  |
| 36 | 1 | 0 | 1.971047  | -1.765546 | 3.287205  |
| 37 | 1 | 0 | 0.834692  | -0.647468 | 2.530852  |
| 38 | 6 | 0 | 6.450346  | -1.460129 | 1.271979  |
| 39 | 1 | 0 | 7.080174  | -1.576824 | 0.385677  |
| 40 | 1 | 0 | 6.921773  | -0.702800 | 1.909300  |
| 41 | 1 | 0 | 6.460194  | -2.402517 | 1.826899  |
| 42 | 7 | 0 | -0.120463 | -0.702325 | -0.220529 |
| 43 | 6 | 0 | 0.002172  | -2.044967 | -0.666716 |
| 44 | 6 | 0 | -1.503278 | -0.500253 | 0.036511  |
| 45 | 6 | 0 | -1.261996 | -2.658861 | -0.693474 |
| 46 | 6 | 0 | 1.128833  | -2.736825 | -1.111167 |
| 47 | 6 | 0 | -2.220145 | -1.674833 | -0.233135 |
| 48 | 6 | 0 | -1.407538 | -3.974572 | -1.129321 |
| 49 | 6 | 0 | 0.969376  | -4.048687 | -1.539578 |
| 50 | 1 | 0 | 2.106022  | -2.274981 | -1.128144 |
| 51 | 6 | 0 | -3.597183 | -1.736891 | -0.024690 |
| 52 | 6 | 0 | -0.283540 | -4.670197 | -1.546761 |
| 53 | 1 | 0 | -2.387365 | -4.442223 | -1.146755 |
| 54 | 1 | 0 | 1.840995  | -4.598036 | -1.881554 |
| 55 | 6 | 0 | -4.276248 | -0.629027 | 0.465397  |
| 56 | 1 | 0 | -4.138973 | -2.654450 | -0.239149 |
| 57 | 1 | 0 | -0.375348 | -5.695831 | -1.889406 |
| 58 | 6 | 0 | -3.537367 | 0.531420  | 0.751126  |
| 59 | 1 | 0 | -4.050123 | 1.402748  | 1.148197  |
| 60 | 6 | 0 | -2.166482 | 0.612589  | 0.553841  |
| 61 | 1 | 0 | -1.638099 | 1.522734  | 0.801390  |
| 62 | 6 | 0 | -5.775869 | -0.677731 | 0.696445  |
| 63 | 1 | 0 | -6.113304 | -1.679046 | 0.402564  |
| 64 | 6 | 0 | -6.131019 | -0.485380 | 2.175624  |
| 65 | 1 | 0 | -7.211218 | -0.580577 | 2.327501  |
| 66 | 1 | 0 | -5.631296 | -1.229801 | 2.802993  |
| 67 | 1 | 0 | -5.831814 | 0.507223  | 2.529072  |
| 68 | 6 | 0 | -6.519487 | 0.337111  | -0.179940 |
| 69 | 1 | 0 | -6.235802 | 1.363700  | 0.075700  |
| 70 | 1 | 0 | -6.298328 | 0.181986  | -1.240369 |
| 71 | 1 | 0 | -7.601684 | 0.246494  | -0.039990 |

Step2

Method: cam-b3lyp/6-31+G(d,p) TD(NStates=3) SCRF(solvent=acetonitrile)

Excited State 1: Singlet-A 4.2939 eV 288.74 nm f=0.3127  
 <S\*\*2>=0.000  
 122 ->124 0.15401  
 123 ->124 0.64561

Step3

Method: cam-b3lyp/6-31+G(d,p)  
 SCRF(Solvent=acetonitrile,NonEquilibrium=Save)  
 SCF Done: E(RCAM-B3LYP) = -1358.19479223 a.u.

Step4

Method: CAM-B3LYP/6-31+G(d,p) TD(NStates=1,Root=1)  
 SCRF(Solvent=acetonitrile,ExternalIteration,NonEquilibrium=Read)

After PCM corrections, the energy is -1358.03634565 a.u.

Excited State 1: Singlet-A 4.2954 eV 288.64 nm f=0.2490  
 <S\*\*2>=0.000  
 120 ->124 0.10014  
 122 ->124 0.17195  
 123 ->124 0.64129

Step5

Method: cam-b3lyp/6-31G(d) opt freq(savenormalmodes)  
 TD(NStates=1,Root=1)

Total Energy, E(TD-HF/TD-DFT) = -1357.97447012 a.u.  
 Lowest frequency = 18.3067

Standard orientation:

| Center Number | Atomic Number | Atomic Type | Coordinates (Angstroms) |          |           |
|---------------|---------------|-------------|-------------------------|----------|-----------|
|               |               |             | X                       | Y        | Z         |
| 1             | 5             | 0           | 1.023809                | 0.294008 | -0.058371 |
| 2             | 6             | 0           | 3.840369                | 0.974027 | -0.899096 |
| 3             | 1             | 0           | 3.185967                | 0.867503 | -1.771141 |
| 4             | 1             | 0           | 3.650118                | 1.972888 | -0.494364 |
| 5             | 1             | 0           | 4.879205                | 0.943651 | -1.240510 |
| 6             | 6             | 0           | 1.964924                | 2.335989 | 1.953502  |
| 7             | 1             | 0           | 2.048448                | 3.179326 | 2.645198  |
| 8             | 1             | 0           | 1.381911                | 1.545750 | 2.439095  |
| 9             | 1             | 0           | 2.968318                | 1.926069 | 1.802312  |
| 10            | 6             | 0           | -0.185602               | 1.479492 | -2.615551 |
| 11            | 1             | 0           | 0.597254                | 0.758744 | -2.877874 |
| 12            | 1             | 0           | -1.083227               | 0.897963 | -2.376594 |
| 13            | 1             | 0           | -0.413943               | 2.072493 | -3.505719 |
| 14            | 6             | 0           | 0.269121                | 6.131315 | -0.826077 |
| 15            | 1             | 0           | -0.594645               | 6.474086 | -0.242935 |
| 16            | 1             | 0           | 1.133930                | 6.708841 | -0.483900 |
| 17            | 1             | 0           | 0.079516                | 6.392478 | -1.871291 |
| 18            | 6             | 0           | 0.493209                | 4.650867 | -0.662901 |
| 19            | 6             | 0           | 1.122630                | 4.135460 | 0.470125  |

|    |   |   |           |           |           |
|----|---|---|-----------|-----------|-----------|
| 20 | 1 | 0 | 1.460652  | 4.824142  | 1.242366  |
| 21 | 6 | 0 | 1.318939  | 2.771487  | 0.660525  |
| 22 | 6 | 0 | 0.870250  | 1.829905  | -0.314000 |
| 23 | 6 | 0 | 0.247281  | 2.365816  | -1.476167 |
| 24 | 6 | 0 | 0.068623  | 3.739927  | -1.623987 |
| 25 | 1 | 0 | -0.402940 | 4.111923  | -2.531701 |
| 26 | 6 | 0 | 2.149060  | -1.533287 | 1.460109  |
| 27 | 6 | 0 | 3.279125  | -2.215644 | 1.906991  |
| 28 | 1 | 0 | 3.152783  | -3.023612 | 2.625265  |
| 29 | 6 | 0 | 4.561409  | -1.884743 | 1.483186  |
| 30 | 6 | 0 | 4.682200  | -0.824077 | 0.585623  |
| 31 | 1 | 0 | 5.673032  | -0.546871 | 0.230189  |
| 32 | 6 | 0 | 3.581676  | -0.117408 | 0.111418  |
| 33 | 6 | 0 | 2.261699  | -0.460560 | 0.532020  |
| 34 | 6 | 0 | 0.817418  | -1.935875 | 2.039535  |
| 35 | 1 | 0 | 0.190559  | -2.469001 | 1.315630  |
| 36 | 1 | 0 | 0.950767  | -2.598660 | 2.899234  |
| 37 | 1 | 0 | 0.245819  | -1.060770 | 2.369067  |
| 38 | 6 | 0 | 5.770472  | -2.648394 | 1.956253  |
| 39 | 1 | 0 | 6.114672  | -3.365142 | 1.200398  |
| 40 | 1 | 0 | 6.611207  | -1.979538 | 2.167016  |
| 41 | 1 | 0 | 5.552470  | -3.215073 | 2.866153  |
| 42 | 7 | 0 | -0.178558 | -0.572260 | -0.434517 |
| 43 | 6 | 0 | -0.185139 | -1.630552 | -1.339843 |
| 44 | 6 | 0 | -1.457357 | -0.453389 | 0.065725  |
| 45 | 6 | 0 | -1.475899 | -2.202007 | -1.421353 |
| 46 | 6 | 0 | 0.887735  | -2.121003 | -2.076686 |
| 47 | 6 | 0 | -2.312987 | -1.425101 | -0.508766 |
| 48 | 6 | 0 | -1.699290 | -3.276111 | -2.255477 |
| 49 | 6 | 0 | 0.642436  | -3.206128 | -2.921283 |
| 50 | 1 | 0 | 1.872086  | -1.679260 | -1.986188 |
| 51 | 6 | 0 | -3.640601 | -1.468367 | -0.149348 |
| 52 | 6 | 0 | -0.623851 | -3.774418 | -3.009226 |
| 53 | 1 | 0 | -2.680470 | -3.732664 | -2.333703 |
| 54 | 1 | 0 | 1.454853  | -3.612836 | -3.513526 |
| 55 | 6 | 0 | -4.139515 | -0.544754 | 0.791868  |
| 56 | 1 | 0 | -4.310394 | -2.205618 | -0.581596 |
| 57 | 1 | 0 | -0.786306 | -4.620256 | -3.668487 |
| 58 | 6 | 0 | -3.273917 | 0.406608  | 1.346921  |
| 59 | 1 | 0 | -3.659810 | 1.118019  | 2.069381  |
| 60 | 6 | 0 | -1.931433 | 0.475205  | 0.996574  |
| 61 | 1 | 0 | -1.271695 | 1.223285  | 1.417385  |
| 62 | 6 | 0 | -5.601270 | -0.587939 | 1.187820  |
| 63 | 1 | 0 | -6.063649 | -1.408908 | 0.628300  |
| 64 | 6 | 0 | -5.771849 | -0.888962 | 2.682490  |
| 65 | 1 | 0 | -6.834216 | -0.975315 | 2.930759  |
| 66 | 1 | 0 | -5.279227 | -1.826051 | 2.958074  |
| 67 | 1 | 0 | -5.348613 | -0.089933 | 3.299830  |
| 68 | 6 | 0 | -6.328325 | 0.706548  | 0.800755  |
| 69 | 1 | 0 | -5.925567 | 1.566521  | 1.345708  |
| 70 | 1 | 0 | -6.234241 | 0.910565  | -0.269894 |
| 71 | 1 | 0 | -7.393004 | 0.627470  | 1.041461  |

-----

Step6

Method: cam-b3lyp/6-31+G(d,p) TD(NStates=1, Root=1)  
 SCRF(Solvent=acetonitrile,ExternalIteration,NonEquilibrium=Save)  
 After PCM corrections, the energy is -1358.08027162 a.u.

Excited State 1: Singlet-A 2.7801 eV 445.98 nm f=0.0457  
 <S\*\*2>=0.000  
 115 ->124 0.11103  
 123 ->124 0.68225

Step7

Method: cam-b3lyp/6-31+G(d,p) SCRF(Solvent=acetonitrile,  
 NonEquilibrium=Read)

SCF Done: E(RCAM-B3LYP) = -1358.17363401 a.u.

Results

| -----           |   |            |          |            |
|-----------------|---|------------|----------|------------|
| Absorb Energy   | = | 0.158 a.u. | 4.312 eV | 287.563 nm |
| -----           |   |            |          |            |
| Emission Energy | = | 0.093 a.u. | 2.541 eV | 488.027 nm |
| -----           |   |            |          |            |
| Stokes Shift    | = | 0.065 a.u. | 1.771 eV | 200.464 nm |
| -----           |   |            |          |            |

Compound Z-2b n-hexane

Step1

Method: cam-b3lyp/6-31G(d)  
 Solvent : n-Hexane  
 SCF Done: E(RCAM-B3LYP) = -1318.81006533 a.u.  
 Lowest frequency = 20.9622

Standard orientation:

| -----            |                  |                |                         |           |           |  |
|------------------|------------------|----------------|-------------------------|-----------|-----------|--|
| Center<br>Number | Atomic<br>Number | Atomic<br>Type | Coordinates (Angstroms) |           |           |  |
|                  |                  |                | X                       | Y         | Z         |  |
| -----            |                  |                |                         |           |           |  |
| 1                | 5                | 0              | 1.176474                | 0.058784  | 0.022789  |  |
| 2                | 6                | 0              | 3.677597                | 0.346881  | -1.702102 |  |
| 3                | 1                | 0              | 3.015207                | -0.128369 | -2.434240 |  |
| 4                | 1                | 0              | 3.318495                | 1.368625  | -1.556649 |  |
| 5                | 1                | 0              | 4.672304                | 0.398938  | -2.152307 |  |
| 6                | 6                | 0              | 1.891721                | 2.033194  | 2.247139  |  |
| 7                | 1                | 0              | 2.179238                | 2.872885  | 2.885099  |  |
| 8                | 1                | 0              | 1.089918                | 1.493695  | 2.763616  |  |
| 9                | 1                | 0              | 2.745256                | 1.354629  | 2.177141  |  |
| 10               | 6                | 0              | 0.155913                | 1.306699  | -2.511863 |  |
| 11               | 1                | 0              | 0.787772                | 0.428463  | -2.664444 |  |
| 12               | 1                | 0              | -0.863127               | 0.942535  | -2.344514 |  |
| 13               | 1                | 0              | 0.152274                | 1.878036  | -3.443924 |  |
| 14               | 6                | 0              | 0.941696                | 5.925485  | -0.756184 |  |
| 15               | 1                | 0              | 0.725350                | 6.464579  | 0.170601  |  |
| 16               | 1                | 0              | 1.911985                | 6.282497  | -1.121048 |  |
| 17               | 1                | 0              | 0.190471                | 6.208353  | -1.498949 |  |
| 18               | 6                | 0              | 0.962140                | 4.436150  | -0.534053 |  |
| 19               | 6                | 0              | 1.379056                | 3.896568  | 0.678375  |  |
| 20               | 1                | 0              | 1.665734                | 4.566443  | 1.485751  |  |
| 21               | 6                | 0              | 1.446767                | 2.521105  | 0.888724  |  |
| 22               | 6                | 0              | 1.061320                | 1.628444  | -0.134342 |  |
| 23               | 6                | 0              | 0.620182                | 2.172212  | -1.361817 |  |
| 24               | 6                | 0              | 0.589551                | 3.553526  | -1.541775 |  |
| 25               | 1                | 0              | 0.258218                | 3.951276  | -2.498336 |  |



|    |   |   |           |           |           |
|----|---|---|-----------|-----------|-----------|
| 26 | 6 | 0 | 2.668919  | -1.382690 | 1.567424  |
| 27 | 6 | 0 | 3.901314  | -1.916977 | 1.941719  |
| 28 | 1 | 0 | 3.972089  | -2.490703 | 2.861758  |
| 29 | 6 | 0 | 5.028182  | -1.731311 | 1.155577  |
| 30 | 6 | 0 | 4.930044  | -0.993766 | -0.014770 |
| 31 | 1 | 0 | 5.808202  | -0.847748 | -0.637584 |
| 32 | 6 | 0 | 3.717665  | -0.426408 | -0.405336 |
| 33 | 6 | 0 | 2.562773  | -0.617520 | 0.383671  |
| 34 | 6 | 0 | 1.480062  | -1.665376 | 2.458276  |
| 35 | 1 | 0 | 0.856457  | -2.463107 | 2.041188  |
| 36 | 1 | 0 | 1.812179  | -1.990924 | 3.447712  |
| 37 | 1 | 0 | 0.834730  | -0.794512 | 2.595750  |
| 38 | 7 | 0 | 0.010014  | -0.764911 | -0.163515 |
| 39 | 6 | 0 | -0.022372 | -2.125656 | -0.571597 |
| 40 | 6 | 0 | -1.345523 | -0.382925 | 0.031827  |
| 41 | 6 | 0 | -1.351898 | -2.575437 | -0.633766 |
| 42 | 6 | 0 | 1.022836  | -2.966362 | -0.952221 |
| 43 | 6 | 0 | -2.193805 | -1.465875 | -0.237057 |
| 44 | 6 | 0 | -1.646586 | -3.874140 | -1.041787 |
| 45 | 6 | 0 | 0.713851  | -4.259653 | -1.353231 |
| 46 | 1 | 0 | 2.051187  | -2.633390 | -0.939044 |
| 47 | 6 | 0 | -3.573591 | -1.348223 | -0.083086 |
| 48 | 6 | 0 | -0.606021 | -4.717972 | -1.395663 |
| 49 | 1 | 0 | -2.676787 | -4.214510 | -1.086587 |
| 50 | 1 | 0 | 1.521029  | -4.924570 | -1.644475 |
| 51 | 6 | 0 | -4.125137 | -0.150260 | 0.350481  |
| 52 | 1 | 0 | -4.218672 | -2.196784 | -0.296360 |
| 53 | 1 | 0 | -0.814763 | -5.733807 | -1.715678 |
| 54 | 6 | 0 | -3.257231 | 0.916281  | 0.635463  |
| 55 | 1 | 0 | -3.670358 | 1.857145  | 0.987529  |
| 56 | 6 | 0 | -1.881084 | 0.819514  | 0.492103  |
| 57 | 1 | 0 | -1.251818 | 1.664733  | 0.733869  |
| 58 | 6 | 0 | -5.626258 | -0.003721 | 0.521291  |
| 59 | 1 | 0 | -6.076140 | -0.964616 | 0.242248  |
| 60 | 6 | 0 | -6.009428 | 0.279654  | 1.978568  |
| 61 | 1 | 0 | -7.097899 | 0.324407  | 2.090250  |
| 62 | 1 | 0 | -5.628626 | -0.498689 | 2.646532  |
| 63 | 1 | 0 | -5.601496 | 1.238437  | 2.316026  |
| 64 | 6 | 0 | -6.203368 | 1.065558  | -0.413782 |
| 65 | 1 | 0 | -5.801385 | 2.056565  | -0.177326 |
| 66 | 1 | 0 | -5.963167 | 0.848883  | -1.458938 |
| 67 | 1 | 0 | -7.292924 | 1.117094  | -0.316369 |
| 68 | 1 | 0 | 5.980873  | -2.158021 | 1.455131  |

-----

Step2

Method: cam-b3lyp/6-31+G(d,p) TD(NStates=3) SCRF(solvent=n-hexane)

Excited State 1: Singlet-A 4.2779 eV 289.83 nm f=0.3063  
 <S\*\*2>=0.000  
 118 ->120 0.19135  
 119 ->120 0.63522

Step3

Method: cam-b3lyp/6-31+G(d,p) SCRF(Solvent=n-hexane,NonEquilibrium=Save)  
 SCF Done: E(RCAM-B3LYP) = -1318.89397871 a.u.

Step4

Method: CAM-B3LYP/6-31+G(d,p) TD(NStates=1,Root=1)  
 SCRF(Solvent=n-hexane,ExternalIteration,NonEquilibrium=Read)

After PCM corrections, the energy is -1318.73738373 a.u.

Excited State 1: Singlet-A 4.2698 eV 290.37 nm f=0.2375  
 <S\*\*2>=0.000  
 118 ->120 0.21993  
 119 ->120 0.62776

Step5

Method: cam-b3lyp/6-31G(d) opt freq(savenormalmodes)  
 TD(NStates=1,Root=1)

Total Energy, E(TD-HF/TD-DFT) = -1318.67906564 a.u.  
 Lowest frequency = 17.3371

Standard orientation:

| Center<br>Number | Atomic<br>Number | Atomic<br>Type | Coordinates (Angstroms) |           |           |
|------------------|------------------|----------------|-------------------------|-----------|-----------|
|                  |                  |                | X                       | Y         | Z         |
| 1                | 5                | 0              | 1.244845                | -0.045926 | 0.089977  |
| 2                | 6                | 0              | 4.183526                | -0.010151 | -0.542601 |
| 3                | 1                | 0              | 3.586164                | -0.043432 | -1.459938 |
| 4                | 1                | 0              | 4.181482                | 1.035148  | -0.219160 |
| 5                | 1                | 0              | 5.214020                | -0.279914 | -0.791995 |
| 6                | 6                | 0              | 2.463527                | 1.918333  | 2.018508  |
| 7                | 1                | 0              | 2.673075                | 2.783814  | 2.653953  |
| 8                | 1                | 0              | 1.705687                | 1.301346  | 2.513178  |
| 9                | 1                | 0              | 3.369918                | 1.306758  | 1.977572  |
| 10               | 6                | 0              | 0.451347                | 1.147122  | -2.632808 |
| 11               | 1                | 0              | 1.073444                | 0.258541  | -2.787932 |
| 12               | 1                | 0              | -0.564894               | 0.792268  | -2.427667 |
| 13               | 1                | 0              | 0.413364                | 1.700141  | -3.575621 |
| 14               | 6                | 0              | 1.774925                | 5.731644  | -1.137161 |
| 15               | 1                | 0              | 0.969013                | 6.292959  | -0.648025 |
| 16               | 1                | 0              | 2.720337                | 6.144764  | -0.770946 |
| 17               | 1                | 0              | 1.710107                | 5.938014  | -2.209571 |
| 18               | 6                | 0              | 1.671134                | 4.255981  | -0.855752 |
| 19               | 6                | 0              | 2.107623                | 3.718737  | 0.353619  |
| 20               | 1                | 0              | 2.537024                | 4.384626  | 1.099929  |
| 21               | 6                | 0              | 2.001610                | 2.364625  | 0.652136  |
| 22               | 6                | 0              | 1.427076                | 1.456877  | -0.288580 |
| 23               | 6                | 0              | 0.996488                | 2.012916  | -1.525907 |
| 24               | 6                | 0              | 1.121646                | 3.375801  | -1.780684 |
| 25               | 1                | 0              | 0.794501                | 3.760279  | -2.744926 |
| 26               | 6                | 0              | 1.839124                | -1.945422 | 1.809230  |
| 27               | 6                | 0              | 2.766122                | -2.803493 | 2.394390  |
| 28               | 1                | 0              | 2.425301                | -3.514606 | 3.143085  |
| 29               | 6                | 0              | 4.110711                | -2.752103 | 2.057007  |
| 30               | 6                | 0              | 4.528483                | -1.819483 | 1.116366  |
| 31               | 1                | 0              | 5.577467                | -1.775776 | 0.833629  |
| 32               | 6                | 0              | 3.632649                | -0.945294 | 0.506895  |
| 33               | 6                | 0              | 2.242905                | -0.986345 | 0.835366  |
| 34               | 6                | 0              | 0.413539                | -2.030315 | 2.291291  |
| 35               | 1                | 0              | -0.255135               | -2.483088 | 1.550586  |
| 36               | 1                | 0              | 0.346788                | -2.639181 | 3.197405  |

|    |   |   |           |           |           |
|----|---|---|-----------|-----------|-----------|
| 37 | 1 | 0 | 0.010054  | -1.037866 | 2.521992  |
| 38 | 7 | 0 | -0.097431 | -0.682557 | -0.328328 |
| 39 | 6 | 0 | -0.266888 | -1.775960 | -1.168194 |
| 40 | 6 | 0 | -1.345980 | -0.274607 | 0.072443  |
| 41 | 6 | 0 | -1.640915 | -2.081347 | -1.310603 |
| 42 | 6 | 0 | 0.724674  | -2.530694 | -1.786610 |
| 43 | 6 | 0 | -2.351233 | -1.092927 | -0.502055 |
| 44 | 6 | 0 | -2.028892 | -3.145256 | -2.095510 |
| 45 | 6 | 0 | 0.312316  | -3.599356 | -2.584939 |
| 46 | 1 | 0 | 1.771416  | -2.301289 | -1.633873 |
| 47 | 6 | 0 | -3.676362 | -0.840122 | -0.232112 |
| 48 | 6 | 0 | -1.035895 | -3.902481 | -2.738094 |
| 49 | 1 | 0 | -3.076452 | -3.401322 | -2.218307 |
| 50 | 1 | 0 | 1.058483  | -4.206881 | -3.085308 |
| 51 | 6 | 0 | -4.025703 | 0.231669  | 0.614456  |
| 52 | 1 | 0 | -4.460373 | -1.455030 | -0.664466 |
| 53 | 1 | 0 | -1.328682 | -4.743339 | -3.357816 |
| 54 | 6 | 0 | -3.014958 | 1.031561  | 1.163074  |
| 55 | 1 | 0 | -3.286753 | 1.862485  | 1.805462  |
| 56 | 6 | 0 | -1.670776 | 0.804089  | 0.901517  |
| 57 | 1 | 0 | -0.894601 | 1.441886  | 1.304074  |
| 58 | 6 | 0 | -5.484445 | 0.513358  | 0.911452  |
| 59 | 1 | 0 | -6.074350 | -0.245402 | 0.383879  |
| 60 | 6 | 0 | -5.791945 | 0.382904  | 2.408769  |
| 61 | 1 | 0 | -6.861242 | 0.529710  | 2.589930  |
| 62 | 1 | 0 | -5.513282 | -0.604326 | 2.788504  |
| 63 | 1 | 0 | -5.249465 | 1.133214  | 2.992920  |
| 64 | 6 | 0 | -5.912559 | 1.887302  | 0.379318  |
| 65 | 1 | 0 | -5.372470 | 2.694262  | 0.884779  |
| 66 | 1 | 0 | -5.721319 | 1.976343  | -0.693968 |
| 67 | 1 | 0 | -6.982167 | 2.043550  | 0.550554  |
| 68 | 1 | 0 | 4.824087  | -3.426500 | 2.521153  |

-----

Step6

Method: cam-b3lyp/6-31+G(d,p) TD(NStates=1, Root=1)  
 SCRF(Solvent=n-hexane,ExternalIteration,NonEquilibrium=Save)  
 After PCM corrections, the energy is -1318.77084669 a.u.

Excited State 1: Singlet-A 2.8686 eV 432.21 nm f=0.0374  
 <S\*\*2>=0.000  
 111 ->120 -0.11159  
 119 ->120 0.68297

Step7

Method: cam-b3lyp/6-31+G(d,p) SCRF(Solvent=n-hexane,  
 NonEquilibrium=Read)

SCF Done: E(RCAM-B3LYP) = -1318.87477663 a.u.

Results

|                 |   |            |          |            |
|-----------------|---|------------|----------|------------|
| Absorb Energy   | = | 0.157 a.u. | 4.261 eV | 290.963 nm |
| Emission Energy | = | 0.104 a.u. | 2.828 eV | 438.404 nm |
| Stokes Shift    | = | 0.053 a.u. | 1.433 eV | 147.441 nm |

-----

Compound Z-2b THF

Step1

Method: cam-b3lyp/6-31G(d)

Solvent : TetraHydroFuran

SCF Done: E(RCAM-B3LYP) = -1318.81313146 a.u.

Lowest frequency = 20.7561

Standard orientation:

| Center<br>Number | Atomic<br>Number | Atomic<br>Type | Coordinates (Angstroms) |           |           |
|------------------|------------------|----------------|-------------------------|-----------|-----------|
|                  |                  |                | X                       | Y         | Z         |
| 1                | 5                | 0              | 1.178833                | 0.064538  | 0.025353  |
| 2                | 6                | 0              | 3.679303                | 0.332069  | -1.708893 |
| 3                | 1                | 0              | 3.041350                | -0.171388 | -2.443999 |
| 4                | 1                | 0              | 3.289310                | 1.344849  | -1.581883 |
| 5                | 1                | 0              | 4.678684                | 0.406345  | -2.145172 |
| 6                | 6                | 0              | 1.856000                | 2.052130  | 2.255265  |
| 7                | 1                | 0              | 2.169427                | 2.892208  | 2.880259  |
| 8                | 1                | 0              | 1.035951                | 1.547344  | 2.778462  |
| 9                | 1                | 0              | 2.687078                | 1.345285  | 2.197400  |
| 10               | 6                | 0              | 0.173245                | 1.298187  | -2.518772 |
| 11               | 1                | 0              | 0.821225                | 0.431582  | -2.670697 |
| 12               | 1                | 0              | -0.839547               | 0.915986  | -2.353402 |
| 13               | 1                | 0              | 0.160863                | 1.869925  | -3.450392 |
| 14               | 6                | 0              | 0.912324                | 5.928805  | -0.770493 |
| 15               | 1                | 0              | 0.677216                | 6.468354  | 0.151377  |
| 16               | 1                | 0              | 1.885786                | 6.292155  | -1.120219 |
| 17               | 1                | 0              | 0.171624                | 6.203195  | -1.526750 |
| 18               | 6                | 0              | 0.941107                | 4.440235  | -0.543831 |
| 19               | 6                | 0              | 1.351906                | 3.906813  | 0.673780  |
| 20               | 1                | 0              | 1.627338                | 4.580919  | 1.481518  |
| 21               | 6                | 0              | 1.426373                | 2.532011  | 0.889137  |
| 22               | 6                | 0              | 1.056383                | 1.633551  | -0.134728 |
| 23               | 6                | 0              | 0.620961                | 2.170955  | -1.367432 |
| 24               | 6                | 0              | 0.582083                | 3.551721  | -1.552026 |
| 25               | 1                | 0              | 0.256008                | 3.944414  | -2.512428 |
| 26               | 6                | 0              | 2.672828                | -1.364503 | 1.578978  |
| 27               | 6                | 0              | 3.905321                | -1.896361 | 1.957289  |
| 28               | 1                | 0              | 3.976569                | -2.462403 | 2.882018  |
| 29               | 6                | 0              | 5.032411                | -1.717017 | 1.169025  |
| 30               | 6                | 0              | 4.933773                | -0.989109 | -0.007629 |
| 31               | 1                | 0              | 5.811616                | -0.848643 | -0.632135 |
| 32               | 6                | 0              | 3.720765                | -0.424893 | -0.402653 |
| 33               | 6                | 0              | 2.566495                | -0.608159 | 0.389145  |
| 34               | 6                | 0              | 1.483697                | -1.637753 | 2.472593  |
| 35               | 1                | 0              | 0.848129                | -2.424928 | 2.053478  |
| 36               | 1                | 0              | 1.815256                | -1.973279 | 3.458742  |
| 37               | 1                | 0              | 0.850810                | -0.758873 | 2.617486  |
| 38               | 7                | 0              | 0.015188                | -0.764137 | -0.161827 |
| 39               | 6                | 0              | -0.011756               | -2.124088 | -0.571742 |
| 40               | 6                | 0              | -1.341611               | -0.387446 | 0.033182  |
| 41               | 6                | 0              | -1.339803               | -2.579179 | -0.635392 |
| 42               | 6                | 0              | 1.036739                | -2.960441 | -0.954033 |
| 43               | 6                | 0              | -2.186252               | -1.473001 | -0.238082 |
| 44               | 6                | 0              | -1.629893               | -3.878817 | -1.045329 |
| 45               | 6                | 0              | 0.732931                | -4.254647 | -1.357262 |

|    |   |   |           |           |           |
|----|---|---|-----------|-----------|-----------|
| 46 | 1 | 0 | 2.063591  | -2.622883 | -0.942415 |
| 47 | 6 | 0 | -3.567157 | -1.360883 | -0.085566 |
| 48 | 6 | 0 | -0.585584 | -4.718306 | -1.400193 |
| 49 | 1 | 0 | -2.658706 | -4.223126 | -1.090885 |
| 50 | 1 | 0 | 1.542544  | -4.915773 | -1.650306 |
| 51 | 6 | 0 | -4.123280 | -0.165203 | 0.349663  |
| 52 | 1 | 0 | -4.208850 | -2.211346 | -0.301231 |
| 53 | 1 | 0 | -0.790307 | -5.734426 | -1.721743 |
| 54 | 6 | 0 | -3.259001 | 0.903991  | 0.638279  |
| 55 | 1 | 0 | -3.675527 | 1.842425  | 0.992748  |
| 56 | 6 | 0 | -1.882067 | 0.812125  | 0.495975  |
| 57 | 1 | 0 | -1.255810 | 1.658249  | 0.742336  |
| 58 | 6 | 0 | -5.625272 | -0.023948 | 0.518476  |
| 59 | 1 | 0 | -6.071432 | -0.985718 | 0.237377  |
| 60 | 6 | 0 | -6.011467 | 0.256676  | 1.975539  |
| 61 | 1 | 0 | -7.100279 | 0.297699  | 2.084314  |
| 62 | 1 | 0 | -5.630564 | -0.522045 | 2.643258  |
| 63 | 1 | 0 | -5.607331 | 1.216500  | 2.314743  |
| 64 | 6 | 0 | -6.204068 | 1.045280  | -0.415707 |
| 65 | 1 | 0 | -5.805310 | 2.037118  | -0.177061 |
| 66 | 1 | 0 | -5.963208 | 0.830217  | -1.461203 |
| 67 | 1 | 0 | -7.293749 | 1.092803  | -0.318749 |
| 68 | 1 | 0 | 5.985158  | -2.141251 | 1.471807  |

-----

Step2

Method: cam-b3lyp/6-31+G(d,p) TD(NStates=3) SCRF(solvent=THF)

Excited State 1: Singlet-A 4.2909 eV 288.95 nm f=0.3104  
 <S\*\*2>=0.000  
 118 ->120 0.18040  
 119 ->120 0.63740

Step3

Method: cam-b3lyp/6-31+G(d,p) SCRF(Solvent=THF,NonEquilibrium=Save)  
 SCF Done: E(RCAM-B3LYP) = -1318.89732152 a.u.

Step4

Method: CAM-B3LYP/6-31+G(d,p) TD(NStates=1,Root=1)  
 SCRF(Solvent=THF,ExternalIteration,NonEquilibrium=Read)

After PCM corrections, the energy is -1318.73970347 a.u.

Excited State 1: Singlet-A 4.2844 eV 289.38 nm f=0.2373  
 <S\*\*2>=0.000  
 117 ->120 0.10114  
 118 ->120 0.20598  
 119 ->120 0.63126

Step5

Method: cam-b3lyp/6-31G(d) opt freq(savenormalmodes)  
 TD(NStates=1,Root=1)

Total Energy, E(TD-HF/TD-DFT) = -1318.68095586 a.u.  
 Lowest frequency = 18.9788

## Standard orientation:

| Center<br>Number | Atomic<br>Number | Atomic<br>Type | Coordinates (Angstroms) |           |           |
|------------------|------------------|----------------|-------------------------|-----------|-----------|
|                  |                  |                | X                       | Y         | Z         |
| 1                | 5                | 0              | 1.241092                | -0.040765 | 0.084310  |
| 2                | 6                | 0              | 4.179901                | 0.011537  | -0.568914 |
| 3                | 1                | 0              | 3.575122                | -0.033815 | -1.480929 |
| 4                | 1                | 0              | 4.170541                | 1.058172  | -0.249413 |
| 5                | 1                | 0              | 5.210876                | -0.250216 | -0.824609 |
| 6                | 6                | 0              | 2.445085                | 1.937785  | 2.014880  |
| 7                | 1                | 0              | 2.645145                | 2.803991  | 2.652317  |
| 8                | 1                | 0              | 1.692260                | 1.312084  | 2.506637  |
| 9                | 1                | 0              | 3.358504                | 1.336634  | 1.971215  |
| 10               | 6                | 0              | 0.437740                | 1.143655  | -2.632203 |
| 11               | 1                | 0              | 1.067571                | 0.260034  | -2.784133 |
| 12               | 1                | 0              | -0.574271               | 0.779067  | -2.422815 |
| 13               | 1                | 0              | 0.392005                | 1.693681  | -3.576422 |
| 14               | 6                | 0              | 1.711189                | 5.746210  | -1.139945 |
| 15               | 1                | 0              | 0.899229                | 6.297224  | -0.649270 |
| 16               | 1                | 0              | 2.651590                | 6.170730  | -0.773991 |
| 17               | 1                | 0              | 1.641827                | 5.952035  | -2.212093 |
| 18               | 6                | 0              | 1.625007                | 4.269152  | -0.858596 |
| 19               | 6                | 0              | 2.069551                | 3.736633  | 0.350929  |
| 20               | 1                | 0              | 2.491325                | 4.407653  | 1.097044  |
| 21               | 6                | 0              | 1.978441                | 2.380990  | 0.649188  |
| 22               | 6                | 0              | 1.411625                | 1.467408  | -0.289907 |
| 23               | 6                | 0              | 0.975510                | 2.017332  | -1.528077 |
| 24               | 6                | 0              | 1.084535                | 3.382481  | -1.783253 |
| 25               | 1                | 0              | 0.750954                | 3.763231  | -2.746781 |
| 26               | 6                | 0              | 1.865371                | -1.921495 | 1.812335  |
| 27               | 6                | 0              | 2.801528                | -2.771617 | 2.397056  |
| 28               | 1                | 0              | 2.469762                | -3.479515 | 3.152886  |
| 29               | 6                | 0              | 4.143630                | -2.715533 | 2.049179  |
| 30               | 6                | 0              | 4.550100                | -1.786538 | 1.098859  |
| 31               | 1                | 0              | 5.596865                | -1.739291 | 0.808306  |
| 32               | 6                | 0              | 3.644110                | -0.921780 | 0.489811  |
| 33               | 6                | 0              | 2.257524                | -0.969695 | 0.827110  |
| 34               | 6                | 0              | 0.443391                | -2.006935 | 2.304364  |
| 35               | 1                | 0              | -0.228230               | -2.465959 | 1.570126  |
| 36               | 1                | 0              | 0.383368                | -2.609338 | 3.215248  |
| 37               | 1                | 0              | 0.039012                | -1.013102 | 2.527736  |
| 38               | 7                | 0              | -0.087908               | -0.686358 | -0.324944 |
| 39               | 6                | 0              | -0.252156               | -1.790824 | -1.156013 |
| 40               | 6                | 0              | -1.341995               | -0.282269 | 0.073061  |
| 41               | 6                | 0              | -1.624094               | -2.105609 | -1.292269 |
| 42               | 6                | 0              | 0.742439                | -2.538963 | -1.776897 |
| 43               | 6                | 0              | -2.340558               | -1.112312 | -0.493966 |
| 44               | 6                | 0              | -2.007811               | -3.178190 | -2.067961 |
| 45               | 6                | 0              | 0.335258                | -3.617997 | -2.564615 |
| 46               | 1                | 0              | 1.788424                | -2.295206 | -1.640216 |
| 47               | 6                | 0              | -3.667776               | -0.866989 | -0.226527 |
| 48               | 6                | 0              | -1.011415               | -3.933632 | -2.707664 |
| 49               | 1                | 0              | -3.053906               | -3.440940 | -2.186923 |
| 50               | 1                | 0              | 1.083643                | -4.221328 | -3.066675 |
| 51               | 6                | 0              | -4.024344               | 0.209684  | 0.611261  |
| 52               | 1                | 0              | -4.446764               | -1.491812 | -0.652987 |
| 53               | 1                | 0              | -1.300536               | -4.781088 | -3.319832 |
| 54               | 6                | 0              | -3.019297               | 1.018790  | 1.156787  |
| 55               | 1                | 0              | -3.295963               | 1.850282  | 1.796289  |

|    |   |   |           |           |           |
|----|---|---|-----------|-----------|-----------|
| 56 | 6 | 0 | -1.672989 | 0.796431  | 0.898551  |
| 57 | 1 | 0 | -0.901314 | 1.436441  | 1.306866  |
| 58 | 6 | 0 | -5.485174 | 0.483929  | 0.904615  |
| 59 | 1 | 0 | -6.069328 | -0.281423 | 0.381018  |
| 60 | 6 | 0 | -5.793554 | 0.361321  | 2.402440  |
| 61 | 1 | 0 | -6.864209 | 0.502526  | 2.579817  |
| 62 | 1 | 0 | -5.510087 | -0.622336 | 2.788099  |
| 63 | 1 | 0 | -5.256842 | 1.119054  | 2.982449  |
| 64 | 6 | 0 | -5.920069 | 1.852282  | 0.363620  |
| 65 | 1 | 0 | -5.385377 | 2.665260  | 0.865342  |
| 66 | 1 | 0 | -5.728692 | 1.934848  | -0.710255 |
| 67 | 1 | 0 | -6.990855 | 2.002272  | 0.532854  |
| 68 | 1 | 0 | 4.864025  | -3.382973 | 2.512732  |

-----

Step6

Method: cam-b3lyp/6-31+G(d,p) TD(NStates=1, Root=1)  
 SCRF(Solvent=THF,ExternalIteration,NonEquilibrium=Save)  
 After PCM corrections, the energy is -1318.78179141 a.u.

Excited State 1: Singlet-A 2.7598 eV 449.24 nm f=0.0416  
 <S\*\*2>=0.000  
 111 ->120 -0.11114  
 119 ->120 0.68264

Step7

Method: cam-b3lyp/6-31+G(d,p) SCRF(Solvent=THF, NonEquilibrium=Read)

SCF Done: E(RCAM-B3LYP) = -1318.87631384 a.u.

Results

|                 |   |            |          |            |
|-----------------|---|------------|----------|------------|
| Absorb Energy   | = | 0.158 a.u. | 4.289 eV | 289.074 nm |
| Emission Energy | = | 0.095 a.u. | 2.572 eV | 482.037 nm |
| Stokes Shift    | = | 0.063 a.u. | 1.717 eV | 192.963 nm |

Compound Z-2b ACN

Step1

Method: cam-b3lyp/6-31G(d)  
 Solvent : Acetonitrile  
 SCF Done: E(RCAM-B3LYP) = -1318.81442492 a.u.  
 Lowest frequency = 21.2116

Standard orientation:

| Center Number | Atomic Number | Atomic Type | Coordinates (Angstroms) |           |           |
|---------------|---------------|-------------|-------------------------|-----------|-----------|
|               |               |             | X                       | Y         | Z         |
| 1             | 5             | 0           | 1.179502                | 0.064556  | 0.025944  |
| 2             | 6             | 0           | 3.682683                | 0.319537  | -1.708927 |
| 3             | 1             | 0           | 3.060269                | -0.199052 | -2.446894 |
| 4             | 1             | 0           | 3.275181                | 1.326674  | -1.592792 |
| 5             | 1             | 0           | 4.685141                | 0.406680  | -2.135540 |

|    |   |   |           |           |           |
|----|---|---|-----------|-----------|-----------|
| 6  | 6 | 0 | 1.844708  | 2.057400  | 2.257123  |
| 7  | 1 | 0 | 2.165901  | 2.897608  | 2.877919  |
| 8  | 1 | 0 | 1.018341  | 1.564317  | 2.781539  |
| 9  | 1 | 0 | 2.668125  | 1.341242  | 2.204759  |
| 10 | 6 | 0 | 0.183995  | 1.292576  | -2.523104 |
| 11 | 1 | 0 | 0.840219  | 0.432356  | -2.676523 |
| 12 | 1 | 0 | -0.824988 | 0.900693  | -2.357146 |
| 13 | 1 | 0 | 0.165304  | 1.865085  | -3.454081 |
| 14 | 6 | 0 | 0.911537  | 5.927684  | -0.780307 |
| 15 | 1 | 0 | 0.677113  | 6.468925  | 0.140679  |
| 16 | 1 | 0 | 1.884829  | 6.290261  | -1.131285 |
| 17 | 1 | 0 | 0.170691  | 6.200290  | -1.537024 |
| 18 | 6 | 0 | 0.940687  | 4.439553  | -0.550700 |
| 19 | 6 | 0 | 1.347392  | 3.908593  | 0.669469  |
| 20 | 1 | 0 | 1.619079  | 4.584339  | 1.477071  |
| 21 | 6 | 0 | 1.421894  | 2.534027  | 0.887715  |
| 22 | 6 | 0 | 1.056813  | 1.633409  | -0.136029 |
| 23 | 6 | 0 | 0.625330  | 2.168305  | -1.371429 |
| 24 | 6 | 0 | 0.585879  | 3.548771  | -1.558745 |
| 25 | 1 | 0 | 0.263192  | 3.939507  | -2.521064 |
| 26 | 6 | 0 | 2.670074  | -1.360336 | 1.585785  |
| 27 | 6 | 0 | 3.901893  | -1.890607 | 1.968939  |
| 28 | 1 | 0 | 3.971389  | -2.452801 | 2.896123  |
| 29 | 6 | 0 | 5.030886  | -1.714007 | 1.182419  |
| 30 | 6 | 0 | 4.934617  | -0.991111 | 0.002353  |
| 31 | 1 | 0 | 5.813727  | -0.853308 | -0.620932 |
| 32 | 6 | 0 | 3.722145  | -0.428883 | -0.397748 |
| 33 | 6 | 0 | 2.566341  | -0.608301 | 0.392780  |
| 34 | 6 | 0 | 1.478950  | -1.629396 | 2.478142  |
| 35 | 1 | 0 | 0.838836  | -2.411594 | 2.056606  |
| 36 | 1 | 0 | 1.808151  | -1.969640 | 3.463399  |
| 37 | 1 | 0 | 0.851403  | -0.747003 | 2.625295  |
| 38 | 7 | 0 | 0.015640  | -0.764173 | -0.162006 |
| 39 | 6 | 0 | -0.011172 | -2.123209 | -0.574096 |
| 40 | 6 | 0 | -1.340940 | -0.387727 | 0.033489  |
| 41 | 6 | 0 | -1.339302 | -2.578429 | -0.638742 |
| 42 | 6 | 0 | 1.037526  | -2.958678 | -0.958297 |
| 43 | 6 | 0 | -2.185852 | -1.472747 | -0.239788 |
| 44 | 6 | 0 | -1.629307 | -3.877558 | -1.051148 |
| 45 | 6 | 0 | 0.734005  | -4.252239 | -1.364110 |
| 46 | 1 | 0 | 2.064166  | -2.620399 | -0.947208 |
| 47 | 6 | 0 | -3.567009 | -1.360806 | -0.087260 |
| 48 | 6 | 0 | -0.584648 | -4.716145 | -1.407667 |
| 49 | 1 | 0 | -2.657980 | -4.222106 | -1.097511 |
| 50 | 1 | 0 | 1.543534  | -4.912596 | -1.659053 |
| 51 | 6 | 0 | -4.122905 | -0.165710 | 0.350290  |
| 52 | 1 | 0 | -4.208767 | -2.210743 | -0.304573 |
| 53 | 1 | 0 | -0.789150 | -5.731633 | -1.731248 |
| 54 | 6 | 0 | -3.258330 | 0.902909  | 0.641381  |
| 55 | 1 | 0 | -3.674702 | 1.840495  | 0.998222  |
| 56 | 6 | 0 | -1.881308 | 0.811013  | 0.498969  |
| 57 | 1 | 0 | -1.254779 | 1.656107  | 0.748210  |
| 58 | 6 | 0 | -5.624932 | -0.024506 | 0.519339  |
| 59 | 1 | 0 | -6.071354 | -0.985126 | 0.235145  |
| 60 | 6 | 0 | -6.011046 | 0.251849  | 1.977278  |
| 61 | 1 | 0 | -7.099848 | 0.293158  | 2.085607  |
| 62 | 1 | 0 | -5.631288 | -0.529614 | 2.642543  |
| 63 | 1 | 0 | -5.606356 | 1.210370  | 2.319524  |
| 64 | 6 | 0 | -6.203186 | 1.048108  | -0.411329 |
| 65 | 1 | 0 | -5.804507 | 2.039096  | -0.168992 |



|    |   |   |           |           |           |
|----|---|---|-----------|-----------|-----------|
| 66 | 1 | 0 | -5.962615 | 0.836311  | -1.457631 |
| 67 | 1 | 0 | -7.292828 | 1.095108  | -0.314236 |
| 68 | 1 | 0 | 5.983074  | -2.136597 | 1.489144  |

-----

Step2

Method: cam-b3lyp/6-31+G(d,p) TD(NStates=3) SCRF(solvent=acetonitrile)

Excited State 1: Singlet-A 4.2979 eV 288.48 nm f=0.3018  
 <S\*\*2>=0.000  
 118 ->120 0.17486  
 119 ->120 0.63866

Step3

Method: cam-b3lyp/6-31+G(d,p)  
 SCRF(Solvent=acetonitrile,NonEquilibrium=Save)  
 SCF Done: E(RCAM-B3LYP) = -1318.89873996 a.u.

Step4

Method: CAM-B3LYP/6-31+G(d,p) TD(NStates=1,Root=1)  
 SCRF(Solvent=acetonitrile,ExternalIteration,NonEquilibrium=Read)

After PCM corrections, the energy is -1318.74049788 a.u.

Excited State 1: Singlet-A 4.2935 eV 288.77 nm f=0.2377  
 <S\*\*2>=0.000  
 117 ->120 0.10169  
 118 ->120 0.19545  
 119 ->120 0.63393

Step5

Method: cam-b3lyp/6-31G(d) opt freq(savenormalmodes)  
 TD(NStates=1,Root=1)

Total Energy, E(TD-HF/TD-DFT) = -1318.68184577 a.u.  
 Lowest frequency = 19.8571

Standard orientation:

-----

| Center<br>Number | Atomic<br>Number | Atomic<br>Type | Coordinates (Angstroms) |           |           |
|------------------|------------------|----------------|-------------------------|-----------|-----------|
|                  |                  |                | X                       | Y         | Z         |
| 1                | 5                | 0              | 1.238953                | -0.038082 | 0.084305  |
| 2                | 6                | 0              | 4.175362                | 0.016102  | -0.587660 |
| 3                | 1                | 0              | 3.565469                | -0.036540 | -1.495993 |
| 4                | 1                | 0              | 4.164265                | 1.064084  | -0.272388 |
| 5                | 1                | 0              | 5.205730                | -0.243451 | -0.847833 |
| 6                | 6                | 0              | 2.443146                | 1.945314  | 2.012627  |
| 7                | 1                | 0              | 2.644241                | 2.811777  | 2.649305  |
| 8                | 1                | 0              | 1.691756                | 1.319347  | 2.506393  |
| 9                | 1                | 0              | 3.357211                | 1.345326  | 1.965353  |
| 10               | 6                | 0              | 0.429666                | 1.142699  | -2.629634 |
| 11               | 1                | 0              | 1.063150                | 0.261652  | -2.781510 |
| 12               | 1                | 0              | -0.580065               | 0.773328  | -2.417538 |
| 13               | 1                | 0              | 0.379167                | 1.691899  | -3.574062 |
| 14               | 6                | 0              | 1.685758                | 5.751914  | -1.139809 |

-----

|    |   |   |           |           |           |
|----|---|---|-----------|-----------|-----------|
| 15 | 1 | 0 | 0.872612  | 6.298871  | -0.646635 |
| 16 | 1 | 0 | 2.624932  | 6.180576  | -0.775602 |
| 17 | 1 | 0 | 1.612390  | 5.957853  | -2.211620 |
| 18 | 6 | 0 | 1.606692  | 4.274371  | -0.858681 |
| 19 | 6 | 0 | 2.056933  | 3.743442  | 0.349905  |
| 20 | 1 | 0 | 2.477538  | 4.416247  | 1.095051  |
| 21 | 6 | 0 | 1.971712  | 2.387346  | 0.648253  |
| 22 | 6 | 0 | 1.405236  | 1.471705  | -0.289024 |
| 23 | 6 | 0 | 0.965372  | 2.019407  | -1.526975 |
| 24 | 6 | 0 | 1.067834  | 3.385417  | -1.782353 |
| 25 | 1 | 0 | 0.730181  | 3.764847  | -2.744969 |
| 26 | 6 | 0 | 1.878417  | -1.909850 | 1.815896  |
| 27 | 6 | 0 | 2.819452  | -2.755888 | 2.399735  |
| 28 | 1 | 0 | 2.493059  | -3.461102 | 3.160391  |
| 29 | 6 | 0 | 4.159681  | -2.698862 | 2.044173  |
| 30 | 6 | 0 | 4.559472  | -1.773645 | 1.086894  |
| 31 | 1 | 0 | 5.604518  | -1.726277 | 0.790247  |
| 32 | 6 | 0 | 3.648174  | -0.913582 | 0.478629  |
| 33 | 6 | 0 | 2.263868  | -0.962699 | 0.823839  |
| 34 | 6 | 0 | 0.458714  | -1.995065 | 2.314364  |
| 35 | 1 | 0 | -0.214849 | -2.458620 | 1.584696  |
| 36 | 1 | 0 | 0.403004  | -2.592976 | 3.228446  |
| 37 | 1 | 0 | 0.053535  | -1.000535 | 2.533188  |
| 38 | 7 | 0 | -0.084994 | -0.687853 | -0.320794 |
| 39 | 6 | 0 | -0.246224 | -1.795630 | -1.149601 |
| 40 | 6 | 0 | -1.341728 | -0.286455 | 0.076029  |
| 41 | 6 | 0 | -1.617129 | -2.114417 | -1.285015 |
| 42 | 6 | 0 | 0.750386  | -2.540161 | -1.771466 |
| 43 | 6 | 0 | -2.336991 | -1.120192 | -0.490590 |
| 44 | 6 | 0 | -1.997974 | -3.189944 | -2.058214 |
| 45 | 6 | 0 | 0.346409  | -3.622553 | -2.556487 |
| 46 | 1 | 0 | 1.795667  | -2.290122 | -1.639954 |
| 47 | 6 | 0 | -3.665470 | -0.877493 | -0.226596 |
| 48 | 6 | 0 | -0.999387 | -3.943589 | -2.696791 |
| 49 | 1 | 0 | -3.043220 | -3.455955 | -2.176325 |
| 50 | 1 | 0 | 1.096255  | -4.223329 | -3.059420 |
| 51 | 6 | 0 | -4.026015 | 0.199819  | 0.608785  |
| 52 | 1 | 0 | -4.441929 | -1.504789 | -0.653773 |
| 53 | 1 | 0 | -1.286248 | -4.793207 | -3.306935 |
| 54 | 6 | 0 | -3.023829 | 1.010925  | 1.156661  |
| 55 | 1 | 0 | -3.303304 | 1.841348  | 1.796341  |
| 56 | 6 | 0 | -1.676298 | 0.790775  | 0.901523  |
| 57 | 1 | 0 | -0.906941 | 1.430548  | 1.314937  |
| 58 | 6 | 0 | -5.488094 | 0.471397  | 0.898253  |
| 59 | 1 | 0 | -6.069483 | -0.293540 | 0.371353  |
| 60 | 6 | 0 | -5.800455 | 0.345119  | 2.394961  |
| 61 | 1 | 0 | -6.871879 | 0.484383  | 2.569149  |
| 62 | 1 | 0 | -5.517039 | -0.639326 | 2.778734  |
| 63 | 1 | 0 | -5.266429 | 1.102360  | 2.978127  |
| 64 | 6 | 0 | -5.923069 | 1.840450  | 0.359067  |
| 65 | 1 | 0 | -5.391028 | 2.653025  | 0.864363  |
| 66 | 1 | 0 | -5.729053 | 1.925144  | -0.714211 |
| 67 | 1 | 0 | -6.994592 | 1.988212  | 0.525540  |
| 68 | 1 | 0 | 4.883847  | -3.362731 | 2.506991  |

-----

Step6

Method: cam-b3lyp/6-31+G(d,p) TD(NStates=1, Root=1)  
 SCRF(Solvent=acetonitrile,ExternalIteration,NonEquilibrium=Save)

After PCM corrections, the energy is -1318.78596032 a.u.

Excited State 1: Singlet-A 2.7222 eV 455.46 nm f=0.0433  
<S\*\*2>=0.000  
111 ->120 -0.11015  
119 ->120 0.68249

Step7

Method: cam-b3lyp/6-31+G(d,p) SCRF(Solvent=acetonitrile,  
NonEquilibrium=Read)

SCF Done: E(RCAM-B3LYP) = -1318.87670962 a.u.

#### Results

| -----           |   |            |          |            |
|-----------------|---|------------|----------|------------|
|                 | = |            |          |            |
| Absorb Energy   | = | 0.158 a.u. | 4.306 eV | 287.934 nm |
| -----           |   |            |          |            |
| Emission Energy | = | 0.091 a.u. | 2.469 eV | 502.079 nm |
| -----           |   |            |          |            |
| Stokes Shift    | = | 0.067 a.u. | 1.837 eV | 214.145 nm |
| -----           |   |            |          |            |

Compound E-2b n-hexane

Step1

Method: cam-b3lyp/6-31G(d)  
Solvent : n-Hexane  
SCF Done: E(RCAM-B3LYP) = -1318.81006710 a.u.  
Lowest frequency = 21.5132

#### Standard orientation:

| -----            |                  |                |                         |           |           |  |
|------------------|------------------|----------------|-------------------------|-----------|-----------|--|
| Center<br>Number | Atomic<br>Number | Atomic<br>Type | Coordinates (Angstroms) |           |           |  |
|                  |                  |                | X                       | Y         | Z         |  |
| -----            |                  |                |                         |           |           |  |
| 1                | 5                | 0              | 0.936285                | 0.455791  | -0.107616 |  |
| 2                | 6                | 0              | 3.316167                | 0.999130  | -1.952342 |  |
| 3                | 1                | 0              | 2.718403                | 0.408241  | -2.655515 |  |
| 4                | 1                | 0              | 2.809447                | 1.958437  | -1.823231 |  |
| 5                | 1                | 0              | 4.281486                | 1.188428  | -2.428842 |  |
| 6                | 6                | 0              | 1.469487                | 2.559391  | 2.040621  |  |
| 7                | 1                | 0              | 1.675969                | 3.444031  | 2.648570  |  |
| 8                | 1                | 0              | 0.754784                | 1.943317  | 2.597971  |  |
| 9                | 1                | 0              | 2.394635                | 1.984385  | 1.955146  |  |
| 10               | 6                | 0              | -0.309520               | 1.480450  | -2.634244 |  |
| 11               | 1                | 0              | 0.424596                | 0.684922  | -2.782681 |  |
| 12               | 1                | 0              | -1.267584               | 0.995819  | -2.418852 |  |
| 13               | 1                | 0              | -0.416242               | 2.013640  | -3.582703 |  |
| 14               | 6                | 0              | 0.160892                | 4.732710  | -0.765161 |  |
| 15               | 6                | 0              | 0.681501                | 4.306827  | 0.447573  |  |
| 16               | 1                | 0              | 0.910913                | 5.032693  | 1.222737  |  |
| 17               | 6                | 0              | 0.924245                | 2.955036  | 0.688867  |  |
| 18               | 6                | 0              | 0.619857                | 1.996064  | -0.301276 |  |
| 19               | 6                | 0              | 0.075807                | 2.437844  | -1.528911 |  |
| 20               | 6                | 0              | -0.133736               | 3.799005  | -1.746913 |  |
| 21               | 1                | 0              | -0.538497               | 4.126271  | -2.700696 |  |
| 22               | 6                | 0              | 2.666744                | -0.748646 | 1.391947  |  |

|    |   |   |           |           |           |
|----|---|---|-----------|-----------|-----------|
| 23 | 6 | 0 | 3.970706  | -1.115023 | 1.717066  |
| 24 | 1 | 0 | 4.148771  | -1.655124 | 2.644258  |
| 25 | 6 | 0 | 5.047802  | -0.817483 | 0.888956  |
| 26 | 6 | 0 | 4.787061  | -0.128108 | -0.290282 |
| 27 | 1 | 0 | 5.611182  | 0.107250  | -0.959669 |
| 28 | 6 | 0 | 3.500047  | 0.276868  | -0.638683 |
| 29 | 6 | 0 | 2.409011  | -0.032218 | 0.200981  |
| 30 | 6 | 0 | 1.566532  | -1.157735 | 2.345573  |
| 31 | 1 | 0 | 1.029560  | -2.036709 | 1.973845  |
| 32 | 1 | 0 | 1.983154  | -1.415905 | 3.322793  |
| 33 | 1 | 0 | 0.823991  | -0.371176 | 2.499515  |
| 34 | 7 | 0 | -0.130002 | -0.506199 | -0.212574 |
| 35 | 6 | 0 | -0.016544 | -1.872829 | -0.586030 |
| 36 | 6 | 0 | -1.512781 | -0.280633 | 0.029379  |
| 37 | 6 | 0 | -1.284848 | -2.477102 | -0.581975 |
| 38 | 6 | 0 | 1.105329  | -2.595663 | -0.989818 |
| 39 | 6 | 0 | -2.236496 | -1.462959 | -0.177959 |
| 40 | 6 | 0 | -1.439366 | -3.812577 | -0.946241 |
| 41 | 6 | 0 | 0.936218  | -3.927081 | -1.347008 |
| 42 | 1 | 0 | 2.086609  | -2.143748 | -1.026791 |
| 43 | 6 | 0 | -3.613750 | -1.503415 | 0.028772  |
| 44 | 6 | 0 | -0.320748 | -4.538128 | -1.323430 |
| 45 | 1 | 0 | -2.423000 | -4.272608 | -0.939940 |
| 46 | 1 | 0 | 1.804517  | -4.500791 | -1.655896 |
| 47 | 6 | 0 | -4.286640 | -0.366050 | 0.454237  |
| 48 | 1 | 0 | -4.161390 | -2.427618 | -0.137206 |
| 49 | 1 | 0 | -0.420006 | -5.580143 | -1.610242 |
| 50 | 6 | 0 | -3.541034 | 0.802769  | 0.677303  |
| 51 | 1 | 0 | -4.049190 | 1.698756  | 1.022003  |
| 52 | 6 | 0 | -2.169329 | 0.863662  | 0.481080  |
| 53 | 1 | 0 | -1.636555 | 1.783810  | 0.676638  |
| 54 | 6 | 0 | -5.787352 | -0.391099 | 0.680603  |
| 55 | 1 | 0 | -6.130241 | -1.406454 | 0.445969  |
| 56 | 6 | 0 | -6.148633 | -0.108310 | 2.143566  |
| 57 | 1 | 0 | -7.230025 | -0.188030 | 2.296814  |
| 58 | 1 | 0 | -5.654598 | -0.814964 | 2.817035  |
| 59 | 1 | 0 | -5.845317 | 0.901959  | 2.438364  |
| 60 | 6 | 0 | -6.520035 | 0.572959  | -0.259927 |
| 61 | 1 | 0 | -6.229627 | 1.611172  | -0.066686 |
| 62 | 1 | 0 | -6.293560 | 0.352736  | -1.307406 |
| 63 | 1 | 0 | -7.603840 | 0.499708  | -0.121109 |
| 64 | 1 | 0 | -0.012260 | 5.789581  | -0.945360 |
| 65 | 6 | 0 | 6.452130  | -1.204788 | 1.270718  |
| 66 | 1 | 0 | 7.082832  | -1.341267 | 0.387778  |
| 67 | 1 | 0 | 6.919917  | -0.429701 | 1.889149  |
| 68 | 1 | 0 | 6.467406  | -2.133677 | 1.848075  |

-----

Step2

Method: cam-b3lyp/6-31+G(d,p) TD(NStates=3) SCRF(solvent=n-hexane)

Excited State 1: Singlet-A 4.2844 eV 289.39 nm f=0.3106  
 <S\*\*2>=0.000  
 117 ->120 -0.10459  
 118 ->120 -0.19022  
 119 ->120 0.63488

Step3

Method: cam-b3lyp/6-31+G(d,p) SCRF(Solvent=n-hexane,NonEquilibrium=Save)  
 SCF Done: E(RCAM-B3LYP) = -1318.89398111 a.u.

Step4

Method: CAM-B3LYP/6-31+G(d,p) TD(NStates=1,Root=1)  
 SCRF(Solvent=n-hexane,ExternalIteration,NonEquilibrium=Read)

After PCM corrections, the energy is -1318.73709556 a.u.

Excited State 1: Singlet-A 4.2774 eV 289.86 nm f=0.2420  
 <S\*\*2>=0.000  
 117 ->120 -0.10743  
 118 ->120 0.21901  
 119 ->120 0.62753

Step5

Method: cam-b3lyp/6-31G(d) opt freq(savenormalmodes)  
 TD(NStates=1,Root=1)

Total Energy, E(TD-HF/TD-DFT) = -1318.67904694 a.u.  
 Lowest frequency = 17.6885

Standard orientation:

| Center Number | Atomic Number | Atomic Type | Coordinates (Angstroms) |           |           |
|---------------|---------------|-------------|-------------------------|-----------|-----------|
|               |               |             | X                       | Y         | Z         |
| 1             | 5             | 0           | 1.038003                | 0.510878  | -0.136229 |
| 2             | 6             | 0           | 3.852726                | 1.145946  | -0.993782 |
| 3             | 1             | 0           | 3.206205                | 0.979422  | -1.861882 |
| 4             | 1             | 0           | 3.660532                | 2.172417  | -0.667249 |
| 5             | 1             | 0           | 4.894354                | 1.090208  | -1.323415 |
| 6             | 6             | 0           | 1.960282                | 2.708307  | 1.696672  |
| 7             | 1             | 0           | 2.034602                | 3.608077  | 2.314568  |
| 8             | 1             | 0           | 1.382121                | 1.958132  | 2.247077  |
| 9             | 1             | 0           | 2.966987                | 2.293356  | 1.589158  |
| 10            | 6             | 0           | -0.195958               | 1.460569  | -2.787495 |
| 11            | 1             | 0           | 0.585062                | 0.719431  | -2.991458 |
| 12            | 1             | 0           | -1.095615               | 0.904484  | -2.500968 |
| 13            | 1             | 0           | -0.423164               | 1.975845  | -3.725109 |
| 14            | 6             | 0           | 0.489725                | 4.771218  | -1.108300 |
| 15            | 6             | 0           | 1.118542                | 4.375160  | 0.065255  |
| 16            | 1             | 0           | 1.452261                | 5.127974  | 0.775286  |
| 17            | 6             | 0           | 1.318502                | 3.031331  | 0.368823  |
| 18            | 6             | 0           | 0.874430                | 2.012353  | -0.528606 |
| 19            | 6             | 0           | 0.240891                | 2.442533  | -1.730574 |
| 20            | 6             | 0           | 0.057639                | 3.796764  | -1.996227 |
| 21            | 1             | 0           | -0.418161               | 4.090446  | -2.928847 |
| 22            | 6             | 0           | 2.152588                | -1.193117 | 1.529158  |
| 23            | 6             | 0           | 3.282463                | -1.828281 | 2.036895  |
| 24            | 1             | 0           | 3.155596                | -2.580140 | 2.813571  |
| 25            | 6             | 0           | 4.565995                | -1.518551 | 1.602432  |
| 26            | 6             | 0           | 4.687313                | -0.528510 | 0.629711  |
| 27            | 1             | 0           | 5.679487                | -0.268868 | 0.265119  |
| 28            | 6             | 0           | 3.587183                | 0.131227  | 0.092310  |
| 29            | 6             | 0           | 2.265120                | -0.189525 | 0.526234  |
| 30            | 6             | 0           | 0.820474                | -1.565783 | 2.127970  |
| 31            | 1             | 0           | 0.204274                | -2.159896 | 1.443756  |

|    |   |   |           |           |           |
|----|---|---|-----------|-----------|-----------|
| 32 | 1 | 0 | 0.955883  | -2.160740 | 3.035613  |
| 33 | 1 | 0 | 0.237753  | -0.675968 | 2.391869  |
| 34 | 7 | 0 | -0.172963 | -0.395382 | -0.443607 |
| 35 | 6 | 0 | -0.177222 | -1.514971 | -1.265561 |
| 36 | 6 | 0 | -1.443932 | -0.246975 | 0.055690  |
| 37 | 6 | 0 | -1.464533 | -2.100880 | -1.295978 |
| 38 | 6 | 0 | 0.898272  | -2.060115 | -1.959447 |
| 39 | 6 | 0 | -2.298955 | -1.266027 | -0.434751 |
| 40 | 6 | 0 | -1.682959 | -3.237370 | -2.043577 |
| 41 | 6 | 0 | 0.656026  | -3.206577 | -2.718668 |
| 42 | 1 | 0 | 1.882764  | -1.615294 | -1.892295 |
| 43 | 6 | 0 | -3.622240 | -1.289153 | -0.059218 |
| 44 | 6 | 0 | -0.607538 | -3.785022 | -2.761970 |
| 45 | 1 | 0 | -2.660657 | -3.707317 | -2.080077 |
| 46 | 1 | 0 | 1.470619  | -3.656115 | -3.275963 |
| 47 | 6 | 0 | -4.119491 | -0.298558 | 0.811859  |
| 48 | 1 | 0 | -4.292102 | -2.061105 | -0.426894 |
| 49 | 1 | 0 | -0.766664 | -4.680065 | -3.353908 |
| 50 | 6 | 0 | -3.257177 | 0.702667  | 1.277049  |
| 51 | 1 | 0 | -3.644532 | 1.470209  | 1.938750  |
| 52 | 6 | 0 | -1.920092 | 0.755017  | 0.907551  |
| 53 | 1 | 0 | -1.265469 | 1.548106  | 1.244818  |
| 54 | 6 | 0 | -5.577151 | -0.319620 | 1.224460  |
| 55 | 1 | 0 | -6.036429 | -1.192381 | 0.745524  |
| 56 | 6 | 0 | -5.732462 | -0.486457 | 2.741531  |
| 57 | 1 | 0 | -6.791371 | -0.560043 | 3.008063  |
| 58 | 1 | 0 | -5.226920 | -1.388934 | 3.097133  |
| 59 | 1 | 0 | -5.312292 | 0.368763  | 3.280503  |
| 60 | 6 | 0 | -6.321221 | 0.927285  | 0.728585  |
| 61 | 1 | 0 | -5.922346 | 1.836801  | 1.189075  |
| 62 | 1 | 0 | -6.237493 | 1.036226  | -0.356576 |
| 63 | 1 | 0 | -7.383197 | 0.861827  | 0.985012  |
| 64 | 1 | 0 | 0.342181  | 5.824437  | -1.327676 |
| 65 | 6 | 0 | 5.775135  | -2.235217 | 2.142691  |
| 66 | 1 | 0 | 6.108744  | -3.030445 | 1.464335  |
| 67 | 1 | 0 | 6.620415  | -1.552380 | 2.275592  |
| 68 | 1 | 0 | 5.563033  | -2.701184 | 3.109551  |

-----

Step6

Method: cam-b3lyp/6-31+G(d,p) TD(NStates=1, Root=1)  
 SCRF(Solvent=n-hexane,ExternalIteration,NonEquilibrium=Save)  
 After PCM corrections, the energy is -1318.77079766 a.u.

Excited State 1: Singlet-A 2.8711 eV 431.83 nm f=0.0380  
 <S\*\*2>=0.000  
 111 ->120 -0.11150  
 119 ->120 0.68299

Step7

Method: cam-b3lyp/6-31+G(d,p) SCRF(Solvent=n-hexane,  
 NonEquilibrium=Read)

SCF Done: E(RCAM-B3LYP) = -1318.87484357 a.u.

Results

-----

Absorb Energy = | 0.157 a.u. | 4.269 eV | 290.424 nm

|                 |   |            |          |            |
|-----------------|---|------------|----------|------------|
| Emission Energy | = | 0.104 a.u. | 2.831 eV | 437.916 nm |
| Stokes Shift    | = | 0.053 a.u. | 1.438 eV | 147.492 nm |

Compound E-2b THF

Step1

Method: cam-b3lyp/6-31G(d)  
 Solvent : TetraHydroFuran  
 SCF Done: E(RCAM-B3LYP) = -1318.81313841 a.u.  
 Lowest frequency = 21.5824

Standard orientation:

| Center Number | Atomic Number | Atomic Type | Coordinates (Angstroms) |           |           |
|---------------|---------------|-------------|-------------------------|-----------|-----------|
|               |               |             | X                       | Y         | Z         |
| 1             | 5             | 0           | 0.937652                | 0.458963  | -0.107694 |
| 2             | 6             | 0           | 3.323800                | 0.983400  | -1.954958 |
| 3             | 1             | 0           | 2.746994                | 0.376030  | -2.661605 |
| 4             | 1             | 0           | 2.796795                | 1.933448  | -1.839439 |
| 5             | 1             | 0           | 4.291626                | 1.187913  | -2.419779 |
| 6             | 6             | 0           | 1.439184                | 2.571306  | 2.044177  |
| 7             | 1             | 0           | 1.671670                | 3.458740  | 2.638352  |
| 8             | 1             | 0           | 0.702256                | 1.988082  | 2.608091  |
| 9             | 1             | 0           | 2.345318                | 1.965206  | 1.972102  |
| 10            | 6             | 0           | -0.290886               | 1.472015  | -2.644629 |
| 11            | 1             | 0           | 0.454500                | 0.686881  | -2.792705 |
| 12            | 1             | 0           | -1.242349               | 0.974186  | -2.429858 |
| 13            | 1             | 0           | -0.404620               | 2.003773  | -3.592940 |
| 14            | 6             | 0           | 0.152637                | 4.732512  | -0.781492 |
| 15            | 6             | 0           | 0.665244                | 4.311930  | 0.436843  |
| 16            | 1             | 0           | 0.885955                | 5.040904  | 1.211601  |
| 17            | 6             | 0           | 0.910100                | 2.961138  | 0.684391  |
| 18            | 6             | 0           | 0.617886                | 1.998216  | -0.305724 |
| 19            | 6             | 0           | 0.081230                | 2.434493  | -1.538996 |
| 20            | 6             | 0           | -0.131656               | 3.794456  | -1.762880 |
| 21            | 1             | 0           | -0.529929               | 4.117620  | -2.720769 |
| 22            | 6             | 0           | 2.663721                | -0.738911 | 1.401051  |
| 23            | 6             | 0           | 3.966245                | -1.106721 | 1.731101  |
| 24            | 1             | 0           | 4.141348                | -1.641461 | 2.661909  |
| 25            | 6             | 0           | 5.046215                | -0.816071 | 0.903259  |
| 26            | 6             | 0           | 4.789221                | -0.132790 | -0.280677 |
| 27            | 1             | 0           | 5.615130                | 0.096621  | -0.949871 |
| 28            | 6             | 0           | 3.503214                | 0.272615  | -0.634430 |
| 29            | 6             | 0           | 2.409833                | -0.028544 | 0.205146  |
| 30            | 6             | 0           | 1.560070                | -1.136914 | 2.355613  |
| 31            | 1             | 0           | 1.006123                | -2.003477 | 1.979712  |
| 32            | 1             | 0           | 1.975805                | -1.409708 | 3.329103  |
| 33            | 1             | 0           | 0.832591                | -0.337929 | 2.518357  |
| 34            | 7             | 0           | -0.127791               | -0.505012 | -0.213342 |
| 35            | 6             | 0           | -0.012514               | -1.870332 | -0.589274 |
| 36            | 6             | 0           | -1.510412               | -0.281649 | 0.029378  |
| 37            | 6             | 0           | -1.280240               | -2.476779 | -0.586468 |
| 38            | 6             | 0           | 1.110408                | -2.590826 | -0.995322 |
| 39            | 6             | 0           | -2.233348               | -1.464404 | -0.180422 |
| 40            | 6             | 0           | -1.433189               | -3.812202 | -0.953455 |

|    |   |   |           |           |           |
|----|---|---|-----------|-----------|-----------|
| 41 | 6 | 0 | 0.943406  | -3.922105 | -1.355330 |
| 42 | 1 | 0 | 2.090603  | -2.136652 | -1.033692 |
| 43 | 6 | 0 | -3.610984 | -1.507181 | 0.026576  |
| 44 | 6 | 0 | -0.313051 | -4.535372 | -1.332364 |
| 45 | 1 | 0 | -2.415962 | -4.274018 | -0.947970 |
| 46 | 1 | 0 | 1.812262  | -4.493723 | -1.666464 |
| 47 | 6 | 0 | -4.284892 | -0.371157 | 0.455327  |
| 48 | 1 | 0 | -4.157680 | -2.431497 | -0.141462 |
| 49 | 1 | 0 | -0.410815 | -5.576899 | -1.621293 |
| 50 | 6 | 0 | -3.540043 | 0.798092  | 0.681782  |
| 51 | 1 | 0 | -4.048670 | 1.692412  | 1.030050  |
| 52 | 6 | 0 | -2.168145 | 0.860664  | 0.485080  |
| 53 | 1 | 0 | -1.635816 | 1.780106  | 0.685122  |
| 54 | 6 | 0 | -5.785593 | -0.398418 | 0.682459  |
| 55 | 1 | 0 | -6.127705 | -1.412827 | 0.443684  |
| 56 | 6 | 0 | -6.145940 | -0.121652 | 2.146856  |
| 57 | 1 | 0 | -7.227275 | -0.202433 | 2.299275  |
| 58 | 1 | 0 | -5.652505 | -0.831891 | 2.817243  |
| 59 | 1 | 0 | -5.842844 | 0.887571  | 2.445647  |
| 60 | 6 | 0 | -6.519482 | 0.569611  | -0.253080 |
| 61 | 1 | 0 | -6.230045 | 1.607239  | -0.054952 |
| 62 | 1 | 0 | -6.294699 | 0.353747  | -1.301992 |
| 63 | 1 | 0 | -7.602875 | 0.494070  | -0.113065 |
| 64 | 1 | 0 | -0.022418 | 5.788231  | -0.966404 |
| 65 | 6 | 0 | 6.448866  | -1.204536 | 1.290133  |
| 66 | 1 | 0 | 7.081520  | -1.344828 | 0.409280  |
| 67 | 1 | 0 | 6.915969  | -0.427721 | 1.906850  |
| 68 | 1 | 0 | 6.460576  | -2.130746 | 1.871737  |

-----

Step2

Method: cam-b3lyp/6-31+G(d,p) TD(NStates=3) SCRF(solvent=THF)

Excited State 1: Singlet-A 4.2930 eV 288.80 nm f=0.3140  
 <S\*\*2>=0.000  
 117 ->120 -0.10573  
 118 ->120 -0.17773  
 119 ->120 0.63764

Step3

Method: cam-b3lyp/6-31+G(d,p) SCRF(Solvent=THF,NonEquilibrium=Save)  
 SCF Done: E(RCAM-B3LYP) = -1318.89733010 a.u.

Step4

Method: CAM-B3LYP/6-31+G(d,p) TD(NStates=1,Root=1)  
 SCRF(Solvent=THF,ExternalIteration,NonEquilibrium=Read)

After PCM corrections, the energy is -1318.73959883 a.u.

Excited State 1: Singlet-A 4.2874 eV 289.19 nm f=0.2414  
 <S\*\*2>=0.000  
 117 ->120 -0.10983  
 118 ->120 -0.20331  
 119 ->120 0.63178

Step5



Method: cam-b3lyp/6-31G(d) opt freq(savenormalmodes)  
TD(NStates=1,Root=1)

Total Energy, E(TD-HF/TD-DFT) = -1318.68092730 a.u.  
Lowest frequency = 16.8308

Standard orientation:

| Center Number | Atomic Number | Atomic Type | Coordinates (Angstroms) |           |           |
|---------------|---------------|-------------|-------------------------|-----------|-----------|
|               |               |             | X                       | Y         | Z         |
| 1             | 5             | 0           | 1.030337                | 0.510856  | -0.135142 |
| 2             | 6             | 0           | 3.841079                | 1.162446  | -1.013978 |
| 3             | 1             | 0           | 3.186424                | 0.989374  | -1.874725 |
| 4             | 1             | 0           | 3.647056                | 2.188309  | -0.685888 |
| 5             | 1             | 0           | 4.879702                | 1.111250  | -1.353544 |
| 6             | 6             | 0           | 1.935529                | 2.721601  | 1.696057  |
| 7             | 1             | 0           | 2.004289                | 3.622020  | 2.313565  |
| 8             | 1             | 0           | 1.359183                | 1.968791  | 2.245034  |
| 9             | 1             | 0           | 2.944797                | 2.312645  | 1.588135  |
| 10            | 6             | 0           | -0.204477               | 1.446016  | -2.785521 |
| 11            | 1             | 0           | 0.582976                | 0.710875  | -2.986785 |
| 12            | 1             | 0           | -1.097641               | 0.882076  | -2.493898 |
| 13            | 1             | 0           | -0.439005               | 1.955542  | -3.724469 |
| 14            | 6             | 0           | 0.452769                | 4.769061  | -1.115559 |
| 15            | 6             | 0           | 1.083714                | 4.381040  | 0.060467  |
| 16            | 1             | 0           | 1.409675                | 5.138376  | 0.769393  |
| 17            | 6             | 0           | 1.293411                | 3.038960  | 0.367128  |
| 18            | 6             | 0           | 0.857386                | 2.014823  | -0.527372 |
| 19            | 6             | 0           | 0.223885                | 2.435740  | -1.732425 |
| 20            | 6             | 0           | 0.029515                | 3.788736  | -2.001884 |
| 21            | 1             | 0           | -0.448523               | 4.076201  | -2.935324 |
| 22            | 6             | 0           | 2.170941                | -1.170323 | 1.533483  |
| 23            | 6             | 0           | 3.307291                | -1.800877 | 2.035094  |
| 24            | 1             | 0           | 3.188887                | -2.549001 | 2.816716  |
| 25            | 6             | 0           | 4.586447                | -1.491009 | 1.586749  |
| 26            | 6             | 0           | 4.697058                | -0.504269 | 0.608183  |
| 27            | 1             | 0           | 5.685494                | -0.244079 | 0.233855  |
| 28            | 6             | 0           | 3.589825                | 0.149577  | 0.077060  |
| 29            | 6             | 0           | 2.272788                | -0.175042 | 0.521307  |
| 30            | 6             | 0           | 0.843798                | -1.538995 | 2.145159  |
| 31            | 1             | 0           | 0.222427                | -2.136375 | 1.468413  |
| 32            | 1             | 0           | 0.985383                | -2.128272 | 3.055561  |
| 33            | 1             | 0           | 0.263145                | -0.646569 | 2.405074  |
| 34            | 7             | 0           | -0.166979               | -0.399417 | -0.432295 |
| 35            | 6             | 0           | -0.164087               | -1.529557 | -1.244341 |
| 36            | 6             | 0           | -1.444053               | -0.251865 | 0.061030  |
| 37            | 6             | 0           | -1.448666               | -2.120175 | -1.272106 |
| 38            | 6             | 0           | 0.913790                | -2.073253 | -1.935224 |
| 39            | 6             | 0           | -2.291341               | -1.277751 | -0.425644 |
| 40            | 6             | 0           | -1.661057               | -3.266366 | -2.006836 |
| 41            | 6             | 0           | 0.678694                | -3.230313 | -2.681361 |
| 42            | 1             | 0           | 1.894618                | -1.618142 | -1.881178 |
| 43            | 6             | 0           | -3.617558               | -1.302931 | -0.060021 |
| 44            | 6             | 0           | -0.581539               | -3.817016 | -2.717101 |
| 45            | 1             | 0           | -2.636637               | -3.740416 | -2.039287 |
| 46            | 1             | 0           | 1.495156                | -3.679736 | -3.235932 |
| 47            | 6             | 0           | -4.123527               | -0.307908 | 0.801200  |
| 48            | 1             | 0           | -4.281326               | -2.079762 | -0.427790 |
| 49            | 1             | 0           | -0.735516               | -4.719367 | -3.298973 |

|    |   |   |           |           |           |
|----|---|---|-----------|-----------|-----------|
| 50 | 6 | 0 | -3.266455 | 0.696380  | 1.269548  |
| 51 | 1 | 0 | -3.658494 | 1.463852  | 1.928511  |
| 52 | 6 | 0 | -1.926327 | 0.749481  | 0.908904  |
| 53 | 1 | 0 | -1.274642 | 1.540762  | 1.256596  |
| 54 | 6 | 0 | -5.584099 | -0.330420 | 1.203060  |
| 55 | 1 | 0 | -6.038378 | -1.204187 | 0.722117  |
| 56 | 6 | 0 | -5.749798 | -0.494716 | 2.719344  |
| 57 | 1 | 0 | -6.810793 | -0.568960 | 2.977162  |
| 58 | 1 | 0 | -5.246657 | -1.396938 | 3.079249  |
| 59 | 1 | 0 | -5.334477 | 0.362007  | 3.259844  |
| 60 | 6 | 0 | -6.325512 | 0.915215  | 0.700092  |
| 61 | 1 | 0 | -5.931135 | 1.825725  | 1.162699  |
| 62 | 1 | 0 | -6.234468 | 1.021569  | -0.384832 |
| 63 | 1 | 0 | -7.389081 | 0.847809  | 0.949152  |
| 64 | 1 | 0 | 0.296753  | 5.820570  | -1.337612 |
| 65 | 6 | 0 | 5.802215  | -2.202971 | 2.119006  |
| 66 | 1 | 0 | 6.130030  | -3.000720 | 1.440892  |
| 67 | 1 | 0 | 6.647958  | -1.518444 | 2.239273  |
| 68 | 1 | 0 | 5.600142  | -2.665073 | 3.089773  |

Step6

Method: cam-b3lyp/6-31+G(d,p) TD(NStates=1, Root=1)  
 SCRF(Solvent=THF,ExternalIteration,NonEquilibrium=Save)  
 After PCM corrections, the energy is -1318.78168378 a.u.

Excited State 1: Singlet-A 2.7647 eV 448.45 nm f=0.0426  
 <S\*\*2>=0.000  
 111 ->120 -0.11081  
 119 ->120 0.68271

Step7

Method: cam-b3lyp/6-31+G(d,p) SCRF(Solvent=THF, NonEquilibrium=Read)

SCF Done: E(RCAM-B3LYP) = -1318.87643495 a.u.

Results

|                 |   |            |          |            |
|-----------------|---|------------|----------|------------|
| Absorb Energy   | = | 0.158 a.u. | 4.292 eV | 288.867 nm |
| Emission Energy | = | 0.095 a.u. | 2.578 eV | 480.874 nm |
| Stokes Shift    | = | 0.063 a.u. | 1.714 eV | 192.007 nm |

Compound E-2b ACN

Step1

Method: cam-b3lyp/6-31G(d)  
 Solvent : Acetonitrile  
 SCF Done: E(RCAM-B3LYP) = -1318.81443232 a.u.  
 Lowest frequency = 21.3916

Standard orientation:

| Center Number | Atomic Number | Atomic Type | Coordinates (Angstroms) |   |   |
|---------------|---------------|-------------|-------------------------|---|---|
|               |               |             | X                       | Y | Z |

|    |   |   |           |           |           |
|----|---|---|-----------|-----------|-----------|
| 1  | 5 | 0 | 0.938238  | 0.460903  | -0.108342 |
| 2  | 6 | 0 | 3.330107  | 0.975689  | -1.953470 |
| 3  | 1 | 0 | 2.765187  | 0.360450  | -2.662929 |
| 4  | 1 | 0 | 2.792650  | 1.920681  | -1.845097 |
| 5  | 1 | 0 | 4.299677  | 1.188339  | -2.410861 |
| 6  | 6 | 0 | 1.428643  | 2.577149  | 2.044183  |
| 7  | 1 | 0 | 1.668479  | 3.465580  | 2.633849  |
| 8  | 1 | 0 | 0.684684  | 2.004412  | 2.609559  |
| 9  | 1 | 0 | 2.328774  | 1.961583  | 1.977508  |
| 10 | 6 | 0 | -0.281163 | 1.469319  | -2.650367 |
| 11 | 1 | 0 | 0.470075  | 0.689848  | -2.799179 |
| 12 | 1 | 0 | -1.228882 | 0.964443  | -2.435464 |
| 13 | 1 | 0 | -0.399221 | 2.000738  | -3.598273 |
| 14 | 6 | 0 | 0.152058  | 4.733297  | -0.790022 |
| 15 | 6 | 0 | 0.660873  | 4.314843  | 0.430748  |
| 16 | 1 | 0 | 0.878129  | 5.045128  | 1.205218  |
| 17 | 6 | 0 | 0.905761  | 2.964364  | 0.681247  |
| 18 | 6 | 0 | 0.618020  | 1.999805  | -0.308670 |
| 19 | 6 | 0 | 0.085062  | 2.433924  | -1.544530 |
| 20 | 6 | 0 | -0.128229 | 3.793456  | -1.771189 |
| 21 | 1 | 0 | -0.523236 | 4.115045  | -2.730939 |
| 22 | 6 | 0 | 2.659175  | -0.736047 | 1.406003  |
| 23 | 6 | 0 | 3.960292  | -1.105950 | 1.739814  |
| 24 | 1 | 0 | 4.132285  | -1.638996 | 2.672147  |
| 25 | 6 | 0 | 5.042897  | -0.818781 | 0.913863  |
| 26 | 6 | 0 | 4.789894  | -0.137222 | -0.272109 |
| 27 | 1 | 0 | 5.617756  | 0.089054  | -0.939924 |
| 28 | 6 | 0 | 3.505277  | 0.269679  | -0.629807 |
| 29 | 6 | 0 | 2.409372  | -0.027411 | 0.208046  |
| 30 | 6 | 0 | 1.552549  | -1.129333 | 2.359209  |
| 31 | 1 | 0 | 0.994656  | -1.992929 | 1.982221  |
| 32 | 1 | 0 | 1.965991  | -1.404772 | 3.332866  |
| 33 | 1 | 0 | 0.828943  | -0.326750 | 2.521640  |
| 34 | 7 | 0 | -0.127133 | -0.503518 | -0.215407 |
| 35 | 6 | 0 | -0.011230 | -1.867941 | -0.593620 |
| 36 | 6 | 0 | -1.509566 | -0.281223 | 0.028298  |
| 37 | 6 | 0 | -1.278727 | -2.475226 | -0.591529 |
| 38 | 6 | 0 | 1.111988  | -2.587039 | -1.001834 |
| 39 | 6 | 0 | -2.232265 | -1.463932 | -0.183442 |
| 40 | 6 | 0 | -1.431132 | -3.810357 | -0.960771 |
| 41 | 6 | 0 | 0.945717  | -3.917897 | -1.364067 |
| 42 | 1 | 0 | 2.091615  | -2.131733 | -1.041281 |
| 43 | 6 | 0 | -3.610046 | -1.507786 | 0.024153  |
| 44 | 6 | 0 | -0.310527 | -4.532178 | -1.341319 |
| 45 | 1 | 0 | -2.413531 | -4.272888 | -0.955775 |
| 46 | 1 | 0 | 1.814587  | -4.488357 | -1.677214 |
| 47 | 6 | 0 | -4.284056 | -0.372804 | 0.455857  |
| 48 | 1 | 0 | -4.156486 | -2.431921 | -0.145473 |
| 49 | 1 | 0 | -0.407632 | -5.573237 | -1.632024 |
| 50 | 6 | 0 | -3.539325 | 0.796350  | 0.684869  |
| 51 | 1 | 0 | -4.047949 | 1.689423  | 1.036272  |
| 52 | 6 | 0 | -2.167489 | 0.859790  | 0.487425  |
| 53 | 1 | 0 | -1.635077 | 1.778459  | 0.690813  |
| 54 | 6 | 0 | -5.784511 | -0.401311 | 0.684754  |
| 55 | 1 | 0 | -6.127000 | -1.414210 | 0.440653  |
| 56 | 6 | 0 | -6.142337 | -0.132788 | 2.151360  |
| 57 | 1 | 0 | -7.223487 | -0.213820 | 2.304593  |
| 58 | 1 | 0 | -5.648791 | -0.847698 | 2.816785  |
| 59 | 1 | 0 | -5.838051 | 0.874507  | 2.455457  |

|    |   |   |           |           |           |
|----|---|---|-----------|-----------|-----------|
| 60 | 6 | 0 | -6.519861 | 0.572345  | -0.243782 |
| 61 | 1 | 0 | -6.230742 | 1.608897  | -0.039559 |
| 62 | 1 | 0 | -6.296995 | 0.362620  | -1.294414 |
| 63 | 1 | 0 | -7.602904 | 0.495186  | -0.102405 |
| 64 | 1 | 0 | -0.023199 | 5.788580  | -0.977067 |
| 65 | 6 | 0 | 6.443934  | -1.209287 | 1.304589  |
| 66 | 1 | 0 | 7.078513  | -1.350845 | 0.425382  |
| 67 | 1 | 0 | 6.910495  | -0.432764 | 1.922052  |
| 68 | 1 | 0 | 6.452499  | -2.134934 | 1.887087  |

-----

### Step2

Method: cam-b3lyp/6-31+G(d,p) TD(NStates=3) SCRF(solvent=acetonitrile)

Excited State 1: Singlet-A 4.2985 eV 288.43 nm f=0.3049  
 <S\*\*2>=0.000  
 117 ->120 -0.10603  
 118 ->120 -0.17192  
 119 ->120 0.63902

### Step3

Method: cam-b3lyp/6-31+G(d,p)  
 SCRF(Solvent=acetonitrile,NonEquilibrium=Save)  
 SCF Done: E(RCAM-B3LYP) = -1318.89875049 a.u.

### Step4

Method: CAM-B3LYP/6-31+G(d,p) TD(NStates=1,Root=1)  
 SCRF(Solvent=acetonitrile,ExternalIteration,NonEquilibrium=Read)

After PCM corrections, the energy is -1318.74045688 a.u.

Excited State 1: Singlet-A 4.2947 eV 288.69 nm f=0.2414  
 <S\*\*2>=0.000  
 117 ->120 -0.11030  
 118 ->120 -0.19240  
 119 ->120 0.63458

### Step5

Method: cam-b3lyp/6-31G(d) opt freq(savenormalmodes)  
 TD(NStates=1,Root=1)

Total Energy, E(TD-HF/TD-DFT) = -1318.68180722 a.u.  
 Lowest frequency = 17.4777

### Standard orientation:

| Center Number | Atomic Number | Atomic Type | Coordinates (Angstroms) |          |           |
|---------------|---------------|-------------|-------------------------|----------|-----------|
|               |               |             | X                       | Y        | Z         |
| 1             | 5             | 0           | 1.028804                | 0.507769 | -0.135377 |
| 2             | 6             | 0           | 3.841729                | 1.146767 | -1.022690 |
| 3             | 1             | 0           | 3.186559                | 0.968038 | -1.881987 |
| 4             | 1             | 0           | 3.648125                | 2.174319 | -0.699381 |
| 5             | 1             | 0           | 4.880130                | 1.093388 | -1.362461 |
| 6             | 6             | 0           | 1.938711                | 2.718828 | 1.695824  |
| 7             | 1             | 0           | 2.008921                | 3.618767 | 2.313786  |

|    |   |   |           |           |           |
|----|---|---|-----------|-----------|-----------|
| 8  | 1 | 0 | 1.360337  | 1.966836  | 2.243850  |
| 9  | 1 | 0 | 2.947438  | 2.308618  | 1.586821  |
| 10 | 6 | 0 | -0.201010 | 1.445224  | -2.785784 |
| 11 | 1 | 0 | 0.585012  | 0.708143  | -2.985395 |
| 12 | 1 | 0 | -1.095196 | 0.883104  | -2.493650 |
| 13 | 1 | 0 | -0.434434 | 1.954307  | -3.725220 |
| 14 | 6 | 0 | 0.460751  | 4.768674  | -1.117181 |
| 15 | 6 | 0 | 1.090563  | 4.380035  | 0.059613  |
| 16 | 1 | 0 | 1.417093  | 5.137120  | 0.768549  |
| 17 | 6 | 0 | 1.297517  | 3.037456  | 0.366830  |
| 18 | 6 | 0 | 0.859602  | 2.013706  | -0.526966 |
| 19 | 6 | 0 | 0.228539  | 2.434949  | -1.733229 |
| 20 | 6 | 0 | 0.036399  | 3.788551  | -2.003456 |
| 21 | 1 | 0 | -0.440911 | 4.076397  | -2.937149 |
| 22 | 6 | 0 | 2.169162  | -1.167317 | 1.539454  |
| 23 | 6 | 0 | 3.304635  | -1.798078 | 2.043968  |
| 24 | 1 | 0 | 3.184946  | -2.541722 | 2.829648  |
| 25 | 6 | 0 | 4.584300  | -1.494066 | 1.592546  |
| 26 | 6 | 0 | 4.696576  | -0.513100 | 0.607928  |
| 27 | 1 | 0 | 5.685289  | -0.257926 | 0.230921  |
| 28 | 6 | 0 | 3.590085  | 0.140337  | 0.074165  |
| 29 | 6 | 0 | 2.272905  | -0.178476 | 0.521300  |
| 30 | 6 | 0 | 0.841156  | -1.528928 | 2.153205  |
| 31 | 1 | 0 | 0.216847  | -2.124871 | 1.477863  |
| 32 | 1 | 0 | 0.980659  | -2.116768 | 3.064825  |
| 33 | 1 | 0 | 0.264362  | -0.633217 | 2.410500  |
| 34 | 7 | 0 | -0.166687 | -0.398808 | -0.431844 |
| 35 | 6 | 0 | -0.165708 | -1.528221 | -1.246586 |
| 36 | 6 | 0 | -1.444983 | -0.250808 | 0.062052  |
| 37 | 6 | 0 | -1.450942 | -2.116903 | -1.274793 |
| 38 | 6 | 0 | 0.910185  | -2.068883 | -1.942717 |
| 39 | 6 | 0 | -2.292866 | -1.274569 | -0.426947 |
| 40 | 6 | 0 | -1.665567 | -3.260402 | -2.013292 |
| 41 | 6 | 0 | 0.673442  | -3.223903 | -2.691751 |
| 42 | 1 | 0 | 1.890367  | -1.611510 | -1.893602 |
| 43 | 6 | 0 | -3.619203 | -1.299622 | -0.061312 |
| 44 | 6 | 0 | -0.587251 | -3.809917 | -2.726428 |
| 45 | 1 | 0 | -2.641870 | -3.732556 | -2.047533 |
| 46 | 1 | 0 | 1.488157  | -3.671185 | -3.250591 |
| 47 | 6 | 0 | -4.124090 | -0.305998 | 0.802267  |
| 48 | 1 | 0 | -4.283435 | -2.075359 | -0.430124 |
| 49 | 1 | 0 | -0.743085 | -4.710099 | -3.311072 |
| 50 | 6 | 0 | -3.265737 | 0.695333  | 1.274567  |
| 51 | 1 | 0 | -3.656236 | 1.460338  | 1.937315  |
| 52 | 6 | 0 | -1.925138 | 0.747193  | 0.914461  |
| 53 | 1 | 0 | -1.271441 | 1.533939  | 1.268996  |
| 54 | 6 | 0 | -5.584800 | -0.328018 | 1.203566  |
| 55 | 1 | 0 | -6.040107 | -1.199047 | 0.719027  |
| 56 | 6 | 0 | -5.751108 | -0.497914 | 2.719166  |
| 57 | 1 | 0 | -6.812409 | -0.571590 | 2.975857  |
| 58 | 1 | 0 | -5.249815 | -1.402706 | 3.075275  |
| 59 | 1 | 0 | -5.334681 | 0.356105  | 3.263154  |
| 60 | 6 | 0 | -6.323860 | 0.920921  | 0.705372  |
| 61 | 1 | 0 | -5.928142 | 1.828917  | 1.171903  |
| 62 | 1 | 0 | -6.232556 | 1.030810  | -0.379224 |
| 63 | 1 | 0 | -7.387557 | 0.853897  | 0.953924  |
| 64 | 1 | 0 | 0.306468  | 5.820345  | -1.339694 |
| 65 | 6 | 0 | 5.798858  | -2.205948 | 2.127921  |
| 66 | 1 | 0 | 6.123725  | -3.008429 | 1.454054  |
| 67 | 1 | 0 | 6.646630  | -1.523034 | 2.242723  |

68 1 0 5.596507 -2.661969 3.101452

Step6

Method: cam-b3lyp/6-31+G(d,p) TD(NStates=1, Root=1)  
SCRF(Solvent=acetonitrile,ExternalIteration,NonEquilibrium=Save)  
After PCM corrections, the energy is -1318.78593024 a.u.

Excited State 1: Singlet-A 2.7214 eV 455.60 nm f=0.0435  
<S\*\*2>=0.000  
111 ->120 -0.10988  
119 ->120 0.68258

Step7

Method: cam-b3lyp/6-31+G(d,p) SCRF(Solvent=acetonitrile,  
NonEquilibrium=Read)

SCF Done: E(RCAM-B3LYP) = -1318.87666374 a.u.

Results

| Property        | Value      | Value    | Value      |
|-----------------|------------|----------|------------|
| Absorb Energy   | 0.158 a.u. | 4.307 eV | 287.841 nm |
| Emission Energy | 0.091 a.u. | 2.469 eV | 502.167 nm |
| Stokes Shift    | 0.068 a.u. | 1.838 eV | 214.326 nm |

Compound 3 n-hexane

Step1

Method: cam-b3lyp/6-31G(d)  
Solvent : n-Hexane  
SCF Done: E(RCAM-B3LYP) = -1472.58034145 a.u.  
Lowest frequency = 19.0630

Standard orientation:

| Center Number | Atomic Number | Atomic Type | Coordinates (Angstroms) |           |           |
|---------------|---------------|-------------|-------------------------|-----------|-----------|
|               |               |             | X                       | Y         | Z         |
| 1             | 6             | 0           | 1.736475                | 1.946576  | -0.287227 |
| 2             | 6             | 0           | 2.407101                | 0.710493  | 0.056853  |
| 3             | 6             | 0           | 1.416186                | -0.275036 | 0.175635  |
| 4             | 7             | 0           | 0.135808                | 0.289770  | -0.063650 |
| 5             | 6             | 0           | 0.366626                | 1.665942  | -0.343754 |
| 6             | 6             | 0           | -0.531171               | 2.670000  | -0.714162 |
| 7             | 6             | 0           | -0.038490               | 3.934183  | -0.979012 |
| 8             | 6             | 0           | 1.333840                | 4.220870  | -0.899449 |
| 9             | 6             | 0           | 2.234782                | 3.223059  | -0.558535 |
| 10            | 6             | 0           | 3.748547                | 0.406111  | 0.280755  |
| 11            | 6             | 0           | 4.119486                | -0.883567 | 0.635091  |
| 12            | 6             | 0           | 3.110726                | -1.851704 | 0.769590  |
| 13            | 6             | 0           | 1.770034                | -1.569823 | 0.555077  |
| 14            | 6             | 0           | 5.576083                | -1.232932 | 0.880560  |
| 15            | 6             | 0           | 5.819484                | -1.679758 | 2.326911  |

|    |   |   |           |           |           |
|----|---|---|-----------|-----------|-----------|
| 16 | 6 | 0 | 6.083228  | -2.287462 | -0.110154 |
| 17 | 8 | 0 | 1.676634  | 5.507909  | -1.185844 |
| 18 | 6 | 0 | 3.043216  | 5.854538  | -1.126857 |
| 19 | 1 | 0 | -1.592412 | 2.480355  | -0.795281 |
| 20 | 1 | 0 | -0.709355 | 4.737843  | -1.262349 |
| 21 | 1 | 0 | 3.300314  | 3.410492  | -0.507885 |
| 22 | 1 | 0 | 4.505504  | 1.180507  | 0.184583  |
| 23 | 1 | 0 | 3.381466  | -2.863402 | 1.057813  |
| 24 | 1 | 0 | 1.027559  | -2.345430 | 0.681586  |
| 25 | 1 | 0 | 6.157745  | -0.317446 | 0.715345  |
| 26 | 1 | 0 | 6.883844  | -1.872287 | 2.498286  |
| 27 | 1 | 0 | 5.491052  | -0.915708 | 3.037807  |
| 28 | 1 | 0 | 5.274631  | -2.602515 | 2.553164  |
| 29 | 1 | 0 | 7.149292  | -2.483687 | 0.045783  |
| 30 | 1 | 0 | 5.943379  | -1.958761 | -1.144282 |
| 31 | 1 | 0 | 5.549376  | -3.235744 | 0.013727  |
| 32 | 1 | 0 | 3.099951  | 6.913181  | -1.381510 |
| 33 | 1 | 0 | 3.636235  | 5.277575  | -1.846827 |
| 34 | 1 | 0 | 3.453711  | 5.702091  | -0.121289 |
| 35 | 5 | 0 | -1.133288 | -0.387095 | -0.023187 |
| 36 | 6 | 0 | -1.200560 | -1.942842 | -0.305932 |
| 37 | 6 | 0 | -0.750659 | -2.442997 | -1.548724 |
| 38 | 6 | 0 | -1.764509 | -2.853398 | 0.612512  |
| 39 | 6 | 0 | -0.883840 | -3.797699 | -1.845139 |
| 40 | 6 | 0 | -1.858793 | -4.205438 | 0.288743  |
| 41 | 6 | 0 | -1.427211 | -4.700341 | -0.937212 |
| 42 | 1 | 0 | -0.549420 | -4.158517 | -2.815250 |
| 43 | 1 | 0 | -2.289950 | -4.890935 | 1.014717  |
| 44 | 6 | 0 | -2.446567 | 0.434137  | 0.301952  |
| 45 | 6 | 0 | -3.560763 | 0.451023  | -0.563679 |
| 46 | 6 | 0 | -2.548276 | 1.122463  | 1.532096  |
| 47 | 6 | 0 | -4.716165 | 1.141435  | -0.202945 |
| 48 | 6 | 0 | -3.728904 | 1.781673  | 1.867209  |
| 49 | 6 | 0 | -4.823824 | 1.812818  | 1.010233  |
| 50 | 1 | 0 | -5.560131 | 1.148248  | -0.888854 |
| 51 | 1 | 0 | -3.792943 | 2.289165  | 2.827123  |
| 52 | 6 | 0 | -2.240841 | -2.415822 | 1.977358  |
| 53 | 1 | 0 | -1.415522 | -2.028459 | 2.585338  |
| 54 | 1 | 0 | -2.993094 | -1.625949 | 1.912902  |
| 55 | 1 | 0 | -2.677923 | -3.255952 | 2.523261  |
| 56 | 6 | 0 | -0.109588 | -1.556765 | -2.593128 |
| 57 | 1 | 0 | -0.620707 | -0.597857 | -2.707821 |
| 58 | 1 | 0 | 0.931520  | -1.335227 | -2.336021 |
| 59 | 1 | 0 | -0.109887 | -2.051405 | -3.568127 |
| 60 | 6 | 0 | -1.524824 | -6.167589 | -1.262629 |
| 61 | 1 | 0 | -1.672461 | -6.330029 | -2.334140 |
| 62 | 1 | 0 | -0.608025 | -6.696736 | -0.976951 |
| 63 | 1 | 0 | -2.353562 | -6.641016 | -0.728601 |
| 64 | 6 | 0 | -1.406461 | 1.183086  | 2.521865  |
| 65 | 1 | 0 | -0.897670 | 0.223453  | 2.641226  |
| 66 | 1 | 0 | -0.649892 | 1.909235  | 2.206826  |
| 67 | 1 | 0 | -1.768665 | 1.491012  | 3.506367  |
| 68 | 6 | 0 | -3.533579 | -0.230164 | -1.911506 |
| 69 | 1 | 0 | -2.778465 | 0.212519  | -2.570700 |
| 70 | 1 | 0 | -3.303091 | -1.294778 | -1.825663 |
| 71 | 1 | 0 | -4.499046 | -0.132251 | -2.414635 |
| 72 | 6 | 0 | -6.075715 | 2.566507  | 1.374719  |
| 73 | 1 | 0 | -6.013534 | 3.612772  | 1.052937  |
| 74 | 1 | 0 | -6.957789 | 2.130963  | 0.896838  |
| 75 | 1 | 0 | -6.239773 | 2.569026  | 2.456108  |

-----  
Step2

Method: cam-b3lyp/6-31+G(d,p) TD(NStates=3) SCRF(solvent=n-hexane)

Excited State 1: Singlet-A 4.1967 eV 295.43 nm f=0.3858  
<S\*\*2>=0.000  
128 ->132 -0.10792  
130 ->132 -0.17540  
131 ->132 0.63008  
131 ->133 0.10706

Step3

Method: cam-b3lyp/6-31+G(d,p) SCRF(Solvent=n-hexane,NonEquilibrium=Save)  
SCF Done: E(RCAM-B3LYP) = -1472.67321682 a.u.

Step4

Method: CAM-B3LYP/6-31+G(d,p) TD(NStates=1,Root=1)  
SCRF(Solvent=n-hexane,ExternalIteration,NonEquilibrium=Read)

After PCM corrections, the energy is -1472.52023867 a.u.

Excited State 1: Singlet-A 4.1774 eV 296.80 nm f=0.2923  
<S\*\*2>=0.000  
128 ->132 0.12290  
130 ->132 0.16653  
131 ->132 -0.63942

Step5

Method: cam-b3lyp/6-31G(d) opt freq(savenormalmodes)  
TD(NStates=1,Root=1)

Total Energy, E(TD-HF/TD-DFT) = -1472.45320976 a.u.  
Lowest frequency = 19.2514

Standard orientation:

-----

| Center<br>Number | Atomic<br>Number | Atomic<br>Type | Coordinates (Angstroms) |           |           |
|------------------|------------------|----------------|-------------------------|-----------|-----------|
|                  |                  |                | X                       | Y         | Z         |
| 1                | 6                | 0              | 1.968197                | 1.595169  | -0.589856 |
| 2                | 6                | 0              | 2.464654                | 0.424461  | 0.124058  |
| 3                | 6                | 0              | 1.328000                | -0.355330 | 0.413213  |
| 4                | 7                | 0              | 0.174252                | 0.259191  | -0.084266 |
| 5                | 6                | 0              | 0.556766                | 1.418521  | -0.680058 |
| 6                | 6                | 0              | -0.256923               | 2.384316  | -1.305160 |
| 7                | 6                | 0              | 0.354452                | 3.490439  | -1.845720 |
| 8                | 6                | 0              | 1.752213                | 3.662637  | -1.764690 |
| 9                | 6                | 0              | 2.571514                | 2.709488  | -1.126350 |
| 10               | 6                | 0              | 3.717968                | -0.005741 | 0.514250  |
| 11               | 6                | 0              | 3.853543                | -1.223391 | 1.201280  |
| 12               | 6                | 0              | 2.708656                | -1.979555 | 1.467641  |
| 13               | 6                | 0              | 1.434680                | -1.569464 | 1.075506  |
| 14               | 6                | 0              | 5.225975                | -1.704889 | 1.633890  |
| 15               | 6                | 0              | 5.327847                | -1.832873 | 3.158684  |
| 16               | 6                | 0              | 5.608160                | -3.020933 | 0.945429  |

-----



|    |   |   |           |           |           |
|----|---|---|-----------|-----------|-----------|
| 17 | 8 | 0 | 2.219282  | 4.788285  | -2.323973 |
| 18 | 6 | 0 | 3.612360  | 5.061565  | -2.284607 |
| 19 | 1 | 0 | -1.330864 | 2.256715  | -1.335468 |
| 20 | 1 | 0 | -0.219735 | 4.267333  | -2.336306 |
| 21 | 1 | 0 | 3.642893  | 2.848734  | -1.057975 |
| 22 | 1 | 0 | 4.602540  | 0.585815  | 0.293735  |
| 23 | 1 | 0 | 2.807997  | -2.925172 | 1.991213  |
| 24 | 1 | 0 | 0.559300  | -2.178190 | 1.263957  |
| 25 | 1 | 0 | 5.949020  | -0.943454 | 1.316807  |
| 26 | 1 | 0 | 6.341919  | -2.123174 | 3.451461  |
| 27 | 1 | 0 | 5.085925  | -0.888080 | 3.654281  |
| 28 | 1 | 0 | 4.640929  | -2.595966 | 3.539146  |
| 29 | 1 | 0 | 6.623718  | -3.318665 | 1.225395  |
| 30 | 1 | 0 | 5.567066  | -2.926633 | -0.143666 |
| 31 | 1 | 0 | 4.931678  | -3.831134 | 1.236669  |
| 32 | 1 | 0 | 3.740981  | 6.014799  | -2.794965 |
| 33 | 1 | 0 | 4.180643  | 4.286677  | -2.808548 |
| 34 | 1 | 0 | 3.967218  | 5.148283  | -1.252829 |
| 35 | 5 | 0 | -1.270631 | -0.286635 | -0.011176 |
| 36 | 6 | 0 | -1.515790 | -1.675897 | -0.675570 |
| 37 | 6 | 0 | -0.914909 | -2.083818 | -1.900422 |
| 38 | 6 | 0 | -2.349764 | -2.638396 | -0.028305 |
| 39 | 6 | 0 | -1.134714 | -3.356961 | -2.418507 |
| 40 | 6 | 0 | -2.542342 | -3.898579 | -0.584369 |
| 41 | 6 | 0 | -1.943317 | -4.289951 | -1.779630 |
| 42 | 1 | 0 | -0.670009 | -3.623415 | -3.366109 |
| 43 | 1 | 0 | -3.174767 | -4.609859 | -0.056083 |
| 44 | 6 | 0 | -2.292595 | 0.631139  | 0.725777  |
| 45 | 6 | 0 | -3.597053 | 0.834145  | 0.180290  |
| 46 | 6 | 0 | -1.984223 | 1.352454  | 1.914043  |
| 47 | 6 | 0 | -4.491978 | 1.706807  | 0.789537  |
| 48 | 6 | 0 | -2.911670 | 2.216881  | 2.488794  |
| 49 | 6 | 0 | -4.175250 | 2.418664  | 1.944997  |
| 50 | 1 | 0 | -5.472255 | 1.847561  | 0.337600  |
| 51 | 1 | 0 | -2.643800 | 2.737083  | 3.406710  |
| 52 | 6 | 0 | -3.012322 | -2.363630 | 1.300698  |
| 53 | 1 | 0 | -2.303257 | -1.940470 | 2.019875  |
| 54 | 1 | 0 | -3.830264 | -1.640976 | 1.223415  |
| 55 | 1 | 0 | -3.421678 | -3.286642 | 1.722037  |
| 56 | 6 | 0 | -0.069837 | -1.142330 | -2.720416 |
| 57 | 1 | 0 | -0.549511 | -0.162431 | -2.824388 |
| 58 | 1 | 0 | 0.917106  | -0.970916 | -2.276389 |
| 59 | 1 | 0 | 0.094778  | -1.544264 | -3.724261 |
| 60 | 6 | 0 | -2.146436 | -5.672673 | -2.340514 |
| 61 | 1 | 0 | -1.928088 | -5.703820 | -3.412217 |
| 62 | 1 | 0 | -1.491380 | -6.406339 | -1.853963 |
| 63 | 1 | 0 | -3.175474 | -6.017415 | -2.196294 |
| 64 | 6 | 0 | -0.675699 | 1.157933  | 2.637845  |
| 65 | 1 | 0 | -0.424056 | 0.095190  | 2.727609  |
| 66 | 1 | 0 | 0.165437  | 1.640675  | 2.128073  |
| 67 | 1 | 0 | -0.724071 | 1.578487  | 3.646473  |
| 68 | 6 | 0 | -4.041663 | 0.165384  | -1.098201 |
| 69 | 1 | 0 | -3.290424 | 0.278203  | -1.887560 |
| 70 | 1 | 0 | -4.192990 | -0.911752 | -0.979660 |
| 71 | 1 | 0 | -4.982246 | 0.598518  | -1.451288 |
| 72 | 6 | 0 | -5.155966 | 3.378786  | 2.564696  |
| 73 | 1 | 0 | -5.162708 | 4.343378  | 2.041625  |
| 74 | 1 | 0 | -6.178146 | 2.988273  | 2.528246  |
| 75 | 1 | 0 | -4.909510 | 3.579321  | 3.611664  |

Step6

Method: cam-b3lyp/6-31+G(d,p) TD(NStates=1, Root=1)  
 SCRF(Solvent=n-hexane,ExternalIteration,NonEquilibrium=Save)  
 After PCM corrections, the energy is -1472.55468574 a.u.

Excited State 1: Singlet-A 2.6902 eV 460.88 nm f=0.0430  
 <S\*\*2>=0.000  
 123 ->132 -0.10790  
 131 ->132 0.68027

Step7

Method: cam-b3lyp/6-31+G(d,p) SCRF(Solvent=n-hexane,  
 NonEquilibrium=Read)

SCF Done: E(RCAM-B3LYP) = -1472.65176275 a.u.

Results

| Results         |   |            |          |            |
|-----------------|---|------------|----------|------------|
| Absorb Energy   | = | 0.153 a.u. | 4.163 eV | 297.842 nm |
| Emission Energy | = | 0.097 a.u. | 2.642 eV | 469.353 nm |
| Stokes Shift    | = | 0.056 a.u. | 1.521 eV | 171.510 nm |

Compound 3 THF

Step1

Method: cam-b3lyp/6-31G(d)  
 Solvent : TetraHydroFuran  
 SCF Done: E(RCAM-B3LYP) = -1472.58418081 a.u.  
 Lowest frequency = 19.4662

Standard orientation:

| Center Number | Atomic Number | Atomic Type | Coordinates (Angstroms) |           |           |
|---------------|---------------|-------------|-------------------------|-----------|-----------|
|               |               |             | X                       | Y         | Z         |
| 1             | 6             | 0           | 1.723028                | 1.954955  | -0.289264 |
| 2             | 6             | 0           | 2.400667                | 0.722608  | 0.055733  |
| 3             | 6             | 0           | 1.414915                | -0.268489 | 0.174124  |
| 4             | 7             | 0           | 0.131597                | 0.288779  | -0.066225 |
| 5             | 6             | 0           | 0.354540                | 1.665698  | -0.347041 |
| 6             | 6             | 0           | -0.548427               | 2.664052  | -0.720362 |
| 7             | 6             | 0           | -0.062666               | 3.931404  | -0.985341 |
| 8             | 6             | 0           | 1.308199                | 4.226749  | -0.903196 |
| 9             | 6             | 0           | 2.214914                | 3.234218  | -0.560458 |
| 10            | 6             | 0           | 3.744360                | 0.426678  | 0.280677  |
| 11            | 6             | 0           | 4.122381                | -0.861046 | 0.636064  |
| 12            | 6             | 0           | 3.118691                | -1.835190 | 0.770893  |
| 13            | 6             | 0           | 1.776270                | -1.561058 | 0.555168  |
| 14            | 6             | 0           | 5.580915                | -1.201859 | 0.882902  |
| 15            | 6             | 0           | 5.825627                | -1.645271 | 2.330152  |
| 16            | 6             | 0           | 6.094065                | -2.255847 | -0.105395 |
| 17            | 8             | 0           | 1.644350                | 5.515362  | -1.189377 |
| 18            | 6             | 0           | 3.011832                | 5.870790  | -1.126516 |

|    |   |   |           |           |           |
|----|---|---|-----------|-----------|-----------|
| 19 | 1 | 0 | -1.608096 | 2.467709  | -0.805561 |
| 20 | 1 | 0 | -0.739409 | 4.729435  | -1.271258 |
| 21 | 1 | 0 | 3.279180  | 3.428087  | -0.508648 |
| 22 | 1 | 0 | 4.496516  | 1.205621  | 0.184619  |
| 23 | 1 | 0 | 3.394844  | -2.844927 | 1.060747  |
| 24 | 1 | 0 | 1.038140  | -2.340440 | 0.683785  |
| 25 | 1 | 0 | 6.157362  | -0.283634 | 0.716399  |
| 26 | 1 | 0 | 6.891014  | -1.831735 | 2.501171  |
| 27 | 1 | 0 | 5.494319  | -0.881131 | 3.039847  |
| 28 | 1 | 0 | 5.285642  | -2.570660 | 2.557534  |
| 29 | 1 | 0 | 7.160984  | -2.445160 | 0.052479  |
| 30 | 1 | 0 | 5.954479  | -1.929504 | -1.140460 |
| 31 | 1 | 0 | 5.565488  | -3.206891 | 0.020370  |
| 32 | 1 | 0 | 3.062686  | 6.929440  | -1.381264 |
| 33 | 1 | 0 | 3.608631  | 5.296638  | -1.844626 |
| 34 | 1 | 0 | 3.418714  | 5.720453  | -0.119859 |
| 35 | 5 | 0 | -1.134413 | -0.395128 | -0.024536 |
| 36 | 6 | 0 | -1.191929 | -1.951121 | -0.309048 |
| 37 | 6 | 0 | -0.745815 | -2.444189 | -1.556476 |
| 38 | 6 | 0 | -1.739584 | -2.869566 | 0.611502  |
| 39 | 6 | 0 | -0.867431 | -3.799637 | -1.855488 |
| 40 | 6 | 0 | -1.823592 | -4.222108 | 0.284754  |
| 41 | 6 | 0 | -1.395660 | -4.710156 | -0.945573 |
| 42 | 1 | 0 | -0.536854 | -4.154797 | -2.828955 |
| 43 | 1 | 0 | -2.242778 | -4.913485 | 1.012116  |
| 44 | 6 | 0 | -2.450492 | 0.420640  | 0.304344  |
| 45 | 6 | 0 | -3.564649 | 0.442968  | -0.561304 |
| 46 | 6 | 0 | -2.552851 | 1.100863  | 1.539398  |
| 47 | 6 | 0 | -4.721715 | 1.128761  | -0.195080 |
| 48 | 6 | 0 | -3.734295 | 1.756538  | 1.879535  |
| 49 | 6 | 0 | -4.830124 | 1.791890  | 1.022911  |
| 50 | 1 | 0 | -5.565833 | 1.139002  | -0.880715 |
| 51 | 1 | 0 | -3.799049 | 2.256835  | 2.843131  |
| 52 | 6 | 0 | -2.204678 | -2.441820 | 1.983324  |
| 53 | 1 | 0 | -1.368798 | -2.084174 | 2.595232  |
| 54 | 1 | 0 | -2.937314 | -1.632846 | 1.932546  |
| 55 | 1 | 0 | -2.660918 | -3.279460 | 2.517068  |
| 56 | 6 | 0 | -0.122906 | -1.547984 | -2.603575 |
| 57 | 1 | 0 | -0.656186 | -0.601624 | -2.722541 |
| 58 | 1 | 0 | 0.912638  | -1.301864 | -2.346272 |
| 59 | 1 | 0 | -0.110668 | -2.046335 | -3.576472 |
| 60 | 6 | 0 | -1.481510 | -6.177521 | -1.273999 |
| 61 | 1 | 0 | -1.634677 | -6.338570 | -2.344864 |
| 62 | 1 | 0 | -0.557250 | -6.697697 | -0.996202 |
| 63 | 1 | 0 | -2.301075 | -6.660183 | -0.734275 |
| 64 | 6 | 0 | -1.410866 | 1.154496  | 2.529660  |
| 65 | 1 | 0 | -0.910748 | 0.190523  | 2.651403  |
| 66 | 1 | 0 | -0.647835 | 1.873446  | 2.213515  |
| 67 | 1 | 0 | -1.770881 | 1.467862  | 3.513127  |
| 68 | 6 | 0 | -3.534867 | -0.222086 | -1.917095 |
| 69 | 1 | 0 | -2.808374 | 0.257989  | -2.582484 |
| 70 | 1 | 0 | -3.261708 | -1.277706 | -1.848363 |
| 71 | 1 | 0 | -4.511528 | -0.155507 | -2.403276 |
| 72 | 6 | 0 | -6.083262 | 2.540682  | 1.393446  |
| 73 | 1 | 0 | -6.021679 | 3.589672  | 1.080680  |
| 74 | 1 | 0 | -6.964214 | 2.108585  | 0.910590  |
| 75 | 1 | 0 | -6.247171 | 2.534076  | 2.474770  |

-----

Step2

Method: cam-b3lyp/6-31+G(d,p) TD(NStates=3) SCRF(solvent=THF)

Excited State 1: Singlet-A 4.2070 eV 294.71 nm f=0.3935  
<S\*\*2>=0.000  
128 ->132 -0.10707  
130 ->132 -0.16593  
131 ->132 0.63014  
131 ->133 0.11886

Step3

Method: cam-b3lyp/6-31+G(d,p) SCRF(Solvent=THF,NonEquilibrium=Save)  
SCF Done: E(RCAM-B3LYP) = -1472.67750689 a.u.

Step4

Method: CAM-B3LYP/6-31+G(d,p) TD(NStates=1,Root=1)  
SCRF(Solvent=THF,ExternalIteration,NonEquilibrium=Read)

After PCM corrections, the energy is -1472.52343268 a.u.

Excited State 1: Singlet-A 4.1922 eV 295.75 nm f=0.2965  
<S\*\*2>=0.000  
128 ->132 -0.12306  
130 ->132 -0.16057  
131 ->132 0.63890

Step5

Method: cam-b3lyp/6-31G(d) opt freq(savenormalmodes)  
TD(NStates=1,Root=1)

Total Energy, E(TD-HF/TD-DFT) = -1472.45578923 a.u.  
Lowest frequency = 19.7458

Standard orientation:

| Center<br>Number | Atomic<br>Number | Atomic<br>Type | Coordinates (Angstroms) |           |           |
|------------------|------------------|----------------|-------------------------|-----------|-----------|
|                  |                  |                | X                       | Y         | Z         |
| 1                | 6                | 0              | 1.959332                | 1.603678  | -0.586182 |
| 2                | 6                | 0              | 2.462300                | 0.429632  | 0.120116  |
| 3                | 6                | 0              | 1.330362                | -0.357457 | 0.408025  |
| 4                | 7                | 0              | 0.171718                | 0.253951  | -0.086156 |
| 5                | 6                | 0              | 0.550578                | 1.421922  | -0.677943 |
| 6                | 6                | 0              | -0.265169               | 2.381329  | -1.306654 |
| 7                | 6                | 0              | 0.342155                | 3.494171  | -1.840822 |
| 8                | 6                | 0              | 1.738144                | 3.674857  | -1.752862 |
| 9                | 6                | 0              | 2.560232                | 2.721948  | -1.116547 |
| 10               | 6                | 0              | 3.718297                | 0.005177  | 0.506344  |
| 11               | 6                | 0              | 3.860991                | -1.214846 | 1.189629  |
| 12               | 6                | 0              | 2.720504                | -1.976419 | 1.459821  |
| 13               | 6                | 0              | 1.443392                | -1.570104 | 1.072366  |
| 14               | 6                | 0              | 5.237281                | -1.690363 | 1.616245  |
| 15               | 6                | 0              | 5.345627                | -1.818342 | 3.140651  |
| 16               | 6                | 0              | 5.621280                | -3.005026 | 0.926075  |
| 17               | 8                | 0              | 2.201780                | 4.803658  | -2.305651 |
| 18               | 6                | 0              | 3.597045                | 5.082390  | -2.261701 |
| 19               | 1                | 0              | -1.337823               | 2.245356  | -1.351521 |

|    |   |   |           |           |           |
|----|---|---|-----------|-----------|-----------|
| 20 | 1 | 0 | -0.235899 | 4.266129  | -2.334856 |
| 21 | 1 | 0 | 3.630938  | 2.863962  | -1.046883 |
| 22 | 1 | 0 | 4.598596  | 0.602771  | 0.286597  |
| 23 | 1 | 0 | 2.824823  | -2.921007 | 1.984210  |
| 24 | 1 | 0 | 0.570602  | -2.179402 | 1.271512  |
| 25 | 1 | 0 | 5.955294  | -0.926100 | 1.296104  |
| 26 | 1 | 0 | 6.362405  | -2.104573 | 3.427799  |
| 27 | 1 | 0 | 5.103451  | -0.873858 | 3.636915  |
| 28 | 1 | 0 | 4.663373  | -2.584359 | 3.523837  |
| 29 | 1 | 0 | 6.639363  | -3.297495 | 1.202142  |
| 30 | 1 | 0 | 5.576293  | -2.909968 | -0.162911 |
| 31 | 1 | 0 | 4.949484  | -3.818041 | 1.220643  |
| 32 | 1 | 0 | 3.722468  | 6.038256  | -2.767404 |
| 33 | 1 | 0 | 4.167328  | 4.311424  | -2.787916 |
| 34 | 1 | 0 | 3.947173  | 5.165121  | -1.228669 |
| 35 | 5 | 0 | -1.262213 | -0.291672 | -0.010156 |
| 36 | 6 | 0 | -1.511998 | -1.687287 | -0.666005 |
| 37 | 6 | 0 | -0.908239 | -2.099434 | -1.888265 |
| 38 | 6 | 0 | -2.351080 | -2.645633 | -0.019910 |
| 39 | 6 | 0 | -1.124186 | -3.376718 | -2.400672 |
| 40 | 6 | 0 | -2.540652 | -3.909501 | -0.569763 |
| 41 | 6 | 0 | -1.934275 | -4.307716 | -1.759997 |
| 42 | 1 | 0 | -0.654747 | -3.647674 | -3.344684 |
| 43 | 1 | 0 | -3.175580 | -4.618278 | -0.040997 |
| 44 | 6 | 0 | -2.292691 | 0.629255  | 0.719151  |
| 45 | 6 | 0 | -3.591648 | 0.837223  | 0.164655  |
| 46 | 6 | 0 | -1.991791 | 1.343256  | 1.913390  |
| 47 | 6 | 0 | -4.490850 | 1.708901  | 0.770362  |
| 48 | 6 | 0 | -2.922417 | 2.208114  | 2.485002  |
| 49 | 6 | 0 | -4.181665 | 2.415066  | 1.932149  |
| 50 | 1 | 0 | -5.466791 | 1.854766  | 0.310625  |
| 51 | 1 | 0 | -2.659885 | 2.725013  | 3.406322  |
| 52 | 6 | 0 | -3.024997 | -2.360998 | 1.301185  |
| 53 | 1 | 0 | -2.324368 | -1.921182 | 2.018278  |
| 54 | 1 | 0 | -3.849580 | -1.647551 | 1.206635  |
| 55 | 1 | 0 | -3.428916 | -3.282047 | 1.731903  |
| 56 | 6 | 0 | -0.063898 | -1.159163 | -2.710448 |
| 57 | 1 | 0 | -0.546646 | -0.181308 | -2.819257 |
| 58 | 1 | 0 | 0.920362  | -0.980464 | -2.263310 |
| 59 | 1 | 0 | 0.106168  | -1.565598 | -3.711579 |
| 60 | 6 | 0 | -2.132819 | -5.694354 | -2.313617 |
| 61 | 1 | 0 | -1.909629 | -5.731683 | -3.384047 |
| 62 | 1 | 0 | -1.478267 | -6.423497 | -1.819816 |
| 63 | 1 | 0 | -3.161456 | -6.040604 | -2.170483 |
| 64 | 6 | 0 | -0.687781 | 1.144078  | 2.643976  |
| 65 | 1 | 0 | -0.445306 | 0.079911  | 2.744279  |
| 66 | 1 | 0 | 0.158521  | 1.613526  | 2.130319  |
| 67 | 1 | 0 | -0.734980 | 1.575910  | 3.647874  |
| 68 | 6 | 0 | -4.024410 | 0.174851  | -1.121213 |
| 69 | 1 | 0 | -3.262806 | 0.289954  | -1.900445 |
| 70 | 1 | 0 | -4.179932 | -0.902311 | -1.006608 |
| 71 | 1 | 0 | -4.959743 | 0.611538  | -1.483650 |
| 72 | 6 | 0 | -5.165266 | 3.374969  | 2.548424  |
| 73 | 1 | 0 | -5.164230 | 4.341914  | 2.029877  |
| 74 | 1 | 0 | -6.188331 | 2.988224  | 2.500186  |
| 75 | 1 | 0 | -4.927036 | 3.569907  | 3.598266  |

-----

Step6

Method: cam-b3lyp/6-31+G(d,p) TD(NStates=1, Root=1)  
 SCRF(Solvent=THF,ExternalIteration,NonEquilibrium=Save)  
 After PCM corrections, the energy is -1472.56810644 a.u.

Excited State 1: Singlet-A 2.5539 eV 485.46 nm f=0.0479  
 <S\*\*2>=0.000  
 123 ->132 -0.10457  
 131 ->132 0.68053

Step7

Method: cam-b3lyp/6-31+G(d,p) SCRF(Solvent=THF, NonEquilibrium=Read)

SCF Done: E(RCAM-B3LYP) = -1472.65375269 a.u.

Results

| -----           |   |            |          |            |
|-----------------|---|------------|----------|------------|
| Absorb Energy   | = | 0.154 a.u. | 4.193 eV | 295.723 nm |
| -----           |   |            |          |            |
| Emission Energy | = | 0.086 a.u. | 2.331 eV | 531.995 nm |
| -----           |   |            |          |            |
| Stokes Shift    | = | 0.068 a.u. | 1.862 eV | 236.271 nm |
| -----           |   |            |          |            |

Compound 3 ACN

Step1

Method: cam-b3lyp/6-31G(d)  
 Solvent : Acetonitrile  
 SCF Done: E(RCAM-B3LYP) = -1472.58576987 a.u.  
 Lowest frequency = 19.6517

Standard orientation:

| -----            |                  |                |                         |           |           |  |
|------------------|------------------|----------------|-------------------------|-----------|-----------|--|
| Center<br>Number | Atomic<br>Number | Atomic<br>Type | Coordinates (Angstroms) |           |           |  |
|                  |                  |                | X                       | Y         | Z         |  |
| -----            |                  |                |                         |           |           |  |
| 1                | 6                | 0              | 1.713445                | 1.960947  | -0.289273 |  |
| 2                | 6                | 0              | 2.395975                | 0.731630  | 0.057389  |  |
| 3                | 6                | 0              | 1.413870                | -0.263106 | 0.177198  |  |
| 4                | 7                | 0              | 0.128586                | 0.288628  | -0.064482 |  |
| 5                | 6                | 0              | 0.345967                | 1.665872  | -0.347091 |  |
| 6                | 6                | 0              | -0.560726               | 2.659848  | -0.723141 |  |
| 7                | 6                | 0              | -0.079826               | 3.928905  | -0.989792 |  |
| 8                | 6                | 0              | 1.289935                | 4.230184  | -0.906788 |  |
| 9                | 6                | 0              | 2.200639                | 3.241805  | -0.561947 |  |
| 10               | 6                | 0              | 3.741077                | 0.441437  | 0.282643  |  |
| 11               | 6                | 0              | 4.123948                | -0.844420 | 0.640245  |  |
| 12               | 6                | 0              | 3.123763                | -1.822204 | 0.777498  |  |
| 13               | 6                | 0              | 1.780168                | -1.553513 | 0.561312  |  |
| 14               | 6                | 0              | 5.583943                | -1.179377 | 0.886768  |  |
| 15               | 6                | 0              | 5.830837                | -1.622133 | 2.333843  |  |
| 16               | 6                | 0              | 6.100619                | -2.231478 | -0.101743 |  |
| 17               | 8                | 0              | 1.621098                | 5.519650  | -1.194438 |  |
| 18               | 6                | 0              | 2.988485                | 5.880552  | -1.133258 |  |
| 19               | 1                | 0              | -1.619333               | 2.458735  | -0.810388 |  |
| 20               | 1                | 0              | -0.760135               | 4.723069  | -1.278255 |  |
| 21               | 1                | 0              | 3.264074                | 3.439987  | -0.509634 |  |
| 22               | 1                | 0              | 4.490097                | 1.223126  | 0.184990  |  |

|    |   |   |           |           |           |
|----|---|---|-----------|-----------|-----------|
| 23 | 1 | 0 | 3.403654  | -2.830169 | 1.069918  |
| 24 | 1 | 0 | 1.044888  | -2.335117 | 0.692783  |
| 25 | 1 | 0 | 6.156606  | -0.258968 | 0.720096  |
| 26 | 1 | 0 | 6.897113  | -1.803930 | 2.503987  |
| 27 | 1 | 0 | 5.497170  | -0.859207 | 3.043847  |
| 28 | 1 | 0 | 5.295041  | -2.549972 | 2.561239  |
| 29 | 1 | 0 | 7.168139  | -2.416828 | 0.056392  |
| 30 | 1 | 0 | 5.960558  | -1.905102 | -1.136809 |
| 31 | 1 | 0 | 5.575355  | -3.184401 | 0.023945  |
| 32 | 1 | 0 | 3.035009  | 6.938884  | -1.389787 |
| 33 | 1 | 0 | 3.586230  | 5.307218  | -1.850863 |
| 34 | 1 | 0 | 3.396258  | 5.733171  | -0.126791 |
| 35 | 5 | 0 | -1.134936 | -0.400622 | -0.023692 |
| 36 | 6 | 0 | -1.184920 | -1.956272 | -0.311550 |
| 37 | 6 | 0 | -0.736522 | -2.443227 | -1.560842 |
| 38 | 6 | 0 | -1.725862 | -2.880788 | 0.606963  |
| 39 | 6 | 0 | -0.849143 | -3.798748 | -1.863365 |
| 40 | 6 | 0 | -1.801451 | -4.233190 | 0.276529  |
| 41 | 6 | 0 | -1.370698 | -4.715321 | -0.955255 |
| 42 | 1 | 0 | -0.517253 | -4.149169 | -2.838082 |
| 43 | 1 | 0 | -2.215639 | -4.929223 | 1.002276  |
| 44 | 6 | 0 | -2.453395 | 0.410559  | 0.307203  |
| 45 | 6 | 0 | -3.567200 | 0.434709  | -0.558876 |
| 46 | 6 | 0 | -2.557160 | 1.086146  | 1.544855  |
| 47 | 6 | 0 | -4.725797 | 1.117066  | -0.190251 |
| 48 | 6 | 0 | -3.739739 | 1.738851  | 1.887218  |
| 49 | 6 | 0 | -4.835644 | 1.775541  | 1.030305  |
| 50 | 1 | 0 | -5.569688 | 1.128572  | -0.876120 |
| 51 | 1 | 0 | -3.805716 | 2.235162  | 2.852771  |
| 52 | 6 | 0 | -2.190884 | -2.460823 | 1.981236  |
| 53 | 1 | 0 | -1.352894 | -2.117464 | 2.598443  |
| 54 | 1 | 0 | -2.914928 | -1.643886 | 1.936135  |
| 55 | 1 | 0 | -2.656874 | -3.298641 | 2.506140  |
| 56 | 6 | 0 | -0.121911 | -1.539749 | -2.606737 |
| 57 | 1 | 0 | -0.666067 | -0.599622 | -2.726299 |
| 58 | 1 | 0 | 0.910401  | -1.281785 | -2.347993 |
| 59 | 1 | 0 | -0.102489 | -2.037748 | -3.579636 |
| 60 | 6 | 0 | -1.446837 | -6.182380 | -1.287395 |
| 61 | 1 | 0 | -1.602428 | -6.341635 | -2.358153 |
| 62 | 1 | 0 | -0.517533 | -6.696023 | -1.014409 |
| 63 | 1 | 0 | -2.260434 | -6.672580 | -0.745527 |
| 64 | 6 | 0 | -1.415465 | 1.136795  | 2.535733  |
| 65 | 1 | 0 | -0.919227 | 0.170902  | 2.658686  |
| 66 | 1 | 0 | -0.649434 | 1.852478  | 2.219330  |
| 67 | 1 | 0 | -1.774810 | 1.452513  | 3.518637  |
| 68 | 6 | 0 | -3.535080 | -0.222505 | -1.918429 |
| 69 | 1 | 0 | -2.820036 | 0.273224  | -2.584776 |
| 70 | 1 | 0 | -3.244560 | -1.273951 | -1.857631 |
| 71 | 1 | 0 | -4.515370 | -0.168526 | -2.398758 |
| 72 | 6 | 0 | -6.090278 | 2.520555  | 1.403457  |
| 73 | 1 | 0 | -6.031317 | 3.570235  | 1.092562  |
| 74 | 1 | 0 | -6.970480 | 2.087483  | 0.920180  |
| 75 | 1 | 0 | -6.252954 | 2.511667  | 2.484911  |

-----

Step2

Method: cam-b3lyp/6-31+G(d,p) TD(NStates=3) SCRF(solvent=acetonitrile)

Excited State 1: Singlet-A 4.2119 eV 294.37 nm f=0.3827  
 <S\*\*2>=0.000  
 128 ->132 -0.10727  
 130 ->132 -0.16112  
 131 ->132 0.63112  
 131 ->133 0.11895

Step3

Method: cam-b3lyp/6-31+G(d,p)  
 SCRf(Solvent=acetonitrile,NonEquilibrium=Save)  
 SCF Done: E(RCAM-B3LYP) = -1472.67930140 a.u.

Step4

Method: CAM-B3LYP/6-31+G(d,p) TD(NStates=1,Root=1)  
 SCRf(Solvent=acetonitrile,ExternalIteration,NonEquilibrium=Read)

After PCM corrections, the energy is -1472.52455129 a.u.

Excited State 1: Singlet-A 4.2020 eV 295.06 nm f=0.2990  
 <S\*\*2>=0.000  
 128 ->132 -0.12160  
 130 ->132 -0.15788  
 131 ->132 0.63812

Step5

Method: cam-b3lyp/6-31G(d) opt freq(savenormalmodes)  
 TD(NStates=1,Root=1)

Total Energy, E(TD-HF/TD-DFT) = -1472.45693756 a.u.  
 Lowest frequency = 18.2327

Standard orientation:

| Center Number | Atomic Number | Atomic Type | Coordinates (Angstroms) |           |           |
|---------------|---------------|-------------|-------------------------|-----------|-----------|
|               |               |             | X                       | Y         | Z         |
| 1             | 6             | 0           | 1.960925                | 1.605148  | -0.586342 |
| 2             | 6             | 0           | 2.459223                | 0.426050  | 0.116046  |
| 3             | 6             | 0           | 1.324335                | -0.358289 | 0.399942  |
| 4             | 7             | 0           | 0.168192                | 0.258464  | -0.093836 |
| 5             | 6             | 0           | 0.552495                | 1.428396  | -0.682300 |
| 6             | 6             | 0           | -0.258658               | 2.390990  | -1.310295 |
| 7             | 6             | 0           | 0.353049                | 3.506084  | -1.836228 |
| 8             | 6             | 0           | 1.748804                | 3.683721  | -1.741263 |
| 9             | 6             | 0           | 2.566640                | 2.724613  | -1.108186 |
| 10            | 6             | 0           | 3.712757                | -0.002437 | 0.505132  |
| 11            | 6             | 0           | 3.849552                | -1.223721 | 1.188297  |
| 12            | 6             | 0           | 2.706080                | -1.981632 | 1.456545  |
| 13            | 6             | 0           | 1.431149                | -1.570682 | 1.066320  |
| 14            | 6             | 0           | 5.223191                | -1.703390 | 1.618625  |
| 15            | 6             | 0           | 5.326325                | -1.832987 | 3.143281  |
| 16            | 6             | 0           | 5.604921                | -3.018866 | 0.928685  |
| 17            | 8             | 0           | 2.217457                | 4.814613  | -2.284870 |
| 18            | 6             | 0           | 3.614659                | 5.088739  | -2.234268 |
| 19            | 1             | 0           | -1.331082               | 2.254919  | -1.364499 |
| 20            | 1             | 0           | -0.221927               | 4.280522  | -2.330083 |
| 21            | 1             | 0           | 3.637388                | 2.863287  | -1.034242 |



|    |   |   |           |           |           |
|----|---|---|-----------|-----------|-----------|
| 22 | 1 | 0 | 4.595223  | 0.592955  | 0.288887  |
| 23 | 1 | 0 | 2.805907  | -2.925773 | 1.982623  |
| 24 | 1 | 0 | 0.555405  | -2.175630 | 1.267304  |
| 25 | 1 | 0 | 5.944249  | -0.941163 | 1.301205  |
| 26 | 1 | 0 | 6.341570  | -2.122185 | 3.432751  |
| 27 | 1 | 0 | 5.085878  | -0.887916 | 3.639349  |
| 28 | 1 | 0 | 4.640873  | -2.597519 | 3.523841  |
| 29 | 1 | 0 | 6.621038  | -3.314649 | 1.208328  |
| 30 | 1 | 0 | 5.564757  | -2.922290 | -0.160404 |
| 31 | 1 | 0 | 4.929252  | -3.829787 | 1.220379  |
| 32 | 1 | 0 | 3.744506  | 6.047786  | -2.732649 |
| 33 | 1 | 0 | 4.183558  | 4.319524  | -2.764076 |
| 34 | 1 | 0 | 3.961041  | 5.162600  | -1.199543 |
| 35 | 5 | 0 | -1.262877 | -0.283735 | -0.016858 |
| 36 | 6 | 0 | -1.507249 | -1.684944 | -0.669166 |
| 37 | 6 | 0 | -0.925887 | -2.083014 | -1.905709 |
| 38 | 6 | 0 | -2.314798 | -2.656863 | -0.005846 |
| 39 | 6 | 0 | -1.136498 | -3.361412 | -2.419090 |
| 40 | 6 | 0 | -2.500904 | -3.921593 | -0.555916 |
| 41 | 6 | 0 | -1.918673 | -4.305863 | -1.763064 |
| 42 | 1 | 0 | -0.685359 | -3.622382 | -3.374759 |
| 43 | 1 | 0 | -3.111996 | -4.641683 | -0.014531 |
| 44 | 6 | 0 | -2.297623 | 0.631466  | 0.712756  |
| 45 | 6 | 0 | -3.606305 | 0.817906  | 0.172269  |
| 46 | 6 | 0 | -1.992061 | 1.361003  | 1.897019  |
| 47 | 6 | 0 | -4.507813 | 1.686963  | 0.778132  |
| 48 | 6 | 0 | -2.925453 | 2.223118  | 2.469129  |
| 49 | 6 | 0 | -4.192899 | 2.410974  | 1.927986  |
| 50 | 1 | 0 | -5.490487 | 1.816996  | 0.328078  |
| 51 | 1 | 0 | -2.658026 | 2.753168  | 3.381545  |
| 52 | 6 | 0 | -2.954005 | -2.384115 | 1.334863  |
| 53 | 1 | 0 | -2.230869 | -1.955785 | 2.037357  |
| 54 | 1 | 0 | -3.777201 | -1.665951 | 1.268304  |
| 55 | 1 | 0 | -3.350325 | -3.307799 | 1.766890  |
| 56 | 6 | 0 | -0.110638 | -1.126673 | -2.738453 |
| 57 | 1 | 0 | -0.605567 | -0.152620 | -2.825073 |
| 58 | 1 | 0 | 0.881219  | -0.941463 | -2.310875 |
| 59 | 1 | 0 | 0.041577  | -1.521432 | -3.747084 |
| 60 | 6 | 0 | -2.112394 | -5.692650 | -2.318505 |
| 61 | 1 | 0 | -1.913355 | -5.722503 | -3.393863 |
| 62 | 1 | 0 | -1.437255 | -6.415137 | -1.843148 |
| 63 | 1 | 0 | -3.132741 | -6.052912 | -2.152743 |
| 64 | 6 | 0 | -0.678662 | 1.182436  | 2.615857  |
| 65 | 1 | 0 | -0.415586 | 0.122538  | 2.705624  |
| 66 | 1 | 0 | 0.154284  | 1.671249  | 2.098217  |
| 67 | 1 | 0 | -0.725684 | 1.607150  | 3.622791  |
| 68 | 6 | 0 | -4.047344 | 0.135310  | -1.100003 |
| 69 | 1 | 0 | -3.296436 | 0.250559  | -1.889515 |
| 70 | 1 | 0 | -4.189133 | -0.942062 | -0.969666 |
| 71 | 1 | 0 | -4.992037 | 0.556869  | -1.455890 |
| 72 | 6 | 0 | -5.179592 | 3.368301  | 2.543387  |
| 73 | 1 | 0 | -5.195033 | 4.328162  | 2.012084  |
| 74 | 1 | 0 | -6.199034 | 2.970436  | 2.511823  |
| 75 | 1 | 0 | -4.931089 | 3.579911  | 3.587565  |

-----

Step6

Method: cam-b3lyp/6-31+G(d,p) TD(NStates=1, Root=1)  
 SCRF(Solvent=acetonitrile,ExternalIteration,NonEquilibrium=Save)

After PCM corrections, the energy is -1472.57319406 a.u.

Excited State 1: Singlet-A 2.5096 eV 494.05 nm f=0.0504  
<S\*\*2>=0.000  
123 ->132 0.10339  
131 ->132 -0.68065

Step7

Method: cam-b3lyp/6-31+G(d,p) SCRF(Solvent=acetonitrile,  
NonEquilibrium=Read)

SCF Done: E(RCAM-B3LYP) = -1472.65438144 a.u.

#### Results

| Property        | Value      | Value    | Value      |
|-----------------|------------|----------|------------|
| Absorb Energy   | 0.155 a.u. | 4.211 eV | 294.432 nm |
| Emission Energy | 0.081 a.u. | 2.209 eV | 561.212 nm |
| Stokes Shift    | 0.074 a.u. | 2.002 eV | 266.780 nm |

Compound 4 n-hexane

Step1

Method: cam-b3lyp/6-31G(d)  
Solvent : n-Hexane  
SCF Done: E(RCAM-B3LYP) = -1695.06807929 a.u.  
Lowest frequency = 15.5059

#### Standard orientation:

| Center Number | Atomic Number | Atomic Type | Coordinates (Angstroms) |           |           |
|---------------|---------------|-------------|-------------------------|-----------|-----------|
|               |               |             | X                       | Y         | Z         |
| 1             | 6             | 0           | -2.231344               | 0.568713  | -0.120318 |
| 2             | 6             | 0           | -1.526621               | 1.796244  | 0.181088  |
| 3             | 6             | 0           | -0.163739               | 1.476720  | 0.245470  |
| 4             | 7             | 0           | 0.023641                | 0.087654  | 0.010571  |
| 5             | 6             | 0           | -1.265502               | -0.449756 | -0.209064 |
| 6             | 6             | 0           | -1.642399               | -1.749906 | -0.549191 |
| 7             | 6             | 0           | -2.986439               | -2.013142 | -0.755608 |
| 8             | 6             | 0           | -3.949544               | -1.004084 | -0.643864 |
| 9             | 6             | 0           | -3.577633               | 0.294025  | -0.332663 |
| 10            | 6             | 0           | -1.968852               | 3.097568  | 0.411711  |
| 11            | 6             | 0           | -1.055002               | 4.095816  | 0.718613  |
| 12            | 6             | 0           | 0.304774                | 3.751238  | 0.799101  |
| 13            | 6             | 0           | 0.765397                | 2.462652  | 0.576610  |
| 14            | 6             | 0           | -1.516285               | 5.519731  | 0.970634  |
| 15            | 6             | 0           | -1.202027               | 5.975638  | 2.400342  |
| 16            | 6             | 0           | -0.931988               | 6.496565  | -0.056514 |
| 17            | 1             | 0           | -0.914034               | -2.541406 | -0.654233 |
| 18            | 1             | 0           | -3.296902               | -3.017622 | -1.021533 |
| 19            | 1             | 0           | -4.322992               | 1.078842  | -0.268294 |
| 20            | 1             | 0           | -3.029247               | 3.329948  | 0.357559  |
| 21            | 1             | 0           | 1.031629                | 4.518295  | 1.050090  |
| 22            | 1             | 0           | 1.820670                | 2.242302  | 0.659228  |

|    |   |   |           |           |           |
|----|---|---|-----------|-----------|-----------|
| 23 | 1 | 0 | -2.606884 | 5.529081  | 0.852825  |
| 24 | 1 | 0 | -1.593795 | 6.982391  | 2.579162  |
| 25 | 1 | 0 | -1.645337 | 5.300116  | 3.137970  |
| 26 | 1 | 0 | -0.121798 | 6.003409  | 2.579032  |
| 27 | 1 | 0 | -1.320891 | 7.506999  | 0.107173  |
| 28 | 1 | 0 | -1.182972 | 6.194756  | -1.077733 |
| 29 | 1 | 0 | 0.159618  | 6.544565  | 0.019102  |
| 30 | 5 | 0 | 1.278814  | -0.630882 | -0.000603 |
| 31 | 6 | 0 | 2.604940  | 0.131413  | -0.391706 |
| 32 | 6 | 0 | 2.700862  | 0.766757  | -1.649658 |
| 33 | 6 | 0 | 3.739423  | 0.139974  | 0.448916  |
| 34 | 6 | 0 | 3.895945  | 1.370758  | -2.035531 |
| 35 | 6 | 0 | 4.907474  | 0.777031  | 0.037745  |
| 36 | 6 | 0 | 5.009561  | 1.397489  | -1.203712 |
| 37 | 1 | 0 | 3.956088  | 1.837381  | -3.016067 |
| 38 | 1 | 0 | 5.766632  | 0.781777  | 0.704515  |
| 39 | 6 | 0 | 1.298487  | -2.163320 | 0.379889  |
| 40 | 6 | 0 | 1.853339  | -3.140122 | -0.475539 |
| 41 | 6 | 0 | 0.815616  | -2.576757 | 1.641390  |
| 42 | 6 | 0 | 1.898128  | -4.473324 | -0.075563 |
| 43 | 6 | 0 | 0.902225  | -3.916289 | 2.015450  |
| 44 | 6 | 0 | 1.429751  | -4.884606 | 1.168638  |
| 45 | 1 | 0 | 2.319338  | -5.212009 | -0.753530 |
| 46 | 1 | 0 | 0.542927  | -4.211417 | 2.998637  |
| 47 | 6 | 0 | 3.724450  | -0.501559 | 1.816732  |
| 48 | 1 | 0 | 2.937589  | -0.083529 | 2.453619  |
| 49 | 1 | 0 | 3.551571  | -1.579235 | 1.757593  |
| 50 | 1 | 0 | 4.676380  | -0.340123 | 2.329102  |
| 51 | 6 | 0 | 1.542142  | 0.826691  | -2.619878 |
| 52 | 1 | 0 | 0.989474  | -0.114095 | -2.681546 |
| 53 | 1 | 0 | 0.824435  | 1.601400  | -2.330245 |
| 54 | 1 | 0 | 1.897128  | 1.067718  | -3.625311 |
| 55 | 6 | 0 | 6.278571  | 2.092053  | -1.621906 |
| 56 | 1 | 0 | 6.368777  | 2.137348  | -2.710706 |
| 57 | 1 | 0 | 6.304652  | 3.122546  | -1.248579 |
| 58 | 1 | 0 | 7.162000  | 1.581980  | -1.227055 |
| 59 | 6 | 0 | 0.192839  | -1.614903 | 2.628831  |
| 60 | 1 | 0 | 0.711841  | -0.654442 | 2.673708  |
| 61 | 1 | 0 | -0.850221 | -1.403129 | 2.370625  |
| 62 | 1 | 0 | 0.199823  | -2.042257 | 3.634990  |
| 63 | 6 | 0 | 2.382891  | -2.791830 | -1.846988 |
| 64 | 1 | 0 | 1.616756  | -2.319650 | -2.471191 |
| 65 | 1 | 0 | 3.225340  | -2.097558 | -1.792042 |
| 66 | 1 | 0 | 2.719291  | -3.690366 | -2.370582 |
| 67 | 6 | 0 | 1.474705  | -6.333967 | 1.574656  |
| 68 | 1 | 0 | 0.579641  | -6.866328 | 1.232040  |
| 69 | 1 | 0 | 2.340596  | -6.843372 | 1.142125  |
| 70 | 1 | 0 | 1.522213  | -6.442863 | 2.661689  |
| 71 | 6 | 0 | -5.393467 | -1.351506 | -0.823158 |
| 72 | 9 | 0 | -5.925731 | -1.890883 | 0.292006  |
| 73 | 9 | 0 | -5.573535 | -2.255067 | -1.804806 |
| 74 | 9 | 0 | -6.141063 | -0.275455 | -1.126407 |

-----

Step2

Method: cam-b3lyp/6-31+G(d,p) TD(NStates=3) SCRF(solvent=n-hexane)

Excited State 1: Singlet-A 4.2399 eV 292.43 nm f=0.2926  
<S\*\*2>=0.000

```

135 ->140      0.10564
138 ->140      0.15373
139 ->140      0.64708

```

Step3

Method: cam-b3lyp/6-31+G(d,p) SCRF(Solvent=n-hexane,NonEquilibrium=Save)  
SCF Done: E(RCAM-B3LYP) = -1695.17723825 a.u.

Step4

Method: CAM-B3LYP/6-31+G(d,p) TD(NStates=1,Root=1)  
SCRF(Solvent=n-hexane,ExternalIteration,NonEquilibrium=Read)

After PCM corrections, the energy is -1695.02133983 a.u.

```

Excited State  1:      Singlet-A          4.2437 eV  292.16 nm  f=0.2332
<S**2>=0.000
  135 ->140      0.10767
  138 ->140      0.16668
  139 ->140      0.64270

```

Step5

Method: cam-b3lyp/6-31G(d) opt freq(savenormalmodes)  
TD(NStates=1,Root=1)

Total Energy, E(TD-HF/TD-DFT) = -1694.93295102 a.u.  
Lowest frequency = 14.9584

Standard orientation:

| Center<br>Number | Atomic<br>Number | Atomic<br>Type | Coordinates (Angstroms) |           |           |
|------------------|------------------|----------------|-------------------------|-----------|-----------|
|                  |                  |                | X                       | Y         | Z         |
| 1                | 6                | 0              | -2.277011               | 0.299862  | -0.200768 |
| 2                | 6                | 0              | -1.739563               | 1.540600  | 0.350413  |
| 3                | 6                | 0              | -0.338302               | 1.335405  | 0.457035  |
| 4                | 7                | 0              | 0.009032                | 0.090109  | 0.010551  |
| 5                | 6                | 0              | -1.162203               | -0.547400 | -0.395541 |
| 6                | 6                | 0              | -1.293109               | -1.832973 | -0.901929 |
| 7                | 6                | 0              | -2.578168               | -2.263333 | -1.236145 |
| 8                | 6                | 0              | -3.677963               | -1.433760 | -1.053155 |
| 9                | 6                | 0              | -3.539009               | -0.137573 | -0.530583 |
| 10               | 6                | 0              | -2.288765               | 2.738655  | 0.740843  |
| 11               | 6                | 0              | -1.454419               | 3.757652  | 1.246304  |
| 12               | 6                | 0              | -0.072727               | 3.535229  | 1.338276  |
| 13               | 6                | 0              | 0.509245                | 2.339957  | 0.946258  |
| 14               | 6                | 0              | -2.055607               | 5.079012  | 1.676522  |
| 15               | 6                | 0              | -1.830155               | 5.338563  | 3.171970  |
| 16               | 6                | 0              | -1.524243               | 6.242527  | 0.828836  |
| 17               | 1                | 0              | -0.430577               | -2.476197 | -1.017656 |
| 18               | 1                | 0              | -2.722248               | -3.257007 | -1.642885 |
| 19               | 1                | 0              | -4.411978               | 0.492667  | -0.400337 |
| 20               | 1                | 0              | -3.357830               | 2.913920  | 0.664931  |
| 21               | 1                | 0              | 0.565609                | 4.324998  | 1.719688  |
| 22               | 1                | 0              | 1.578395                | 2.181008  | 0.993734  |
| 23               | 1                | 0              | -3.137000               | 5.012720  | 1.509710  |
| 24               | 1                | 0              | -2.324042               | 6.267728  | 3.472273  |
| 25               | 1                | 0              | -2.231677               | 4.525114  | 3.783069  |

|    |   |   |           |           |           |
|----|---|---|-----------|-----------|-----------|
| 26 | 1 | 0 | -0.764543 | 5.438130  | 3.401829  |
| 27 | 1 | 0 | -2.017849 | 7.175528  | 1.117482  |
| 28 | 1 | 0 | -1.705567 | 6.075285  | -0.236751 |
| 29 | 1 | 0 | -0.447164 | 6.377709  | 0.969896  |
| 30 | 5 | 0 | 1.431808  | -0.501064 | -0.013462 |
| 31 | 6 | 0 | 2.481394  | 0.306448  | -0.837679 |
| 32 | 6 | 0 | 2.188053  | 0.914096  | -2.090959 |
| 33 | 6 | 0 | 3.795279  | 0.514393  | -0.318238 |
| 34 | 6 | 0 | 3.136968  | 1.693614  | -2.747197 |
| 35 | 6 | 0 | 4.711159  | 1.298282  | -1.010257 |
| 36 | 6 | 0 | 4.408079  | 1.907422  | -2.227328 |
| 37 | 1 | 0 | 2.880101  | 2.131708  | -3.709773 |
| 38 | 1 | 0 | 5.698137  | 1.451205  | -0.577594 |
| 39 | 6 | 0 | 1.635032  | -1.830605 | 0.779164  |
| 40 | 6 | 0 | 2.417588  | -2.884494 | 0.217734  |
| 41 | 6 | 0 | 1.039256  | -2.085997 | 2.045852  |
| 42 | 6 | 0 | 2.559306  | -4.093491 | 0.889809  |
| 43 | 6 | 0 | 1.206613  | -3.313718 | 2.681034  |
| 44 | 6 | 0 | 1.960362  | -4.339805 | 2.123941  |
| 45 | 1 | 0 | 3.150124  | -4.881218 | 0.426041  |
| 46 | 1 | 0 | 0.745871  | -3.466374 | 3.655114  |
| 47 | 6 | 0 | 4.227126  | -0.048613 | 1.014019  |
| 48 | 1 | 0 | 3.484949  | 0.158696  | 1.792544  |
| 49 | 1 | 0 | 4.345272  | -1.136155 | 0.992158  |
| 50 | 1 | 0 | 5.182603  | 0.385301  | 1.322867  |
| 51 | 6 | 0 | 0.872300  | 0.683147  | -2.789299 |
| 52 | 1 | 0 | 0.595708  | -0.377313 | -2.777116 |
| 53 | 1 | 0 | 0.045296  | 1.232971  | -2.325734 |
| 54 | 1 | 0 | 0.924334  | 1.005172  | -3.833149 |
| 55 | 6 | 0 | 5.415869  | 2.771340  | -2.938076 |
| 56 | 1 | 0 | 5.139495  | 2.926186  | -3.985072 |
| 57 | 1 | 0 | 5.497938  | 3.761076  | -2.471872 |
| 58 | 1 | 0 | 6.415019  | 2.324080  | -2.915912 |
| 59 | 6 | 0 | 0.258245  | -1.025642 | 2.778869  |
| 60 | 1 | 0 | 0.784273  | -0.064113 | 2.769233  |
| 61 | 1 | 0 | -0.731147 | -0.853579 | 2.339493  |
| 62 | 1 | 0 | 0.098567  | -1.312266 | 3.822086  |
| 63 | 6 | 0 | 3.073536  | -2.763622 | -1.136764 |
| 64 | 1 | 0 | 2.371350  | -2.385917 | -1.887581 |
| 65 | 1 | 0 | 3.917454  | -2.067265 | -1.135106 |
| 66 | 1 | 0 | 3.444573  | -3.736867 | -1.471020 |
| 67 | 6 | 0 | 2.111427  | -5.670601 | 2.812066  |
| 68 | 1 | 0 | 1.456924  | -6.430300 | 2.367072  |
| 69 | 1 | 0 | 3.136492  | -6.047698 | 2.736461  |
| 70 | 1 | 0 | 1.855310  | -5.601440 | 3.873310  |
| 71 | 6 | 0 | -5.056573 | -1.937970 | -1.360218 |
| 72 | 9 | 0 | -5.680951 | -2.379519 | -0.252768 |
| 73 | 9 | 0 | -5.040191 | -2.954469 | -2.235542 |
| 74 | 9 | 0 | -5.830919 | -0.967409 | -1.878005 |

-----

Step6

Method: cam-b3lyp/6-31+G(d,p) TD(NStates=1, Root=1)  
 SCRF(Solvent=n-hexane,ExternalIteration,NonEquilibrium=Save)  
 After PCM corrections, the energy is -1695.04858119 a.u.

Excited State 1: Singlet-A 3.0663 eV 404.35 nm f=0.0452  
 <S\*\*2>=0.000  
 131 ->140 0.10821

139 ->140

0.67911

Step7

Method: cam-b3lyp/6-31+G(d,p) SCRF(Solvent=n-hexane,  
NonEquilibrium=Read)

SCF Done: E(RCAM-B3LYP) = -1695.16012992 a.u.

Results

| -----           |   |            |          |            |
|-----------------|---|------------|----------|------------|
|                 |   |            |          |            |
| Absorb Energy   | = | 0.156 a.u. | 4.242 eV | 292.263 nm |
| Emission Energy | = | 0.112 a.u. | 3.035 eV | 408.461 nm |
| Stokes Shift    | = | 0.044 a.u. | 1.207 eV | 116.198 nm |
| -----           |   |            |          |            |

Compound 4 THF

Step1

Method: cam-b3lyp/6-31G(d)

Solvent : TetraHydroFuran

SCF Done: E(RCAM-B3LYP) = -1695.07115732 a.u.

Lowest frequency = 15.9229

Standard orientation:

| -----            |                  |                |                         |           |           |  |
|------------------|------------------|----------------|-------------------------|-----------|-----------|--|
| Center<br>Number | Atomic<br>Number | Atomic<br>Type | Coordinates (Angstroms) |           |           |  |
|                  |                  |                | X                       | Y         | Z         |  |
| 1                | 6                | 0              | -2.223930               | 0.589656  | -0.121577 |  |
| 2                | 6                | 0              | -1.507635               | 1.810468  | 0.180599  |  |
| 3                | 6                | 0              | -0.147859               | 1.477163  | 0.245834  |  |
| 4                | 7                | 0              | 0.026002                | 0.086661  | 0.010617  |  |
| 5                | 6                | 0              | -1.267245               | -0.438038 | -0.210245 |  |
| 6                | 6                | 0              | -1.656067               | -1.734443 | -0.552035 |  |
| 7                | 6                | 0              | -3.002389               | -1.985507 | -0.759308 |  |
| 8                | 6                | 0              | -3.955991               | -0.966983 | -0.646999 |  |
| 9                | 6                | 0              | -3.572850               | 0.328032  | -0.334689 |  |
| 10               | 6                | 0              | -1.937813               | 3.116290  | 0.411336  |  |
| 11               | 6                | 0              | -1.014009               | 4.105374  | 0.719515  |  |
| 12               | 6                | 0              | 0.342664                | 3.747210  | 0.801475  |  |
| 13               | 6                | 0              | 0.790630                | 2.453936  | 0.578721  |  |
| 14               | 6                | 0              | -1.461545               | 5.533712  | 0.972027  |  |
| 15               | 6                | 0              | -1.146978               | 5.984166  | 2.403463  |  |
| 16               | 6                | 0              | -0.862895               | 6.506038  | -0.051192 |  |
| 17               | 1                | 0              | -0.935063               | -2.532192 | -0.659796 |  |
| 18               | 1                | 0              | -3.320645               | -2.987300 | -1.026145 |  |
| 19               | 1                | 0              | -4.310100               | 1.120410  | -0.269504 |  |
| 20               | 1                | 0              | -2.995748               | 3.359009  | 0.356400  |  |
| 21               | 1                | 0              | 1.076974                | 4.506543  | 1.054138  |  |
| 22               | 1                | 0              | 1.843371                | 2.222976  | 0.664125  |  |
| 23               | 1                | 0              | -2.551353               | 5.554453  | 0.850424  |  |
| 24               | 1                | 0              | -1.528674               | 6.994893  | 2.581303  |  |
| 25               | 1                | 0              | -1.601263               | 5.313223  | 3.138801  |  |
| 26               | 1                | 0              | -0.067080               | 6.000040  | 2.585662  |  |
| 27               | 1                | 0              | -1.242343               | 7.519801  | 0.113673  |  |
| 28               | 1                | 0              | -1.114139               | 6.209386  | -1.074006 |  |

|    |   |   |           |           |           |
|----|---|---|-----------|-----------|-----------|
| 29 | 1 | 0 | 0.228850  | 6.542579  | 0.028962  |
| 30 | 5 | 0 | 1.275050  | -0.644260 | 0.000424  |
| 31 | 6 | 0 | 2.607130  | 0.106051  | -0.394254 |
| 32 | 6 | 0 | 2.707572  | 0.729782  | -1.657922 |
| 33 | 6 | 0 | 3.740796  | 0.116717  | 0.447611  |
| 34 | 6 | 0 | 3.906904  | 1.322501  | -2.049148 |
| 35 | 6 | 0 | 4.913892  | 0.741442  | 0.030636  |
| 36 | 6 | 0 | 5.020896  | 1.349256  | -1.217029 |
| 37 | 1 | 0 | 3.970612  | 1.779356  | -3.034016 |
| 38 | 1 | 0 | 5.772564  | 0.747281  | 0.697967  |
| 39 | 6 | 0 | 1.278612  | -2.176198 | 0.384645  |
| 40 | 6 | 0 | 1.815933  | -3.163396 | -0.470236 |
| 41 | 6 | 0 | 0.795651  | -2.579224 | 1.649811  |
| 42 | 6 | 0 | 1.844379  | -4.496198 | -0.066051 |
| 43 | 6 | 0 | 0.864920  | -3.918919 | 2.027909  |
| 44 | 6 | 0 | 1.375317  | -4.897406 | 1.181528  |
| 45 | 1 | 0 | 2.252550  | -5.242661 | -0.743419 |
| 46 | 1 | 0 | 0.506489  | -4.205902 | 3.013789  |
| 47 | 6 | 0 | 3.717694  | -0.503081 | 1.825229  |
| 48 | 1 | 0 | 2.959047  | -0.038924 | 2.464782  |
| 49 | 1 | 0 | 3.495630  | -1.572493 | 1.786467  |
| 50 | 1 | 0 | 4.682785  | -0.376099 | 2.322232  |
| 51 | 6 | 0 | 1.549223  | 0.787913  | -2.628917 |
| 52 | 1 | 0 | 0.998354  | -0.153945 | -2.690614 |
| 53 | 1 | 0 | 0.829994  | 1.561497  | -2.339823 |
| 54 | 1 | 0 | 1.904370  | 1.029604  | -3.634034 |
| 55 | 6 | 0 | 6.295099  | 2.030496  | -1.641544 |
| 56 | 1 | 0 | 6.383852  | 2.067943  | -2.730693 |
| 57 | 1 | 0 | 6.329546  | 3.063129  | -1.274969 |
| 58 | 1 | 0 | 7.174512  | 1.516295  | -1.243256 |
| 59 | 6 | 0 | 0.193479  | -1.604475 | 2.637540  |
| 60 | 1 | 0 | 0.739012  | -0.659038 | 2.688041  |
| 61 | 1 | 0 | -0.842221 | -1.363463 | 2.375326  |
| 62 | 1 | 0 | 0.184106  | -2.035309 | 3.642088  |
| 63 | 6 | 0 | 2.341126  | -2.827638 | -1.846412 |
| 64 | 1 | 0 | 1.569407  | -2.369900 | -2.474489 |
| 65 | 1 | 0 | 3.177305  | -2.125211 | -1.801085 |
| 66 | 1 | 0 | 2.684545  | -3.729516 | -2.359405 |
| 67 | 6 | 0 | 1.402284  | -6.346051 | 1.591898  |
| 68 | 1 | 0 | 0.500828  | -6.867888 | 1.249910  |
| 69 | 1 | 0 | 2.261613  | -6.867252 | 1.160474  |
| 70 | 1 | 0 | 1.447252  | -6.452043 | 2.679256  |
| 71 | 6 | 0 | -5.402307 | -1.300290 | -0.827175 |
| 72 | 9 | 0 | -5.943780 | -1.831072 | 0.289162  |
| 73 | 9 | 0 | -5.592242 | -2.206027 | -1.805717 |
| 74 | 9 | 0 | -6.140682 | -0.218983 | -1.135141 |

-----

Step2

Method: cam-b3lyp/6-31+G(d,p) TD(NStates=3) SCRF(solvent=THF)

Excited State 1: Singlet-A 4.2488 eV 291.81 nm f=0.2935  
 <S\*\*2>=0.000  
 135 ->140 0.10153  
 138 ->140 0.14832  
 139 ->140 0.64799

Step3

Method: cam-b3lyp/6-31+G(d,p) SCRF(Solvent=THF,NonEquilibrium=Save)  
 SCF Done: E(RCAM-B3LYP) = -1695.18089053 a.u.

Step4

Method: CAM-B3LYP/6-31+G(d,p) TD(NStates=1,Root=1)  
 SCRF(Solvent=THF,ExternalIteration,NonEquilibrium=Read)

After PCM corrections, the energy is -1695.02419206 a.u.

Excited State 1: Singlet-A 4.2543 eV 291.43 nm f=0.2311  
 <S\*\*2>=0.000  
 135 ->140 0.10561  
 138 ->140 0.16006  
 139 ->140 0.64372

Step5

Method: cam-b3lyp/6-31G(d) opt freq(savenormalmodes)  
 TD(NStates=1,Root=1)

Total Energy, E(TD-HF/TD-DFT) = -1694.93493514 a.u.  
 Lowest frequency = 15.5407

Standard orientation:

| Center Number | Atomic Number | Atomic Type | Coordinates (Angstroms) |           |           |
|---------------|---------------|-------------|-------------------------|-----------|-----------|
|               |               |             | X                       | Y         | Z         |
| 1             | 6             | 0           | -2.272357               | 0.319813  | -0.199539 |
| 2             | 6             | 0           | -1.723725               | 1.559488  | 0.344026  |
| 3             | 6             | 0           | -0.325505               | 1.344245  | 0.452945  |
| 4             | 7             | 0           | 0.013006                | 0.090866  | 0.010351  |
| 5             | 6             | 0           | -1.166076               | -0.538153 | -0.393206 |
| 6             | 6             | 0           | -1.307537               | -1.820905 | -0.903739 |
| 7             | 6             | 0           | -2.596542               | -2.241571 | -1.234594 |
| 8             | 6             | 0           | -3.689012               | -1.402730 | -1.047145 |
| 9             | 6             | 0           | -3.538935               | -0.106849 | -0.526647 |
| 10            | 6             | 0           | -2.264932               | 2.763563  | 0.728186  |
| 11            | 6             | 0           | -1.423205               | 3.777470  | 1.231593  |
| 12            | 6             | 0           | -0.044208               | 3.542893  | 1.331315  |
| 13            | 6             | 0           | 0.528212                | 2.339826  | 0.946565  |
| 14            | 6             | 0           | -2.014989               | 5.104953  | 1.655890  |
| 15            | 6             | 0           | -1.795533               | 5.364250  | 3.152304  |
| 16            | 6             | 0           | -1.467320               | 6.261986  | 0.809810  |
| 17            | 1             | 0           | -0.450214               | -2.469127 | -1.030848 |
| 18            | 1             | 0           | -2.747877               | -3.233219 | -1.643535 |
| 19            | 1             | 0           | -4.404639               | 0.532955  | -0.395781 |
| 20            | 1             | 0           | -3.332344               | 2.945875  | 0.649761  |
| 21            | 1             | 0           | 0.599766                | 4.326214  | 1.716449  |
| 22            | 1             | 0           | 1.594938                | 2.169452  | 1.009939  |
| 23            | 1             | 0           | -3.095519               | 5.048077  | 1.482666  |
| 24            | 1             | 0           | -2.282716               | 6.298580  | 3.447481  |
| 25            | 1             | 0           | -2.209599               | 4.555500  | 3.761407  |
| 26            | 1             | 0           | -0.730269               | 5.453933  | 3.388078  |
| 27            | 1             | 0           | -1.954706               | 7.199385  | 1.094748  |
| 28            | 1             | 0           | -1.645031               | 6.094576  | -0.256453 |
| 29            | 1             | 0           | -0.389889               | 6.387468  | 0.957539  |
| 30            | 5             | 0           | 1.420456                | -0.508907 | -0.011770 |
| 31            | 6             | 0           | 2.489638                | 0.289402  | -0.825153 |



|    |   |   |           |           |           |
|----|---|---|-----------|-----------|-----------|
| 32 | 6 | 0 | 2.209301  | 0.900490  | -2.080684 |
| 33 | 6 | 0 | 3.803313  | 0.479430  | -0.300429 |
| 34 | 6 | 0 | 3.169171  | 1.673286  | -2.729562 |
| 35 | 6 | 0 | 4.731492  | 1.256384  | -0.985325 |
| 36 | 6 | 0 | 4.440148  | 1.873723  | -2.201565 |
| 37 | 1 | 0 | 2.921565  | 2.116923  | -3.692068 |
| 38 | 1 | 0 | 5.717828  | 1.398038  | -0.547483 |
| 39 | 6 | 0 | 1.612993  | -1.850561 | 0.771100  |
| 40 | 6 | 0 | 2.377876  | -2.911606 | 0.202449  |
| 41 | 6 | 0 | 1.022453  | -2.099967 | 2.041664  |
| 42 | 6 | 0 | 2.507262  | -4.125950 | 0.869520  |
| 43 | 6 | 0 | 1.175881  | -3.332473 | 2.672108  |
| 44 | 6 | 0 | 1.911559  | -4.368125 | 2.106231  |
| 45 | 1 | 0 | 3.084249  | -4.920341 | 0.399790  |
| 46 | 1 | 0 | 0.718792  | -3.481759 | 3.648516  |
| 47 | 6 | 0 | 4.221614  | -0.094019 | 1.031443  |
| 48 | 1 | 0 | 3.475961  | 0.119455  | 1.805074  |
| 49 | 1 | 0 | 4.328090  | -1.182811 | 1.003384  |
| 50 | 1 | 0 | 5.179747  | 0.327911  | 1.348408  |
| 51 | 6 | 0 | 0.894868  | 0.682142  | -2.784991 |
| 52 | 1 | 0 | 0.613590  | -0.377204 | -2.782667 |
| 53 | 1 | 0 | 0.069745  | 1.230020  | -2.315902 |
| 54 | 1 | 0 | 0.950318  | 1.015446  | -3.825111 |
| 55 | 6 | 0 | 5.456882  | 2.735074  | -2.902927 |
| 56 | 1 | 0 | 5.244590  | 2.811203  | -3.973425 |
| 57 | 1 | 0 | 5.464974  | 3.755688  | -2.500211 |
| 58 | 1 | 0 | 6.469589  | 2.336831  | -2.785399 |
| 59 | 6 | 0 | 0.259642  | -1.029702 | 2.779228  |
| 60 | 1 | 0 | 0.798630  | -0.075462 | 2.767317  |
| 61 | 1 | 0 | -0.727704 | -0.842751 | 2.341270  |
| 62 | 1 | 0 | 0.098181  | -1.315474 | 3.822405  |
| 63 | 6 | 0 | 3.027608  | -2.792344 | -1.155028 |
| 64 | 1 | 0 | 2.323837  | -2.402197 | -1.898218 |
| 65 | 1 | 0 | 3.880078  | -2.106196 | -1.152676 |
| 66 | 1 | 0 | 3.384793  | -3.768026 | -1.497118 |
| 67 | 6 | 0 | 2.042583  | -5.704296 | 2.788658  |
| 68 | 1 | 0 | 1.292547  | -6.417007 | 2.423618  |
| 69 | 1 | 0 | 3.024725  | -6.152184 | 2.608162  |
| 70 | 1 | 0 | 1.904197  | -5.615059 | 3.870247  |
| 71 | 6 | 0 | -5.071134 | -1.897059 | -1.350987 |
| 72 | 9 | 0 | -5.695245 | -2.342985 | -0.243674 |
| 73 | 9 | 0 | -5.065933 | -2.909930 | -2.231807 |
| 74 | 9 | 0 | -5.844648 | -0.921407 | -1.860522 |

-----

Step6

Method: cam-b3lyp/6-31+G(d,p) TD(NStates=1, Root=1)  
 SCRF(Solvent=THF, ExternalIteration, NonEquilibrium=Save)  
 After PCM corrections, the energy is -1695.05948001 a.u.

Excited State 1: Singlet-A 2.9664 eV 417.97 nm f=0.0496  
 <S\*\*2>=0.000  
 131 ->140 0.10408  
 139 ->140 0.67851

Step7

Method: cam-b3lyp/6-31+G(d,p) SCRF(Solvent=THF, NonEquilibrium=Read)

SCF Done: E(RCAM-B3LYP) = -1695.16216726 a.u.

Results

|                 |   |            |          |            |
|-----------------|---|------------|----------|------------|
| Absorb Energy   | = | 0.157 a.u. | 4.264 eV | 290.771 nm |
| Emission Energy | = | 0.103 a.u. | 2.794 eV | 443.710 nm |
| Stokes Shift    | = | 0.054 a.u. | 1.470 eV | 152.939 nm |

Compound 4 ACN

Step1

Method: cam-b3lyp/6-31G(d)

Solvent : Acetonitrile

SCF Done: E(RCAM-B3LYP) = -1695.07240266 a.u.

Lowest frequency = 16.4569

Standard orientation:

| Center Number | Atomic Number | Atomic Type | Coordinates (Angstroms) |           |           |
|---------------|---------------|-------------|-------------------------|-----------|-----------|
|               |               |             | X                       | Y         | Z         |
| 1             | 6             | 0           | -2.208588               | 0.634089  | -0.119727 |
| 2             | 6             | 0           | -1.466177               | 1.840096  | 0.179040  |
| 3             | 6             | 0           | -0.113744               | 1.477850  | 0.244497  |
| 4             | 7             | 0           | 0.030323                | 0.083392  | 0.011641  |
| 5             | 6             | 0           | -1.274074               | -0.414045 | -0.206865 |
| 6             | 6             | 0           | -1.691208               | -1.702624 | -0.545068 |
| 7             | 6             | 0           | -3.042839               | -1.925364 | -0.750422 |
| 8             | 6             | 0           | -3.974214               | -0.886174 | -0.639440 |
| 9             | 6             | 0           | -3.563203               | 0.401229  | -0.330711 |
| 10            | 6             | 0           | -1.868830               | 3.155325  | 0.407077  |
| 11            | 6             | 0           | -0.924047               | 4.125228  | 0.713186  |
| 12            | 6             | 0           | 0.424831                | 3.738336  | 0.796147  |
| 13            | 6             | 0           | 0.845191                | 2.435263  | 0.575853  |
| 14            | 6             | 0           | -1.341202               | 5.563227  | 0.963160  |
| 15            | 6             | 0           | -1.019053               | 6.008637  | 2.394534  |
| 16            | 6             | 0           | -0.720005               | 6.521207  | -0.060192 |
| 17            | 1             | 0           | -0.987898               | -2.515924 | -0.652733 |
| 18            | 1             | 0           | -3.382314               | -2.920847 | -1.014704 |
| 19            | 1             | 0           | -4.282802               | 1.209705  | -0.266372 |
| 20            | 1             | 0           | -2.921412               | 3.420129  | 0.351914  |
| 21            | 1             | 0           | 1.175166                | 4.482077  | 1.048032  |
| 22            | 1             | 0           | 1.892627                | 2.182298  | 0.663431  |
| 23            | 1             | 0           | -2.430016               | 5.607160  | 0.839821  |
| 24            | 1             | 0           | -1.379151               | 7.027641  | 2.569985  |
| 25            | 1             | 0           | -1.489526               | 5.349043  | 3.130067  |
| 26            | 1             | 0           | 0.060659                | 6.001361  | 2.578408  |
| 27            | 1             | 0           | -1.078253               | 7.542866  | 0.103114  |
| 28            | 1             | 0           | -0.976296               | 6.229072  | -1.083127 |
| 29            | 1             | 0           | 0.372125                | 6.534638  | 0.021968  |
| 30            | 5             | 0           | 1.263654                | -0.673733 | -0.001028 |
| 31            | 6             | 0           | 2.610908                | 0.051790  | -0.393291 |
| 32            | 6             | 0           | 2.724918                | 0.664595  | -1.661534 |
| 33            | 6             | 0           | 3.740601                | 0.055226  | 0.453570  |
| 34            | 6             | 0           | 3.933189                | 1.239047  | -2.052277 |
| 35            | 6             | 0           | 4.924053                | 0.660818  | 0.036245  |

|    |   |   |           |           |           |
|----|---|---|-----------|-----------|-----------|
| 36 | 6 | 0 | 5.044250  | 1.257844  | -1.215312 |
| 37 | 1 | 0 | 4.006984  | 1.687037  | -3.040496 |
| 38 | 1 | 0 | 5.779961  | 0.660208  | 0.707095  |
| 39 | 6 | 0 | 1.234014  | -2.206892 | 0.379585  |
| 40 | 6 | 0 | 1.731361  | -3.209086 | -0.481784 |
| 41 | 6 | 0 | 0.757036  | -2.596276 | 1.651796  |
| 42 | 6 | 0 | 1.732878  | -4.541813 | -0.074735 |
| 43 | 6 | 0 | 0.797100  | -3.936627 | 2.031404  |
| 44 | 6 | 0 | 1.271594  | -4.929246 | 1.179898  |
| 45 | 1 | 0 | 2.112496  | -5.299241 | -0.756481 |
| 46 | 1 | 0 | 0.445176  | -4.212879 | 3.022660  |
| 47 | 6 | 0 | 3.701149  | -0.545025 | 1.839208  |
| 48 | 1 | 0 | 2.987612  | -0.019958 | 2.483956  |
| 49 | 1 | 0 | 3.405290  | -1.596735 | 1.820123  |
| 50 | 1 | 0 | 4.681100  | -0.477470 | 2.318316  |
| 51 | 6 | 0 | 1.570647  | 0.727297  | -2.637129 |
| 52 | 1 | 0 | 1.018862  | -0.213915 | -2.701977 |
| 53 | 1 | 0 | 0.851729  | 1.501846  | -2.349868 |
| 54 | 1 | 0 | 1.930264  | 0.969485  | -3.640486 |
| 55 | 6 | 0 | 6.328820  | 1.919412  | -1.639807 |
| 56 | 1 | 0 | 6.430737  | 1.931463  | -2.728390 |
| 57 | 1 | 0 | 6.366524  | 2.959951  | -1.296674 |
| 58 | 1 | 0 | 7.199165  | 1.408127  | -1.218711 |
| 59 | 6 | 0 | 0.192251  | -1.604170 | 2.644383  |
| 60 | 1 | 0 | 0.770919  | -0.678619 | 2.695313  |
| 61 | 1 | 0 | -0.835263 | -1.326531 | 2.386177  |
| 62 | 1 | 0 | 0.171304  | -2.037097 | 3.647798  |
| 63 | 6 | 0 | 2.229201  | -2.892151 | -1.872286 |
| 64 | 1 | 0 | 1.422499  | -2.515233 | -2.511011 |
| 65 | 1 | 0 | 3.014243  | -2.132375 | -1.861504 |
| 66 | 1 | 0 | 2.630514  | -3.787747 | -2.353174 |
| 67 | 6 | 0 | 1.268414  | -6.377308 | 1.593354  |
| 68 | 1 | 0 | 0.342605  | -6.873107 | 1.278811  |
| 69 | 1 | 0 | 2.099308  | -6.923993 | 1.138584  |
| 70 | 1 | 0 | 1.341066  | -6.482411 | 2.679307  |
| 71 | 6 | 0 | -5.427226 | -1.188915 | -0.817784 |
| 72 | 9 | 0 | -5.978644 | -1.709129 | 0.299166  |
| 73 | 9 | 0 | -5.637951 | -2.090321 | -1.796336 |
| 74 | 9 | 0 | -6.143904 | -0.092762 | -1.124272 |

-----

Step2

Method: cam-b3lyp/6-31+G(d,p) TD(NStates=3) SCRF(solvent=acetonitrile)

Excited State 1: Singlet-A 4.2723 eV 290.21 nm f=0.2860  
 <S\*\*2>=0.000  
 138 ->140 0.14801  
 139 ->140 0.64711

Step3

Method: cam-b3lyp/6-31+G(d,p)  
 SCRF(Solvent=acetonitrile,NonEquilibrium=Save)  
 SCF Done: E(RCAM-B3LYP) = -1695.18232082 a.u.

Step4

Method: CAM-B3LYP/6-31+G(d,p) TD(NStates=1,Root=1)  
 SCRF(Solvent=acetonitrile,ExternalIteration,NonEquilibrium=Read)

After PCM corrections, the energy is -1695.02453267 a.u.

Excited State 1: Singlet-A 4.2788 eV 289.76 nm f=0.2310  
<S\*\*2>=0.000  
135 ->140 0.10501  
138 ->140 0.15771  
139 ->140 0.64337

Step5

Method: cam-b3lyp/6-31G(d) opt freq(savenormalmodes)  
TD(NStates=1,Root=1)

Total Energy, E(TD-HF/TD-DFT) = -1694.93583202 a.u.  
Lowest frequency = 16.6593

Standard orientation:

| Center Number | Atomic Number | Atomic Type | Coordinates (Angstroms) |           |           |
|---------------|---------------|-------------|-------------------------|-----------|-----------|
|               |               |             | X                       | Y         | Z         |
| 1             | 6             | 0           | -2.271525               | 0.325596  | -0.198184 |
| 2             | 6             | 0           | -1.719603               | 1.565192  | 0.342609  |
| 3             | 6             | 0           | -0.322352               | 1.347223  | 0.452241  |
| 4             | 7             | 0           | 0.013776                | 0.091159  | 0.010658  |
| 5             | 6             | 0           | -1.167727               | -0.535347 | -0.391813 |
| 6             | 6             | 0           | -1.311949               | -1.817094 | -0.904243 |
| 7             | 6             | 0           | -2.602012               | -2.235249 | -1.233634 |
| 8             | 6             | 0           | -3.692557               | -1.394008 | -1.043915 |
| 9             | 6             | 0           | -3.539501               | -0.098207 | -0.524130 |
| 10            | 6             | 0           | -2.258585               | 2.771031  | 0.724899  |
| 11            | 6             | 0           | -1.414778               | 3.783447  | 1.227740  |
| 12            | 6             | 0           | -0.036684               | 3.545208  | 1.330467  |
| 13            | 6             | 0           | 0.532923                | 2.339724  | 0.948021  |
| 14            | 6             | 0           | -2.003811               | 5.113113  | 1.649044  |
| 15            | 6             | 0           | -1.780604               | 5.377697  | 3.143937  |
| 16            | 6             | 0           | -1.456016               | 6.266054  | 0.797423  |
| 17            | 1             | 0           | -0.455711               | -2.465866 | -1.036393 |
| 18            | 1             | 0           | -2.755315               | -3.226053 | -1.643940 |
| 19            | 1             | 0           | -4.403128               | 0.544215  | -0.393096 |
| 20            | 1             | 0           | -3.325495               | 2.955225  | 0.645834  |
| 21            | 1             | 0           | 0.608785                | 4.326293  | 1.717648  |
| 22            | 1             | 0           | 1.598660                | 2.165354  | 1.018268  |
| 23            | 1             | 0           | -3.084601               | 5.057098  | 1.478266  |
| 24            | 1             | 0           | -2.266429               | 6.313622  | 3.436305  |
| 25            | 1             | 0           | -2.194655               | 4.571656  | 3.756688  |
| 26            | 1             | 0           | -0.714719               | 5.467370  | 3.377060  |
| 27            | 1             | 0           | -1.941301               | 7.205197  | 1.080241  |
| 28            | 1             | 0           | -1.637154               | 6.094876  | -0.267703 |
| 29            | 1             | 0           | -0.377968               | 6.390003  | 0.942266  |
| 30            | 5             | 0           | 1.416066                | -0.510641 | -0.011615 |
| 31            | 6             | 0           | 2.491237                | 0.284609  | -0.822100 |
| 32            | 6             | 0           | 2.214807                | 0.895403  | -2.078486 |
| 33            | 6             | 0           | 3.804813                | 0.470931  | -0.295132 |
| 34            | 6             | 0           | 3.177716                | 1.667400  | -2.725158 |
| 35            | 6             | 0           | 4.735884                | 1.246450  | -0.977380 |
| 36            | 6             | 0           | 4.447902                | 1.865204  | -2.194528 |
| 37            | 1             | 0           | 2.932521                | 2.112792  | -3.687418 |
| 38            | 1             | 0           | 5.721341                | 1.386780  | -0.537092 |

|    |   |   |           |           |           |
|----|---|---|-----------|-----------|-----------|
| 39 | 6 | 0 | 1.606623  | -1.855872 | 0.768648  |
| 40 | 6 | 0 | 2.364842  | -2.919908 | 0.196469  |
| 41 | 6 | 0 | 1.019841  | -2.102755 | 2.040875  |
| 42 | 6 | 0 | 2.491214  | -4.135356 | 0.861735  |
| 43 | 6 | 0 | 1.169610  | -3.337244 | 2.670146  |
| 44 | 6 | 0 | 1.898706  | -4.375566 | 2.101218  |
| 45 | 1 | 0 | 3.062115  | -4.932380 | 0.388942  |
| 46 | 1 | 0 | 0.714311  | -3.485463 | 3.647507  |
| 47 | 6 | 0 | 4.218625  | -0.104812 | 1.037086  |
| 48 | 1 | 0 | 3.471102  | 0.110091  | 1.808547  |
| 49 | 1 | 0 | 4.322775  | -1.193871 | 1.006916  |
| 50 | 1 | 0 | 5.176847  | 0.314483  | 1.357096  |
| 51 | 6 | 0 | 0.901379  | 0.679144  | -2.784984 |
| 52 | 1 | 0 | 0.620358  | -0.380308 | -2.785831 |
| 53 | 1 | 0 | 0.075834  | 1.224949  | -2.314221 |
| 54 | 1 | 0 | 0.957515  | 1.016265  | -3.823825 |
| 55 | 6 | 0 | 5.469548  | 2.722599  | -2.893657 |
| 56 | 1 | 0 | 5.219952  | 2.858370  | -3.949927 |
| 57 | 1 | 0 | 5.532168  | 3.720634  | -2.442446 |
| 58 | 1 | 0 | 6.470530  | 2.283196  | -2.835091 |
| 59 | 6 | 0 | 0.263797  | -1.029320 | 2.780631  |
| 60 | 1 | 0 | 0.807014  | -0.077501 | 2.767230  |
| 61 | 1 | 0 | -0.723286 | -0.837396 | 2.344177  |
| 62 | 1 | 0 | 0.102748  | -1.314671 | 3.823984  |
| 63 | 6 | 0 | 3.009437  | -2.801246 | -1.163482 |
| 64 | 1 | 0 | 2.302999  | -2.408033 | -1.902628 |
| 65 | 1 | 0 | 3.864157  | -2.117771 | -1.162606 |
| 66 | 1 | 0 | 3.362162  | -3.777477 | -1.508502 |
| 67 | 6 | 0 | 2.030025  | -5.712366 | 2.782564  |
| 68 | 1 | 0 | 1.339436  | -6.450074 | 2.355585  |
| 69 | 1 | 0 | 3.039852  | -6.120893 | 2.674259  |
| 70 | 1 | 0 | 1.806944  | -5.638491 | 3.850863  |
| 71 | 6 | 0 | -5.075242 | -1.887190 | -1.346022 |
| 72 | 9 | 0 | -5.692139 | -2.350465 | -0.241303 |
| 73 | 9 | 0 | -5.073156 | -2.888845 | -2.240189 |
| 74 | 9 | 0 | -5.855041 | -0.907806 | -1.838167 |

-----

Step6

Method: cam-b3lyp/6-31+G(d,p) TD(NStates=1, Root=1)  
 SCRF(Solvent=acetonitrile,ExternalIteration,NonEquilibrium=Save)  
 After PCM corrections, the energy is -1695.06377344 a.u.

Excited State 1: Singlet-A 2.9268 eV 423.62 nm f=0.0511  
 <S\*\*2>=0.000  
 139 ->140 0.67838

Step7

Method: cam-b3lyp/6-31+G(d,p) SCRF(Solvent=acetonitrile,  
 NonEquilibrium=Read)

SCF Done: E(RCAM-B3LYP) = -1695.16254690 a.u.

Results

|                 |   |            |          |            |
|-----------------|---|------------|----------|------------|
| Absorb Energy   | = | 0.158 a.u. | 4.294 eV | 288.763 nm |
| Emission Energy | = | 0.099 a.u. | 2.688 eV | 461.291 nm |

```

-----|-----|-----|-----
Stokes Shift      = | 0.059 a.u. | 1.606 eV | 172.529 nm
-----|-----|-----|-----

```

Compound 5 n-hexane

Step1

Method: cam-b3lyp/6-31G(d)  
Solvent : n-Hexane  
SCF Done: E(RCAM-B3LYP) = -1393.77783157 a.u.  
Lowest frequency = 18.8655

Standard orientation:

```

-----|-----|-----|-----|-----|-----
Center   Atomic   Atomic   Coordinates (Angstroms)
Number   Number   Type     X           Y           Z
-----|-----|-----|-----|-----|-----

```

| Center Number | Atomic Number | Atomic Type | X         | Y         | Z         |
|---------------|---------------|-------------|-----------|-----------|-----------|
| 1             | 5             | 0           | -0.584364 | -0.220907 | -0.046159 |
| 2             | 6             | 0           | -2.640716 | -1.354851 | -1.981755 |
| 3             | 1             | 0           | -2.030094 | -0.619249 | -2.514029 |
| 4             | 1             | 0           | -2.054387 | -2.276409 | -1.925991 |
| 5             | 1             | 0           | -3.523170 | -1.555170 | -2.595307 |
| 6             | 6             | 0           | -0.782909 | -2.918608 | 1.383865  |
| 7             | 1             | 0           | -0.548522 | -3.867251 | 1.874306  |
| 8             | 1             | 0           | -0.622756 | -2.122416 | 2.116778  |
| 9             | 1             | 0           | -1.852007 | -2.917538 | 1.151976  |
| 10            | 6             | 0           | 1.132504  | -0.223078 | -2.550506 |
| 11            | 1             | 0           | 0.232084  | 0.394636  | -2.588676 |
| 12            | 1             | 0           | 1.938331  | 0.409579  | -2.165415 |
| 13            | 1             | 0           | 1.391780  | -0.491291 | -3.578207 |
| 14            | 6             | 0           | 2.178495  | -5.076300 | -2.011072 |
| 15            | 1             | 0           | 3.113154  | -5.241276 | -1.462489 |
| 16            | 1             | 0           | 1.563317  | -5.971367 | -1.877987 |
| 17            | 1             | 0           | 2.431513  | -4.990575 | -3.071271 |
| 18            | 6             | 0           | 1.471859  | -3.843770 | -1.512840 |
| 19            | 6             | 0           | 0.702483  | -3.879361 | -0.352549 |
| 20            | 1             | 0           | 0.598512  | -4.819583 | 0.184400  |
| 21            | 6             | 0           | 0.054074  | -2.750447 | 0.134959  |
| 22            | 6             | 0           | 0.191825  | -1.507151 | -0.528328 |
| 23            | 6             | 0           | 0.958593  | -1.471443 | -1.713855 |
| 24            | 6             | 0           | 1.571787  | -2.633271 | -2.184003 |
| 25            | 1             | 0           | 2.145101  | -2.585859 | -3.106941 |
| 26            | 6             | 0           | -2.598672 | 0.157114  | 1.540436  |
| 27            | 6             | 0           | -3.944581 | 0.010216  | 1.868429  |
| 28            | 1             | 0           | -4.289771 | 0.354048  | 2.840749  |
| 29            | 6             | 0           | -4.860468 | -0.552178 | 0.985626  |
| 30            | 6             | 0           | -4.392405 | -0.973675 | -0.255135 |
| 31            | 1             | 0           | -5.093997 | -1.398375 | -0.969438 |
| 32            | 6             | 0           | -3.049417 | -0.869522 | -0.609442 |
| 33            | 6             | 0           | -2.123526 | -0.296604 | 0.289615  |
| 34            | 6             | 0           | -1.696972 | 0.816074  | 2.560922  |
| 35            | 1             | 0           | -1.420825 | 1.829124  | 2.252470  |
| 36            | 1             | 0           | -2.204027 | 0.890039  | 3.526507  |
| 37            | 1             | 0           | -0.763502 | 0.268707  | 2.720281  |
| 38            | 6             | 0           | -6.307568 | -0.718004 | 1.367510  |
| 39            | 1             | 0           | -6.960832 | -0.660113 | 0.492276  |
| 40            | 1             | 0           | -6.480459 | -1.692747 | 1.838727  |
| 41            | 1             | 0           | -6.623023 | 0.048625  | 2.080805  |

|    |   |   |           |           |           |
|----|---|---|-----------|-----------|-----------|
| 42 | 7 | 0 | 0.089092  | 1.069255  | 0.048832  |
| 43 | 6 | 0 | -0.476809 | 2.265138  | -0.477835 |
| 44 | 6 | 0 | 1.462758  | 1.342074  | 0.248296  |
| 45 | 6 | 0 | 0.545024  | 3.204590  | -0.699438 |
| 46 | 6 | 0 | -1.793674 | 2.567503  | -0.829629 |
| 47 | 6 | 0 | 1.772781  | 2.606421  | -0.237498 |
| 48 | 6 | 0 | 2.444966  | 0.579129  | 0.952965  |
| 49 | 6 | 0 | 0.263762  | 4.451719  | -1.256303 |
| 50 | 6 | 0 | -2.058492 | 3.816044  | -1.375271 |
| 51 | 1 | 0 | -2.598073 | 1.862437  | -0.679540 |
| 52 | 6 | 0 | 3.091489  | 3.109829  | -0.205033 |
| 53 | 6 | 0 | 3.777613  | 1.091818  | 0.953255  |
| 54 | 6 | 0 | 2.183208  | -0.586852 | 1.710857  |
| 55 | 6 | 0 | -1.044517 | 4.755142  | -1.590797 |
| 56 | 1 | 0 | 1.060461  | 5.170764  | -1.422035 |
| 57 | 1 | 0 | -3.081977 | 4.063905  | -1.639054 |
| 58 | 6 | 0 | 4.076612  | 2.344839  | 0.344222  |
| 59 | 1 | 0 | 3.309499  | 4.089433  | -0.618934 |
| 60 | 6 | 0 | 4.794136  | 0.363475  | 1.617360  |
| 61 | 6 | 0 | 3.185180  | -1.253667 | 2.367264  |
| 62 | 1 | 0 | 1.170849  | -0.952868 | 1.790209  |
| 63 | 1 | 0 | -1.286170 | 5.721856  | -2.020897 |
| 64 | 1 | 0 | 5.103242  | 2.697832  | 0.368543  |
| 65 | 6 | 0 | 4.513647  | -0.789268 | 2.302078  |
| 66 | 1 | 0 | 5.807701  | 0.753787  | 1.589620  |
| 67 | 1 | 0 | 2.950023  | -2.141301 | 2.946001  |
| 68 | 1 | 0 | 5.303788  | -1.330103 | 2.813311  |

-----

Step2

Method: cam-b3lyp/6-31+G(d,p) TD(NStates=3) SCRF(solvent=n-hexane)

Excited State 1: Singlet-A 3.9277 eV 315.67 nm f=0.2326  
 <S\*\*2>=0.000  
 123 ->125 0.23242  
 124 ->125 0.62910

Step3

Method: cam-b3lyp/6-31+G(d,p) SCRF(Solvent=n-hexane,NonEquilibrium=Save)  
 SCF Done: E(RCAM-B3LYP) = -1393.86204896 a.u.

Step4

Method: CAM-B3LYP/6-31+G(d,p) TD(NStates=1,Root=1)  
 SCRF(Solvent=n-hexane,ExternalIteration,NonEquilibrium=Read)

After PCM corrections, the energy is -1393.71917752 a.u.

Excited State 1: Singlet-A 3.9014 eV 317.79 nm f=0.1647  
 <S\*\*2>=0.000  
 123 ->125 -0.19224  
 124 ->125 -0.64483

Step5

Method: cam-b3lyp/6-31G(d) opt freq(savenormalmodes)  
 TD(NStates=1,Root=1)

Total Energy, E(TD-HF/TD-DFT) = -1393.65321527 a.u.

Lowest frequency = 19.9275

Standard orientation:

| Center<br>Number | Atomic<br>Number | Atomic<br>Type | Coordinates (Angstroms) |           |           |
|------------------|------------------|----------------|-------------------------|-----------|-----------|
|                  |                  |                | X                       | Y         | Z         |
| 1                | 5                | 0              | -0.565192               | -0.393994 | -0.117039 |
| 2                | 6                | 0              | -3.020877               | -1.780300 | -1.218089 |
| 3                | 1                | 0              | -2.428213               | -1.330650 | -2.021773 |
| 4                | 1                | 0              | -2.534957               | -2.732549 | -0.985571 |
| 5                | 1                | 0              | -4.018358               | -2.002103 | -1.609027 |
| 6                | 6                | 0              | -0.900504               | -2.966149 | 1.421732  |
| 7                | 1                | 0              | -0.709432               | -3.901944 | 1.955310  |
| 8                | 1                | 0              | -0.629534               | -2.133207 | 2.079013  |
| 9                | 1                | 0              | -1.981184               | -2.883729 | 1.271046  |
| 10               | 6                | 0              | 1.014324                | -0.690259 | -2.770485 |
| 11               | 1                | 0              | 0.062563                | -0.200964 | -3.001050 |
| 12               | 1                | 0              | 1.681828                | 0.080425  | -2.371096 |
| 13               | 1                | 0              | 1.448832                | -1.032975 | -3.713827 |
| 14               | 6                | 0              | 1.877032                | -5.520611 | -1.848646 |
| 15               | 1                | 0              | 2.875223                | -5.628182 | -1.405577 |
| 16               | 1                | 0              | 1.286178                | -6.382792 | -1.524314 |
| 17               | 1                | 0              | 1.998519                | -5.584238 | -2.934446 |
| 18               | 6                | 0              | 1.227860                | -4.223920 | -1.443367 |
| 19               | 6                | 0              | 0.454880                | -4.127527 | -0.290246 |
| 20               | 1                | 0              | 0.309932                | -5.016507 | 0.320899  |
| 21               | 6                | 0              | -0.128959               | -2.933588 | 0.122668  |
| 22               | 6                | 0              | 0.043749                | -1.734238 | -0.635313 |
| 23               | 6                | 0              | 0.824262                | -1.848978 | -1.822458 |
| 24               | 6                | 0              | 1.390662                | -3.064064 | -2.193965 |
| 25               | 1                | 0              | 1.966586                | -3.111271 | -3.116392 |
| 26               | 6                | 0              | -2.232769               | 0.708917  | 1.594103  |
| 27               | 6                | 0              | -3.517383               | 0.881691  | 2.099440  |
| 28               | 1                | 0              | -3.663695               | 1.565129  | 2.933888  |
| 29               | 6                | 0              | -4.616323               | 0.201904  | 1.584313  |
| 30               | 6                | 0              | -4.385029               | -0.661594 | 0.517975  |
| 31               | 1                | 0              | -5.229159               | -1.186888 | 0.074924  |
| 32               | 6                | 0              | -3.116665               | -0.865305 | -0.019432 |
| 33               | 6                | 0              | -1.981702               | -0.184222 | 0.514795  |
| 34               | 6                | 0              | -1.121161               | 1.479545  | 2.261553  |
| 35               | 1                | 0              | -0.777265               | 2.322858  | 1.651762  |
| 36               | 1                | 0              | -1.455300               | 1.891316  | 3.218225  |
| 37               | 1                | 0              | -0.250803               | 0.844215  | 2.455516  |
| 38               | 6                | 0              | -5.993124               | 0.375653  | 2.169011  |
| 39               | 1                | 0              | -6.770367               | 0.223633  | 1.413654  |
| 40               | 1                | 0              | -6.181673               | -0.344551 | 2.975003  |
| 41               | 1                | 0              | -6.125217               | 1.375808  | 2.593163  |
| 42               | 7                | 0              | 0.245183                | 0.905028  | -0.355452 |
| 43               | 6                | 0              | -0.256448               | 1.932413  | -1.191247 |
| 44               | 6                | 0              | 1.444324                | 1.319825  | 0.123104  |
| 45               | 6                | 0              | 0.652359                | 3.000230  | -1.245147 |
| 46               | 6                | 0              | -1.456088               | 1.966111  | -1.879375 |
| 47               | 6                | 0              | 1.760746                | 2.612932  | -0.407914 |
| 48               | 6                | 0              | 2.358648                | 0.670607  | 1.034927  |
| 49               | 6                | 0              | 0.370335                | 4.127499  | -2.001420 |
| 50               | 6                | 0              | -1.727203               | 3.106078  | -2.645886 |
| 51               | 1                | 0              | -2.165072               | 1.152123  | -1.813866 |
| 52               | 6                | 0              | 2.943672                | 3.266323  | -0.088602 |



|    |   |   |           |           |           |
|----|---|---|-----------|-----------|-----------|
| 53 | 6 | 0 | 3.556874  | 1.382212  | 1.349681  |
| 54 | 6 | 0 | 2.154841  | -0.582027 | 1.633582  |
| 55 | 6 | 0 | -0.833846 | 4.170349  | -2.707813 |
| 56 | 1 | 0 | 1.063853  | 4.961629  | -2.043896 |
| 57 | 1 | 0 | -2.659445 | 3.157248  | -3.198356 |
| 58 | 6 | 0 | 3.823978  | 2.654473  | 0.778601  |
| 59 | 1 | 0 | 3.166345  | 4.242031  | -0.506877 |
| 60 | 6 | 0 | 4.486462  | 0.814482  | 2.248671  |
| 61 | 6 | 0 | 3.084497  | -1.111258 | 2.510800  |
| 62 | 1 | 0 | 1.266559  | -1.144246 | 1.392672  |
| 63 | 1 | 0 | -1.075061 | 5.042759  | -3.305449 |
| 64 | 1 | 0 | 4.750730  | 3.151619  | 1.047421  |
| 65 | 6 | 0 | 4.254883  | -0.411330 | 2.827786  |
| 66 | 1 | 0 | 5.392469  | 1.368519  | 2.475377  |
| 67 | 1 | 0 | 2.900702  | -2.086288 | 2.949532  |
| 68 | 1 | 0 | 4.976254  | -0.836697 | 3.517443  |

#### Step6

Method: cam-b3lyp/6-31+G(d,p) TD(NStates=1, Root=1)  
 SCRF(Solvent=n-hexane,ExternalIteration,NonEquilibrium=Save)  
 After PCM corrections, the energy is -1393.74431918 a.u.

Excited State 1: Singlet-A 2.8366 eV 437.09 nm f=0.0435  
 <S\*\*2>=0.000  
 123 ->125 0.10034  
 124 ->125 0.67910

#### Step7

Method: cam-b3lyp/6-31+G(d,p) SCRF(Solvent=n-hexane,  
 NonEquilibrium=Read)

SCF Done: E(RCAM-B3LYP) = -1393.84716648 a.u.

#### Results

|                 |   |            |          |            |
|-----------------|---|------------|----------|------------|
| Absorb Energy   | = | 0.143 a.u. | 3.888 eV | 318.911 nm |
| Emission Energy | = | 0.103 a.u. | 2.799 eV | 443.019 nm |
| Stokes Shift    | = | 0.040 a.u. | 1.089 eV | 124.108 nm |

#### Compound 5 THF

#### Step1

Method: cam-b3lyp/6-31G(d)  
 Solvent : TetraHydroFuran  
 SCF Done: E(RCAM-B3LYP) = -1393.78151870 a.u.  
 Lowest frequency = 18.1416

#### Standard orientation:

| Center Number | Atomic Number | Atomic Type | Coordinates (Angstroms) |           |           |
|---------------|---------------|-------------|-------------------------|-----------|-----------|
|               |               |             | X                       | Y         | Z         |
| 1             | 5             | 0           | -0.585914               | -0.225452 | -0.049532 |

|    |   |   |           |           |           |
|----|---|---|-----------|-----------|-----------|
| 2  | 6 | 0 | -2.648664 | -1.379552 | -1.968953 |
| 3  | 1 | 0 | -2.035297 | -0.651831 | -2.508665 |
| 4  | 1 | 0 | -2.067524 | -2.304071 | -1.906440 |
| 5  | 1 | 0 | -3.533540 | -1.580762 | -2.578503 |
| 6  | 6 | 0 | -0.769869 | -2.926428 | 1.378432  |
| 7  | 1 | 0 | -0.526931 | -3.872083 | 1.870100  |
| 8  | 1 | 0 | -0.618168 | -2.127766 | 2.110273  |
| 9  | 1 | 0 | -1.838616 | -2.936518 | 1.144690  |
| 10 | 6 | 0 | 1.118306  | -0.219374 | -2.561382 |
| 11 | 1 | 0 | 0.205450  | 0.379112  | -2.612221 |
| 12 | 1 | 0 | 1.906332  | 0.431177  | -2.169304 |
| 13 | 1 | 0 | 1.395083  | -0.485845 | -3.584814 |
| 14 | 6 | 0 | 2.201188  | -5.065848 | -2.020551 |
| 15 | 1 | 0 | 3.135915  | -5.227115 | -1.471049 |
| 16 | 1 | 0 | 1.590351  | -5.963884 | -1.888259 |
| 17 | 1 | 0 | 2.454800  | -4.976880 | -3.080259 |
| 18 | 6 | 0 | 1.488105  | -3.837515 | -1.520962 |
| 19 | 6 | 0 | 0.720781  | -3.877547 | -0.359031 |
| 20 | 1 | 0 | 0.623805  | -4.818162 | 0.178373  |
| 21 | 6 | 0 | 0.065419  | -2.752280 | 0.129207  |
| 22 | 6 | 0 | 0.194188  | -1.508239 | -0.534658 |
| 23 | 6 | 0 | 0.958006  | -1.468217 | -1.722419 |
| 24 | 6 | 0 | 1.578630  | -2.626132 | -2.193331 |
| 25 | 1 | 0 | 2.148757  | -2.575864 | -3.118050 |
| 26 | 6 | 0 | -2.594785 | 0.160217  | 1.542160  |
| 27 | 6 | 0 | -3.939940 | 0.015571  | 1.875341  |
| 28 | 1 | 0 | -4.282195 | 0.365421  | 2.846501  |
| 29 | 6 | 0 | -4.858874 | -0.552912 | 0.998936  |
| 30 | 6 | 0 | -4.394284 | -0.983405 | -0.240434 |
| 31 | 1 | 0 | -5.098004 | -1.413177 | -0.949511 |
| 32 | 6 | 0 | -3.052005 | -0.881912 | -0.599346 |
| 33 | 6 | 0 | -2.123135 | -0.301894 | 0.292590  |
| 34 | 6 | 0 | -1.690410 | 0.823428  | 2.557787  |
| 35 | 1 | 0 | -1.410388 | 1.833339  | 2.242523  |
| 36 | 1 | 0 | -2.197343 | 0.906023  | 3.522598  |
| 37 | 1 | 0 | -0.759454 | 0.273005  | 2.721264  |
| 38 | 6 | 0 | -6.304889 | -0.715653 | 1.386152  |
| 39 | 1 | 0 | -6.960357 | -0.663934 | 0.512285  |
| 40 | 1 | 0 | -6.475929 | -1.687439 | 1.863996  |
| 41 | 1 | 0 | -6.617455 | 0.055206  | 2.096031  |
| 42 | 7 | 0 | 0.086676  | 1.067071  | 0.042378  |
| 43 | 6 | 0 | -0.479179 | 2.259753  | -0.489488 |
| 44 | 6 | 0 | 1.458190  | 1.343208  | 0.248192  |
| 45 | 6 | 0 | 0.540907  | 3.202927  | -0.705477 |
| 46 | 6 | 0 | -1.794860 | 2.556882  | -0.851479 |
| 47 | 6 | 0 | 1.767925  | 2.608571  | -0.236356 |
| 48 | 6 | 0 | 2.439148  | 0.583144  | 0.958347  |
| 49 | 6 | 0 | 0.259012  | 4.449361  | -1.264967 |
| 50 | 6 | 0 | -2.060870 | 3.804320  | -1.399636 |
| 51 | 1 | 0 | -2.597176 | 1.847924  | -0.708345 |
| 52 | 6 | 0 | 3.085450  | 3.115864  | -0.197579 |
| 53 | 6 | 0 | 3.770842  | 1.099251  | 0.964647  |
| 54 | 6 | 0 | 2.176293  | -0.582574 | 1.716971  |
| 55 | 6 | 0 | -1.048547 | 4.747703  | -1.608222 |
| 56 | 1 | 0 | 1.054080  | 5.171143  | -1.426224 |
| 57 | 1 | 0 | -3.083199 | 4.048002  | -1.671586 |
| 58 | 6 | 0 | 4.070098  | 2.353273  | 0.356685  |
| 59 | 1 | 0 | 3.303098  | 4.095847  | -0.610635 |
| 60 | 6 | 0 | 4.786418  | 0.373598  | 1.634175  |
| 61 | 6 | 0 | 3.176887  | -1.246543 | 2.379292  |

|    |   |   |           |           |           |
|----|---|---|-----------|-----------|-----------|
| 62 | 1 | 0 | 1.164285  | -0.950162 | 1.793852  |
| 63 | 1 | 0 | -1.290945 | 5.713216  | -2.040488 |
| 64 | 1 | 0 | 5.095667  | 2.708773  | 0.385583  |
| 65 | 6 | 0 | 4.505132  | -0.779402 | 2.319067  |
| 66 | 1 | 0 | 5.799207  | 0.765975  | 1.610766  |
| 67 | 1 | 0 | 2.940905  | -2.132878 | 2.959629  |
| 68 | 1 | 0 | 5.293953  | -1.317881 | 2.834632  |

-----

Step2

Method: cam-b3lyp/6-31+G(d,p) TD(NStates=3) SCRF(solvent=THF)

Excited State 1: Singlet-A 3.9286 eV 315.59 nm f=0.2383  
 <S\*\*2>=0.000  
 123 ->125 0.24047  
 124 ->125 0.62557

Step3

Method: cam-b3lyp/6-31+G(d,p) SCRF(Solvent=THF,NonEquilibrium=Save)  
 SCF Done: E(RCAM-B3LYP) = -1393.86601871 a.u.

Step4

Method: CAM-B3LYP/6-31+G(d,p) TD(NStates=1,Root=1)  
 SCRF(Solvent=THF,ExternalIteration,NonEquilibrium=Read)

After PCM corrections, the energy is -1393.72245248 a.u.

Excited State 1: Singlet-A 3.9036 eV 317.61 nm f=0.1669  
 <S\*\*2>=0.000  
 123 ->125 -0.20144  
 124 ->125 -0.64130

Step5

Method: cam-b3lyp/6-31G(d) opt freq(savenormalmodes)  
 TD(NStates=1,Root=1)

Total Energy, E(TD-HF/TD-DFT) = -1393.65549567 a.u.  
 Lowest frequency = 23.0622

Standard orientation:

| Center Number | Atomic Number | Atomic Type | Coordinates (Angstroms) |           |           |
|---------------|---------------|-------------|-------------------------|-----------|-----------|
|               |               |             | X                       | Y         | Z         |
| 1             | 5             | 0           | -0.556789               | -0.397247 | -0.116628 |
| 2             | 6             | 0           | -2.972928               | -1.836518 | -1.253273 |
| 3             | 1             | 0           | -2.387185               | -1.359810 | -2.046405 |
| 4             | 1             | 0           | -2.462876               | -2.777273 | -1.025152 |
| 5             | 1             | 0           | -3.960718               | -2.081440 | -1.654666 |
| 6             | 6             | 0           | -0.828594               | -2.996460 | 1.402757  |
| 7             | 1             | 0           | -0.615300               | -3.930635 | 1.930458  |
| 8             | 1             | 0           | -0.584029               | -2.161852 | 2.068208  |
| 9             | 1             | 0           | -1.909901               | -2.943494 | 1.242771  |
| 10            | 6             | 0           | 1.033204                | -0.632634 | -2.762577 |
| 11            | 1             | 0           | 0.068933                | -0.162765 | -2.981124 |
| 12            | 1             | 0           | 1.684972                | 0.149001  | -2.358243 |

|    |   |   |           |           |           |
|----|---|---|-----------|-----------|-----------|
| 13 | 1 | 0 | 1.470242  | -0.955948 | -3.711595 |
| 14 | 6 | 0 | 2.040482  | -5.443571 | -1.872715 |
| 15 | 1 | 0 | 3.027423  | -5.537330 | -1.402438 |
| 16 | 1 | 0 | 1.461063  | -6.325082 | -1.581390 |
| 17 | 1 | 0 | 2.194834  | -5.482288 | -2.955346 |
| 18 | 6 | 0 | 1.350944  | -4.169512 | -1.461219 |
| 19 | 6 | 0 | 0.570632  | -4.105060 | -0.309767 |
| 20 | 1 | 0 | 0.450581  | -5.002438 | 0.294465  |
| 21 | 6 | 0 | -0.049964 | -2.931495 | 0.109170  |
| 22 | 6 | 0 | 0.091368  | -1.722107 | -0.637920 |
| 23 | 6 | 0 | 0.875678  | -1.804352 | -1.824450 |
| 24 | 6 | 0 | 1.480424  | -3.000030 | -2.203391 |
| 25 | 1 | 0 | 2.060617  | -3.022865 | -3.124068 |
| 26 | 6 | 0 | -2.265408 | 0.635931  | 1.593630  |
| 27 | 6 | 0 | -3.558549 | 0.773018  | 2.092212  |
| 28 | 1 | 0 | -3.726754 | 1.442963  | 2.933411  |
| 29 | 6 | 0 | -4.637669 | 0.074479  | 1.560611  |
| 30 | 6 | 0 | -4.378881 | -0.771327 | 0.484893  |
| 31 | 1 | 0 | -5.207664 | -1.310134 | 0.029180  |
| 32 | 6 | 0 | -3.102029 | -0.938177 | -0.045257 |
| 33 | 6 | 0 | -1.988053 | -0.235720 | 0.503975  |
| 34 | 6 | 0 | -1.175061 | 1.422635  | 2.277182  |
| 35 | 1 | 0 | -0.843318 | 2.277998  | 1.677424  |
| 36 | 1 | 0 | -1.524332 | 1.818327  | 3.235248  |
| 37 | 1 | 0 | -0.292547 | 0.803435  | 2.468993  |
| 38 | 6 | 0 | -6.023353 | 0.209281  | 2.135350  |
| 39 | 1 | 0 | -6.789429 | 0.113639  | 1.359490  |
| 40 | 1 | 0 | -6.225603 | -0.567165 | 2.883646  |
| 41 | 1 | 0 | -6.159425 | 1.176375  | 2.628596  |
| 42 | 7 | 0 | 0.214212  | 0.915906  | -0.337544 |
| 43 | 6 | 0 | -0.314079 | 1.945624  | -1.157185 |
| 44 | 6 | 0 | 1.416701  | 1.346361  | 0.130284  |
| 45 | 6 | 0 | 0.579315  | 3.026208  | -1.211611 |
| 46 | 6 | 0 | -1.517935 | 1.964597  | -1.838809 |
| 47 | 6 | 0 | 1.707228  | 2.645617  | -0.395387 |
| 48 | 6 | 0 | 2.343844  | 0.707967  | 1.034613  |
| 49 | 6 | 0 | 0.272811  | 4.156242  | -1.953605 |
| 50 | 6 | 0 | -1.815646 | 3.108746  | -2.590042 |
| 51 | 1 | 0 | -2.209468 | 1.134667  | -1.785268 |
| 52 | 6 | 0 | 2.886820  | 3.311890  | -0.091682 |
| 53 | 6 | 0 | 3.539564  | 1.431830  | 1.334921  |
| 54 | 6 | 0 | 2.153363  | -0.540113 | 1.647884  |
| 55 | 6 | 0 | -0.940172 | 4.187954  | -2.646938 |
| 56 | 1 | 0 | 0.953957  | 5.000115  | -1.996157 |
| 57 | 1 | 0 | -2.752107 | 3.149479  | -3.136116 |
| 58 | 6 | 0 | 3.787410  | 2.705645  | 0.759919  |
| 59 | 1 | 0 | 3.091957  | 4.292026  | -0.507975 |
| 60 | 6 | 0 | 4.482158  | 0.876279  | 2.228888  |
| 61 | 6 | 0 | 3.092630  | -1.054505 | 2.524896  |
| 62 | 1 | 0 | 1.264988  | -1.108785 | 1.422358  |
| 63 | 1 | 0 | -1.200187 | 5.062696  | -3.232979 |
| 64 | 1 | 0 | 4.712580  | 3.211925  | 1.015924  |
| 65 | 6 | 0 | 4.263039  | -0.345652 | 2.822178  |
| 66 | 1 | 0 | 5.386457  | 1.437927  | 2.442341  |
| 67 | 1 | 0 | 2.917509  | -2.024452 | 2.978483  |
| 68 | 1 | 0 | 4.993434  | -0.760351 | 3.508663  |

-----

Step6

Method: cam-b3lyp/6-31+G(d,p) TD(NStates=1, Root=1)  
 SCRF(Solvent=THF,ExternalIteration,NonEquilibrium=Save)  
 After PCM corrections, the energy is -1393.75634247 a.u.

Excited State 1: Singlet-A 2.7214 eV 455.59 nm f=0.0470  
 <S\*\*2>=0.000  
 124 ->125 0.68084

Step7

Method: cam-b3lyp/6-31+G(d,p) SCRF(Solvent=THF, NonEquilibrium=Read)

SCF Done: E(RCAM-B3LYP) = -1393.84902497 a.u.

Results

| -----           |   |            |                       |
|-----------------|---|------------|-----------------------|
| Absorb Energy   | = | 0.144 a.u. | 3.907 eV   317.368 nm |
| Emission Energy | = | 0.093 a.u. | 2.522 eV   491.607 nm |
| Stokes Shift    | = | 0.051 a.u. | 1.385 eV   174.239 nm |
| -----           |   |            |                       |

Compound 5 ACN

Step1

Method: cam-b3lyp/6-31G(d)  
 Solvent : Acetonitrile  
 SCF Done: E(RCAM-B3LYP) = -1393.78312542 a.u.  
 Lowest frequency = 18.7150

Standard orientation:

| -----            |                  |                |                         |           |           |  |
|------------------|------------------|----------------|-------------------------|-----------|-----------|--|
| Center<br>Number | Atomic<br>Number | Atomic<br>Type | Coordinates (Angstroms) |           |           |  |
|                  |                  |                | X                       | Y         | Z         |  |
| -----            |                  |                |                         |           |           |  |
| 1                | 5                | 0              | -0.586902               | -0.228896 | -0.051399 |  |
| 2                | 6                | 0              | -2.649856               | -1.401760 | -1.960498 |  |
| 3                | 1                | 0              | -2.033645               | -0.679770 | -2.504451 |  |
| 4                | 1                | 0              | -2.072510               | -2.328319 | -1.891994 |  |
| 5                | 1                | 0              | -3.535335               | -1.603638 | -2.568851 |  |
| 6                | 6                | 0              | -0.758264               | -2.931880 | 1.375147  |  |
| 7                | 1                | 0              | -0.507874               | -3.874479 | 1.868759  |  |
| 8                | 1                | 0              | -0.614969               | -2.130632 | 2.105727  |  |
| 9                | 1                | 0              | -1.826453               | -2.952167 | 1.139177  |  |
| 10               | 6                | 0              | 1.110572                | -0.215230 | -2.567398 |  |
| 11               | 1                | 0              | 0.190800                | 0.372175  | -2.623269 |  |
| 12               | 1                | 0              | 1.889137                | 0.445385  | -2.173138 |  |
| 13               | 1                | 0              | 1.394893                | -0.480377 | -3.589040 |  |
| 14               | 6                | 0              | 2.225960                | -5.054693 | -2.023165 |  |
| 15               | 1                | 0              | 3.160753                | -5.211473 | -1.472493 |  |
| 16               | 1                | 0              | 1.619694                | -5.955846 | -1.891473 |  |
| 17               | 1                | 0              | 2.480332                | -4.963801 | -3.082487 |  |
| 18               | 6                | 0              | 1.505848                | -3.830335 | -1.523807 |  |
| 19               | 6                | 0              | 0.739342                | -3.874371 | -0.361254 |  |
| 20               | 1                | 0              | 0.648447                | -4.815231 | 0.176684  |  |
| 21               | 6                | 0              | 0.076746                | -2.752799 | 0.126451  |  |
| 22               | 6                | 0              | 0.197873                | -1.508290 | -0.538087 |  |
| 23               | 6                | 0              | 0.960287                | -1.464401 | -1.726868 |  |

|    |   |   |           |           |           |
|----|---|---|-----------|-----------|-----------|
| 24 | 6 | 0 | 1.588061  | -2.618715 | -2.197510 |
| 25 | 1 | 0 | 2.156464  | -2.565861 | -3.123130 |
| 26 | 6 | 0 | -2.594201 | 0.159494  | 1.541800  |
| 27 | 6 | 0 | -3.938897 | 0.014591  | 1.877076  |
| 28 | 1 | 0 | -4.280743 | 0.368677  | 2.846817  |
| 29 | 6 | 0 | -4.857981 | -0.559877 | 1.004452  |
| 30 | 6 | 0 | -4.393821 | -0.996714 | -0.232996 |
| 31 | 1 | 0 | -5.097542 | -1.431606 | -0.938892 |
| 32 | 6 | 0 | -3.051919 | -0.895193 | -0.593736 |
| 33 | 6 | 0 | -2.122954 | -0.308250 | 0.293860  |
| 34 | 6 | 0 | -1.690147 | 0.827920  | 2.554442  |
| 35 | 1 | 0 | -1.410409 | 1.836511  | 2.234707  |
| 36 | 1 | 0 | -2.197414 | 0.914729  | 3.518649  |
| 37 | 1 | 0 | -0.759292 | 0.278225  | 2.720825  |
| 38 | 6 | 0 | -6.303469 | -0.722221 | 1.393734  |
| 39 | 1 | 0 | -6.959614 | -0.675651 | 0.520130  |
| 40 | 1 | 0 | -6.472769 | -1.691952 | 1.876294  |
| 41 | 1 | 0 | -6.615973 | 0.051492  | 2.100475  |
| 42 | 7 | 0 | 0.083175  | 1.065857  | 0.038977  |
| 43 | 6 | 0 | -0.484295 | 2.256139  | -0.495562 |
| 44 | 6 | 0 | 1.453054  | 1.345800  | 0.248633  |
| 45 | 6 | 0 | 0.533407  | 3.203011  | -0.707680 |
| 46 | 6 | 0 | -1.799527 | 2.548220  | -0.863936 |
| 47 | 6 | 0 | 1.760802  | 2.612325  | -0.234803 |
| 48 | 6 | 0 | 2.434365  | 0.588496  | 0.961594  |
| 49 | 6 | 0 | 0.249315  | 4.448838  | -1.268066 |
| 50 | 6 | 0 | -2.067892 | 3.794826  | -1.412999 |
| 51 | 1 | 0 | -2.599493 | 1.835608  | -0.725677 |
| 52 | 6 | 0 | 3.077018  | 3.123301  | -0.192650 |
| 53 | 6 | 0 | 3.764934  | 1.107960  | 0.970724  |
| 54 | 6 | 0 | 2.172594  | -0.577627 | 1.720334  |
| 55 | 6 | 0 | -1.058064 | 4.742389  | -1.616581 |
| 56 | 1 | 0 | 1.042328  | 5.173518  | -1.426195 |
| 57 | 1 | 0 | -3.089751 | 4.034593  | -1.690081 |
| 58 | 6 | 0 | 4.062496  | 2.363045  | 0.363663  |
| 59 | 1 | 0 | 3.293166  | 4.103869  | -0.605021 |
| 60 | 6 | 0 | 4.781084  | 0.384594  | 1.642316  |
| 61 | 6 | 0 | 3.173570  | -1.239347 | 2.384821  |
| 62 | 1 | 0 | 1.161239  | -0.947144 | 1.796458  |
| 63 | 1 | 0 | -1.302282 | 5.707034  | -2.049681 |
| 64 | 1 | 0 | 5.087062  | 2.721114  | 0.394763  |
| 65 | 6 | 0 | 4.501072  | -0.769193 | 2.326821  |
| 66 | 1 | 0 | 5.792962  | 0.779312  | 1.621016  |
| 67 | 1 | 0 | 2.938332  | -2.125432 | 2.965818  |
| 68 | 1 | 0 | 5.290053  | -1.305706 | 2.844092  |

-----

Step2

Method: cam-b3lyp/6-31+G(d,p) TD(NStates=3) SCRF(solvent=acetonitrile)

Excited State 1: Singlet-A 3.9297 eV 315.51 nm f=0.2312  
 <S\*\*2>=0.000  
 123 ->125 0.24281  
 124 ->125 0.62456

Step3

Method: cam-b3lyp/6-31+G(d,p)  
 SCRF(Solvent=acetonitrile,NonEquilibrium=Save)

SCF Done: E(RCAM-B3LYP) = -1393.86774954 a.u.

Step4

Method: CAM-B3LYP/6-31+G(d,p) TD(NStates=1,Root=1)  
SCRF(Solvent=acetonitrile,ExternalIteration,NonEquilibrium=Read)

After PCM corrections, the energy is -1393.72358682 a.u.

Excited State 1: Singlet-A 3.9098 eV 317.11 nm f=0.1693  
<S\*\*2>=0.000  
123 ->125 -0.21015  
124 ->125 -0.63795

Step5

Method: cam-b3lyp/6-31G(d) opt freq(savenormalmodes)  
TD(NStates=1,Root=1)

Total Energy, E(TD-HF/TD-DFT) = -1393.65661875 a.u.  
Lowest frequency = 22.3397

Standard orientation:

| Center<br>Number | Atomic<br>Number | Atomic<br>Type | Coordinates (Angstroms) |           |           |
|------------------|------------------|----------------|-------------------------|-----------|-----------|
|                  |                  |                | X                       | Y         | Z         |
| 1                | 5                | 0              | -0.555037               | -0.398303 | -0.118314 |
| 2                | 6                | 0              | -2.951798               | -1.857667 | -1.275613 |
| 3                | 1                | 0              | -2.369079               | -1.366746 | -2.062337 |
| 4                | 1                | 0              | -2.431533               | -2.793960 | -1.051888 |
| 5                | 1                | 0              | -3.934896               | -2.111295 | -1.682911 |
| 6                | 6                | 0              | -0.800267               | -3.013017 | 1.386180  |
| 7                | 1                | 0              | -0.576538               | -3.946787 | 1.910093  |
| 8                | 1                | 0              | -0.571695               | -2.178798 | 2.057718  |
| 9                | 1                | 0              | -1.881150               | -2.975593 | 1.218539  |
| 10               | 6                | 0              | 1.043122                | -0.600679 | -2.759370 |
| 11               | 1                | 0              | 0.072762                | -0.141588 | -2.973675 |
| 12               | 1                | 0              | 1.685835                | 0.186850  | -2.351864 |
| 13               | 1                | 0              | 1.482890                | -0.913969 | -3.710467 |
| 14               | 6                | 0              | 2.124093                | -5.399450 | -1.885771 |
| 15               | 1                | 0              | 3.109713                | -5.480007 | -1.410411 |
| 16               | 1                | 0              | 1.557099                | -6.291193 | -1.601366 |
| 17               | 1                | 0              | 2.285164                | -5.430306 | -2.967625 |
| 18               | 6                | 0              | 1.412754                | -4.138129 | -1.471830 |
| 19               | 6                | 0              | 0.625720                | -4.091349 | -0.323710 |
| 20               | 1                | 0              | 0.516784                | -4.993377 | 0.275629  |
| 21               | 6                | 0              | -0.014963               | -2.929292 | 0.097697  |
| 22               | 6                | 0              | 0.112300                | -1.714167 | -0.642161 |
| 23               | 6                | 0              | 0.901255                | -1.778824 | -1.826670 |
| 24               | 6                | 0              | 1.526705                | -2.963429 | -2.208519 |
| 25               | 1                | 0              | 2.110800                | -2.973024 | -3.126947 |
| 26               | 6                | 0              | -2.281674               | 0.598765  | 1.593900  |
| 27               | 6                | 0              | -3.578307               | 0.718066  | 2.089217  |
| 28               | 1                | 0              | -3.756658               | 1.379270  | 2.935208  |
| 29               | 6                | 0              | -4.648121               | 0.012473  | 1.547755  |
| 30               | 6                | 0              | -4.376673               | -0.821960 | 0.465815  |
| 31               | 1                | 0              | -5.198194               | -1.365582 | 0.002767  |
| 32               | 6                | 0              | -3.096046               | -0.970573 | -0.061048 |
| 33               | 6                | 0              | -1.992125               | -0.260021 | 0.497248  |

|    |   |   |           |           |           |
|----|---|---|-----------|-----------|-----------|
| 34 | 6 | 0 | -1.201336 | 1.390573  | 2.287435  |
| 35 | 1 | 0 | -0.873924 | 2.252327  | 1.694474  |
| 36 | 1 | 0 | -1.558121 | 1.777185  | 3.246417  |
| 37 | 1 | 0 | -0.314044 | 0.777902  | 2.478345  |
| 38 | 6 | 0 | -6.037346 | 0.128219  | 2.118329  |
| 39 | 1 | 0 | -6.799388 | 0.031700  | 1.338687  |
| 40 | 1 | 0 | -6.234555 | -0.657032 | 2.858708  |
| 41 | 1 | 0 | -6.184742 | 1.089216  | 2.620040  |
| 42 | 7 | 0 | 0.198943  | 0.921636  | -0.328230 |
| 43 | 6 | 0 | -0.339514 | 1.953215  | -1.140292 |
| 44 | 6 | 0 | 1.401984  | 1.357936  | 0.136951  |
| 45 | 6 | 0 | 0.547917  | 3.038750  | -1.193279 |
| 46 | 6 | 0 | -1.544487 | 1.967157  | -1.820300 |
| 47 | 6 | 0 | 1.682777  | 2.660187  | -0.385060 |
| 48 | 6 | 0 | 2.333712  | 0.722770  | 1.038122  |
| 49 | 6 | 0 | 0.232652  | 4.170325  | -1.929214 |
| 50 | 6 | 0 | -1.851891 | 3.113461  | -2.564652 |
| 51 | 1 | 0 | -2.229302 | 1.131222  | -1.772736 |
| 52 | 6 | 0 | 2.860833  | 3.330988  | -0.086220 |
| 53 | 6 | 0 | 3.528764  | 1.450661  | 1.333310  |
| 54 | 6 | 0 | 2.147799  | -0.523649 | 1.656550  |
| 55 | 6 | 0 | -0.983163 | 4.198332  | -2.618172 |
| 56 | 1 | 0 | 0.909346  | 5.017681  | -1.970927 |
| 57 | 1 | 0 | -2.789475 | 3.150684  | -3.109023 |
| 58 | 6 | 0 | 3.769320  | 2.725757  | 0.758349  |
| 59 | 1 | 0 | 3.059019  | 4.313405  | -0.500211 |
| 60 | 6 | 0 | 4.476409  | 0.898597  | 2.224364  |
| 61 | 6 | 0 | 3.090940  | -1.033530 | 2.532695  |
| 62 | 1 | 0 | 1.258671  | -1.093895 | 1.437645  |
| 63 | 1 | 0 | -1.249916 | 5.074249  | -3.199328 |
| 64 | 1 | 0 | 4.693907  | 3.235102  | 1.009968  |
| 65 | 6 | 0 | 4.261852  | -0.322323 | 2.822167  |
| 66 | 1 | 0 | 5.380270  | 1.462617  | 2.432983  |
| 67 | 1 | 0 | 2.918542  | -2.001474 | 2.991713  |
| 68 | 1 | 0 | 4.995807  | -0.733781 | 3.506736  |

-----

Step6

Method: cam-b3lyp/6-31+G(d,p) TD(NStates=1, Root=1)  
 SCRF(Solvent=acetonitrile,ExternalIteration,NonEquilibrium=Save)  
 After PCM corrections, the energy is -1393.76111474 a.u.

Excited State 1: Singlet-A 2.6784 eV 462.91 nm f=0.0483  
 <S\*\*2>=0.000  
 124 ->125 0.68164

Step7

Method: cam-b3lyp/6-31+G(d,p) SCRF(Solvent=acetonitrile,  
 NonEquilibrium=Read)

SCF Done: E(RCAM-B3LYP) = -1393.84947540 a.u.

Results

|                 |   |            |          |            |
|-----------------|---|------------|----------|------------|
| Absorb Energy   | = | 0.144 a.u. | 3.923 eV | 316.055 nm |
| Emission Energy | = | 0.088 a.u. | 2.404 eV | 515.652 nm |



Stokes Shift = | 0.056 a.u. | 1.518 eV | 199.597 nm

-----  
Compound 6 n-hexane

Step1

Method: cam-b3lyp/6-31G(d)

Solvent : n-Hexane

SCF Done: E(RCAM-B3LYP) = -1511.64745787 a.u.

Lowest frequency = 17.5817

Standard orientation:

-----

| Center<br>Number | Atomic<br>Number | Atomic<br>Type | Coordinates (Angstroms) |           |           |
|------------------|------------------|----------------|-------------------------|-----------|-----------|
|                  |                  |                | X                       | Y         | Z         |
| 1                | 5                | 0              | 0.529025                | 0.738154  | -0.034502 |
| 2                | 6                | 0              | 0.218641                | 2.976742  | 2.003795  |
| 3                | 1                | 0              | -0.229693               | 2.067027  | 2.414543  |
| 4                | 1                | 0              | 1.300749                | 2.886711  | 2.134833  |
| 5                | 1                | 0              | -0.124521               | 3.816735  | 2.613694  |
| 6                | 6                | 0              | 3.031145                | 2.237246  | -0.957730 |
| 7                | 1                | 0              | 4.049412                | 2.500761  | -1.256182 |
| 8                | 1                | 0              | 2.549363                | 1.764345  | -1.818642 |
| 9                | 1                | 0              | 2.486886                | 3.167087  | -0.768401 |
| 10               | 6                | 0              | 0.886473                | -0.918943 | 2.484316  |
| 11               | 1                | 0              | -0.075071               | -0.411932 | 2.374467  |
| 12               | 1                | 0              | 0.782306                | -1.905354 | 2.021585  |
| 13               | 1                | 0              | 1.056099                | -1.076561 | 3.552856  |
| 14               | 6                | 0              | 5.681088                | 0.423547  | 2.868975  |
| 15               | 1                | 0              | 6.353338                | -0.299248 | 2.392107  |
| 16               | 1                | 0              | 6.197616                | 1.388122  | 2.878061  |
| 17               | 1                | 0              | 5.537278                | 0.103585  | 3.904518  |
| 18               | 6                | 0              | 4.370766                | 0.508038  | 2.132335  |
| 19               | 6                | 0              | 4.249255                | 1.269806  | 0.972770  |
| 20               | 1                | 0              | 5.112196                | 1.825159  | 0.612122  |
| 21               | 6                | 0              | 3.053988                | 1.350352  | 0.267529  |
| 22               | 6                | 0              | 1.921291                | 0.618291  | 0.698579  |
| 23               | 6                | 0              | 2.037123                | -0.142550 | 1.882702  |
| 24               | 6                | 0              | 3.247593                | -0.175561 | 2.575988  |
| 25               | 1                | 0              | 3.309555                | -0.755946 | 3.493647  |
| 26               | 6                | 0              | -0.455037               | 2.433175  | -1.730123 |
| 27               | 6                | 0              | -0.895930               | 3.709871  | -2.071405 |
| 28               | 1                | 0              | -1.183773               | 3.909418  | -3.101031 |
| 29               | 6                | 0              | -0.989130               | 4.732026  | -1.132854 |
| 30               | 6                | 0              | -0.623646               | 4.445077  | 0.178802  |
| 31               | 1                | 0              | -0.706622               | 5.223327  | 0.933991  |
| 32               | 6                | 0              | -0.152018               | 3.189223  | 0.553533  |
| 33               | 6                | 0              | -0.060762               | 2.154160  | -0.402446 |
| 34               | 6                | 0              | -0.427361               | 1.386548  | -2.822133 |
| 35               | 1                | 0              | -1.230270               | 0.654450  | -2.691842 |
| 36               | 1                | 0              | -0.559736               | 1.853666  | -3.801537 |
| 37               | 1                | 0              | 0.510918                | 0.825024  | -2.849189 |
| 38               | 6                | 0              | -1.451326               | 6.109918  | -1.526948 |
| 39               | 1                | 0              | -1.965819               | 6.610008  | -0.701474 |
| 40               | 1                | 0              | -0.602616               | 6.742630  | -1.812304 |
| 41               | 1                | 0              | -2.132062               | 6.073662  | -2.382099 |
| 42               | 7                | 0              | -0.262823               | -0.446825 | -0.338806 |

-----

|    |   |   |           |           |           |
|----|---|---|-----------|-----------|-----------|
| 43 | 6 | 0 | -1.657943 | -0.523874 | -0.060967 |
| 44 | 6 | 0 | 0.167998  | -1.779462 | -0.535731 |
| 45 | 6 | 0 | -2.044153 | -1.870078 | 0.020581  |
| 46 | 6 | 0 | -2.597049 | 0.479498  | 0.185769  |
| 47 | 6 | 0 | -0.876131 | -2.660428 | -0.279512 |
| 48 | 6 | 0 | 1.409483  | -2.263046 | -1.053458 |
| 49 | 6 | 0 | -3.358045 | -2.222816 | 0.329184  |
| 50 | 6 | 0 | -3.898607 | 0.105965  | 0.483019  |
| 51 | 1 | 0 | -2.335879 | 1.526872  | 0.142003  |
| 52 | 6 | 0 | -0.700384 | -4.059220 | -0.356730 |
| 53 | 6 | 0 | 1.577424  | -3.680262 | -1.100457 |
| 54 | 6 | 0 | 2.438406  | -1.455386 | -1.593451 |
| 55 | 6 | 0 | -4.305000 | -1.236844 | 0.561543  |
| 56 | 1 | 0 | -3.640365 | -3.271040 | 0.386359  |
| 57 | 1 | 0 | -4.627232 | 0.891851  | 0.660243  |
| 58 | 6 | 0 | 0.516673  | -4.552766 | -0.721108 |
| 59 | 1 | 0 | -1.525667 | -4.724196 | -0.121833 |
| 60 | 6 | 0 | 2.797530  | -4.212235 | -1.583353 |
| 61 | 6 | 0 | 3.597030  | -2.003168 | -2.080409 |
| 62 | 1 | 0 | 2.304702  | -0.385279 | -1.639925 |
| 63 | 1 | 0 | 0.686869  | -5.623990 | -0.773190 |
| 64 | 6 | 0 | 3.793204  | -3.398052 | -2.054624 |
| 65 | 1 | 0 | 2.919862  | -5.291785 | -1.591623 |
| 66 | 1 | 0 | 4.364183  | -1.356400 | -2.494316 |
| 67 | 1 | 0 | 4.718740  | -3.823427 | -2.429638 |
| 68 | 6 | 0 | -5.741315 | -1.600886 | 0.890709  |
| 69 | 1 | 0 | -5.800909 | -2.696343 | 0.897783  |
| 70 | 6 | 0 | -6.150112 | -1.107201 | 2.283486  |
| 71 | 1 | 0 | -7.168914 | -1.428843 | 2.524135  |
| 72 | 1 | 0 | -5.477696 | -1.495666 | 3.054192  |
| 73 | 1 | 0 | -6.125467 | -0.013641 | 2.339015  |
| 74 | 6 | 0 | -6.716252 | -1.092137 | -0.177696 |
| 75 | 1 | 0 | -6.714022 | 0.002039  | -0.226326 |
| 76 | 1 | 0 | -6.449612 | -1.470623 | -1.168978 |
| 77 | 1 | 0 | -7.738934 | -1.412615 | 0.047640  |

-----

Step2

Method: cam-b3lyp/6-31+G(d,p) TD(NStates=3) SCRF(solvent=n-hexane)

Excited State 1: Singlet-A 3.9160 eV 316.61 nm f=0.2458  
 <S\*\*2>=0.000  
 135 ->137 0.26010  
 136 ->137 0.61597

Step3

Method: cam-b3lyp/6-31+G(d,p) SCRF(Solvent=n-hexane,NonEquilibrium=Save)  
 SCF Done: E(RCAM-B3LYP) = -1511.74110004 a.u.

Step4

Method: CAM-B3LYP/6-31+G(d,p) TD(NStates=1,Root=1)  
 SCRF(Solvent=n-hexane,ExternalIteration,NonEquilibrium=Read)

After PCM corrections, the energy is -1511.59845354 a.u.

Excited State 1: Singlet-A 3.8946 eV 318.35 nm f=0.1786  
 <S\*\*2>=0.000

135 ->137            0.22272  
 136 ->137            0.63335

Step5

Method: cam-b3lyp/6-31G(d) opt freq(savenormalmodes)  
 TD(NStates=1,Root=1)

Total Energy, E(TD-HF/TD-DFT) = -1511.52315977 a.u.  
 Lowest frequency = 17.5170

Standard orientation:

| Center<br>Number | Atomic<br>Number | Atomic<br>Type | Coordinates (Angstroms) |           |           |
|------------------|------------------|----------------|-------------------------|-----------|-----------|
|                  |                  |                | X                       | Y         | Z         |
| 1                | 5                | 0              | 0.707149                | 0.717110  | 0.060782  |
| 2                | 6                | 0              | 0.668335                | 3.424891  | 1.411965  |
| 3                | 1                | 0              | 0.212465                | 2.657623  | 2.046649  |
| 4                | 1                | 0              | 1.748771                | 3.325764  | 1.553061  |
| 5                | 1                | 0              | 0.371623                | 4.407063  | 1.791901  |
| 6                | 6                | 0              | 3.355744                | 2.038895  | -0.518411 |
| 7                | 1                | 0              | 4.420716                | 2.228401  | -0.682319 |
| 8                | 1                | 0              | 2.955861                | 1.533024  | -1.403499 |
| 9                | 1                | 0              | 2.847870                | 3.007233  | -0.476890 |
| 10               | 6                | 0              | 0.611625                | -0.825523 | 2.750002  |
| 11               | 1                | 0              | -0.228267               | -0.123340 | 2.740077  |
| 12               | 1                | 0              | 0.311663                | -1.691311 | 2.150553  |
| 13               | 1                | 0              | 0.740170                | -1.176028 | 3.778009  |
| 14               | 6                | 0              | 5.436326                | 0.135062  | 3.602410  |
| 15               | 1                | 0              | 6.024116                | -0.741309 | 3.301196  |
| 16               | 1                | 0              | 6.098857                | 1.003911  | 3.541426  |
| 17               | 1                | 0              | 5.162460                | -0.007143 | 4.652497  |
| 18               | 6                | 0              | 4.217889                | 0.309691  | 2.735226  |
| 19               | 6                | 0              | 4.256760                | 1.072452  | 1.572135  |
| 20               | 1                | 0              | 5.188944                | 1.561799  | 1.295800  |
| 21               | 6                | 0              | 3.153377                | 1.222530  | 0.737163  |
| 22               | 6                | 0              | 1.910625                | 0.588115  | 1.046326  |
| 23               | 6                | 0              | 1.878611                | -0.177329 | 2.248371  |
| 24               | 6                | 0              | 3.008319                | -0.301059 | 3.050476  |
| 25               | 1                | 0              | 2.936089                | -0.882236 | 3.968004  |
| 26               | 6                | 0              | -0.253101               | 1.996704  | -2.028687 |
| 27               | 6                | 0              | -0.684239               | 3.168056  | -2.643161 |
| 28               | 1                | 0              | -1.044207               | 3.118645  | -3.669229 |
| 29               | 6                | 0              | -0.657433               | 4.399652  | -1.996946 |
| 30               | 6                | 0              | -0.190085               | 4.418157  | -0.686393 |
| 31               | 1                | 0              | -0.183265               | 5.362169  | -0.144520 |
| 32               | 6                | 0              | 0.250652                | 3.270833  | -0.031950 |
| 33               | 6                | 0              | 0.242156                | 2.006415  | -0.694429 |
| 34               | 6                | 0              | -0.300904               | 0.731229  | -2.847929 |
| 35               | 1                | 0              | -1.120867               | 0.070931  | -2.543210 |
| 36               | 1                | 0              | -0.450667               | 0.960577  | -3.906914 |
| 37               | 1                | 0              | 0.627138                | 0.157377  | -2.757051 |
| 38               | 6                | 0              | -1.094119               | 5.662056  | -2.692171 |
| 39               | 1                | 0              | -1.504399               | 6.387782  | -1.983036 |
| 40               | 1                | 0              | -0.255270               | 6.150375  | -3.203816 |
| 41               | 1                | 0              | -1.858788               | 5.459145  | -3.448317 |
| 42               | 7                | 0              | -0.218866               | -0.512562 | -0.111140 |
| 43               | 6                | 0              | -1.574072               | -0.462949 | 0.289466  |
| 44               | 6                | 0              | 0.007811                | -1.749401 | -0.625333 |

|    |   |   |           |           |           |
|----|---|---|-----------|-----------|-----------|
| 45 | 6 | 0 | -2.201531 | -1.689515 | 0.036270  |
| 46 | 6 | 0 | -2.271587 | 0.595861  | 0.845019  |
| 47 | 6 | 0 | -1.186004 | -2.534991 | -0.546327 |
| 48 | 6 | 0 | 1.207312  | -2.312392 | -1.199759 |
| 49 | 6 | 0 | -3.540369 | -1.872250 | 0.342287  |
| 50 | 6 | 0 | -3.619270 | 0.391346  | 1.154329  |
| 51 | 1 | 0 | -1.798171 | 1.553005  | 1.017424  |
| 52 | 6 | 0 | -1.227458 | -3.849588 | -0.991000 |
| 53 | 6 | 0 | 1.119623  | -3.662396 | -1.660301 |
| 54 | 6 | 0 | 2.430443  | -1.639348 | -1.348298 |
| 55 | 6 | 0 | -4.270160 | -0.820830 | 0.913752  |
| 56 | 1 | 0 | -4.031491 | -2.820273 | 0.139991  |
| 57 | 1 | 0 | -4.175105 | 1.214075  | 1.592951  |
| 58 | 6 | 0 | -0.087363 | -4.398846 | -1.539857 |
| 59 | 1 | 0 | -2.140726 | -4.430039 | -0.915521 |
| 60 | 6 | 0 | 2.250341  | -4.270000 | -2.251346 |
| 61 | 6 | 0 | 3.518478  | -2.261766 | -1.931518 |
| 62 | 1 | 0 | 2.523111  | -0.627074 | -0.987553 |
| 63 | 1 | 0 | -0.100620 | -5.422529 | -1.900753 |
| 64 | 6 | 0 | 3.431851  | -3.582001 | -2.392455 |
| 65 | 1 | 0 | 2.165915  | -5.296857 | -2.594423 |
| 66 | 1 | 0 | 4.451907  | -1.716476 | -2.023270 |
| 67 | 1 | 0 | 4.293013  | -4.058921 | -2.848466 |
| 68 | 6 | 0 | -5.738080 | -1.003169 | 1.253154  |
| 69 | 1 | 0 | -6.005566 | -2.031688 | 0.981603  |
| 70 | 6 | 0 | -5.998378 | -0.838650 | 2.755261  |
| 71 | 1 | 0 | -7.050787 | -1.033413 | 2.985024  |
| 72 | 1 | 0 | -5.386484 | -1.529207 | 3.343060  |
| 73 | 1 | 0 | -5.768764 | 0.178891  | 3.088398  |
| 74 | 6 | 0 | -6.629286 | -0.061358 | 0.434428  |
| 75 | 1 | 0 | -6.421215 | 0.986964  | 0.672726  |
| 76 | 1 | 0 | -6.470918 | -0.197514 | -0.639399 |
| 77 | 1 | 0 | -7.685837 | -0.248522 | 0.651290  |

-----

Step6

Method: cam-b3lyp/6-31+G(d,p) TD(NStates=1, Root=1)  
 SCRF(Solvent=n-hexane,ExternalIteration,NonEquilibrium=Save)  
 After PCM corrections, the energy is -1511.62365680 a.u.

Excited State 1: Singlet-A 2.8300 eV 438.11 nm f=0.0446  
 <S\*\*2>=0.000  
 135 ->137 0.10664  
 136 ->137 0.67779

Step7

Method: cam-b3lyp/6-31+G(d,p) SCRF(Solvent=n-hexane,  
 NonEquilibrium=Read)

SCF Done: E(RCAM-B3LYP) = -1511.72625198 a.u.

Results

|                 |   |            |          |            |
|-----------------|---|------------|----------|------------|
| Absorb Energy   | = | 0.143 a.u. | 3.882 eV | 319.414 nm |
| Emission Energy | = | 0.103 a.u. | 2.792 eV | 444.108 nm |
| Stokes Shift    | = | 0.040 a.u. | 1.090 eV | 124.694 nm |

-----  
Compound 6 THF

Step1

Method: cam-b3lyp/6-31G(d)

Solvent : TetraHydroFuran

SCF Done: E(RCAM-B3LYP) = -1511.65114647 a.u.

Lowest frequency = 16.9991

Standard orientation:

-----

| Center<br>Number | Atomic<br>Number | Atomic<br>Type | Coordinates (Angstroms) |           |           |
|------------------|------------------|----------------|-------------------------|-----------|-----------|
|                  |                  |                | X                       | Y         | Z         |
| 1                | 5                | 0              | 0.528936                | 0.744052  | -0.030738 |
| 2                | 6                | 0              | 0.216938                | 2.993382  | 1.997574  |
| 3                | 1                | 0              | -0.225317               | 2.083605  | 2.414596  |
| 4                | 1                | 0              | 1.299971                | 2.910488  | 2.126077  |
| 5                | 1                | 0              | -0.128871               | 3.835177  | 2.603257  |
| 6                | 6                | 0              | 3.039053                | 2.241946  | -0.938200 |
| 7                | 1                | 0              | 4.059134                | 2.501845  | -1.232995 |
| 8                | 1                | 0              | 2.556769                | 1.775438  | -1.802170 |
| 9                | 1                | 0              | 2.499312                | 3.173719  | -0.744936 |
| 10               | 6                | 0              | 0.867241                | -0.907553 | 2.492938  |
| 11               | 1                | 0              | -0.086365               | -0.382875 | 2.396357  |
| 12               | 1                | 0              | 0.743770                | -1.885836 | 2.017861  |
| 13               | 1                | 0              | 1.041279                | -1.082199 | 3.557973  |
| 14               | 6                | 0              | 5.670167                | 0.406299  | 2.891949  |
| 15               | 1                | 0              | 6.341562                | -0.316478 | 2.413933  |
| 16               | 1                | 0              | 6.189794                | 1.369038  | 2.905518  |
| 17               | 1                | 0              | 5.521802                | 0.082326  | 3.925522  |
| 18               | 6                | 0              | 4.362502                | 0.498009  | 2.151322  |
| 19               | 6                | 0              | 4.247825                | 1.262740  | 0.992589  |
| 20               | 1                | 0              | 5.114340                | 1.814740  | 0.635623  |
| 21               | 6                | 0              | 3.054404                | 1.350640  | 0.283958  |
| 22               | 6                | 0              | 1.917168                | 0.622470  | 0.709912  |
| 23               | 6                | 0              | 2.025492                | -0.139901 | 1.894249  |
| 24               | 6                | 0              | 3.233914                | -0.180517 | 2.591225  |
| 25               | 1                | 0              | 3.289994                | -0.761225 | 3.509027  |
| 26               | 6                | 0              | -0.459913               | 2.429150  | -1.733636 |
| 27               | 6                | 0              | -0.907414               | 3.702563  | -2.079692 |
| 28               | 1                | 0              | -1.196748               | 3.896852  | -3.109862 |
| 29               | 6                | 0              | -1.004971               | 4.728315  | -1.144904 |
| 30               | 6                | 0              | -0.636067               | 4.448419  | 0.167708  |
| 31               | 1                | 0              | -0.721874               | 5.229335  | 0.919738  |
| 32               | 6                | 0              | -0.157573               | 3.196181  | 0.546843  |
| 33               | 6                | 0              | -0.063034               | 2.156986  | -0.404861 |
| 34               | 6                | 0              | -0.426453               | 1.379966  | -2.823289 |
| 35               | 1                | 0              | -1.224248               | 0.642631  | -2.690791 |
| 36               | 1                | 0              | -0.563214               | 1.844179  | -3.803339 |
| 37               | 1                | 0              | 0.515954                | 0.825476  | -2.850307 |
| 38               | 6                | 0              | -1.475048               | 6.102096  | -1.543938 |
| 39               | 1                | 0              | -1.991180               | 6.602439  | -0.719750 |
| 40               | 1                | 0              | -0.629530               | 6.737834  | -1.831856 |
| 41               | 1                | 0              | -2.155237               | 6.058639  | -2.399093 |
| 42               | 7                | 0              | -0.260061               | -0.444150 | -0.337416 |
| 43               | 6                | 0              | -1.653842               | -0.526292 | -0.057834 |
| 44               | 6                | 0              | 0.174156                | -1.773945 | -0.541503 |

-----

|    |   |   |           |           |           |
|----|---|---|-----------|-----------|-----------|
| 45 | 6 | 0 | -2.037515 | -1.874038 | 0.015398  |
| 46 | 6 | 0 | -2.594634 | 0.473597  | 0.198348  |
| 47 | 6 | 0 | -0.867666 | -2.659826 | -0.290303 |
| 48 | 6 | 0 | 1.416937  | -2.251475 | -1.062587 |
| 49 | 6 | 0 | -3.350766 | -2.231935 | 0.323445  |
| 50 | 6 | 0 | -3.895307 | 0.095665  | 0.494947  |
| 51 | 1 | 0 | -2.334802 | 1.521703  | 0.163538  |
| 52 | 6 | 0 | -0.688218 | -4.058158 | -0.375459 |
| 53 | 6 | 0 | 1.589050  | -3.668273 | -1.116907 |
| 54 | 6 | 0 | 2.443052  | -1.437767 | -1.599843 |
| 55 | 6 | 0 | -4.299306 | -1.249034 | 0.564127  |
| 56 | 1 | 0 | -3.630769 | -3.281055 | 0.374163  |
| 57 | 1 | 0 | -4.624813 | 0.878927  | 0.679876  |
| 58 | 6 | 0 | 0.530621  | -4.546400 | -0.742343 |
| 59 | 1 | 0 | -1.511445 | -4.726953 | -0.144400 |
| 60 | 6 | 0 | 2.811030  | -4.194422 | -1.602887 |
| 61 | 6 | 0 | 3.603422  | -1.979669 | -2.090505 |
| 62 | 1 | 0 | 2.305721  | -0.367934 | -1.642949 |
| 63 | 1 | 0 | 0.703870  | -5.616782 | -0.799958 |
| 64 | 6 | 0 | 3.804172  | -3.374500 | -2.070882 |
| 65 | 1 | 0 | 2.936860  | -5.273439 | -1.616474 |
| 66 | 1 | 0 | 4.367600  | -1.328891 | -2.503556 |
| 67 | 1 | 0 | 4.730746  | -3.795040 | -2.448553 |
| 68 | 6 | 0 | -5.734421 | -1.618066 | 0.893621  |
| 69 | 1 | 0 | -5.792423 | -2.713406 | 0.891243  |
| 70 | 6 | 0 | -6.140287 | -1.136583 | 2.291594  |
| 71 | 1 | 0 | -7.158160 | -1.461830 | 2.530858  |
| 72 | 1 | 0 | -5.466439 | -1.531987 | 3.057710  |
| 73 | 1 | 0 | -6.116915 | -0.043454 | 2.356386  |
| 74 | 6 | 0 | -6.712808 | -1.100745 | -0.167545 |
| 75 | 1 | 0 | -6.712396 | -0.006111 | -0.206126 |
| 76 | 1 | 0 | -6.449415 | -1.471026 | -1.162957 |
| 77 | 1 | 0 | -7.733984 | -1.425026 | 0.058642  |

-----

Step2

Method: cam-b3lyp/6-31+G(d,p) TD(NStates=3) SCRF(solvent=THF)

Excited State 1: Singlet-A 3.9147 eV 316.71 nm f=0.2503  
 <S\*\*2>=0.000  
 135 ->137 0.26730  
 136 ->137 0.61220

Step3

Method: cam-b3lyp/6-31+G(d,p) SCRF(Solvent=THF,NonEquilibrium=Save)  
 SCF Done: E(RCAM-B3LYP) = -1511.74509184 a.u.

Step4

Method: CAM-B3LYP/6-31+G(d,p) TD(NStates=1,Root=1)  
 SCRF(Solvent=THF,ExternalIteration,NonEquilibrium=Read)

After PCM corrections, the energy is -1511.60190208 a.u.

Excited State 1: Singlet-A 3.8946 eV 318.34 nm f=0.1804  
 <S\*\*2>=0.000  
 135 ->137 0.23393  
 136 ->137 0.62842

Step5

Method: cam-b3lyp/6-31G(d) opt freq(savenormalmodes)  
TD(NStates=1,Root=1)

Total Energy, E(TD-HF/TD-DFT) = -1511.52551106 a.u.  
Lowest frequency = 18.3753

Standard orientation:

| Center Number | Atomic Number | Atomic Type | Coordinates (Angstroms) |           |           |
|---------------|---------------|-------------|-------------------------|-----------|-----------|
|               |               |             | X                       | Y         | Z         |
| 1             | 5             | 0           | 0.694186                | 0.722286  | 0.058303  |
| 2             | 6             | 0           | 0.622654                | 3.422404  | 1.436193  |
| 3             | 1             | 0           | 0.179085                | 2.642275  | 2.063997  |
| 4             | 1             | 0           | 1.705494                | 3.336663  | 1.568414  |
| 5             | 1             | 0           | 0.314985                | 4.396439  | 1.827933  |
| 6             | 6             | 0           | 3.329303                | 2.078058  | -0.533173 |
| 7             | 1             | 0           | 4.390359                | 2.282116  | -0.703990 |
| 8             | 1             | 0           | 2.929746                | 1.570772  | -1.417650 |
| 9             | 1             | 0           | 2.809132                | 3.039408  | -0.479939 |
| 10            | 6             | 0           | 0.633744                | -0.824017 | 2.739032  |
| 11            | 1             | 0           | -0.212966               | -0.130108 | 2.727987  |
| 12            | 1             | 0           | 0.341630                | -1.693374 | 2.140651  |
| 13            | 1             | 0           | 0.768215                | -1.171698 | 3.767242  |
| 14            | 6             | 0           | 5.459405                | 0.171825  | 3.562856  |
| 15            | 1             | 0           | 6.082013                | -0.662518 | 3.216120  |
| 16            | 1             | 0           | 6.086191                | 1.068797  | 3.545320  |
| 17            | 1             | 0           | 5.193865                | -0.035499 | 4.603954  |
| 18            | 6             | 0           | 4.232436                | 0.339347  | 2.705812  |
| 19            | 6             | 0           | 4.256830                | 1.108275  | 1.545138  |
| 20            | 1             | 0           | 5.183054                | 1.606286  | 1.264237  |
| 21            | 6             | 0           | 3.145750                | 1.252046  | 0.718915  |
| 22            | 6             | 0           | 1.911957                | 0.604104  | 1.033052  |
| 23            | 6             | 0           | 1.892758                | -0.163999 | 2.232695  |
| 24            | 6             | 0           | 3.030098                | -0.282162 | 3.027356  |
| 25            | 1             | 0           | 2.969066                | -0.868124 | 3.942623  |
| 26            | 6             | 0           | -0.286199               | 2.010352  | -2.013367 |
| 27            | 6             | 0           | -0.741334               | 3.179929  | -2.616890 |
| 28            | 1             | 0           | -1.103631               | 3.132969  | -3.642227 |
| 29            | 6             | 0           | -0.735767               | 4.405881  | -1.959346 |
| 30            | 6             | 0           | -0.263671               | 4.421828  | -0.649256 |
| 31            | 1             | 0           | -0.272596               | 5.361095  | -0.099149 |
| 32            | 6             | 0           | 0.199906                | 3.276430  | -0.007012 |
| 33            | 6             | 0           | 0.208872                | 2.018098  | -0.679657 |
| 34            | 6             | 0           | -0.309535               | 0.750472  | -2.842120 |
| 35            | 1             | 0           | -1.112321               | 0.069109  | -2.537883 |
| 36            | 1             | 0           | -0.468988               | 0.983718  | -3.898843 |
| 37            | 1             | 0           | 0.631121                | 0.196389  | -2.756536 |
| 38            | 6             | 0           | -1.199599               | 5.666777  | -2.640272 |
| 39            | 1             | 0           | -1.664832               | 6.357249  | -1.929797 |
| 40            | 1             | 0           | -0.363870               | 6.202083  | -3.107979 |
| 41            | 1             | 0           | -1.926680               | 5.451246  | -3.428967 |
| 42            | 7             | 0           | -0.212433               | -0.508296 | -0.115096 |
| 43            | 6             | 0           | -1.571104               | -0.475206 | 0.280539  |
| 44            | 6             | 0           | 0.034175                | -1.751404 | -0.617154 |
| 45            | 6             | 0           | -2.177695               | -1.714357 | 0.037861  |
| 46            | 6             | 0           | -2.284794               | 0.574654  | 0.833239  |

|    |   |   |           |           |           |
|----|---|---|-----------|-----------|-----------|
| 47 | 6 | 0 | -1.146122 | -2.552428 | -0.530555 |
| 48 | 6 | 0 | 1.239339  | -2.296242 | -1.193714 |
| 49 | 6 | 0 | -3.513601 | -1.916154 | 0.342535  |
| 50 | 6 | 0 | -3.630759 | 0.352531  | 1.139841  |
| 51 | 1 | 0 | -1.825373 | 1.537770  | 1.010869  |
| 52 | 6 | 0 | -1.167930 | -3.872802 | -0.958917 |
| 53 | 6 | 0 | 1.173615  | -3.653960 | -1.638129 |
| 54 | 6 | 0 | 2.446727  | -1.600083 | -1.367818 |
| 55 | 6 | 0 | -4.261767 | -0.870920 | 0.903894  |
| 56 | 1 | 0 | -3.988038 | -2.873968 | 0.148420  |
| 57 | 1 | 0 | -4.199064 | 1.168663  | 1.574716  |
| 58 | 6 | 0 | -0.018732 | -4.410312 | -1.502294 |
| 59 | 1 | 0 | -2.071784 | -4.466573 | -0.877233 |
| 60 | 6 | 0 | 2.310913  | -4.246304 | -2.233653 |
| 61 | 6 | 0 | 3.539763  | -2.206157 | -1.960279 |
| 62 | 1 | 0 | 2.522279  | -0.580612 | -1.023356 |
| 63 | 1 | 0 | -0.016031 | -5.438237 | -1.850444 |
| 64 | 6 | 0 | 3.475835  | -3.535205 | -2.400076 |
| 65 | 1 | 0 | 2.243821  | -5.279097 | -2.561810 |
| 66 | 1 | 0 | 4.459479  | -1.642129 | -2.075690 |
| 67 | 1 | 0 | 4.341082  | -4.000170 | -2.860451 |
| 68 | 6 | 0 | -5.727908 | -1.074321 | 1.238702  |
| 69 | 1 | 0 | -5.976342 | -2.110080 | 0.978536  |
| 70 | 6 | 0 | -5.999073 | -0.895120 | 2.737205  |
| 71 | 1 | 0 | -7.049308 | -1.105969 | 2.962405  |
| 72 | 1 | 0 | -5.379217 | -1.568589 | 3.336557  |
| 73 | 1 | 0 | -5.789639 | 0.130501  | 3.058837  |
| 74 | 6 | 0 | -6.629600 | -0.157210 | 0.403413  |
| 75 | 1 | 0 | -6.438570 | 0.897307  | 0.628696  |
| 76 | 1 | 0 | -6.464839 | -0.306756 | -0.667789 |
| 77 | 1 | 0 | -7.683780 | -0.358596 | 0.618813  |

-----

Step6

Method: cam-b3lyp/6-31+G(d,p) TD(NStates=1, Root=1)  
 SCRF(Solvent=THF,ExternalIteration,NonEquilibrium=Save)  
 After PCM corrections, the energy is -1511.63540054 a.u.

Excited State 1: Singlet-A 2.7206 eV 455.73 nm f=0.0484  
 <S\*\*2>=0.000  
 136 ->137 0.67922

Step7

Method: cam-b3lyp/6-31+G(d,p) SCRF(Solvent=THF, NonEquilibrium=Read)

SCF Done: E(RCAM-B3LYP) = -1511.72825557 a.u.

Results

|                 |   |            |          |            |
|-----------------|---|------------|----------|------------|
| Absorb Energy   | = | 0.143 a.u. | 3.896 eV | 318.203 nm |
| Emission Energy | = | 0.093 a.u. | 2.527 eV | 490.693 nm |
| Stokes Shift    | = | 0.050 a.u. | 1.370 eV | 172.491 nm |

-----

Compound 6 ACN



Step1

Method: cam-b3lyp/6-31G(d)

Solvent : Acetonitrile

SCF Done: E(RCAM-B3LYP) = -1511.65278025 a.u.

Lowest frequency = 17.1009

Standard orientation:

| Center<br>Number | Atomic<br>Number | Atomic<br>Type | Coordinates (Angstroms) |           |           |
|------------------|------------------|----------------|-------------------------|-----------|-----------|
|                  |                  |                | X                       | Y         | Z         |
| 1                | 5                | 0              | 0.527158                | 0.747373  | -0.029435 |
| 2                | 6                | 0              | 0.213510                | 2.997446  | 1.998894  |
| 3                | 1                | 0              | -0.224474               | 2.086156  | 2.416978  |
| 4                | 1                | 0              | 1.297137                | 2.919574  | 2.125869  |
| 5                | 1                | 0              | -0.134770               | 3.838254  | 2.604430  |
| 6                | 6                | 0              | 3.038709                | 2.244588  | -0.935169 |
| 7                | 1                | 0              | 4.058927                | 2.502332  | -1.231075 |
| 8                | 1                | 0              | 2.553789                | 1.780956  | -1.799124 |
| 9                | 1                | 0              | 2.502011                | 3.177491  | -0.738680 |
| 10               | 6                | 0              | 0.861952                | -0.900785 | 2.496367  |
| 11               | 1                | 0              | -0.088947               | -0.370435 | 2.403988  |
| 12               | 1                | 0              | 0.731797                | -1.876933 | 2.018571  |
| 13               | 1                | 0              | 1.038025                | -1.079641 | 3.560301  |
| 14               | 6                | 0              | 5.669287                | 0.400886  | 2.891942  |
| 15               | 1                | 0              | 6.339459                | -0.322070 | 2.412466  |
| 16               | 1                | 0              | 6.190345                | 1.362777  | 2.905893  |
| 17               | 1                | 0              | 5.520920                | 0.075675  | 3.925074  |
| 18               | 6                | 0              | 4.361314                | 0.495526  | 2.152168  |
| 19               | 6                | 0              | 4.247387                | 1.260945  | 0.993598  |
| 20               | 1                | 0              | 5.114739                | 1.811273  | 0.636247  |
| 21               | 6                | 0              | 3.053397                | 1.351738  | 0.285833  |
| 22               | 6                | 0              | 1.915038                | 0.625666  | 0.712246  |
| 23               | 6                | 0              | 2.022265                | -0.136763 | 1.896797  |
| 24               | 6                | 0              | 3.231246                | -0.180621 | 2.592921  |
| 25               | 1                | 0              | 3.286533                | -0.761004 | 3.510960  |
| 26               | 6                | 0              | -0.466006               | 2.430361  | -1.731845 |
| 27               | 6                | 0              | -0.917310               | 3.702638  | -2.077527 |
| 28               | 1                | 0              | -1.207892               | 3.896313  | -3.107427 |
| 29               | 6                | 0              | -1.016899               | 4.728202  | -1.142481 |
| 30               | 6                | 0              | -0.645726               | 4.449270  | 0.169823  |
| 31               | 1                | 0              | -0.732887               | 5.229938  | 0.921895  |
| 32               | 6                | 0              | -0.163393               | 3.198242  | 0.548464  |
| 33               | 6                | 0              | -0.067220               | 2.159054  | -0.403279 |
| 34               | 6                | 0              | -0.430035               | 1.381858  | -2.822182 |
| 35               | 1                | 0              | -1.224690               | 0.641191  | -2.689108 |
| 36               | 1                | 0              | -0.570124               | 1.846181  | -3.801647 |
| 37               | 1                | 0              | 0.514791                | 0.831606  | -2.850988 |
| 38               | 6                | 0              | -1.491399               | 6.100642  | -1.540851 |
| 39               | 1                | 0              | -2.008098               | 6.599200  | -0.715998 |
| 40               | 1                | 0              | -0.647758               | 6.738732  | -1.829029 |
| 41               | 1                | 0              | -2.171641               | 6.055298  | -2.395811 |
| 42               | 7                | 0              | -0.259194               | -0.442801 | -0.337440 |
| 43               | 6                | 0              | -1.652568               | -0.528813 | -0.057971 |
| 44               | 6                | 0              | 0.178362                | -1.771101 | -0.543163 |
| 45               | 6                | 0              | -2.033199               | -1.877641 | 0.013062  |
| 46               | 6                | 0              | -2.595741               | 0.468466  | 0.200246  |
| 47               | 6                | 0              | -0.861201               | -2.660210 | -0.293258 |
| 48               | 6                | 0              | 1.422357                | -2.244895 | -1.064986 |

|    |   |   |           |           |           |
|----|---|---|-----------|-----------|-----------|
| 49 | 6 | 0 | -3.345901 | -2.239371 | 0.319992  |
| 50 | 6 | 0 | -3.895767 | 0.087066  | 0.495648  |
| 51 | 1 | 0 | -2.337989 | 1.517210  | 0.168764  |
| 52 | 6 | 0 | -0.677945 | -4.058177 | -0.379372 |
| 53 | 6 | 0 | 1.598767  | -3.661282 | -1.119545 |
| 54 | 6 | 0 | 2.445608  | -1.427854 | -1.603096 |
| 55 | 6 | 0 | -4.296849 | -1.258907 | 0.561920  |
| 56 | 1 | 0 | -3.623306 | -3.289205 | 0.368965  |
| 57 | 1 | 0 | -4.626917 | 0.868339  | 0.682346  |
| 58 | 6 | 0 | 0.542666  | -4.542819 | -0.745743 |
| 59 | 1 | 0 | -1.499336 | -4.729505 | -0.149271 |
| 60 | 6 | 0 | 2.822700  | -4.183674 | -1.605301 |
| 61 | 6 | 0 | 3.607924  | -1.966088 | -2.093696 |
| 62 | 1 | 0 | 2.304243  | -0.358611 | -1.648233 |
| 63 | 1 | 0 | 0.718992  | -5.612640 | -0.803588 |
| 64 | 6 | 0 | 3.813393  | -3.360439 | -2.073208 |
| 65 | 1 | 0 | 2.952063  | -5.262223 | -1.618939 |
| 66 | 1 | 0 | 4.369367  | -1.313076 | -2.508216 |
| 67 | 1 | 0 | 4.741334  | -3.777989 | -2.450712 |
| 68 | 6 | 0 | -5.731233 | -1.631781 | 0.890586  |
| 69 | 1 | 0 | -5.787387 | -2.727081 | 0.883748  |
| 70 | 6 | 0 | -6.137059 | -1.156469 | 2.290739  |
| 71 | 1 | 0 | -7.154296 | -1.484475 | 2.528757  |
| 72 | 1 | 0 | -5.462617 | -1.554504 | 3.055063  |
| 73 | 1 | 0 | -6.115430 | -0.063570 | 2.359864  |
| 74 | 6 | 0 | -6.711207 | -1.111511 | -0.167722 |
| 75 | 1 | 0 | -6.713070 | -0.016715 | -0.201333 |
| 76 | 1 | 0 | -6.448220 | -1.477461 | -1.164920 |
| 77 | 1 | 0 | -7.731405 | -1.438967 | 0.058062  |

-----

Step2

Method: cam-b3lyp/6-31+G(d,p) TD(NStates=3) SCRF(solvent=acetonitrile)

Excited State 1: Singlet-A 3.9200 eV 316.28 nm f=0.2434  
 <S\*\*2>=0.000  
 135 ->137 0.26815  
 136 ->137 0.61158

Step3

Method: cam-b3lyp/6-31+G(d,p)  
 SCRF(Solvent=acetonitrile,NonEquilibrium=Save)  
 SCF Done: E(RCAM-B3LYP) = -1511.74686954 a.u.

Step4

Method: CAM-B3LYP/6-31+G(d,p) TD(NStates=1,Root=1)  
 SCRF(Solvent=acetonitrile,ExternalIteration,NonEquilibrium=Read)

After PCM corrections, the energy is -1511.60297477 a.u.

Excited State 1: Singlet-A 3.9049 eV 317.51 nm f=0.1829  
 <S\*\*2>=0.000  
 135 ->137 0.24134  
 136 ->137 0.62483

Step5

Method: cam-b3lyp/6-31G(d) opt freq(savenormalmodes)  
TD(NStates=1,Root=1)

Total Energy, E(TD-HF/TD-DFT) = -1511.52666871 a.u.  
Lowest frequency = 19.8071

Standard orientation:

| Center<br>Number | Atomic<br>Number | Atomic<br>Type | Coordinates (Angstroms) |           |           |
|------------------|------------------|----------------|-------------------------|-----------|-----------|
|                  |                  |                | X                       | Y         | Z         |
| 1                | 5                | 0              | 0.689016                | 0.724190  | 0.058673  |
| 2                | 6                | 0              | 0.606483                | 3.419525  | 1.450323  |
| 3                | 1                | 0              | 0.165611                | 2.634547  | 2.073993  |
| 4                | 1                | 0              | 1.689977                | 3.337640  | 1.580129  |
| 5                | 1                | 0              | 0.295440                | 4.390306  | 1.847261  |
| 6                | 6                | 0              | 3.321233                | 2.092946  | -0.530232 |
| 7                | 1                | 0              | 4.381349                | 2.299765  | -0.703083 |
| 8                | 1                | 0              | 2.919958                | 1.590078  | -1.416437 |
| 9                | 1                | 0              | 2.799808                | 3.053177  | -0.468238 |
| 10               | 6                | 0              | 0.638038                | -0.830900 | 2.732257  |
| 11               | 1                | 0              | -0.210515               | -0.139255 | 2.721871  |
| 12               | 1                | 0              | 0.348483                | -1.699881 | 2.132048  |
| 13               | 1                | 0              | 0.773653                | -1.180138 | 3.759753  |
| 14               | 6                | 0              | 5.463595                | 0.171746  | 3.553062  |
| 15               | 1                | 0              | 6.087585                | -0.659250 | 3.200924  |
| 16               | 1                | 0              | 6.088282                | 1.070176  | 3.538552  |
| 17               | 1                | 0              | 5.200255                | -0.041844 | 4.593396  |
| 18               | 6                | 0              | 4.234771                | 0.340265  | 2.698721  |
| 19               | 6                | 0              | 4.255461                | 1.114823  | 1.541321  |
| 20               | 1                | 0              | 5.180068                | 1.616181  | 1.261166  |
| 21               | 6                | 0              | 3.142479                | 1.259327  | 0.717490  |
| 22               | 6                | 0              | 1.911190                | 0.606303  | 1.030067  |
| 23               | 6                | 0              | 1.895039                | -0.166271 | 2.226834  |
| 24               | 6                | 0              | 3.034254                | -0.285420 | 3.019500  |
| 25               | 1                | 0              | 2.975974                | -0.875556 | 3.932240  |
| 26               | 6                | 0              | -0.293738               | 2.019849  | -2.006279 |
| 27               | 6                | 0              | -0.754474               | 3.190280  | -2.604892 |
| 28               | 1                | 0              | -1.115685               | 3.146371  | -3.630722 |
| 29               | 6                | 0              | -0.756030               | 4.413136  | -1.941247 |
| 30               | 6                | 0              | -0.285053               | 4.425389  | -0.630340 |
| 31               | 1                | 0              | -0.299513               | 5.361948  | -0.075811 |
| 32               | 6                | 0              | 0.183865                | 3.279019  | 0.006589  |
| 33               | 6                | 0              | 0.198755                | 2.024061  | -0.671619 |
| 34               | 6                | 0              | -0.309062               | 0.763524  | -2.840629 |
| 35               | 1                | 0              | -1.106036               | 0.074676  | -2.537977 |
| 36               | 1                | 0              | -0.471805               | 1.000081  | -3.896078 |
| 37               | 1                | 0              | 0.635572                | 0.215722  | -2.757911 |
| 38               | 6                | 0              | -1.226244               | 5.674903  | -2.616353 |
| 39               | 1                | 0              | -1.696035               | 6.359048  | -1.902852 |
| 40               | 1                | 0              | -0.392897               | 6.217311  | -3.080058 |
| 41               | 1                | 0              | -1.950711               | 5.459183  | -3.407313 |
| 42               | 7                | 0              | -0.211456               | -0.505450 | -0.118668 |
| 43               | 6                | 0              | -1.571799               | -0.478277 | 0.273924  |
| 44               | 6                | 0              | 0.042136                | -1.750042 | -0.617869 |
| 45               | 6                | 0              | -2.171348               | -1.721091 | 0.032346  |
| 46               | 6                | 0              | -2.290797               | 0.567399  | 0.827897  |
| 47               | 6                | 0              | -1.133857               | -2.556184 | -0.530820 |
| 48               | 6                | 0              | 1.249523                | -2.288138 | -1.194926 |
| 49               | 6                | 0              | -3.506444               | -1.929649 | 0.335620  |

|    |   |   |           |           |           |
|----|---|---|-----------|-----------|-----------|
| 50 | 6 | 0 | -3.636332 | 0.339102  | 1.132484  |
| 51 | 1 | 0 | -1.835655 | 1.531705  | 1.010467  |
| 52 | 6 | 0 | -1.148423 | -3.878150 | -0.954033 |
| 53 | 6 | 0 | 1.192118  | -3.648556 | -1.633610 |
| 54 | 6 | 0 | 2.450811  | -1.583474 | -1.378486 |
| 55 | 6 | 0 | -4.260804 | -0.887501 | 0.895216  |
| 56 | 1 | 0 | -3.975236 | -2.890322 | 0.142577  |
| 57 | 1 | 0 | -4.208636 | 1.152067  | 1.568035  |
| 58 | 6 | 0 | 0.004741  | -4.411709 | -1.493830 |
| 59 | 1 | 0 | -2.049170 | -4.476347 | -0.871734 |
| 60 | 6 | 0 | 2.332252  | -4.235415 | -2.229652 |
| 61 | 6 | 0 | 3.546082  | -2.183729 | -1.973592 |
| 62 | 1 | 0 | 2.519378  | -0.561052 | -1.041146 |
| 63 | 1 | 0 | 0.013312  | -5.440947 | -1.837686 |
| 64 | 6 | 0 | 3.491132  | -3.516040 | -2.404763 |
| 65 | 1 | 0 | 2.271867  | -5.270327 | -2.552160 |
| 66 | 1 | 0 | 4.460386  | -1.612753 | -2.098060 |
| 67 | 1 | 0 | 4.358120  | -3.976787 | -2.866016 |
| 68 | 6 | 0 | -5.726024 | -1.098915 | 1.229006  |
| 69 | 1 | 0 | -5.969738 | -2.134470 | 0.964402  |
| 70 | 6 | 0 | -5.997543 | -0.927188 | 2.728364  |
| 71 | 1 | 0 | -7.046972 | -1.143244 | 2.952287  |
| 72 | 1 | 0 | -5.375326 | -1.601443 | 3.324443  |
| 73 | 1 | 0 | -5.791986 | 0.097863  | 3.054402  |
| 74 | 6 | 0 | -6.631965 | -0.182088 | 0.398026  |
| 75 | 1 | 0 | -6.446613 | 0.872302  | 0.628797  |
| 76 | 1 | 0 | -6.466597 | -0.326172 | -0.673881 |
| 77 | 1 | 0 | -7.684978 | -0.390316 | 0.612466  |

-----

Step6

Method: cam-b3lyp/6-31+G(d,p) TD(NStates=1, Root=1)  
 SCRF(Solvent=acetonitrile,ExternalIteration,NonEquilibrium=Save)  
 After PCM corrections, the energy is -1511.64014217 a.u.

Excited State 1: Singlet-A 2.6778 eV 463.01 nm f=0.0498  
 <S\*\*2>=0.000  
 136 ->137 0.67998

Step7

Method: cam-b3lyp/6-31+G(d,p) SCRF(Solvent=acetonitrile,  
 NonEquilibrium=Read)

SCF Done: E(RCAM-B3LYP) = -1511.72876162 a.u.

Results

|                 |   |            |          |            |
|-----------------|---|------------|----------|------------|
| -----           |   |            |          |            |
| Absorb Energy   | = | 0.144 a.u. | 3.916 eV | 316.644 nm |
| -----           |   |            |          |            |
| Emission Energy | = | 0.089 a.u. | 2.411 eV | 514.146 nm |
| -----           |   |            |          |            |
| Stokes Shift    | = | 0.055 a.u. | 1.504 eV | 197.503 nm |
| -----           |   |            |          |            |

Compound 7 n-hexane

Step1

Method: cam-b3lyp/6-31G(d)  
 Solvent : n-Hexane  
 SCF Done: E(RCAM-B3LYP) = -1508.25482631 a.u.  
 Lowest frequency = 19.6136

Standard orientation:

| Center<br>Number | Atomic<br>Number | Atomic<br>Type | Coordinates (Angstroms) |           |           |
|------------------|------------------|----------------|-------------------------|-----------|-----------|
|                  |                  |                | X                       | Y         | Z         |
| 1                | 6                | 0              | -2.437739               | -1.600627 | 0.146264  |
| 2                | 6                | 0              | -1.371440               | -2.506466 | -0.199164 |
| 3                | 6                | 0              | -0.250804               | -1.738318 | -0.495906 |
| 4                | 7                | 0              | -0.531290               | -0.370496 | -0.282179 |
| 5                | 6                | 0              | -1.917238               | -0.304319 | 0.050539  |
| 6                | 6                | 0              | -2.737865               | 0.791020  | 0.338441  |
| 7                | 6                | 0              | -4.054527               | 0.558250  | 0.687282  |
| 8                | 6                | 0              | -4.577237               | -0.742891 | 0.774138  |
| 9                | 6                | 0              | -3.768664               | -1.835381 | 0.506357  |
| 10               | 6                | 0              | -1.346670               | -3.915922 | -0.281724 |
| 11               | 6                | 0              | -0.203203               | -4.533687 | -0.691138 |
| 12               | 6                | 0              | 0.928187                | -3.776078 | -1.112054 |
| 13               | 6                | 0              | 0.911904                | -2.349221 | -1.061403 |
| 14               | 8                | 0              | -5.890237               | -0.819103 | 1.130225  |
| 15               | 6                | 0              | -6.469582               | -2.101059 | 1.237669  |
| 16               | 6                | 0              | 2.066145                | -4.432347 | -1.640073 |
| 17               | 6                | 0              | 3.123198                | -3.726369 | -2.150837 |
| 18               | 6                | 0              | 3.073246                | -2.318742 | -2.173012 |
| 19               | 6                | 0              | 1.997747                | -1.653262 | -1.643553 |
| 20               | 1                | 0              | -2.372143               | 1.806180  | 0.287167  |
| 21               | 1                | 0              | -4.719168               | 1.387518  | 0.903592  |
| 22               | 1                | 0              | -4.141769               | -2.850210 | 0.568796  |
| 23               | 1                | 0              | -2.227517               | -4.491682 | -0.014670 |
| 24               | 1                | 0              | -0.148350               | -5.616685 | -0.748166 |
| 25               | 1                | 0              | -7.508465               | -1.942343 | 1.528139  |
| 26               | 1                | 0              | -5.968805               | -2.706107 | 2.003288  |
| 27               | 1                | 0              | -6.439638               | -2.637541 | 0.281492  |
| 28               | 1                | 0              | 2.073910                | -5.518766 | -1.650768 |
| 29               | 1                | 0              | 3.983889                | -4.245976 | -2.560004 |
| 30               | 1                | 0              | 3.887102                | -1.755251 | -2.618251 |
| 31               | 1                | 0              | 1.974352                | -0.575088 | -1.689240 |
| 32               | 5                | 0              | 0.389779                | 0.724626  | -0.011708 |
| 33               | 6                | 0              | -0.070219               | 2.196435  | -0.344700 |
| 34               | 6                | 0              | -0.008861               | 3.227198  | 0.618098  |
| 35               | 6                | 0              | -0.490994               | 2.526780  | -1.652470 |
| 36               | 6                | 0              | -0.362570               | 4.528772  | 0.269829  |
| 37               | 6                | 0              | -0.810567               | 3.845248  | -1.968536 |
| 38               | 6                | 0              | -0.760835               | 4.862280  | -1.020892 |
| 39               | 1                | 0              | -0.321897               | 5.306530  | 1.028984  |
| 40               | 1                | 0              | -1.113709               | 4.084049  | -2.985322 |
| 41               | 6                | 0              | 1.795680                | 0.460305  | 0.654366  |
| 42               | 6                | 0              | 1.888409                | -0.313062 | 1.832388  |
| 43               | 6                | 0              | 2.974621                | 1.077095  | 0.171241  |
| 44               | 6                | 0              | 3.119507                | -0.468270 | 2.470320  |
| 45               | 6                | 0              | 4.186547                | 0.876996  | 0.822481  |
| 46               | 6                | 0              | 4.283711                | 0.103455  | 1.976421  |
| 47               | 1                | 0              | 3.165113                | -1.055508 | 3.384604  |
| 48               | 1                | 0              | 5.083199                | 1.345338  | 0.422748  |
| 49               | 6                | 0              | 2.984187                | 1.963506  | -1.054488 |

|    |   |   |           |           |           |
|----|---|---|-----------|-----------|-----------|
| 50 | 1 | 0 | 2.417051  | 1.542388  | -1.890004 |
| 51 | 1 | 0 | 2.546376  | 2.943589  | -0.843572 |
| 52 | 1 | 0 | 4.008681  | 2.122929  | -1.401483 |
| 53 | 6 | 0 | 0.694204  | -0.974958 | 2.483917  |
| 54 | 1 | 0 | -0.215905 | -0.373881 | 2.418828  |
| 55 | 1 | 0 | 0.471233  | -1.942673 | 2.023613  |
| 56 | 1 | 0 | 0.894929  | -1.156315 | 3.543269  |
| 57 | 6 | 0 | 5.610783  | -0.113659 | 2.653588  |
| 58 | 1 | 0 | 5.482972  | -0.391965 | 3.703233  |
| 59 | 1 | 0 | 6.172438  | -0.919466 | 2.166674  |
| 60 | 1 | 0 | 6.232897  | 0.785405  | 2.611752  |
| 61 | 6 | 0 | 0.410934  | 2.967560  | 2.047183  |
| 62 | 1 | 0 | -0.098341 | 2.098891  | 2.475157  |
| 63 | 1 | 0 | 1.485359  | 2.777781  | 2.124240  |
| 64 | 1 | 0 | 0.176441  | 3.829581  | 2.677478  |
| 65 | 6 | 0 | -0.613283 | 1.493147  | -2.750333 |
| 66 | 1 | 0 | 0.264652  | 0.844656  | -2.823302 |
| 67 | 1 | 0 | -1.476015 | 0.839945  | -2.587243 |
| 68 | 1 | 0 | -0.744308 | 1.980312  | -3.720104 |
| 69 | 6 | 0 | -1.153632 | 6.272740  | -1.372933 |
| 70 | 1 | 0 | -2.225783 | 6.434542  | -1.210668 |
| 71 | 1 | 0 | -0.618131 | 7.001843  | -0.758303 |
| 72 | 1 | 0 | -0.947096 | 6.494259  | -2.423813 |

-----

Step2

Method: cam-b3lyp/6-31+G(d,p) TD(NStates=3) SCRF(solvent=n-hexane)

Excited State 1: Singlet-A 3.9006 eV 317.86 nm f=0.2557  
 <S\*\*2>=0.000  
 131 ->133 -0.40351  
 132 ->133 0.51499

Step3

Method: cam-b3lyp/6-31+G(d,p) SCRF(Solvent=n-hexane,NonEquilibrium=Save)  
 SCF Done: E(RCAM-B3LYP) = -1508.34530902 a.u.

Step4

Method: CAM-B3LYP/6-31+G(d,p) TD(NStates=1,Root=1)  
 SCRF(Solvent=n-hexane,ExternalIteration,NonEquilibrium=Read)

After PCM corrections, the energy is -1508.20275922 a.u.

Excited State 1: Singlet-A 3.8883 eV 318.87 nm f=0.1873  
 <S\*\*2>=0.000  
 128 ->133 0.10169  
 131 ->133 -0.42882  
 132 ->133 0.49434

Step5

Method: cam-b3lyp/6-31G(d) opt freq(savenormalmodes)  
 TD(NStates=1,Root=1)

Total Energy, E(TD-HF/TD-DFT) = -1508.13157621 a.u.  
 Lowest frequency = 23.6117

## Standard orientation:

| Center<br>Number | Atomic<br>Number | Atomic<br>Type | Coordinates (Angstroms) |           |           |
|------------------|------------------|----------------|-------------------------|-----------|-----------|
|                  |                  |                | X                       | Y         | Z         |
| 1                | 6                | 0              | -2.626360               | -1.189530 | 0.331856  |
| 2                | 6                | 0              | -1.842723               | -2.206573 | -0.349577 |
| 3                | 6                | 0              | -0.569164               | -1.661955 | -0.558137 |
| 4                | 7                | 0              | -0.517562               | -0.364160 | -0.017799 |
| 5                | 6                | 0              | -1.753092               | -0.087764 | 0.502338  |
| 6                | 6                | 0              | -2.197127               | 1.090430  | 1.130835  |
| 7                | 6                | 0              | -3.497453               | 1.135802  | 1.583181  |
| 8                | 6                | 0              | -4.363704               | 0.040307  | 1.413661  |
| 9                | 6                | 0              | -3.927071               | -1.140824 | 0.775967  |
| 10               | 6                | 0              | -2.176289               | -3.490835 | -0.779832 |
| 11               | 6                | 0              | -1.223542               | -4.230416 | -1.441683 |
| 12               | 6                | 0              | 0.072140                | -3.716885 | -1.684579 |
| 13               | 6                | 0              | 0.443238                | -2.406509 | -1.235086 |
| 14               | 8                | 0              | -5.605883               | 0.210838  | 1.888882  |
| 15               | 6                | 0              | -6.555094               | -0.837444 | 1.756310  |
| 16               | 6                | 0              | 1.023026                | -4.500756 | -2.389256 |
| 17               | 6                | 0              | 2.278713                | -4.025167 | -2.646536 |
| 18               | 6                | 0              | 2.645312                | -2.740129 | -2.194069 |
| 19               | 6                | 0              | 1.756528                | -1.954311 | -1.505225 |
| 20               | 1                | 0              | -1.539166               | 1.941469  | 1.235921  |
| 21               | 1                | 0              | -3.890293               | 2.019662  | 2.071201  |
| 22               | 1                | 0              | -4.594749               | -1.981784 | 0.638401  |
| 23               | 1                | 0              | -3.168184               | -3.894395 | -0.602952 |
| 24               | 1                | 0              | -1.457611               | -5.229337 | -1.796243 |
| 25               | 1                | 0              | -7.471904               | -0.464724 | 2.210415  |
| 26               | 1                | 0              | -6.225065               | -1.737035 | 2.285247  |
| 27               | 1                | 0              | -6.738179               | -1.071925 | 0.702987  |
| 28               | 1                | 0              | 0.727528                | -5.491597 | -2.721735 |
| 29               | 1                | 0              | 2.996248                | -4.634377 | -3.186671 |
| 30               | 1                | 0              | 3.648033                | -2.369825 | -2.381098 |
| 31               | 1                | 0              | 2.062331                | -0.984672 | -1.144204 |
| 32               | 5                | 0              | 0.637337                | 0.664608  | 0.088463  |
| 33               | 6                | 0              | 0.357749                | 2.027707  | -0.623421 |
| 34               | 6                | 0              | 0.645872                | 3.260790  | 0.036630  |
| 35               | 6                | 0              | -0.241187               | 2.125282  | -1.911525 |
| 36               | 6                | 0              | 0.348727                | 4.476991  | -0.571854 |
| 37               | 6                | 0              | -0.521557               | 3.363595  | -2.480424 |
| 38               | 6                | 0              | -0.237674               | 4.560911  | -1.831626 |
| 39               | 1                | 0              | 0.572199                | 5.396616  | -0.034106 |
| 40               | 1                | 0              | -0.962803               | 3.394770  | -3.475027 |
| 41               | 6                | 0              | 1.880658                | 0.287222  | 0.954737  |
| 42               | 6                | 0              | 1.820317                | -0.493938 | 2.144966  |
| 43               | 6                | 0              | 3.183783                | 0.700542  | 0.538536  |
| 44               | 6                | 0              | 2.976074                | -0.827321 | 2.844025  |
| 45               | 6                | 0              | 4.311699                | 0.345095  | 1.272671  |
| 46               | 6                | 0              | 4.240847                | -0.423189 | 2.430402  |
| 47               | 1                | 0              | 2.883309                | -1.412845 | 3.756858  |
| 48               | 1                | 0              | 5.287659                | 0.670311  | 0.917090  |
| 49               | 6                | 0              | 3.419423                | 1.488980  | -0.729255 |
| 50               | 1                | 0              | 2.863061                | 1.074858  | -1.576535 |
| 51               | 1                | 0              | 3.098364                | 2.531521  | -0.644500 |
| 52               | 1                | 0              | 4.483201                | 1.488685  | -0.984781 |
| 53               | 6                | 0              | 0.509874                | -0.943388 | 2.741517  |
| 54               | 1                | 0              | -0.193426               | -0.109526 | 2.840267  |
| 55               | 1                | 0              | 0.015314                | -1.712216 | 2.138451  |

|    |   |   |           |           |           |
|----|---|---|-----------|-----------|-----------|
| 56 | 1 | 0 | 0.665848  | -1.367054 | 3.737594  |
| 57 | 6 | 0 | 5.480507  | -0.822678 | 3.186009  |
| 58 | 1 | 0 | 5.271344  | -0.962569 | 4.251114  |
| 59 | 1 | 0 | 5.894324  | -1.767446 | 2.811479  |
| 60 | 1 | 0 | 6.266917  | -0.067314 | 3.093086  |
| 61 | 6 | 0 | 1.222008  | 3.313410  | 1.432025  |
| 62 | 1 | 0 | 0.698446  | 2.628974  | 2.108385  |
| 63 | 1 | 0 | 2.274986  | 3.018331  | 1.466827  |
| 64 | 1 | 0 | 1.145729  | 4.326065  | 1.839035  |
| 65 | 6 | 0 | -0.548727 | 0.899821  | -2.735009 |
| 66 | 1 | 0 | 0.286005  | 0.191273  | -2.729825 |
| 67 | 1 | 0 | -1.428759 | 0.359602  | -2.368001 |
| 68 | 1 | 0 | -0.750647 | 1.171931  | -3.775065 |
| 69 | 6 | 0 | -0.574614 | 5.890842  | -2.452538 |
| 70 | 1 | 0 | -1.564414 | 6.244494  | -2.137220 |
| 71 | 1 | 0 | 0.148036  | 6.661354  | -2.166354 |
| 72 | 1 | 0 | -0.587068 | 5.829379  | -3.545032 |

Step6

Method: cam-b3lyp/6-31+G(d,p) TD(NStates=1, Root=1)  
 SCRF(Solvent=n-hexane,ExternalIteration,NonEquilibrium=Save)  
 After PCM corrections, the energy is -1508.22900206 a.u.

Excited State 1: Singlet-A 2.7954 eV 443.53 nm f=0.0337  
 <S\*\*2>=0.000  
 132 ->133 0.68131

Step7

Method: cam-b3lyp/6-31+G(d,p) SCRF(Solvent=n-hexane,  
 NonEquilibrium=Read)

SCF Done: E(RCAM-B3LYP) = -1508.33015391 a.u.

Results

|                 |   |            |          |            |
|-----------------|---|------------|----------|------------|
| Absorb Energy   | = | 0.143 a.u. | 3.879 eV | 319.631 nm |
| Emission Energy | = | 0.101 a.u. | 2.752 eV | 450.445 nm |
| Stokes Shift    | = | 0.041 a.u. | 1.126 eV | 130.814 nm |

Compound 7 THF

Step1

Method: cam-b3lyp/6-31G(d)  
 Solvent : TetraHydroFuran  
 SCF Done: E(RCAM-B3LYP) = -1508.25929561 a.u.  
 Lowest frequency = 19.5822

Standard orientation:

| Center Number | Atomic Number | Atomic Type | Coordinates (Angstroms) |           |          |
|---------------|---------------|-------------|-------------------------|-----------|----------|
|               |               |             | X                       | Y         | Z        |
| 1             | 6             | 0           | -2.433214               | -1.605468 | 0.145619 |



|    |   |   |           |           |           |
|----|---|---|-----------|-----------|-----------|
| 2  | 6 | 0 | -1.365487 | -2.508094 | -0.204445 |
| 3  | 6 | 0 | -0.246494 | -1.736065 | -0.498698 |
| 4  | 7 | 0 | -0.529283 | -0.369834 | -0.280025 |
| 5  | 6 | 0 | -1.914322 | -0.307619 | 0.055186  |
| 6  | 6 | 0 | -2.736421 | 0.784821  | 0.350216  |
| 7  | 6 | 0 | -4.052675 | 0.548004  | 0.699504  |
| 8  | 6 | 0 | -4.573733 | -0.754817 | 0.780127  |
| 9  | 6 | 0 | -3.763497 | -1.844930 | 0.505985  |
| 10 | 6 | 0 | -1.338487 | -3.917676 | -0.291680 |
| 11 | 6 | 0 | -0.193492 | -4.531883 | -0.703263 |
| 12 | 6 | 0 | 0.936503  | -3.770035 | -1.121891 |
| 13 | 6 | 0 | 0.917322  | -2.343043 | -1.066911 |
| 14 | 8 | 0 | -5.885985 | -0.835617 | 1.137217  |
| 15 | 6 | 0 | -6.463481 | -2.122373 | 1.240519  |
| 16 | 6 | 0 | 2.076038  | -4.422633 | -1.652409 |
| 17 | 6 | 0 | 3.131467  | -3.712487 | -2.161990 |
| 18 | 6 | 0 | 3.078238  | -2.304440 | -2.180655 |
| 19 | 6 | 0 | 2.001346  | -1.642773 | -1.648078 |
| 20 | 1 | 0 | -2.372166 | 1.800830  | 0.305490  |
| 21 | 1 | 0 | -4.716721 | 1.376508  | 0.921349  |
| 22 | 1 | 0 | -4.134730 | -2.860625 | 0.564260  |
| 23 | 1 | 0 | -2.218069 | -4.496020 | -0.026361 |
| 24 | 1 | 0 | -0.136416 | -5.614499 | -0.763503 |
| 25 | 1 | 0 | -7.502029 | -1.967023 | 1.533022  |
| 26 | 1 | 0 | -5.959345 | -2.727784 | 2.002713  |
| 27 | 1 | 0 | -6.432783 | -2.653402 | 0.282060  |
| 28 | 1 | 0 | 2.086376  | -5.508922 | -1.666231 |
| 29 | 1 | 0 | 3.992994  | -4.228838 | -2.573302 |
| 30 | 1 | 0 | 3.889776  | -1.738171 | -2.626538 |
| 31 | 1 | 0 | 1.975088  | -0.564594 | -1.692270 |
| 32 | 5 | 0 | 0.389930  | 0.728489  | -0.009259 |
| 33 | 6 | 0 | -0.073525 | 2.198008  | -0.346358 |
| 34 | 6 | 0 | -0.014460 | 3.232291  | 0.613216  |
| 35 | 6 | 0 | -0.497285 | 2.523322  | -1.654886 |
| 36 | 6 | 0 | -0.374310 | 4.531685  | 0.261919  |
| 37 | 6 | 0 | -0.822869 | 3.839794  | -1.974314 |
| 38 | 6 | 0 | -0.776325 | 4.860042  | -1.029332 |
| 39 | 1 | 0 | -0.335491 | 5.311783  | 1.018697  |
| 40 | 1 | 0 | -1.127591 | 4.074713  | -2.991487 |
| 41 | 6 | 0 | 1.794269  | 0.464967  | 0.660999  |
| 42 | 6 | 0 | 1.884303  | -0.308257 | 1.839829  |
| 43 | 6 | 0 | 2.975123  | 1.079928  | 0.179586  |
| 44 | 6 | 0 | 3.114716  | -0.467062 | 2.478923  |
| 45 | 6 | 0 | 4.186582  | 0.876364  | 0.831774  |
| 46 | 6 | 0 | 4.281376  | 0.101708  | 1.985623  |
| 47 | 1 | 0 | 3.157972  | -1.053369 | 3.393897  |
| 48 | 1 | 0 | 5.084503  | 1.342992  | 0.433111  |
| 49 | 6 | 0 | 2.988381  | 1.969330  | -1.043979 |
| 50 | 1 | 0 | 2.419256  | 1.553736  | -1.880695 |
| 51 | 1 | 0 | 2.555233  | 2.950612  | -0.828597 |
| 52 | 1 | 0 | 4.013397  | 2.125629  | -1.390329 |
| 53 | 6 | 0 | 0.687588  | -0.965195 | 2.492254  |
| 54 | 1 | 0 | -0.218232 | -0.357122 | 2.431911  |
| 55 | 1 | 0 | 0.456591  | -1.929814 | 2.029319  |
| 56 | 1 | 0 | 0.890175  | -1.151827 | 3.550207  |
| 57 | 6 | 0 | 5.607391  | -0.118343 | 2.664029  |
| 58 | 1 | 0 | 5.477827  | -0.397112 | 3.713254  |
| 59 | 1 | 0 | 6.167702  | -0.924970 | 2.176989  |
| 60 | 1 | 0 | 6.231357  | 0.779289  | 2.621923  |
| 61 | 6 | 0 | 0.410260  | 2.980342  | 2.042320  |

|    |   |   |           |          |           |
|----|---|---|-----------|----------|-----------|
| 62 | 1 | 0 | -0.091195 | 2.109479 | 2.474853  |
| 63 | 1 | 0 | 1.486471  | 2.799303 | 2.116685  |
| 64 | 1 | 0 | 0.171741  | 3.843103 | 2.669888  |
| 65 | 6 | 0 | -0.614371 | 1.487602 | -2.751609 |
| 66 | 1 | 0 | 0.269979  | 0.848267 | -2.828016 |
| 67 | 1 | 0 | -1.470142 | 0.826141 | -2.585092 |
| 68 | 1 | 0 | -0.753937 | 1.973160 | -3.720856 |
| 69 | 6 | 0 | -1.175213 | 6.267895 | -1.384931 |
| 70 | 1 | 0 | -2.247905 | 6.424996 | -1.221865 |
| 71 | 1 | 0 | -0.642695 | 7.000617 | -0.772169 |
| 72 | 1 | 0 | -0.971215 | 6.486799 | -2.436777 |

-----

Step2

Method: cam-b3lyp/6-31+G(d,p) TD(NStates=3) SCRF(solvent=THF)

Excited State 1: Singlet-A 3.8994 eV 317.95 nm f=0.2608  
 <S\*\*2>=0.000  
 131 ->133 -0.36025  
 132 ->133 0.54664

Step3

Method: cam-b3lyp/6-31+G(d,p) SCRF(Solvent=THF,NonEquilibrium=Save)  
 SCF Done: E(RCAM-B3LYP) = -1508.35024421 a.u.

Step4

Method: CAM-B3LYP/6-31+G(d,p) TD(NStates=1,Root=1)  
 SCRF(Solvent=THF,ExternalIteration,NonEquilibrium=Read)

After PCM corrections, the energy is -1508.20728418 a.u.

Excited State 1: Singlet-A 3.8879 eV 318.90 nm f=0.1898  
 <S\*\*2>=0.000  
 131 ->133 -0.37292  
 132 ->133 0.53846

Step5

Method: cam-b3lyp/6-31G(d) opt freq(savenormalmodes)  
 TD(NStates=1,Root=1)

Total Energy, E(TD-HF/TD-DFT) = -1508.13479607 a.u.  
 Lowest frequency = 23.9302

Standard orientation:

| Center Number | Atomic Number | Atomic Type | Coordinates (Angstroms) |           |           |
|---------------|---------------|-------------|-------------------------|-----------|-----------|
|               |               |             | X                       | Y         | Z         |
| 1             | 6             | 0           | -2.610610               | -1.224847 | 0.325712  |
| 2             | 6             | 0           | -1.804509               | -2.232914 | -0.344909 |
| 3             | 6             | 0           | -0.538150               | -1.666838 | -0.552362 |
| 4             | 7             | 0           | -0.510263               | -0.368497 | -0.017692 |
| 5             | 6             | 0           | -1.759689               | -0.109863 | 0.498157  |
| 6             | 6             | 0           | -2.223244               | 1.056393  | 1.128208  |
| 7             | 6             | 0           | -3.529750               | 1.081458  | 1.570517  |
| 8             | 6             | 0           | -4.378018               | -0.025536 | 1.392676  |

|    |   |   |           |           |           |
|----|---|---|-----------|-----------|-----------|
| 9  | 6 | 0 | -3.915959 | -1.199524 | 0.759728  |
| 10 | 6 | 0 | -2.113332 | -3.525058 | -0.765942 |
| 11 | 6 | 0 | -1.144030 | -4.252749 | -1.420105 |
| 12 | 6 | 0 | 0.140865  | -3.715940 | -1.669247 |
| 13 | 6 | 0 | 0.486773  | -2.394465 | -1.230861 |
| 14 | 8 | 0 | -5.626468 | 0.124259  | 1.857749  |
| 15 | 6 | 0 | -6.557231 | -0.943482 | 1.718450  |
| 16 | 6 | 0 | 1.104305  | -4.485789 | -2.372712 |
| 17 | 6 | 0 | 2.348203  | -3.985175 | -2.644394 |
| 18 | 6 | 0 | 2.688098  | -2.687518 | -2.208631 |
| 19 | 6 | 0 | 1.786354  | -1.915756 | -1.517717 |
| 20 | 1 | 0 | -1.578163 | 1.915439  | 1.249893  |
| 21 | 1 | 0 | -3.936258 | 1.958084  | 2.060681  |
| 22 | 1 | 0 | -4.566681 | -2.052908 | 0.618540  |
| 23 | 1 | 0 | -3.097972 | -3.945010 | -0.588872 |
| 24 | 1 | 0 | -1.359253 | -5.258796 | -1.765919 |
| 25 | 1 | 0 | -7.483549 | -0.586982 | 2.165805  |
| 26 | 1 | 0 | -6.213544 | -1.835593 | 2.250211  |
| 27 | 1 | 0 | -6.727294 | -1.180451 | 0.664063  |
| 28 | 1 | 0 | 0.827956  | -5.485514 | -2.694360 |
| 29 | 1 | 0 | 3.074960  | -4.583364 | -3.184258 |
| 30 | 1 | 0 | 3.679450  | -2.295058 | -2.411135 |
| 31 | 1 | 0 | 2.071534  | -0.933869 | -1.173008 |
| 32 | 5 | 0 | 0.621092  | 0.670592  | 0.088605  |
| 33 | 6 | 0 | 0.323017  | 2.040261  | -0.609715 |
| 34 | 6 | 0 | 0.598985  | 3.272459  | 0.056172  |
| 35 | 6 | 0 | -0.278403 | 2.137389  | -1.896719 |
| 36 | 6 | 0 | 0.286655  | 4.489206  | -0.544471 |
| 37 | 6 | 0 | -0.575243 | 3.376300  | -2.458307 |
| 38 | 6 | 0 | -0.304185 | 4.573461  | -1.803006 |
| 39 | 1 | 0 | 0.499531  | 5.408366  | -0.001619 |
| 40 | 1 | 0 | -1.020441 | 3.407857  | -3.451124 |
| 41 | 6 | 0 | 1.878875  | 0.308225  | 0.947561  |
| 42 | 6 | 0 | 1.828930  | -0.471992 | 2.138323  |
| 43 | 6 | 0 | 3.175495  | 0.734641  | 0.527184  |
| 44 | 6 | 0 | 2.991474  | -0.798067 | 2.832021  |
| 45 | 6 | 0 | 4.310697  | 0.387057  | 1.254959  |
| 46 | 6 | 0 | 4.251415  | -0.384452 | 2.412115  |
| 47 | 1 | 0 | 2.907338  | -1.384991 | 3.744811  |
| 48 | 1 | 0 | 5.282334  | 0.720777  | 0.895407  |
| 49 | 6 | 0 | 3.396600  | 1.531909  | -0.737632 |
| 50 | 1 | 0 | 2.840694  | 1.115171  | -1.583990 |
| 51 | 1 | 0 | 3.063671  | 2.570015  | -0.643164 |
| 52 | 1 | 0 | 4.458849  | 1.545464  | -0.998622 |
| 53 | 6 | 0 | 0.523689  | -0.929695 | 2.740211  |
| 54 | 1 | 0 | -0.187544 | -0.102068 | 2.832837  |
| 55 | 1 | 0 | 0.035030  | -1.706028 | 2.141870  |
| 56 | 1 | 0 | 0.684882  | -1.345969 | 3.738570  |
| 57 | 6 | 0 | 5.498236  | -0.775531 | 3.160975  |
| 58 | 1 | 0 | 5.294375  | -0.924435 | 4.225774  |
| 59 | 1 | 0 | 5.919739  | -1.713775 | 2.778968  |
| 60 | 1 | 0 | 6.276912  | -0.012206 | 3.068713  |
| 61 | 6 | 0 | 1.176963  | 3.322405  | 1.450870  |
| 62 | 1 | 0 | 0.659701  | 2.628522  | 2.122441  |
| 63 | 1 | 0 | 2.233263  | 3.038359  | 1.480222  |
| 64 | 1 | 0 | 1.090954  | 4.331372  | 1.864803  |
| 65 | 6 | 0 | -0.574573 | 0.912361  | -2.724838 |
| 66 | 1 | 0 | 0.270174  | 0.215565  | -2.728122 |
| 67 | 1 | 0 | -1.443314 | 0.357888  | -2.352194 |
| 68 | 1 | 0 | -0.789261 | 1.186917  | -3.761684 |

|    |   |   |           |          |           |
|----|---|---|-----------|----------|-----------|
| 69 | 6 | 0 | -0.658563 | 5.903121 | -2.415310 |
| 70 | 1 | 0 | -1.650847 | 6.243242 | -2.093325 |
| 71 | 1 | 0 | 0.055974  | 6.680373 | -2.127197 |
| 72 | 1 | 0 | -0.675923 | 5.847316 | -3.507954 |

Step6

Method: cam-b3lyp/6-31+G(d,p) TD(NStates=1, Root=1)  
 SCRF(Solvent=THF,ExternalIteration,NonEquilibrium=Save)  
 After PCM corrections, the energy is -1508.24232448 a.u.

Excited State 1: Singlet-A 2.6746 eV 463.56 nm f=0.0378  
 <S\*\*2>=0.000  
 132 ->133 -0.68168

Step7

Method: cam-b3lyp/6-31+G(d,p) SCRF(Solvent=THF, NonEquilibrium=Read)

SCF Done: E(RCAM-B3LYP) = -1508.33295072 a.u.

Results

|                 |   |            |          |            |
|-----------------|---|------------|----------|------------|
| Absorb Energy   | = | 0.143 a.u. | 3.890 eV | 318.714 nm |
| Emission Energy | = | 0.091 a.u. | 2.466 eV | 502.761 nm |
| Stokes Shift    | = | 0.052 a.u. | 1.424 eV | 184.047 nm |

Compound 7 ACN

Step1

Method: cam-b3lyp/6-31G(d)  
 Solvent : Acetonitrile  
 SCF Done: E(RCAM-B3LYP) = -1508.26117905 a.u.  
 Lowest frequency = 18.7382

Standard orientation:

| Center Number | Atomic Number | Atomic Type | Coordinates (Angstroms) |           |           |
|---------------|---------------|-------------|-------------------------|-----------|-----------|
|               |               |             | X                       | Y         | Z         |
| 1             | 6             | 0           | -2.427704               | -1.611848 | 0.145369  |
| 2             | 6             | 0           | -1.357477               | -2.510522 | -0.207563 |
| 3             | 6             | 0           | -0.241060               | -1.734009 | -0.500676 |
| 4             | 7             | 0           | -0.527820               | -0.369389 | -0.278881 |
| 5             | 6             | 0           | -1.912231               | -0.312160 | 0.058223  |
| 6             | 6             | 0           | -2.736606               | 0.777177  | 0.358448  |
| 7             | 6             | 0           | -4.052095               | 0.535783  | 0.708020  |
| 8             | 6             | 0           | -4.570019               | -0.768840 | 0.784172  |
| 9             | 6             | 0           | -3.757184               | -1.856144 | 0.505942  |
| 10            | 6             | 0           | -1.325914               | -3.920041 | -0.297597 |
| 11            | 6             | 0           | -0.178853               | -4.529618 | -0.710825 |
| 12            | 6             | 0           | 0.948335                | -3.762949 | -1.128936 |
| 13            | 6             | 0           | 0.924180                | -2.335981 | -1.071527 |
| 14            | 8             | 0           | -5.881799               | -0.854376 | 1.141511  |
| 15            | 6             | 0           | -6.456357               | -2.144172 | 1.240270  |

|    |   |   |           |           |           |
|----|---|---|-----------|-----------|-----------|
| 16 | 6 | 0 | 2.089873  | -4.410625 | -1.661785 |
| 17 | 6 | 0 | 3.142074  | -3.695614 | -2.171803 |
| 18 | 6 | 0 | 3.083418  | -2.287548 | -2.188851 |
| 19 | 6 | 0 | 2.004629  | -1.630658 | -1.653682 |
| 20 | 1 | 0 | -2.374523 | 1.794183  | 0.318088  |
| 21 | 1 | 0 | -4.717393 | 1.362305  | 0.933786  |
| 22 | 1 | 0 | -4.125787 | -2.872929 | 0.561432  |
| 23 | 1 | 0 | -2.203321 | -4.501910 | -0.032958 |
| 24 | 1 | 0 | -0.118167 | -5.611890 | -0.772846 |
| 25 | 1 | 0 | -7.495210 | -1.992477 | 1.533266  |
| 26 | 1 | 0 | -5.950289 | -2.750441 | 2.000143  |
| 27 | 1 | 0 | -6.423825 | -2.671176 | 0.279924  |
| 28 | 1 | 0 | 2.104355  | -5.496802 | -1.677360 |
| 29 | 1 | 0 | 4.004913  | -4.208066 | -2.585116 |
| 30 | 1 | 0 | 3.891631  | -1.717726 | -2.636222 |
| 31 | 1 | 0 | 1.973986  | -0.552536 | -1.697312 |
| 32 | 5 | 0 | 0.388716  | 0.731920  | -0.007555 |
| 33 | 6 | 0 | -0.077957 | 2.199485  | -0.347342 |
| 34 | 6 | 0 | -0.019048 | 3.236458  | 0.609781  |
| 35 | 6 | 0 | -0.506300 | 2.520822  | -1.655510 |
| 36 | 6 | 0 | -0.384516 | 4.533850  | 0.256896  |
| 37 | 6 | 0 | -0.837382 | 3.835698  | -1.976775 |
| 38 | 6 | 0 | -0.791837 | 4.858100  | -1.033984 |
| 39 | 1 | 0 | -0.345911 | 5.315744  | 1.011804  |
| 40 | 1 | 0 | -1.145293 | 4.067595  | -2.993642 |
| 41 | 6 | 0 | 1.791727  | 0.469072  | 0.665864  |
| 42 | 6 | 0 | 1.879115  | -0.303810 | 1.844970  |
| 43 | 6 | 0 | 2.974315  | 1.082378  | 0.185635  |
| 44 | 6 | 0 | 3.109106  | -0.465484 | 2.485187  |
| 45 | 6 | 0 | 4.184949  | 0.875917  | 0.838328  |
| 46 | 6 | 0 | 4.277347  | 0.100784  | 1.992632  |
| 47 | 1 | 0 | 3.150503  | -1.051537 | 3.400358  |
| 48 | 1 | 0 | 5.084115  | 1.340622  | 0.440243  |
| 49 | 6 | 0 | 2.989691  | 1.973475  | -1.036652 |
| 50 | 1 | 0 | 2.415876  | 1.563269  | -1.872692 |
| 51 | 1 | 0 | 2.563132  | 2.956857  | -0.817298 |
| 52 | 1 | 0 | 4.014645  | 2.124741  | -1.385181 |
| 53 | 6 | 0 | 0.680038  | -0.956661 | 2.497388  |
| 54 | 1 | 0 | -0.221603 | -0.341793 | 2.442547  |
| 55 | 1 | 0 | 0.440877  | -1.917405 | 2.030516  |
| 56 | 1 | 0 | 0.884250  | -1.149778 | 3.553797  |
| 57 | 6 | 0 | 5.602591  | -0.118316 | 2.672935  |
| 58 | 1 | 0 | 5.470925  | -0.468860 | 3.699971  |
| 59 | 1 | 0 | 6.196876  | -0.870411 | 2.141220  |
| 60 | 1 | 0 | 6.195205  | 0.801160  | 2.697394  |
| 61 | 6 | 0 | 0.412278  | 2.990258  | 2.037948  |
| 62 | 1 | 0 | -0.080069 | 2.116032  | 2.473886  |
| 63 | 1 | 0 | 1.490378  | 2.818754  | 2.108462  |
| 64 | 1 | 0 | 0.169130  | 3.852309  | 2.664625  |
| 65 | 6 | 0 | -0.621405 | 1.483442  | -2.751011 |
| 66 | 1 | 0 | 0.266014  | 0.848614  | -2.829153 |
| 67 | 1 | 0 | -1.473693 | 0.818064  | -2.582104 |
| 68 | 1 | 0 | -0.765549 | 1.967683  | -3.720185 |
| 69 | 6 | 0 | -1.196445 | 6.263990  | -1.390796 |
| 70 | 1 | 0 | -2.264177 | 6.424890  | -1.201169 |
| 71 | 1 | 0 | -0.647111 | 7.000198  | -0.797326 |
| 72 | 1 | 0 | -1.019001 | 6.473724  | -2.449210 |

-----  
Step2

Method: cam-b3lyp/6-31+G(d,p) TD(NStates=3) SCRF(solvent=acetonitrile)

Excited State 1: Singlet-A 3.8993 eV 317.97 nm f=0.2522  
<S\*\*2>=0.000  
131 ->133 -0.34286  
132 ->133 0.55779

Step3

Method: cam-b3lyp/6-31+G(d,p)  
SCRF(Solvent=acetonitrile,NonEquilibrium=Save)  
SCF Done: E(RCAM-B3LYP) = -1508.35232888 a.u.

Step4

Method: CAM-B3LYP/6-31+G(d,p) TD(NStates=1,Root=1)  
SCRF(Solvent=acetonitrile,ExternalIteration,NonEquilibrium=Read)

After PCM corrections, the energy is -1508.20905877 a.u.

Excited State 1: Singlet-A 3.8898 eV 318.74 nm f=0.1908  
<S\*\*2>=0.000  
131 ->133 -0.35026  
132 ->133 0.55353

Step5

Method: cam-b3lyp/6-31G(d) opt freq(savenormalmodes)  
TD(NStates=1,Root=1)

Total Energy, E(TD-HF/TD-DFT) = -1508.13627257 a.u.  
Lowest frequency = 23.2124

Standard orientation:

| Center<br>Number | Atomic<br>Number | Atomic<br>Type | Coordinates (Angstroms) |           |           |
|------------------|------------------|----------------|-------------------------|-----------|-----------|
|                  |                  |                | X                       | Y         | Z         |
| 1                | 6                | 0              | -2.606496               | -1.234019 | 0.320922  |
| 2                | 6                | 0              | -1.793196               | -2.239359 | -0.345604 |
| 3                | 6                | 0              | -0.528752               | -1.666669 | -0.552259 |
| 4                | 7                | 0              | -0.508271               | -0.368465 | -0.019616 |
| 5                | 6                | 0              | -1.762867               | -0.115076 | 0.494157  |
| 6                | 6                | 0              | -2.232260               | 1.046896  | 1.125202  |
| 7                | 6                | 0              | -3.540794               | 1.065323  | 1.564417  |
| 8                | 6                | 0              | -4.383253               | -0.045244 | 1.383907  |
| 9                | 6                | 0              | -3.913135               | -1.216594 | 0.752194  |
| 10               | 6                | 0              | -2.094181               | -3.533826 | -0.763396 |
| 11               | 6                | 0              | -1.119341               | -4.258174 | -1.414345 |
| 12               | 6                | 0              | 0.162122                | -3.714202 | -1.665661 |
| 13               | 6                | 0              | 0.500005                | -2.389054 | -1.231451 |
| 14               | 8                | 0              | -5.633550               | 0.097513  | 1.846499  |
| 15               | 6                | 0              | -6.557208               | -0.977819 | 1.707247  |
| 16               | 6                | 0              | 1.129313                | -4.479717 | -2.368831 |
| 17               | 6                | 0              | 2.369150                | -3.971104 | -2.646309 |
| 18               | 6                | 0              | 2.700245                | -2.669183 | -2.217210 |
| 19               | 6                | 0              | 1.794572                | -1.901762 | -1.525234 |
| 20               | 1                | 0              | -1.591131               | 1.908140  | 1.253226  |
| 21               | 1                | 0              | -3.951278               | 1.939339  | 2.056089  |

|    |   |   |           |           |           |
|----|---|---|-----------|-----------|-----------|
| 22 | 1 | 0 | -4.557778 | -2.074417 | 0.610417  |
| 23 | 1 | 0 | -3.076806 | -3.958408 | -0.586980 |
| 24 | 1 | 0 | -1.328656 | -5.266484 | -1.756975 |
| 25 | 1 | 0 | -7.486464 | -0.627253 | 2.153103  |
| 26 | 1 | 0 | -6.207369 | -1.866484 | 2.240354  |
| 27 | 1 | 0 | -6.723915 | -1.217004 | 0.653033  |
| 28 | 1 | 0 | 0.859070  | -5.482282 | -2.686553 |
| 29 | 1 | 0 | 3.098445  | -4.565877 | -3.186425 |
| 30 | 1 | 0 | 3.687257  | -2.269247 | -2.426472 |
| 31 | 1 | 0 | 2.072611  | -0.915329 | -1.187497 |
| 32 | 5 | 0 | 0.615850  | 0.672232  | 0.088661  |
| 33 | 6 | 0 | 0.314402  | 2.045003  | -0.604568 |
| 34 | 6 | 0 | 0.585906  | 3.276332  | 0.064468  |
| 35 | 6 | 0 | -0.285552 | 2.142982  | -1.892291 |
| 36 | 6 | 0 | 0.269840  | 4.493756  | -0.533178 |
| 37 | 6 | 0 | -0.586523 | 3.382609  | -2.451116 |
| 38 | 6 | 0 | -0.320623 | 4.579154  | -1.792208 |
| 39 | 1 | 0 | 0.478418  | 5.412281  | 0.012383  |
| 40 | 1 | 0 | -1.031581 | 3.415175  | -3.443937 |
| 41 | 6 | 0 | 1.877234  | 0.312846  | 0.946412  |
| 42 | 6 | 0 | 1.828194  | -0.468192 | 2.136588  |
| 43 | 6 | 0 | 3.172771  | 0.742936  | 0.527171  |
| 44 | 6 | 0 | 2.991806  | -0.794065 | 2.829714  |
| 45 | 6 | 0 | 4.309044  | 0.395868  | 1.253991  |
| 46 | 6 | 0 | 4.251223  | -0.378287 | 2.409846  |
| 47 | 1 | 0 | 2.908673  | -1.382351 | 3.741704  |
| 48 | 1 | 0 | 5.280060  | 0.731839  | 0.894897  |
| 49 | 6 | 0 | 3.391733  | 1.545289  | -0.734772 |
| 50 | 1 | 0 | 2.835158  | 1.131203  | -1.581962 |
| 51 | 1 | 0 | 3.057963  | 2.582629  | -0.634236 |
| 52 | 1 | 0 | 4.453552  | 1.561119  | -0.997102 |
| 53 | 6 | 0 | 0.523454  | -0.927832 | 2.738303  |
| 54 | 1 | 0 | -0.189688 | -0.101726 | 2.828832  |
| 55 | 1 | 0 | 0.036564  | -1.705690 | 2.140431  |
| 56 | 1 | 0 | 0.684801  | -1.342634 | 3.737210  |
| 57 | 6 | 0 | 5.499054  | -0.768904 | 3.157505  |
| 58 | 1 | 0 | 5.295281  | -0.923241 | 4.221482  |
| 59 | 1 | 0 | 5.923166  | -1.704279 | 2.771464  |
| 60 | 1 | 0 | 6.275747  | -0.003251 | 3.068265  |
| 61 | 6 | 0 | 1.162426  | 3.324092  | 1.459812  |
| 62 | 1 | 0 | 0.645053  | 2.627800  | 2.128808  |
| 63 | 1 | 0 | 2.219332  | 3.042104  | 1.488413  |
| 64 | 1 | 0 | 1.074232  | 4.331783  | 1.876211  |
| 65 | 6 | 0 | -0.576891 | 0.918739  | -2.723256 |
| 66 | 1 | 0 | 0.271749  | 0.226604  | -2.729874 |
| 67 | 1 | 0 | -1.441289 | 0.358229  | -2.349572 |
| 68 | 1 | 0 | -0.795925 | 1.194940  | -3.758723 |
| 69 | 6 | 0 | -0.679679 | 5.909201  | -2.401105 |
| 70 | 1 | 0 | -1.672561 | 6.245280  | -2.076864 |
| 71 | 1 | 0 | 0.032516  | 6.688086  | -2.111705 |
| 72 | 1 | 0 | -0.698634 | 5.855729  | -3.493791 |

-----

Step6

Method: cam-b3lyp/6-31+G(d,p) TD(NStates=1, Root=1)  
 SCRF(Solvent=acetonitrile,ExternalIteration,NonEquilibrium=Save)  
 After PCM corrections, the energy is -1508.24768443 a.u.

Excited State 1: Singlet-A 2.6278 eV 471.82 nm f=0.0392  
 <S\*\*2>=0.000  
 132 ->133 -0.68182

Step7

Method: cam-b3lyp/6-31+G(d,p) SCRF(Solvent=acetonitrile,  
 NonEquilibrium=Read)

SCF Done: E(RCAM-B3LYP) = -1508.33373209 a.u.

Results

| -----           |   |            |          |            |  |  |
|-----------------|---|------------|----------|------------|--|--|
| Absorb Energy   | = | 0.143 a.u. | 3.899 eV | 318.024 nm |  |  |
| -----           |   |            |          |            |  |  |
| Emission Energy | = | 0.086 a.u. | 2.341 eV | 529.513 nm |  |  |
| -----           |   |            |          |            |  |  |
| Stokes Shift    | = | 0.057 a.u. | 1.557 eV | 211.489 nm |  |  |
| -----           |   |            |          |            |  |  |

Compound 8 n-hexane

Step1

Method: cam-b3lyp/6-31G(d)  
 Solvent : n-Hexane  
 SCF Done: E(RCAM-B3LYP) = -1730.74265509 a.u.  
 Lowest frequency = 14.3761

Standard orientation:

| -----            |                  |                |                         |           |           |  |
|------------------|------------------|----------------|-------------------------|-----------|-----------|--|
| Center<br>Number | Atomic<br>Number | Atomic<br>Type | Coordinates (Angstroms) |           |           |  |
|                  |                  |                | X                       | Y         | Z         |  |
| -----            |                  |                |                         |           |           |  |
| 1                | 5                | 0              | 0.802081                | 0.715867  | -0.027069 |  |
| 2                | 6                | 0              | 0.805466                | 2.983019  | 2.001788  |  |
| 3                | 1                | 0              | 0.237898                | 2.142384  | 2.412084  |  |
| 4                | 1                | 0              | 1.865120                | 2.751016  | 2.141545  |  |
| 5                | 1                | 0              | 0.572390                | 3.863189  | 2.606828  |  |
| 6                | 6                | 0              | 3.511039                | 1.843110  | -0.884335 |  |
| 7                | 1                | 0              | 4.562485                | 1.949386  | -1.164350 |  |
| 8                | 1                | 0              | 2.976512                | 1.458435  | -1.757844 |  |
| 9                | 1                | 0              | 3.113821                | 2.844221  | -0.692653 |  |
| 10               | 6                | 0              | 0.857731                | -0.993259 | 2.483193  |  |
| 11               | 1                | 0              | -0.007914               | -0.331944 | 2.394935  |  |
| 12               | 1                | 0              | 0.597415                | -1.931799 | 1.984121  |  |
| 13               | 1                | 0              | 0.992873                | -1.216057 | 3.544802  |  |
| 14               | 6                | 0              | 5.787072                | -0.363258 | 2.975944  |  |
| 15               | 1                | 0              | 6.339090                | -1.196232 | 2.525169  |  |
| 16               | 1                | 0              | 6.453297                | 0.504538  | 2.975520  |  |
| 17               | 1                | 0              | 5.578037                | -0.633263 | 4.014594  |  |
| 18               | 6                | 0              | 4.519033                | -0.083748 | 2.214247  |  |
| 19               | 6                | 0              | 4.533632                | 0.695299  | 1.060171  |  |
| 20               | 1                | 0              | 5.475167                | 1.122327  | 0.722450  |  |
| 21               | 6                | 0              | 3.377829                | 0.953046  | 0.331757  |  |
| 22               | 6                | 0              | 2.142586                | 0.389483  | 0.733491  |  |
| 23               | 6                | 0              | 2.121905                | -0.389613 | 1.912036  |  |
| 24               | 6                | 0              | 3.299585                | -0.601448 | 2.628759  |  |
| 25               | 1                | 0              | 3.258050                | -1.190627 | 3.541819  |  |



|    |   |   |           |           |           |
|----|---|---|-----------|-----------|-----------|
| 26 | 6 | 0 | 0.088771  | 2.526275  | -1.737906 |
| 27 | 6 | 0 | -0.165034 | 3.851290  | -2.084608 |
| 28 | 1 | 0 | -0.412448 | 4.086858  | -3.117036 |
| 29 | 6 | 0 | -0.121886 | 4.878750  | -1.148168 |
| 30 | 6 | 0 | 0.189652  | 4.547261  | 0.167040  |
| 31 | 1 | 0 | 0.210895  | 5.331765  | 0.919852  |
| 32 | 6 | 0 | 0.477759  | 3.239098  | 0.548088  |
| 33 | 6 | 0 | 0.428584  | 2.198476  | -0.405940 |
| 34 | 6 | 0 | -0.017979 | 1.484905  | -2.830346 |
| 35 | 1 | 0 | -0.926749 | 0.884560  | -2.722532 |
| 36 | 1 | 0 | -0.054247 | 1.964960  | -3.811646 |
| 37 | 1 | 0 | 0.823857  | 0.786761  | -2.836785 |
| 38 | 6 | 0 | -0.383517 | 6.306508  | -1.548055 |
| 39 | 1 | 0 | -0.823965 | 6.877235  | -0.725699 |
| 40 | 1 | 0 | 0.547237  | 6.811059  | -1.832781 |
| 41 | 1 | 0 | -1.060205 | 6.363799  | -2.405174 |
| 42 | 7 | 0 | -0.152600 | -0.345370 | -0.351238 |
| 43 | 6 | 0 | -1.538543 | -0.223189 | -0.083452 |
| 44 | 6 | 0 | 0.084886  | -1.722084 | -0.576106 |
| 45 | 6 | 0 | -2.119685 | -1.503594 | -0.041038 |
| 46 | 6 | 0 | -2.314597 | 0.907425  | 0.186956  |
| 47 | 6 | 0 | -1.077898 | -2.448599 | -0.351455 |
| 48 | 6 | 0 | 1.251933  | -2.368819 | -1.089919 |
| 49 | 6 | 0 | -3.470865 | -1.668467 | 0.250109  |
| 50 | 6 | 0 | -3.658643 | 0.731999  | 0.467642  |
| 51 | 1 | 0 | -1.894018 | 1.901981  | 0.176217  |
| 52 | 6 | 0 | -1.109011 | -3.855946 | -0.463739 |
| 53 | 6 | 0 | 1.210639  | -3.793498 | -1.172462 |
| 54 | 6 | 0 | 2.397799  | -1.707903 | -1.591495 |
| 55 | 6 | 0 | -4.236604 | -0.543122 | 0.499801  |
| 56 | 1 | 0 | -3.916347 | -2.656293 | 0.286141  |
| 57 | 1 | 0 | -4.274601 | 1.600376  | 0.674368  |
| 58 | 6 | 0 | 0.028021  | -4.511271 | -0.829058 |
| 59 | 1 | 0 | -2.025600 | -4.398568 | -0.254933 |
| 60 | 6 | 0 | 2.346939  | -4.487130 | -1.653870 |
| 61 | 6 | 0 | 3.471677  | -2.408172 | -2.077642 |
| 62 | 1 | 0 | 2.425487  | -0.629150 | -1.608389 |
| 63 | 1 | 0 | 0.041418  | -5.594032 | -0.908463 |
| 64 | 6 | 0 | 3.459503  | -3.816626 | -2.088908 |
| 65 | 1 | 0 | 2.309321  | -5.572229 | -1.690449 |
| 66 | 1 | 0 | 4.333161  | -1.871312 | -2.461822 |
| 67 | 1 | 0 | 4.318608  | -4.364106 | -2.463367 |
| 68 | 6 | 0 | -5.704218 | -0.669529 | 0.759041  |
| 69 | 9 | 0 | -6.118997 | 0.184736  | 1.713718  |
| 70 | 9 | 0 | -6.437031 | -0.396037 | -0.339016 |
| 71 | 9 | 0 | -6.046150 | -1.908808 | 1.153978  |

-----

Step2

Method: cam-b3lyp/6-31+G(d,p) TD(NStates=3) SCRF(solvent=n-hexane)

Excited State 1: Singlet-A 3.9561 eV 313.40 nm f=0.2261  
 <S\*\*2>=0.000  
 139 ->141 -0.23510  
 140 ->141 0.62295

Step3

Method: cam-b3lyp/6-31+G(d,p) SCRF(Solvent=n-hexane,NonEquilibrium=Save)

SCF Done: E(RCAM-B3LYP) = -1730.84930507 a.u.

Step4

Method: CAM-B3LYP/6-31+G(d,p) TD(NStates=1,Root=1)  
SCRF(Solvent=n-hexane,ExternalIteration,NonEquilibrium=Read)

After PCM corrections, the energy is -1730.70547374 a.u.

Excited State 1: Singlet-A 3.9271 eV 315.71 nm f=0.1594  
<S\*\*2>=0.000  
139 ->141 0.18508  
140 ->141 0.64198

Step5

Method: cam-b3lyp/6-31G(d) opt freq(savenormalmodes)  
TD(NStates=1,Root=1)

Total Energy, E(TD-HF/TD-DFT) = -1730.61504263 a.u.  
Lowest frequency = 10.7260

Standard orientation:

| Center Number | Atomic Number | Atomic Type | Coordinates (Angstroms) |           |           |
|---------------|---------------|-------------|-------------------------|-----------|-----------|
|               |               |             | X                       | Y         | Z         |
| 1             | 5             | 0           | 0.946781                | 0.692590  | 0.062507  |
| 2             | 6             | 0           | 1.159793                | 3.374063  | 1.454238  |
| 3             | 1             | 0           | 0.634378                | 2.645189  | 2.080205  |
| 4             | 1             | 0           | 2.226284                | 3.171885  | 1.591081  |
| 5             | 1             | 0           | 0.957486                | 4.374384  | 1.848212  |
| 6             | 6             | 0           | 3.711644                | 1.759105  | -0.495521 |
| 7             | 1             | 0           | 4.789994                | 1.848806  | -0.656352 |
| 8             | 1             | 0           | 3.266570                | 1.308022  | -1.388755 |
| 9             | 1             | 0           | 3.298425                | 2.770642  | -0.438187 |
| 10            | 6             | 0           | 0.691437                | -0.863435 | 2.731761  |
| 11            | 1             | 0           | -0.077015               | -0.083831 | 2.716530  |
| 12            | 1             | 0           | 0.313202                | -1.699373 | 2.133822  |
| 13            | 1             | 0           | 0.779303                | -1.221473 | 3.761348  |
| 14            | 6             | 0           | 5.588714                | -0.405686 | 3.594092  |
| 15            | 1             | 0           | 6.153200                | -1.265165 | 3.211032  |
| 16            | 1             | 0           | 6.281613                | 0.440640  | 3.635357  |
| 17            | 1             | 0           | 5.289039                | -0.646365 | 4.618498  |
| 18            | 6             | 0           | 4.394014                | -0.099224 | 2.730578  |
| 19            | 6             | 0           | 4.511058                | 0.674299  | 1.578947  |
| 20            | 1             | 0           | 5.487780                | 1.072751  | 1.310573  |
| 21            | 6             | 0           | 3.429807                | 0.946595  | 0.747130  |
| 22            | 6             | 0           | 2.129721                | 0.433319  | 1.046355  |
| 23            | 6             | 0           | 2.018293                | -0.340842 | 2.237116  |
| 24            | 6             | 0           | 3.129412                | -0.589787 | 3.037119  |
| 25            | 1             | 0           | 2.998142                | -1.173623 | 3.946226  |
| 26            | 6             | 0           | 0.115689                | 2.087223  | -2.007018 |
| 27            | 6             | 0           | -0.203697               | 3.302156  | -2.605178 |
| 28            | 1             | 0           | -0.563283               | 3.301229  | -3.632459 |
| 29            | 6             | 0           | -0.065929               | 4.516121  | -1.940401 |
| 30            | 6             | 0           | 0.397805                | 4.472655  | -0.629047 |
| 31            | 1             | 0           | 0.490899                | 5.404124  | -0.073787 |
| 32            | 6             | 0           | 0.729080                | 3.280222  | 0.008929  |
| 33            | 6             | 0           | 0.604010                | 2.032139  | -0.671700 |

|    |   |   |           |           |           |
|----|---|---|-----------|-----------|-----------|
| 34 | 6 | 0 | -0.044785 | 0.843798  | -2.845851 |
| 35 | 1 | 0 | -0.930021 | 0.262573  | -2.562566 |
| 36 | 1 | 0 | -0.157387 | 1.101396  | -3.902833 |
| 37 | 1 | 0 | 0.821810  | 0.181061  | -2.752515 |
| 38 | 6 | 0 | -0.383072 | 5.823443  | -2.616964 |
| 39 | 1 | 0 | -0.739098 | 6.569115  | -1.899358 |
| 40 | 1 | 0 | 0.501917  | 6.246196  | -3.108666 |
| 41 | 1 | 0 | -1.151749 | 5.700321  | -3.385955 |
| 42 | 7 | 0 | -0.093368 | -0.440800 | -0.124647 |
| 43 | 6 | 0 | -1.444613 | -0.259445 | 0.255292  |
| 44 | 6 | 0 | 0.017455  | -1.687089 | -0.644493 |
| 45 | 6 | 0 | -2.186943 | -1.418008 | -0.022184 |
| 46 | 6 | 0 | -2.032306 | 0.859301  | 0.819243  |
| 47 | 6 | 0 | -1.251616 | -2.355265 | -0.591963 |
| 48 | 6 | 0 | 1.163170  | -2.362566 | -1.211424 |
| 49 | 6 | 0 | -3.539987 | -1.475303 | 0.263850  |
| 50 | 6 | 0 | -3.396240 | 0.793766  | 1.109645  |
| 51 | 1 | 0 | -1.462659 | 1.757097  | 1.015308  |
| 52 | 6 | 0 | -1.416353 | -3.654959 | -1.046381 |
| 53 | 6 | 0 | 0.948514  | -3.694631 | -1.682291 |
| 54 | 6 | 0 | 2.445618  | -1.811788 | -1.343159 |
| 55 | 6 | 0 | -4.139492 | -0.351788 | 0.834627  |
| 56 | 1 | 0 | -4.127079 | -2.363456 | 0.057752  |
| 57 | 1 | 0 | -3.885758 | 1.649069  | 1.560798  |
| 58 | 6 | 0 | -0.326047 | -4.310393 | -1.582582 |
| 59 | 1 | 0 | -2.383023 | -4.143345 | -0.989431 |
| 60 | 6 | 0 | 2.019390  | -4.407189 | -2.264412 |
| 61 | 6 | 0 | 3.475816  | -2.536188 | -1.919716 |
| 62 | 1 | 0 | 2.633412  | -0.815254 | -0.976499 |
| 63 | 1 | 0 | -0.434586 | -5.325727 | -1.950454 |
| 64 | 6 | 0 | 3.265935  | -3.837270 | -2.388711 |
| 65 | 1 | 0 | 1.838666  | -5.418672 | -2.615376 |
| 66 | 1 | 0 | 4.458509  | -2.083580 | -1.998421 |
| 67 | 1 | 0 | 4.080696  | -4.394549 | -2.838450 |
| 68 | 6 | 0 | -5.614444 | -0.360143 | 1.101210  |
| 69 | 9 | 0 | -5.938626 | 0.419330  | 2.145641  |
| 70 | 9 | 0 | -6.316514 | 0.090712  | 0.045114  |
| 71 | 9 | 0 | -6.064315 | -1.600119 | 1.364410  |

-----

Step6

Method: cam-b3lyp/6-31+G(d,p) TD(NStates=1, Root=1)  
 SCRF(Solvent=n-hexane,ExternalIteration,NonEquilibrium=Save)  
 After PCM corrections, the energy is -1730.72830911 a.u.

Excited State 1: Singlet-A 2.9340 eV 422.58 nm f=0.0460  
 <S\*\*2>=0.000  
 140 ->141 0.68081

Step7

Method: cam-b3lyp/6-31+G(d,p) SCRF(Solvent=n-hexane,  
 NonEquilibrium=Read)

SCF Done: E(RCAM-B3LYP) = -1730.83474599 a.u.

### Results

-----

Absorb Energy = | 0.144 a.u. | 3.914 eV | 316.783 nm

|                 |   |            |          |            |
|-----------------|---|------------|----------|------------|
| Emission Energy | = | 0.106 a.u. | 2.896 eV | 428.079 nm |
| Stokes Shift    | = | 0.037 a.u. | 1.018 eV | 111.295 nm |

Compound 8 THF

Step1

Method: cam-b3lyp/6-31G(d)

Solvent : TetraHydroFuran

SCF Done: E(RCAM-B3LYP) = -1730.74638108 a.u.

Lowest frequency = 14.4483

Standard orientation:

| Center Number | Atomic Number | Atomic Type | Coordinates (Angstroms) |           |           |
|---------------|---------------|-------------|-------------------------|-----------|-----------|
|               |               |             | X                       | Y         | Z         |
| 1             | 5             | 0           | 0.802040                | 0.720299  | -0.024127 |
| 2             | 6             | 0           | 0.812282                | 2.994492  | 1.998199  |
| 3             | 1             | 0           | 0.251702                | 2.151534  | 2.413066  |
| 4             | 1             | 0           | 1.874206                | 2.770251  | 2.134142  |
| 5             | 1             | 0           | 0.576475                | 3.875275  | 2.601118  |
| 6             | 6             | 0           | 3.515964                | 1.843673  | -0.872098 |
| 7             | 1             | 0           | 4.567624                | 1.942189  | -1.153561 |
| 8             | 1             | 0           | 2.976231                | 1.467499  | -1.745911 |
| 9             | 1             | 0           | 3.128175                | 2.847401  | -0.674162 |
| 10            | 6             | 0           | 0.845730                | -0.985599 | 2.488583  |
| 11            | 1             | 0           | -0.013059               | -0.314380 | 2.408186  |
| 12            | 1             | 0           | 0.574388                | -1.917451 | 1.982734  |
| 13            | 1             | 0           | 0.981998                | -1.218388 | 3.547801  |
| 14            | 6             | 0           | 5.778683                | -0.379269 | 2.987189  |
| 15            | 1             | 0           | 6.328293                | -1.213291 | 2.535455  |
| 16            | 1             | 0           | 6.448030                | 0.486000  | 2.988108  |
| 17            | 1             | 0           | 5.566827                | -0.650635 | 4.024841  |
| 18            | 6             | 0           | 4.512755                | -0.093955 | 2.223992  |
| 19            | 6             | 0           | 4.531828                | 0.687000  | 1.070829  |
| 20            | 1             | 0           | 5.475412                | 1.110677  | 0.734870  |
| 21            | 6             | 0           | 3.377500                | 0.950762  | 0.341320  |
| 22            | 6             | 0           | 2.139522                | 0.391249  | 0.740554  |
| 23            | 6             | 0           | 2.114012                | -0.389012 | 1.918611  |
| 24            | 6             | 0           | 3.290079                | -0.607230 | 2.636655  |
| 25            | 1             | 0           | 3.244891                | -1.196464 | 3.549491  |
| 26            | 6             | 0           | 0.084379                | 2.525497  | -1.738785 |
| 27            | 6             | 0           | -0.172587               | 3.849444  | -2.088185 |
| 28            | 1             | 0           | -0.422228               | 4.082313  | -3.120651 |
| 29            | 6             | 0           | -0.128923               | 4.879531  | -1.154061 |
| 30            | 6             | 0           | 0.186870                | 4.551714  | 0.161388  |
| 31            | 1             | 0           | 0.208825                | 5.338137  | 0.912101  |
| 32            | 6             | 0           | 0.478473                | 3.244751  | 0.544783  |
| 33            | 6             | 0           | 0.427954                | 2.201266  | -0.406476 |
| 34            | 6             | 0           | -0.020394               | 1.482471  | -2.830032 |
| 35            | 1             | 0           | -0.923939               | 0.875112  | -2.717641 |
| 36            | 1             | 0           | -0.065176               | 1.961997  | -3.811115 |
| 37            | 1             | 0           | 0.827390                | 0.791578  | -2.840449 |
| 38            | 6             | 0           | -0.394394               | 6.305813  | -1.556680 |
| 39            | 1             | 0           | -0.833441               | 6.877421  | -0.734282 |
| 40            | 1             | 0           | 0.535074                | 6.810962  | -1.844402 |

|    |   |   |           |           |           |
|----|---|---|-----------|-----------|-----------|
| 41 | 1 | 0 | -1.072335 | 6.359353  | -2.412969 |
| 42 | 7 | 0 | -0.151948 | -0.343307 | -0.349436 |
| 43 | 6 | 0 | -1.536745 | -0.224326 | -0.080174 |
| 44 | 6 | 0 | 0.087700  | -1.718234 | -0.580177 |
| 45 | 6 | 0 | -2.117032 | -1.505759 | -0.044575 |
| 46 | 6 | 0 | -2.313441 | 0.904296  | 0.197855  |
| 47 | 6 | 0 | -1.074080 | -2.448076 | -0.359225 |
| 48 | 6 | 0 | 1.256301  | -2.361359 | -1.095857 |
| 49 | 6 | 0 | -3.468199 | -1.673780 | 0.245854  |
| 50 | 6 | 0 | -3.657300 | 0.726714  | 0.477859  |
| 51 | 1 | 0 | -1.893201 | 1.899024  | 0.194976  |
| 52 | 6 | 0 | -1.103096 | -3.855474 | -0.476519 |
| 53 | 6 | 0 | 1.217679  | -3.786155 | -1.182569 |
| 54 | 6 | 0 | 2.401000  | -1.696547 | -1.595892 |
| 55 | 6 | 0 | -4.234131 | -0.549668 | 0.502227  |
| 56 | 1 | 0 | -3.911820 | -2.662641 | 0.275827  |
| 57 | 1 | 0 | -4.272671 | 1.594178  | 0.690094  |
| 58 | 6 | 0 | 0.035771  | -4.507708 | -0.842683 |
| 59 | 1 | 0 | -2.018802 | -4.400433 | -0.270350 |
| 60 | 6 | 0 | 2.355968  | -4.476631 | -1.665108 |
| 61 | 6 | 0 | 3.476829  | -2.393501 | -2.083723 |
| 62 | 1 | 0 | 2.426229  | -0.617717 | -1.612141 |
| 63 | 1 | 0 | 0.051366  | -5.590131 | -0.925181 |
| 64 | 6 | 0 | 3.467689  | -3.802389 | -2.097933 |
| 65 | 1 | 0 | 2.320683  | -5.561630 | -1.704574 |
| 66 | 1 | 0 | 4.336649  | -1.854062 | -2.467910 |
| 67 | 1 | 0 | 4.328111  | -4.346976 | -2.473376 |
| 68 | 6 | 0 | -5.700838 | -0.678319 | 0.761034  |
| 69 | 9 | 0 | -6.118155 | 0.170309  | 1.720420  |
| 70 | 9 | 0 | -6.436193 | -0.398646 | -0.335339 |
| 71 | 9 | 0 | -6.044690 | -1.919343 | 1.148862  |

-----

### Step2

Method: cam-b3lyp/6-31+G(d,p) TD(NStates=3) SCRF(solvent=THF)

Excited State 1: Singlet-A 3.9601 eV 313.09 nm f=0.2309  
 <S\*\*2>=0.000  
 139 ->141 -0.24140  
 140 ->141 0.61985

### Step3

Method: cam-b3lyp/6-31+G(d,p) SCRF(Solvent=THF,NonEquilibrium=Save)  
 SCF Done: E(RCAM-B3LYP) = -1730.85361738 a.u.

### Step4

Method: CAM-B3LYP/6-31+G(d,p) TD(NStates=1,Root=1)  
 SCRF(Solvent=THF,ExternalIteration,NonEquilibrium=Read)

After PCM corrections, the energy is -1730.70901064 a.u.

Excited State 1: Singlet-A 3.9322 eV 315.30 nm f=0.1607  
 <S\*\*2>=0.000  
 137 ->141 -0.10755  
 139 ->141 -0.19098  
 140 ->141 0.63920

Step5

Method: cam-b3lyp/6-31G(d) opt freq(savenormalmodes)  
TD(NStates=1,Root=1)

Total Energy, E(TD-HF/TD-DFT) = -1730.61738604 a.u.  
Lowest frequency = 14.6872

Standard orientation:

| Center<br>Number | Atomic<br>Number | Atomic<br>Type | Coordinates (Angstroms) |           |           |
|------------------|------------------|----------------|-------------------------|-----------|-----------|
|                  |                  |                | X                       | Y         | Z         |
| 1                | 5                | 0              | 0.936286                | 0.694073  | 0.061108  |
| 2                | 6                | 0              | 1.136333                | 3.366820  | 1.484732  |
| 3                | 1                | 0              | 0.614782                | 2.625895  | 2.099579  |
| 4                | 1                | 0              | 2.204749                | 3.170896  | 1.616942  |
| 5                | 1                | 0              | 0.926906                | 4.360391  | 1.891697  |
| 6                | 6                | 0              | 3.702703                | 1.776489  | -0.493922 |
| 7                | 1                | 0              | 4.780180                | 1.871112  | -0.656973 |
| 8                | 1                | 0              | 3.257140                | 1.330845  | -1.389607 |
| 9                | 1                | 0              | 3.286153                | 2.786009  | -0.423850 |
| 10               | 6                | 0              | 0.693987                | -0.879379 | 2.715141  |
| 11               | 1                | 0              | -0.079805               | -0.105264 | 2.695847  |
| 12               | 1                | 0              | 0.324295                | -1.717582 | 2.114917  |
| 13               | 1                | 0              | 0.781141                | -1.237317 | 3.744848  |
| 14               | 6                | 0              | 5.593153                | -0.416666 | 3.576063  |
| 15               | 1                | 0              | 6.160096                | -1.269801 | 3.182879  |
| 16               | 1                | 0              | 6.283339                | 0.431448  | 3.624414  |
| 17               | 1                | 0              | 5.295447                | -0.669730 | 4.597975  |
| 18               | 6                | 0              | 4.396152                | -0.106169 | 2.716650  |
| 19               | 6                | 0              | 4.510118                | 0.676367  | 1.569992  |
| 20               | 1                | 0              | 5.485798                | 1.078060  | 1.302718  |
| 21               | 6                | 0              | 3.426212                | 0.951924  | 0.741930  |
| 22               | 6                | 0              | 2.128820                | 0.432463  | 1.038374  |
| 23               | 6                | 0              | 2.019107                | -0.348423 | 2.224356  |
| 24               | 6                | 0              | 3.132676                | -0.601043 | 3.021866  |
| 25               | 1                | 0              | 3.003896                | -1.192402 | 3.926470  |
| 26               | 6                | 0              | 0.107120                | 2.111011  | -1.991390 |
| 27               | 6                | 0              | -0.218674               | 3.330856  | -2.578659 |
| 28               | 1                | 0              | -0.575935               | 3.338066  | -3.606740 |
| 29               | 6                | 0              | -0.090455               | 4.539027  | -1.900842 |
| 30               | 6                | 0              | 0.370591                | 4.485372  | -0.588086 |
| 31               | 1                | 0              | 0.456225                | 5.411786  | -0.023184 |
| 32               | 6                | 0              | 0.707200                | 3.287722  | 0.038180  |
| 33               | 6                | 0              | 0.589280                | 2.046624  | -0.654535 |
| 34               | 6                | 0              | -0.041515               | 0.873836  | -2.841574 |
| 35               | 1                | 0              | -0.919483               | 0.280199  | -2.561455 |
| 36               | 1                | 0              | -0.158279               | 1.139565  | -3.896104 |
| 37               | 1                | 0              | 0.831415                | 0.218686  | -2.753099 |
| 38               | 6                | 0              | -0.414790               | 5.851518  | -2.564655 |
| 39               | 1                | 0              | -0.777249               | 6.587161  | -1.840057 |
| 40               | 1                | 0              | 0.468632                | 6.285346  | -3.049400 |
| 41               | 1                | 0              | -1.179960               | 5.730934  | -3.337411 |
| 42               | 7                | 0              | -0.092664               | -0.433006 | -0.133365 |
| 43               | 6                | 0              | -1.448652               | -0.259860 | 0.240388  |
| 44               | 6                | 0              | 0.029693                | -1.687119 | -0.642161 |
| 45               | 6                | 0              | -2.178439               | -1.428165 | -0.028906 |
| 46               | 6                | 0              | -2.045811               | 0.854690  | 0.802543  |
| 47               | 6                | 0              | -1.232116               | -2.364723 | -0.584407 |

|    |   |   |           |           |           |
|----|---|---|-----------|-----------|-----------|
| 48 | 6 | 0 | 1.179539  | -2.350940 | -1.211081 |
| 49 | 6 | 0 | -3.531140 | -1.496241 | 0.255192  |
| 50 | 6 | 0 | -3.410111 | 0.779974  | 1.089925  |
| 51 | 1 | 0 | -1.483683 | 1.755712  | 1.005709  |
| 52 | 6 | 0 | -1.384788 | -3.670980 | -1.023206 |
| 53 | 6 | 0 | 0.978535  | -3.691178 | -1.667184 |
| 54 | 6 | 0 | 2.451559  | -1.781980 | -1.367860 |
| 55 | 6 | 0 | -4.141617 | -0.373659 | 0.817585  |
| 56 | 1 | 0 | -4.107824 | -2.392193 | 0.054386  |
| 57 | 1 | 0 | -3.906175 | 1.632873  | 1.538365  |
| 58 | 6 | 0 | -0.287190 | -4.321364 | -1.552850 |
| 59 | 1 | 0 | -2.346098 | -4.168666 | -0.961570 |
| 60 | 6 | 0 | 2.053480  | -4.394166 | -2.254680 |
| 61 | 6 | 0 | 3.484605  | -2.495183 | -1.955210 |
| 62 | 1 | 0 | 2.628637  | -0.777968 | -1.016346 |
| 63 | 1 | 0 | -0.385704 | -5.341961 | -1.908057 |
| 64 | 6 | 0 | 3.289233  | -3.805580 | -2.404214 |
| 65 | 1 | 0 | 1.883830  | -5.411979 | -2.591891 |
| 66 | 1 | 0 | 4.458043  | -2.027292 | -2.057498 |
| 67 | 1 | 0 | 4.106251  | -4.355011 | -2.859222 |
| 68 | 6 | 0 | -5.616076 | -0.393810 | 1.083015  |
| 69 | 9 | 0 | -5.949718 | 0.387632  | 2.124009  |
| 70 | 9 | 0 | -6.323118 | 0.047975  | 0.024843  |
| 71 | 9 | 0 | -6.058484 | -1.635109 | 1.351224  |

-----

Step6

Method: cam-b3lyp/6-31+G(d,p) TD(NStates=1, Root=1)  
 SCRF(Solvent=THF,ExternalIteration,NonEquilibrium=Save)  
 After PCM corrections, the energy is -1730.74132518 a.u.

Excited State 1: Singlet-A 2.8051 eV 441.99 nm f=0.0486  
 <S\*\*2>=0.000  
 140 ->141 0.68289

Step7

Method: cam-b3lyp/6-31+G(d,p) SCRF(Solvent=THF, NonEquilibrium=Read)

SCF Done: E(RCAM-B3LYP) = -1730.83664204 a.u.

Results

|                 |   |            |          |            |
|-----------------|---|------------|----------|------------|
| Absorb Energy   | = | 0.145 a.u. | 3.935 eV | 315.085 nm |
| Emission Energy | = | 0.095 a.u. | 2.594 eV | 478.020 nm |
| Stokes Shift    | = | 0.049 a.u. | 1.341 eV | 162.935 nm |

Compound 8 ACN

Step1

Method: cam-b3lyp/6-31G(d)  
 Solvent : Acetonitrile  
 SCF Done: E(RCAM-B3LYP) = -1730.74792317 a.u.  
 Lowest frequency = 14.6367

## Standard orientation:

| Center<br>Number | Atomic<br>Number | Atomic<br>Type | Coordinates (Angstroms) |           |           |
|------------------|------------------|----------------|-------------------------|-----------|-----------|
|                  |                  |                | X                       | Y         | Z         |
| 1                | 5                | 0              | 0.800736                | 0.724718  | -0.021457 |
| 2                | 6                | 0              | 0.814128                | 3.001658  | 1.998657  |
| 3                | 1                | 0              | 0.257488                | 2.157417  | 2.416000  |
| 4                | 1                | 0              | 1.877304                | 2.781545  | 2.131906  |
| 5                | 1                | 0              | 0.577162                | 3.882526  | 2.600901  |
| 6                | 6                | 0              | 3.517744                | 1.848894  | -0.860538 |
| 7                | 1                | 0              | 4.569571                | 1.944866  | -1.141932 |
| 8                | 1                | 0              | 2.976076                | 1.479475  | -1.735936 |
| 9                | 1                | 0              | 3.134147                | 2.853083  | -0.656551 |
| 10               | 6                | 0              | 0.836730                | -0.979866 | 2.492026  |
| 11               | 1                | 0              | -0.017199               | -0.301881 | 2.416605  |
| 12               | 1                | 0              | 0.557434                | -1.907286 | 1.982329  |
| 13               | 1                | 0              | 0.973482                | -1.218693 | 3.549793  |
| 14               | 6                | 0              | 5.773429                | -0.397658 | 2.989564  |
| 15               | 1                | 0              | 6.321402                | -1.230103 | 2.532964  |
| 16               | 1                | 0              | 6.444768                | 0.465997  | 2.995243  |
| 17               | 1                | 0              | 5.560550                | -0.674715 | 4.025466  |
| 18               | 6                | 0              | 4.508357                | -0.104969 | 2.227666  |
| 19               | 6                | 0              | 4.530060                | 0.680052  | 1.077143  |
| 20               | 1                | 0              | 5.475092                | 1.101407  | 0.742473  |
| 21               | 6                | 0              | 3.376306                | 0.950980  | 0.348813  |
| 22               | 6                | 0              | 2.136441                | 0.394035  | 0.746002  |
| 23               | 6                | 0              | 2.107928                | -0.388782 | 1.922528  |
| 24               | 6                | 0              | 3.283413                | -0.614311 | 2.639560  |
| 25               | 1                | 0              | 3.236070                | -1.205384 | 3.551089  |
| 26               | 6                | 0              | 0.079770                | 2.528039  | -1.737011 |
| 27               | 6                | 0              | -0.179617               | 3.851485  | -2.086829 |
| 28               | 1                | 0              | -0.430690               | 4.083529  | -3.119104 |
| 29               | 6                | 0              | -0.136236               | 4.882335  | -1.153251 |
| 30               | 6                | 0              | 0.182148                | 4.555747  | 0.161960  |
| 31               | 1                | 0              | 0.204191                | 5.342634  | 0.912135  |
| 32               | 6                | 0              | 0.476336                | 3.249326  | 0.545693  |
| 33               | 6                | 0              | 0.425531                | 2.204891  | -0.404710 |
| 34               | 6                | 0              | -0.023416               | 1.484991  | -2.828516 |
| 35               | 1                | 0              | -0.922410               | 0.871584  | -2.712778 |
| 36               | 1                | 0              | -0.075536               | 1.965128  | -3.808879 |
| 37               | 1                | 0              | 0.829198                | 0.800115  | -2.843366 |
| 38               | 6                | 0              | -0.404656               | 6.307911  | -1.556361 |
| 39               | 1                | 0              | -0.843605               | 6.879142  | -0.733687 |
| 40               | 1                | 0              | 0.523780                | 6.814323  | -1.845146 |
| 41               | 1                | 0              | -1.083158               | 6.359627  | -2.412287 |
| 42               | 7                | 0              | -0.151392               | -0.340693 | -0.349547 |
| 43               | 6                | 0              | -1.536008               | -0.225452 | -0.079354 |
| 44               | 6                | 0              | 0.091219                | -1.714396 | -0.583376 |
| 45               | 6                | 0              | -2.113896               | -1.508223 | -0.047339 |
| 46               | 6                | 0              | -2.314774               | 0.900949  | 0.202337  |
| 47               | 6                | 0              | -1.068921               | -2.447635 | -0.364169 |
| 48               | 6                | 0              | 1.261276                | -2.353751 | -1.100693 |
| 49               | 6                | 0              | -3.464887               | -1.679819 | 0.242360  |
| 50               | 6                | 0              | -3.658300               | 0.720140  | 0.481810  |
| 51               | 1                | 0              | -1.896158               | 1.896358  | 0.203608  |
| 52               | 6                | 0              | -1.094508               | -3.855057 | -0.484009 |
| 53               | 6                | 0              | 1.226462                | -3.778664 | -1.189458 |
| 54               | 6                | 0              | 2.403778                | -1.684941 | -1.600875 |
| 55               | 6                | 0              | -4.232712               | -0.557622 | 0.502009  |



|    |   |   |           |           |           |
|----|---|---|-----------|-----------|-----------|
| 56 | 1 | 0 | -3.906369 | -2.669709 | 0.268992  |
| 57 | 1 | 0 | -4.274884 | 1.586015  | 0.696974  |
| 58 | 6 | 0 | 0.046248  | -4.503928 | -0.850844 |
| 59 | 1 | 0 | -2.008765 | -4.402747 | -0.278851 |
| 60 | 6 | 0 | 2.366859  | -4.465441 | -1.672977 |
| 61 | 6 | 0 | 3.481669  | -2.378220 | -2.089893 |
| 62 | 1 | 0 | 2.425545  | -0.605991 | -1.616927 |
| 63 | 1 | 0 | 0.064537  | -5.586162 | -0.934828 |
| 64 | 6 | 0 | 3.476679  | -3.787330 | -2.105238 |
| 65 | 1 | 0 | 2.334806  | -5.550455 | -1.713842 |
| 66 | 1 | 0 | 4.339332  | -1.835909 | -2.474815 |
| 67 | 1 | 0 | 4.338564  | -4.328931 | -2.481540 |
| 68 | 6 | 0 | -5.699038 | -0.689625 | 0.760334  |
| 69 | 9 | 0 | -6.118386 | 0.154864  | 1.722689  |
| 70 | 9 | 0 | -6.435344 | -0.406978 | -0.335136 |
| 71 | 9 | 0 | -6.041704 | -1.932330 | 1.143555  |

-----

Step2

Method: cam-b3lyp/6-31+G(d,p) TD(NStates=3) SCRF(solvent=acetonitrile)

Excited State 1: Singlet-A 3.9630 eV 312.86 nm f=0.2239  
 <S\*\*2>=0.000  
 139 ->141 -0.24342  
 140 ->141 0.61894

Step3

Method: cam-b3lyp/6-31+G(d,p)  
 SCRF(Solvent=acetonitrile,NonEquilibrium=Save)  
 SCF Done: E(RCAM-B3LYP) = -1730.85537834 a.u.

Step4

Method: CAM-B3LYP/6-31+G(d,p) TD(NStates=1,Root=1)  
 SCRF(Solvent=acetonitrile,ExternalIteration,NonEquilibrium=Read)

After PCM corrections, the energy is -1730.71008936 a.u.

Excited State 1: Singlet-A 3.9411 eV 314.59 nm f=0.1632  
 <S\*\*2>=0.000  
 137 ->141 -0.11139  
 139 ->141 -0.20076  
 140 ->141 0.63549

Step5

Method: cam-b3lyp/6-31G(d) opt freq(savenormalmodes)  
 TD(NStates=1,Root=1)

Total Energy, E(TD-HF/TD-DFT) = -1730.61849005 a.u.  
 Lowest frequency = 13.9033

Standard orientation:

-----

| Center<br>Number | Atomic<br>Number | Atomic<br>Type | Coordinates (Angstroms) |          |          |
|------------------|------------------|----------------|-------------------------|----------|----------|
|                  |                  |                | X                       | Y        | Z        |
| 1                | 5                | 0              | 0.929564                | 0.697962 | 0.062357 |

-----

|    |   |   |           |           |           |
|----|---|---|-----------|-----------|-----------|
| 2  | 6 | 0 | 1.126335  | 3.361530  | 1.507715  |
| 3  | 1 | 0 | 0.606080  | 2.613890  | 2.115519  |
| 4  | 1 | 0 | 2.195528  | 3.167471  | 1.637141  |
| 5  | 1 | 0 | 0.914436  | 4.350927  | 1.923343  |
| 6  | 6 | 0 | 3.697884  | 1.787209  | -0.489217 |
| 7  | 1 | 0 | 4.774933  | 1.882845  | -0.653918 |
| 8  | 1 | 0 | 3.250492  | 1.349201  | -1.387732 |
| 9  | 1 | 0 | 3.281889  | 2.796202  | -0.408093 |
| 10 | 6 | 0 | 0.692136  | -0.887415 | 2.706472  |
| 11 | 1 | 0 | -0.081981 | -0.113742 | 2.685371  |
| 12 | 1 | 0 | 0.323738  | -1.726107 | 2.106056  |
| 13 | 1 | 0 | 0.778610  | -1.245018 | 3.736353  |
| 14 | 6 | 0 | 5.595235  | -0.441078 | 3.559018  |
| 15 | 1 | 0 | 6.157532  | -1.294442 | 3.159839  |
| 16 | 1 | 0 | 6.288967  | 0.404013  | 3.608557  |
| 17 | 1 | 0 | 5.299850  | -0.698110 | 4.580577  |
| 18 | 6 | 0 | 4.396619  | -0.122218 | 2.704773  |
| 19 | 6 | 0 | 4.509304  | 0.668812  | 1.563462  |
| 20 | 1 | 0 | 5.485039  | 1.070768  | 1.296914  |
| 21 | 6 | 0 | 3.423558  | 0.952101  | 0.740009  |
| 22 | 6 | 0 | 2.126676  | 0.431380  | 1.034975  |
| 23 | 6 | 0 | 2.017482  | -0.356060 | 2.216513  |
| 24 | 6 | 0 | 3.132745  | -0.616525 | 3.009957  |
| 25 | 1 | 0 | 3.004912  | -1.213794 | 3.910795  |
| 26 | 6 | 0 | 0.100478  | 2.130447  | -1.978130 |
| 27 | 6 | 0 | -0.226587 | 3.354436  | -2.557012 |
| 28 | 1 | 0 | -0.583413 | 3.368661  | -3.585154 |
| 29 | 6 | 0 | -0.100341 | 4.557945  | -1.870183 |
| 30 | 6 | 0 | 0.359957  | 4.495560  | -0.557149 |
| 31 | 1 | 0 | 0.443653  | 5.417991  | 0.014504  |
| 32 | 6 | 0 | 0.697497  | 3.293559  | 0.060540  |
| 33 | 6 | 0 | 0.580815  | 2.057567  | -0.641007 |
| 34 | 6 | 0 | -0.045675 | 0.898686  | -2.836551 |
| 35 | 1 | 0 | -0.920060 | 0.299386  | -2.557388 |
| 36 | 1 | 0 | -0.166787 | 1.171075  | -3.888871 |
| 37 | 1 | 0 | 0.829801  | 0.246064  | -2.754452 |
| 38 | 6 | 0 | -0.426295 | 5.874886  | -2.524519 |
| 39 | 1 | 0 | -0.792553 | 6.603768  | -1.795067 |
| 40 | 1 | 0 | 0.457388  | 6.314906  | -3.003142 |
| 41 | 1 | 0 | -1.188575 | 5.758273  | -3.300655 |
| 42 | 7 | 0 | -0.093631 | -0.427397 | -0.139251 |
| 43 | 6 | 0 | -1.452057 | -0.260538 | 0.231202  |
| 44 | 6 | 0 | 0.036058  | -1.683615 | -0.644841 |
| 45 | 6 | 0 | -2.174317 | -1.434031 | -0.035969 |
| 46 | 6 | 0 | -2.055567 | 0.850634  | 0.793268  |
| 47 | 6 | 0 | -1.221508 | -2.367977 | -0.585453 |
| 48 | 6 | 0 | 1.189050  | -2.340119 | -1.214605 |
| 49 | 6 | 0 | -3.526954 | -1.509306 | 0.246616  |
| 50 | 6 | 0 | -3.420004 | 0.769219  | 1.078592  |
| 51 | 1 | 0 | -1.498234 | 1.753693  | 1.000798  |
| 52 | 6 | 0 | -1.365662 | -3.677435 | -1.017078 |
| 53 | 6 | 0 | 0.997660  | -3.685010 | -1.662241 |
| 54 | 6 | 0 | 2.454489  | -1.759959 | -1.384106 |
| 55 | 6 | 0 | -4.144412 | -0.388836 | 0.805973  |
| 56 | 1 | 0 | -4.097608 | -2.409325 | 0.047141  |
| 57 | 1 | 0 | -3.920646 | 1.619611  | 1.526675  |
| 58 | 6 | 0 | -0.263062 | -4.323900 | -1.542062 |
| 59 | 1 | 0 | -2.323642 | -4.181107 | -0.954004 |
| 60 | 6 | 0 | 2.076484  | -4.382181 | -2.249882 |
| 61 | 6 | 0 | 3.490916  | -2.466773 | -1.974255 |

|    |   |   |           |           |           |
|----|---|---|-----------|-----------|-----------|
| 62 | 1 | 0 | 2.623562  | -0.751071 | -1.042677 |
| 63 | 1 | 0 | -0.354827 | -5.347183 | -1.891033 |
| 64 | 6 | 0 | 3.305955  | -3.782688 | -2.411097 |
| 65 | 1 | 0 | 1.914802  | -5.403859 | -2.578930 |
| 66 | 1 | 0 | 4.458577  | -1.989552 | -2.088172 |
| 67 | 1 | 0 | 4.125539  | -4.327663 | -2.866757 |
| 68 | 6 | 0 | -5.618803 | -0.416854 | 1.070193  |
| 69 | 9 | 0 | -5.957957 | 0.363086  | 2.110949  |
| 70 | 9 | 0 | -6.327894 | 0.021826  | 0.011563  |
| 71 | 9 | 0 | -6.055919 | -1.659857 | 1.338145  |

-----

Step6

Method: cam-b3lyp/6-31+G(d,p) TD(NStates=1, Root=1)  
 SCRF(Solvent=acetonitrile,ExternalIteration,NonEquilibrium=Save)  
 After PCM corrections, the energy is -1730.74656548 a.u.

Excited State 1: Singlet-A 2.7546 eV 450.10 nm f=0.0498  
 <S\*\*2>=0.000  
 140 ->141 0.68381

Step7

Method: cam-b3lyp/6-31+G(d,p) SCRF(Solvent=acetonitrile,  
 NonEquilibrium=Read)

SCF Done: E(RCAM-B3LYP) = -1730.83696192 a.u.

Results

|                 |   |            |          |            |
|-----------------|---|------------|----------|------------|
| Absorb Energy   | = | 0.145 a.u. | 3.954 eV | 313.605 nm |
| Emission Energy | = | 0.090 a.u. | 2.460 eV | 504.039 nm |
| Stokes Shift    | = | 0.055 a.u. | 1.494 eV | 190.434 nm |

-----
